# Supplementary material
Source: PubMed Central journal article supplement (PMC9763054)
Supplement: NIHMS1852089-supplement-SI-4.pdf [file NIHMS1852089-supplement-SI-4.pdf]

# Target Compound Screening Report

|                                 |                                        |                               |                                                     |
|---------------------------------|----------------------------------------|-------------------------------|-----------------------------------------------------|
| <b>Data File</b>                | 1d.d                                   | <b>Sample Name</b>            | H3475346                                            |
| <b>Sample Type</b>              | Sample                                 | <b>Position</b>               | P1-C1                                               |
| <b>Instrument Name</b>          | Instrument 1                           | <b>User Name</b>              | Denis V.Bylina                                      |
| <b>Acq Method</b>               | Fast_Gradient_HRMS_pos_Lock_08272019.m | <b>Acquired Time</b>          | 10/7/2021 9:13:35 AM (UTC+03:00)                    |
| <b>IRM Calibration Status</b>   | Success                                | <b>DA Method</b>              | 1.m                                                 |
| <b>Comment</b>                  |                                        |                               |                                                     |
| <b>Sample Group</b>             |                                        | <b>Info.</b>                  | Agilent 6224 TOF LC/MS                              |
| <b>MFC</b>                      | C23H28N4O2                             | <b>Stream Name</b>            | LC 1                                                |
| <b>Acquisition Time (Local)</b> | 10/7/2021 9:13:35 AM (UTC+03:00)       | <b>Acquisition SW Version</b> | 6200 series TOF/6500 series Q-TOF B.08.00 (B8058.0) |
| <b>TOF Driver Version</b>       | 8.00.00                                | <b>TOF Firmware Version</b>   | 8.643                                               |
| <b>Tune Mass Range Max.</b>     | 1700                                   |                               |                                                     |

## Compound Table

| Label                       | Tgt Score | Mass Error (ppm) | Tgt Formula   | Obs. RT | Ref. Mass | Obs. Mass |
|-----------------------------|-----------|------------------|---------------|---------|-----------|-----------|
| Cpd 1: C23 H28 N4 O2; 2.293 | 92.3      | -2.2             | C23 H28 N4 O2 | 2.293   | 392.2212  | 392.2204  |

| Obs. m/z | Obs. RT | Obs. Mass | Tgt Formula   | Tgt Mass | Tgt Mass Error (ppm) | RT Diff.        | Find Cpd Algorithm |
|----------|---------|-----------|---------------|----------|----------------------|-----------------|--------------------|
| 393.2276 | 2.293   | 392.2204  | C23 H28 N4 O2 | 392.2212 | -2.2                 | Find By Formula |                    |

## Compound Chromatograms

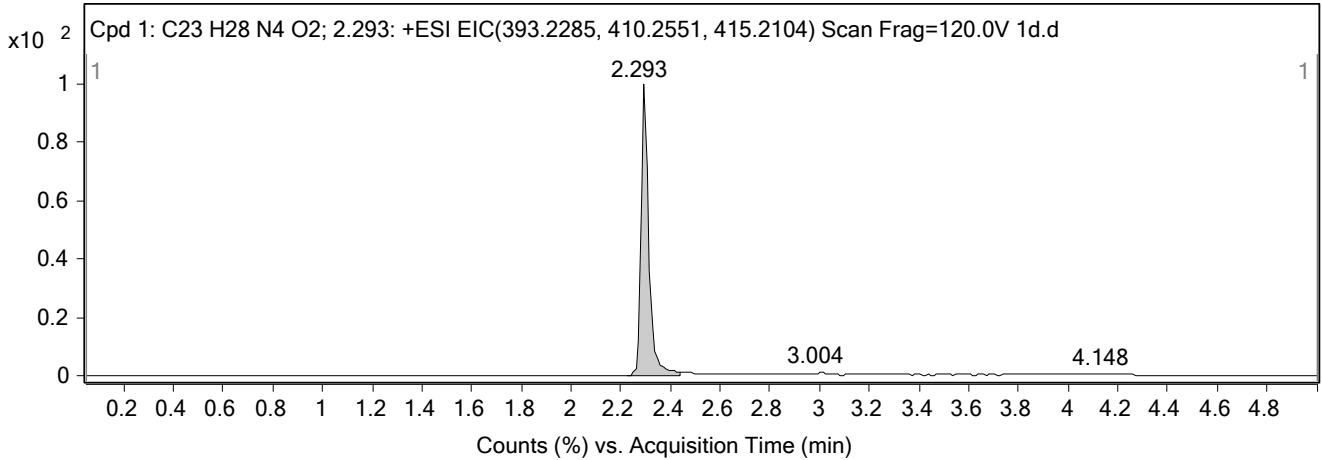

MS Zoomed Spectrum

# Target Compound Screening Report

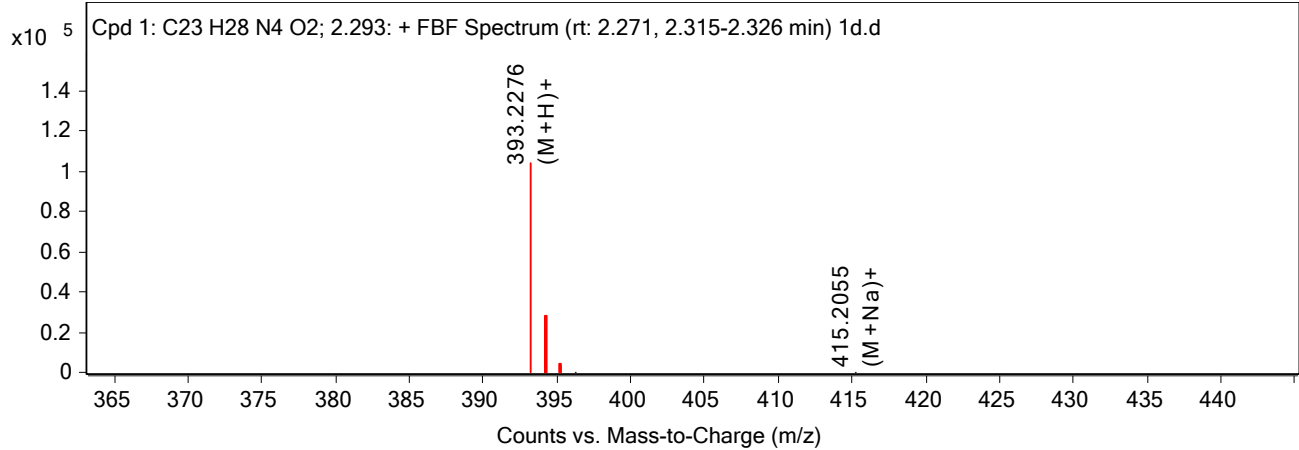

## MS Spectrum Peak List

| Obs. m/z | Charge | Abund     | Ion/Isotope |
|----------|--------|-----------|-------------|
| 393.2276 | 1      | 104005.23 | (M+H)+      |
| 394.2306 | 1      | 21882.24  | (M+H)+      |
| 395.2344 | 1      | 3139.41   | (M+H)+      |
| 396.2407 | 1      | 366.21    | (M+H)+      |
| 415.2055 | 1      | 137.82    | (M+Na)+     |

## MS Zoomed Spectrum

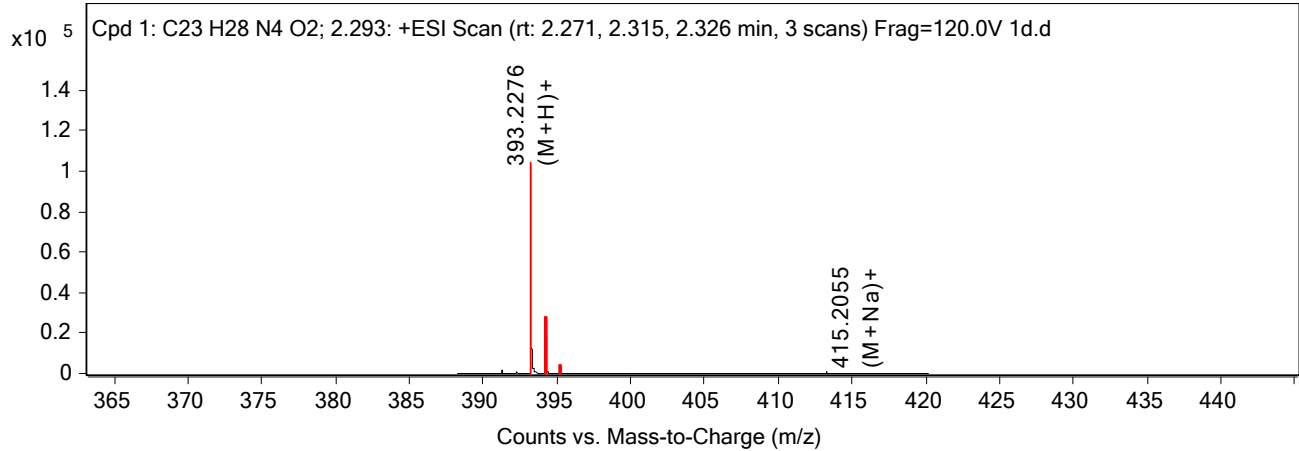

## MS Spectrum Peak List

| Obs. m/z | Charge | Abund     | Ion/Isotope | Tgt Mass Error (ppm) |
|----------|--------|-----------|-------------|----------------------|
| 393.2276 | 1      | 104005.24 | (M+H)+      | 2.25                 |
| 393.2276 |        | 104005.24 |             |                      |
| 394.2306 | 1      | 21882.24  | (M+H)+      | 2.4                  |
| 395.2344 | 1      | 3139.41   | (M+H)+      | -0.09                |
| 396.2407 | 1      | 366.21    | (M+H)+      | -9.15                |
| 415.2055 | 1      | 137.82    | (M+Na)+     | 11.81                |

--- End Of Report ---

# Target Compound Screening Report

|                                 |                                        |                               |                                                     |
|---------------------------------|----------------------------------------|-------------------------------|-----------------------------------------------------|
| <b>Data File</b>                | 1-2.d                                  | <b>Sample Name</b>            | H1682149                                            |
| <b>Sample Type</b>              | Sample                                 | <b>Position</b>               | P1-A1                                               |
| <b>Instrument Name</b>          | Instrument 1                           | <b>User Name</b>              | Denis V.Bylina                                      |
| <b>Acq Method</b>               | Fast_Gradient_HRMS_pos_Lock_08272019.m | <b>Acquired Time</b>          | 9/27/2021 3:34:45 PM (UTC+03:00)                    |
| <b>IRM Calibration Status</b>   | Success                                | <b>DA Method</b>              | 1.m                                                 |
| <b>Comment</b>                  |                                        |                               |                                                     |
| <b>Sample Group</b>             |                                        | <b>Info.</b>                  | Agilent 6224 TOF LC/MS                              |
| <b>MFC</b>                      | C21H22ClN5O                            | <b>Stream Name</b>            | LC 1                                                |
| <b>Acquisition Time (Local)</b> | 9/27/2021 3:34:45 PM (UTC+03:00)       | <b>Acquisition SW Version</b> | 6200 series TOF/6500 series Q-TOF B.08.00 (B8058.0) |
| <b>TOF Driver Version</b>       | 8.00.00                                | <b>TOF Firmware Version</b>   | 8.643                                               |
| <b>Tune Mass Range Max.</b>     | 1700                                   |                               |                                                     |

## Compound Table

| Label                         | Tgt Score | Mass Error (ppm) | Tgt Formula     | Obs. RT | Ref. Mass | Obs. Mass |
|-------------------------------|-----------|------------------|-----------------|---------|-----------|-----------|
| Cpd 1: C21 H22 Cl N5 O; 2.170 | 88.55     | -2.1             | C21 H22 Cl N5 O | 2.17    | 395.1513  | 395.1505  |

| Obs. m/z | Obs. RT | Obs. Mass | Tgt Formula     | Tgt Mass | Tgt Mass Error (ppm) | RT Diff.        | Find Cpd Algorithm |
|----------|---------|-----------|-----------------|----------|----------------------|-----------------|--------------------|
| 396.1577 | 2.17    | 395.1505  | C21 H22 Cl N5 O | 395.1513 | -2.1                 | Find By Formula |                    |

## Compound Chromatograms

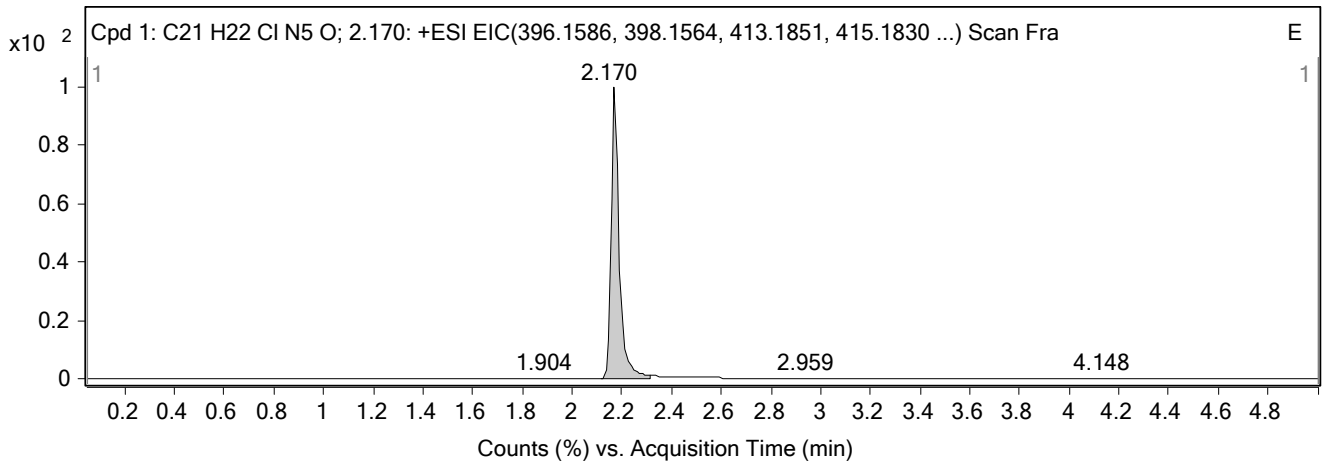

MS Zoomed Spectrum

# Target Compound Screening Report

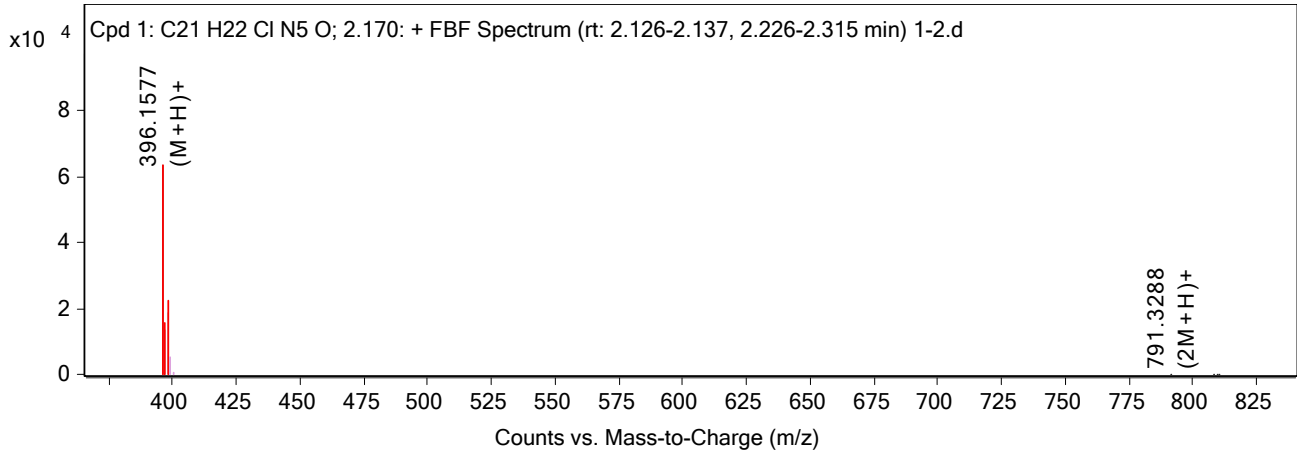

## MS Spectrum Peak List

| Obs. m/z | Charge | Abund    | Ion/Isotope            |
|----------|--------|----------|------------------------|
| 396.1577 | 1      | 63387.52 | (M+H)+                 |
| 397.1606 | 1      | 13470.55 | (M+H)+                 |
| 398.1555 | 1      | 19009.04 | (M+H)+                 |
| 791.3288 | 1      | 73.93    | (2M+H)+                |
| 808.3489 | 1      | 70.82    | (2M+NH <sub>4</sub> )+ |
| 809.3484 | 1      | 61.28    | (2M+NH <sub>4</sub> )+ |
| 810.3558 | 1      | 64.69    | (2M+NH <sub>4</sub> )+ |

## MS Zoomed Spectrum

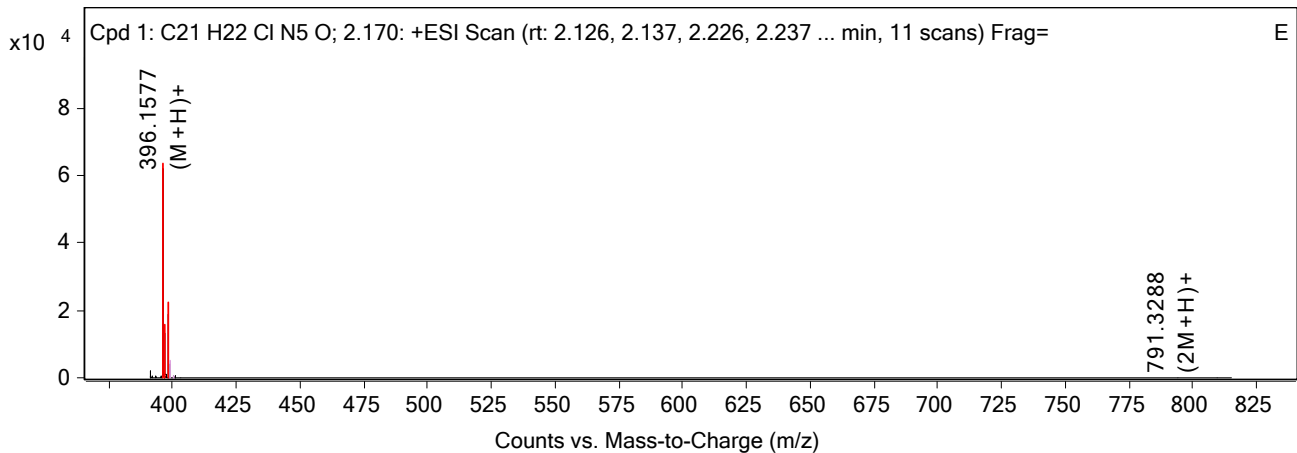

## MS Spectrum Peak List

| Obs. m/z | Charge | Abund    | Ion/Isotope            | Tgt Mass Error (ppm) |
|----------|--------|----------|------------------------|----------------------|
| 396.1577 | 1      | 63387.52 | (M+H)+                 | 2.2                  |
| 397.1606 | 1      | 13470.55 | (M+H)+                 | 2.25                 |
| 398.1555 | 1      | 19009.05 | (M+H)+                 | 2.19                 |
| 791.3288 | 1      | 73.93    | (2M+H)+                | -23.93               |
| 808.3489 | 1      | 70.82    | (2M+NH <sub>4</sub> )+ | -15.48               |
| 809.3484 | 1      | 61.28    | (2M+NH <sub>4</sub> )+ | -11.24               |
| 810.3558 | 1      | 64.69    | (2M+NH <sub>4</sub> )+ | -25.8                |

--- End Of Report ---

# Target Compound Screening Report

|                                 |                                        |                               |                                                     |
|---------------------------------|----------------------------------------|-------------------------------|-----------------------------------------------------|
| <b>Data File</b>                | 38.d                                   | <b>Sample Name</b>            | H1661315                                            |
| <b>Sample Type</b>              | Sample                                 | <b>Position</b>               | P1-E2                                               |
| <b>Instrument Name</b>          | Instrument 1                           | <b>User Name</b>              | Denis V.Bylina                                      |
| <b>Acq Method</b>               | Fast_Gradient_HRMS_pos_Lock_08272019.m | <b>Acquired Time</b>          | 9/23/2021 2:42:07 PM (UTC+03:00)                    |
| <b>IRM Calibration Status</b>   | Success                                | <b>DA Method</b>              | 1.m                                                 |
| <b>Comment</b>                  |                                        |                               |                                                     |
| <b>Sample Group</b>             |                                        | <b>Info.</b>                  | Agilent 6224 TOF LC/MS                              |
| <b>MFC</b>                      | C25H28ClN3O3                           | <b>Stream Name</b>            | LC 1                                                |
| <b>Acquisition Time (Local)</b> | 9/23/2021 2:42:07 PM (UTC+03:00)       | <b>Acquisition SW Version</b> | 6200 series TOF/6500 series Q-TOF B.08.00 (B8058.0) |
| <b>TOF Driver Version</b>       | 8.00.00                                | <b>TOF Firmware Version</b>   | 8.643                                               |
| <b>Tune Mass Range Max.</b>     | 1700                                   |                               |                                                     |

## Compound Table

| Label                          | Tgt Score | Mass Error (ppm) | Tgt Formula      | Obs. RT | Ref. Mass | Obs. Mass |
|--------------------------------|-----------|------------------|------------------|---------|-----------|-----------|
| Cpd 1: C25 H28 Cl N3 O3; 3.078 | 98.25     | -1.51            | C25 H28 Cl N3 O3 | 3.078   | 453.1819  | 453.1812  |

| Obs. m/z | Obs. RT | Obs. Mass | Tgt Formula      | Tgt Mass | Tgt Mass Error (ppm) | RT Diff.        | Find Cpds Algorithm |
|----------|---------|-----------|------------------|----------|----------------------|-----------------|---------------------|
| 929.3511 | 3.078   | 453.1812  | C25 H28 Cl N3 O3 | 453.1819 | -1.51                | Find By Formula |                     |

## Compound Chromatograms

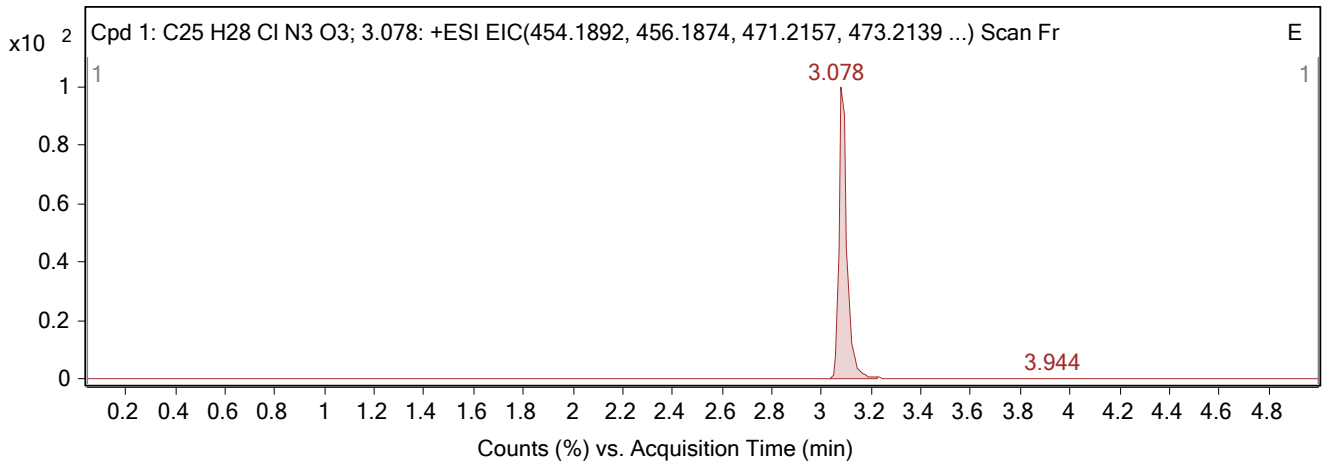

MS Zoomed Spectrum

# Target Compound Screening Report

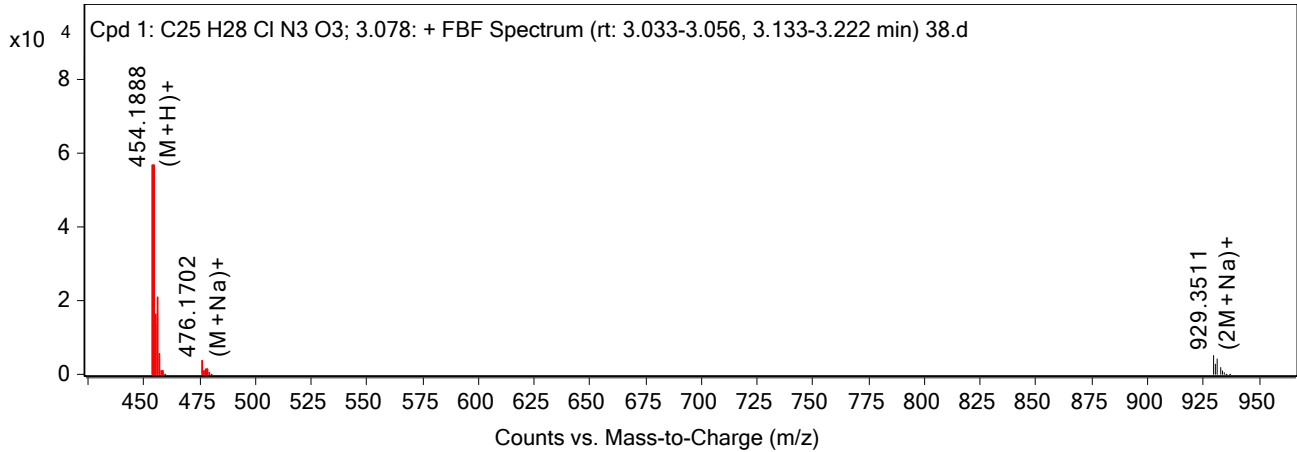

## MS Spectrum Peak List

| Obs. m/z | Charge | Abund    | Ion/Isotope |
|----------|--------|----------|-------------|
| 454.1888 | 1      | 56691.43 | (M+H)+      |
| 455.1918 | 1      | 13385.82 | (M+H)+      |
| 456.1866 | 1      | 17465.06 | (M+H)+      |
| 457.1889 | 1      | 4220.61  | (M+H)+      |
| 476.1702 | 1      | 3684.23  | (M+Na)+     |
| 478.1689 | 1      | 1243.53  | (M+Na)+     |
| 929.3511 | 1      | 5299.29  | (2M+Na)+    |
| 930.3554 | 1      | 2960.56  | (2M+Na)+    |
| 931.3509 | 1      | 4426.38  | (2M+Na)+    |
| 932.3529 | 1      | 2082.41  | (2M+Na)+    |

## MS Zoomed Spectrum

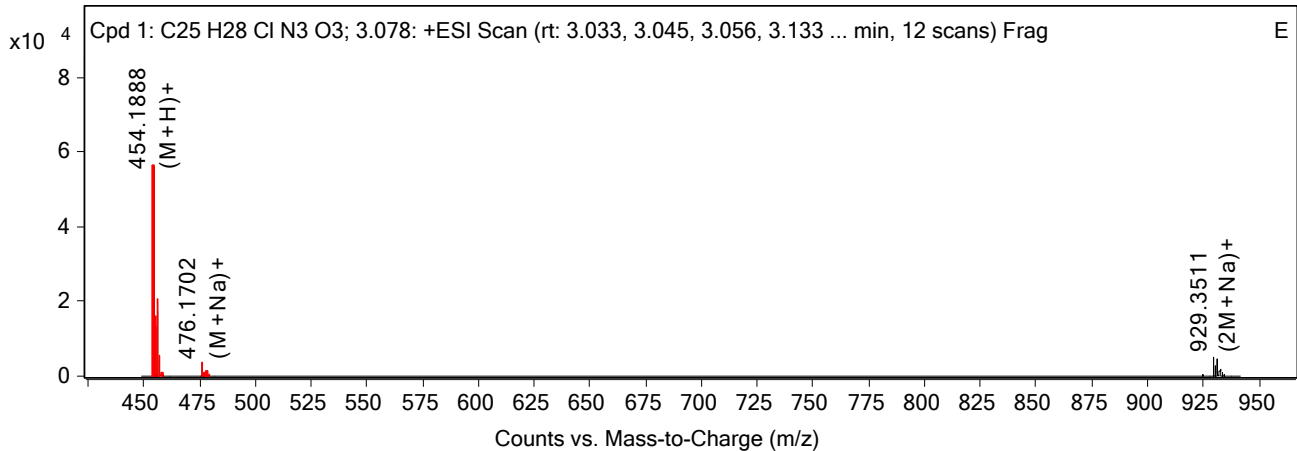

## MS Spectrum Peak List

| Obs. m/z | Charge | Abund    | Ion/Isotope | Tgt Mass Error (ppm) |
|----------|--------|----------|-------------|----------------------|
| 454.1888 | 1      | 56691.44 | (M+H)+      | 0.88                 |
| 455.1918 | 1      | 13385.82 | (M+H)+      | 1.21                 |
| 456.1866 | 1      | 17465.06 | (M+H)+      | 1.6                  |
| 457.1889 | 1      | 4220.61  | (M+H)+      | 2                    |
| 476.1702 | 1      | 3684.23  | (M+Na)+     | 1.98                 |
| 478.1689 | 1      | 1243.53  | (M+Na)+     | 0.94                 |
| 929.3511 | 1      | 5299.29  | (2M+Na)+    | 2.06                 |
| 930.3554 | 1      | 2960.56  | (2M+Na)+    | 0.89                 |
| 931.3509 | 1      | 4426.38  | (2M+Na)+    | 1.21                 |
| 932.3529 | 1      | 2082.41  | (2M+Na)+    | 1.22                 |

--- End Of Report ---

# Target Compound Screening Report

|                                 |                                        |                               |                                                     |
|---------------------------------|----------------------------------------|-------------------------------|-----------------------------------------------------|
| <b>Data File</b>                | 29.d                                   | <b>Sample Name</b>            | H1657343                                            |
| <b>Sample Type</b>              | Sample                                 | <b>Position</b>               | P1-D2                                               |
| <b>Instrument Name</b>          | Instrument 1                           | <b>User Name</b>              | Denis V.Bylina                                      |
| <b>Acq Method</b>               | Fast_Gradient_HRMS_pos_Lock_08272019.m | <b>Acquired Time</b>          | 9/23/2021 1:52:08 PM (UTC+03:00)                    |
| <b>IRM Calibration Status</b>   | Success                                | <b>DA Method</b>              | 1.m                                                 |
| <b>Comment</b>                  |                                        |                               |                                                     |
| <b>Sample Group</b>             |                                        | <b>Info.</b>                  | Agilent 6224 TOF LC/MS                              |
| <b>MFC</b>                      | C23H34N4O3S                            | <b>Stream Name</b>            | LC 1                                                |
| <b>Acquisition Time (Local)</b> | 9/23/2021 1:52:08 PM (UTC+03:00)       | <b>Acquisition SW Version</b> | 6200 series TOF/6500 series Q-TOF B.08.00 (B8058.0) |
| <b>TOF Driver Version</b>       | 8.00.00                                | <b>TOF Firmware Version</b>   | 8.643                                               |
| <b>Tune Mass Range Max.</b>     | 1700                                   |                               |                                                     |

## Compound Table

| Label                         | Tgt Score | Mass Error (ppm) | Tgt Formula     | Obs. RT | Ref. Mass | Obs. Mass |
|-------------------------------|-----------|------------------|-----------------|---------|-----------|-----------|
| Cpd 1: C23 H34 N4 O3 S; 3.273 | 97.6      | -0.89            | C23 H34 N4 O3 S | 3.273   | 446.2352  | 446.2348  |

| Obs. m/z | Obs. RT | Obs. Mass | Tgt Formula     | Tgt Mass | Tgt Mass Error (ppm) | RT Diff.        | Find Cpds Algorithm |
|----------|---------|-----------|-----------------|----------|----------------------|-----------------|---------------------|
| 469.224  | 3.273   | 446.2348  | C23 H34 N4 O3 S | 446.2352 | -0.89                | Find By Formula |                     |

## Compound Chromatograms

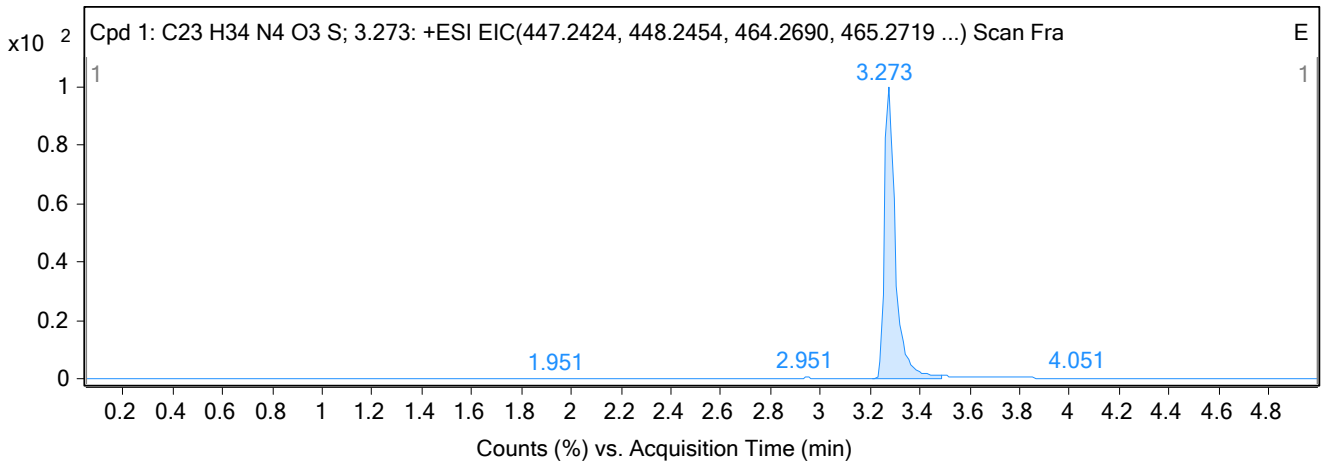

MS Zoomed Spectrum

# Target Compound Screening Report

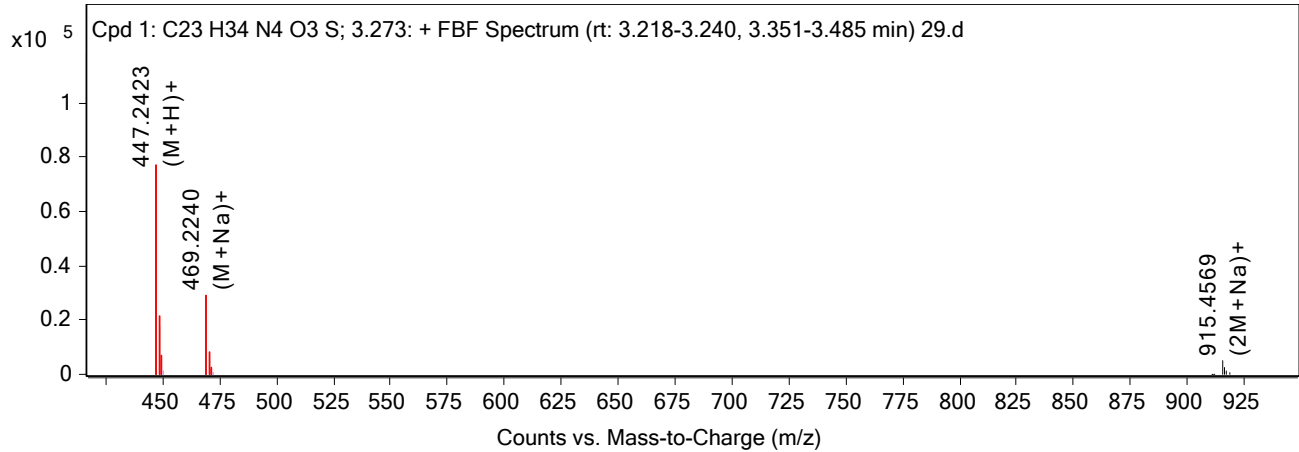

## MS Spectrum Peak List

| Obs. m/z | Charge | Abund    | Ion/Isotope |
|----------|--------|----------|-------------|
| 447.2423 | 1      | 76902.98 | (M+H)+      |
| 448.2451 | 1      | 17573.74 | (M+H)+      |
| 449.2438 | 1      | 5033.54  | (M+H)+      |
| 469.224  | 1      | 29269.54 | (M+Na)+     |
| 470.2267 | 1      | 7093.01  | (M+Na)+     |
| 471.2248 | 1      | 2186.25  | (M+Na)+     |
| 915.4569 | 1      | 5167.22  | (2M+Na)+    |
| 916.4596 | 1      | 2807.54  | (2M+Na)+    |
| 917.459  | 1      | 1271.82  | (2M+Na)+    |
| 918.4616 | 1      | 423.02   | (2M+Na)+    |

## MS Zoomed Spectrum

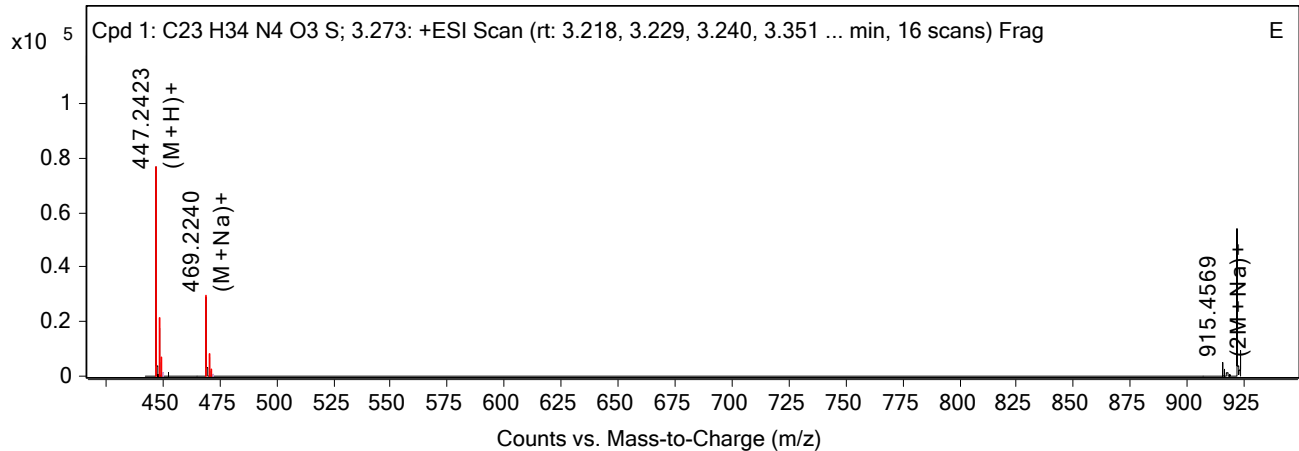

## MS Spectrum Peak List

| Obs. m/z | Charge | Abund    | Ion/Isotope | Tgt Mass Error (ppm) |
|----------|--------|----------|-------------|----------------------|
| 447.2423 | 1      | 76902.98 | (M+H)+      | 0.41                 |
| 448.2451 | 1      | 17573.74 | (M+H)+      | 0.59                 |
| 449.2438 | 1      | 5033.54  | (M+H)+      | -1.64                |
| 469.224  | 1      | 29269.54 | (M+Na)+     | 0.74                 |
| 470.2267 | 1      | 7093.01  | (M+Na)+     | 1.26                 |
| 471.2248 | 1      | 2186.25  | (M+Na)+     | 0.49                 |
| 915.4569 | 1      | 5167.22  | (2M+Na)+    | 2.85                 |
| 916.4596 | 1      | 2807.54  | (2M+Na)+    | 3.13                 |
| 917.459  | 1      | 1271.82  | (2M+Na)+    | 3.05                 |
| 918.4616 | 1      | 423.02   | (2M+Na)+    | 0.78                 |

--- End Of Report ---



# Target Compound Screening Report

|                                 |                                        |                               |                                                     |
|---------------------------------|----------------------------------------|-------------------------------|-----------------------------------------------------|
| <b>Data File</b>                | 43.d                                   | <b>Sample Name</b>            | H1661310                                            |
| <b>Sample Type</b>              | Sample                                 | <b>Position</b>               | P1-E7                                               |
| <b>Instrument Name</b>          | Instrument 1                           | <b>User Name</b>              | Denis V.Bylina                                      |
| <b>Acq Method</b>               | Fast_Gradient_HRMS_pos_Lock_08272019.m | <b>Acquired Time</b>          | 9/23/2021 3:09:53 PM (UTC+03:00)                    |
| <b>IRM Calibration Status</b>   | Success                                | <b>DA Method</b>              | 1.m                                                 |
| <b>Comment</b>                  |                                        |                               |                                                     |
| <b>Sample Group</b>             |                                        | <b>Info.</b>                  | Agilent 6224 TOF LC/MS                              |
| <b>MFC</b>                      | C25H22ClN3O3                           | <b>Stream Name</b>            | LC 1                                                |
| <b>Acquisition Time (Local)</b> | 9/23/2021 3:09:53 PM (UTC+03:00)       | <b>Acquisition SW Version</b> | 6200 series TOF/6500 series Q-TOF B.08.00 (B8058.0) |
| <b>TOF Driver Version</b>       | 8.00.00                                | <b>TOF Firmware Version</b>   | 8.643                                               |
| <b>Tune Mass Range Max.</b>     | 1700                                   |                               |                                                     |

## Compound Table

| Label                          | Tgt Score | Mass Error (ppm) | Tgt Formula      | Obs. RT | Ref. Mass | Obs. Mass |
|--------------------------------|-----------|------------------|------------------|---------|-----------|-----------|
| Cpd 1: C25 H22 Cl N3 O3; 2.819 | 95.45     | -1.18            | C25 H22 Cl N3 O3 | 2.819   | 447.135   | 447.1344  |

| Obs. m/z | Obs. RT | Obs. Mass | Tgt Formula      | Tgt Mass | Tgt Mass Error (ppm) | RT Diff.        | Find Cpd Algorithm |
|----------|---------|-----------|------------------|----------|----------------------|-----------------|--------------------|
| 470.1229 | 2.819   | 447.1344  | C25 H22 Cl N3 O3 | 447.135  | -1.18                | Find By Formula |                    |

## Compound Chromatograms

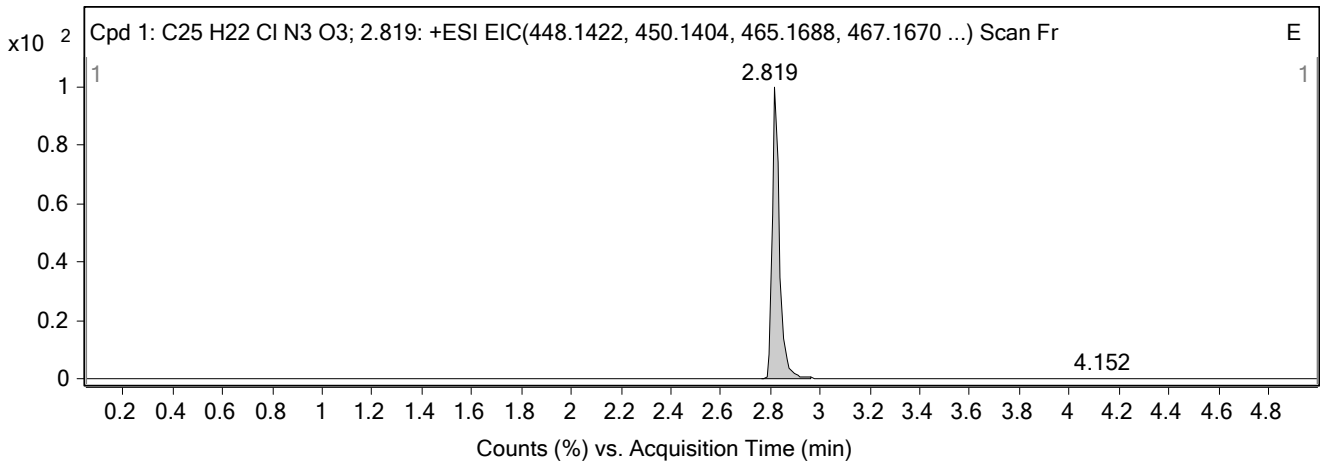

MS Zoomed Spectrum

# Target Compound Screening Report

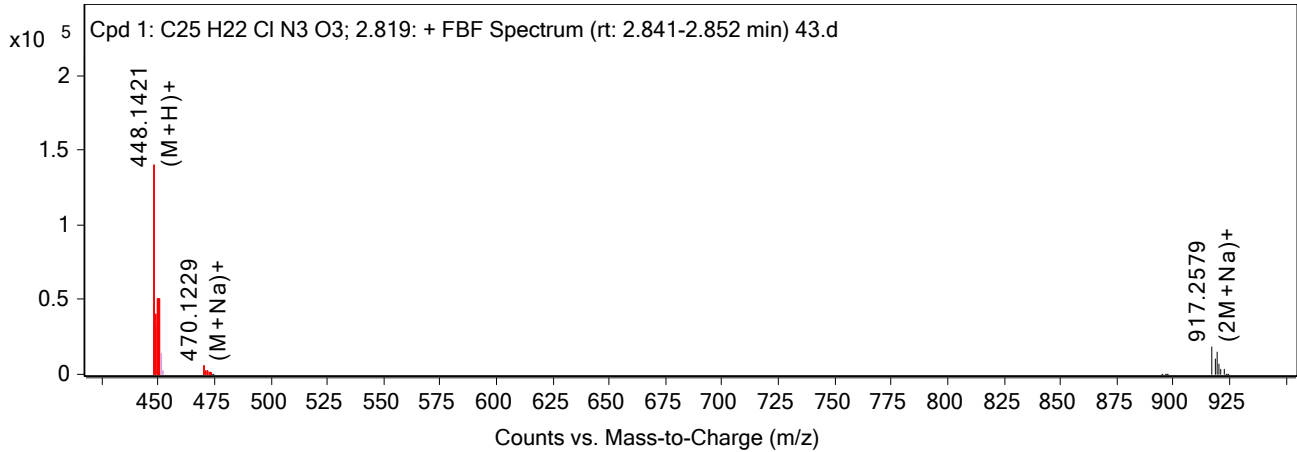

## MS Spectrum Peak List

| Obs. m/z | Charge | Abund     | Ion/Isotope |
|----------|--------|-----------|-------------|
| 448.1421 | 1      | 139812.81 | (M+H)+      |
| 449.1456 | 1      | 31859.01  | (M+H)+      |
| 450.1405 | 1      | 40511.06  | (M+H)+      |
| 470.1229 | 1      | 6258.92   | (M+Na)+     |
| 917.2579 | 1      | 18521.58  | (2M+Na)+    |
| 918.2601 | 1      | 10081.4   | (2M+Na)+    |
| 919.2567 | 1      | 14537.28  | (2M+Na)+    |
| 920.2583 | 1      | 6679.98   | (2M+Na)+    |
| 921.2569 | 1      | 3461.63   | (2M+Na)+    |
| 922.249  | 1      | 3013.06   | (2M+Na)+    |

## MS Zoomed Spectrum

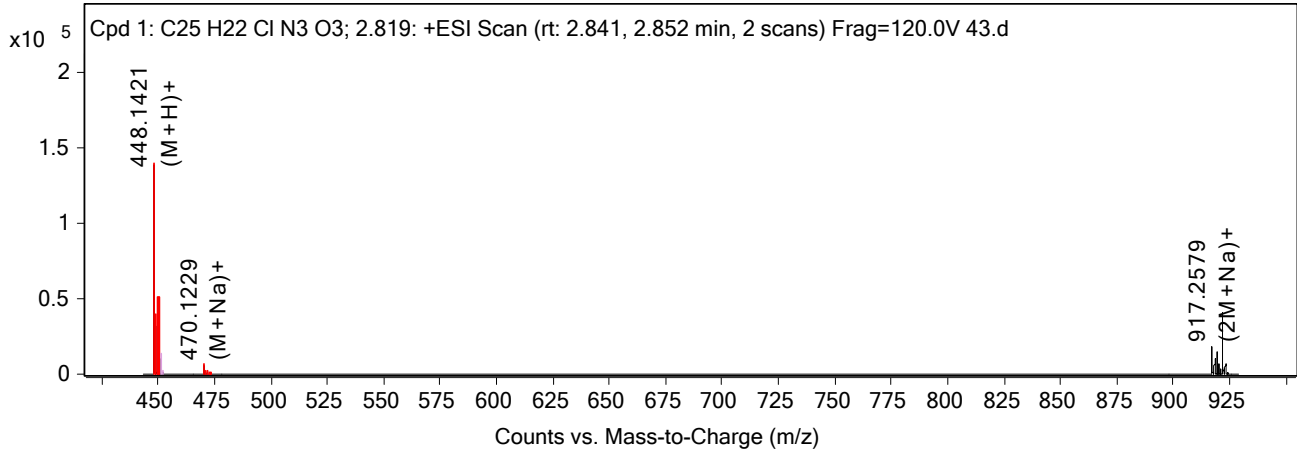

## MS Spectrum Peak List

| Obs. m/z | Charge | Abund     | Ion/Isotope | Tgt Mass Error (ppm) |
|----------|--------|-----------|-------------|----------------------|
| 448.1421 | 1      | 139812.82 | (M+H)+      | 0.24                 |
| 449.1456 | 1      | 31859.01  | (M+H)+      | -0.46                |
| 450.1405 | 1      | 40511.06  | (M+H)+      | -0.14                |
| 470.1229 | 1      | 6258.92   | (M+Na)+     | 2.83                 |
| 917.2579 | 1      | 18521.58  | (2M+Na)+    | 1.42                 |
| 918.2601 | 1      | 10081.4   | (2M+Na)+    | 2.38                 |
| 919.2567 | 1      | 14537.28  | (2M+Na)+    | 1.57                 |
| 920.2583 | 1      | 6679.98   | (2M+Na)+    | 2.02                 |
| 921.2569 | 1      | 3461.63   | (2M+Na)+    | 1.49                 |
| 922.249  | 1      | 3013.06   | (2M+Na)+    | 10.94                |

--- End Of Report ---

# Target Compound Screening Report

|                                 |                                        |                               |                                                     |
|---------------------------------|----------------------------------------|-------------------------------|-----------------------------------------------------|
| <b>Data File</b>                | 42.d                                   | <b>Sample Name</b>            | H1660424                                            |
| <b>Sample Type</b>              | Sample                                 | <b>Position</b>               | P1-E6                                               |
| <b>Instrument Name</b>          | Instrument 1                           | <b>User Name</b>              | Denis V.Bylina                                      |
| <b>Acq Method</b>               | Fast_Gradient_HRMS_pos_Lock_08272019.m | <b>Acquired Time</b>          | 9/23/2021 3:04:20 PM (UTC+03:00)                    |
| <b>IRM Calibration Status</b>   | Success                                | <b>DA Method</b>              | 1.m                                                 |
| <b>Comment</b>                  |                                        |                               |                                                     |
| <b>Sample Group</b>             |                                        | <b>Info.</b>                  | Agilent 6224 TOF LC/MS                              |
| <b>MFC</b>                      | C22H22ClN5O2                           | <b>Stream Name</b>            | LC 1                                                |
| <b>Acquisition Time (Local)</b> | 9/23/2021 3:04:20 PM (UTC+03:00)       | <b>Acquisition SW Version</b> | 6200 series TOF/6500 series Q-TOF B.08.00 (B8058.0) |
| <b>TOF Driver Version</b>       | 8.00.00                                | <b>TOF Firmware Version</b>   | 8.643                                               |
| <b>Tune Mass Range Max.</b>     | 1700                                   |                               |                                                     |

## Compound Table

| Label                          | Tgt Score | Mass Error (ppm) | Tgt Formula      | Obs. RT | Ref. Mass | Obs. Mass |
|--------------------------------|-----------|------------------|------------------|---------|-----------|-----------|
| Cpd 1: C22 H22 Cl N5 O2; 2.444 | 98.96     | -0.2             | C22 H22 Cl N5 O2 | 2.444   | 423.1462  | 423.1461  |

| Obs. m/z | Obs. RT | Obs. Mass | Tgt Formula      | Tgt Mass | Tgt Mass Error (ppm) | RT Diff.        | Find Cpds Algorithm |
|----------|---------|-----------|------------------|----------|----------------------|-----------------|---------------------|
| 446.1349 | 2.444   | 423.1461  | C22 H22 Cl N5 O2 | 423.1462 | -0.2                 | Find By Formula |                     |

## Compound Chromatograms

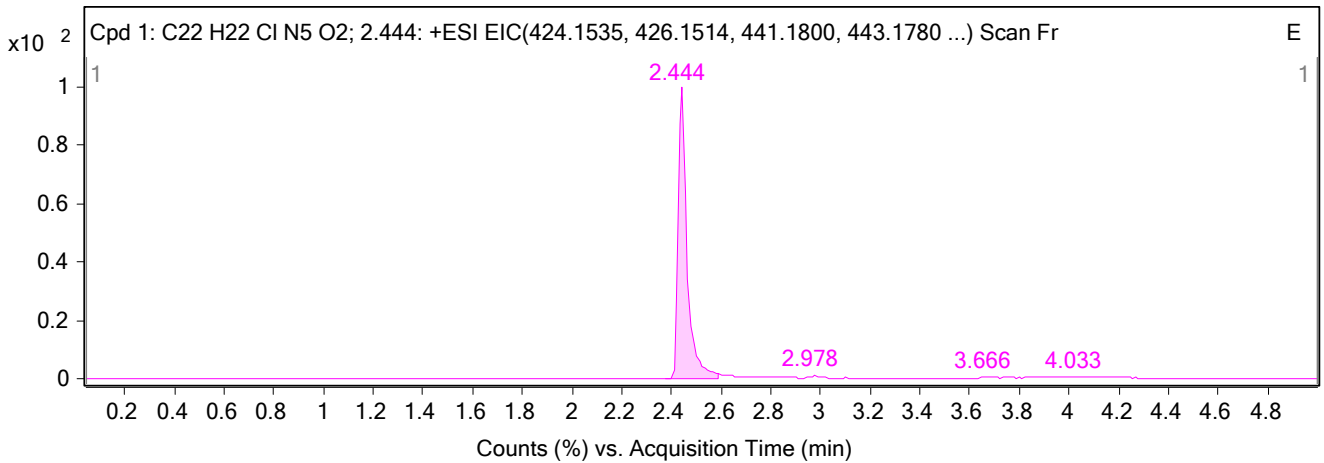

MS Zoomed Spectrum

# Target Compound Screening Report

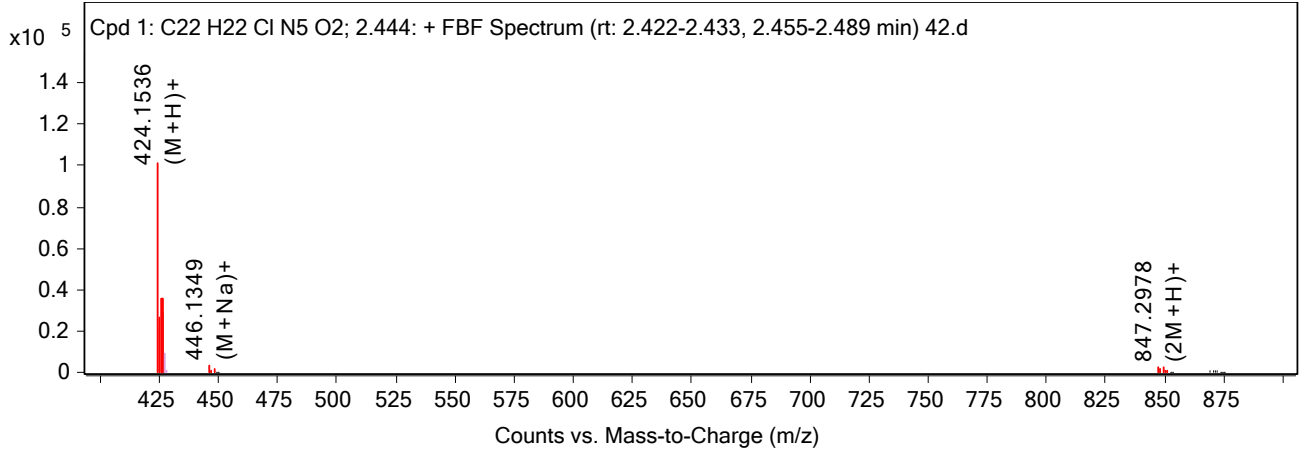

### MS Spectrum Peak List

| Obs. m/z | Charge | Abund    | Ion/Isotope |
|----------|--------|----------|-------------|
| 424.1536 | 1      | 100979.1 | (M+H)+      |
| 425.1563 | 1      | 21348.81 | (M+H)+      |
| 426.1514 | 1      | 29342.94 | (M+H)+      |
| 446.1349 | 1      | 3525.93  | (M+Na)+     |
| 448.1321 | 1      | 1187.77  | (M+Na)+     |
| 847.2978 | 1      | 2807.32  | (2M+H)+     |
| 848.3023 | 1      | 1451.27  | (2M+H)+     |
| 849.2975 | 1      | 2021     | (2M+H)+     |
| 869.2792 | 1      | 1281.22  | (2M+Na)+    |
| 871.2787 | 1      | 979.23   | (2M+Na)+    |

### MS Zoomed Spectrum

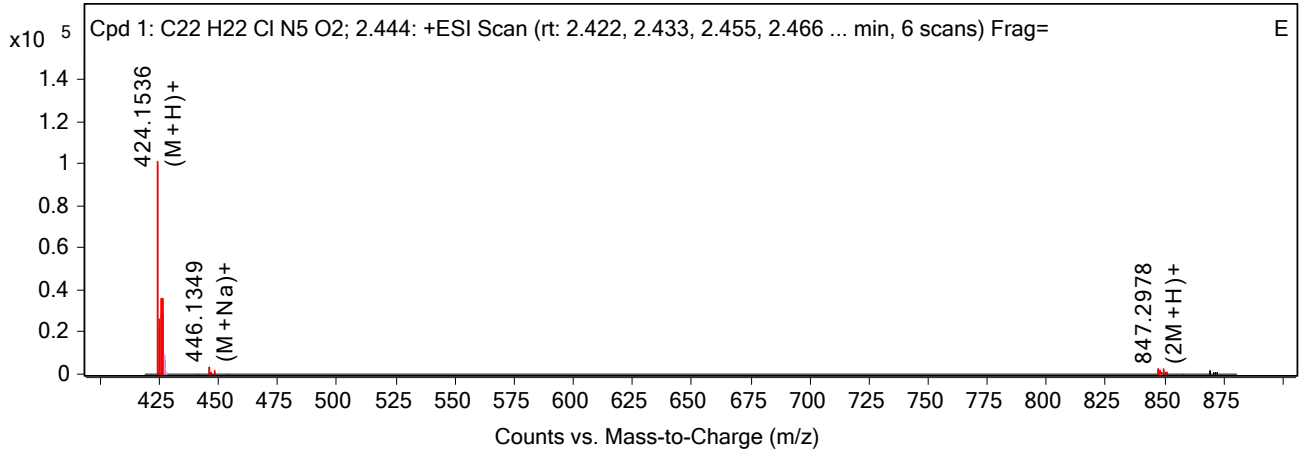

### MS Spectrum Peak List

| Obs. m/z | Charge | Abund    | Ion/Isotope | Tgt Mass Error (ppm) |
|----------|--------|----------|-------------|----------------------|
| 424.1536 | 1      | 100979.1 | (M+H)+      | -0.19                |
| 425.1563 | 1      | 21348.81 | (M+H)+      | 0.19                 |
| 426.1514 | 1      | 29342.94 | (M+H)+      | -0.08                |
| 446.1349 | 1      | 3525.93  | (M+Na)+     | 1.2                  |
| 448.1321 | 1      | 1187.77  | (M+Na)+     | 2.8                  |
| 847.2978 | 1      | 2807.32  | (2M+H)+     | 2.27                 |
| 848.3023 | 1      | 1451.27  | (2M+H)+     | 0.43                 |
| 849.2975 | 1      | 2021     | (2M+H)+     | 0.98                 |
| 869.2792 | 1      | 1281.22  | (2M+Na)+    | 2.77                 |
| 871.2787 | 1      | 979.23   | (2M+Na)+    | 1.81                 |

--- End Of Report ---

# Target Compound Screening Report

|                                 |                                        |                               |                                                     |
|---------------------------------|----------------------------------------|-------------------------------|-----------------------------------------------------|
| <b>Data File</b>                | 11.d                                   | <b>Sample Name</b>            | H3472156                                            |
| <b>Sample Type</b>              | Sample                                 | <b>Position</b>               | P1-B2                                               |
| <b>Instrument Name</b>          | Instrument 1                           | <b>User Name</b>              | Denis V.Bylina                                      |
| <b>Acq Method</b>               | Fast_Gradient_HRMS_pos_Lock_08272019.m | <b>Acquired Time</b>          | 10/5/2021 6:35:19 PM (UTC+03:00)                    |
| <b>IRM Calibration Status</b>   | Success                                | <b>DA Method</b>              | 1.m                                                 |
| <b>Comment</b>                  |                                        |                               |                                                     |
| <b>Sample Group</b>             |                                        | <b>Info.</b>                  | Agilent 6224 TOF LC/MS                              |
| <b>MFC</b>                      | C26H30N4O2                             | <b>Stream Name</b>            | LC 1                                                |
| <b>Acquisition Time (Local)</b> | 10/5/2021 6:35:19 PM (UTC+03:00)       | <b>Acquisition SW Version</b> | 6200 series TOF/6500 series Q-TOF B.08.00 (B8058.0) |
| <b>TOF Driver Version</b>       | 8.00.00                                | <b>TOF Firmware Version</b>   | 8.643                                               |
| <b>Tune Mass Range Max.</b>     | 1700                                   |                               |                                                     |

## Compound Table

| Label                       | Tgt Score | Mass Error (ppm) | Tgt Formula   | Obs. RT | Ref. Mass | Obs. Mass |
|-----------------------------|-----------|------------------|---------------|---------|-----------|-----------|
| Cpd 1: C26 H30 N4 O2; 2.462 | 95.67     | -1.8             | C26 H30 N4 O2 | 2.462   | 430.2369  | 430.2361  |

| Obs. m/z | Obs. RT | Obs. Mass | Tgt Formula   | Tgt Mass | Tgt Mass Error (ppm) | RT Diff.        | Find Cpds Algorithm |
|----------|---------|-----------|---------------|----------|----------------------|-----------------|---------------------|
| 431.2434 | 2.462   | 430.2361  | C26 H30 N4 O2 | 430.2369 | -1.8                 | Find By Formula |                     |

## Compound Chromatograms

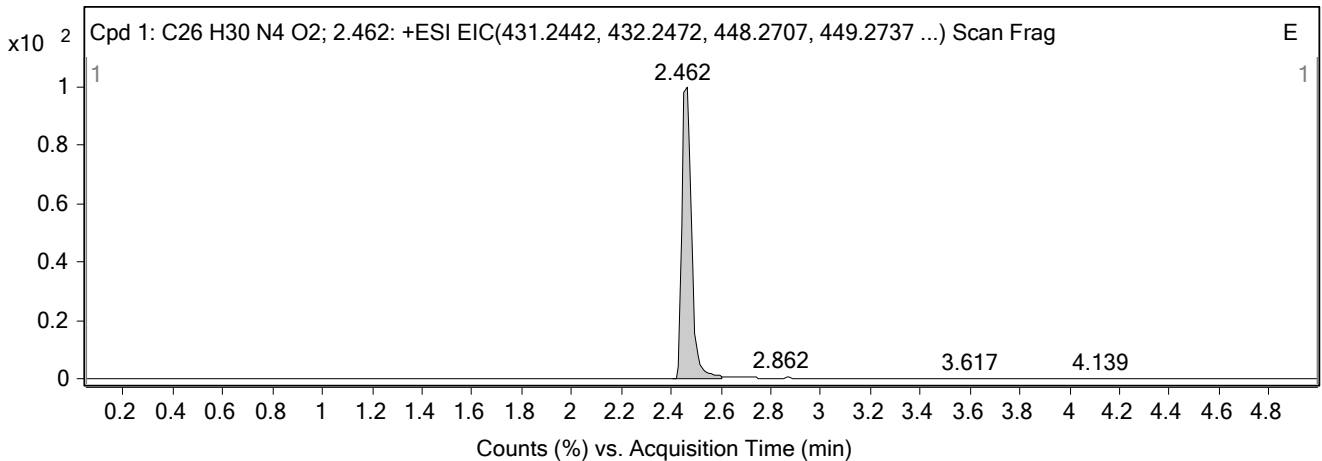

MS Zoomed Spectrum

# Target Compound Screening Report

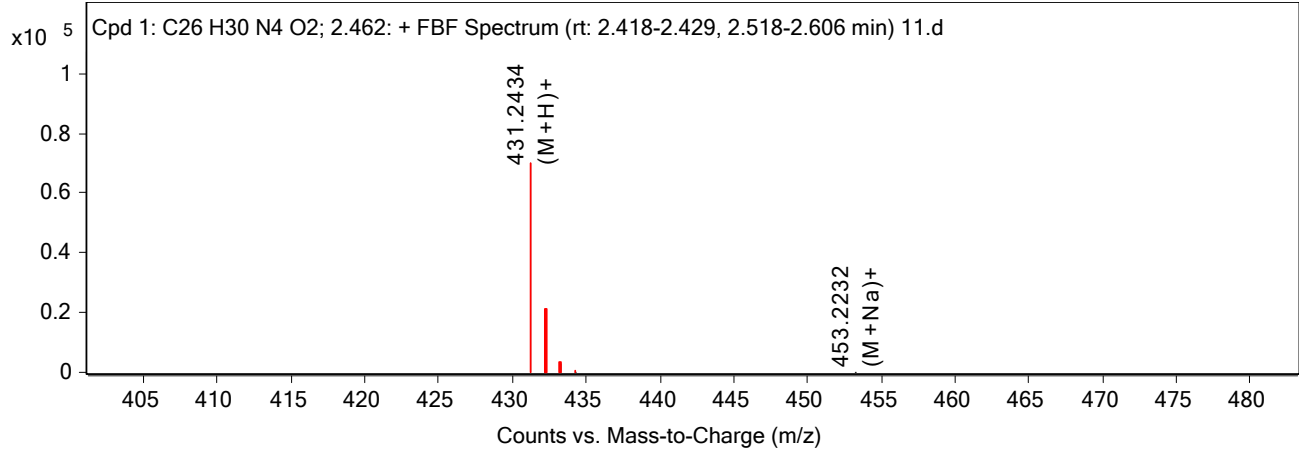

### MS Spectrum Peak List

| Obs. m/z | Charge | Abund    | Ion/Isotope |
|----------|--------|----------|-------------|
| 431.2434 | 1      | 69930.02 | (M+H)+      |
| 432.2464 | 1      | 18001.77 | (M+H)+      |
| 433.249  | 1      | 2654.52  | (M+H)+      |
| 434.2493 | 1      | 306.15   | (M+H)+      |
| 453.2232 | 1      | 132.72   | (M+Na)+     |

### MS Zoomed Spectrum

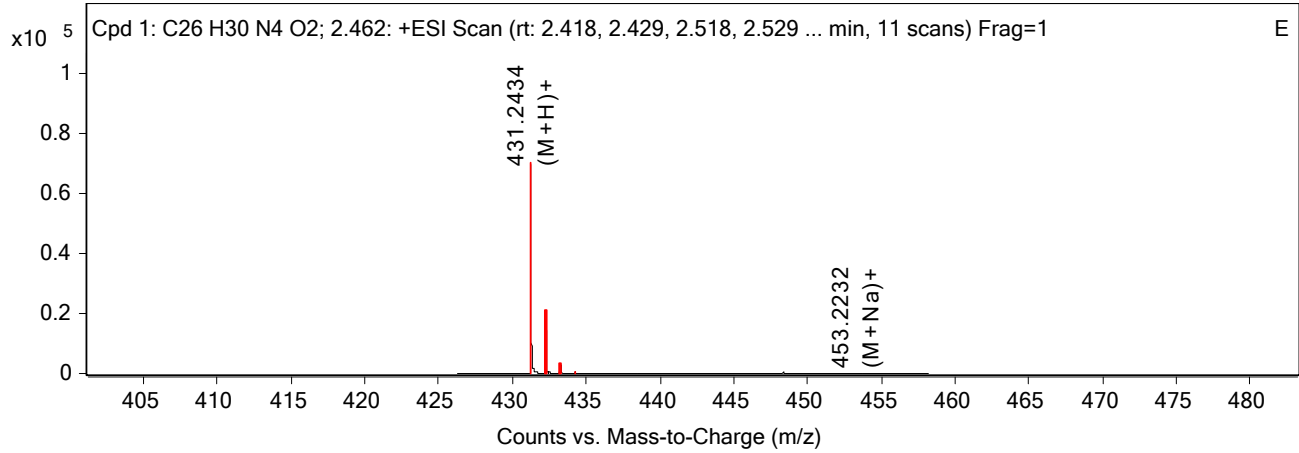

### MS Spectrum Peak List

| Obs. m/z | Charge | Abund    | Ion/Isotope | Tgt Mass Error (ppm) |
|----------|--------|----------|-------------|----------------------|
| 431.2434 | 1      | 69930.02 | (M+H)+      | 1.69                 |
| 432.2464 | 1      | 18001.77 | (M+H)+      | 1.91                 |
| 433.249  | 1      | 2654.52  | (M+H)+      | 2.68                 |
| 434.2493 | 1      | 306.15   | (M+H)+      | 8.43                 |
| 453.2232 | 1      | 132.72   | (M+Na)+     | 6.43                 |

--- End Of Report ---

# Target Compound Screening Report

|                                 |                                        |                               |                                                     |
|---------------------------------|----------------------------------------|-------------------------------|-----------------------------------------------------|
| <b>Data File</b>                | 22.d                                   | <b>Sample Name</b>            | H1666494                                            |
| <b>Sample Type</b>              | Sample                                 | <b>Position</b>               | P1-C4                                               |
| <b>Instrument Name</b>          | Instrument 1                           | <b>User Name</b>              | Denis V.Bylina                                      |
| <b>Acq Method</b>               | Fast_Gradient_HRMS_pos_Lock_08272019.m | <b>Acquired Time</b>          | 9/23/2021 1:13:15 PM (UTC+03:00)                    |
| <b>IRM Calibration Status</b>   | Success                                | <b>DA Method</b>              | 1.m                                                 |
| <b>Comment</b>                  |                                        |                               |                                                     |
| <b>Sample Group</b>             |                                        | <b>Info.</b>                  | Agilent 6224 TOF LC/MS                              |
| <b>MFC</b>                      | C26H30FN5O                             | <b>Stream Name</b>            | LC 1                                                |
| <b>Acquisition Time (Local)</b> | 9/23/2021 1:13:15 PM (UTC+03:00)       | <b>Acquisition SW Version</b> | 6200 series TOF/6500 series Q-TOF B.08.00 (B8058.0) |
| <b>TOF Driver Version</b>       | 8.00.00                                | <b>TOF Firmware Version</b>   | 8.643                                               |
| <b>Tune Mass Range Max.</b>     | 1700                                   |                               |                                                     |

## Compound Table

| Label                        | Tgt Score | Mass Error (ppm) | Tgt Formula    | Obs. RT | Ref. Mass | Obs. Mass |
|------------------------------|-----------|------------------|----------------|---------|-----------|-----------|
| Cpd 1: C26 H30 F N5 O; 1.952 | 97.05     | -0.96            | C26 H30 F N5 O | 1.952   | 447.2434  | 447.243   |

| Obs. m/z | Obs. RT | Obs. Mass | Tgt Formula    | Tgt Mass | Tgt Mass Error (ppm) | RT Diff.        | Find Cpd Algorithm |
|----------|---------|-----------|----------------|----------|----------------------|-----------------|--------------------|
| 448.2503 | 1.952   | 447.243   | C26 H30 F N5 O | 447.2434 | -0.96                | Find By Formula |                    |

## Compound Chromatograms

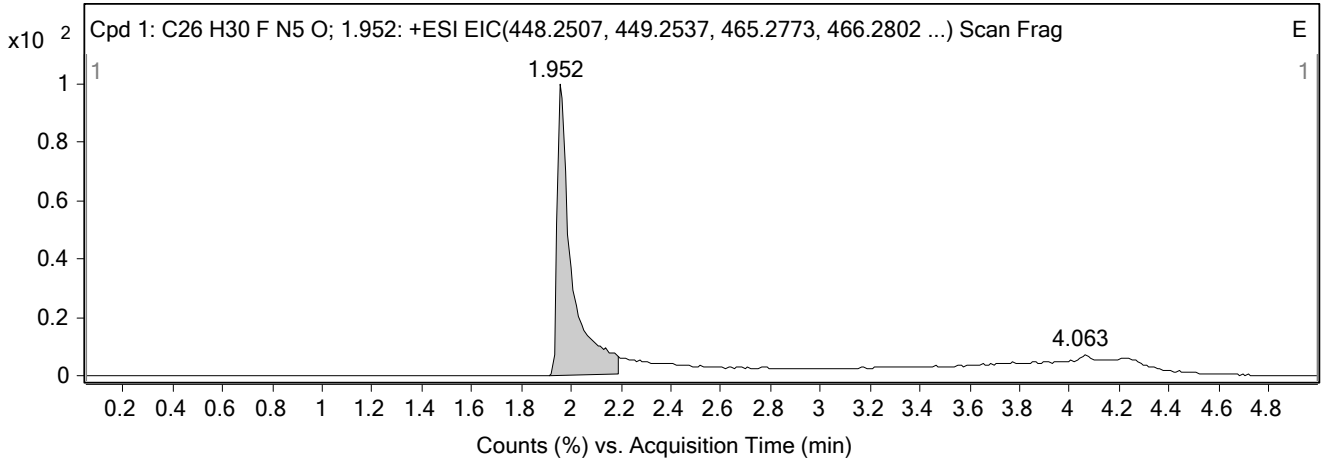

MS Zoomed Spectrum

# Target Compound Screening Report

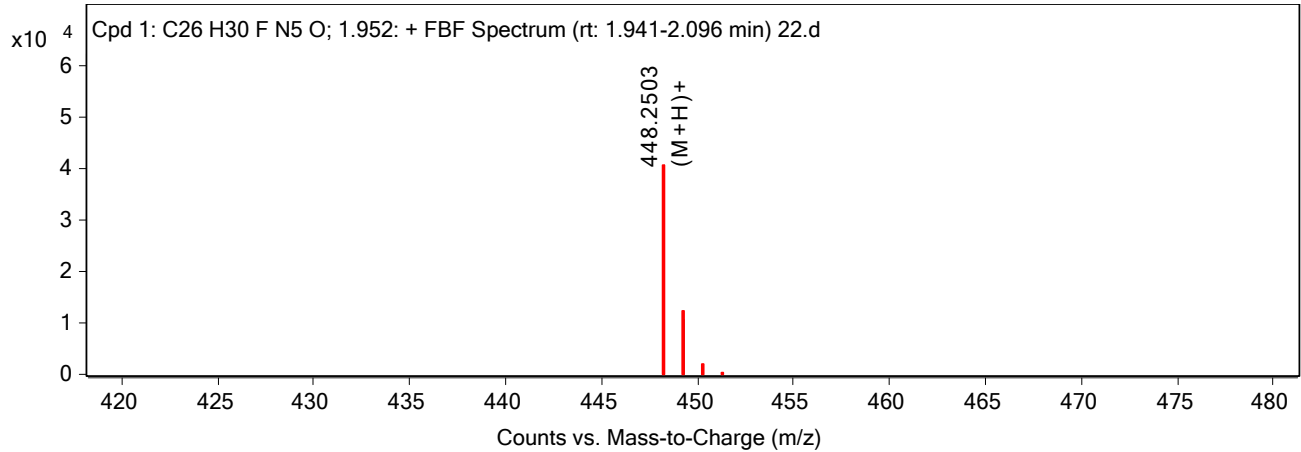

## MS Spectrum Peak List

| Obs. m/z | Charge | Abund    | Ion/Isotope |
|----------|--------|----------|-------------|
| 448.2503 | 1      | 40752.52 | (M+H)+      |
| 449.2532 | 1      | 10668.18 | (M+H)+      |
| 450.2559 | 1      | 1490.55  | (M+H)+      |
| 451.2574 | 1      | 165.26   | (M+H)+      |

## MS Zoomed Spectrum

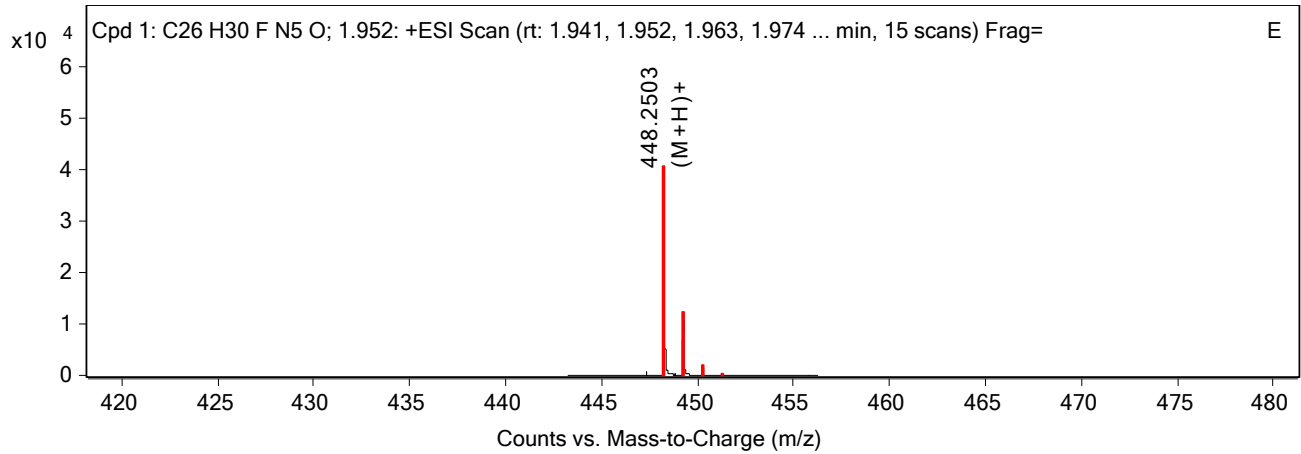

## MS Spectrum Peak List

| Obs. m/z | Charge | Abund    | Ion/Isotope | Tgt Mass Error (ppm) |
|----------|--------|----------|-------------|----------------------|
| 448.2503 | 1      | 40752.52 | (M+H)+      | 0.86                 |
| 448.2503 | 1      | 40752.52 | (M+H)+      |                      |
| 449.2532 | 1      | 10668.18 | (M+H)+      | 1.19                 |
| 450.2559 | 1      | 1490.55  | (M+H)+      | 1.65                 |
| 451.2574 | 1      | 165.26   | (M+H)+      | 4.55                 |

--- End Of Report ---



# Target Compound Screening Report

|                                 |                                        |                               |                                                     |
|---------------------------------|----------------------------------------|-------------------------------|-----------------------------------------------------|
| <b>Data File</b>                | 10.d                                   | <b>Sample Name</b>            | H3464504                                            |
| <b>Sample Type</b>              | Sample                                 | <b>Position</b>               | P1-B1                                               |
| <b>Instrument Name</b>          | Instrument 1                           | <b>User Name</b>              | Denis V.Bylina                                      |
| <b>Acq Method</b>               | Fast_Gradient_HRMS_pos_Lock_08272019.m | <b>Acquired Time</b>          | 10/5/2021 6:29:46 PM (UTC+03:00)                    |
| <b>IRM Calibration Status</b>   | Success                                | <b>DA Method</b>              | 1.m                                                 |
| <b>Comment</b>                  |                                        |                               |                                                     |
| <b>Sample Group</b>             |                                        | <b>Info.</b>                  | Agilent 6224 TOF LC/MS                              |
| <b>MFC</b>                      | C21H21ClN4O3S                          | <b>Stream Name</b>            | LC 1                                                |
| <b>Acquisition Time (Local)</b> | 10/5/2021 6:29:46 PM (UTC+03:00)       | <b>Acquisition SW Version</b> | 6200 series TOF/6500 series Q-TOF B.08.00 (B8058.0) |
| <b>TOF Driver Version</b>       | 8.00.00                                | <b>TOF Firmware Version</b>   | 8.643                                               |
| <b>Tune Mass Range Max.</b>     | 1700                                   |                               |                                                     |

## Compound Table

| Label                               | Tgt Score | Mass Error (ppm) | Tgt Formula        | Obs. RT | Ref. Mass | Obs. Mass |
|-------------------------------------|-----------|------------------|--------------------|---------|-----------|-----------|
| Cpd 1: C21 H21 Cl N4 O3 S;<br>2.766 | 94.84     | -2.01            | C21 H21 Cl N4 O3 S | 2.766   | 444.1023  | 444.1014  |

| Obs. m/z | Obs. RT | Obs. Mass | Tgt Formula        | Tgt Mass | Tgt Mass Error (ppm) | RT Diff.        | Find Cpd Algorithm |
|----------|---------|-----------|--------------------|----------|----------------------|-----------------|--------------------|
| 445.1086 | 2.766   | 444.1014  | C21 H21 Cl N4 O3 S | 444.1023 | -2.01                | Find By Formula |                    |

## Compound Chromatograms

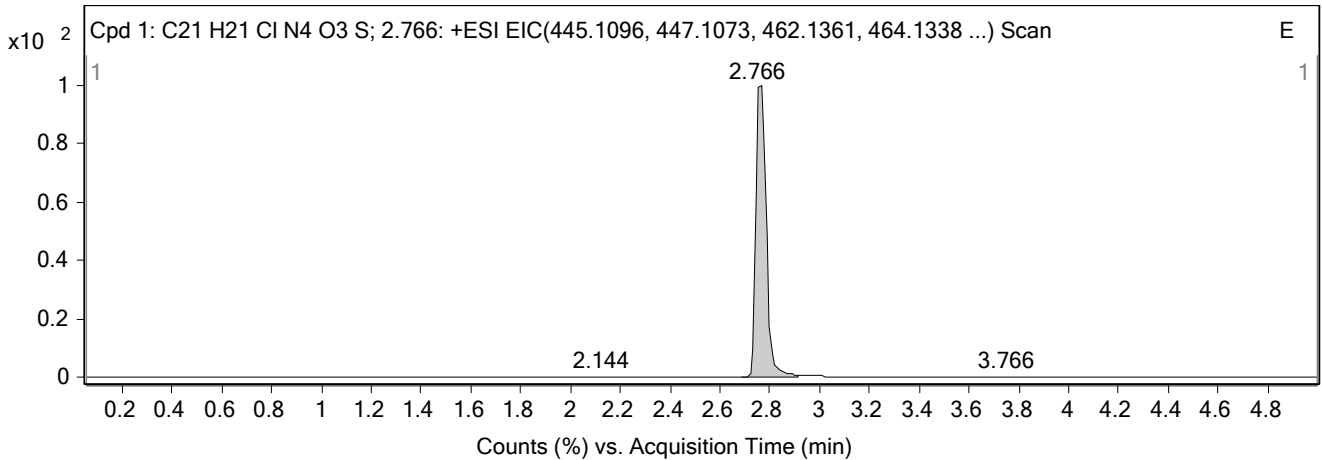

MS Zoomed Spectrum

# Target Compound Screening Report

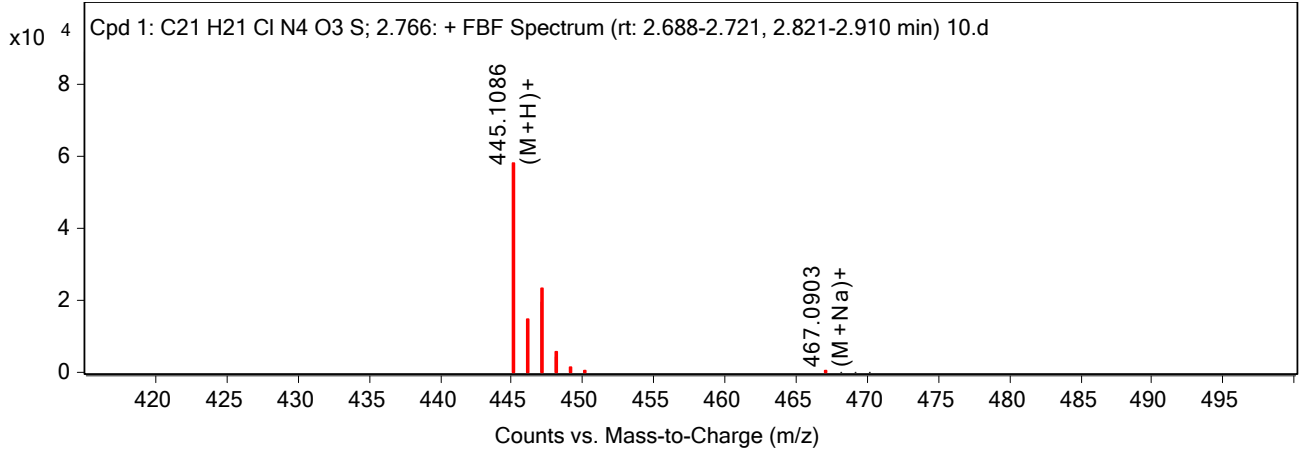

## MS Spectrum Peak List

| Obs. m/z | Charge | Abund    | Ion/Isotope |
|----------|--------|----------|-------------|
| 445.1086 | 1      | 57880.9  | (M+H)+      |
| 446.1117 | 1      | 12194    | (M+H)+      |
| 447.1063 | 1      | 19513.03 | (M+H)+      |
| 448.1088 | 1      | 4306.13  | (M+H)+      |
| 449.1072 | 1      | 1151.96  | (M+H)+      |
| 450.1085 | 1      | 220.05   | (M+H)+      |
| 467.0903 | 1      | 381.84   | (M+Na)+     |
| 468.0949 | 1      | 111.9    | (M+Na)+     |
| 469.0875 | 1      | 178.43   | (M+Na)+     |
| 470.0909 | 1      | 56.46    | (M+Na)+     |

## MS Zoomed Spectrum

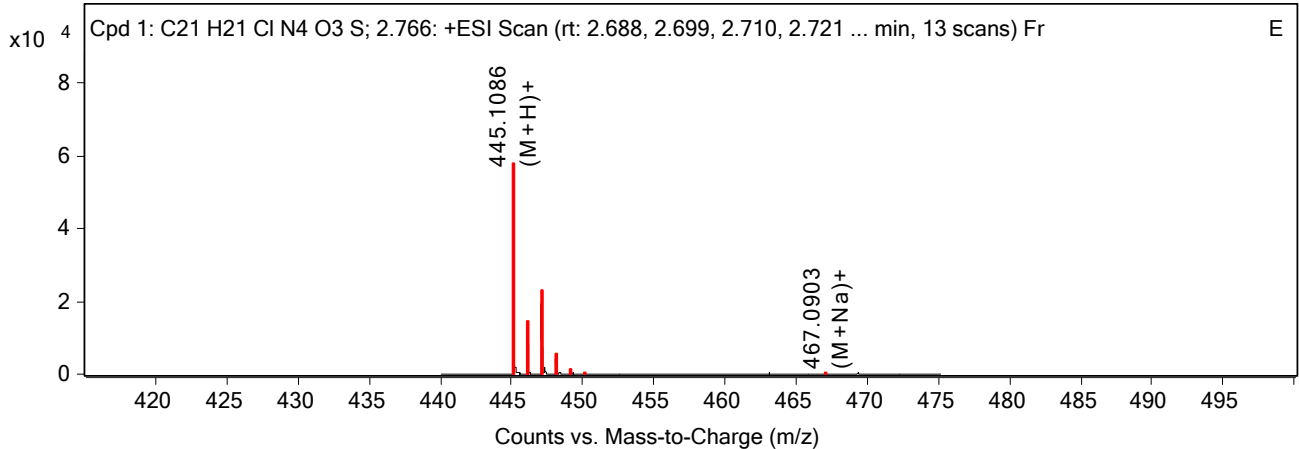

## MS Spectrum Peak List

| Obs. m/z | Charge | Abund    | Ion/Isotope | Tgt Mass Error (ppm) |
|----------|--------|----------|-------------|----------------------|
| 445.1086 | 1      | 57880.9  | (M+H)+      | 2.07                 |
| 446.1117 | 1      | 12194    | (M+H)+      | 1.72                 |
| 447.1063 | 1      | 19513.03 | (M+H)+      | 2.07                 |
| 448.1088 | 1      | 4306.13  | (M+H)+      | 2.14                 |
| 449.1072 | 1      | 1151.96  | (M+H)+      | 0                    |
| 450.1085 | 1      | 220.05   | (M+H)+      | -0.87                |
| 467.0903 | 1      | 381.84   | (M+Na)+     | 2.62                 |
| 468.0949 | 1      | 111.9    | (M+Na)+     | -1.12                |
| 469.0875 | 1      | 178.43   | (M+Na)+     | 3.67                 |
| 470.0909 | 1      | 56.46    | (M+Na)+     | 1.57                 |

--- End Of Report ---

# Target Compound Screening Report

|                                 |                                        |                               |                                                     |
|---------------------------------|----------------------------------------|-------------------------------|-----------------------------------------------------|
| <b>Data File</b>                | 25.d                                   | <b>Sample Name</b>            | H1657378                                            |
| <b>Sample Type</b>              | Sample                                 | <b>Position</b>               | P1-C7                                               |
| <b>Instrument Name</b>          | Instrument 1                           | <b>User Name</b>              | Denis V.Bylina                                      |
| <b>Acq Method</b>               | Fast_Gradient_HRMS_pos_Lock_08272019.m | <b>Acquired Time</b>          | 9/23/2021 1:29:56 PM (UTC+03:00)                    |
| <b>IRM Calibration Status</b>   | Success                                | <b>DA Method</b>              | 1.m                                                 |
| <b>Comment</b>                  |                                        |                               |                                                     |
| <b>Sample Group</b>             |                                        | <b>Info.</b>                  | Agilent 6224 TOF LC/MS                              |
| <b>MFC</b>                      | C22H27N5O4S2                           | <b>Stream Name</b>            | LC 1                                                |
| <b>Acquisition Time (Local)</b> | 9/23/2021 1:29:56 PM (UTC+03:00)       | <b>Acquisition SW Version</b> | 6200 series TOF/6500 series Q-TOF B.08.00 (B8058.0) |
| <b>TOF Driver Version</b>       | 8.00.00                                | <b>TOF Firmware Version</b>   | 8.643                                               |
| <b>Tune Mass Range Max.</b>     | 1700                                   |                               |                                                     |

## Compound Table

| Label                          | Tgt Score | Mass Error (ppm) | Tgt Formula      | Obs. RT | Ref. Mass | Obs. Mass |
|--------------------------------|-----------|------------------|------------------|---------|-----------|-----------|
| Cpd 1: C22 H27 N5 O4 S2; 2.618 | 94.49     | -1.07            | C22 H27 N5 O4 S2 | 2.618   | 489.1504  | 489.1499  |

| Obs. m/z | Obs. RT | Obs. Mass | Tgt Formula      | Tgt Mass | Tgt Mass Error (ppm) | RT Diff.        | Find Cpds Algorithm |
|----------|---------|-----------|------------------|----------|----------------------|-----------------|---------------------|
| 490.1574 | 2.618   | 489.1499  | C22 H27 N5 O4 S2 | 489.1504 | -1.07                | Find By Formula |                     |

## Compound Chromatograms

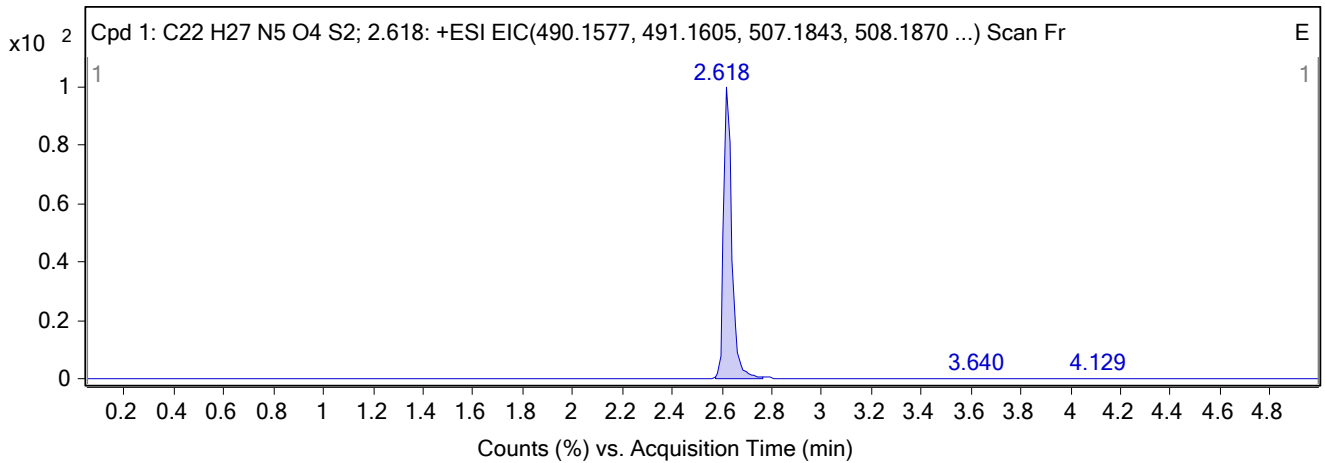

MS Zoomed Spectrum

# Target Compound Screening Report

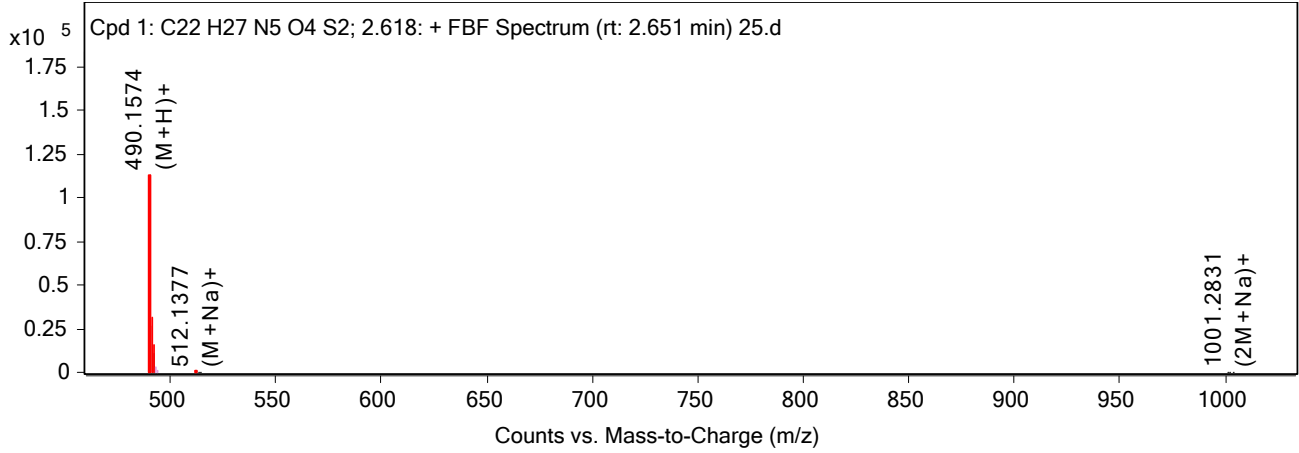

### MS Spectrum Peak List

| Obs. m/z  | Charge | Abund     | Ion/Isotope |
|-----------|--------|-----------|-------------|
| 490.1574  | 1      | 113003.87 | (M+H)+      |
| 491.1598  | 1      | 26144.04  | (M+H)+      |
| 492.1556  | 1      | 11181.79  | (M+H)+      |
| 512.1377  | 1      | 890.04    | (M+Na)+     |
| 513.1442  | 1      | 331.03    | (M+Na)+     |
| 514.1262  | 1      | 173.09    | (M+Na)+     |
| 1001.2831 | 1      | 134.64    | (2M+Na)+    |
| 1002.2734 | 1      | 99.56     | (2M+Na)+    |
| 1003.2684 | 1      | 49.13     | (2M+Na)+    |

### MS Zoomed Spectrum

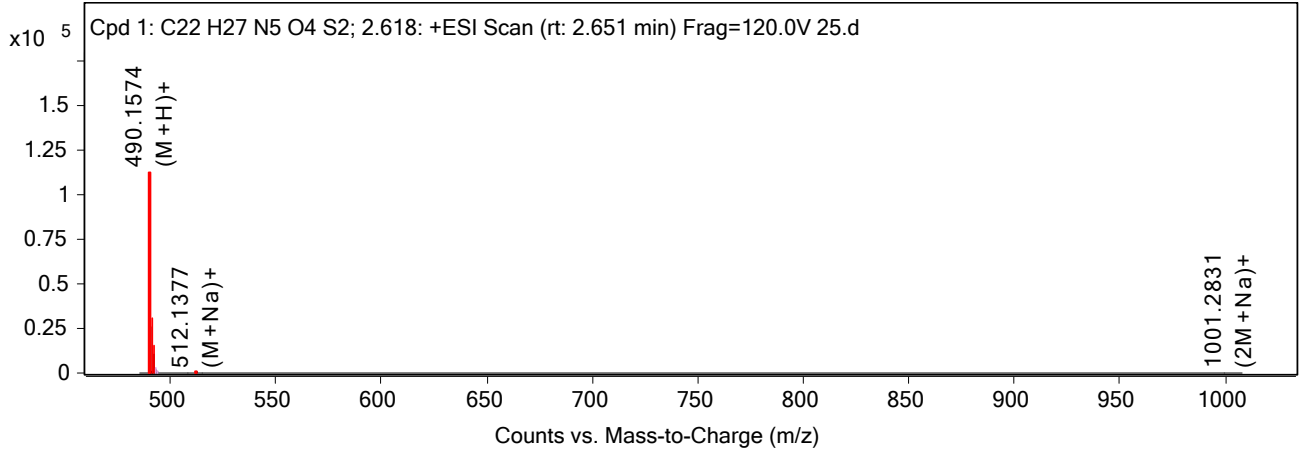

### MS Spectrum Peak List

| Obs. m/z  | Charge | Abund     | Ion/Isotope | Tgt Mass Error (ppm) |
|-----------|--------|-----------|-------------|----------------------|
| 490.1574  | 1      | 113003.87 | (M+H)+      | 0.74                 |
| 491.1598  | 1      | 26144.04  | (M+H)+      | 1.45                 |
| 492.1556  | 1      | 11181.79  | (M+H)+      | 2.3                  |
| 512.1377  | 1      | 890.04    | (M+Na)+     | 3.91                 |
| 513.1442  | 1      | 331.03    | (M+Na)+     | -3.55                |
| 514.1262  | 1      | 173.09    | (M+Na)+     | 24.16                |
| 1001.2831 | 1      | 134.64    | (2M+Na)+    | 7.03                 |
| 1002.2734 | 1      | 99.56     | (2M+Na)+    | 19.43                |
| 1003.2684 | 1      | 49.13     | (2M+Na)+    | 22.04                |

--- End Of Report ---

# Target Compound Screening Report

|                                 |                                        |                               |                                                     |
|---------------------------------|----------------------------------------|-------------------------------|-----------------------------------------------------|
| <b>Data File</b>                | 30.d                                   | <b>Sample Name</b>            | H1660632                                            |
| <b>Sample Type</b>              | Sample                                 | <b>Position</b>               | P1-D3                                               |
| <b>Instrument Name</b>          | Instrument 1                           | <b>User Name</b>              | Denis V.Bylina                                      |
| <b>Acq Method</b>               | Fast_Gradient_HRMS_pos_Lock_08272019.m | <b>Acquired Time</b>          | 9/23/2021 1:57:42 PM (UTC+03:00)                    |
| <b>IRM Calibration Status</b>   | Success                                | <b>DA Method</b>              | 1.m                                                 |
| <b>Comment</b>                  |                                        |                               |                                                     |
| <b>Sample Group</b>             |                                        | <b>Info.</b>                  | Agilent 6224 TOF LC/MS                              |
| <b>MFC</b>                      | C21H21F3N4O4S                          | <b>Stream Name</b>            | LC 1                                                |
| <b>Acquisition Time (Local)</b> | 9/23/2021 1:57:42 PM (UTC+03:00)       | <b>Acquisition SW Version</b> | 6200 series TOF/6500 series Q-TOF B.08.00 (B8058.0) |
| <b>TOF Driver Version</b>       | 8.00.00                                | <b>TOF Firmware Version</b>   | 8.643                                               |
| <b>Tune Mass Range Max.</b>     | 1700                                   |                               |                                                     |

## Compound Table

| Label                               | Tgt Score | Mass Error (ppm) | Tgt Formula        | Obs. RT | Ref. Mass | Obs. Mass |
|-------------------------------------|-----------|------------------|--------------------|---------|-----------|-----------|
| Cpd 1: C21 H21 F3 N4 O4 S;<br>2.291 | 98.11     | -1.17            | C21 H21 F3 N4 O4 S | 2.291   | 482.1236  | 482.123   |

| Obs. m/z | Obs. RT | Obs. Mass | Tgt Formula        | Tgt Mass | Tgt Mass Error (ppm) | RT Diff.        | Find Cpd Algorithm |
|----------|---------|-----------|--------------------|----------|----------------------|-----------------|--------------------|
| 505.1115 | 2.291   | 482.123   | C21 H21 F3 N4 O4 S | 482.1236 | -1.17                | Find By Formula |                    |

## Compound Chromatograms

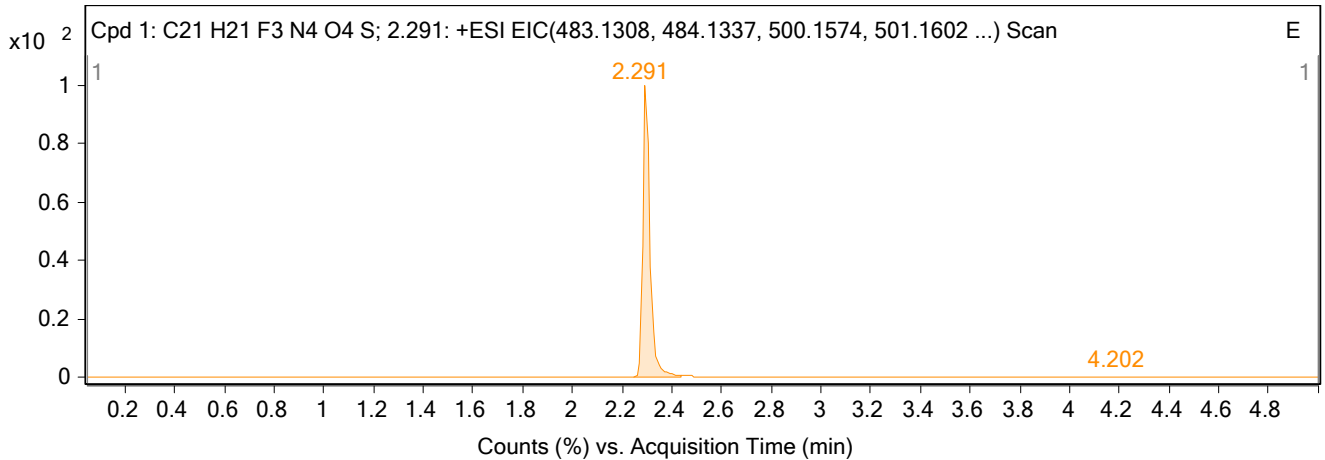

MS Zoomed Spectrum

# Target Compound Screening Report

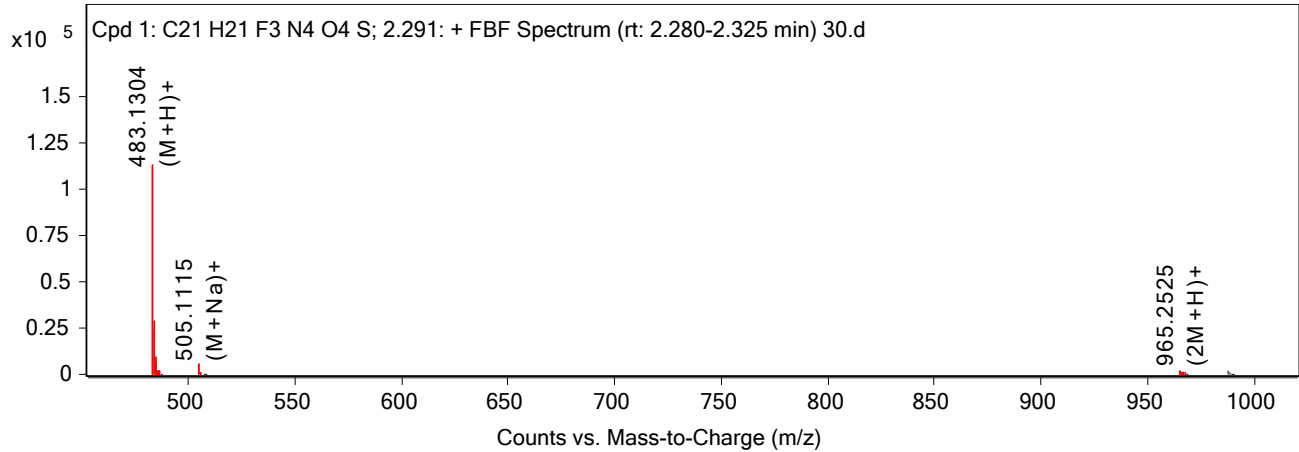

## MS Spectrum Peak List

| Obs. m/z | Charge | Abund     | Ion/Isotope |
|----------|--------|-----------|-------------|
| 483.1304 | 1      | 112535.14 | (M+H)+      |
| 484.1331 | 1      | 22723.8   | (M+H)+      |
| 485.1302 | 1      | 6765.78   | (M+H)+      |
| 486.1314 | 1      | 1226.17   | (M+H)+      |
| 505.1115 | 1      | 5266.39   | (M+Na)+     |
| 506.1152 | 1      | 1266.26   | (M+Na)+     |
| 965.2525 | 1      | 2162.13   | (2M+H)+     |
| 966.2584 | 1      | 973.14    | (2M+H)+     |
| 987.2346 | 1      | 1853.45   | (2M+Na)+    |
| 988.2376 | 1      | 959.07    | (2M+Na)+    |

## MS Zoomed Spectrum

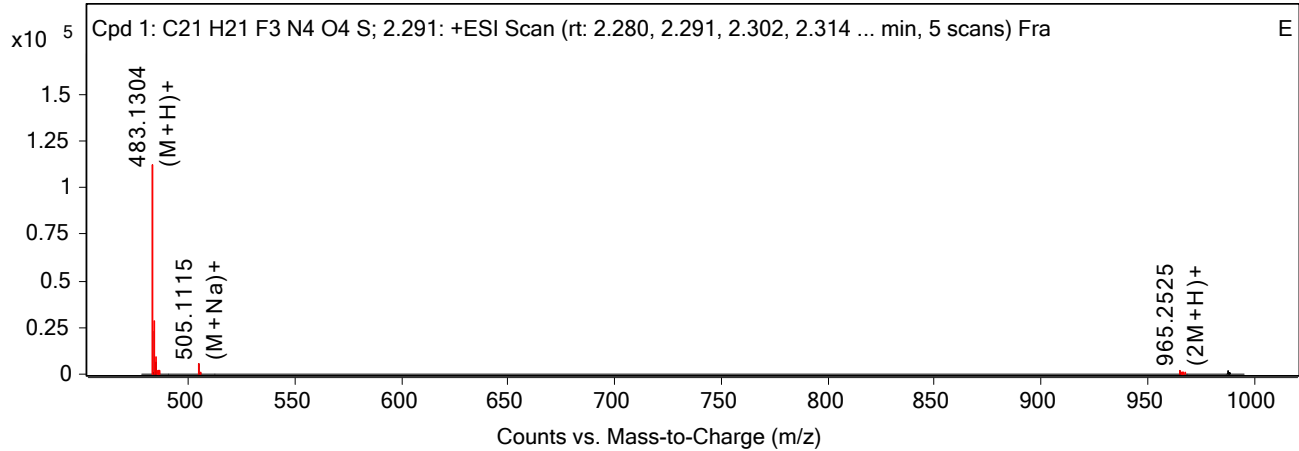

## MS Spectrum Peak List

| Obs. m/z | Charge | Abund     | Ion/Isotope | Tgt Mass Error (ppm) |
|----------|--------|-----------|-------------|----------------------|
| 483.1304 | 1      | 112535.14 | (M+H)+      | 0.88                 |
| 484.1331 | 1      | 22723.8   | (M+H)+      | 1.33                 |
| 485.1302 | 1      | 6765.78   | (M+H)+      | 1.96                 |
| 486.1314 | 1      | 1226.17   | (M+H)+      | 1.93                 |
| 505.1115 | 1      | 5266.39   | (M+Na)+     | 2.62                 |
| 506.1152 | 1      | 1266.26   | (M+Na)+     | 0.94                 |
| 965.2525 | 1      | 2162.13   | (2M+H)+     | 2.02                 |
| 966.2584 | 1      | 973.14    | (2M+H)+     | -1.14                |
| 987.2346 | 1      | 1853.45   | (2M+Na)+    | 1.74                 |
| 988.2376 | 1      | 959.07    | (2M+Na)+    | 1.65                 |

--- End Of Report ---

# Target Compound Screening Report

|                                 |                                        |                               |                                                     |
|---------------------------------|----------------------------------------|-------------------------------|-----------------------------------------------------|
| <b>Data File</b>                | 47.d                                   | <b>Sample Name</b>            | H1660622                                            |
| <b>Sample Type</b>              | Sample                                 | <b>Position</b>               | P1-F2                                               |
| <b>Instrument Name</b>          | Instrument 1                           | <b>User Name</b>              | Denis V.Bylina                                      |
| <b>Acq Method</b>               | Fast_Gradient_HRMS_pos_Lock_08272019.m | <b>Acquired Time</b>          | 9/23/2021 3:32:02 PM (UTC+03:00)                    |
| <b>IRM Calibration Status</b>   | Success                                | <b>DA Method</b>              | 1.m                                                 |
| <b>Comment</b>                  |                                        |                               |                                                     |
| <b>Sample Group</b>             |                                        | <b>Info.</b>                  | Agilent 6224 TOF LC/MS                              |
| <b>MFC</b>                      | C23H31N3O4S2                           | <b>Stream Name</b>            | LC 1                                                |
| <b>Acquisition Time (Local)</b> | 9/23/2021 3:32:02 PM (UTC+03:00)       | <b>Acquisition SW Version</b> | 6200 series TOF/6500 series Q-TOF B.08.00 (B8058.0) |
| <b>TOF Driver Version</b>       | 8.00.00                                | <b>TOF Firmware Version</b>   | 8.643                                               |
| <b>Tune Mass Range Max.</b>     | 1700                                   |                               |                                                     |

## Compound Table

| Label                          | Tgt Score | Mass Error (ppm) | Tgt Formula      | Obs. RT | Ref. Mass | Obs. Mass |
|--------------------------------|-----------|------------------|------------------|---------|-----------|-----------|
| Cpd 1: C23 H31 N3 O4 S2; 3.223 | 95.2      | -0.87            | C23 H31 N3 O4 S2 | 3.223   | 477.1756  | 477.1752  |

| Obs. m/z | Obs. RT | Obs. Mass | Tgt Formula      | Tgt Mass | Tgt Mass Error (ppm) | RT Diff.        | Find Cps Algorithm |
|----------|---------|-----------|------------------|----------|----------------------|-----------------|--------------------|
| 955.3579 | 3.223   | 477.1752  | C23 H31 N3 O4 S2 | 477.1756 | -0.87                | Find By Formula |                    |

## Compound Chromatograms

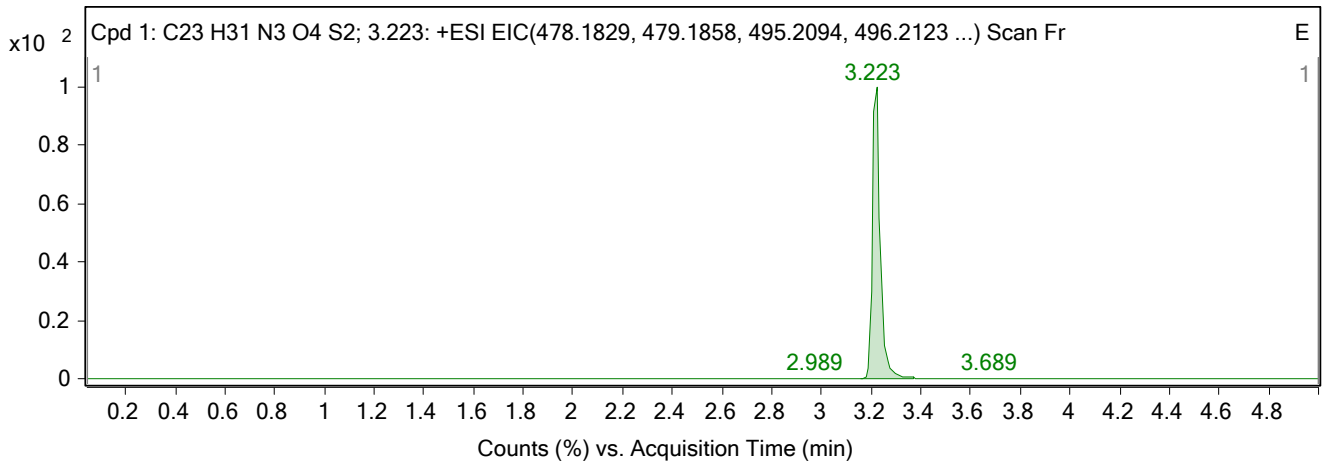

MS Zoomed Spectrum

# Target Compound Screening Report

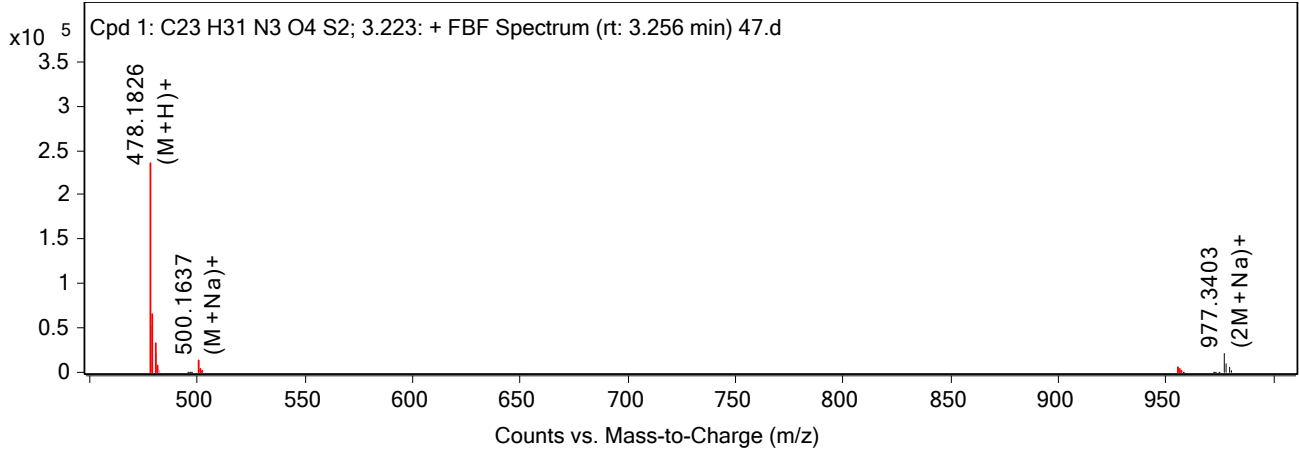

## MS Spectrum Peak List

| Obs. m/z | Charge | Abund     | Ion/Isotope |
|----------|--------|-----------|-------------|
| 478.1826 | 1      | 235155.36 | (M+H)+      |
| 479.1853 | 1      | 52884.65  | (M+H)+      |
| 480.1813 | 1      | 22050.39  | (M+H)+      |
| 481.1844 | 1      | 4296.08   | (M+H)+      |
| 500.1637 | 1      | 14220.31  | (M+Na)+     |
| 501.1666 | 1      | 3545.12   | (M+Na)+     |
| 955.3579 | 1      | 5968.19   | (2M+H)+     |
| 977.3403 | 1      | 21600.68  | (2M+Na)+    |
| 978.3414 | 1      | 10595.62  | (2M+Na)+    |
| 979.339  | 1      | 6303.5    | (2M+Na)+    |

## MS Zoomed Spectrum

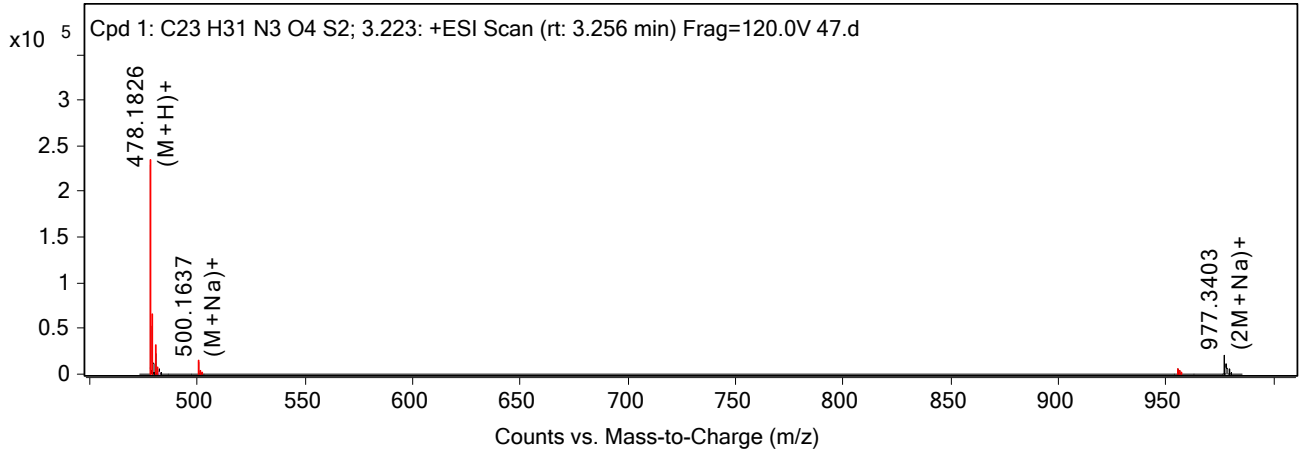

## MS Spectrum Peak List

| Obs. m/z | Charge | Abund     | Ion/Isotope | Tgt Mass Error (ppm) |
|----------|--------|-----------|-------------|----------------------|
| 478.1826 | 1      | 235155.36 | (M+H)+      | 0.48                 |
| 479.1853 | 1      | 52884.65  | (M+H)+      | 1.06                 |
| 480.1813 | 1      | 22050.39  | (M+H)+      | 1.49                 |
| 481.1844 | 1      | 4296.08   | (M+H)+      | -1.99                |
| 500.1637 | 1      | 14220.31  | (M+Na)+     | 2.18                 |
| 501.1666 | 1      | 3545.12   | (M+Na)+     | 2.33                 |
| 955.3579 | 1      | 5968.19   | (2M+H)+     | 0.6                  |
| 977.3403 | 1      | 21600.68  | (2M+Na)+    | 0.17                 |
| 978.3414 | 1      | 10595.62  | (2M+Na)+    | 1.99                 |
| 979.339  | 1      | 6303.5    | (2M+Na)+    | 2.04                 |

--- End Of Report ---



# Target Compound Screening Report

|                                 |                                        |                               |                                                     |
|---------------------------------|----------------------------------------|-------------------------------|-----------------------------------------------------|
| <b>Data File</b>                | 44.d                                   | <b>Sample Name</b>            | N953274\$2                                          |
| <b>Sample Type</b>              | Sample                                 | <b>Position</b>               | P1-E8                                               |
| <b>Instrument Name</b>          | Instrument 1                           | <b>User Name</b>              | Denis V.Bylina                                      |
| <b>Acq Method</b>               | Fast_Gradient_HRMS_pos_Lock_08272019.m | <b>Acquired Time</b>          | 9/23/2021 10:52:05 PM (UTC+03:00)                   |
| <b>IRM Calibration Status</b>   | Success                                | <b>DA Method</b>              | 1.m                                                 |
| <b>Comment</b>                  |                                        |                               |                                                     |
| <b>Sample Group</b>             |                                        | <b>Info.</b>                  | Agilent 6224 TOF LC/MS                              |
| <b>MFC</b>                      | C24H33N3O4S                            | <b>Stream Name</b>            | LC 1                                                |
| <b>Acquisition Time (Local)</b> | 9/23/2021 10:52:05 PM (UTC+03:00)      | <b>Acquisition SW Version</b> | 6200 series TOF/6500 series Q-TOF B.08.00 (B8058.0) |
| <b>TOF Driver Version</b>       | 8.00.00                                | <b>TOF Firmware Version</b>   | 8.643                                               |
| <b>Tune Mass Range Max.</b>     | 1700                                   |                               |                                                     |

## Compound Table

| Label                         | Tgt Score | Mass Error (ppm) | Tgt Formula     | Obs. RT | Ref. Mass | Obs. Mass |
|-------------------------------|-----------|------------------|-----------------|---------|-----------|-----------|
| Cpd 1: C24 H33 N3 O4 S; 2.897 | 97.85     | -2.62            | C24 H33 N3 O4 S | 2.897   | 459.2192  | 459.218   |

| Obs. m/z | Obs. RT | Obs. Mass | Tgt Formula     | Tgt Mass | Tgt Mass Error (ppm) | RT Diff.        | Find Cpds Algorithm |
|----------|---------|-----------|-----------------|----------|----------------------|-----------------|---------------------|
| 941.4254 | 2.897   | 459.218   | C24 H33 N3 O4 S | 459.2192 | -2.62                | Find By Formula |                     |

## Compound Chromatograms

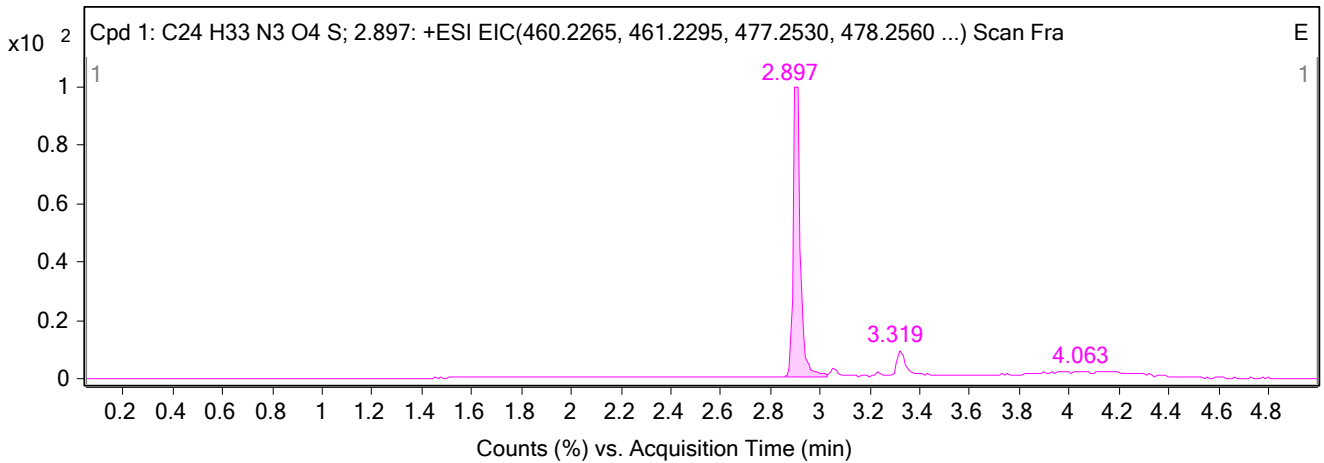

MS Zoomed Spectrum

# Target Compound Screening Report

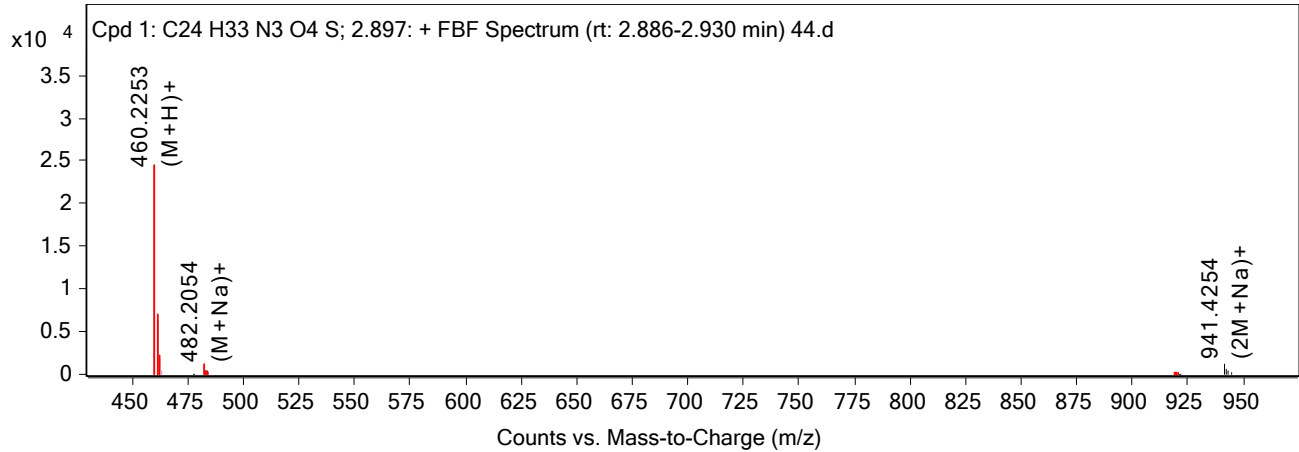

## MS Spectrum Peak List

| Obs. m/z | Charge | Abund    | Ion/Isotope |
|----------|--------|----------|-------------|
| 460.2253 | 1      | 24467.78 | (M+H)+      |
| 461.2286 | 1      | 6231.39  | (M+H)+      |
| 462.2262 | 1      | 1853.54  | (M+H)+      |
| 482.2054 | 1      | 953.12   | (M+Na)+     |
| 483.2103 | 1      | 332.37   | (M+Na)+     |
| 484.2093 | 1      | 360.64   | (M+Na)+     |
| 919.4441 | 1      | 213.1    | (2M+H)+     |
| 941.4254 | 1      | 1232.33  | (2M+Na)+    |
| 942.4287 | 1      | 683.17   | (2M+Na)+    |
| 943.4281 | 1      | 322.18   | (2M+Na)+    |

## MS Zoomed Spectrum

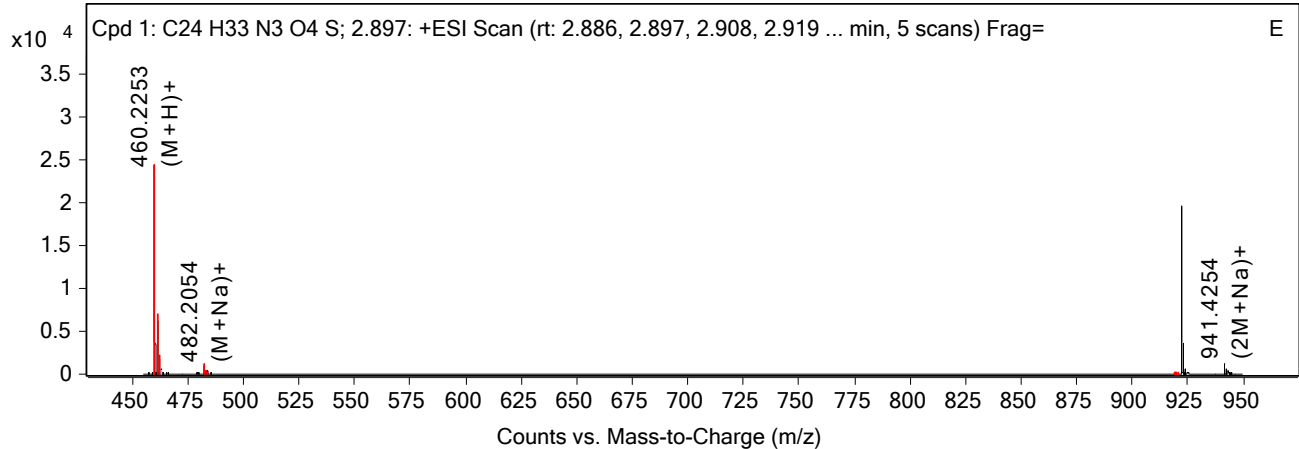

## MS Spectrum Peak List

| Obs. m/z | Charge | Abund    | Ion/Isotope | Tgt Mass Error (ppm) |
|----------|--------|----------|-------------|----------------------|
| 460.2253 | 1      | 24467.78 | (M+H)+      | 2.46                 |
| 461.2286 | 1      | 6231.39  | (M+H)+      | 1.98                 |
| 462.2262 | 1      | 1853.54  | (M+H)+      | 2.56                 |
| 482.2054 | 1      | 953.12   | (M+Na)+     | 6.12                 |
| 483.2103 | 1      | 332.37   | (M+Na)+     | 2.31                 |
| 484.2093 | 1      | 360.64   | (M+Na)+     | -0.05                |
| 919.4441 | 1      | 213.1    | (2M+H)+     | 1.65                 |
| 941.4254 | 1      | 1232.33  | (2M+Na)+    | 2.31                 |
| 942.4287 | 1      | 683.17   | (2M+Na)+    | 2.09                 |
| 943.4281 | 1      | 322.18   | (2M+Na)+    | 2.05                 |

--- End Of Report ---

# Target Compound Screening Report

|                                 |                                        |                               |                                                     |
|---------------------------------|----------------------------------------|-------------------------------|-----------------------------------------------------|
| <b>Data File</b>                | 37.d                                   | <b>Sample Name</b>            | H1660662                                            |
| <b>Sample Type</b>              | Sample                                 | <b>Position</b>               | P1-E1                                               |
| <b>Instrument Name</b>          | Instrument 1                           | <b>User Name</b>              | Denis V.Bylina                                      |
| <b>Acq Method</b>               | Fast_Gradient_HRMS_pos_Lock_08272019.m | <b>Acquired Time</b>          | 9/23/2021 2:36:35 PM (UTC+03:00)                    |
| <b>IRM Calibration Status</b>   | Success                                | <b>DA Method</b>              | 1.m                                                 |
| <b>Comment</b>                  |                                        |                               |                                                     |
| <b>Sample Group</b>             |                                        | <b>Info.</b>                  | Agilent 6224 TOF LC/MS                              |
| <b>MFC</b>                      | C23H28N4O3S                            | <b>Stream Name</b>            | LC 1                                                |
| <b>Acquisition Time (Local)</b> | 9/23/2021 2:36:35 PM (UTC+03:00)       | <b>Acquisition SW Version</b> | 6200 series TOF/6500 series Q-TOF B.08.00 (B8058.0) |
| <b>TOF Driver Version</b>       | 8.00.00                                | <b>TOF Firmware Version</b>   | 8.643                                               |
| <b>Tune Mass Range Max.</b>     | 1700                                   |                               |                                                     |

### Compound Table

| Label                         | Tgt Score | Mass Error (ppm) | Tgt Formula     | Obs. RT | Ref. Mass | Obs. Mass |
|-------------------------------|-----------|------------------|-----------------|---------|-----------|-----------|
| Cpd 1: C23 H28 N4 O3 S; 2.977 | 97.98     | -0.89            | C23 H28 N4 O3 S | 2.977   | 440.1882  | 440.1878  |

| Obs. m/z | Obs. RT | Obs. Mass | Tgt Formula     | Tgt Mass | Tgt Mass Error (ppm) | RT Diff.        | Find Cpds Algorithm |
|----------|---------|-----------|-----------------|----------|----------------------|-----------------|---------------------|
| 881.3822 | 2.977   | 440.1878  | C23 H28 N4 O3 S | 440.1882 | -0.89                | Find By Formula |                     |

### Compound Chromatograms

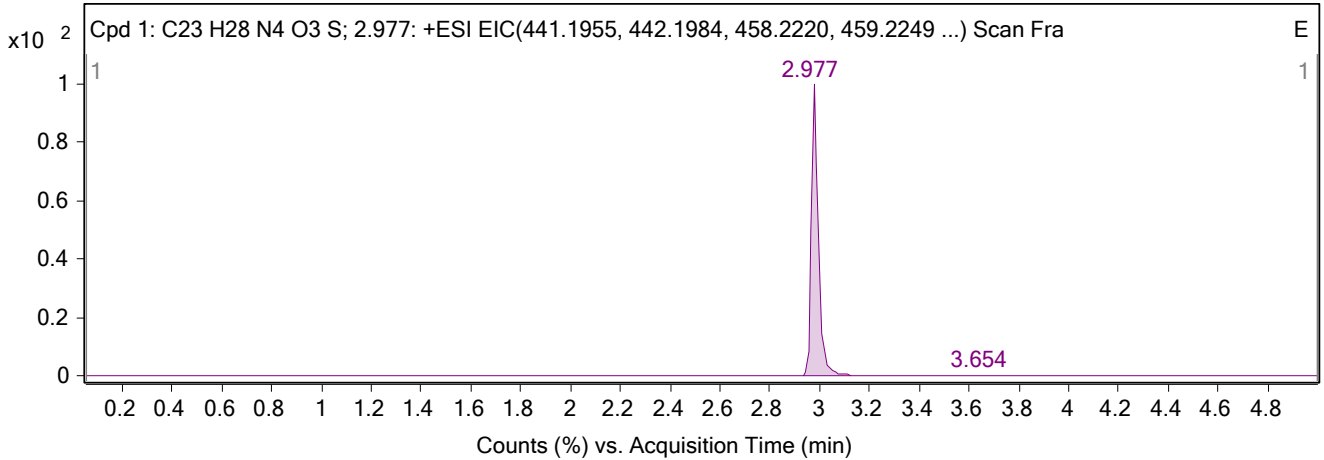

MS Zoomed Spectrum

# Target Compound Screening Report

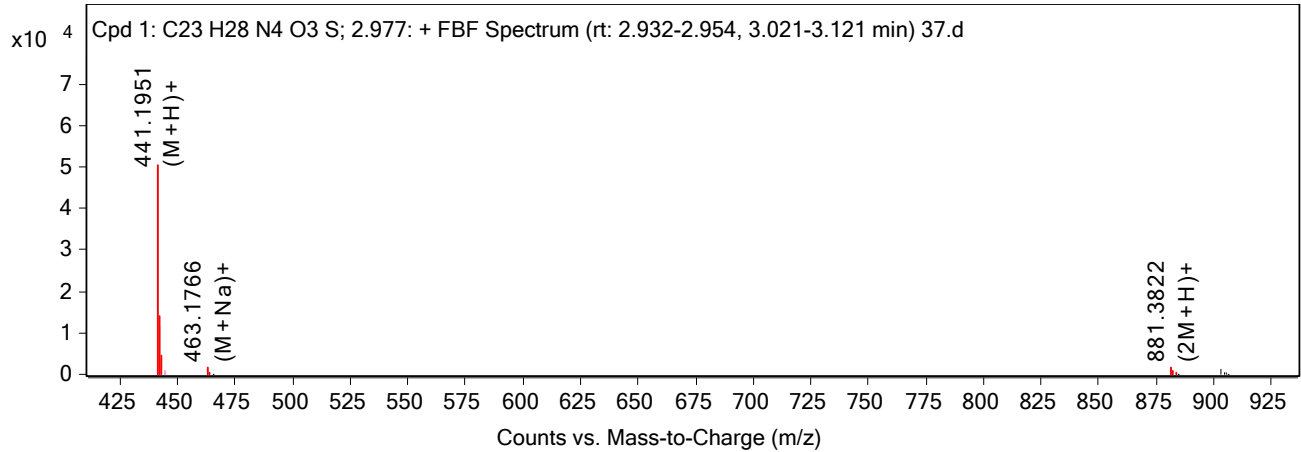

## MS Spectrum Peak List

| Obs. m/z | Charge | Abund    | Ion/Isotope |
|----------|--------|----------|-------------|
| 441.1951 | 1      | 50384.77 | (M+H)+      |
| 442.1982 | 1      | 11759    | (M+H)+      |
| 443.1962 | 1      | 3186.91  | (M+H)+      |
| 463.1766 | 1      | 1729.45  | (M+Na)+     |
| 464.1804 | 1      | 514.03   | (M+Na)+     |
| 881.3822 | 1      | 1739.52  | (2M+H)+     |
| 882.3858 | 1      | 992.88   | (2M+H)+     |
| 883.3847 | 1      | 431.51   | (2M+H)+     |
| 903.364  | 1      | 1085.37  | (2M+Na)+    |
| 904.367  | 1      | 589.18   | (2M+Na)+    |

## MS Zoomed Spectrum

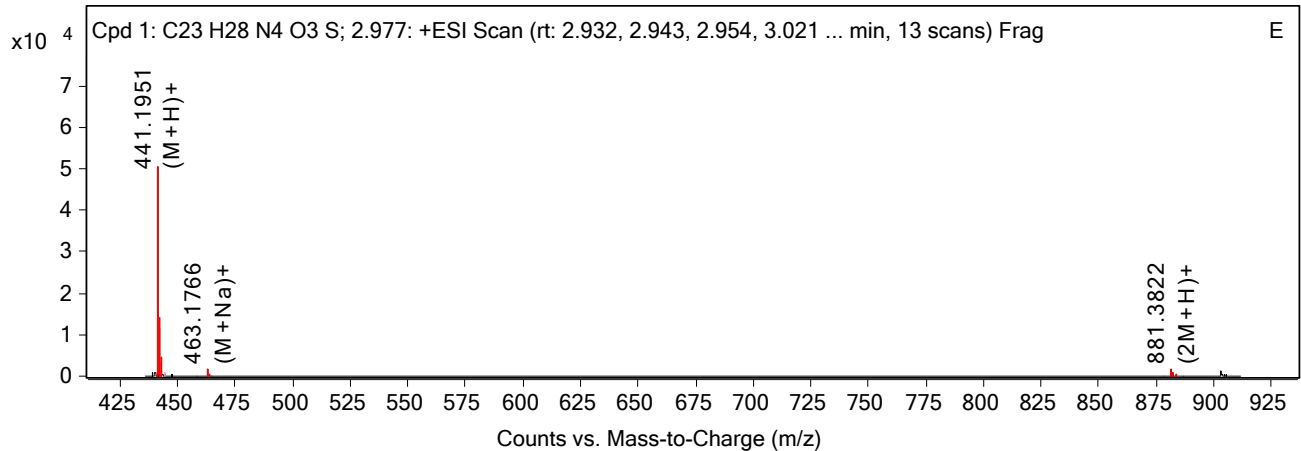

## MS Spectrum Peak List

| Obs. m/z | Charge | Abund    | Ion/Isotope | Tgt Mass Error (ppm) |
|----------|--------|----------|-------------|----------------------|
| 441.1951 | 1      | 50384.77 | (M+H)+      | 0.77                 |
| 442.1982 | 1      | 11759    | (M+H)+      | 0.45                 |
| 443.1962 | 1      | 3186.91  | (M+H)+      | -0.27                |
| 463.1766 | 1      | 1729.45  | (M+Na)+     | 1.83                 |
| 464.1804 | 1      | 514.03   | (M+Na)+     | 0.05                 |
| 881.3822 | 1      | 1739.52  | (2M+H)+     | 1.7                  |
| 882.3858 | 1      | 992.88   | (2M+H)+     | 1.01                 |
| 883.3847 | 1      | 431.51   | (2M+H)+     | 1.39                 |
| 903.364  | 1      | 1085.37  | (2M+Na)+    | 1.87                 |
| 904.367  | 1      | 589.18   | (2M+Na)+    | 1.71                 |

--- End Of Report ---

# Target Compound Screening Report

|                                 |                                        |                               |                                                     |
|---------------------------------|----------------------------------------|-------------------------------|-----------------------------------------------------|
| <b>Data File</b>                | 44.d                                   | <b>Sample Name</b>            | H1657338                                            |
| <b>Sample Type</b>              | Sample                                 | <b>Position</b>               | P1-E8                                               |
| <b>Instrument Name</b>          | Instrument 1                           | <b>User Name</b>              | Denis V.Bylina                                      |
| <b>Acq Method</b>               | Fast_Gradient_HRMS_pos_Lock_08272019.m | <b>Acquired Time</b>          | 9/23/2021 3:15:28 PM (UTC+03:00)                    |
| <b>IRM Calibration Status</b>   | Success                                | <b>DA Method</b>              | 1.m                                                 |
| <b>Comment</b>                  |                                        |                               |                                                     |
| <b>Sample Group</b>             |                                        | <b>Info.</b>                  | Agilent 6224 TOF LC/MS                              |
| <b>MFC</b>                      | C24H29N3O2                             | <b>Stream Name</b>            | LC 1                                                |
| <b>Acquisition Time (Local)</b> | 9/23/2021 3:15:28 PM (UTC+03:00)       | <b>Acquisition SW Version</b> | 6200 series TOF/6500 series Q-TOF B.08.00 (B8058.0) |
| <b>TOF Driver Version</b>       | 8.00.00                                | <b>TOF Firmware Version</b>   | 8.643                                               |
| <b>Tune Mass Range Max.</b>     | 1700                                   |                               |                                                     |

### Compound Table

| Label                       | Tgt Score | Mass Error (ppm) | Tgt Formula   | Obs. RT | Ref. Mass | Obs. Mass |
|-----------------------------|-----------|------------------|---------------|---------|-----------|-----------|
| Cpd 1: C24 H29 N3 O2; 2.588 | 97.89     | -0.19            | C24 H29 N3 O2 | 2.588   | 391.226   | 391.2259  |

| Obs. m/z | Obs. RT | Obs. Mass | Tgt Formula   | Tgt Mass | Tgt Mass Error (ppm) | RT Diff.        | Find Cpds Algorithm |
|----------|---------|-----------|---------------|----------|----------------------|-----------------|---------------------|
| 392.2332 | 2.588   | 391.2259  | C24 H29 N3 O2 | 391.226  | -0.19                | Find By Formula |                     |

### Compound Chromatograms

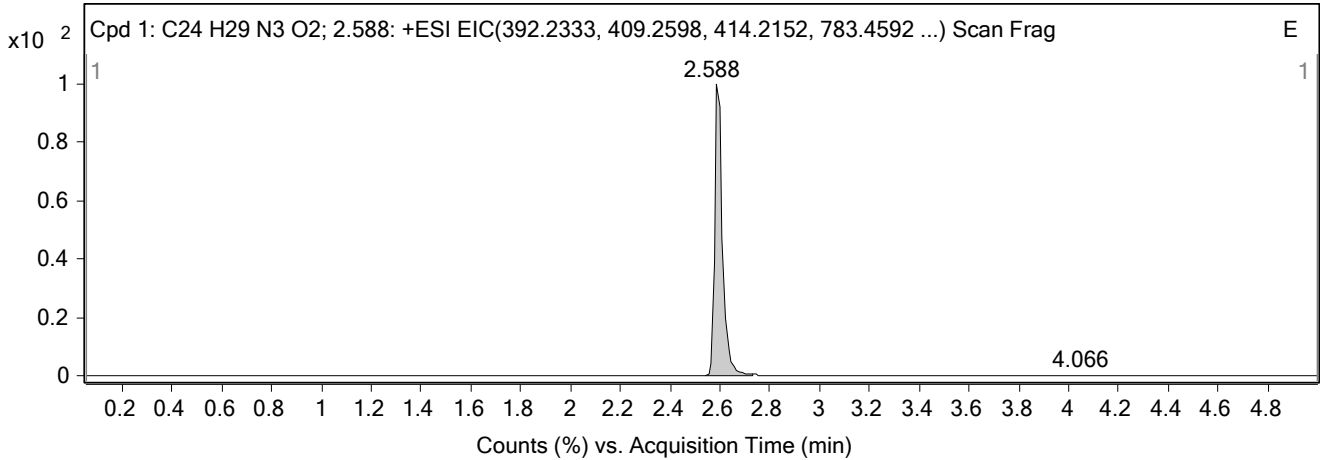

MS Zoomed Spectrum

# Target Compound Screening Report

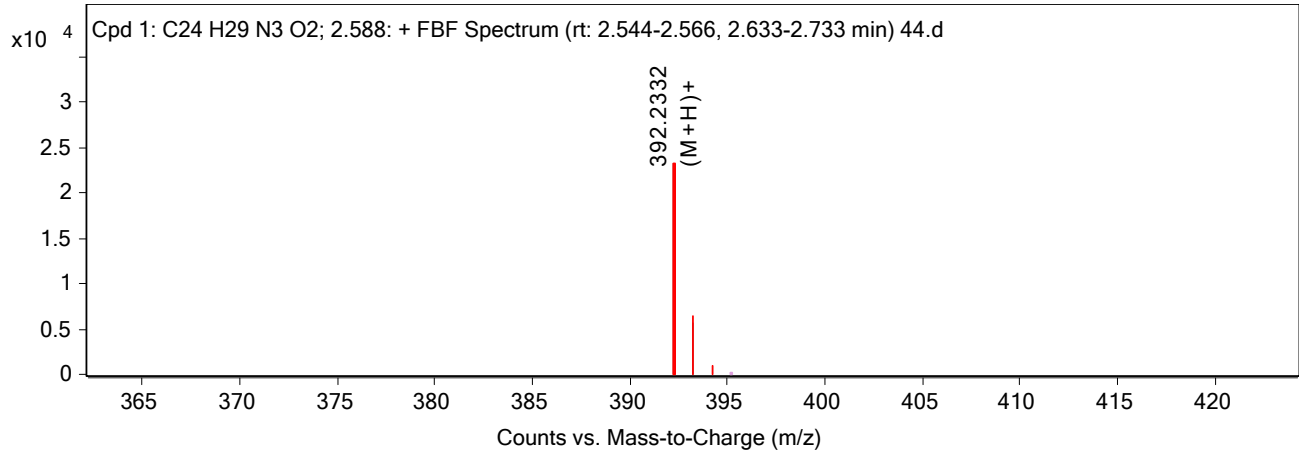

## MS Spectrum Peak List

| Obs. m/z | Charge | Abund    | Ion/Isotope |
|----------|--------|----------|-------------|
| 392.2332 | 1      | 23266.55 | (M+H)+      |
| 393.2364 | 1      | 5583.1   | (M+H)+      |
| 394.2386 | 1      | 866.02   | (M+H)+      |

## MS Zoomed Spectrum

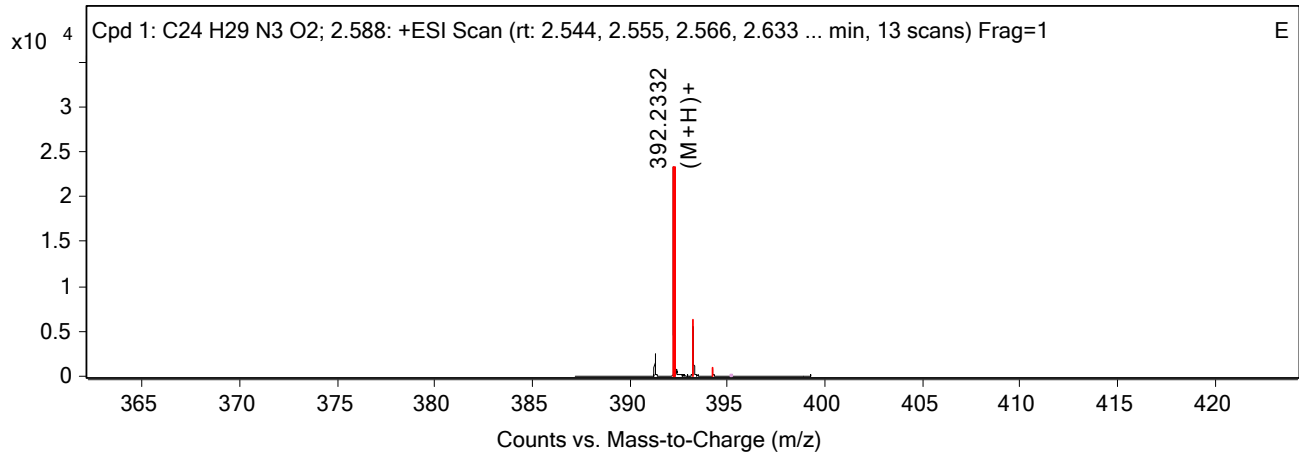

## MS Spectrum Peak List

| Obs. m/z | Charge | Abund    | Ion/Isotope | Tgt Mass Error (ppm) |
|----------|--------|----------|-------------|----------------------|
| 392.2332 | 1      | 23266.55 | (M+H)+      | 0.14                 |
| 392.2332 | 1      | 23266.55 | (M+H)+      |                      |
| 393.2364 | 1      | 5583.1   | (M+H)+      | 0.09                 |
| 394.2386 | 1      | 866.02   | (M+H)+      | 1.94                 |

--- End Of Report ---

# Target Compound Screening Report

|                                 |                                        |                               |                                                     |
|---------------------------------|----------------------------------------|-------------------------------|-----------------------------------------------------|
| <b>Data File</b>                | 34.d                                   | <b>Sample Name</b>            | H2974295                                            |
| <b>Sample Type</b>              | Sample                                 | <b>Position</b>               | P1-D7                                               |
| <b>Instrument Name</b>          | Instrument 1                           | <b>User Name</b>              | Denis V.Bylina                                      |
| <b>Acq Method</b>               | Fast_Gradient_HRMS_pos_Lock_08272019.m | <b>Acquired Time</b>          | 9/24/2021 1:23:38 PM (UTC+03:00)                    |
| <b>IRM Calibration Status</b>   | Success                                | <b>DA Method</b>              | 1.m                                                 |
| <b>Comment</b>                  |                                        |                               |                                                     |
| <b>Sample Group</b>             |                                        | <b>Info.</b>                  | Agilent 6224 TOF LC/MS                              |
| <b>MFC</b>                      | C22H33N3O5S2                           | <b>Stream Name</b>            | LC 1                                                |
| <b>Acquisition Time (Local)</b> | 9/24/2021 1:23:38 PM (UTC+03:00)       | <b>Acquisition SW Version</b> | 6200 series TOF/6500 series Q-TOF B.08.00 (B8058.0) |
| <b>TOF Driver Version</b>       | 8.00.00                                | <b>TOF Firmware Version</b>   | 8.643                                               |
| <b>Tune Mass Range Max.</b>     | 1700                                   |                               |                                                     |

## Compound Table

| Label                          | Tgt Score | Mass Error (ppm) | Tgt Formula      | Obs. RT | Ref. Mass | Obs. Mass |
|--------------------------------|-----------|------------------|------------------|---------|-----------|-----------|
| Cpd 1: C22 H33 N3 O5 S2; 2.917 | 94.1      | -1.22            | C22 H33 N3 O5 S2 | 2.917   | 483.1862  | 483.1856  |

| Obs. m/z | Obs. RT | Obs. Mass | Tgt Formula      | Tgt Mass | Tgt Mass Error (ppm) | RT Diff.        | Find Cpds Algorithm |
|----------|---------|-----------|------------------|----------|----------------------|-----------------|---------------------|
| 484.193  | 2.917   | 483.1856  | C22 H33 N3 O5 S2 | 483.1862 | -1.22                | Find By Formula |                     |

## Compound Chromatograms

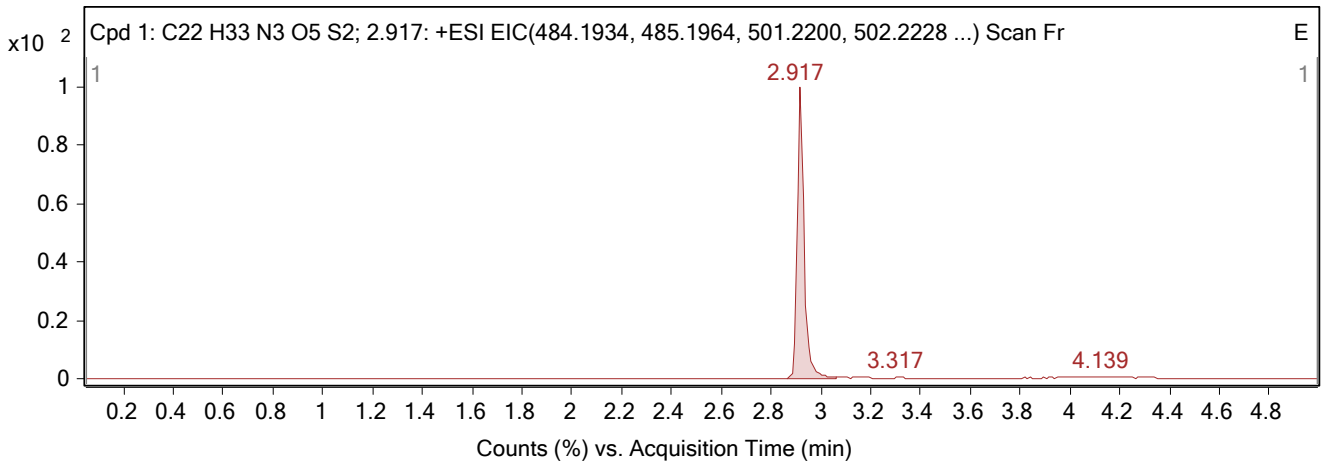

MS Zoomed Spectrum

# Target Compound Screening Report

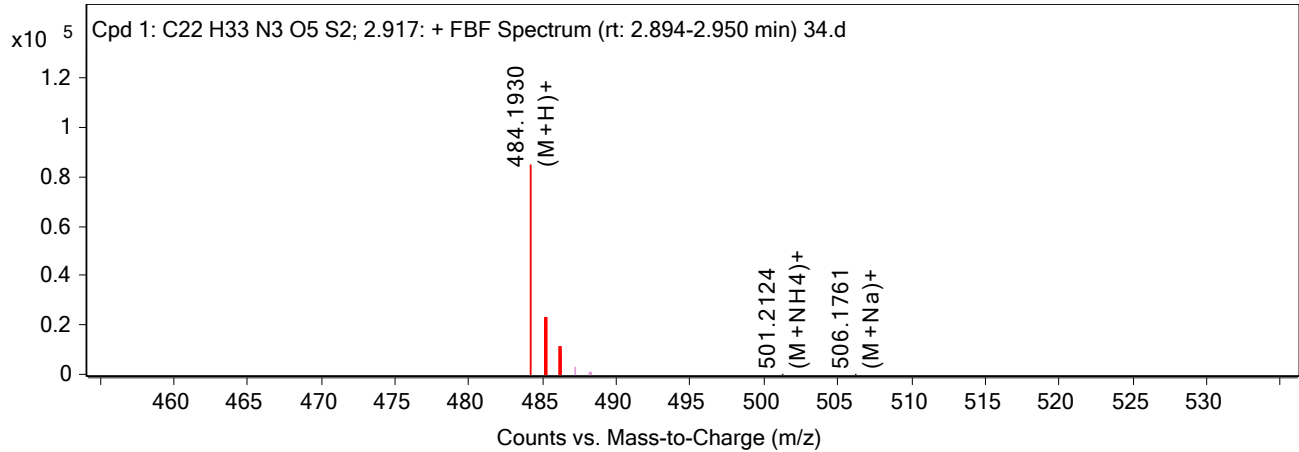

## MS Spectrum Peak List

| Obs. m/z | Charge | Abund    | Ion/Isotope |
|----------|--------|----------|-------------|
| 484.193  | 1      | 84677.05 | (M+H)+      |
| 485.1952 | 1      | 18926.76 | (M+H)+      |
| 486.1919 | 1      | 8357.12  | (M+H)+      |
| 501.2124 | 1      | 51.01    | (M+NH4)+    |
| 506.1761 | 1      | 114.2    | (M+Na)+     |

## MS Zoomed Spectrum

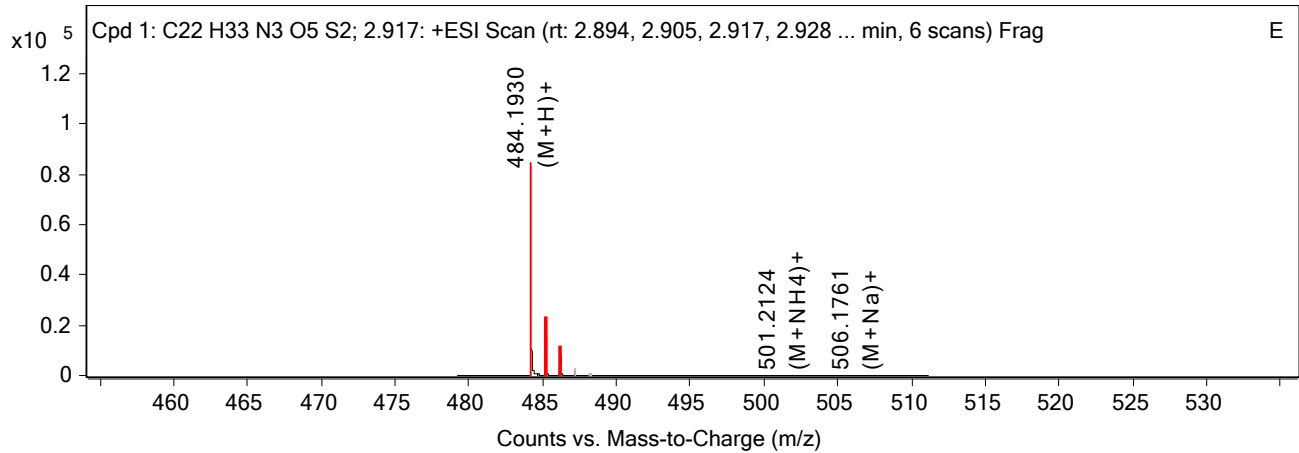

## MS Spectrum Peak List

| Obs. m/z | Charge | Abund    | Ion/Isotope | Tgt Mass Error (ppm) |
|----------|--------|----------|-------------|----------------------|
| 484.193  | 1      | 84677.04 | (M+H)+      | 0.97                 |
| 484.193  |        | 84677.04 |             |                      |
| 485.1952 | 1      | 18926.76 | (M+H)+      | 2.31                 |
| 486.1919 | 1      | 8357.12  | (M+H)+      | 1.21                 |
| 501.2124 | 1      | 51.01    | (M+NH4)+    | 15.16                |
| 506.1761 | 1      | 114.2    | (M+Na)+     | -1.44                |

--- End Of Report ---



# Target Compound Screening Report

|                                 |                                        |                               |                                                     |
|---------------------------------|----------------------------------------|-------------------------------|-----------------------------------------------------|
| <b>Data File</b>                | 21.d                                   | <b>Sample Name</b>            | H2045012                                            |
| <b>Sample Type</b>              | Sample                                 | <b>Position</b>               | P1-C3                                               |
| <b>Instrument Name</b>          | Instrument 1                           | <b>User Name</b>              | Denis V.Bylina                                      |
| <b>Acq Method</b>               | Fast_Gradient_HRMS_pos_Lock_08272019.m | <b>Acquired Time</b>          | 9/23/2021 1:07:42 PM (UTC+03:00)                    |
| <b>IRM Calibration Status</b>   | Success                                | <b>DA Method</b>              | 1.m                                                 |
| <b>Comment</b>                  |                                        |                               |                                                     |
| <b>Sample Group</b>             |                                        | <b>Info.</b>                  | Agilent 6224 TOF LC/MS                              |
| <b>MFC</b>                      | C20H18FN3O3S2                          | <b>Stream Name</b>            | LC 1                                                |
| <b>Acquisition Time (Local)</b> | 9/23/2021 1:07:42 PM (UTC+03:00)       | <b>Acquisition SW Version</b> | 6200 series TOF/6500 series Q-TOF B.08.00 (B8058.0) |
| <b>TOF Driver Version</b>       | 8.00.00                                | <b>TOF Firmware Version</b>   | 8.643                                               |
| <b>Tune Mass Range Max.</b>     | 1700                                   |                               |                                                     |

### Compound Table

| Label                            | Tgt Score | Mass Error (ppm) | Tgt Formula        | Obs. RT | Ref. Mass | Obs. Mass |
|----------------------------------|-----------|------------------|--------------------|---------|-----------|-----------|
| Cpd 1: C20 H18 F N3 O3 S2; 3.309 | 97.57     | -1.11            | C20 H18 F N3 O3 S2 | 3.309   | 431.0774  | 431.0769  |

| Obs. m/z | Obs. RT | Obs. Mass | Tgt Formula        | Tgt Mass | Tgt Mass Error (ppm) | RT Diff.        | Find Cpds Algorithm |
|----------|---------|-----------|--------------------|----------|----------------------|-----------------|---------------------|
| 454.0658 | 3.309   | 431.0769  | C20 H18 F N3 O3 S2 | 431.0774 | -1.11                | Find By Formula |                     |

### Compound Chromatograms

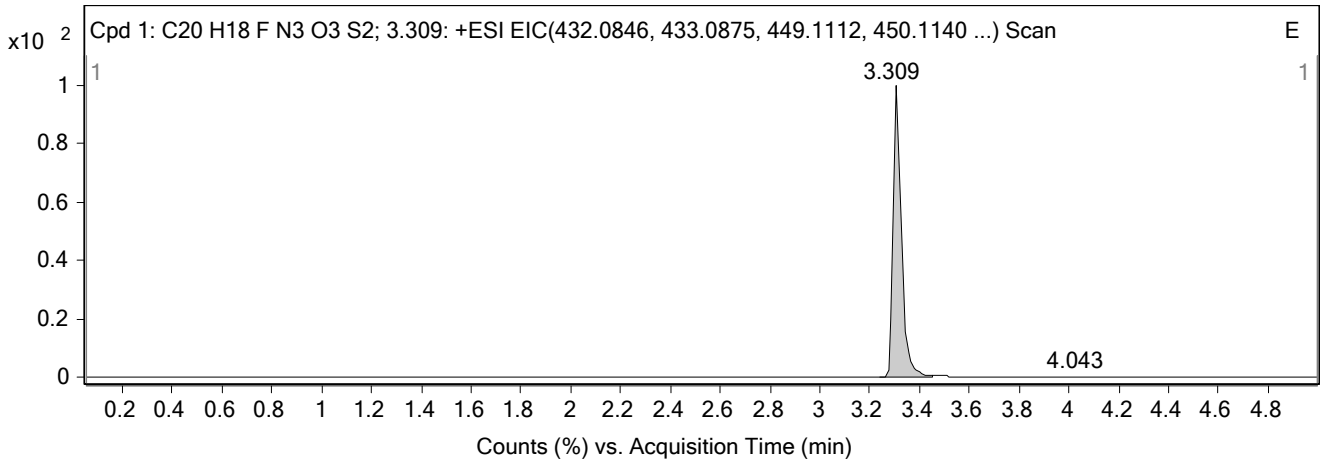

MS Zoomed Spectrum

# Target Compound Screening Report

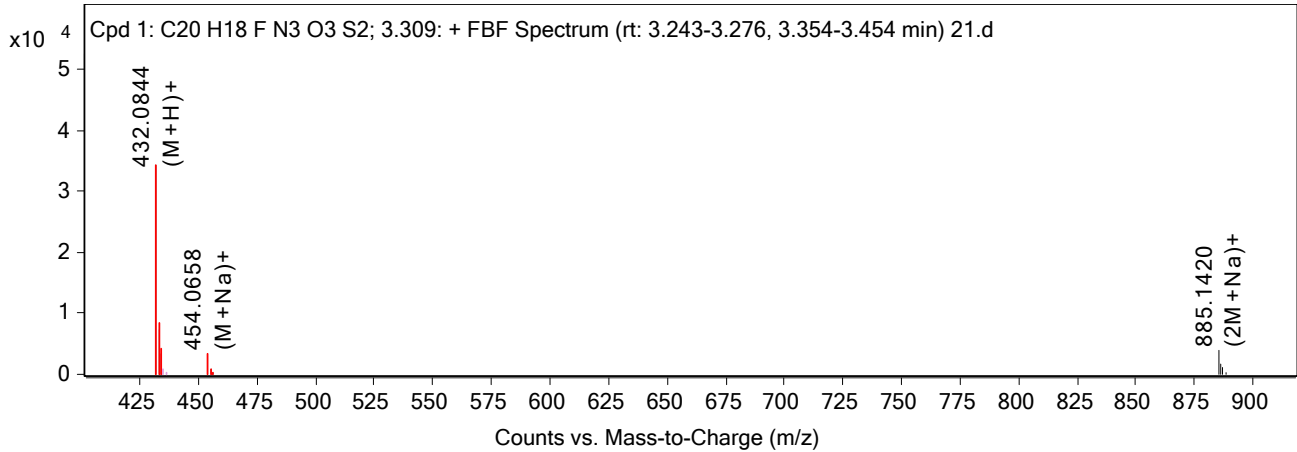

## MS Spectrum Peak List

| Obs. m/z | Charge | Abund    | Ion/Isotope |
|----------|--------|----------|-------------|
| 432.0844 | 1      | 34400.64 | (M+H)+      |
| 433.0873 | 1      | 7304.68  | (M+H)+      |
| 434.0827 | 1      | 3295.85  | (M+H)+      |
| 454.0658 | 1      | 3357.05  | (M+Na)+     |
| 455.0689 | 1      | 790.06   | (M+Na)+     |
| 456.064  | 1      | 380.87   | (M+Na)+     |
| 885.142  | 1      | 3822.59  | (2M+Na)+    |
| 886.1445 | 1      | 1829.54  | (2M+Na)+    |
| 887.1423 | 1      | 1081.26  | (2M+Na)+    |
| 888.1441 | 1      | 387.19   | (2M+Na)+    |

## MS Zoomed Spectrum

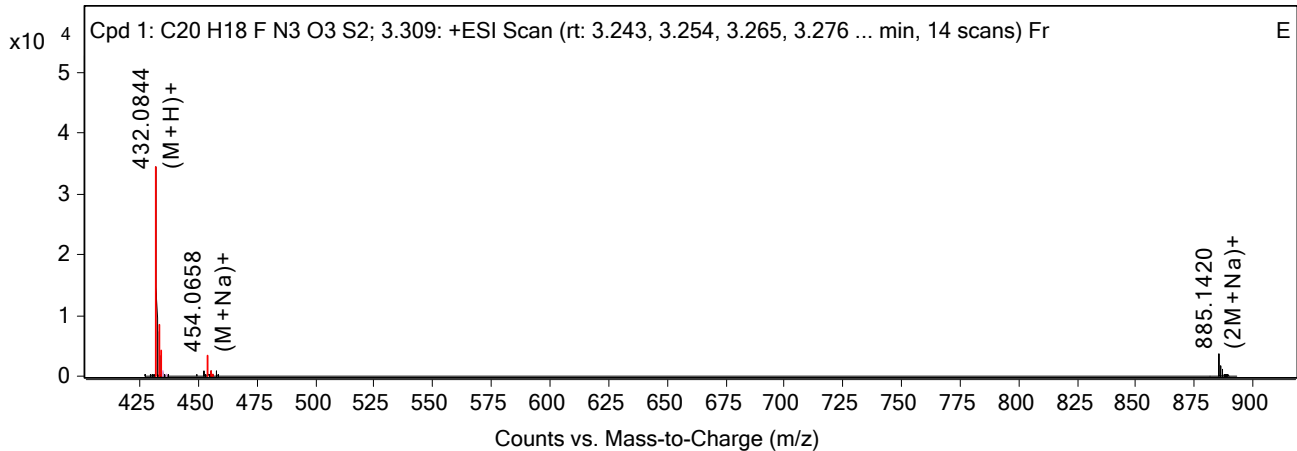

## MS Spectrum Peak List

| Obs. m/z | Charge | Abund    | Ion/Isotope | Tgt Mass Error (ppm) |
|----------|--------|----------|-------------|----------------------|
| 432.0844 | 1      | 34400.64 | (M+H)+      | 0.51                 |
| 433.0873 | 1      | 7304.68  | (M+H)+      | 0.41                 |
| 434.0827 | 1      | 3295.85  | (M+H)+      | 0.97                 |
| 454.0658 | 1      | 3357.05  | (M+Na)+     | 1.74                 |
| 455.0689 | 1      | 790.06   | (M+Na)+     | 1.19                 |
| 456.064  | 1      | 380.87   | (M+Na)+     | 2.33                 |
| 885.142  | 1      | 3822.59  | (2M+Na)+    | 2.15                 |
| 886.1445 | 1      | 1829.54  | (2M+Na)+    | 2.58                 |
| 887.1423 | 1      | 1081.26  | (2M+Na)+    | 1.74                 |
| 888.1441 | 1      | 387.19   | (2M+Na)+    | 0.77                 |

--- End Of Report ---

# Target Compound Screening Report

|                                 |                                        |                               |                                                     |
|---------------------------------|----------------------------------------|-------------------------------|-----------------------------------------------------|
| <b>Data File</b>                | 19.d                                   | <b>Sample Name</b>            | H2982866                                            |
| <b>Sample Type</b>              | Sample                                 | <b>Position</b>               | P1-C1                                               |
| <b>Instrument Name</b>          | Instrument 1                           | <b>User Name</b>              | Denis V.Bylina                                      |
| <b>Acq Method</b>               | Fast_Gradient_HRMS_pos_Lock_08272019.m | <b>Acquired Time</b>          | 9/24/2021 11:58:47 AM (UTC+03:00)                   |
| <b>IRM Calibration Status</b>   | Success                                | <b>DA Method</b>              | 1.m                                                 |
| <b>Comment</b>                  |                                        |                               |                                                     |
| <b>Sample Group</b>             |                                        | <b>Info.</b>                  | Agilent 6224 TOF LC/MS                              |
| <b>MFC</b>                      | C25H28N4O2                             | <b>Stream Name</b>            | LC 1                                                |
| <b>Acquisition Time (Local)</b> | 9/24/2021 11:58:47 AM (UTC+03:00)      | <b>Acquisition SW Version</b> | 6200 series TOF/6500 series Q-TOF B.08.00 (B8058.0) |
| <b>TOF Driver Version</b>       | 8.00.00                                | <b>TOF Firmware Version</b>   | 8.643                                               |
| <b>Tune Mass Range Max.</b>     | 1700                                   |                               |                                                     |

## Compound Table

| Label                       | Tgt Score | Mass Error (ppm) | Tgt Formula   | Obs. RT | Ref. Mass | Obs. Mass |
|-----------------------------|-----------|------------------|---------------|---------|-----------|-----------|
| Cpd 1: C25 H28 N4 O2; 3.335 | 95.49     | -1.47            | C25 H28 N4 O2 | 3.335   | 416.2212  | 416.2206  |

| Obs. m/z | Obs. RT | Obs. Mass | Tgt Formula   | Tgt Mass | Tgt Mass Error (ppm) | RT Diff.        | Find Cpds Algorithm |
|----------|---------|-----------|---------------|----------|----------------------|-----------------|---------------------|
| 417.2279 | 3.335   | 416.2206  | C25 H28 N4 O2 | 416.2212 | -1.47                | Find By Formula |                     |

## Compound Chromatograms

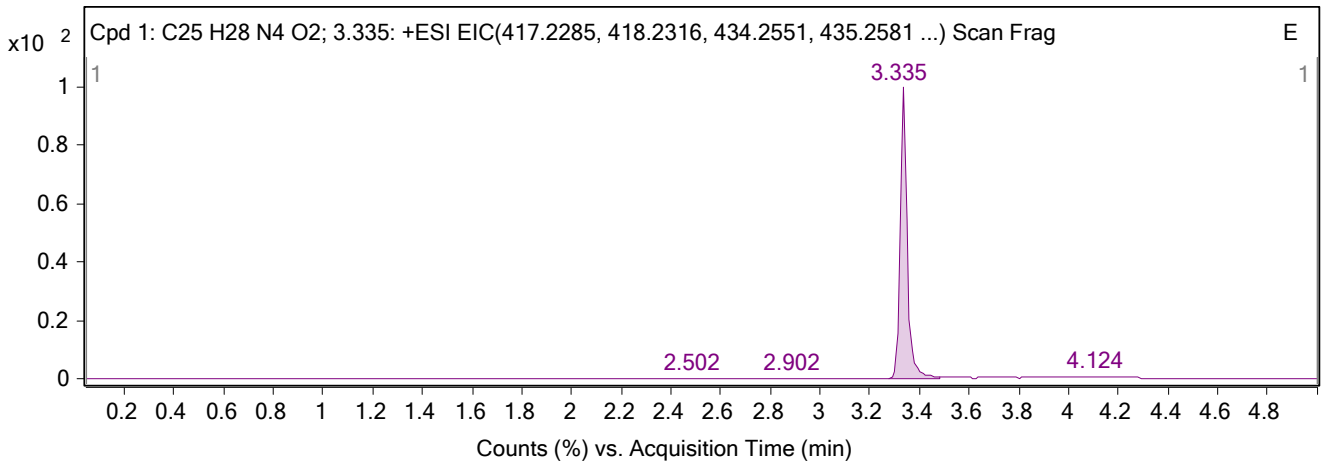

MS Zoomed Spectrum

# Target Compound Screening Report

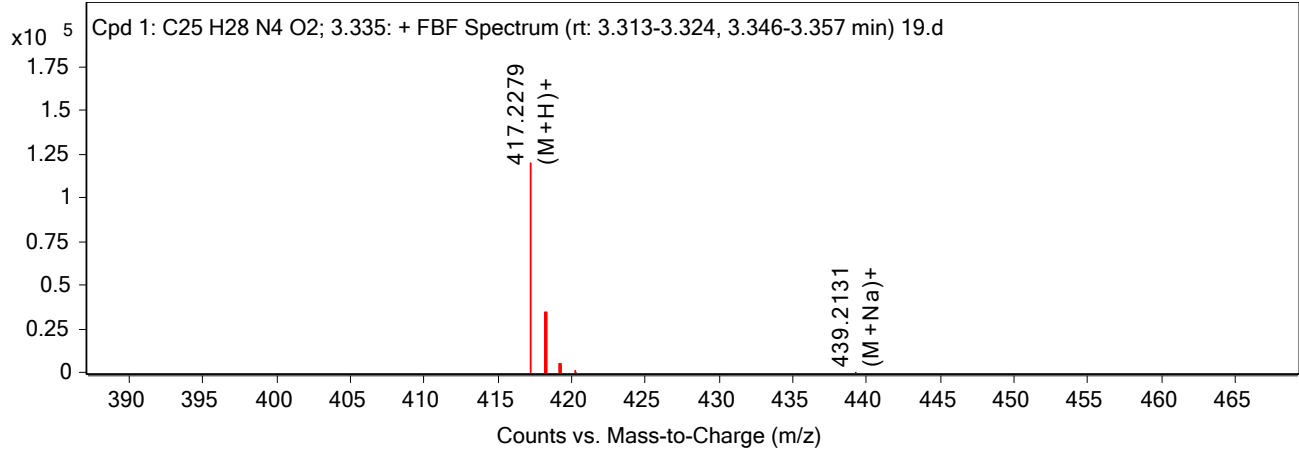

## MS Spectrum Peak List

| Obs. m/z | Charge | Abund     | Ion/Isotope |
|----------|--------|-----------|-------------|
| 417.2279 | 1      | 119662.51 | (M+H)+      |
| 418.2308 | 1      | 28702.96  | (M+H)+      |
| 419.2344 | 1      | 3767.42   | (M+H)+      |
| 420.2377 | 1      | 500.54    | (M+H)+      |
| 439.2131 | 1      | 388.25    | (M+Na)+     |

## MS Zoomed Spectrum

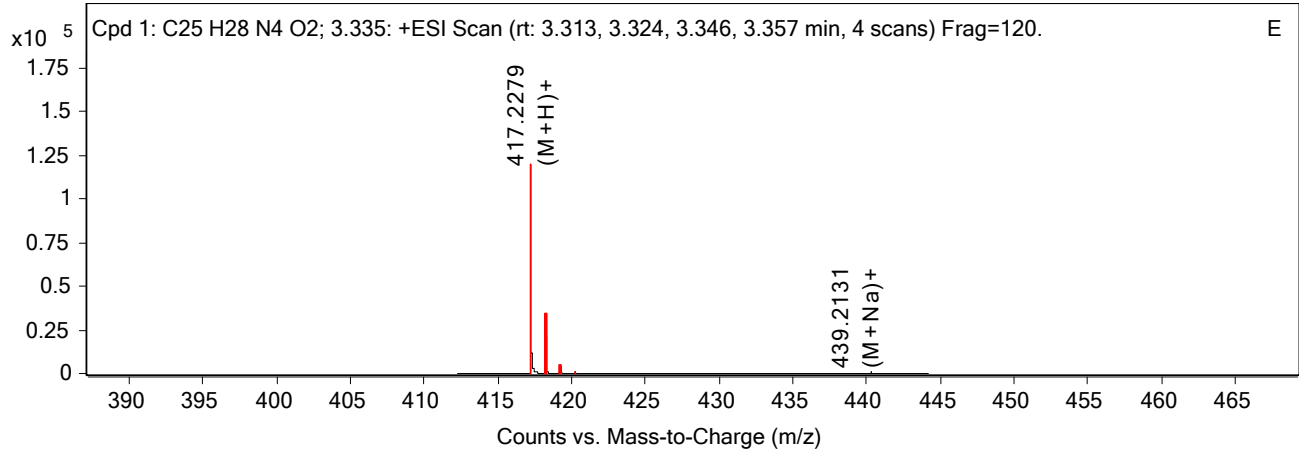

## MS Spectrum Peak List

| Obs. m/z | Charge | Abund     | Ion/Isotope | Tgt Mass Error (ppm) |
|----------|--------|-----------|-------------|----------------------|
| 417.2279 | 1      | 119662.51 | (M+H)+      | 1.45                 |
| 417.2279 |        | 119662.51 |             |                      |
| 418.2308 | 1      | 28702.96  | (M+H)+      | 1.84                 |
| 419.2344 | 1      | 3767.42   | (M+H)+      | 0.13                 |
| 420.2377 | 1      | 500.54    | (M+H)+      | -1.05                |
| 439.2131 | 1      | 388.25    | (M+Na)+     | -5.96                |

--- End Of Report ---

# Target Compound Screening Report

|                                 |                                        |                               |                                                     |
|---------------------------------|----------------------------------------|-------------------------------|-----------------------------------------------------|
| <b>Data File</b>                | 21.d                                   | <b>Sample Name</b>            | H2997945                                            |
| <b>Sample Type</b>              | Sample                                 | <b>Position</b>               | P1-C3                                               |
| <b>Instrument Name</b>          | Instrument 1                           | <b>User Name</b>              | Denis V.Bylina                                      |
| <b>Acq Method</b>               | Fast_Gradient_HRMS_pos_Lock_08272019.m | <b>Acquired Time</b>          | 9/22/2021 3:39:01 PM (UTC+03:00)                    |
| <b>IRM Calibration Status</b>   | Success                                | <b>DA Method</b>              | 1.m                                                 |
| <b>Comment</b>                  |                                        |                               |                                                     |
| <b>Sample Group</b>             |                                        | <b>Info.</b>                  | Agilent 6224 TOF LC/MS                              |
| <b>MFC</b>                      | C25H28N4O3                             | <b>Stream Name</b>            | LC 1                                                |
| <b>Acquisition Time (Local)</b> | 9/22/2021 3:39:01 PM (UTC+03:00)       | <b>Acquisition SW Version</b> | 6200 series TOF/6500 series Q-TOF B.08.00 (B8058.0) |
| <b>TOF Driver Version</b>       | 8.00.00                                | <b>TOF Firmware Version</b>   | 8.643                                               |
| <b>Tune Mass Range Max.</b>     | 1700                                   |                               |                                                     |

## Compound Table

| Label                       | Tgt Score | Mass Error (ppm) | Tgt Formula   | Obs. RT | Ref. Mass | Obs. Mass |
|-----------------------------|-----------|------------------|---------------|---------|-----------|-----------|
| Cpd 1: C25 H28 N4 O3; 3.200 | 96.43     | -1.55            | C25 H28 N4 O3 | 3.2     | 432.2161  | 432.2155  |

| Obs. m/z | Obs. RT | Obs. Mass | Tgt Formula   | Tgt Mass | Tgt Mass Error (ppm) | RT Diff.        | Find Cpds Algorithm |
|----------|---------|-----------|---------------|----------|----------------------|-----------------|---------------------|
| 433.2229 | 3.2     | 432.2155  | C25 H28 N4 O3 | 432.2161 | -1.55                | Find By Formula |                     |

## Compound Chromatograms

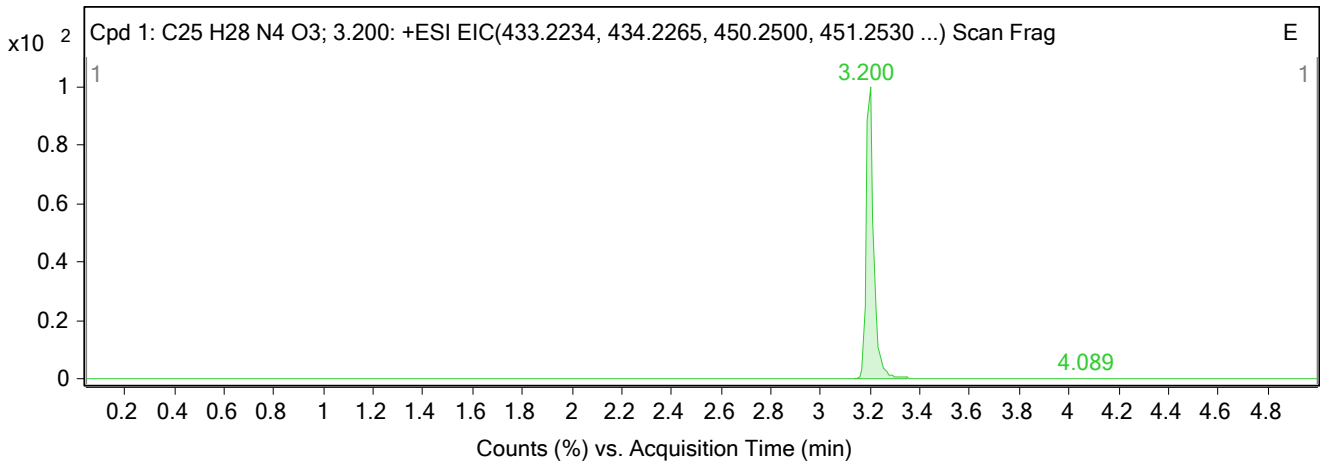

MS Zoomed Spectrum

# Target Compound Screening Report

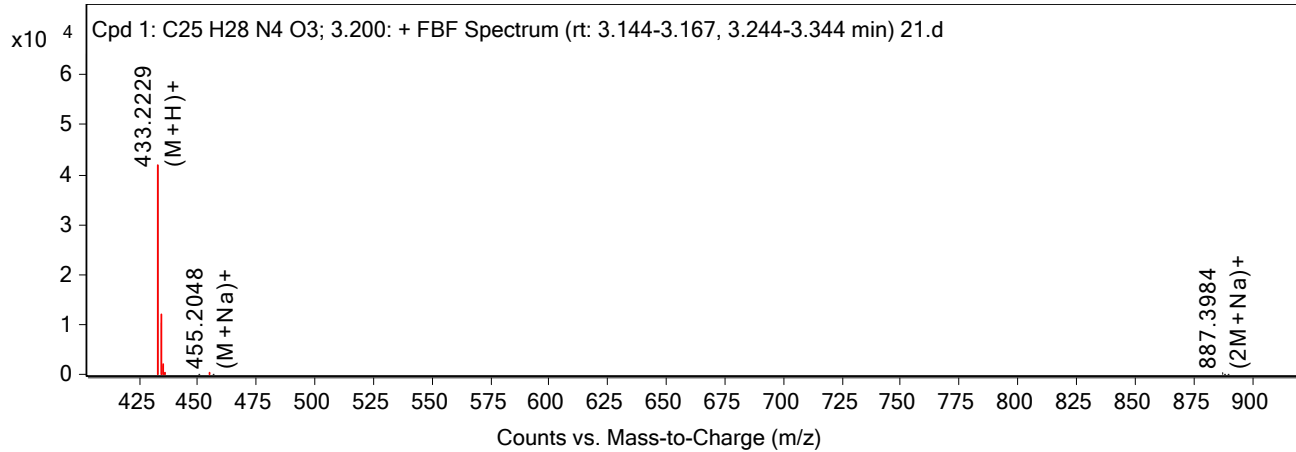

### MS Spectrum Peak List

| Obs. m/z | Charge | Abund    | Ion/Isotope |
|----------|--------|----------|-------------|
| 433.2229 | 1      | 41853.31 | (M+H)+      |
| 434.2259 | 1      | 10243.66 | (M+H)+      |
| 435.2297 | 1      | 1611.19  | (M+H)+      |
| 436.2348 | 1      | 222.14   | (M+H)+      |
| 450.2549 | 1      | 82.17    | (M+NH4)+    |
| 455.2048 | 1      | 236.3    | (M+Na)+     |
| 456.2093 | 1      | 94.59    | (M+Na)+     |
| 887.3984 | 1      | 308.2    | (2M+Na)+    |
| 888.4057 | 1      | 163.63   | (2M+Na)+    |
| 889.4008 | 1      | 85.32    | (2M+Na)+    |

### MS Zoomed Spectrum

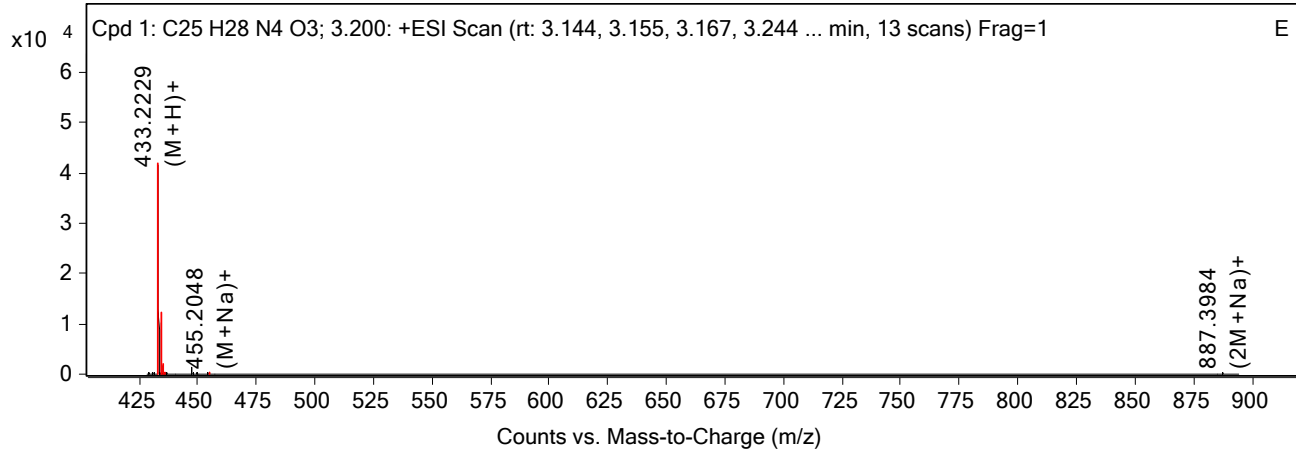

### MS Spectrum Peak List

| Obs. m/z | Charge | Abund    | Ion/Isotope | Tgt Mass Error (ppm) |
|----------|--------|----------|-------------|----------------------|
| 433.2229 | 1      | 41853.31 | (M+H)+      | 1.08                 |
| 434.2259 | 1      | 10243.66 | (M+H)+      | 1.41                 |
| 435.2297 | 1      | 1611.19  | (M+H)+      | -0.85                |
| 436.2348 | 1      | 222.14   | (M+H)+      | -6.39                |
| 450.2549 | 1      | 82.17    | (M+NH4)+    | -10.98               |
| 455.2048 | 1      | 236.3    | (M+Na)+     | 1.33                 |
| 456.2093 | 1      | 94.59    | (M+Na)+     | -1.81                |
| 887.3984 | 1      | 308.2    | (2M+Na)+    | 26.01                |
| 888.4057 | 1      | 163.62   | (2M+Na)+    | 21.27                |
| 889.4008 | 1      | 85.32    | (2M+Na)+    | 29.98                |

--- End Of Report ---

# Target Compound Screening Report

|                                 |                                        |                               |                                                     |
|---------------------------------|----------------------------------------|-------------------------------|-----------------------------------------------------|
| <b>Data File</b>                | 8.d                                    | <b>Sample Name</b>            | H2980200                                            |
| <b>Sample Type</b>              | Sample                                 | <b>Position</b>               | P1-A8                                               |
| <b>Instrument Name</b>          | Instrument 1                           | <b>User Name</b>              | Denis V.Bylina                                      |
| <b>Acq Method</b>               | Fast_Gradient_HRMS_pos_Lock_08272019.m | <b>Acquired Time</b>          | 10/7/2021 5:20:40 PM (UTC+03:00)                    |
| <b>IRM Calibration Status</b>   | Success                                | <b>DA Method</b>              | 1.m                                                 |
| <b>Comment</b>                  |                                        |                               |                                                     |
| <b>Sample Group</b>             |                                        | <b>Info.</b>                  | Agilent 6224 TOF LC/MS                              |
| <b>MFC</b>                      | C26H30N4O2                             | <b>Stream Name</b>            | LC 1                                                |
| <b>Acquisition Time (Local)</b> | 10/7/2021 5:20:40 PM (UTC+03:00)       | <b>Acquisition SW Version</b> | 6200 series TOF/6500 series Q-TOF B.08.00 (B8058.0) |
| <b>TOF Driver Version</b>       | 8.00.00                                | <b>TOF Firmware Version</b>   | 8.643                                               |
| <b>Tune Mass Range Max.</b>     | 1700                                   |                               |                                                     |

## Compound Table

| Label                       | Tgt Score | Mass Error (ppm) | Tgt Formula   | Obs. RT | Ref. Mass | Obs. Mass |
|-----------------------------|-----------|------------------|---------------|---------|-----------|-----------|
| Cpd 1: C26 H30 N4 O2; 3.366 | 96.29     | -0.18            | C26 H30 N4 O2 | 3.366   | 430.2369  | 430.2368  |

| Obs. m/z | Obs. RT | Obs. Mass | Tgt Formula   | Tgt Mass | Tgt Mass Error (ppm) | RT Diff.        | Find Cpds Algorithm |
|----------|---------|-----------|---------------|----------|----------------------|-----------------|---------------------|
| 431.2441 | 3.366   | 430.2368  | C26 H30 N4 O2 | 430.2369 | -0.18                | Find By Formula |                     |

## Compound Chromatograms

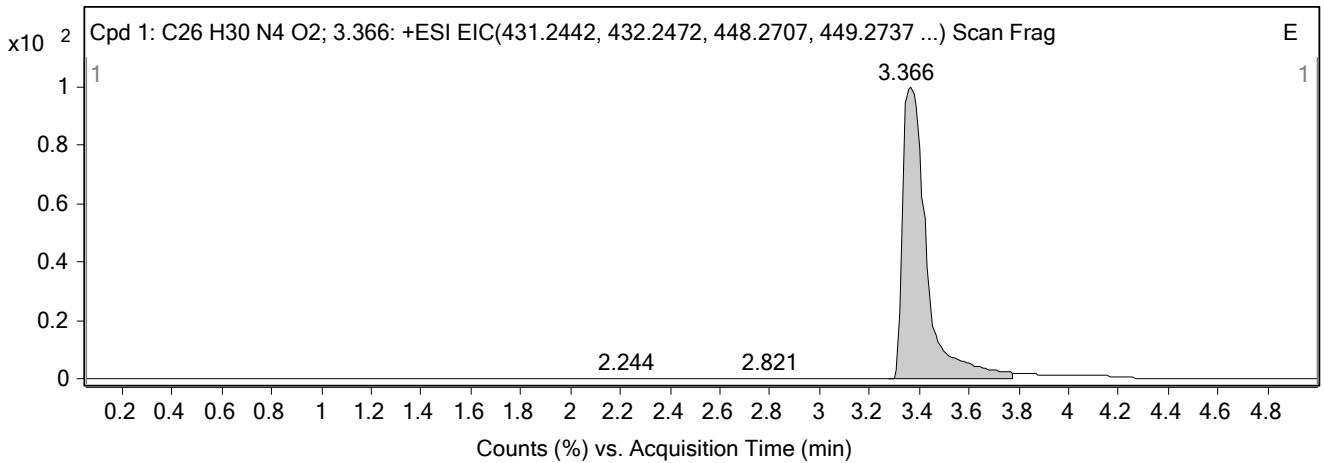

MS Zoomed Spectrum

# Target Compound Screening Report

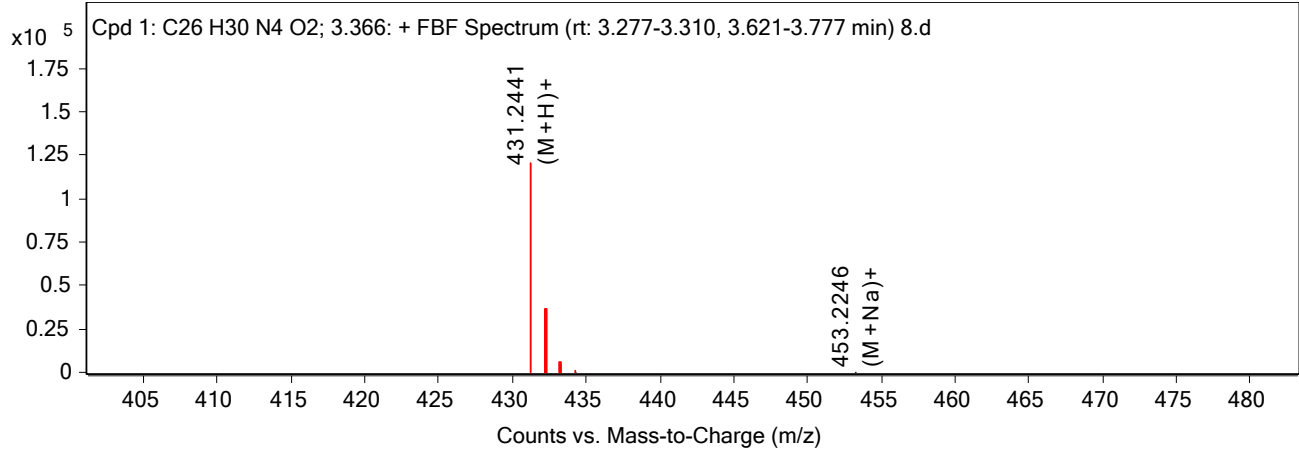

## MS Spectrum Peak List

| Obs. m/z | Charge | Abund    | Ion/Isotope |
|----------|--------|----------|-------------|
| 431.2441 | 1      | 120421.3 | (M+H)+      |
| 432.247  | 1      | 30368.74 | (M+H)+      |
| 433.2499 | 1      | 4328.82  | (M+H)+      |
| 434.253  | 1      | 510.33   | (M+H)+      |
| 453.2246 | 1      | 388.85   | (M+Na)+     |

## MS Zoomed Spectrum

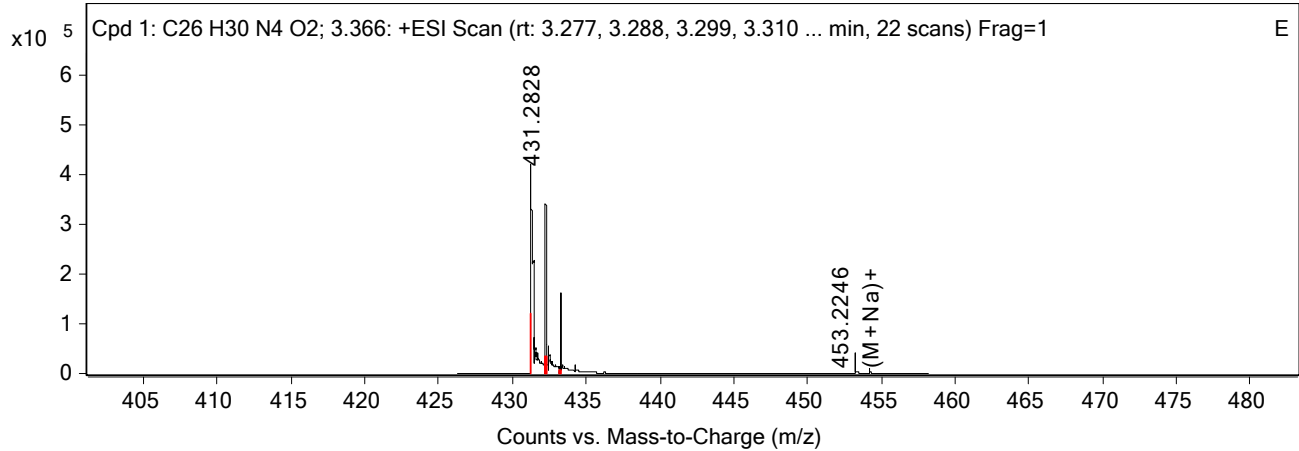

## MS Spectrum Peak List

| Obs. m/z | Charge | Abund     | Ion/Isotope | Tgt Mass Error (ppm) |
|----------|--------|-----------|-------------|----------------------|
| 431.2441 | 1      | 120421.31 | (M+H)+      | 0.04                 |
| 431.2828 |        | 420432.04 |             |                      |
| 432.247  | 1      | 30368.74  | (M+H)+      | 0.65                 |
| 433.2499 | 1      | 4328.82   | (M+H)+      | 0.56                 |
| 434.253  | 1      | 510.33    | (M+H)+      | -0.14                |
| 453.2246 | 1      | 388.85    | (M+Na)+     | 3.27                 |

--- End Of Report ---



# Target Compound Screening Report

|                                 |                                        |                               |                                                     |
|---------------------------------|----------------------------------------|-------------------------------|-----------------------------------------------------|
| <b>Data File</b>                | 5-2.d                                  | <b>Sample Name</b>            | H2978807                                            |
| <b>Sample Type</b>              | Sample                                 | <b>Position</b>               | P1-A5                                               |
| <b>Instrument Name</b>          | Instrument 1                           | <b>User Name</b>              | Denis V.Bylina                                      |
| <b>Acq Method</b>               | Fast_Gradient_HRMS_pos_Lock_08272019.m | <b>Acquired Time</b>          | 9/24/2021 10:32:29 AM (UTC+03:00)                   |
| <b>IRM Calibration Status</b>   | Success                                | <b>DA Method</b>              | 1.m                                                 |
| <b>Comment</b>                  |                                        |                               |                                                     |
| <b>Sample Group</b>             |                                        | <b>Info.</b>                  | Agilent 6224 TOF LC/MS                              |
| <b>MFC</b>                      | C24H24F2N4O2                           | <b>Stream Name</b>            | LC 1                                                |
| <b>Acquisition Time (Local)</b> | 9/24/2021 10:32:29 AM (UTC+03:00)      | <b>Acquisition SW Version</b> | 6200 series TOF/6500 series Q-TOF B.08.00 (B8058.0) |
| <b>TOF Driver Version</b>       | 8.00.00                                | <b>TOF Firmware Version</b>   | 8.643                                               |
| <b>Tune Mass Range Max.</b>     | 1700                                   |                               |                                                     |

## Compound Table

| Label                          | Tgt Score | Mass Error (ppm) | Tgt Formula      | Obs. RT | Ref. Mass | Obs. Mass |
|--------------------------------|-----------|------------------|------------------|---------|-----------|-----------|
| Cpd 1: C24 H24 F2 N4 O2; 3.219 | 96.12     | -1.2             | C24 H24 F2 N4 O2 | 3.219   | 438.1867  | 438.1862  |

| Obs. m/z | Obs. RT | Obs. Mass | Tgt Formula      | Tgt Mass | Tgt Mass Error (ppm) | RT Diff.        | Find Cpds Algorithm |
|----------|---------|-----------|------------------|----------|----------------------|-----------------|---------------------|
| 439.1936 | 3.219   | 438.1862  | C24 H24 F2 N4 O2 | 438.1867 | -1.2                 | Find By Formula |                     |

## Compound Chromatograms

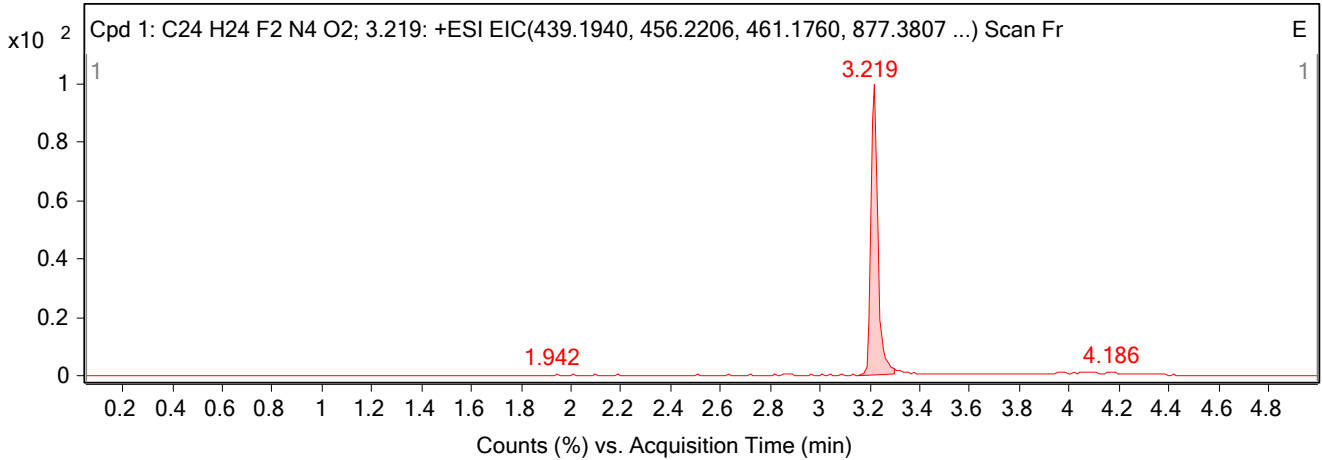

MS Zoomed Spectrum

# Target Compound Screening Report

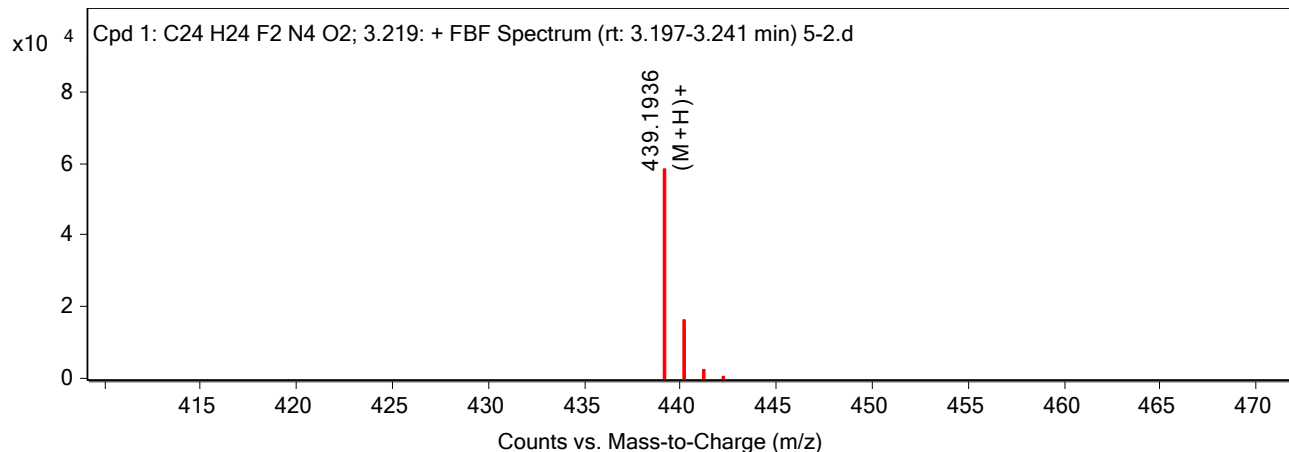

## MS Spectrum Peak List

| Obs. m/z | Charge | Abund    | Ion/Isotope |
|----------|--------|----------|-------------|
| 439.1936 | 1      | 58360.18 | (M+H)+      |
| 440.1962 | 1      | 13594.51 | (M+H)+      |
| 441.1992 | 1      | 1912.09  | (M+H)+      |
| 442.2042 | 1      | 225.78   | (M+H)+      |

## MS Zoomed Spectrum

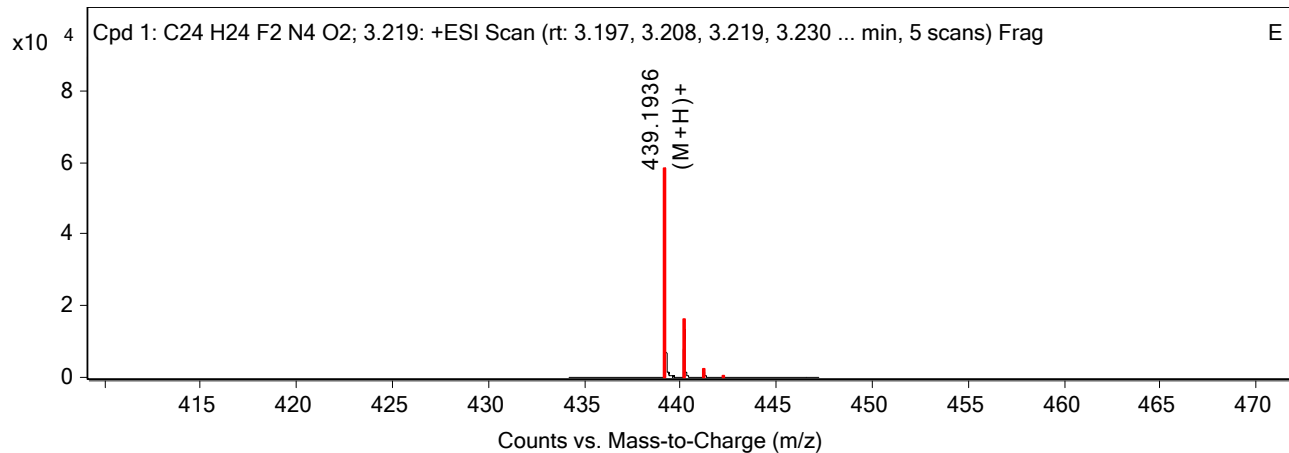

## MS Spectrum Peak List

| Obs. m/z | Charge | Abund    | Ion/Isotope | Tgt Mass Error (ppm) |
|----------|--------|----------|-------------|----------------------|
| 439.1936 | 1      | 58360.18 | (M+H)+      | 1                    |
| 439.1936 |        | 58360.18 |             |                      |
| 440.1962 | 1      | 13594.51 | (M+H)+      | 2.05                 |
| 441.1992 | 1      | 1912.09  | (M+H)+      | 1.59                 |
| 442.2042 | 1      | 225.78   | (M+H)+      | -3.39                |

--- End Of Report ---

# Target Compound Screening Report

|                                 |                                        |                               |                                                     |
|---------------------------------|----------------------------------------|-------------------------------|-----------------------------------------------------|
| <b>Data File</b>                | 50.d                                   | <b>Sample Name</b>            | H2977660                                            |
| <b>Sample Type</b>              | Sample                                 | <b>Position</b>               | P1-F5                                               |
| <b>Instrument Name</b>          | Instrument 1                           | <b>User Name</b>              | Denis V.Bylina                                      |
| <b>Acq Method</b>               | Fast_Gradient_HRMS_pos_Lock_08272019.m | <b>Acquired Time</b>          | 9/22/2021 6:20:08 PM (UTC+03:00)                    |
| <b>IRM Calibration Status</b>   | Success                                | <b>DA Method</b>              | 1.m                                                 |
| <b>Comment</b>                  |                                        |                               |                                                     |
| <b>Sample Group</b>             |                                        | <b>Info.</b>                  | Agilent 6224 TOF LC/MS                              |
| <b>MFC</b>                      | C25H28N4O3                             | <b>Stream Name</b>            | LC 1                                                |
| <b>Acquisition Time (Local)</b> | 9/22/2021 6:20:08 PM (UTC+03:00)       | <b>Acquisition SW Version</b> | 6200 series TOF/6500 series Q-TOF B.08.00 (B8058.0) |
| <b>TOF Driver Version</b>       | 8.00.00                                | <b>TOF Firmware Version</b>   | 8.643                                               |
| <b>Tune Mass Range Max.</b>     | 1700                                   |                               |                                                     |

## Compound Table

| Label                       | Tgt Score | Mass Error (ppm) | Tgt Formula   | Obs. RT | Ref. Mass | Obs. Mass |
|-----------------------------|-----------|------------------|---------------|---------|-----------|-----------|
| Cpd 1: C25 H28 N4 O3; 3.248 | 96.44     | 0.11             | C25 H28 N4 O3 | 3.248   | 432.2161  | 432.2162  |

| Obs. m/z | Obs. RT | Obs. Mass | Tgt Formula   | Tgt Mass | Tgt Mass Error (ppm) | RT Diff.        | Find Cpd Algorithm |
|----------|---------|-----------|---------------|----------|----------------------|-----------------|--------------------|
| 433.2237 | 3.248   | 432.2162  | C25 H28 N4 O3 | 432.2161 | 0.11                 | Find By Formula |                    |

## Compound Chromatograms

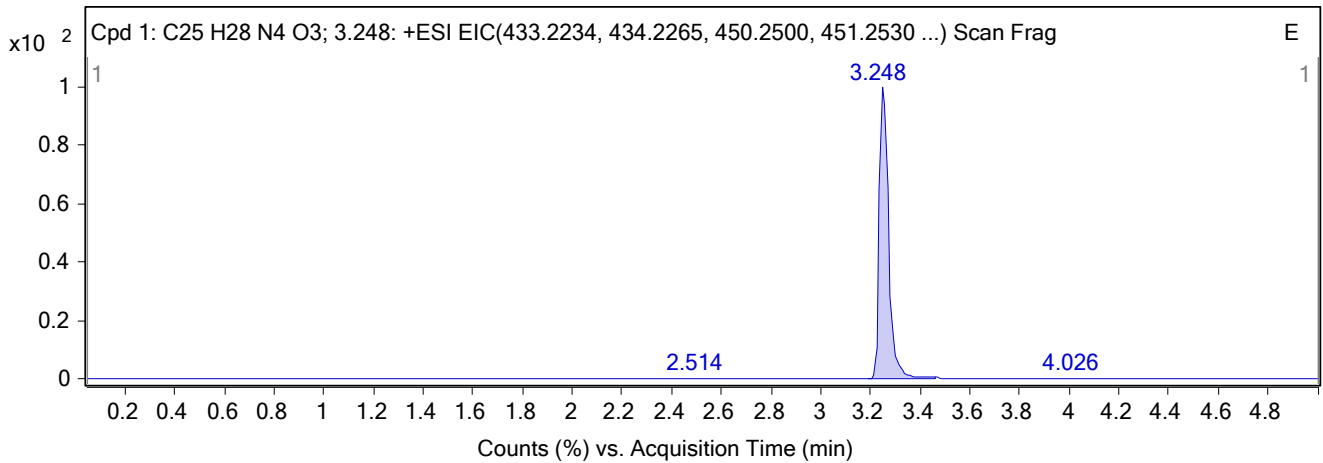

MS Zoomed Spectrum

# Target Compound Screening Report

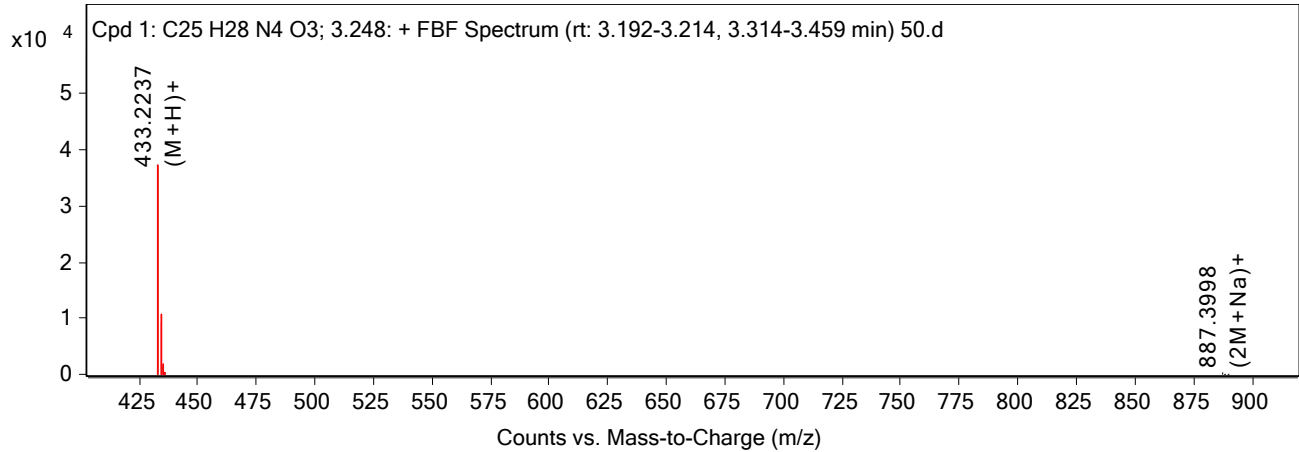

## MS Spectrum Peak List

| Obs. m/z | Charge | Abund    | Ion/Isotope |
|----------|--------|----------|-------------|
| 433.2237 | 1      | 37225.01 | (M+H)+      |
| 434.2268 | 1      | 9077.53  | (M+H)+      |
| 435.2293 | 1      | 1457.09  | (M+H)+      |
| 436.2341 | 1      | 214.63   | (M+H)+      |
| 887.3998 | 1      | 326.1    | (2M+Na)+    |
| 888.404  | 1      | 161.14   | (2M+Na)+    |
| 889.4015 | 1      | 96.45    | (2M+Na)+    |

## MS Zoomed Spectrum

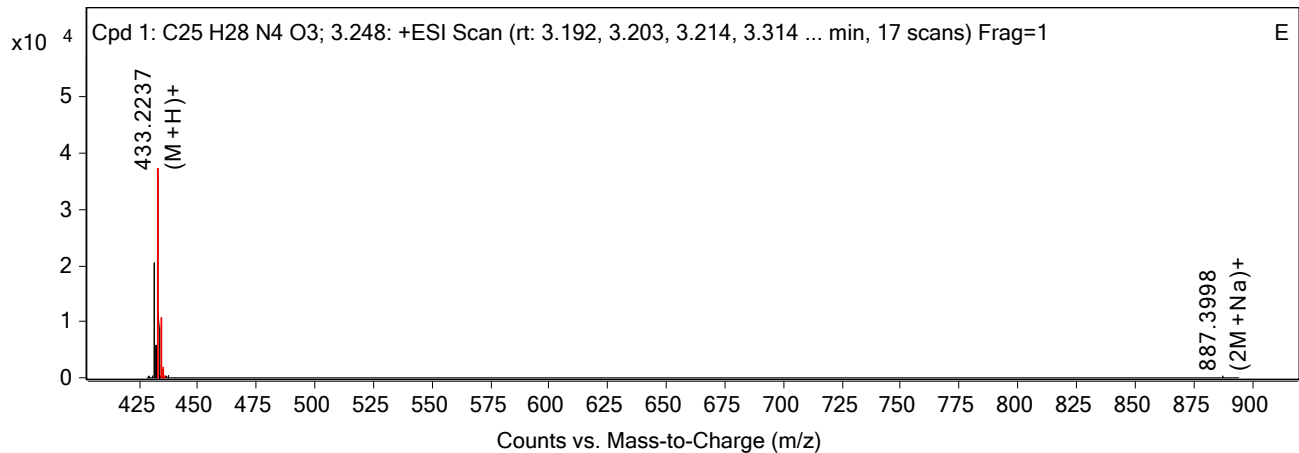

## MS Spectrum Peak List

| Obs. m/z | Charge | Abund    | Ion/Isotope | Tgt Mass Error (ppm) |
|----------|--------|----------|-------------|----------------------|
| 433.2237 | 1      | 37225.01 | (M+H)+      | -0.76                |
| 434.2268 | 1      | 9077.53  | (M+H)+      | -0.62                |
| 435.2293 | 1      | 1457.09  | (M+H)+      | -0.03                |
| 436.2341 | 1      | 214.63   | (M+H)+      | -4.79                |
| 887.3998 | 1      | 326.1    | (2M+Na)+    | 24.43                |
| 888.404  | 1      | 161.14   | (2M+Na)+    | 23.17                |
| 889.4015 | 1      | 96.45    | (2M+Na)+    | 29.23                |

--- End Of Report ---

# Target Compound Screening Report

|                                 |                                        |                               |                                                     |
|---------------------------------|----------------------------------------|-------------------------------|-----------------------------------------------------|
| <b>Data File</b>                | 40.d                                   | <b>Sample Name</b>            | H2982094                                            |
| <b>Sample Type</b>              | Sample                                 | <b>Position</b>               | P1-E4                                               |
| <b>Instrument Name</b>          | Instrument 1                           | <b>User Name</b>              | Denis V.Bylina                                      |
| <b>Acq Method</b>               | Fast_Gradient_HRMS_pos_Lock_08272019.m | <b>Acquired Time</b>          | 9/24/2021 1:51:17 PM (UTC+03:00)                    |
| <b>IRM Calibration Status</b>   | Success                                | <b>DA Method</b>              | 1.m                                                 |
| <b>Comment</b>                  |                                        |                               |                                                     |
| <b>Sample Group</b>             |                                        | <b>Info.</b>                  | Agilent 6224 TOF LC/MS                              |
| <b>MFC</b>                      | C26H32N4O2                             | <b>Stream Name</b>            | LC 1                                                |
| <b>Acquisition Time (Local)</b> | 9/24/2021 1:51:17 PM (UTC+03:00)       | <b>Acquisition SW Version</b> | 6200 series TOF/6500 series Q-TOF B.08.00 (B8058.0) |
| <b>TOF Driver Version</b>       | 8.00.00                                | <b>TOF Firmware Version</b>   | 8.643                                               |
| <b>Tune Mass Range Max.</b>     | 1700                                   |                               |                                                     |

## Compound Table

| Label                       | Tgt Score | Mass Error (ppm) | Tgt Formula   | Obs. RT | Ref. Mass | Obs. Mass |
|-----------------------------|-----------|------------------|---------------|---------|-----------|-----------|
| Cpd 1: C26 H32 N4 O2; 3.402 | 95.34     | -1.51            | C26 H32 N4 O2 | 3.402   | 432.2525  | 432.2519  |

| Obs. m/z | Obs. RT | Obs. Mass | Tgt Formula   | Tgt Mass | Tgt Mass Error (ppm) | RT Diff.        | Find Cpd Algorithm |
|----------|---------|-----------|---------------|----------|----------------------|-----------------|--------------------|
| 433.2591 | 3.402   | 432.2519  | C26 H32 N4 O2 | 432.2525 | -1.51                | Find By Formula |                    |

## Compound Chromatograms

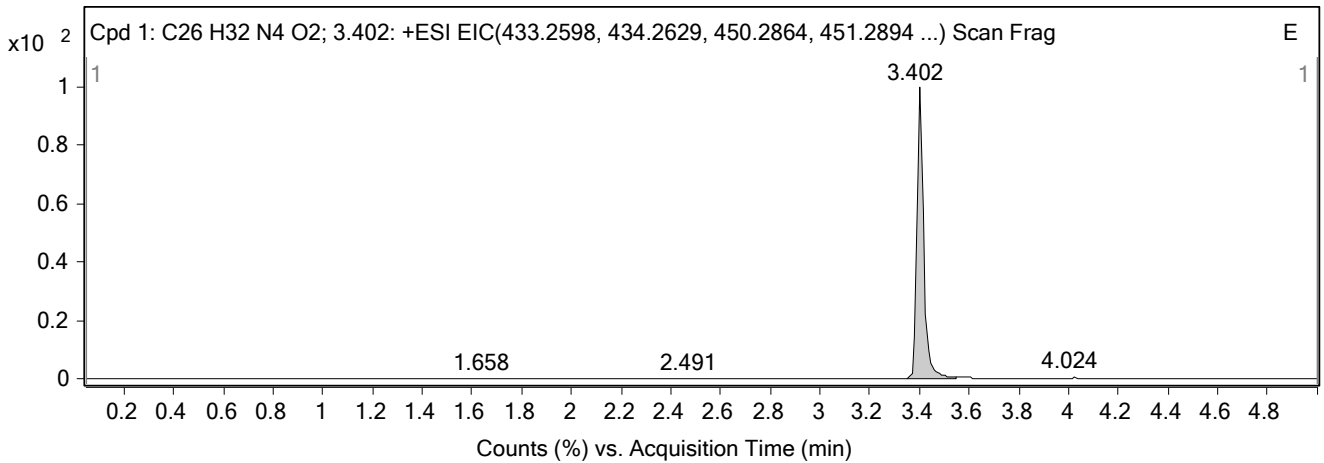

MS Zoomed Spectrum

# Target Compound Screening Report

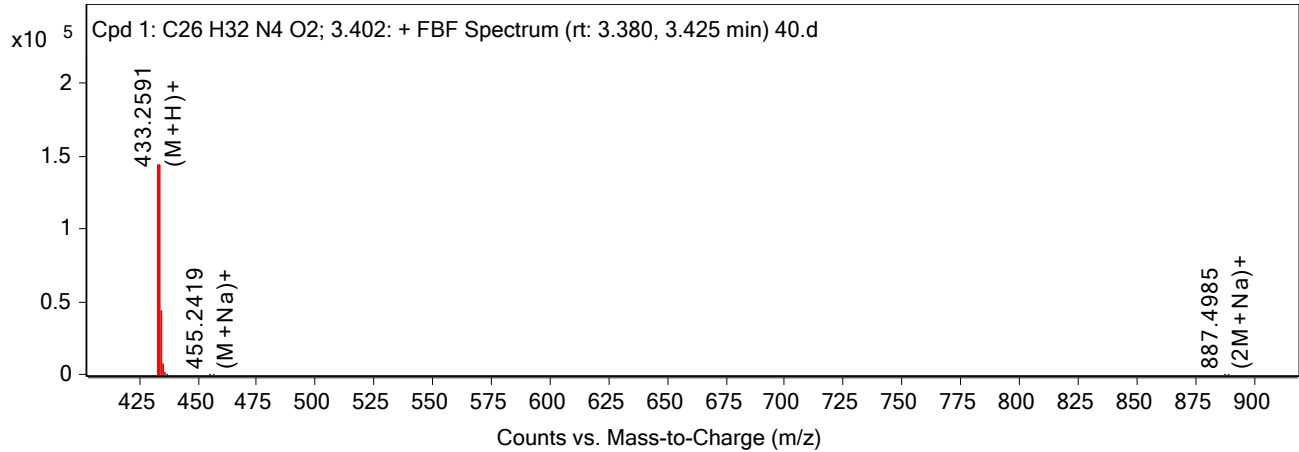

### MS Spectrum Peak List

| Obs. m/z | Charge | Abund     | Ion/Isotope |
|----------|--------|-----------|-------------|
| 433.2591 | 1      | 143286.47 | (M+H)+      |
| 434.262  | 1      | 35737.59  | (M+H)+      |
| 435.2664 | 1      | 5114.85   | (M+H)+      |
| 436.2735 | 1      | 623.79    | (M+H)+      |
| 455.2419 | 1      | 402.62    | (M+Na)+     |
| 456.244  | 1      | 215.25    | (M+Na)+     |
| 887.4985 | 1      | 59.47     | (2M+Na)+    |
| 888.4915 | 1      | 44.03     | (2M+Na)+    |

### MS Zoomed Spectrum

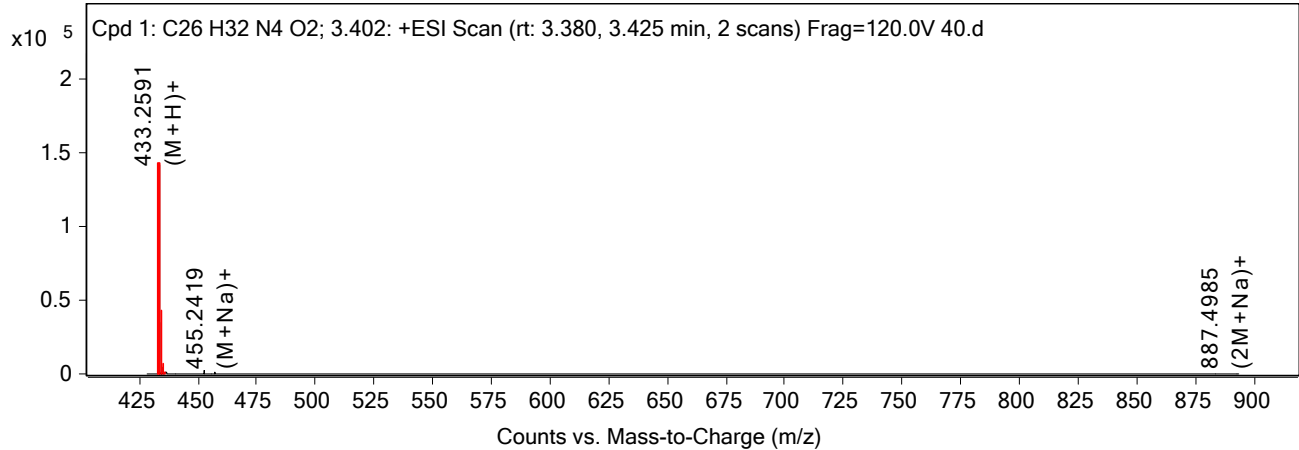

### MS Spectrum Peak List

| Obs. m/z | Charge | Abund     | Ion/Isotope | Tgt Mass Error (ppm) |
|----------|--------|-----------|-------------|----------------------|
| 433.2591 | 1      | 143286.46 | (M+H)+      | 1.52                 |
| 433.2591 | 1      | 143286.46 | (M+H)+      |                      |
| 434.262  | 1      | 35737.59  | (M+H)+      | 2.1                  |
| 435.2664 | 1      | 5114.85   | (M+H)+      | -1.39                |
| 436.2735 | 1      | 623.79    | (M+H)+      | -11.26               |
| 455.2419 | 1      | 402.62    | (M+Na)+     | -0.34                |
| 456.244  | 1      | 215.25    | (M+Na)+     | 1.88                 |
| 887.4985 | 1      | 59.47     | (2M+Na)+    | -4.76                |
| 888.4915 | 1      | 44.03     | (2M+Na)+    | 6.54                 |

--- End Of Report ---

# Target Compound Screening Report

|                                 |                                        |                               |                                                     |
|---------------------------------|----------------------------------------|-------------------------------|-----------------------------------------------------|
| <b>Data File</b>                | 25.d                                   | <b>Sample Name</b>            | H2976997                                            |
| <b>Sample Type</b>              | Sample                                 | <b>Position</b>               | P1-C7                                               |
| <b>Instrument Name</b>          | Instrument 1                           | <b>User Name</b>              | Denis V.Bylina                                      |
| <b>Acq Method</b>               | Fast_Gradient_HRMS_pos_Lock_08272019.m | <b>Acquired Time</b>          | 9/22/2021 4:01:16 PM (UTC+03:00)                    |
| <b>IRM Calibration Status</b>   | Success                                | <b>DA Method</b>              | 1.m                                                 |
| <b>Comment</b>                  |                                        |                               |                                                     |
| <b>Sample Group</b>             |                                        | <b>Info.</b>                  | Agilent 6224 TOF LC/MS                              |
| <b>MFC</b>                      | C27H26N4O2                             | <b>Stream Name</b>            | LC 1                                                |
| <b>Acquisition Time (Local)</b> | 9/22/2021 4:01:16 PM (UTC+03:00)       | <b>Acquisition SW Version</b> | 6200 series TOF/6500 series Q-TOF B.08.00 (B8058.0) |
| <b>TOF Driver Version</b>       | 8.00.00                                | <b>TOF Firmware Version</b>   | 8.643                                               |
| <b>Tune Mass Range Max.</b>     | 1700                                   |                               |                                                     |

## Compound Table

| Label                       | Tgt Score | Mass Error (ppm) | Tgt Formula   | Obs. RT | Ref. Mass | Obs. Mass |
|-----------------------------|-----------|------------------|---------------|---------|-----------|-----------|
| Cpd 1: C27 H26 N4 O2; 3.360 | 96.9      | -0.35            | C27 H26 N4 O2 | 3.36    | 438.2056  | 438.2054  |

| Obs. m/z | Obs. RT | Obs. Mass | Tgt Formula   | Tgt Mass | Tgt Mass Error (ppm) | RT Diff.        | Find Cpds Algorithm |
|----------|---------|-----------|---------------|----------|----------------------|-----------------|---------------------|
| 439.2126 | 3.36    | 438.2054  | C27 H26 N4 O2 | 438.2056 | -0.35                | Find By Formula |                     |

## Compound Chromatograms

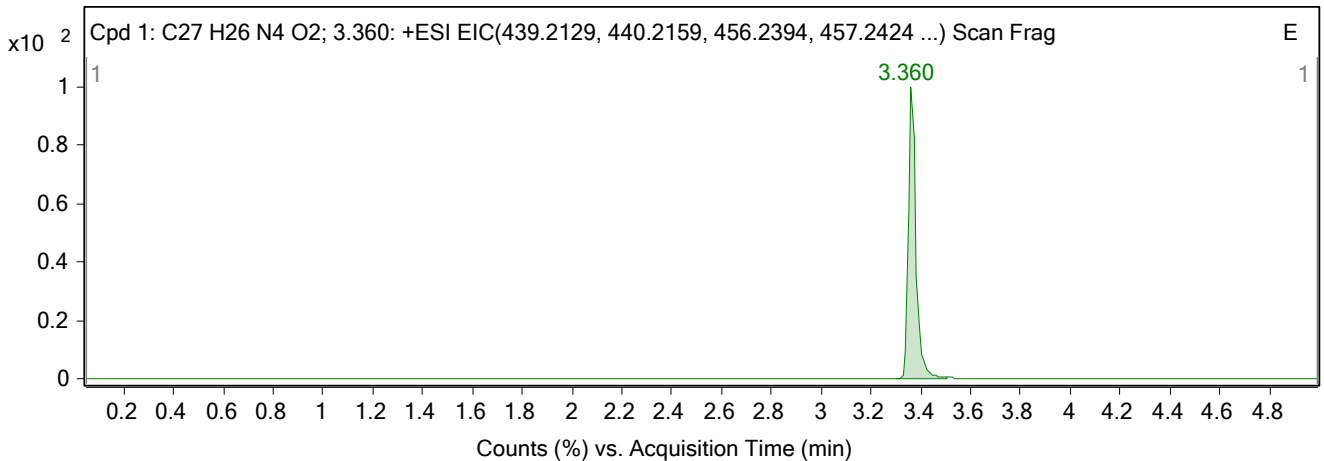

MS Zoomed Spectrum

# Target Compound Screening Report

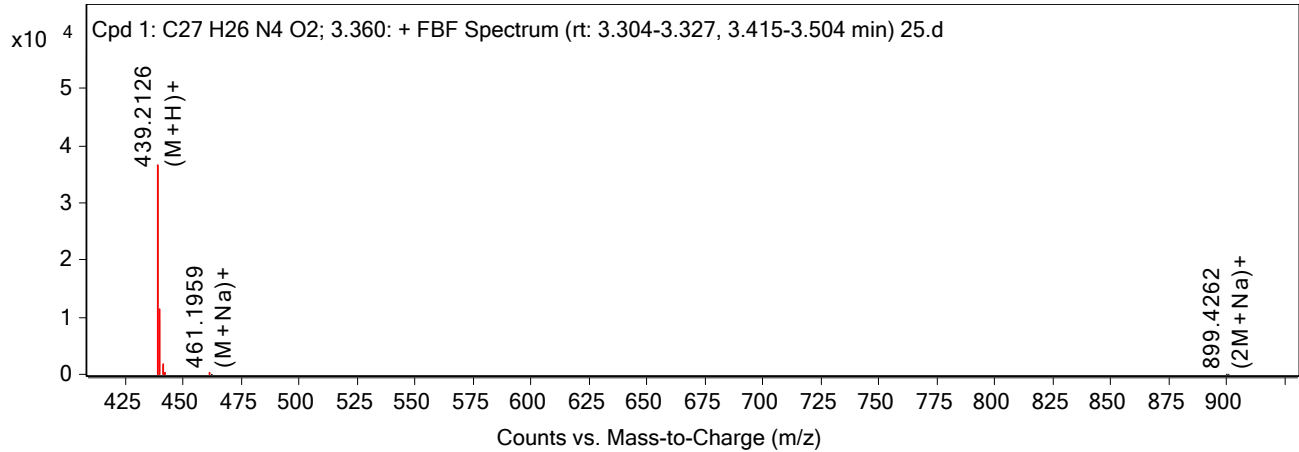

## MS Spectrum Peak List

| Obs. m/z | Charge | Abund    | Ion/Isotope |
|----------|--------|----------|-------------|
| 439.2126 | 1      | 36512.76 | (M+H)+      |
| 440.2157 | 1      | 9708.31  | (M+H)+      |
| 441.2184 | 1      | 1520.41  | (M+H)+      |
| 442.2188 | 1      | 185.88   | (M+H)+      |
| 461.1959 | 1      | 387.07   | (M+Na)+     |
| 462.2024 | 1      | 143.77   | (M+Na)+     |
| 899.4262 | 1      | 77.54    | (2M+Na)+    |
| 900.4336 | 1      | 45.83    | (2M+Na)+    |

## MS Zoomed Spectrum

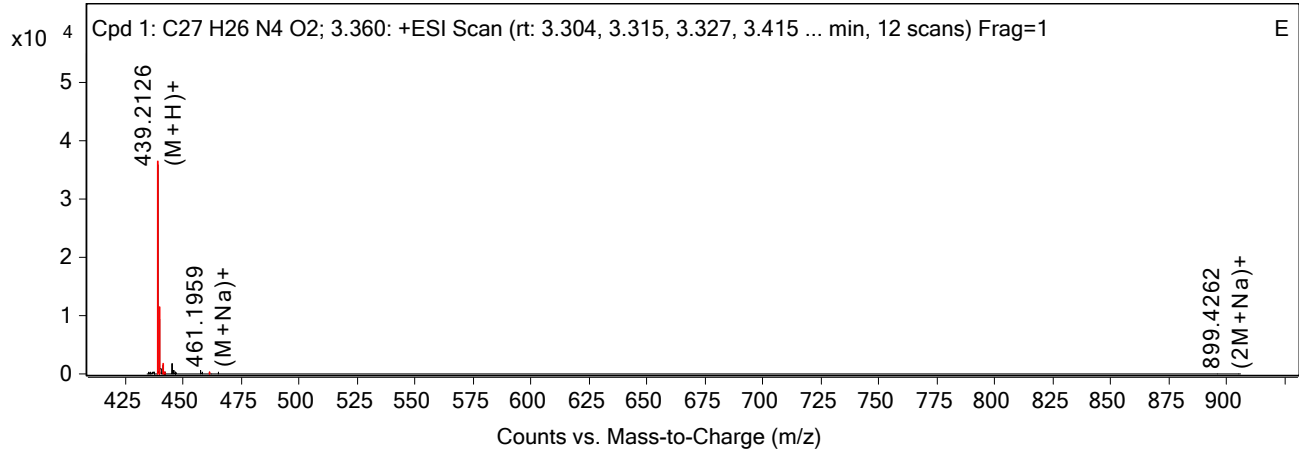

## MS Spectrum Peak List

| Obs. m/z | Charge | Abund    | Ion/Isotope | Tgt Mass Error (ppm) |
|----------|--------|----------|-------------|----------------------|
| 439.2126 | 1      | 36512.76 | (M+H)+      | 0.53                 |
| 440.2157 | 1      | 9708.31  | (M+H)+      | 0.53                 |
| 441.2184 | 1      | 1520.41  | (M+H)+      | 0.96                 |
| 442.2188 | 1      | 185.88   | (M+H)+      | 6.48                 |
| 461.1959 | 1      | 387.07   | (M+Na)+     | -2.3                 |
| 462.2024 | 1      | 143.77   | (M+Na)+     | -9.66                |
| 899.4262 | 1      | 77.54    | (2M+Na)+    | -28.77               |
| 900.4336 | 1      | 45.83    | (2M+Na)+    | -33.45               |

--- End Of Report ---



# Target Compound Screening Report

|                                 |                                        |                               |                                                     |
|---------------------------------|----------------------------------------|-------------------------------|-----------------------------------------------------|
| <b>Data File</b>                | 46.d                                   | <b>Sample Name</b>            | p211701\$2                                          |
| <b>Sample Type</b>              | Sample                                 | <b>Position</b>               | P1-F1                                               |
| <b>Instrument Name</b>          | Instrument 1                           | <b>User Name</b>              | Denis V.Bylina                                      |
| <b>Acq Method</b>               | Fast_Gradient_HRMS_pos_Lock_08272019.m | <b>Acquired Time</b>          | 9/23/2021 11:03:06 PM (UTC+03:00)                   |
| <b>IRM Calibration Status</b>   | Success                                | <b>DA Method</b>              | 1.m                                                 |
| <b>Comment</b>                  |                                        |                               |                                                     |
| <b>Sample Group</b>             |                                        | <b>Info.</b>                  | Agilent 6224 TOF LC/MS                              |
| <b>MFC</b>                      | C26H26FN3O3                            | <b>Stream Name</b>            | LC 1                                                |
| <b>Acquisition Time (Local)</b> | 9/23/2021 11:03:06 PM (UTC+03:00)      | <b>Acquisition SW Version</b> | 6200 series TOF/6500 series Q-TOF B.08.00 (B8058.0) |
| <b>TOF Driver Version</b>       | 8.00.00                                | <b>TOF Firmware Version</b>   | 8.643                                               |
| <b>Tune Mass Range Max.</b>     | 1700                                   |                               |                                                     |

## Compound Table

| Label                         | Tgt Score | Mass Error (ppm) | Tgt Formula     | Obs. RT | Ref. Mass | Obs. Mass |
|-------------------------------|-----------|------------------|-----------------|---------|-----------|-----------|
| Cpd 1: C26 H26 F N3 O3; 2.733 | 97.53     | -2.21            | C26 H26 F N3 O3 | 2.733   | 447.1958  | 447.1948  |

| Obs. m/z | Obs. RT | Obs. Mass | Tgt Formula     | Tgt Mass | Tgt Mass Error (ppm) | RT Diff.        | Find Cps Algorithm |
|----------|---------|-----------|-----------------|----------|----------------------|-----------------|--------------------|
| 448.2022 | 2.733   | 447.1948  | C26 H26 F N3 O3 | 447.1958 | -2.21                | Find By Formula |                    |

## Compound Chromatograms

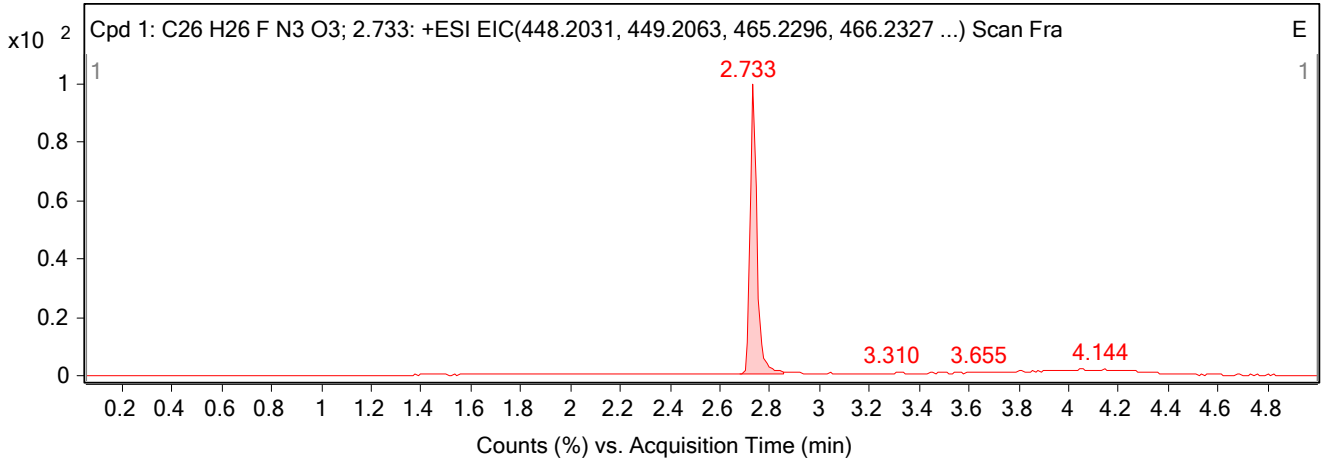

MS Zoomed Spectrum

# Target Compound Screening Report

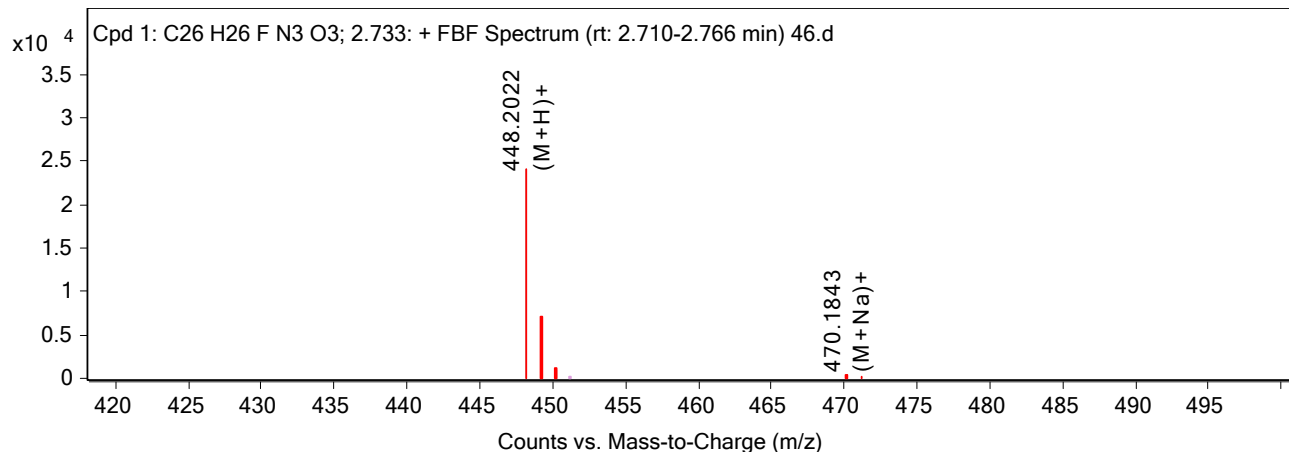

## MS Spectrum Peak List

| Obs. m/z | Charge | Abund   | Ion/Isotope |
|----------|--------|---------|-------------|
| 448.2022 | 1      | 24051.2 | (M+H)+      |
| 449.205  | 1      | 6419.56 | (M+H)+      |
| 450.2086 | 1      | 1003.35 | (M+H)+      |
| 470.1843 | 1      | 350.11  | (M+Na)+     |
| 471.1823 | 1      | 113.31  | (M+Na)+     |

## MS Zoomed Spectrum

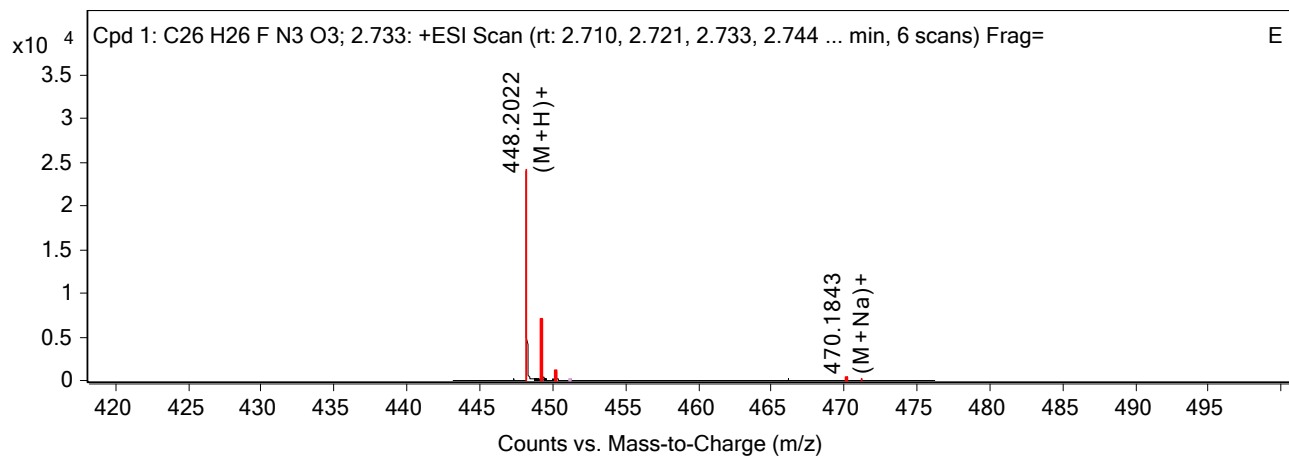

## MS Spectrum Peak List

| Obs. m/z | Charge | Abund   | Ion/Isotope | Tgt Mass Error (ppm) |
|----------|--------|---------|-------------|----------------------|
| 448.2022 | 1      | 24051.2 | (M+H)+      | 2.05                 |
| 448.2022 |        | 24051.2 |             |                      |
| 449.205  | 1      | 6419.56 | (M+H)+      | 2.75                 |
| 450.2086 | 1      | 1003.35 | (M+H)+      | 1.28                 |
| 470.1843 | 1      | 350.11  | (M+Na)+     | 1.55                 |
| 471.1823 | 1      | 113.31  | (M+Na)+     | 12.52                |

--- End Of Report ---

# Target Compound Screening Report

|                                 |                                        |                               |                                                     |
|---------------------------------|----------------------------------------|-------------------------------|-----------------------------------------------------|
| <b>Data File</b>                | 30.d                                   | <b>Sample Name</b>            | H2977004                                            |
| <b>Sample Type</b>              | Sample                                 | <b>Position</b>               | P1-D3                                               |
| <b>Instrument Name</b>          | Instrument 1                           | <b>User Name</b>              | Denis V.Bylina                                      |
| <b>Acq Method</b>               | Fast_Gradient_HRMS_pos_Lock_08272019.m | <b>Acquired Time</b>          | 9/22/2021 4:29:02 PM (UTC+03:00)                    |
| <b>IRM Calibration Status</b>   | Success                                | <b>DA Method</b>              | 1.m                                                 |
| <b>Comment</b>                  |                                        |                               |                                                     |
| <b>Sample Group</b>             |                                        | <b>Info.</b>                  | Agilent 6224 TOF LC/MS                              |
| <b>MFC</b>                      | C27H26N4O2                             | <b>Stream Name</b>            | LC 1                                                |
| <b>Acquisition Time (Local)</b> | 9/22/2021 4:29:02 PM (UTC+03:00)       | <b>Acquisition SW Version</b> | 6200 series TOF/6500 series Q-TOF B.08.00 (B8058.0) |
| <b>TOF Driver Version</b>       | 8.00.00                                | <b>TOF Firmware Version</b>   | 8.643                                               |
| <b>Tune Mass Range Max.</b>     | 1700                                   |                               |                                                     |

### Compound Table

| Label                       | Tgt Score | Mass Error (ppm) | Tgt Formula   | Obs. RT | Ref. Mass | Obs. Mass |
|-----------------------------|-----------|------------------|---------------|---------|-----------|-----------|
| Cpd 1: C27 H26 N4 O2; 3.435 | 97.5      | -2.24            | C27 H26 N4 O2 | 3.435   | 438.2056  | 438.2046  |

| Obs. m/z | Obs. RT | Obs. Mass | Tgt Formula   | Tgt Mass | Tgt Mass Error (ppm) | RT Diff.        | Find Cpds Algorithm |
|----------|---------|-----------|---------------|----------|----------------------|-----------------|---------------------|
| 899.3999 | 3.435   | 438.2046  | C27 H26 N4 O2 | 438.2056 | -2.24                | Find By Formula |                     |

### Compound Chromatograms

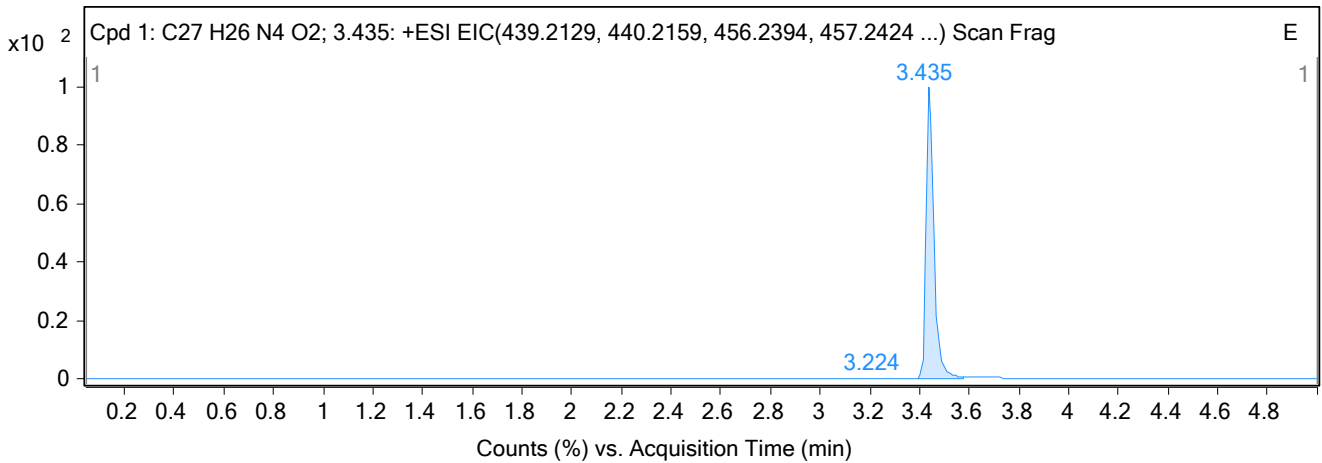

MS Zoomed Spectrum

# Target Compound Screening Report

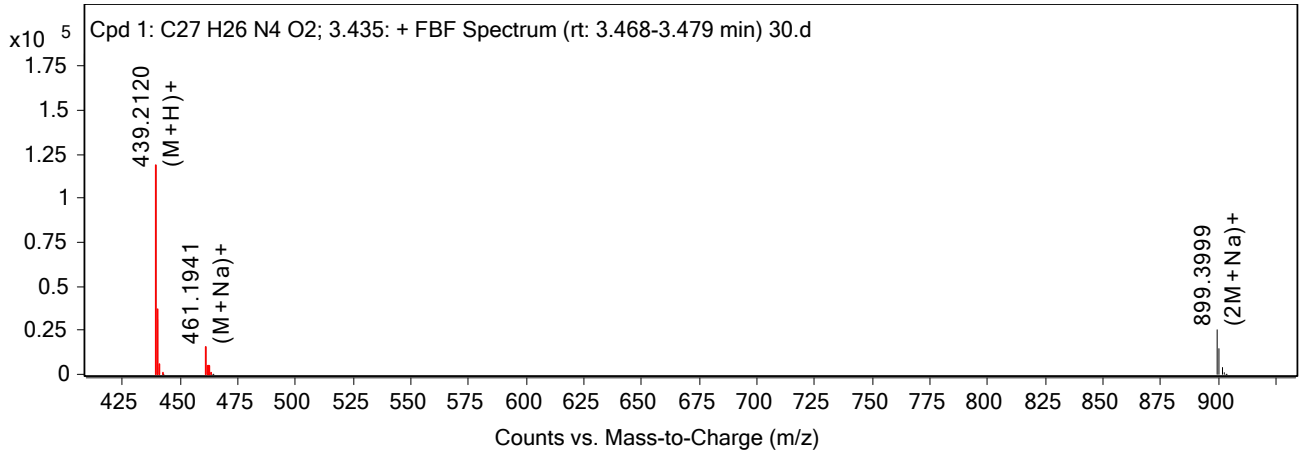

## MS Spectrum Peak List

| Obs. m/z | Charge | Abund     | Ion/Isotope |
|----------|--------|-----------|-------------|
| 439.212  | 1      | 118738.65 | (M+H)+      |
| 440.215  | 1      | 30928.34  | (M+H)+      |
| 441.2181 | 1      | 4228.78   | (M+H)+      |
| 461.1941 | 1      | 15278.77  | (M+Na)+     |
| 462.196  | 1      | 4237.02   | (M+Na)+     |
| 463.1983 | 1      | 792.37    | (M+Na)+     |
| 899.3999 | 1      | 25191.49  | (2M+Na)+    |
| 900.4017 | 1      | 14736.32  | (2M+Na)+    |
| 901.4032 | 1      | 4326.79   | (2M+Na)+    |
| 902.406  | 1      | 1160.61   | (2M+Na)+    |

## MS Zoomed Spectrum

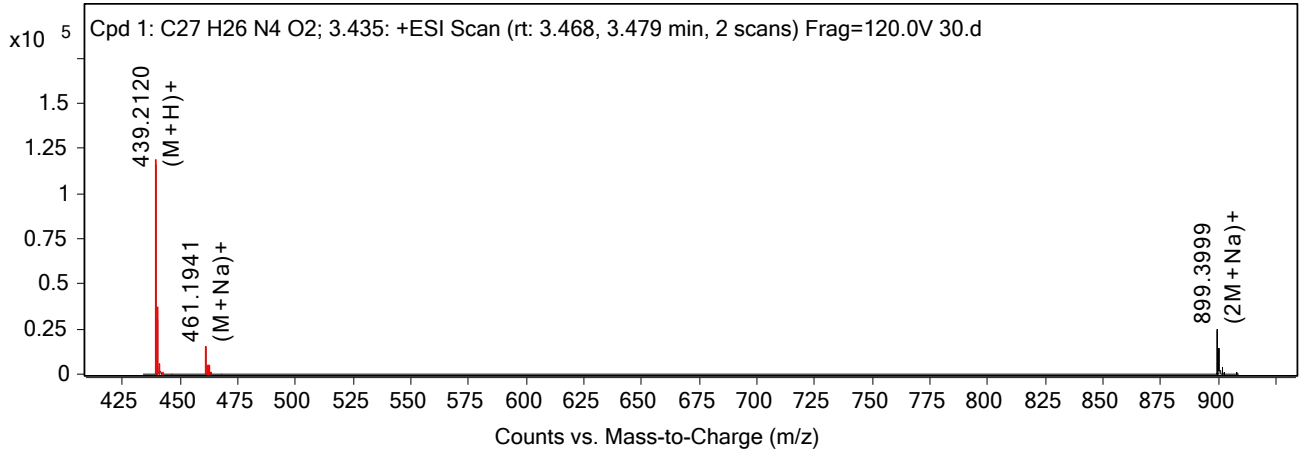

## MS Spectrum Peak List

| Obs. m/z | Charge | Abund     | Ion/Isotope | Tgt Mass Error (ppm) |
|----------|--------|-----------|-------------|----------------------|
| 439.212  | 1      | 118738.65 | (M+H)+      | 2                    |
| 440.215  | 1      | 30928.34  | (M+H)+      | 2.16                 |
| 441.2181 | 1      | 4228.78   | (M+H)+      | 1.68                 |
| 461.1941 | 1      | 15278.77  | (M+Na)+     | 1.56                 |
| 462.196  | 1      | 4237.02   | (M+Na)+     | 4.13                 |
| 463.1983 | 1      | 792.37    | (M+Na)+     | 5.34                 |
| 899.3999 | 1      | 25191.49  | (2M+Na)+    | 0.54                 |
| 900.4017 | 1      | 14736.32  | (2M+Na)+    | 1.96                 |
| 901.4032 | 1      | 4326.79   | (2M+Na)+    | 3.6                  |
| 902.406  | 1      | 1160.61   | (2M+Na)+    | 3.8                  |

--- End Of Report ---

# Target Compound Screening Report

|                                 |                                        |                               |                                                     |
|---------------------------------|----------------------------------------|-------------------------------|-----------------------------------------------------|
| <b>Data File</b>                | 46.d                                   | <b>Sample Name</b>            | H1661306                                            |
| <b>Sample Type</b>              | Sample                                 | <b>Position</b>               | P1-F1                                               |
| <b>Instrument Name</b>          | Instrument 1                           | <b>User Name</b>              | Denis V.Bylina                                      |
| <b>Acq Method</b>               | Fast_Gradient_HRMS_pos_Lock_08272019.m | <b>Acquired Time</b>          | 9/23/2021 3:26:31 PM (UTC+03:00)                    |
| <b>IRM Calibration Status</b>   | Success                                | <b>DA Method</b>              | 1.m                                                 |
| <b>Comment</b>                  |                                        |                               |                                                     |
| <b>Sample Group</b>             |                                        | <b>Info.</b>                  | Agilent 6224 TOF LC/MS                              |
| <b>MFC</b>                      | C19H17Cl2N5O3                          | <b>Stream Name</b>            | LC 1                                                |
| <b>Acquisition Time (Local)</b> | 9/23/2021 3:26:31 PM (UTC+03:00)       | <b>Acquisition SW Version</b> | 6200 series TOF/6500 series Q-TOF B.08.00 (B8058.0) |
| <b>TOF Driver Version</b>       | 8.00.00                                | <b>TOF Firmware Version</b>   | 8.643                                               |
| <b>Tune Mass Range Max.</b>     | 1700                                   |                               |                                                     |

## Compound Table

| Label                           | Tgt Score | Mass Error (ppm) | Tgt Formula       | Obs. RT | Ref. Mass | Obs. Mass |
|---------------------------------|-----------|------------------|-------------------|---------|-----------|-----------|
| Cpd 1: C19 H17 Cl2 N5 O3; 2.586 | 97.95     | -0.67            | C19 H17 Cl2 N5 O3 | 2.586   | 433.0708  | 433.0706  |

| Obs. m/z | Obs. RT | Obs. Mass | Tgt Formula       | Tgt Mass | Tgt Mass Error (ppm) | RT Diff.        | Find Cpd Algorithm |
|----------|---------|-----------|-------------------|----------|----------------------|-----------------|--------------------|
| 891.1273 | 2.586   | 433.0706  | C19 H17 Cl2 N5 O3 | 433.0708 | -0.67                | Find By Formula |                    |

## Compound Chromatograms

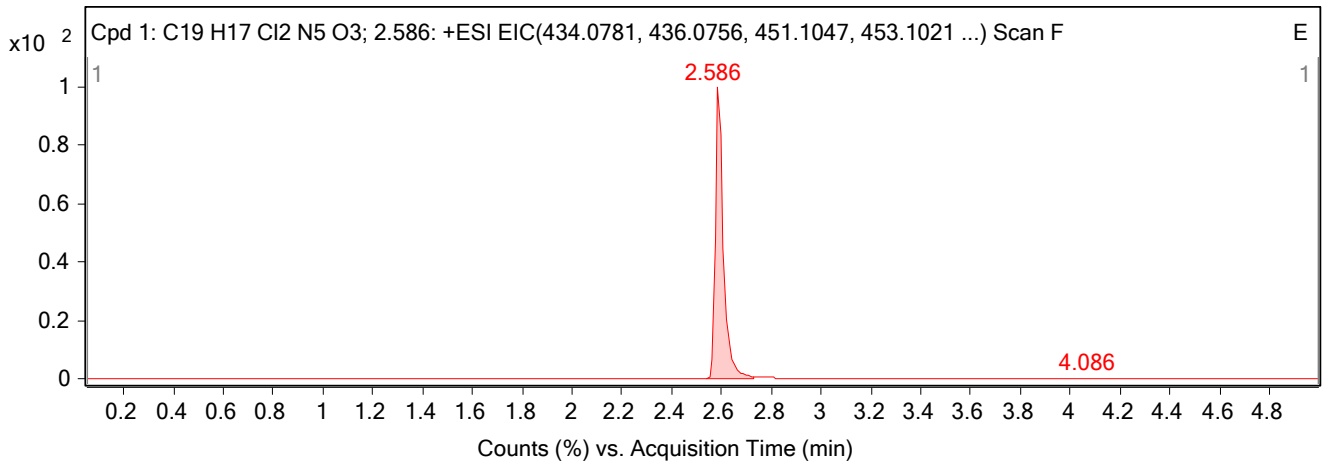

## MS Zoomed Spectrum

# Target Compound Screening Report

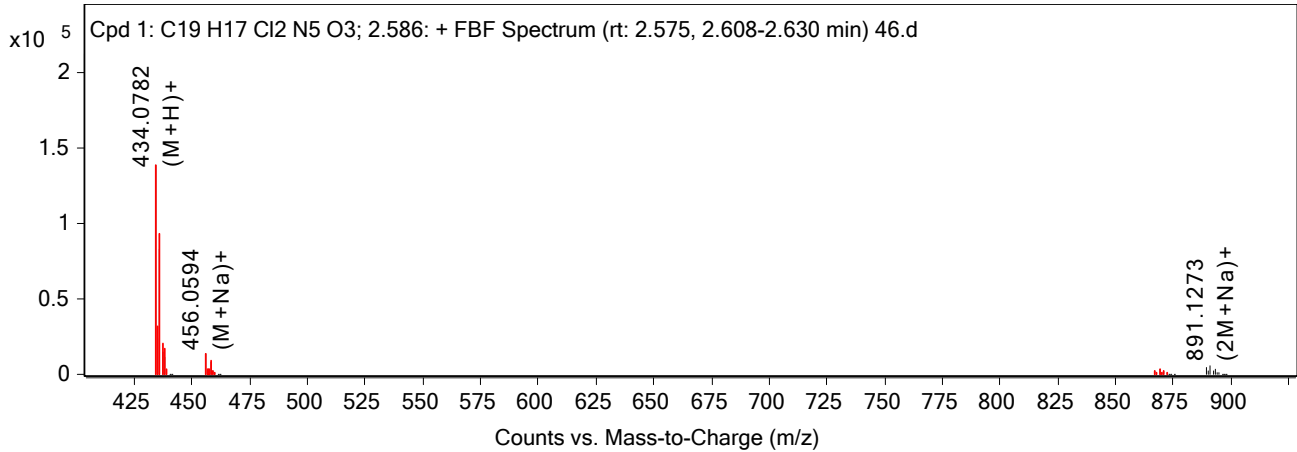

## MS Spectrum Peak List

| Obs. m/z | Charge | Abund     | Ion/Isotope |
|----------|--------|-----------|-------------|
| 434.0782 | 1      | 138737.61 | (M+H)+      |
| 435.0807 | 1      | 24407.09  | (M+H)+      |
| 436.0756 | 1      | 83734.3   | (M+H)+      |
| 437.0779 | 1      | 15014.28  | (M+H)+      |
| 438.0734 | 1      | 11507.3   | (M+H)+      |
| 456.0594 | 1      | 13263.06  | (M+Na)+     |
| 458.0569 | 1      | 7998.1    | (M+Na)+     |
| 869.1443 | 1      | 3375.26   | (2M+H)+     |
| 889.1287 | 1      | 4089.35   | (2M+Na)+    |
| 891.1273 | 1      | 5900.84   | (2M+Na)+    |

## MS Zoomed Spectrum

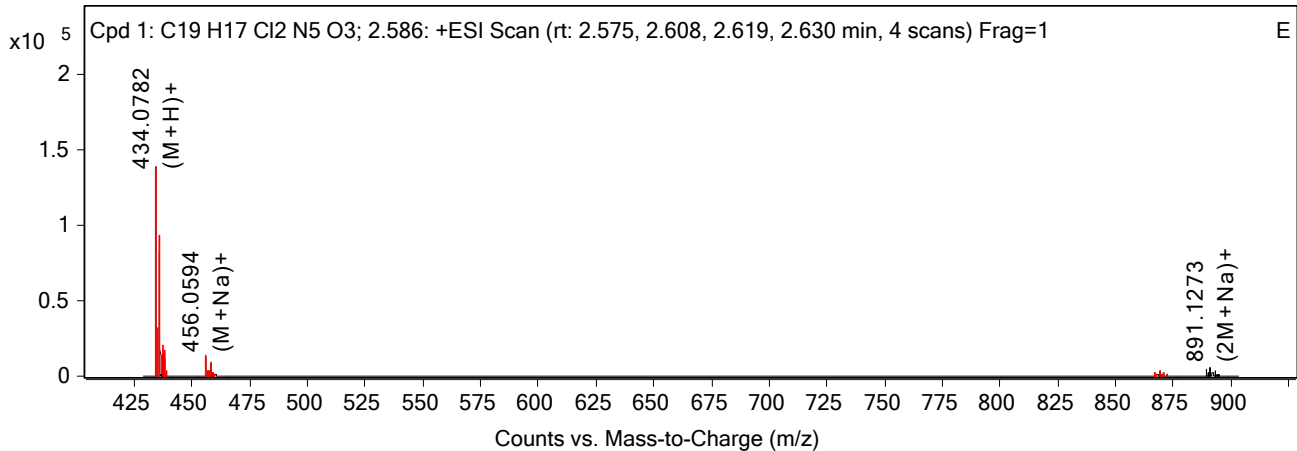

## MS Spectrum Peak List

| Obs. m/z | Charge | Abund     | Ion/Isotope | Tgt Mass Error (ppm) |
|----------|--------|-----------|-------------|----------------------|
| 434.0782 | 1      | 138737.61 | (M+H)+      | -0.15                |
| 435.0807 | 1      | 24407.09  | (M+H)+      | 0.67                 |
| 436.0756 | 1      | 83734.3   | (M+H)+      | -0.13                |
| 437.0779 | 1      | 15014.28  | (M+H)+      | 0.7                  |
| 438.0734 | 1      | 11507.3   | (M+H)+      | 0.39                 |
| 456.0594 | 1      | 13263.06  | (M+Na)+     | 1.44                 |
| 458.0569 | 1      | 7998.1    | (M+Na)+     | 1.36                 |
| 869.1443 | 1      | 3375.26   | (2M+H)+     | 2.72                 |
| 889.1287 | 1      | 4089.35   | (2M+Na)+    | 2.46                 |
| 891.1273 | 1      | 5900.84   | (2M+Na)+    | 1.47                 |

--- End Of Report ---

# Target Compound Screening Report

|                                 |                                        |                               |                                                     |
|---------------------------------|----------------------------------------|-------------------------------|-----------------------------------------------------|
| <b>Data File</b>                | 34.d                                   | <b>Sample Name</b>            | H1660633                                            |
| <b>Sample Type</b>              | Sample                                 | <b>Position</b>               | P1-D7                                               |
| <b>Instrument Name</b>          | Instrument 1                           | <b>User Name</b>              | Denis V.Bylina                                      |
| <b>Acq Method</b>               | Fast_Gradient_HRMS_pos_Lock_08272019.m | <b>Acquired Time</b>          | 9/23/2021 2:19:56 PM (UTC+03:00)                    |
| <b>IRM Calibration Status</b>   | Success                                | <b>DA Method</b>              | 1.m                                                 |
| <b>Comment</b>                  |                                        |                               |                                                     |
| <b>Sample Group</b>             |                                        | <b>Info.</b>                  | Agilent 6224 TOF LC/MS                              |
| <b>MFC</b>                      | C19H31N5O4S                            | <b>Stream Name</b>            | LC 1                                                |
| <b>Acquisition Time (Local)</b> | 9/23/2021 2:19:56 PM (UTC+03:00)       | <b>Acquisition SW Version</b> | 6200 series TOF/6500 series Q-TOF B.08.00 (B8058.0) |
| <b>TOF Driver Version</b>       | 8.00.00                                | <b>TOF Firmware Version</b>   | 8.643                                               |
| <b>Tune Mass Range Max.</b>     | 1700                                   |                               |                                                     |

## Compound Table

| Label                         | Tgt Score | Mass Error (ppm) | Tgt Formula     | Obs. RT | Ref. Mass | Obs. Mass |
|-------------------------------|-----------|------------------|-----------------|---------|-----------|-----------|
| Cpd 1: C19 H31 N5 O4 S; 2.298 | 97.93     | 0.77             | C19 H31 N5 O4 S | 2.298   | 425.2097  | 425.21    |

| Obs. m/z | Obs. RT | Obs. Mass | Tgt Formula     | Tgt Mass | Tgt Mass Error (ppm) | RT Diff.        | Find Cpds Algorithm |
|----------|---------|-----------|-----------------|----------|----------------------|-----------------|---------------------|
| 448.1987 | 2.298   | 425.21    | C19 H31 N5 O4 S | 425.2097 | 0.77                 | Find By Formula |                     |

## Compound Chromatograms

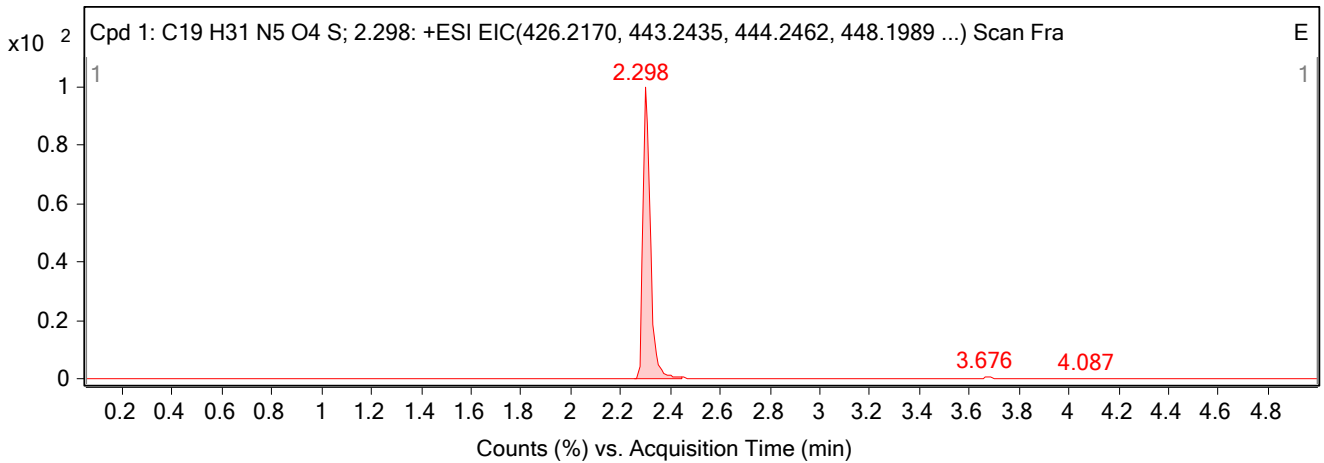

MS Zoomed Spectrum

# Target Compound Screening Report

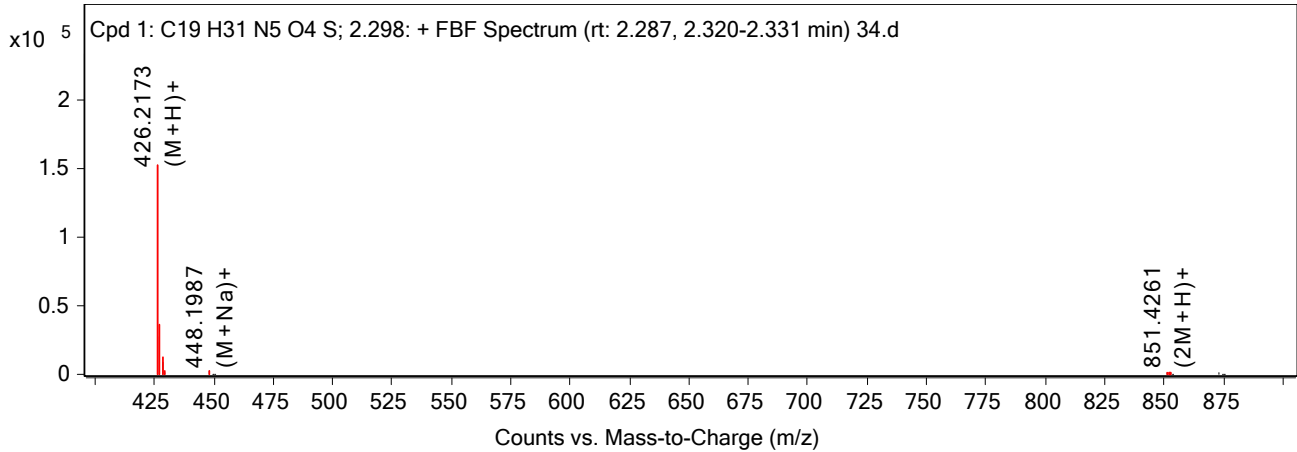

## MS Spectrum Peak List

| Obs. m/z | Charge | Abund     | Ion/Isotope |
|----------|--------|-----------|-------------|
| 426.2173 | 1      | 152303.09 | (M+H)+      |
| 427.22   | 1      | 27819.89  | (M+H)+      |
| 428.2172 | 1      | 8336.16   | (M+H)+      |
| 429.2201 | 1      | 1441.47   | (M+H)+      |
| 448.1987 | 1      | 2499.93   | (M+Na)+     |
| 449.2008 | 1      | 634.84    | (M+Na)+     |
| 851.4261 | 1      | 1635.89   | (2M+H)+     |
| 852.4288 | 1      | 836.76    | (2M+H)+     |
| 873.4081 | 1      | 1021.73   | (2M+Na)+    |
| 874.408  | 1      | 486.63    | (2M+Na)+    |

## MS Zoomed Spectrum

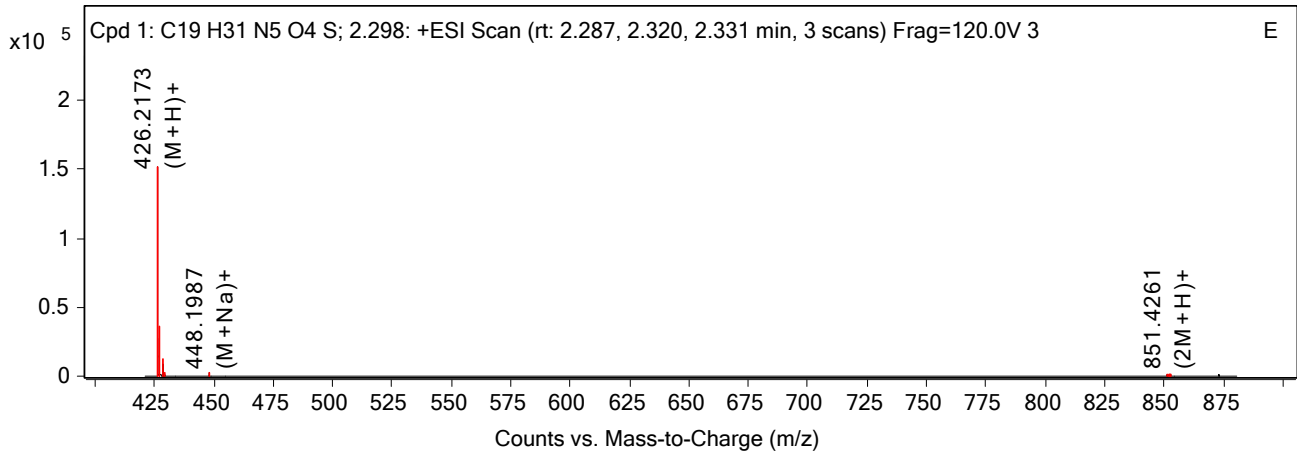

## MS Spectrum Peak List

| Obs. m/z | Charge | Abund     | Ion/Isotope | Tgt Mass Error (ppm) |
|----------|--------|-----------|-------------|----------------------|
| 426.2173 | 1      | 152303.09 | (M+H)+      | -0.88                |
| 427.22   | 1      | 27819.89  | (M+H)+      | -0.7                 |
| 428.2172 | 1      | 8336.16   | (M+H)+      | -0.72                |
| 429.2201 | 1      | 1441.47   | (M+H)+      | -4.52                |
| 448.1987 | 1      | 2499.93   | (M+Na)+     | 0.33                 |
| 449.2008 | 1      | 634.84    | (M+Na)+     | 1.87                 |
| 851.4261 | 1      | 1635.89   | (2M+H)+     | 0.64                 |
| 852.4288 | 1      | 836.76    | (2M+H)+     | 0.73                 |
| 873.4081 | 1      | 1021.73   | (2M+Na)+    | 0.54                 |
| 874.408  | 1      | 486.63    | (2M+Na)+    | 3.8                  |

--- End Of Report ---



# Target Compound Screening Report

|                                 |                                        |                               |                                                     |
|---------------------------------|----------------------------------------|-------------------------------|-----------------------------------------------------|
| <b>Data File</b>                | 48.d                                   | <b>Sample Name</b>            | H1663678                                            |
| <b>Sample Type</b>              | Sample                                 | <b>Position</b>               | P1-F3                                               |
| <b>Instrument Name</b>          | Instrument 1                           | <b>User Name</b>              | Denis V.Bylina                                      |
| <b>Acq Method</b>               | Fast_Gradient_HRMS_pos_Lock_08272019.m | <b>Acquired Time</b>          | 9/23/2021 3:37:34 PM (UTC+03:00)                    |
| <b>IRM Calibration Status</b>   | Success                                | <b>DA Method</b>              | 1.m                                                 |
| <b>Comment</b>                  |                                        | <b>Info.</b>                  | Agilent 6224 TOF LC/MS                              |
| <b>Sample Group</b>             |                                        | <b>Stream Name</b>            | LC 1                                                |
| <b>MFC</b>                      | C18H30N4O4S                            | <b>Acquisition SW Version</b> | 6200 series TOF/6500 series Q-TOF B.08.00 (B8058.0) |
| <b>Acquisition Time (Local)</b> | 9/23/2021 3:37:34 PM (UTC+03:00)       | <b>TOF Firmware Version</b>   | 8.643                                               |
| <b>TOF Driver Version</b>       | 8.00.00                                |                               |                                                     |
| <b>Tune Mass Range Max.</b>     | 1700                                   |                               |                                                     |

## Compound Table

| Label                         | Tgt Score | Mass Error (ppm) | Tgt Formula     | Obs. RT | Ref. Mass | Obs. Mass |
|-------------------------------|-----------|------------------|-----------------|---------|-----------|-----------|
| Cpd 1: C18 H30 N4 O4 S; 2.668 | 95.33     | 0.85             | C18 H30 N4 O4 S | 2.668   | 398.1988  | 398.1991  |

| Obs. m/z | Obs. RT | Obs. Mass | Tgt Formula     | Tgt Mass | Tgt Mass Error (ppm) | RT Diff.        | Find Cpd Algorithm |
|----------|---------|-----------|-----------------|----------|----------------------|-----------------|--------------------|
| 399.2064 | 2.668   | 398.1991  | C18 H30 N4 O4 S | 398.1988 | 0.85                 | Find By Formula |                    |

## Compound Chromatograms

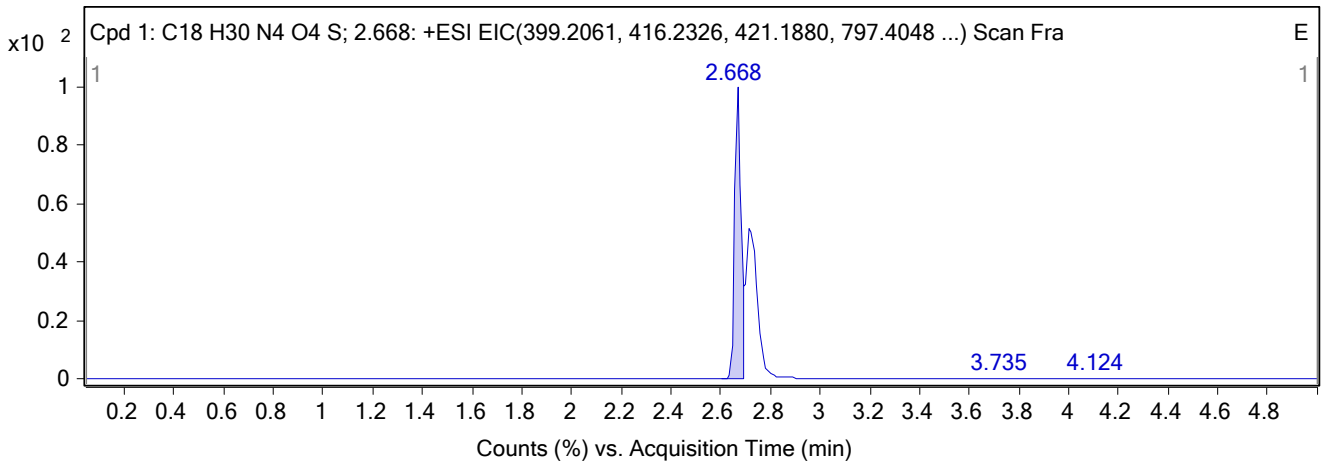

MS Zoomed Spectrum

# Target Compound Screening Report

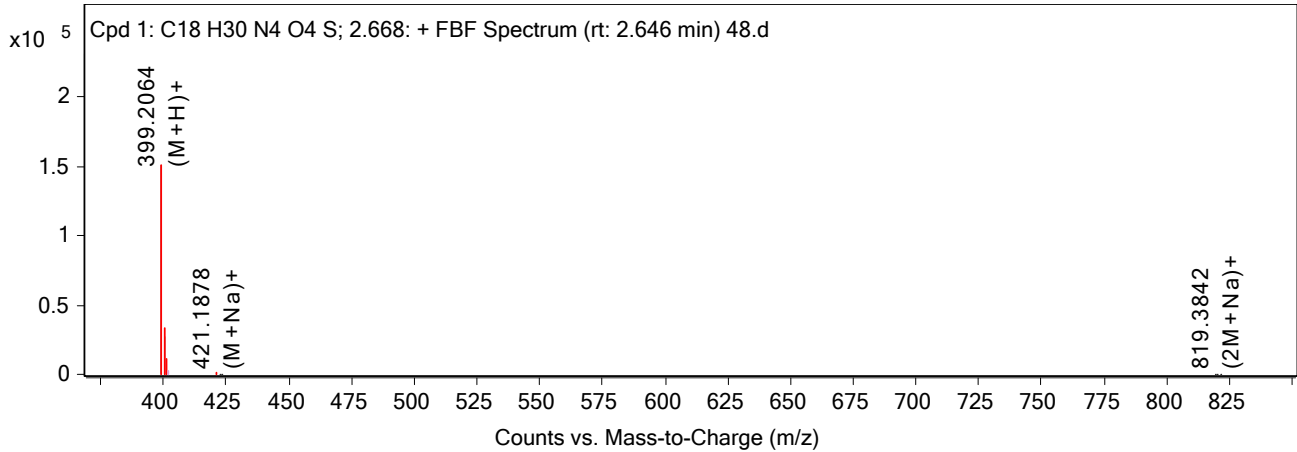

## MS Spectrum Peak List

| Obs. m/z | Charge | Abund     | Ion/Isotope |
|----------|--------|-----------|-------------|
| 399.2064 | 1      | 150441.56 | (M+H)+      |
| 400.2094 | 1      | 26965.12  | (M+H)+      |
| 401.2059 | 1      | 7613.94   | (M+H)+      |
| 421.1878 | 1      | 1081.75   | (M+Na)+     |
| 422.1976 | 1      | 212.13    | (M+Na)+     |
| 423.1797 | 1      | 220.29    | (M+Na)+     |
| 819.3842 | 1      | 574.72    | (2M+Na)+    |
| 820.3819 | 1      | 388       | (2M+Na)+    |
| 821.3729 | 1      | 143.67    | (2M+Na)+    |

## MS Zoomed Spectrum

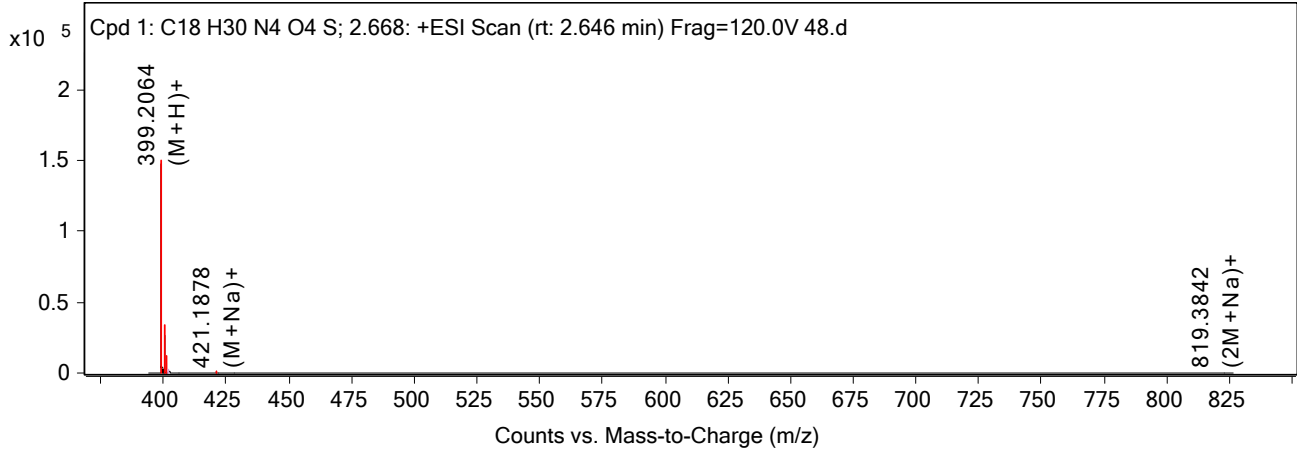

## MS Spectrum Peak List

| Obs. m/z | Charge | Abund     | Ion/Isotope | Tgt Mass Error (ppm) |
|----------|--------|-----------|-------------|----------------------|
| 399.2064 | 1      | 150441.55 | (M+H)+      | -0.94                |
| 400.2094 | 1      | 26965.12  | (M+H)+      | -1.21                |
| 401.2059 | 1      | 7613.94   | (M+H)+      | -0.32                |
| 421.1878 | 1      | 1081.75   | (M+Na)+     | 0.56                 |
| 422.1976 | 1      | 212.13    | (M+Na)+     | -16.04               |
| 423.1797 | 1      | 220.29    | (M+Na)+     | 19.1                 |
| 819.3842 | 1      | 574.72    | (2M+Na)+    | 3.17                 |
| 820.3819 | 1      | 388       | (2M+Na)+    | 9.41                 |
| 821.3729 | 1      | 143.67    | (2M+Na)+    | 18.35                |

--- End Of Report ---

# Target Compound Screening Report

|                                 |                                        |                               |                                                     |
|---------------------------------|----------------------------------------|-------------------------------|-----------------------------------------------------|
| <b>Data File</b>                | 35.d                                   | <b>Sample Name</b>            | H2980916                                            |
| <b>Sample Type</b>              | Sample                                 | <b>Position</b>               | P1-D8                                               |
| <b>Instrument Name</b>          | Instrument 1                           | <b>User Name</b>              | Denis V.Bylina                                      |
| <b>Acq Method</b>               | Fast_Gradient_HRMS_pos_Lock_08272019.m | <b>Acquired Time</b>          | 9/24/2021 1:29:13 PM (UTC+03:00)                    |
| <b>IRM Calibration Status</b>   | Success                                | <b>DA Method</b>              | 1.m                                                 |
| <b>Comment</b>                  |                                        |                               |                                                     |
| <b>Sample Group</b>             |                                        | <b>Info.</b>                  | Agilent 6224 TOF LC/MS                              |
| <b>MFC</b>                      | C24H27N5O2                             | <b>Stream Name</b>            | LC 1                                                |
| <b>Acquisition Time (Local)</b> | 9/24/2021 1:29:13 PM (UTC+03:00)       | <b>Acquisition SW Version</b> | 6200 series TOF/6500 series Q-TOF B.08.00 (B8058.0) |
| <b>TOF Driver Version</b>       | 8.00.00                                | <b>TOF Firmware Version</b>   | 8.643                                               |
| <b>Tune Mass Range Max.</b>     | 1700                                   |                               |                                                     |

## Compound Table

| Label                       | Tgt Score | Mass Error (ppm) | Tgt Formula   | Obs. RT | Ref. Mass | Obs. Mass |
|-----------------------------|-----------|------------------|---------------|---------|-----------|-----------|
| Cpd 1: C24 H27 N5 O2; 3.245 | 95.03     | -1.92            | C24 H27 N5 O2 | 3.245   | 417.2165  | 417.2157  |

| Obs. m/z | Obs. RT | Obs. Mass | Tgt Formula   | Tgt Mass | Tgt Mass Error (ppm) | RT Diff.        | Find Cpds Algorithm |
|----------|---------|-----------|---------------|----------|----------------------|-----------------|---------------------|
| 418.2229 | 3.245   | 417.2157  | C24 H27 N5 O2 | 417.2165 | -1.92                | Find By Formula |                     |

## Compound Chromatograms

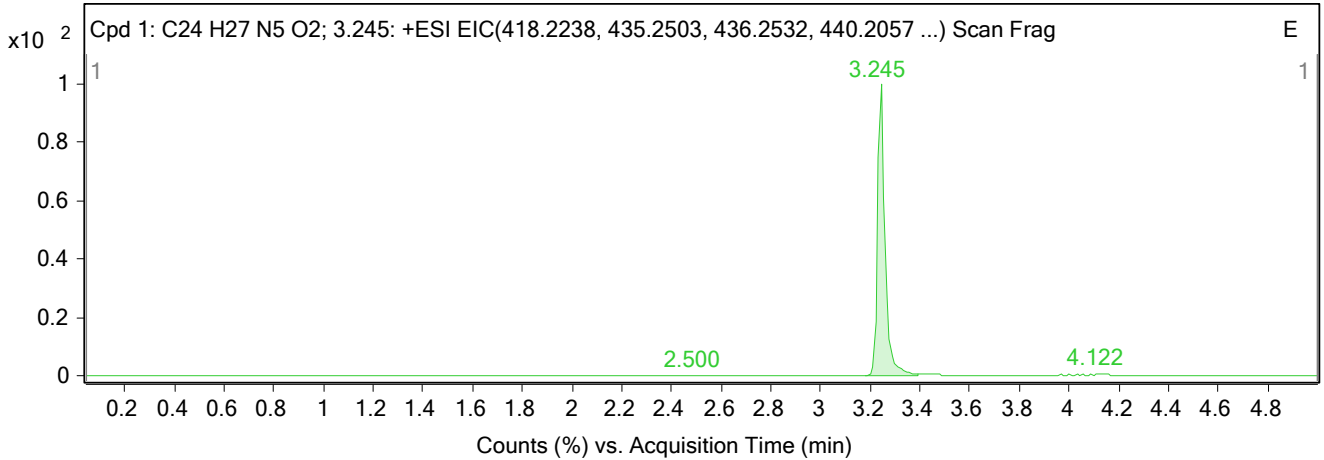

MS Zoomed Spectrum

# Target Compound Screening Report

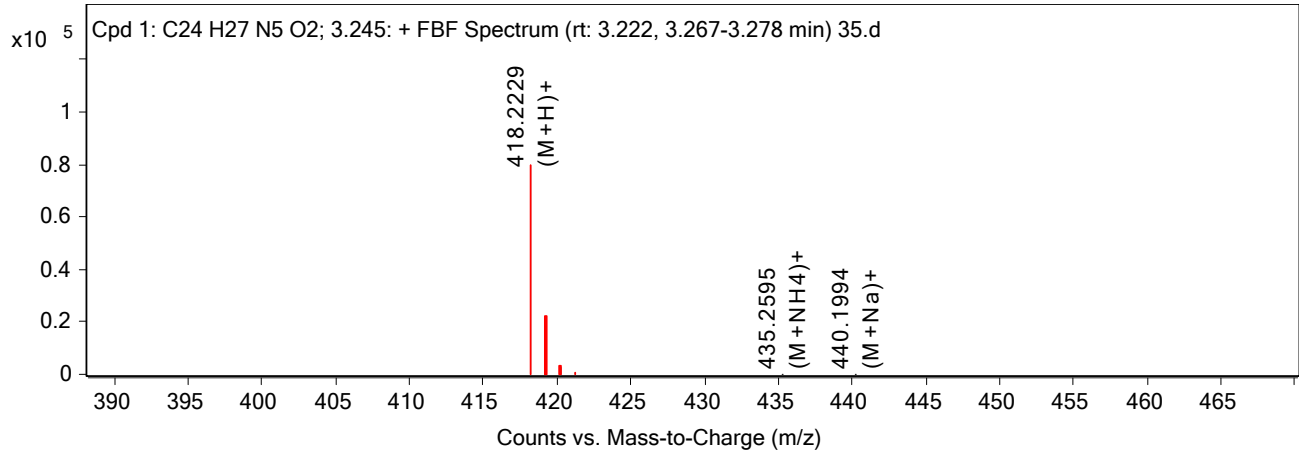

## MS Spectrum Peak List

| Obs. m/z | Charge | Abund    | Ion/Isotope           |
|----------|--------|----------|-----------------------|
| 418.2229 | 1      | 79623.73 | (M+H)+                |
| 419.2261 | 1      | 18527.39 | (M+H)+                |
| 420.2298 | 1      | 2614.28  | (M+H)+                |
| 421.2323 | 1      | 404.32   | (M+H)+                |
| 435.2595 | 1      | 119.75   | (M+NH <sub>4</sub> )+ |
| 440.1994 | 1      | 190.34   | (M+Na)+               |

## MS Zoomed Spectrum

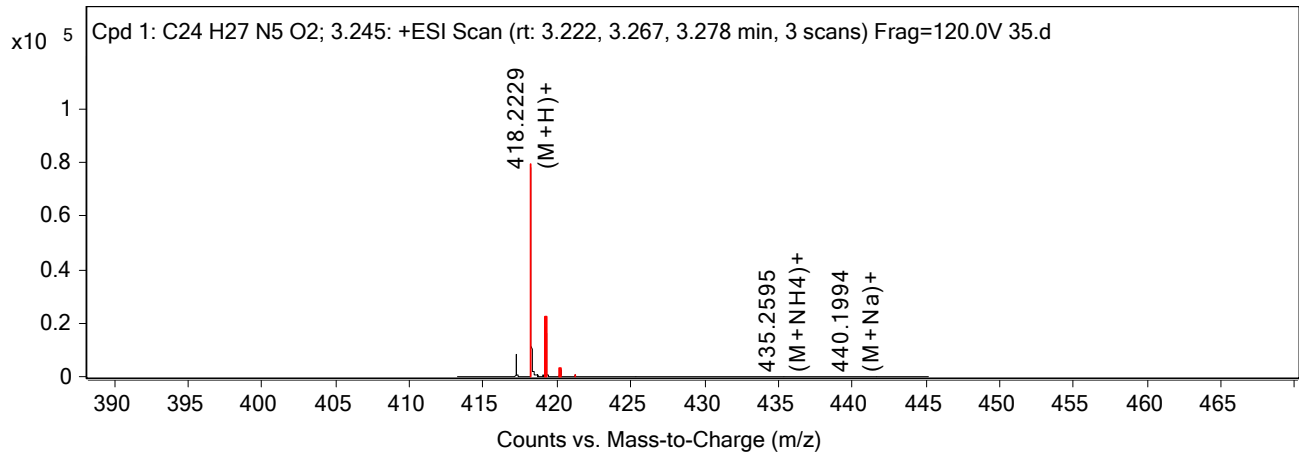

## MS Spectrum Peak List

| Obs. m/z | Charge | Abund    | Ion/Isotope           | Tgt Mass Error (ppm) |
|----------|--------|----------|-----------------------|----------------------|
| 418.2229 | 1      | 79623.72 | (M+H)+                | 2.12                 |
| 418.2229 |        | 79623.72 |                       |                      |
| 419.2261 | 1      | 18527.39 | (M+H)+                | 1.46                 |
| 420.2298 | 1      | 2614.28  | (M+H)+                | -0.6                 |
| 421.2323 | 1      | 404.32   | (M+H)+                | -0.15                |
| 435.2595 | 1      | 119.75   | (M+NH <sub>4</sub> )+ | -21.08               |
| 440.1994 | 1      | 190.34   | (M+Na)+               | 14.25                |

--- End Of Report ---

# Target Compound Screening Report

|                                 |                                        |                               |                                                     |
|---------------------------------|----------------------------------------|-------------------------------|-----------------------------------------------------|
| <b>Data File</b>                | 29-3.d                                 | <b>Sample Name</b>            | H2976996                                            |
| <b>Sample Type</b>              | Sample                                 | <b>Position</b>               | P1-D2                                               |
| <b>Instrument Name</b>          | Instrument 1                           | <b>User Name</b>              | Denis V.Bylina                                      |
| <b>Acq Method</b>               | Fast_Gradient_HRMS_pos_Lock_08272019.m | <b>Acquired Time</b>          | 9/22/2021 6:54:26 PM (UTC+03:00)                    |
| <b>IRM Calibration Status</b>   | Success                                | <b>DA Method</b>              | 1.m                                                 |
| <b>Comment</b>                  |                                        |                               |                                                     |
| <b>Sample Group</b>             |                                        | <b>Info.</b>                  | Agilent 6224 TOF LC/MS                              |
| <b>MFC</b>                      | C25H28N4O2                             | <b>Stream Name</b>            | LC 1                                                |
| <b>Acquisition Time (Local)</b> | 9/22/2021 6:54:26 PM (UTC+03:00)       | <b>Acquisition SW Version</b> | 6200 series TOF/6500 series Q-TOF B.08.00 (B8058.0) |
| <b>TOF Driver Version</b>       | 8.00.00                                | <b>TOF Firmware Version</b>   | 8.643                                               |
| <b>Tune Mass Range Max.</b>     | 1700                                   |                               |                                                     |

## Compound Table

| Label                       | Tgt Score | Mass Error (ppm) | Tgt Formula   | Obs. RT | Ref. Mass | Obs. Mass |
|-----------------------------|-----------|------------------|---------------|---------|-----------|-----------|
| Cpd 1: C25 H28 N4 O2; 3.246 | 94.5      | 0.42             | C25 H28 N4 O2 | 3.246   | 416.2212  | 416.2214  |

| Obs. m/z | Obs. RT | Obs. Mass | Tgt Formula   | Tgt Mass | Tgt Mass Error (ppm) | RT Diff.        | Find Cpds Algorithm |
|----------|---------|-----------|---------------|----------|----------------------|-----------------|---------------------|
| 417.2288 | 3.246   | 416.2214  | C25 H28 N4 O2 | 416.2212 | 0.42                 | Find By Formula |                     |

## Compound Chromatograms

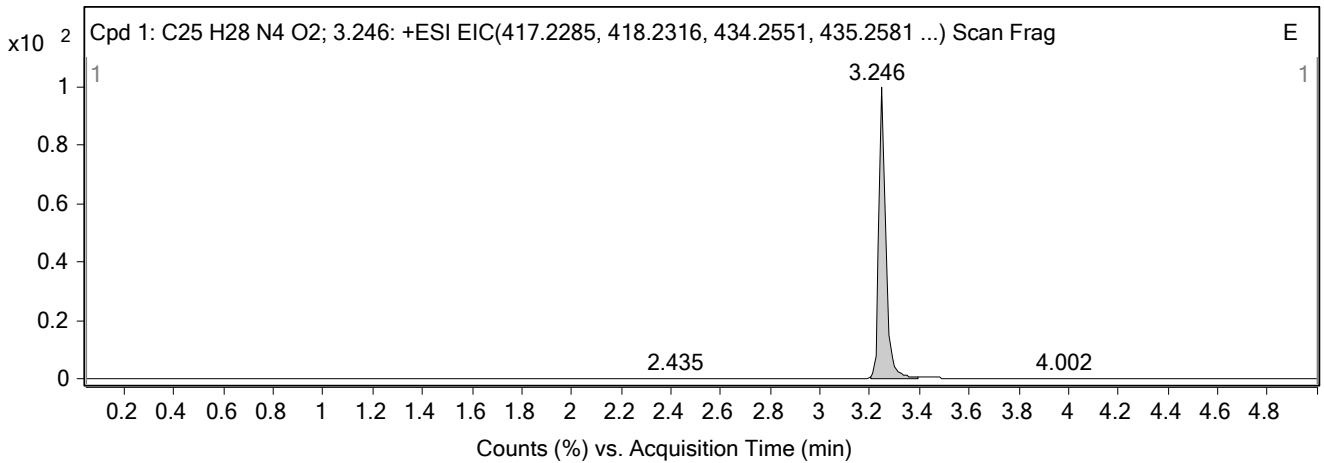

MS Zoomed Spectrum

# Target Compound Screening Report

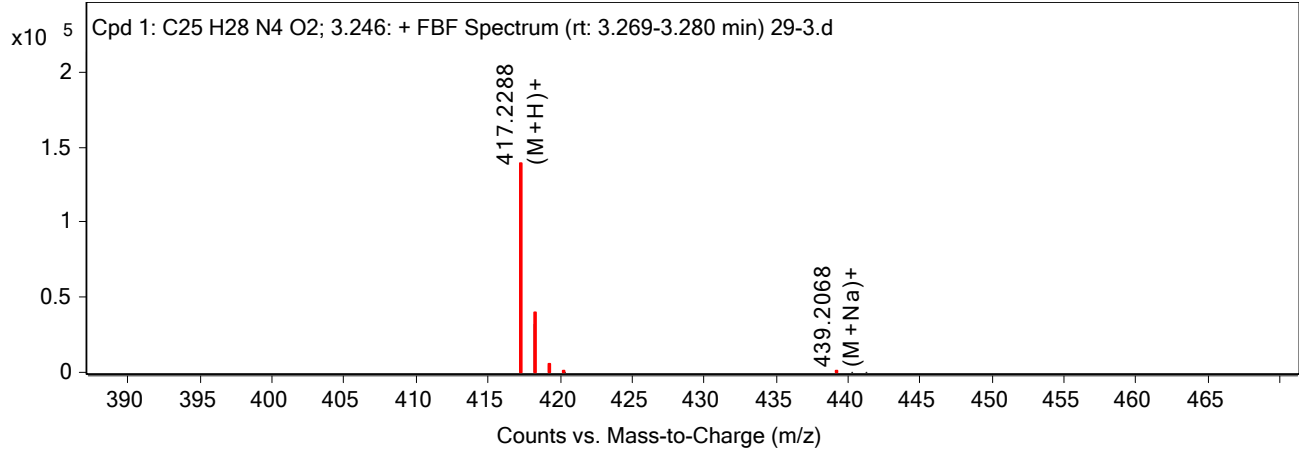

## MS Spectrum Peak List

| Obs. m/z | Charge | Abund     | Ion/Isotope |
|----------|--------|-----------|-------------|
| 417.2288 | 1      | 139169.81 | (M+H)+      |
| 418.2316 | 1      | 32177.25  | (M+H)+      |
| 419.234  | 1      | 4238.26   | (M+H)+      |
| 420.2404 | 1      | 446.89    | (M+H)+      |
| 439.2068 | 1      | 952.57    | (M+Na)+     |
| 440.2081 | 1      | 293.52    | (M+Na)+     |
| 441.2135 | 1      | 91        | (M+Na)+     |

## MS Zoomed Spectrum

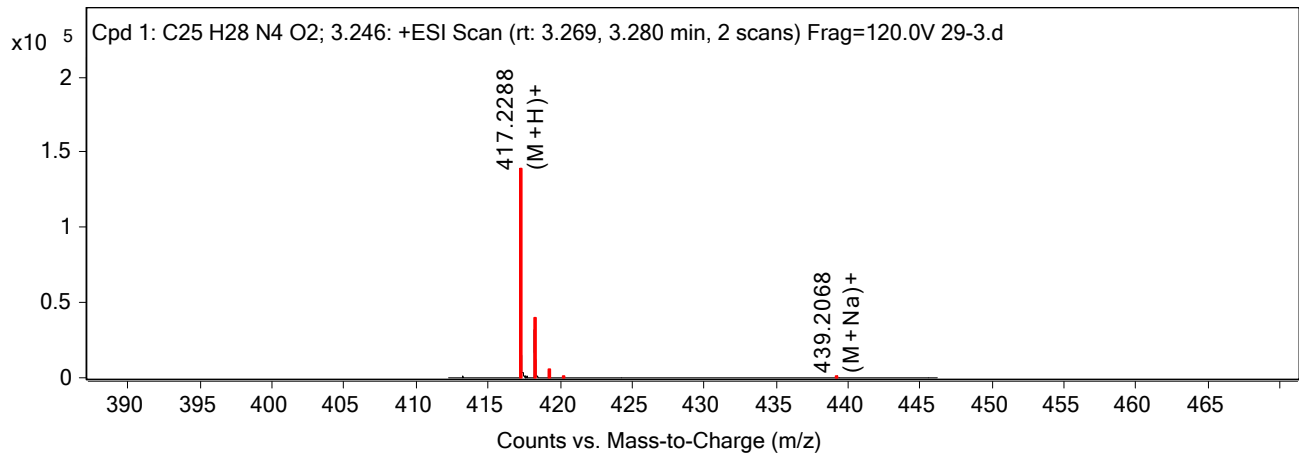

## MS Spectrum Peak List

| Obs. m/z | Charge | Abund     | Ion/Isotope | Tgt Mass Error (ppm) |
|----------|--------|-----------|-------------|----------------------|
| 417.2288 | 1      | 139169.81 | (M+H)+      | -0.6                 |
| 418.2316 | 1      | 32177.25  | (M+H)+      | -0.14                |
| 419.234  | 1      | 4238.26   | (M+H)+      | 1.13                 |
| 420.2404 | 1      | 446.89    | (M+H)+      | -7.64                |
| 439.2068 | 1      | 952.57    | (M+Na)+     | 8.22                 |
| 440.2081 | 1      | 293.52    | (M+Na)+     | 12.27                |
| 441.2135 | 1      | 91        | (M+Na)+     | 6.54                 |

--- End Of Report ---

# Target Compound Screening Report

|                                 |                                        |                               |                                                     |
|---------------------------------|----------------------------------------|-------------------------------|-----------------------------------------------------|
| <b>Data File</b>                | 37.d                                   | <b>Sample Name</b>            | H2978811                                            |
| <b>Sample Type</b>              | Sample                                 | <b>Position</b>               | P1-E1                                               |
| <b>Instrument Name</b>          | Instrument 1                           | <b>User Name</b>              | Denis V.Bylina                                      |
| <b>Acq Method</b>               | Fast_Gradient_HRMS_pos_Lock_08272019.m | <b>Acquired Time</b>          | 9/22/2021 5:07:55 PM (UTC+03:00)                    |
| <b>IRM Calibration Status</b>   | Success                                | <b>DA Method</b>              | 1.m                                                 |
| <b>Comment</b>                  |                                        |                               |                                                     |
| <b>Sample Group</b>             |                                        | <b>Info.</b>                  | Agilent 6224 TOF LC/MS                              |
| <b>MFC</b>                      | C26H30N4O2                             | <b>Stream Name</b>            | LC 1                                                |
| <b>Acquisition Time (Local)</b> | 9/22/2021 5:07:55 PM (UTC+03:00)       | <b>Acquisition SW Version</b> | 6200 series TOF/6500 series Q-TOF B.08.00 (B8058.0) |
| <b>TOF Driver Version</b>       | 8.00.00                                | <b>TOF Firmware Version</b>   | 8.643                                               |
| <b>Tune Mass Range Max.</b>     | 1700                                   |                               |                                                     |

## Compound Table

| Label                       | Tgt Score | Mass Error (ppm) | Tgt Formula   | Obs. RT | Ref. Mass | Obs. Mass |
|-----------------------------|-----------|------------------|---------------|---------|-----------|-----------|
| Cpd 1: C26 H30 N4 O2; 3.308 | 97.06     | -0.5             | C26 H30 N4 O2 | 3.308   | 430.2369  | 430.2367  |

| Obs. m/z | Obs. RT | Obs. Mass | Tgt Formula   | Tgt Mass | Tgt Mass Error (ppm) | RT Diff.        | Find Cpds Algorithm |
|----------|---------|-----------|---------------|----------|----------------------|-----------------|---------------------|
| 431.2439 | 3.308   | 430.2367  | C26 H30 N4 O2 | 430.2369 | -0.5                 | Find By Formula |                     |

## Compound Chromatograms

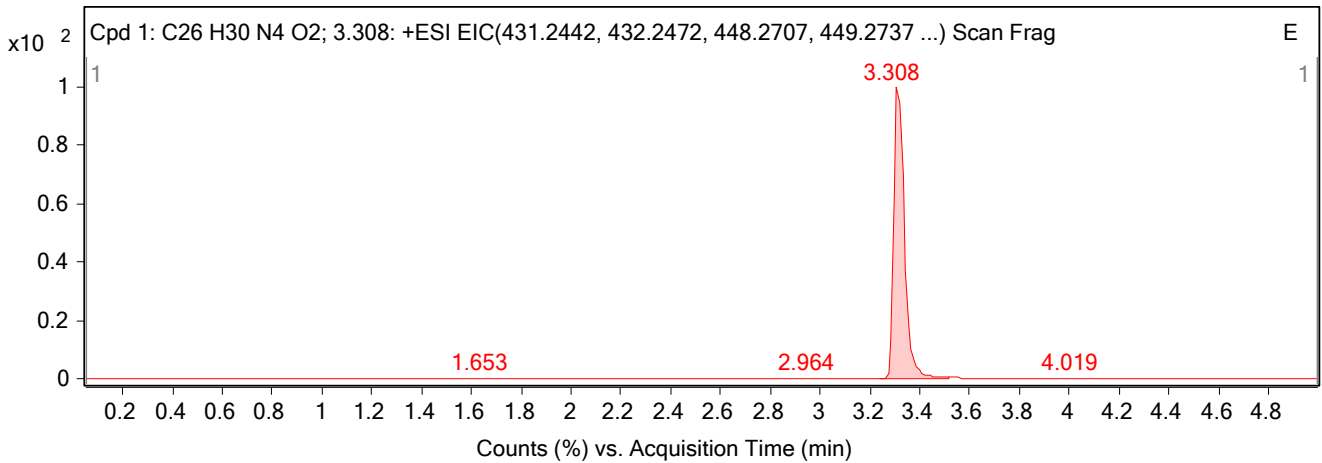

MS Zoomed Spectrum

# Target Compound Screening Report

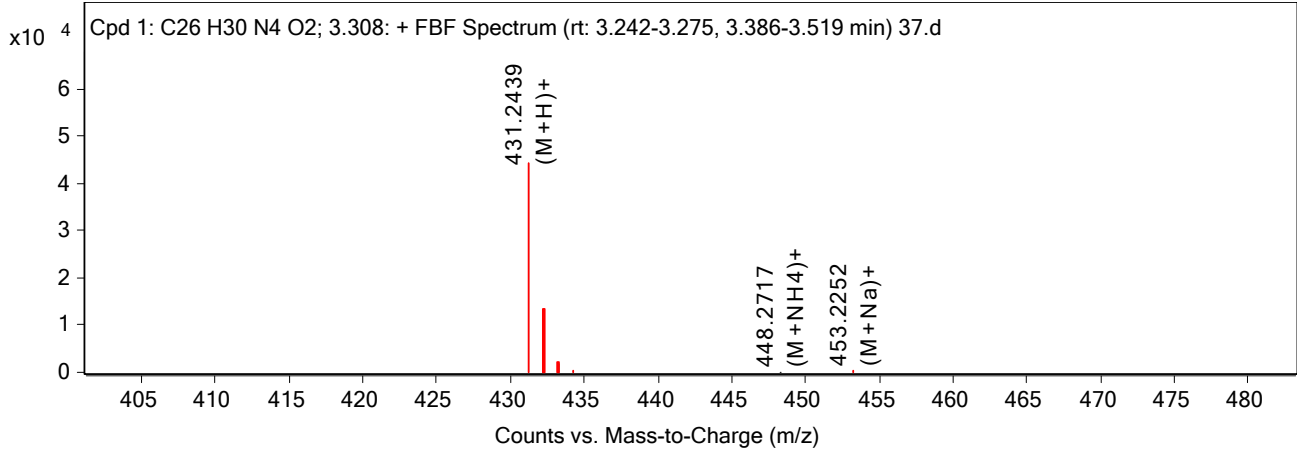

## MS Spectrum Peak List

| Obs. m/z | Charge | Abund    | Ion/Isotope           |
|----------|--------|----------|-----------------------|
| 431.2439 | 1      | 44286.14 | (M+H)+                |
| 432.2469 | 1      | 11408.54 | (M+H)+                |
| 433.25   | 1      | 1690.88  | (M+H)+                |
| 434.2538 | 1      | 224.21   | (M+H)+                |
| 448.2717 | 1      | 130.71   | (M+NH <sub>4</sub> )+ |
| 453.2252 | 1      | 378.63   | (M+Na)+               |

## MS Zoomed Spectrum

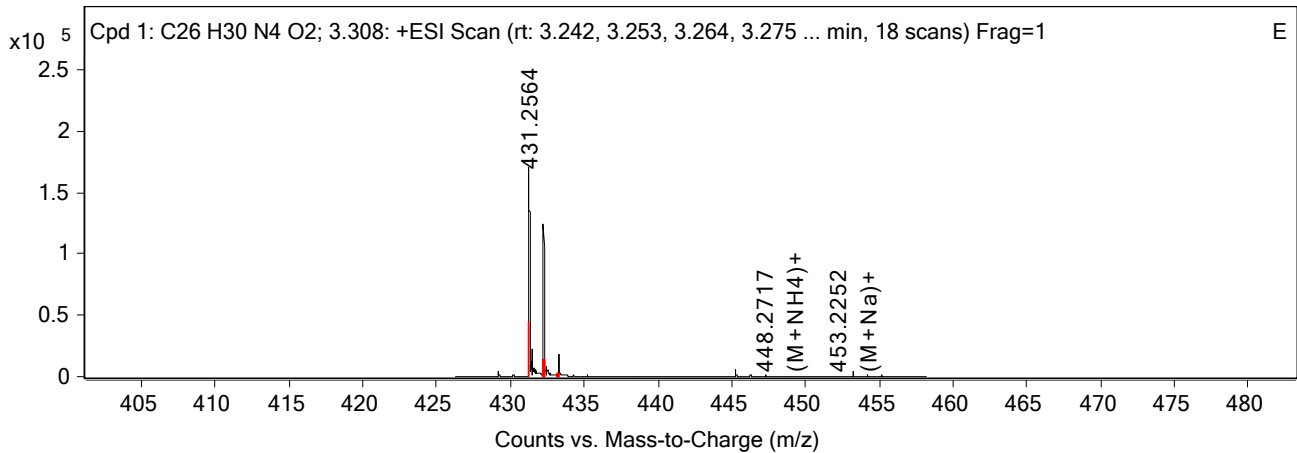

## MS Spectrum Peak List

| Obs. m/z | Charge | Abund     | Ion/Isotope           | Tgt Mass Error (ppm) |
|----------|--------|-----------|-----------------------|----------------------|
| 431.2439 | 1      | 44286.14  | (M+H)+                | 0.47                 |
| 431.2564 |        | 170359.95 |                       |                      |
| 432.2469 | 1      | 11408.54  | (M+H)+                | 0.67                 |
| 433.25   | 1      | 1690.88   | (M+H)+                | 0.35                 |
| 434.2538 | 1      | 224.21    | (M+H)+                | -1.98                |
| 448.2717 | 1      | 130.71    | (M+NH <sub>4</sub> )+ | -2.27                |
| 453.2252 | 1      | 378.63    | (M+Na)+               | 1.89                 |

--- End Of Report ---

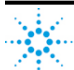



# Target Compound Screening Report

|                                 |                                        |                               |                                                     |
|---------------------------------|----------------------------------------|-------------------------------|-----------------------------------------------------|
| <b>Data File</b>                | 27.d                                   | <b>Sample Name</b>            | H2976999                                            |
| <b>Sample Type</b>              | Sample                                 | <b>Position</b>               | P1-C9                                               |
| <b>Instrument Name</b>          | Instrument 1                           | <b>User Name</b>              | Denis V.Bylina                                      |
| <b>Acq Method</b>               | Fast_Gradient_HRMS_pos_Lock_08272019.m | <b>Acquired Time</b>          | 9/22/2021 4:12:23 PM (UTC+03:00)                    |
| <b>IRM Calibration Status</b>   | Success                                | <b>DA Method</b>              | 1.m                                                 |
| <b>Comment</b>                  |                                        |                               |                                                     |
| <b>Sample Group</b>             |                                        | <b>Info.</b>                  | Agilent 6224 TOF LC/MS                              |
| <b>MFC</b>                      | C24H24F2N4O2                           | <b>Stream Name</b>            | LC 1                                                |
| <b>Acquisition Time (Local)</b> | 9/22/2021 4:12:23 PM (UTC+03:00)       | <b>Acquisition SW Version</b> | 6200 series TOF/6500 series Q-TOF B.08.00 (B8058.0) |
| <b>TOF Driver Version</b>       | 8.00.00                                | <b>TOF Firmware Version</b>   | 8.643                                               |
| <b>Tune Mass Range Max.</b>     | 1700                                   |                               |                                                     |

## Compound Table

| Label                          | Tgt Score | Mass Error (ppm) | Tgt Formula      | Obs. RT | Ref. Mass | Obs. Mass |
|--------------------------------|-----------|------------------|------------------|---------|-----------|-----------|
| Cpd 1: C24 H24 F2 N4 O2; 3.233 | 96.58     | -0.23            | C24 H24 F2 N4 O2 | 3.233   | 438.1867  | 438.1866  |

| Obs. m/z | Obs. RT | Obs. Mass | Tgt Formula      | Tgt Mass | Tgt Mass Error (ppm) | RT Diff.        | Find Cpds Algorithm |
|----------|---------|-----------|------------------|----------|----------------------|-----------------|---------------------|
| 439.1939 | 3.233   | 438.1866  | C24 H24 F2 N4 O2 | 438.1867 | -0.23                | Find By Formula |                     |

## Compound Chromatograms

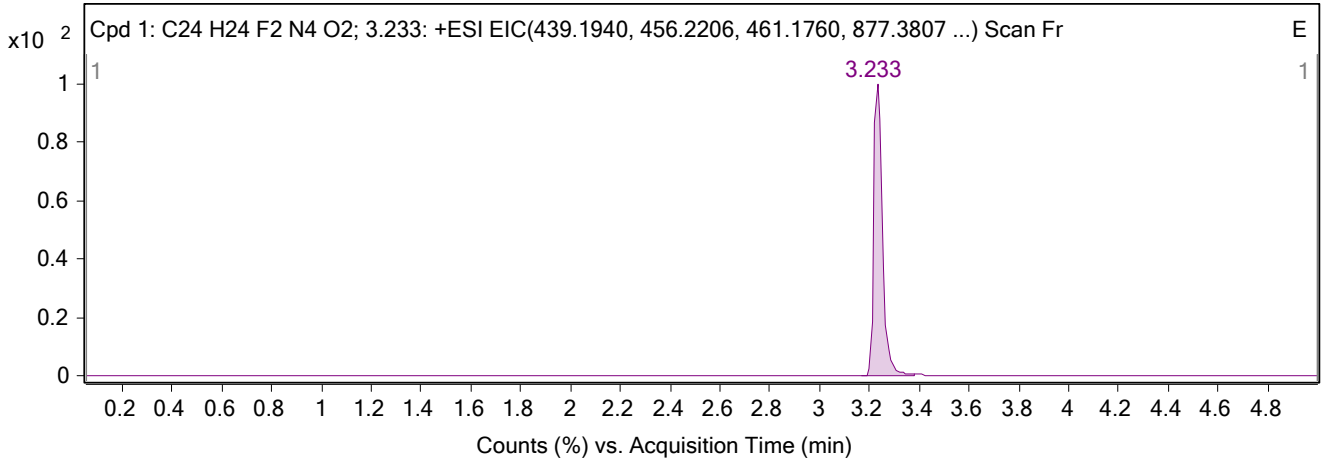

MS Zoomed Spectrum

# Target Compound Screening Report

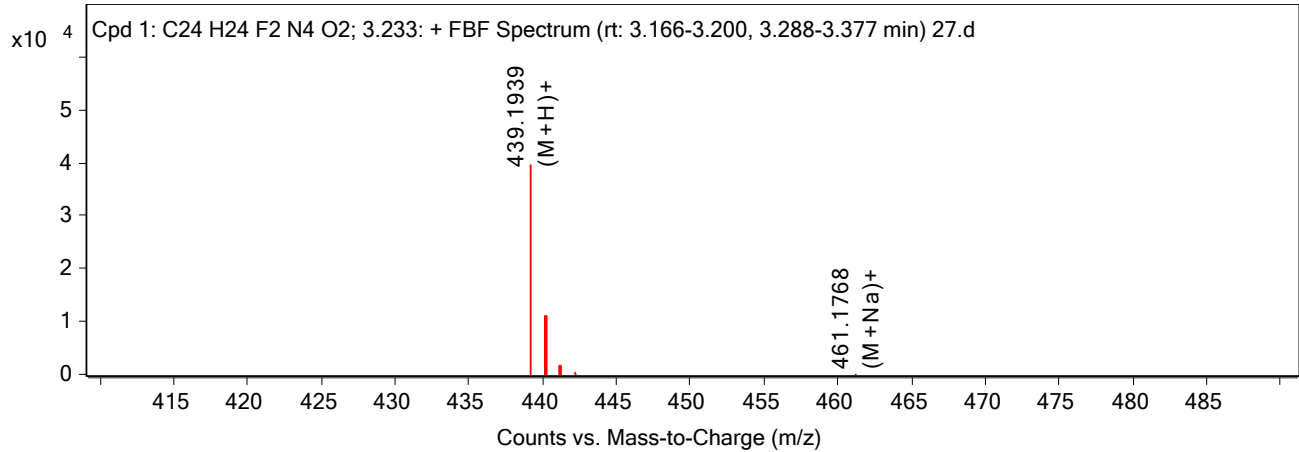

## MS Spectrum Peak List

| Obs. m/z | Charge | Abund    | Ion/Isotope |
|----------|--------|----------|-------------|
| 439.1939 | 1      | 39488.62 | (M+H)+      |
| 440.1969 | 1      | 9223.66  | (M+H)+      |
| 441.2007 | 1      | 1331.97  | (M+H)+      |
| 442.201  | 1      | 180.49   | (M+H)+      |
| 461.1768 | 1      | 90.23    | (M+Na)+     |

## MS Zoomed Spectrum

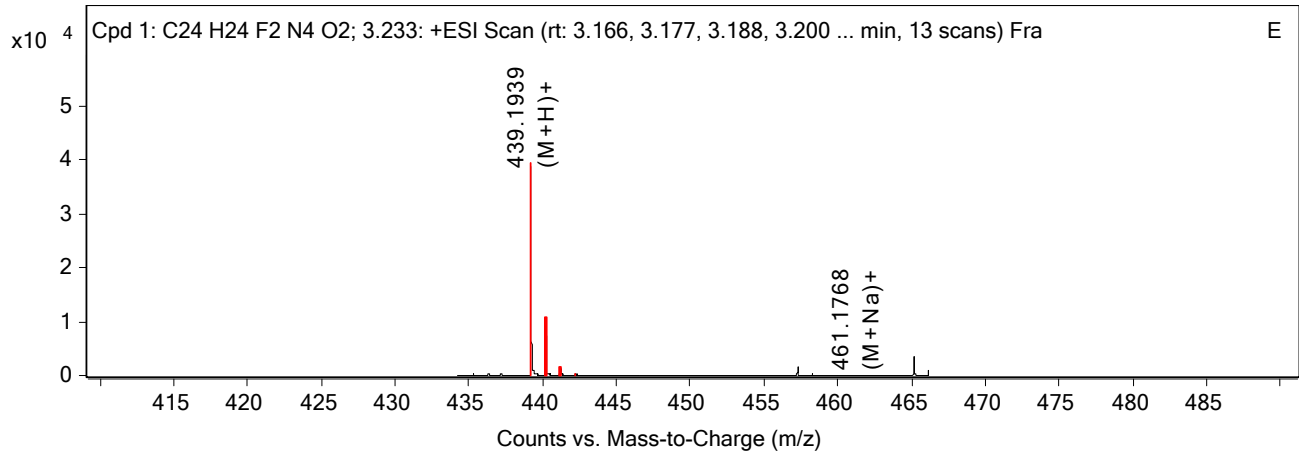

## MS Spectrum Peak List

| Obs. m/z | Charge | Abund    | Ion/Isotope | Tgt Mass Error (ppm) |
|----------|--------|----------|-------------|----------------------|
| 439.1939 | 1      | 39488.62 | (M+H)+      | 0.23                 |
| 440.1969 | 1      | 9223.66  | (M+H)+      | 0.45                 |
| 441.2007 | 1      | 1331.97  | (M+H)+      | -1.85                |
| 442.201  | 1      | 180.49   | (M+H)+      | 3.77                 |
| 461.1768 | 1      | 90.23    | (M+Na)+     | -1.77                |

--- End Of Report ---

# Target Compound Screening Report

|                                 |                                        |                               |                                                     |
|---------------------------------|----------------------------------------|-------------------------------|-----------------------------------------------------|
| <b>Data File</b>                | 15.d                                   | <b>Sample Name</b>            | H2982407                                            |
| <b>Sample Type</b>              | Sample                                 | <b>Position</b>               | P1-B6                                               |
| <b>Instrument Name</b>          | Instrument 1                           | <b>User Name</b>              | Denis V.Bylina                                      |
| <b>Acq Method</b>               | Fast_Gradient_HRMS_pos_Lock_08272019.m | <b>Acquired Time</b>          | 9/24/2021 11:42:15 AM (UTC+03:00)                   |
| <b>IRM Calibration Status</b>   | Success                                | <b>DA Method</b>              | 1.m                                                 |
| <b>Comment</b>                  |                                        |                               |                                                     |
| <b>Sample Group</b>             |                                        | <b>Info.</b>                  | Agilent 6224 TOF LC/MS                              |
| <b>MFC</b>                      | C25H27FN4O2                            | <b>Stream Name</b>            | LC 1                                                |
| <b>Acquisition Time (Local)</b> | 9/24/2021 11:42:15 AM (UTC+03:00)      | <b>Acquisition SW Version</b> | 6200 series TOF/6500 series Q-TOF B.08.00 (B8058.0) |
| <b>TOF Driver Version</b>       | 8.00.00                                | <b>TOF Firmware Version</b>   | 8.643                                               |
| <b>Tune Mass Range Max.</b>     | 1700                                   |                               |                                                     |

## Compound Table

| Label                         | Tgt Score | Mass Error (ppm) | Tgt Formula     | Obs. RT | Ref. Mass | Obs. Mass |
|-------------------------------|-----------|------------------|-----------------|---------|-----------|-----------|
| Cpd 1: C25 H27 F N4 O2; 3.273 | 94.41     | -2.01            | C25 H27 F N4 O2 | 3.273   | 434.2118  | 434.2109  |

| Obs. m/z | Obs. RT | Obs. Mass | Tgt Formula     | Tgt Mass | Tgt Mass Error (ppm) | RT Diff.        | Find Cpds Algorithm |
|----------|---------|-----------|-----------------|----------|----------------------|-----------------|---------------------|
| 435.2182 | 3.273   | 434.2109  | C25 H27 F N4 O2 | 434.2118 | -2.01                | Find By Formula |                     |

## Compound Chromatograms

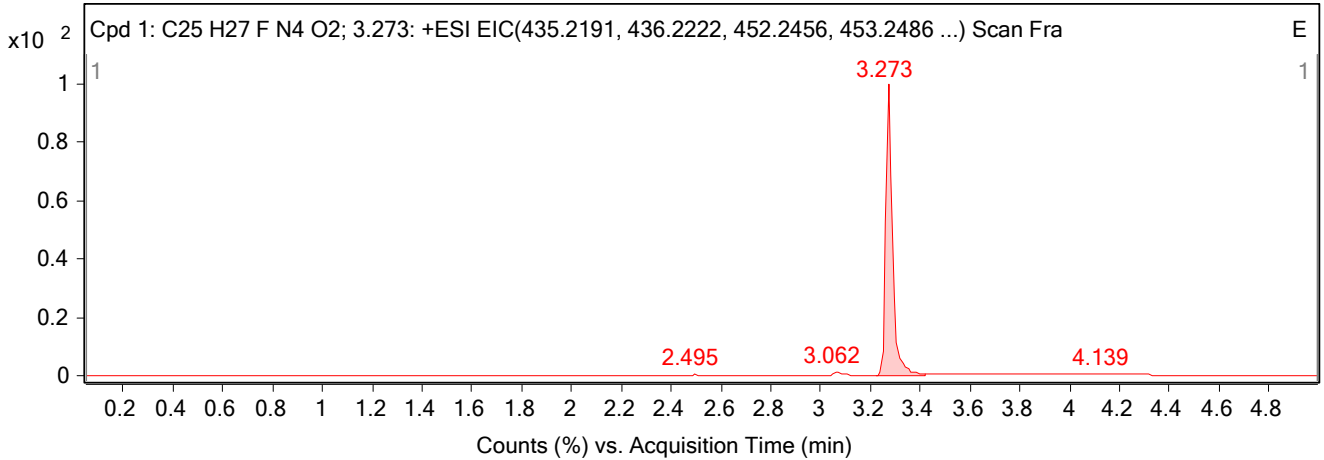

MS Zoomed Spectrum

# Target Compound Screening Report

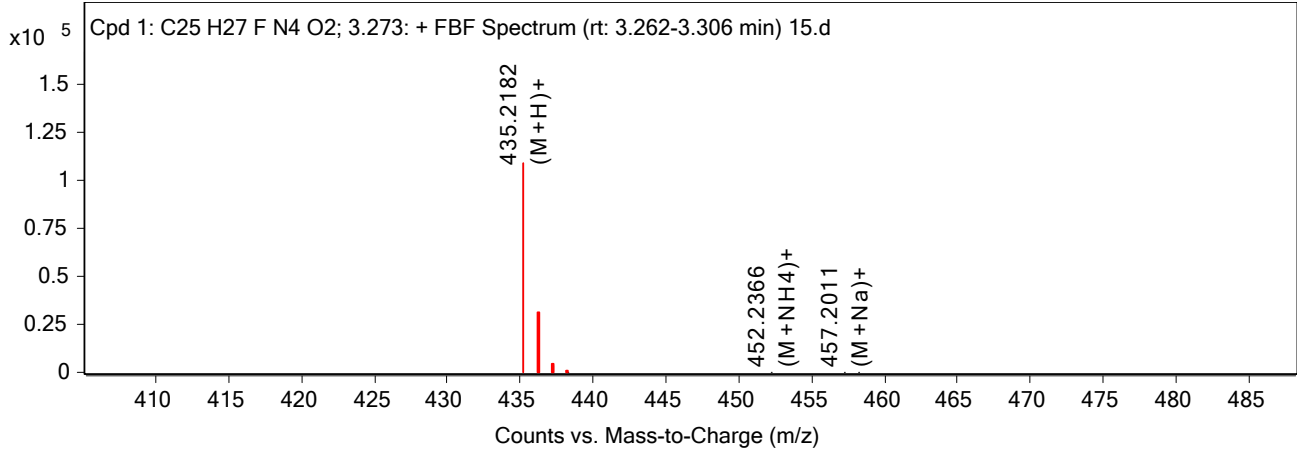

## MS Spectrum Peak List

| Obs. m/z | Charge | Abund     | Ion/Isotope           |
|----------|--------|-----------|-----------------------|
| 435.2182 | 1      | 108911.49 | (M+H)+                |
| 436.2214 | 1      | 25626.43  | (M+H)+                |
| 437.2231 | 1      | 3456.38   | (M+H)+                |
| 438.2285 | 1      | 402.54    | (M+H)+                |
| 452.2366 | 1      | 152.4     | (M+NH <sub>4</sub> )+ |
| 457.2011 | 1      | 279.1     | (M+Na)+               |
| 458.1971 | 1      | 102.73    | (M+Na)+               |

## MS Zoomed Spectrum

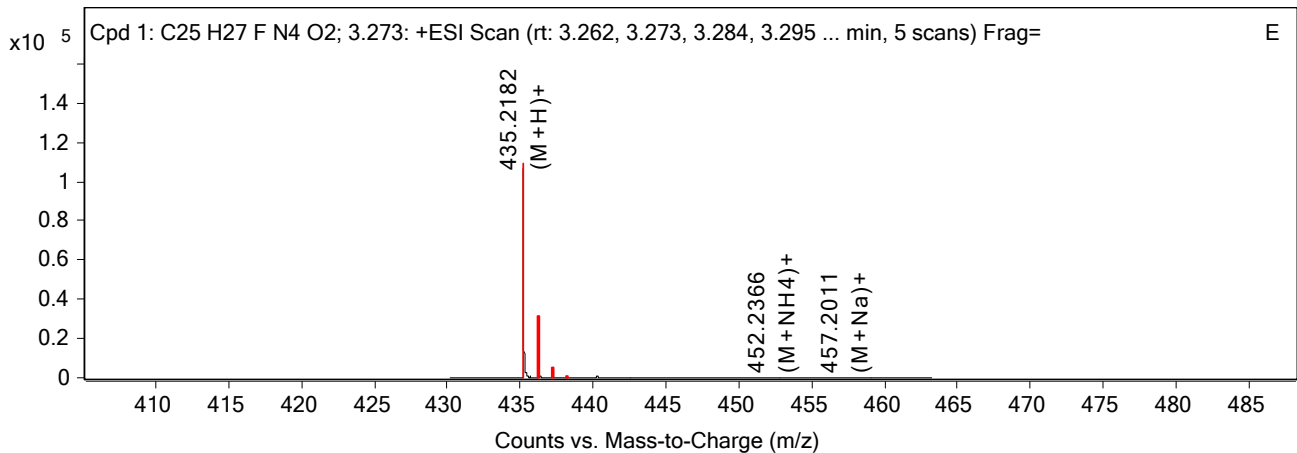

## MS Spectrum Peak List

| Obs. m/z | Charge | Abund     | Ion/Isotope           | Tgt Mass Error (ppm) |
|----------|--------|-----------|-----------------------|----------------------|
| 435.2182 | 1      | 108911.49 | (M+H)+                | 1.95                 |
| 435.2182 | 1      | 108911.49 | (M+H)+                |                      |
| 436.2214 | 1      | 25626.43  | (M+H)+                | 1.81                 |
| 437.2231 | 1      | 3456.38   | (M+H)+                | 4.36                 |
| 438.2285 | 1      | 402.54    | (M+H)+                | -1.51                |
| 452.2366 | 1      | 152.4     | (M+NH <sub>4</sub> )+ | 20                   |
| 457.2011 | 1      | 279.1     | (M+Na)+               | -0.15                |
| 458.1971 | 1      | 102.73    | (M+Na)+               | 15.34                |

--- End Of Report ---

# Target Compound Screening Report

|                                 |                                        |                               |                                                     |
|---------------------------------|----------------------------------------|-------------------------------|-----------------------------------------------------|
| <b>Data File</b>                | 51.d                                   | <b>Sample Name</b>            | H2978812                                            |
| <b>Sample Type</b>              | Sample                                 | <b>Position</b>               | P1-F6                                               |
| <b>Instrument Name</b>          | Instrument 1                           | <b>User Name</b>              | Denis V.Bylina                                      |
| <b>Acq Method</b>               | Fast_Gradient_HRMS_pos_Lock_08272019.m | <b>Acquired Time</b>          | 9/22/2021 6:25:41 PM (UTC+03:00)                    |
| <b>IRM Calibration Status</b>   | Success                                | <b>DA Method</b>              | 1.m                                                 |
| <b>Comment</b>                  |                                        |                               |                                                     |
| <b>Sample Group</b>             |                                        | <b>Info.</b>                  | Agilent 6224 TOF LC/MS                              |
| <b>MFC</b>                      | C26H30N4O3                             | <b>Stream Name</b>            | LC 1                                                |
| <b>Acquisition Time (Local)</b> | 9/22/2021 6:25:41 PM (UTC+03:00)       | <b>Acquisition SW Version</b> | 6200 series TOF/6500 series Q-TOF B.08.00 (B8058.0) |
| <b>TOF Driver Version</b>       | 8.00.00                                | <b>TOF Firmware Version</b>   | 8.643                                               |
| <b>Tune Mass Range Max.</b>     | 1700                                   |                               |                                                     |

## Compound Table

| Label                       | Tgt Score | Mass Error (ppm) | Tgt Formula   | Obs. RT | Ref. Mass | Obs. Mass |
|-----------------------------|-----------|------------------|---------------|---------|-----------|-----------|
| Cpd 1: C26 H30 N4 O3; 3.232 | 95.15     | -0.89            | C26 H30 N4 O3 | 3.232   | 446.2318  | 446.2314  |

| Obs. m/z | Obs. RT | Obs. Mass | Tgt Formula   | Tgt Mass | Tgt Mass Error (ppm) | RT Diff.        | Find Cpds Algorithm |
|----------|---------|-----------|---------------|----------|----------------------|-----------------|---------------------|
| 447.2391 | 3.232   | 446.2314  | C26 H30 N4 O3 | 446.2318 | -0.89                | Find By Formula |                     |

## Compound Chromatograms

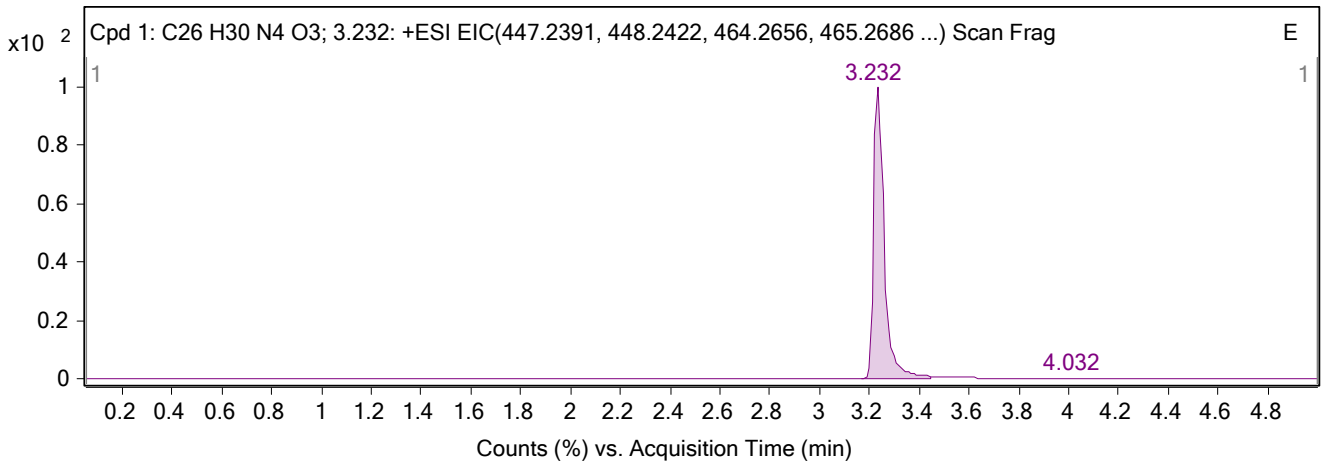

MS Zoomed Spectrum

# Target Compound Screening Report

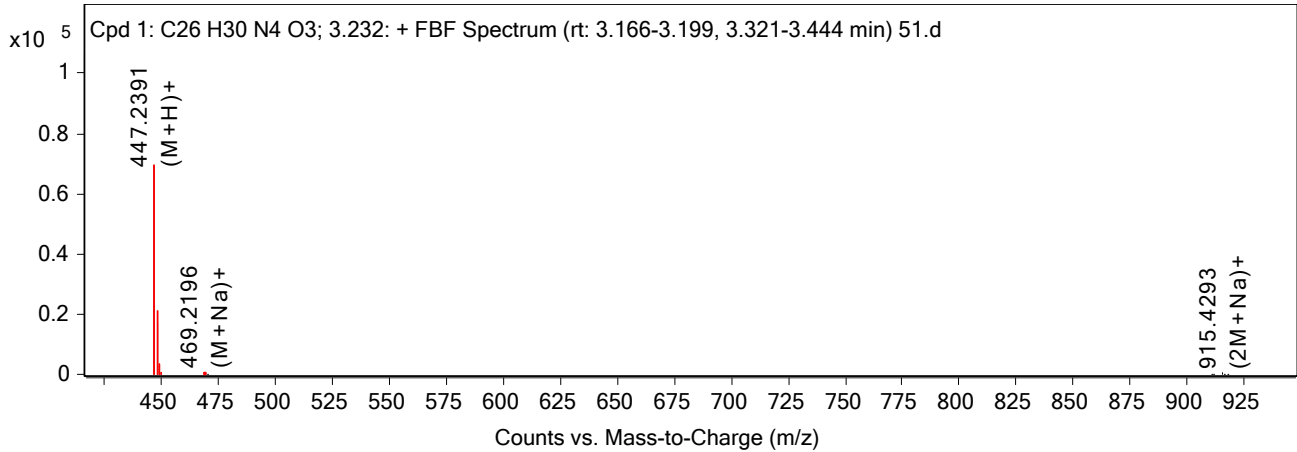

## MS Spectrum Peak List

| Obs. m/z | Charge | Abund    | Ion/Isotope            |
|----------|--------|----------|------------------------|
| 447.2391 | 1      | 69393.39 | (M+H)+                 |
| 448.2418 | 1      | 17151.14 | (M+H)+                 |
| 449.243  | 1      | 3168.75  | (M+H)+                 |
| 450.2426 | 1      | 493.79   | (M+H)+                 |
| 469.2196 | 1      | 639.33   | (M+Na)+                |
| 470.2214 | 1      | 236.99   | (M+Na)+                |
| 910.4736 | 1      | 84.03    | (2M+NH <sub>4</sub> )+ |
| 915.4293 | 1      | 428.8    | (2M+Na)+               |
| 916.4323 | 1      | 222.98   | (2M+Na)+               |
| 917.4314 | 1      | 113.23   | (2M+Na)+               |

## MS Zoomed Spectrum

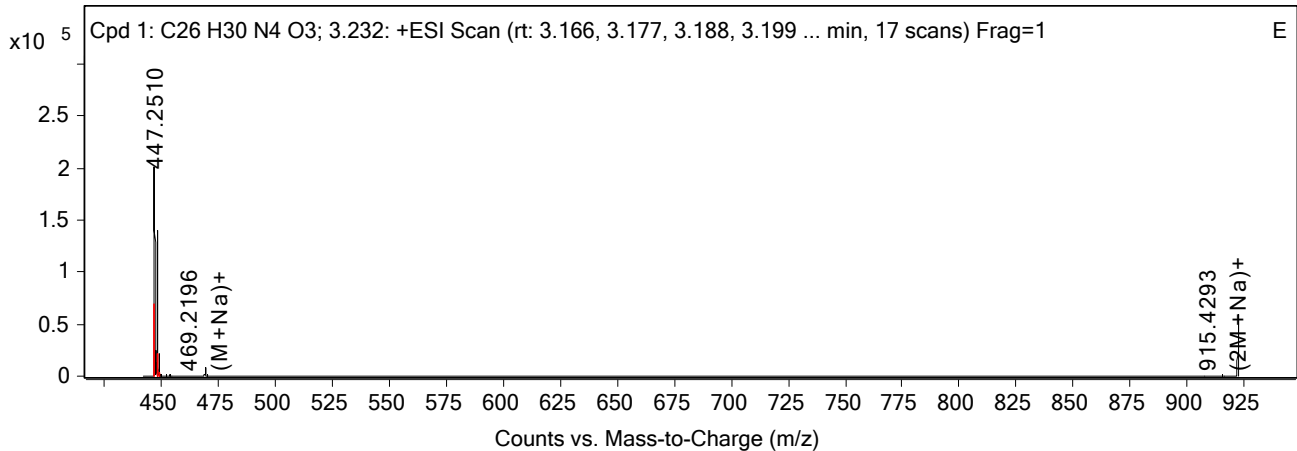

## MS Spectrum Peak List

| Obs. m/z | Charge | Abund    | Ion/Isotope            | Tgt Mass Error (ppm) |
|----------|--------|----------|------------------------|----------------------|
| 447.2391 | 1      | 69393.39 | (M+H)+                 | -0.03                |
| 448.2418 | 1      | 17151.14 | (M+H)+                 | 0.75                 |
| 449.243  | 1      | 3168.75  | (M+H)+                 | 4.34                 |
| 450.2426 | 1      | 493.79   | (M+H)+                 | 11.35                |
| 469.2196 | 1      | 639.33   | (M+Na)+                | 2.93                 |
| 470.2214 | 1      | 236.99   | (M+Na)+                | 5.66                 |
| 910.4736 | 1      | 84.03    | (2M+NH <sub>4</sub> )+ | 26.2                 |
| 915.4293 | 1      | 428.8    | (2M+Na)+               | 25.67                |
| 916.4323 | 1      | 222.98   | (2M+Na)+               | 25.7                 |
| 917.4314 | 1      | 113.23   | (2M+Na)+               | 29.92                |

--- End Of Report ---

# Target Compound Screening Report

|                                 |                                        |                               |                                                     |
|---------------------------------|----------------------------------------|-------------------------------|-----------------------------------------------------|
| <b>Data File</b>                | 23.d                                   | <b>Sample Name</b>            | H2997284                                            |
| <b>Sample Type</b>              | Sample                                 | <b>Position</b>               | P1-C5                                               |
| <b>Instrument Name</b>          | Instrument 1                           | <b>User Name</b>              | Denis V.Bylina                                      |
| <b>Acq Method</b>               | Fast_Gradient_HRMS_pos_Lock_08272019.m | <b>Acquired Time</b>          | 9/22/2021 3:50:08 PM (UTC+03:00)                    |
| <b>IRM Calibration Status</b>   | Success                                | <b>DA Method</b>              | 1.m                                                 |
| <b>Comment</b>                  |                                        |                               |                                                     |
| <b>Sample Group</b>             |                                        | <b>Info.</b>                  | Agilent 6224 TOF LC/MS                              |
| <b>MFC</b>                      | C24H27N5O2                             | <b>Stream Name</b>            | LC 1                                                |
| <b>Acquisition Time (Local)</b> | 9/22/2021 3:50:08 PM (UTC+03:00)       | <b>Acquisition SW Version</b> | 6200 series TOF/6500 series Q-TOF B.08.00 (B8058.0) |
| <b>TOF Driver Version</b>       | 8.00.00                                | <b>TOF Firmware Version</b>   | 8.643                                               |
| <b>Tune Mass Range Max.</b>     | 1700                                   |                               |                                                     |

## Compound Table

| Label                       | Tgt Score | Mass Error (ppm) | Tgt Formula   | Obs. RT | Ref. Mass | Obs. Mass |
|-----------------------------|-----------|------------------|---------------|---------|-----------|-----------|
| Cpd 1: C24 H27 N5 O2; 2.439 | 95.42     | 0.87             | C24 H27 N5 O2 | 2.439   | 417.2165  | 417.2168  |

| Obs. m/z | Obs. RT | Obs. Mass | Tgt Formula   | Tgt Mass | Tgt Mass Error (ppm) | RT Diff.        | Find Cpds Algorithm |
|----------|---------|-----------|---------------|----------|----------------------|-----------------|---------------------|
| 418.2241 | 2.439   | 417.2168  | C24 H27 N5 O2 | 417.2165 | 0.87                 | Find By Formula |                     |

## Compound Chromatograms

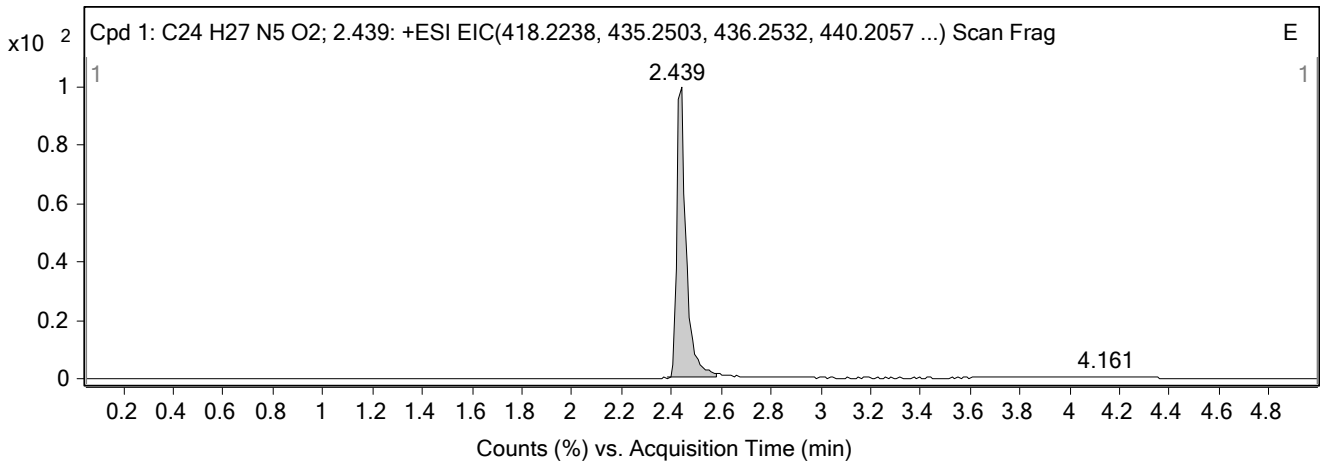

MS Zoomed Spectrum

# Target Compound Screening Report

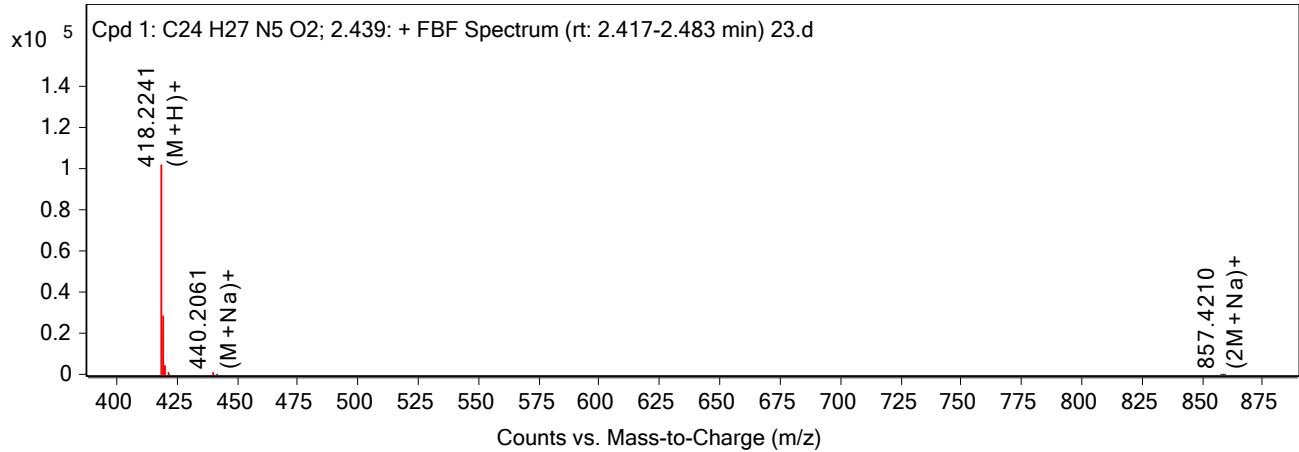

## MS Spectrum Peak List

| Obs. m/z | Charge | Abund     | Ion/Isotope |
|----------|--------|-----------|-------------|
| 418.2241 | 1      | 101648.93 | (M+H)+      |
| 419.2271 | 1      | 23430.54  | (M+H)+      |
| 420.2294 | 1      | 3136.55   | (M+H)+      |
| 421.2344 | 1      | 327.74    | (M+H)+      |
| 440.2061 | 1      | 439       | (M+Na)+     |
| 441.2091 | 1      | 174.28    | (M+Na)+     |
| 857.421  | 1      | 130.35    | (2M+Na)+    |
| 858.4236 | 1      | 94.52     | (2M+Na)+    |
| 859.4354 | 1      | 43.05     | (2M+Na)+    |

## MS Zoomed Spectrum

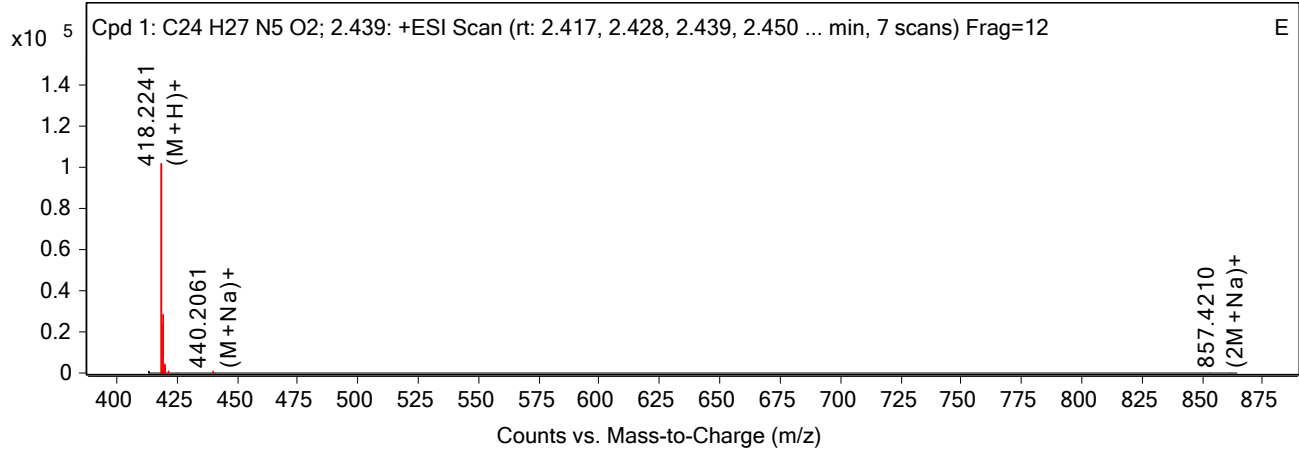

## MS Spectrum Peak List

| Obs. m/z | Charge | Abund     | Ion/Isotope | Tgt Mass Error (ppm) |
|----------|--------|-----------|-------------|----------------------|
| 418.2241 | 1      | 101648.93 | (M+H)+      | -0.89                |
| 419.2271 | 1      | 23430.54  | (M+H)+      | -0.88                |
| 420.2294 | 1      | 3136.55   | (M+H)+      | 0.31                 |
| 421.2344 | 1      | 327.74    | (M+H)+      | -5.23                |
| 440.2061 | 1      | 439       | (M+Na)+     | -0.85                |
| 441.2091 | 1      | 174.28    | (M+Na)+     | -1.03                |
| 857.421  | 1      | 130.35    | (2M+Na)+    | 1.38                 |
| 858.4236 | 1      | 94.52     | (2M+Na)+    | 1.8                  |
| 859.4354 | 1      | 43.05     | (2M+Na)+    | -8.54                |

--- End Of Report ---



# Target Compound Screening Report

|                                 |                                        |                               |                                                     |
|---------------------------------|----------------------------------------|-------------------------------|-----------------------------------------------------|
| <b>Data File</b>                | 35.d                                   | <b>Sample Name</b>            | H3002224                                            |
| <b>Sample Type</b>              | Sample                                 | <b>Position</b>               | P1-D8                                               |
| <b>Instrument Name</b>          | Instrument 1                           | <b>User Name</b>              | Denis V.Bylina                                      |
| <b>Acq Method</b>               | Fast_Gradient_HRMS_pos_Lock_08272019.m | <b>Acquired Time</b>          | 9/23/2021 2:25:29 PM (UTC+03:00)                    |
| <b>IRM Calibration Status</b>   | Success                                | <b>DA Method</b>              | 1.m                                                 |
| <b>Comment</b>                  |                                        |                               |                                                     |
| <b>Sample Group</b>             |                                        | <b>Info.</b>                  | Agilent 6224 TOF LC/MS                              |
| <b>MFC</b>                      | C25H28N4O3                             | <b>Stream Name</b>            | LC 1                                                |
| <b>Acquisition Time (Local)</b> | 9/23/2021 2:25:29 PM (UTC+03:00)       | <b>Acquisition SW Version</b> | 6200 series TOF/6500 series Q-TOF B.08.00 (B8058.0) |
| <b>TOF Driver Version</b>       | 8.00.00                                | <b>TOF Firmware Version</b>   | 8.643                                               |
| <b>Tune Mass Range Max.</b>     | 1700                                   |                               |                                                     |

## Compound Table

| Label                       | Tgt Score | Mass Error (ppm) | Tgt Formula   | Obs. RT | Ref. Mass | Obs. Mass |
|-----------------------------|-----------|------------------|---------------|---------|-----------|-----------|
| Cpd 1: C25 H28 N4 O3; 2.913 | 96.85     | -0.56            | C25 H28 N4 O3 | 2.913   | 432.2161  | 432.2159  |

| Obs. m/z | Obs. RT | Obs. Mass | Tgt Formula   | Tgt Mass | Tgt Mass Error (ppm) | RT Diff.        | Find Cpds Algorithm |
|----------|---------|-----------|---------------|----------|----------------------|-----------------|---------------------|
| 433.2234 | 2.913   | 432.2159  | C25 H28 N4 O3 | 432.2161 | -0.56                | Find By Formula |                     |

## Compound Chromatograms

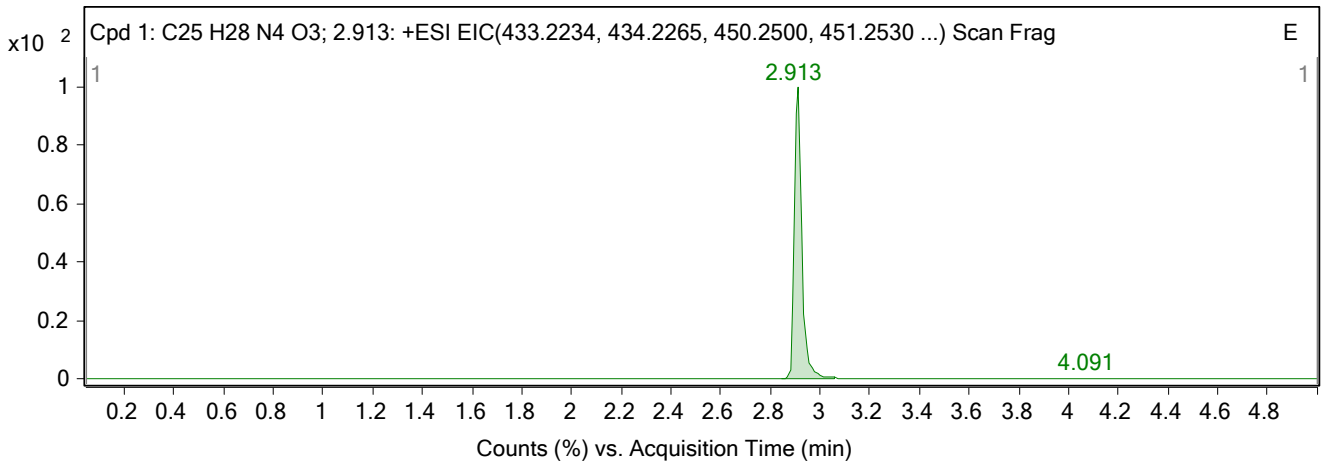

MS Zoomed Spectrum

# Target Compound Screening Report

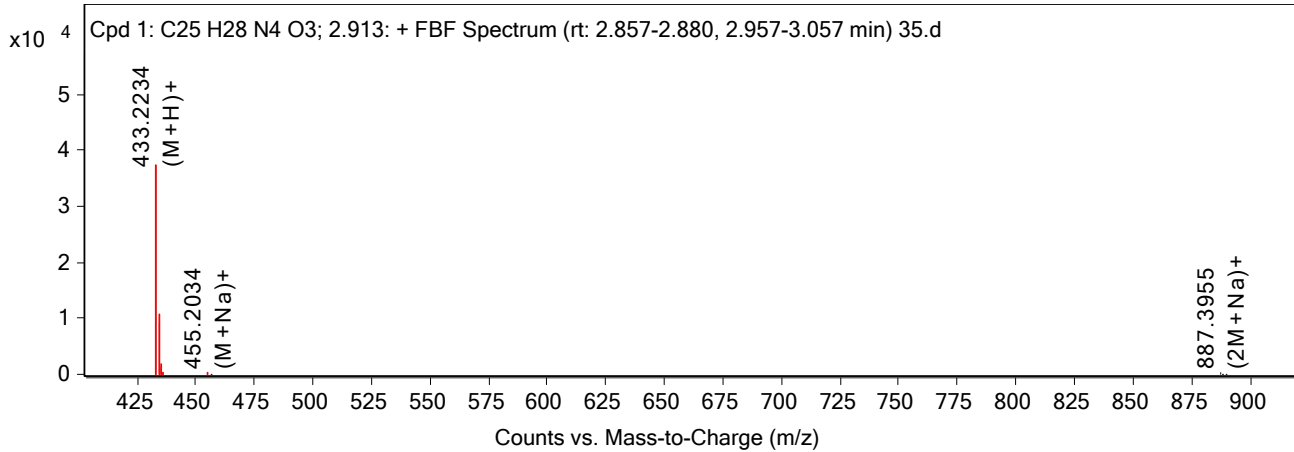

## MS Spectrum Peak List

| Obs. m/z | Charge | Abund    | Ion/Isotope |
|----------|--------|----------|-------------|
| 433.2234 | 1      | 37314.74 | (M+H)+      |
| 434.2262 | 1      | 9180.93  | (M+H)+      |
| 435.2296 | 1      | 1338.14  | (M+H)+      |
| 436.2362 | 1      | 178.25   | (M+H)+      |
| 455.2034 | 1      | 173.94   | (M+Na)+     |
| 456.2136 | 1      | 57.19    | (M+Na)+     |
| 887.3955 | 1      | 214      | (2M+Na)+    |
| 888.403  | 1      | 110.96   | (2M+Na)+    |
| 889.397  | 1      | 72.45    | (2M+Na)+    |

## MS Zoomed Spectrum

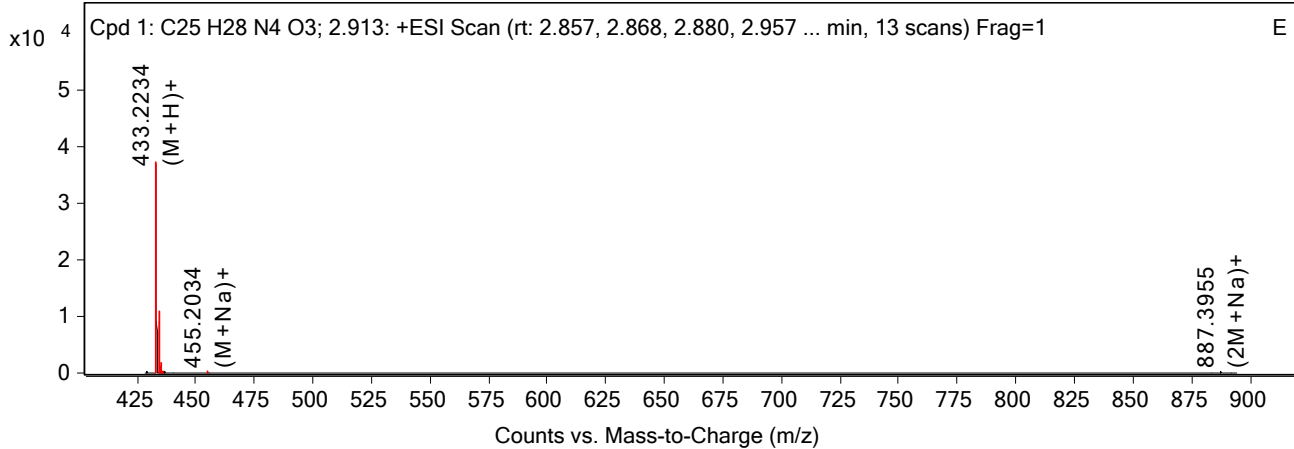

## MS Spectrum Peak List

| Obs. m/z | Charge | Abund    | Ion/Isotope | Tgt Mass Error (ppm) |
|----------|--------|----------|-------------|----------------------|
| 433.2234 | 1      | 37314.74 | (M+H)+      | 0.01                 |
| 433.2234 |        | 37314.74 |             |                      |
| 434.2262 | 1      | 9180.93  | (M+H)+      | 0.67                 |
| 435.2296 | 1      | 1338.14  | (M+H)+      | -0.74                |
| 436.2362 | 1      | 178.25   | (M+H)+      | -9.59                |
| 455.2034 | 1      | 173.94   | (M+Na)+     | 4.32                 |
| 456.2136 | 1      | 57.19    | (M+Na)+     | -11.34               |
| 887.3955 | 1      | 214      | (2M+Na)+    | 29.25                |
| 888.403  | 1      | 110.96   | (2M+Na)+    | 24.3                 |
| 889.397  | 1      | 72.45    | (2M+Na)+    | 34.32                |

--- End Of Report ---

# Target Compound Screening Report

|                                 |                                        |                               |                                                     |
|---------------------------------|----------------------------------------|-------------------------------|-----------------------------------------------------|
| <b>Data File</b>                | 13.d                                   | <b>Sample Name</b>            | H3468064                                            |
| <b>Sample Type</b>              | Sample                                 | <b>Position</b>               | P1-B4                                               |
| <b>Instrument Name</b>          | Instrument 1                           | <b>User Name</b>              | Denis V.Bylina                                      |
| <b>Acq Method</b>               | Fast_Gradient_HRMS_pos_Lock_08272019.m | <b>Acquired Time</b>          | 10/5/2021 6:46:36 PM (UTC+03:00)                    |
| <b>IRM Calibration Status</b>   | Success                                | <b>DA Method</b>              | 1.m                                                 |
| <b>Comment</b>                  |                                        |                               |                                                     |
| <b>Sample Group</b>             |                                        | <b>Info.</b>                  | Agilent 6224 TOF LC/MS                              |
| <b>MFC</b>                      | C19H26N4O2                             | <b>Stream Name</b>            | LC 1                                                |
| <b>Acquisition Time (Local)</b> | 10/5/2021 6:46:36 PM (UTC+03:00)       | <b>Acquisition SW Version</b> | 6200 series TOF/6500 series Q-TOF B.08.00 (B8058.0) |
| <b>TOF Driver Version</b>       | 8.00.00                                | <b>TOF Firmware Version</b>   | 8.643                                               |
| <b>Tune Mass Range Max.</b>     | 1700                                   |                               |                                                     |

## Compound Table

| Label                       | Tgt Score | Mass Error (ppm) | Tgt Formula   | Obs. RT | Ref. Mass | Obs. Mass |
|-----------------------------|-----------|------------------|---------------|---------|-----------|-----------|
| Cpd 1: C19 H26 N4 O2; 2.735 | 96.49     | -1.81            | C19 H26 N4 O2 | 2.735   | 342.2056  | 342.205   |

| Obs. m/z | Obs. RT | Obs. Mass | Tgt Formula   | Tgt Mass | Tgt Mass Error (ppm) | RT Diff.        | Find Cps Algorithm |
|----------|---------|-----------|---------------|----------|----------------------|-----------------|--------------------|
| 343.2122 | 2.735   | 342.205   | C19 H26 N4 O2 | 342.2056 | -1.81                | Find By Formula |                    |

## Compound Chromatograms

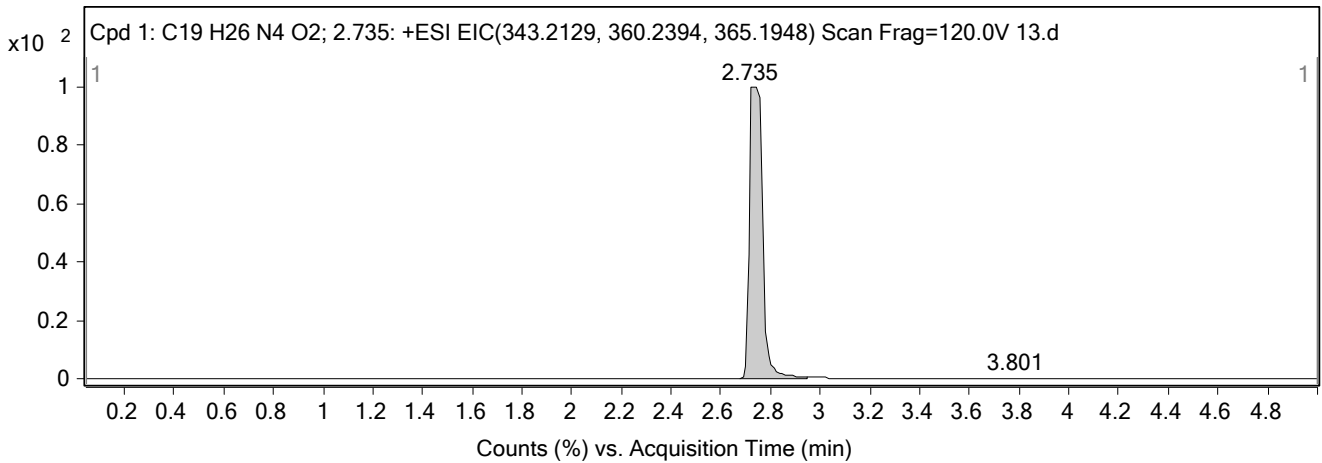

MS Zoomed Spectrum

# Target Compound Screening Report

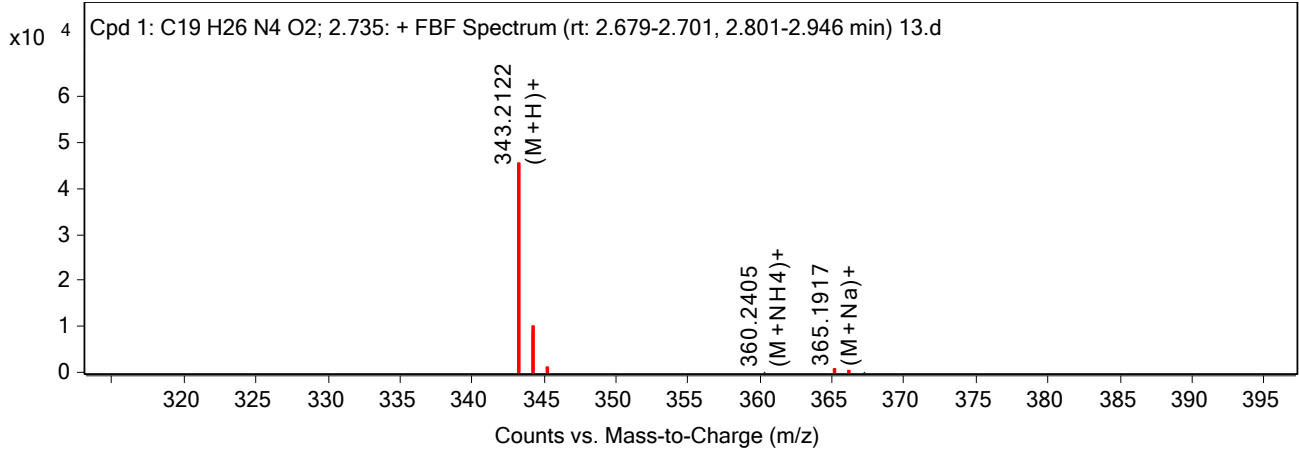

### MS Spectrum Peak List

| Obs. m/z | Charge | Abund    | Ion/Isotope           |
|----------|--------|----------|-----------------------|
| 343.2122 | 1      | 45520.04 | (M+H)+                |
| 344.2155 | 1      | 8649.44  | (M+H)+                |
| 345.2183 | 1      | 1147.63  | (M+H)+                |
| 360.2405 | 1      | 72.71    | (M+NH <sub>4</sub> )+ |
| 365.1917 | 1      | 734.84   | (M+Na)+               |
| 366.1916 | 1      | 225.31   | (M+Na)+               |
| 367.2008 | 1      | 193.96   | (M+Na)+               |

### MS Zoomed Spectrum

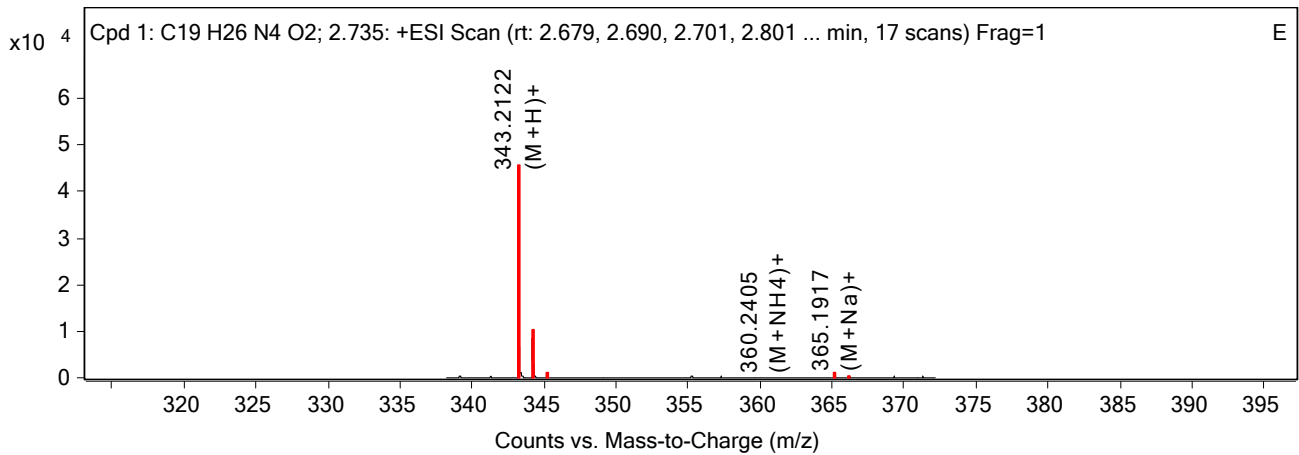

### MS Spectrum Peak List

| Obs. m/z | Charge | Abund    | Ion/Isotope           | Tgt Mass Error (ppm) |
|----------|--------|----------|-----------------------|----------------------|
| 343.2122 | 1      | 45520.04 | (M+H)+                | 1.8                  |
| 344.2155 | 1      | 8649.44  | (M+H)+                | 1.02                 |
| 345.2183 | 1      | 1147.63  | (M+H)+                | 0.78                 |
| 360.2405 | 1      | 72.71    | (M+NH <sub>4</sub> )+ | -3.12                |
| 365.1917 | 1      | 734.84   | (M+Na)+               | 8.53                 |
| 366.1916 | 1      | 225.31   | (M+Na)+               | 16.86                |
| 367.2008 | 1      | 193.96   | (M+Na)+               | -0.95                |

--- End Of Report ---

# Target Compound Screening Report

|                                 |                                        |                               |                                                     |
|---------------------------------|----------------------------------------|-------------------------------|-----------------------------------------------------|
| <b>Data File</b>                | 41.d                                   | <b>Sample Name</b>            | H2976529                                            |
| <b>Sample Type</b>              | Sample                                 | <b>Position</b>               | P1-E5                                               |
| <b>Instrument Name</b>          | Instrument 1                           | <b>User Name</b>              | Denis V.Bylina                                      |
| <b>Acq Method</b>               | Fast_Gradient_HRMS_pos_Lock_08272019.m | <b>Acquired Time</b>          | 9/22/2021 5:30:06 PM (UTC+03:00)                    |
| <b>IRM Calibration Status</b>   | Success                                | <b>DA Method</b>              | 1.m                                                 |
| <b>Comment</b>                  |                                        |                               |                                                     |
| <b>Sample Group</b>             |                                        | <b>Info.</b>                  | Agilent 6224 TOF LC/MS                              |
| <b>MFC</b>                      | C26H30N4O3                             | <b>Stream Name</b>            | LC 1                                                |
| <b>Acquisition Time (Local)</b> | 9/22/2021 5:30:06 PM (UTC+03:00)       | <b>Acquisition SW Version</b> | 6200 series TOF/6500 series Q-TOF B.08.00 (B8058.0) |
| <b>TOF Driver Version</b>       | 8.00.00                                | <b>TOF Firmware Version</b>   | 8.643                                               |
| <b>Tune Mass Range Max.</b>     | 1700                                   |                               |                                                     |

## Compound Table

| Label                       | Tgt Score | Mass Error (ppm) | Tgt Formula   | Obs. RT | Ref. Mass | Obs. Mass |
|-----------------------------|-----------|------------------|---------------|---------|-----------|-----------|
| Cpd 1: C26 H30 N4 O3; 3.218 | 96.59     | -1.84            | C26 H30 N4 O3 | 3.218   | 446.2318  | 446.231   |

| Obs. m/z | Obs. RT | Obs. Mass | Tgt Formula   | Tgt Mass | Tgt Mass Error (ppm) | RT Diff.        | Find Cpds Algorithm |
|----------|---------|-----------|---------------|----------|----------------------|-----------------|---------------------|
| 447.2386 | 3.218   | 446.231   | C26 H30 N4 O3 | 446.2318 | -1.84                | Find By Formula |                     |

## Compound Chromatograms

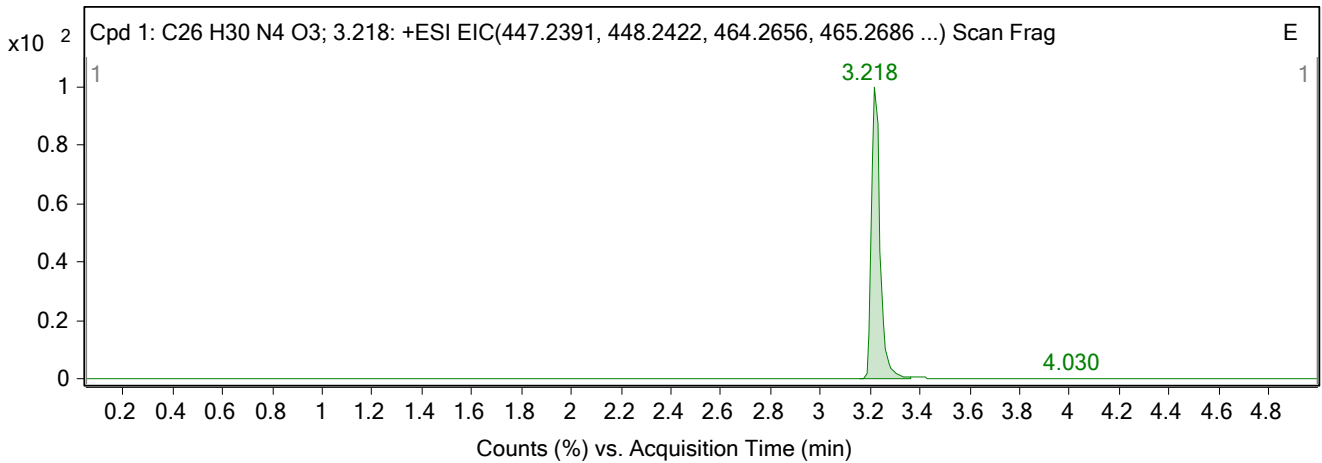

MS Zoomed Spectrum

# Target Compound Screening Report

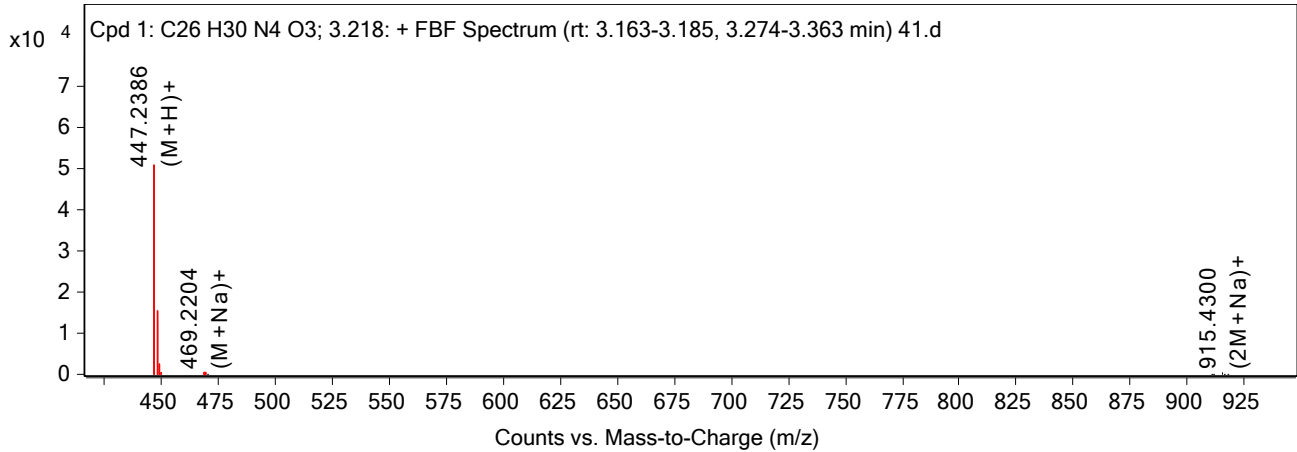

## MS Spectrum Peak List

| Obs. m/z | Charge | Abund    | Ion/Isotope            |
|----------|--------|----------|------------------------|
| 447.2386 | 1      | 50610.57 | (M+H)+                 |
| 448.2415 | 1      | 12972.39 | (M+H)+                 |
| 449.2446 | 1      | 2010.11  | (M+H)+                 |
| 450.2427 | 1      | 279.11   | (M+H)+                 |
| 469.2204 | 1      | 338.14   | (M+Na)+                |
| 470.2219 | 1      | 123.81   | (M+Na)+                |
| 910.4753 | 1      | 85.89    | (2M+NH <sub>4</sub> )+ |
| 915.43   | 1      | 373.4    | (2M+Na)+               |
| 916.4323 | 1      | 187.86   | (2M+Na)+               |
| 917.4275 | 1      | 110.44   | (2M+Na)+               |

## MS Zoomed Spectrum

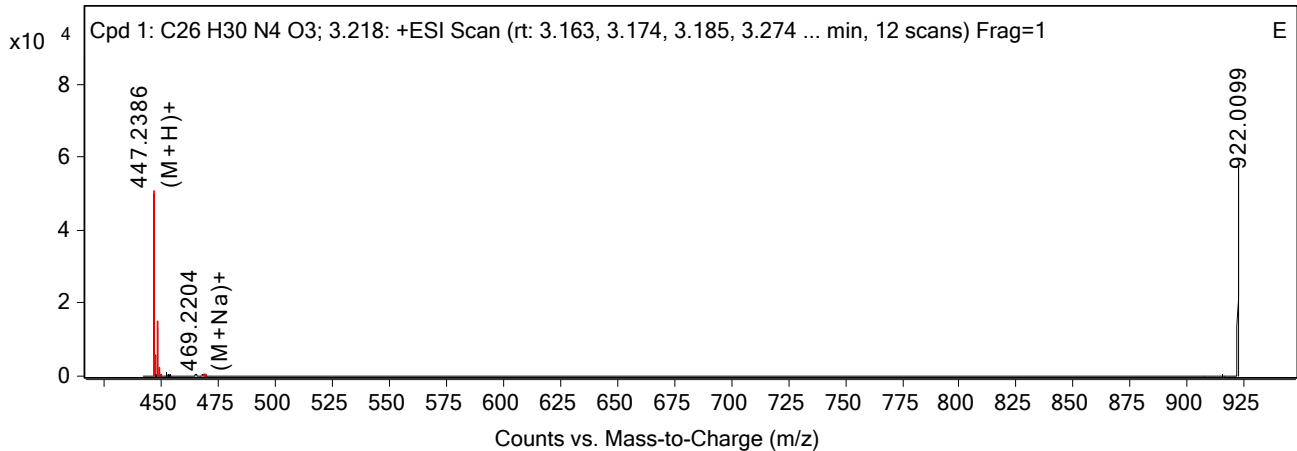

## MS Spectrum Peak List

| Obs. m/z | Charge | Abund    | Ion/Isotope            | Tgt Mass Error (ppm) |
|----------|--------|----------|------------------------|----------------------|
| 447.2386 | 1      | 50610.57 | (M+H)+                 | 1.09                 |
| 448.2415 | 1      | 12972.39 | (M+H)+                 | 1.37                 |
| 449.2446 | 1      | 2010.11  | (M+H)+                 | 0.9                  |
| 450.2427 | 1      | 279.11   | (M+H)+                 | 11.18                |
| 469.2204 | 1      | 338.14   | (M+Na)+                | 1.36                 |
| 470.2219 | 1      | 123.81   | (M+Na)+                | 4.73                 |
| 910.4753 | 1      | 85.89    | (2M+NH <sub>4</sub> )+ | 24.31                |
| 915.43   | 1      | 373.4    | (2M+Na)+               | 24.94                |
| 916.4323 | 1      | 187.86   | (2M+Na)+               | 25.79                |
| 917.4275 | 1      | 110.44   | (2M+Na)+               | 34.16                |

--- End Of Report ---

# Target Compound Screening Report

|                                 |                                        |                               |                                                     |
|---------------------------------|----------------------------------------|-------------------------------|-----------------------------------------------------|
| <b>Data File</b>                | 13.d                                   | <b>Sample Name</b>            | H2980129                                            |
| <b>Sample Type</b>              | Sample                                 | <b>Position</b>               | P1-B4                                               |
| <b>Instrument Name</b>          | Instrument 1                           | <b>User Name</b>              | Denis V.Bylina                                      |
| <b>Acq Method</b>               | Fast_Gradient_HRMS_pos_Lock_08272019.m | <b>Acquired Time</b>          | 9/23/2021 12:23:09 PM (UTC+03:00)                   |
| <b>IRM Calibration Status</b>   | Success                                | <b>DA Method</b>              | 1.m                                                 |
| <b>Comment</b>                  |                                        |                               |                                                     |
| <b>Sample Group</b>             |                                        | <b>Info.</b>                  | Agilent 6224 TOF LC/MS                              |
| <b>MFC</b>                      | C20H28N2O5S2                           | <b>Stream Name</b>            | LC 1                                                |
| <b>Acquisition Time (Local)</b> | 9/23/2021 12:23:09 PM (UTC+03:00)      | <b>Acquisition SW Version</b> | 6200 series TOF/6500 series Q-TOF B.08.00 (B8058.0) |
| <b>TOF Driver Version</b>       | 8.00.00                                | <b>TOF Firmware Version</b>   | 8.643                                               |
| <b>Tune Mass Range Max.</b>     | 1700                                   |                               |                                                     |

## Compound Table

| Label                          | Tgt Score | Mass Error (ppm) | Tgt Formula      | Obs. RT | Ref. Mass | Obs. Mass |
|--------------------------------|-----------|------------------|------------------|---------|-----------|-----------|
| Cpd 1: C20 H28 N2 O5 S2; 3.024 | 96.73     | -0.7             | C20 H28 N2 O5 S2 | 3.024   | 440.144   | 440.1437  |

| Obs. m/z | Obs. RT | Obs. Mass | Tgt Formula      | Tgt Mass | Tgt Mass Error (ppm) | RT Diff.        | Find Cpds Algorithm |
|----------|---------|-----------|------------------|----------|----------------------|-----------------|---------------------|
| 463.1323 | 3.024   | 440.1437  | C20 H28 N2 O5 S2 | 440.144  | -0.7                 | Find By Formula |                     |

## Compound Chromatograms

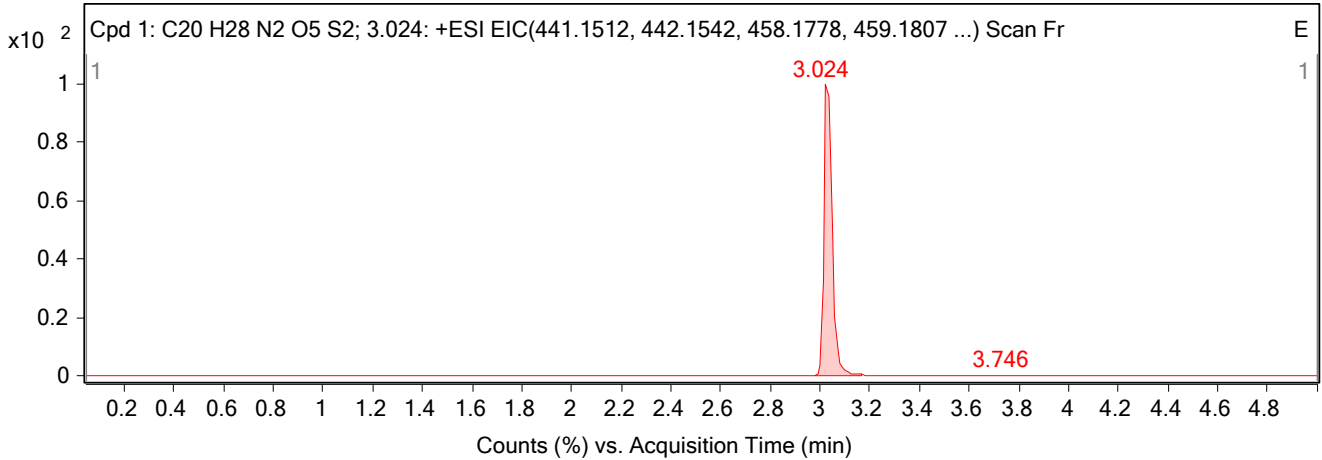

## MS Zoomed Spectrum

# Target Compound Screening Report

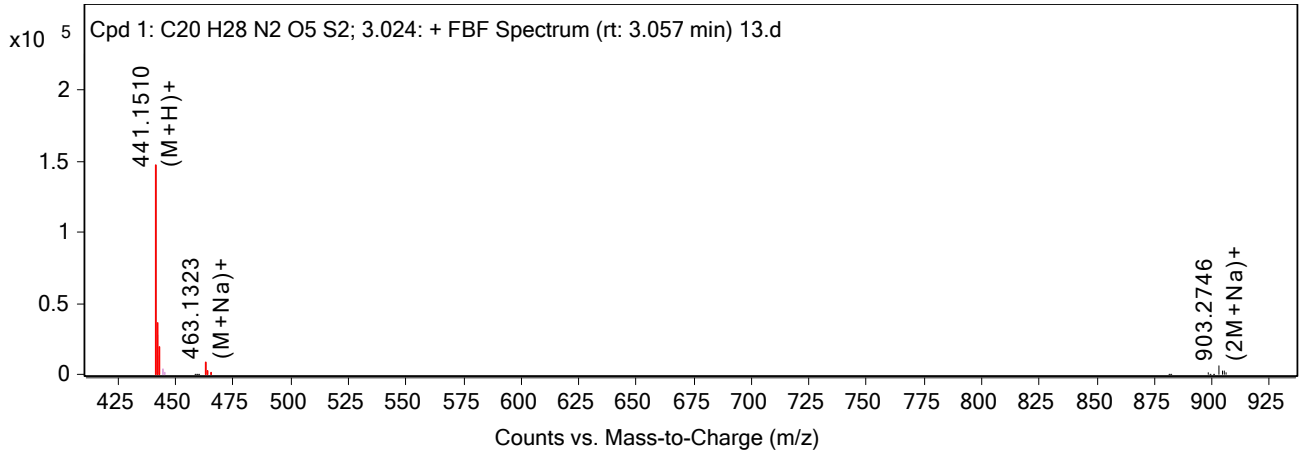

## MS Spectrum Peak List

| Obs. m/z | Charge | Abund     | Ion/Isotope |
|----------|--------|-----------|-------------|
| 441.151  | 1      | 146924.36 | (M+H)+      |
| 442.1547 | 1      | 28280.64  | (M+H)+      |
| 443.1495 | 1      | 13634.68  | (M+H)+      |
| 463.1323 | 1      | 7949.02   | (M+Na)+     |
| 464.1344 | 1      | 1902.66   | (M+Na)+     |
| 465.1319 | 1      | 941.89    | (M+Na)+     |
| 903.2746 | 1      | 6345.11   | (2M+Na)+    |
| 904.2804 | 1      | 3035.1    | (2M+Na)+    |
| 905.2749 | 1      | 2238.02   | (2M+Na)+    |
| 906.2766 | 1      | 689.22    | (2M+Na)+    |

## MS Zoomed Spectrum

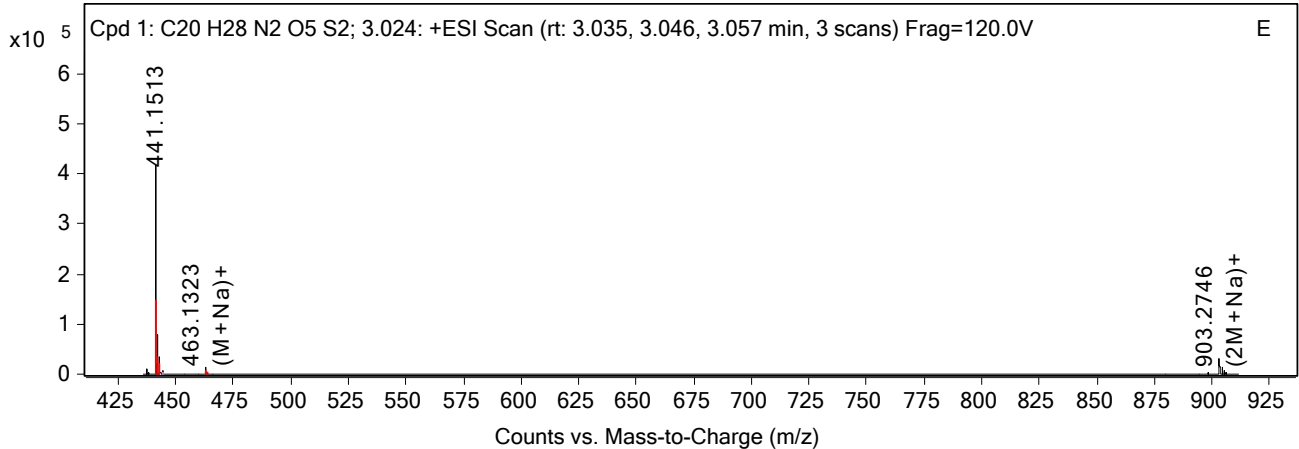

## MS Spectrum Peak List

| Obs. m/z | Charge | Abund     | Ion/Isotope | Tgt Mass Error (ppm) |
|----------|--------|-----------|-------------|----------------------|
| 441.151  | 1      | 146924.36 | (M+H)+      | 0.51                 |
| 442.1547 | 1      | 28280.64  | (M+H)+      | -1.16                |
| 443.1495 | 1      | 13634.68  | (M+H)+      | 1.03                 |
| 463.1323 | 1      | 7949.02   | (M+Na)+     | 1.97                 |
| 464.1344 | 1      | 1902.66   | (M+Na)+     | 3.76                 |
| 465.1319 | 1      | 941.89    | (M+Na)+     | 0.12                 |
| 903.2746 | 1      | 6345.11   | (2M+Na)+    | 2.81                 |
| 904.2804 | 1      | 3035.1    | (2M+Na)+    | -0.38                |
| 905.2749 | 1      | 2238.02   | (2M+Na)+    | 2.56                 |
| 906.2766 | 1      | 689.22    | (2M+Na)+    | 1.93                 |

--- End Of Report ---



## Target Compound Screening Report

|                                 |                                        |                               |                                                     |
|---------------------------------|----------------------------------------|-------------------------------|-----------------------------------------------------|
| <b>Data File</b>                | 1e.d                                   | <b>Sample Name</b>            | H3475361                                            |
| <b>Sample Type</b>              | Sample                                 | <b>Position</b>               | P1-A1                                               |
| <b>Instrument Name</b>          | Instrument 1                           | <b>User Name</b>              | Denis V.Bylina                                      |
| <b>Acq Method</b>               | Fast_Gradient_HRMS_pos_Lock_08272019.m | <b>Acquired Time</b>          | 10/8/2021 9:39:00 AM (UTC+03:00)                    |
| <b>IRM Calibration Status</b>   | Success                                | <b>DA Method</b>              | 1.m                                                 |
| <b>Comment</b>                  |                                        |                               |                                                     |
| <b>Sample Group</b>             |                                        | <b>Info.</b>                  | Agilent 6224 TOF LC/MS                              |
| <b>MFC</b>                      | C20H28N2O5S2                           | <b>Stream Name</b>            | LC 1                                                |
| <b>Acquisition Time (Local)</b> | 10/8/2021 9:39:00 AM (UTC+03:00)       | <b>Acquisition SW Version</b> | 6200 series TOF/6500 series Q-TOF B.08.00 (B8058.0) |
| <b>TOF Driver Version</b>       | 8.00.00                                | <b>TOF Firmware Version</b>   | 8.643                                               |
| <b>Tune Mass Range Max.</b>     | 1700                                   |                               |                                                     |

### Compound Table

| Label                          | Tgt Score | Mass Error (ppm) | Tgt Formula      | Obs. RT | Ref. Mass | Obs. Mass |
|--------------------------------|-----------|------------------|------------------|---------|-----------|-----------|
| Cpd 1: C20 H28 N2 O5 S2; 3.131 | 94.12     | 1.25             | C20 H28 N2 O5 S2 | 3.131   | 440.144   | 440.1445  |

| Obs. m/z | Obs. RT | Obs. Mass | Tgt Formula      | Tgt Mass | Tgt Mass Error (ppm) | RT Diff.        | Find Cpds Algorithm |
|----------|---------|-----------|------------------|----------|----------------------|-----------------|---------------------|
| 441.152  | 3.131   | 440.1445  | C20 H28 N2 O5 S2 | 440.144  | 1.25                 | Find By Formula |                     |

### Compound Chromatograms

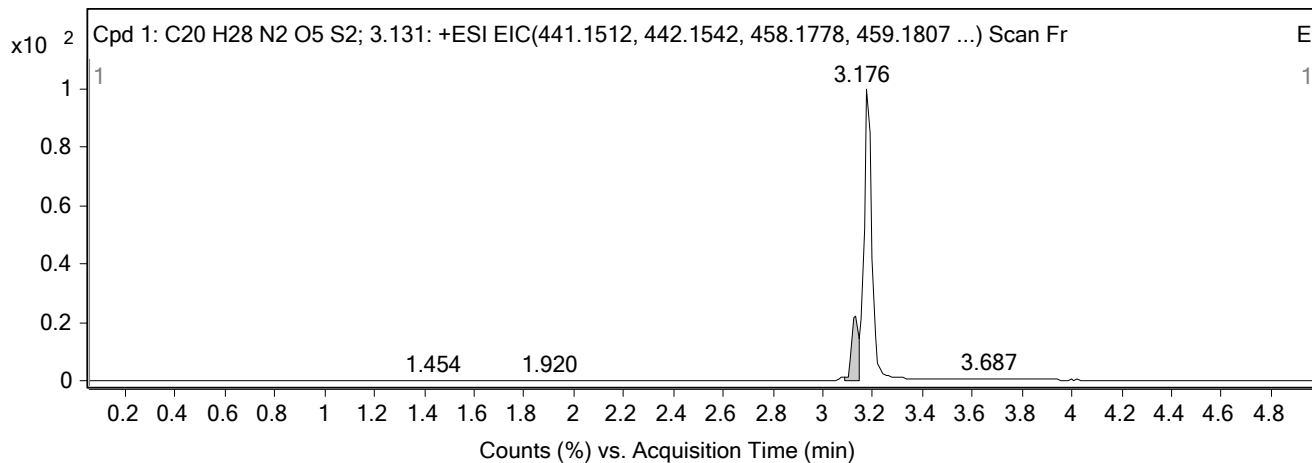

MS Zoomed Spectrum

# Target Compound Screening Report

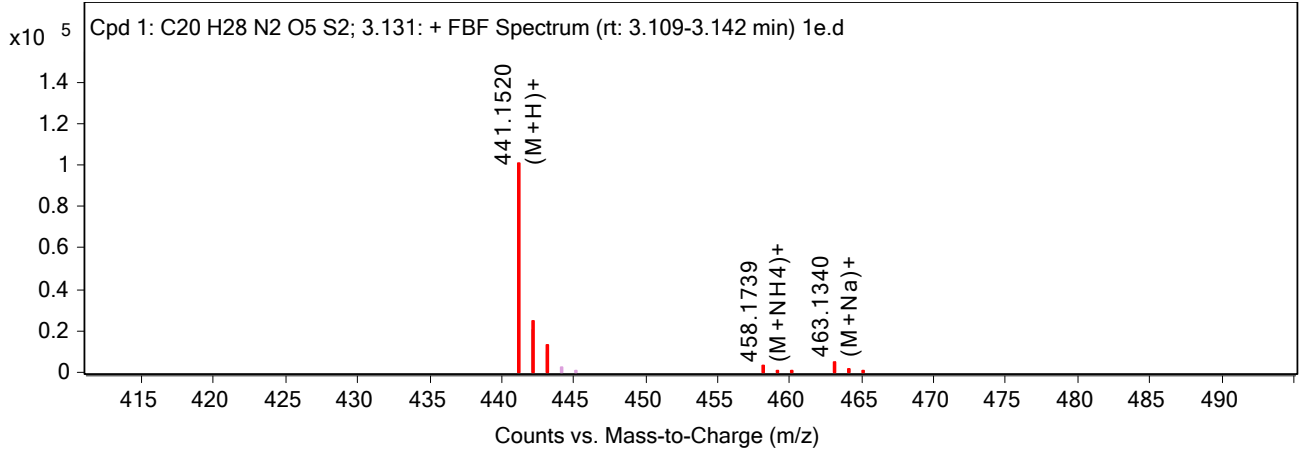

## MS Spectrum Peak List

| Obs. m/z | Charge | Abund     | Ion/Isotope           |
|----------|--------|-----------|-----------------------|
| 441.152  | 1      | 100866.29 | (M+H)+                |
| 442.1545 | 1      | 20527.08  | (M+H)+                |
| 443.1511 | 1      | 9943.68   | (M+H)+                |
| 458.1739 | 1      | 3113.27   | (M+NH <sub>4</sub> )+ |
| 459.174  | 1      | 812.08    | (M+NH <sub>4</sub> )+ |
| 460.1649 | 1      | 552       | (M+NH <sub>4</sub> )+ |
| 463.134  | 1      | 5133.08   | (M+Na)+               |
| 464.1377 | 1      | 1344.4    | (M+Na)+               |
| 465.1361 | 1      | 765.3     | (M+Na)+               |

## MS Zoomed Spectrum

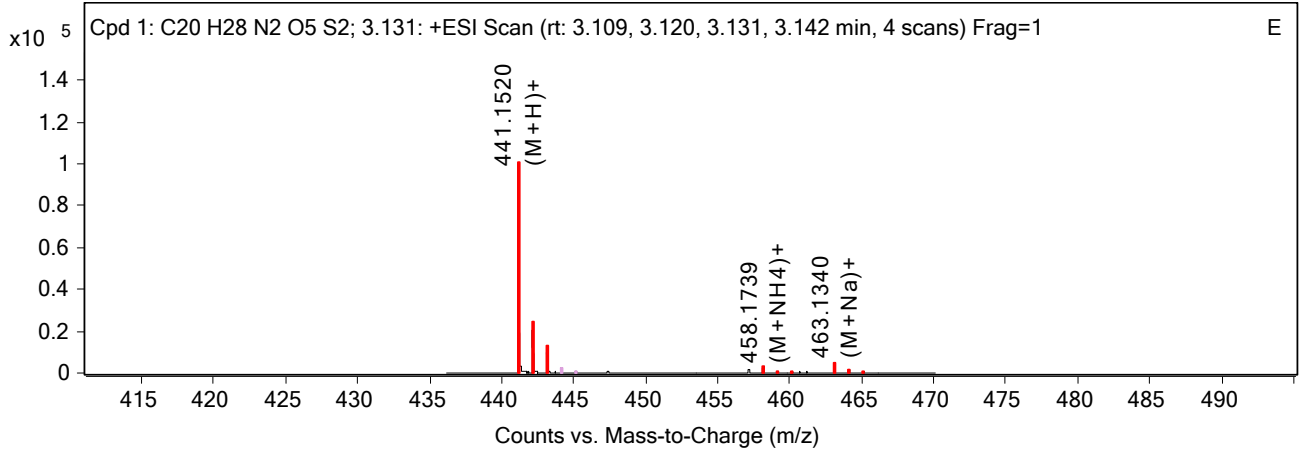

## MS Spectrum Peak List

| Obs. m/z | Charge | Abund     | Ion/Isotope           | Tgt Mass Error (ppm) |
|----------|--------|-----------|-----------------------|----------------------|
| 441.152  | 1      | 100866.29 | (M+H)+                | -1.7                 |
| 442.1545 | 1      | 20527.08  | (M+H)+                | -0.66                |
| 443.1511 | 1      | 9943.68   | (M+H)+                | -2.63                |
| 458.1739 | 1      | 3113.27   | (M+NH <sub>4</sub> )+ | 8.54                 |
| 459.174  | 1      | 812.08    | (M+NH <sub>4</sub> )+ | 14.44                |
| 460.1649 | 1      | 552       | (M+NH <sub>4</sub> )+ | 25.31                |
| 463.134  | 1      | 5133.08   | (M+Na)+               | -1.81                |
| 464.1377 | 1      | 1344.4    | (M+Na)+               | -3.43                |
| 465.1361 | 1      | 765.3     | (M+Na)+               | -9.11                |

--- End Of Report ---

# Target Compound Screening Report

|                                 |                                        |                               |                                                     |
|---------------------------------|----------------------------------------|-------------------------------|-----------------------------------------------------|
| <b>Data File</b>                | 2.d                                    | <b>Sample Name</b>            | H3475364                                            |
| <b>Sample Type</b>              | Sample                                 | <b>Position</b>               | P1-A2                                               |
| <b>Instrument Name</b>          | Instrument 1                           | <b>User Name</b>              | Denis V.Bylina                                      |
| <b>Acq Method</b>               | Fast_Gradient_HRMS_pos_Lock_08272019.m | <b>Acquired Time</b>          | 10/7/2021 4:47:21 PM (UTC+03:00)                    |
| <b>IRM Calibration Status</b>   | Success                                | <b>DA Method</b>              | 1.m                                                 |
| <b>Comment</b>                  |                                        |                               |                                                     |
| <b>Sample Group</b>             |                                        | <b>Info.</b>                  | Agilent 6224 TOF LC/MS                              |
| <b>MFC</b>                      | C20H28N2O5S2                           | <b>Stream Name</b>            | LC 1                                                |
| <b>Acquisition Time (Local)</b> | 10/7/2021 4:47:21 PM (UTC+03:00)       | <b>Acquisition SW Version</b> | 6200 series TOF/6500 series Q-TOF B.08.00 (B8058.0) |
| <b>TOF Driver Version</b>       | 8.00.00                                | <b>TOF Firmware Version</b>   | 8.643                                               |
| <b>Tune Mass Range Max.</b>     | 1700                                   |                               |                                                     |

## Compound Table

| Label                          | Tgt Score | Mass Error (ppm) | Tgt Formula      | Obs. RT | Ref. Mass | Obs. Mass |
|--------------------------------|-----------|------------------|------------------|---------|-----------|-----------|
| Cpd 1: C20 H28 N2 O5 S2; 3.133 | 90.61     | 2.86             | C20 H28 N2 O5 S2 | 3.133   | 440.144   | 440.1452  |

| Obs. m/z | Obs. RT | Obs. Mass | Tgt Formula      | Tgt Mass | Tgt Mass Error (ppm) | RT Diff.        | Find Cpds Algorithm |
|----------|---------|-----------|------------------|----------|----------------------|-----------------|---------------------|
| 441.1523 | 3.133   | 440.1452  | C20 H28 N2 O5 S2 | 440.144  | 2.86                 | Find By Formula |                     |

## Compound Chromatograms

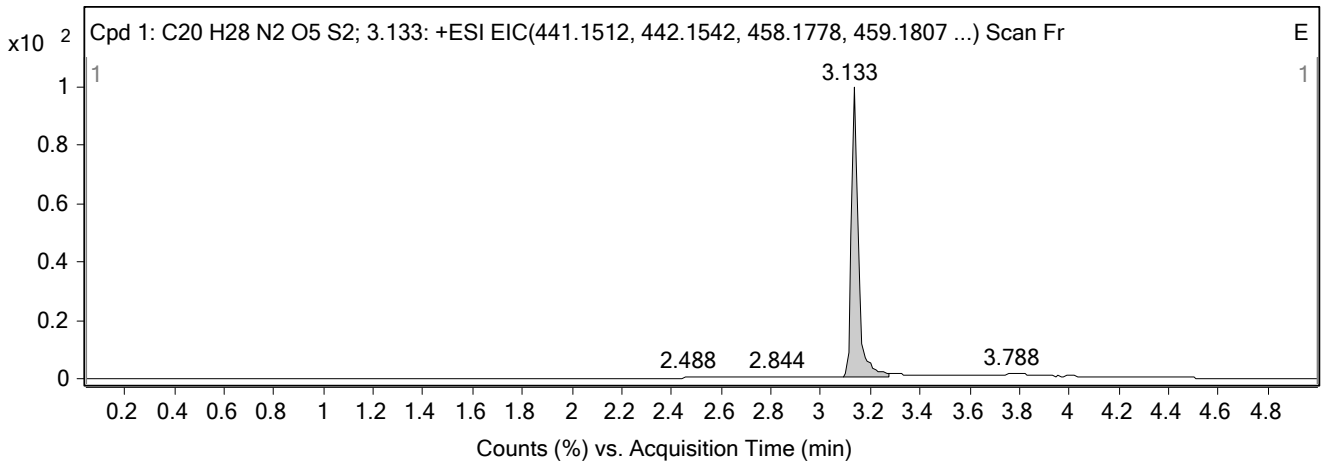

MS Zoomed Spectrum

# Target Compound Screening Report

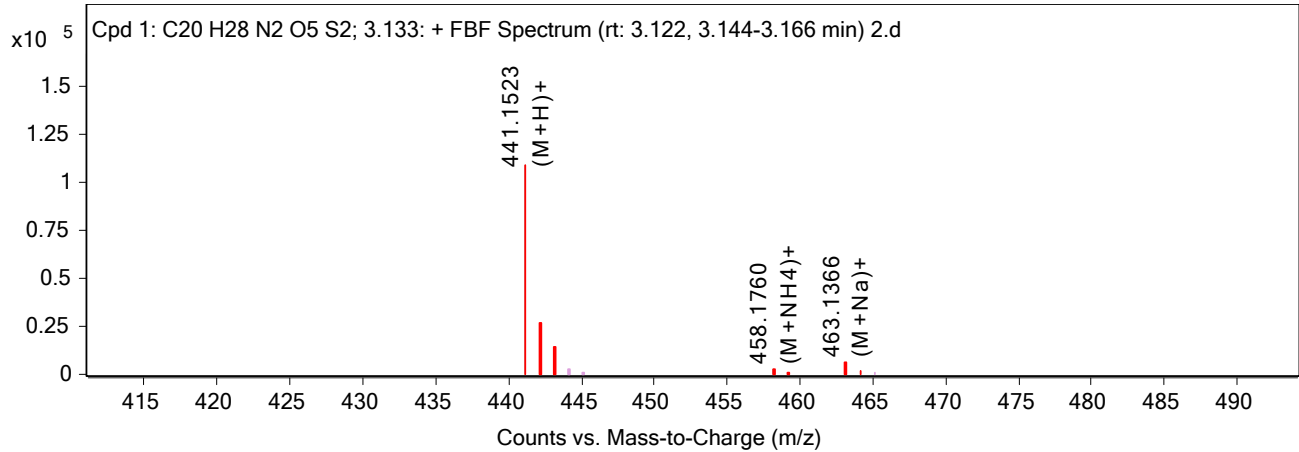

## MS Spectrum Peak List

| Obs. m/z | Charge | Abund     | Ion/Isotope           |
|----------|--------|-----------|-----------------------|
| 441.1523 | 1      | 109257.45 | (M+H)+                |
| 442.1555 | 1      | 21399.08  | (M+H)+                |
| 443.1523 | 1      | 10442.96  | (M+H)+                |
| 458.176  | 1      | 2902.92   | (M+NH <sub>4</sub> )+ |
| 459.1787 | 1      | 859.51    | (M+NH <sub>4</sub> )+ |
| 463.1366 | 1      | 6463.25   | (M+Na)+               |
| 464.1418 | 1      | 1621.39   | (M+Na)+               |

## MS Zoomed Spectrum

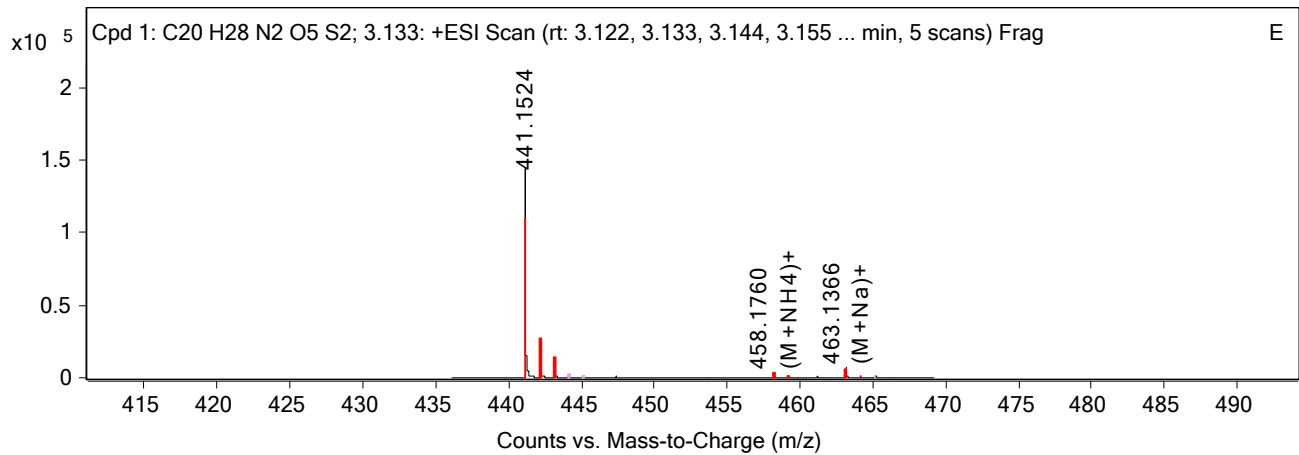

## MS Spectrum Peak List

| Obs. m/z | Charge | Abund     | Ion/Isotope           | Tgt Mass Error (ppm) |
|----------|--------|-----------|-----------------------|----------------------|
| 441.1523 | 1      | 109257.44 | (M+H)+                | -2.4                 |
| 441.1524 |        | 143903.64 |                       |                      |
| 442.1555 | 1      | 21399.08  | (M+H)+                | -2.99                |
| 443.1523 | 1      | 10442.96  | (M+H)+                | -5.17                |
| 458.176  | 1      | 2902.92   | (M+NH <sub>4</sub> )+ | 3.82                 |
| 459.1787 | 1      | 859.51    | (M+NH <sub>4</sub> )+ | 4.31                 |
| 463.1366 | 1      | 6463.25   | (M+Na)+               | -7.37                |
| 464.1418 | 1      | 1621.39   | (M+Na)+               | -12.29               |

--- End Of Report ---

# Target Compound Screening Report

|                                 |                                        |                               |                                                     |
|---------------------------------|----------------------------------------|-------------------------------|-----------------------------------------------------|
| <b>Data File</b>                | 31.d                                   | <b>Sample Name</b>            | H2979259                                            |
| <b>Sample Type</b>              | Sample                                 | <b>Position</b>               | P1-D4                                               |
| <b>Instrument Name</b>          | Instrument 1                           | <b>User Name</b>              | Denis V.Bylina                                      |
| <b>Acq Method</b>               | Fast_Gradient_HRMS_pos_Lock_08272019.m | <b>Acquired Time</b>          | 9/22/2021 4:34:35 PM (UTC+03:00)                    |
| <b>IRM Calibration Status</b>   | Success                                | <b>DA Method</b>              | 1.m                                                 |
| <b>Comment</b>                  |                                        |                               |                                                     |
| <b>Sample Group</b>             |                                        | <b>Info.</b>                  | Agilent 6224 TOF LC/MS                              |
| <b>MFC</b>                      | C20H28N2O5S2                           | <b>Stream Name</b>            | LC 1                                                |
| <b>Acquisition Time (Local)</b> | 9/22/2021 4:34:35 PM (UTC+03:00)       | <b>Acquisition SW Version</b> | 6200 series TOF/6500 series Q-TOF B.08.00 (B8058.0) |
| <b>TOF Driver Version</b>       | 8.00.00                                | <b>TOF Firmware Version</b>   | 8.643                                               |
| <b>Tune Mass Range Max.</b>     | 1700                                   |                               |                                                     |

## Compound Table

| Label                          | Tgt Score | Mass Error (ppm) | Tgt Formula      | Obs. RT | Ref. Mass | Obs. Mass |
|--------------------------------|-----------|------------------|------------------|---------|-----------|-----------|
| Cpd 1: C20 H28 N2 O5 S2; 3.105 | 97.6      | -0.76            | C20 H28 N2 O5 S2 | 3.105   | 440.144   | 440.1436  |

| Obs. m/z | Obs. RT | Obs. Mass | Tgt Formula      | Tgt Mass | Tgt Mass Error (ppm) | RT Diff.        | Find Cpds Algorithm |
|----------|---------|-----------|------------------|----------|----------------------|-----------------|---------------------|
| 463.1324 | 3.105   | 440.1436  | C20 H28 N2 O5 S2 | 440.144  | -0.76                | Find By Formula |                     |

## Compound Chromatograms

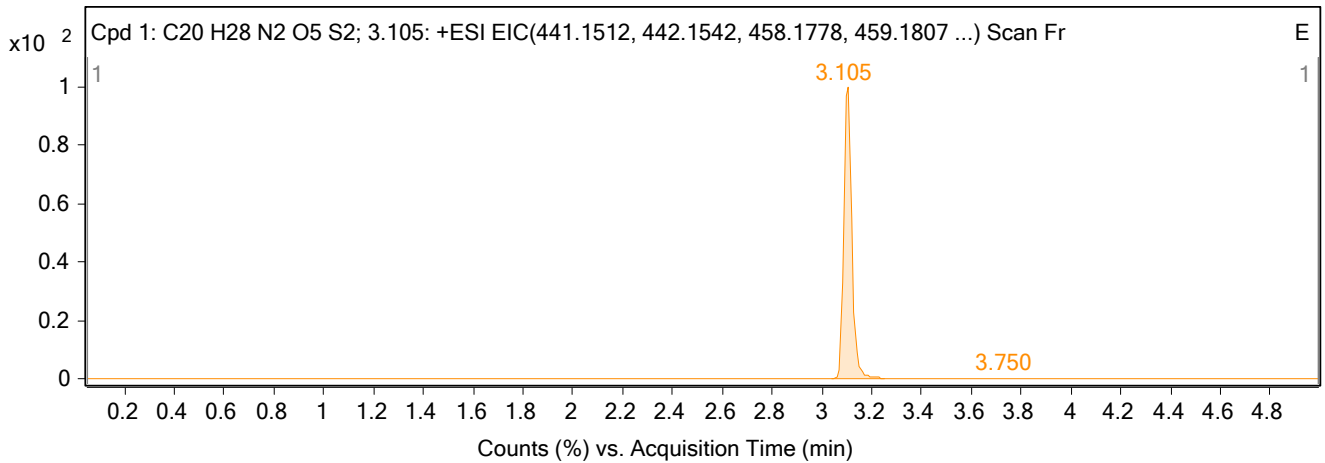

MS Zoomed Spectrum

# Target Compound Screening Report

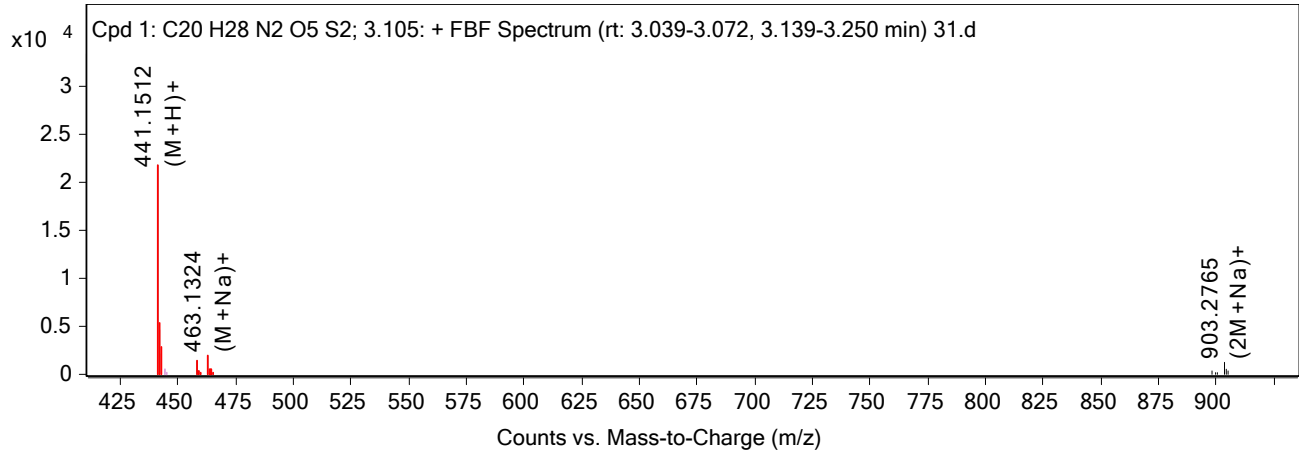

## MS Spectrum Peak List

| Obs. m/z | Charge | Abund    | Ion/Isotope |
|----------|--------|----------|-------------|
| 441.1512 | 1      | 21739.97 | (M+H)+      |
| 442.1539 | 1      | 4615.2   | (M+H)+      |
| 443.1504 | 1      | 2208.88  | (M+H)+      |
| 458.1759 | 1      | 1486.77  | (M+NH4)+    |
| 463.1324 | 1      | 1914.03  | (M+Na)+     |
| 464.1356 | 1      | 452.92   | (M+Na)+     |
| 898.3196 | 1      | 438.8    | (2M+NH4)+   |
| 903.2765 | 1      | 1221.36  | (2M+Na)+    |
| 904.2777 | 1      | 572.66   | (2M+Na)+    |
| 905.2738 | 1      | 391.82   | (2M+Na)+    |

## MS Zoomed Spectrum

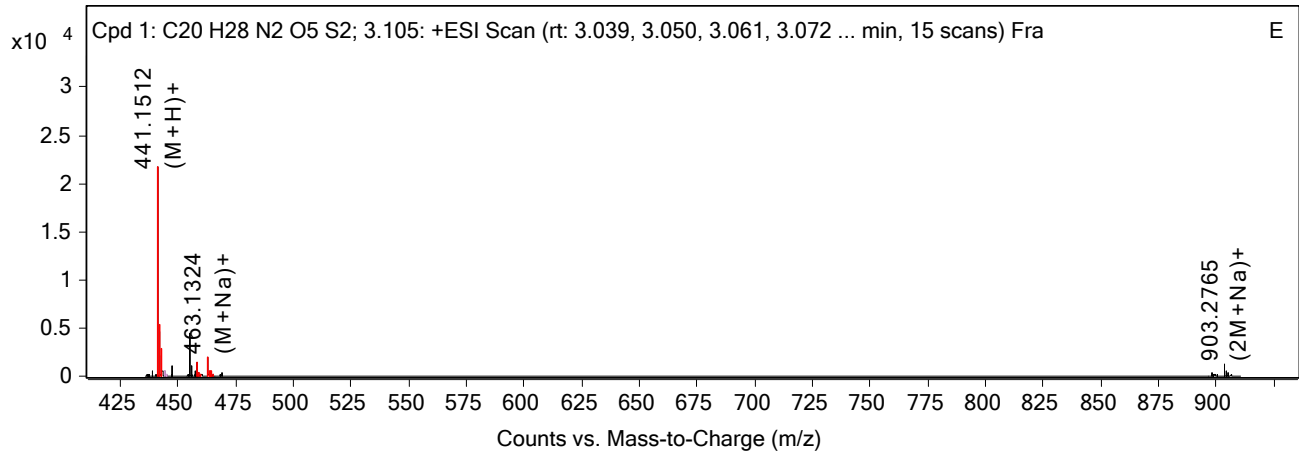

## MS Spectrum Peak List

| Obs. m/z | Charge | Abund    | Ion/Isotope | Tgt Mass Error (ppm) |
|----------|--------|----------|-------------|----------------------|
| 441.1512 | 1      | 21739.98 | (M+H)+      | 0.01                 |
| 442.1539 | 1      | 4615.2   | (M+H)+      | 0.67                 |
| 443.1504 | 1      | 2208.88  | (M+H)+      | -0.92                |
| 458.1759 | 1      | 1486.77  | (M+NH4)+    | 4.17                 |
| 463.1324 | 1      | 1914.03  | (M+Na)+     | 1.77                 |
| 464.1356 | 1      | 452.92   | (M+Na)+     | 1.23                 |
| 898.3196 | 1      | 438.8    | (2M+NH4)+   | 2.43                 |
| 903.2765 | 1      | 1221.36  | (2M+Na)+    | 0.75                 |
| 904.2777 | 1      | 572.66   | (2M+Na)+    | 2.66                 |
| 905.2738 | 1      | 391.82   | (2M+Na)+    | 3.84                 |

--- End Of Report ---

# Target Compound Screening Report

|                                 |                                        |                               |                                                     |
|---------------------------------|----------------------------------------|-------------------------------|-----------------------------------------------------|
| <b>Data File</b>                | 28.d                                   | <b>Sample Name</b>            | H2976537                                            |
| <b>Sample Type</b>              | Sample                                 | <b>Position</b>               | P1-D1                                               |
| <b>Instrument Name</b>          | Instrument 1                           | <b>User Name</b>              | Denis V.Bylina                                      |
| <b>Acq Method</b>               | Fast_Gradient_HRMS_pos_Lock_08272019.m | <b>Acquired Time</b>          | 9/23/2021 1:46:35 PM (UTC+03:00)                    |
| <b>IRM Calibration Status</b>   | Success                                | <b>DA Method</b>              | 1.m                                                 |
| <b>Comment</b>                  |                                        |                               |                                                     |
| <b>Sample Group</b>             |                                        | <b>Info.</b>                  | Agilent 6224 TOF LC/MS                              |
| <b>MFC</b>                      | C26H30N4O3                             | <b>Stream Name</b>            | LC 1                                                |
| <b>Acquisition Time (Local)</b> | 9/23/2021 1:46:35 PM (UTC+03:00)       | <b>Acquisition SW Version</b> | 6200 series TOF/6500 series Q-TOF B.08.00 (B8058.0) |
| <b>TOF Driver Version</b>       | 8.00.00                                | <b>TOF Firmware Version</b>   | 8.643                                               |
| <b>Tune Mass Range Max.</b>     | 1700                                   |                               |                                                     |

## Compound Table

| Label                       | Tgt Score | Mass Error (ppm) | Tgt Formula   | Obs. RT | Ref. Mass | Obs. Mass |
|-----------------------------|-----------|------------------|---------------|---------|-----------|-----------|
| Cpd 1: C26 H30 N4 O3; 2.945 | 97.65     | -1               | C26 H30 N4 O3 | 2.945   | 446.2318  | 446.2313  |

| Obs. m/z | Obs. RT | Obs. Mass | Tgt Formula   | Tgt Mass | Tgt Mass Error (ppm) | RT Diff.        | Find Cpds Algorithm |
|----------|---------|-----------|---------------|----------|----------------------|-----------------|---------------------|
| 447.2389 | 2.945   | 446.2313  | C26 H30 N4 O3 | 446.2318 | -1                   | Find By Formula |                     |

## Compound Chromatograms

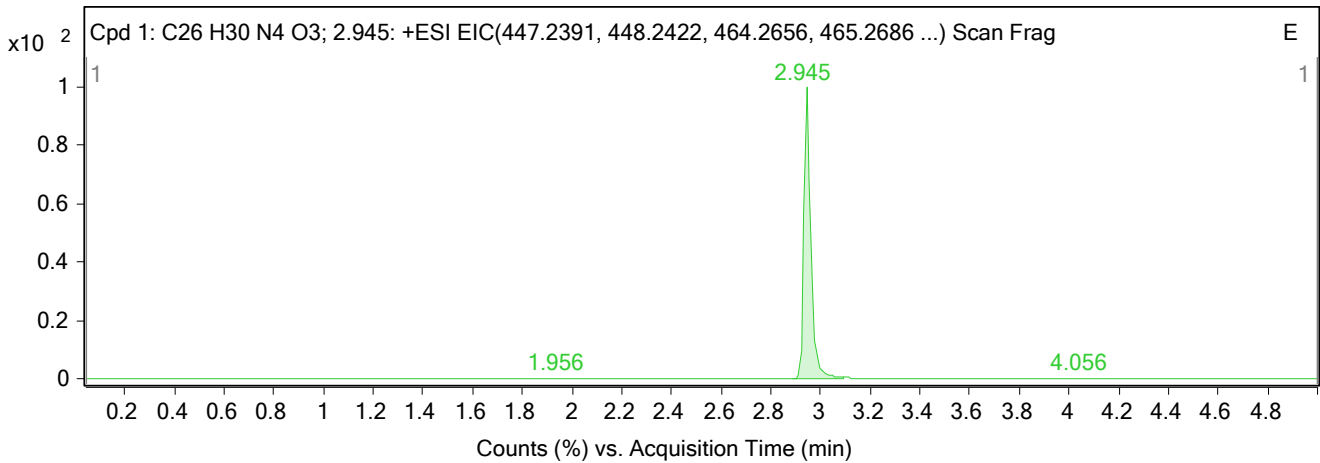

MS Zoomed Spectrum

# Target Compound Screening Report

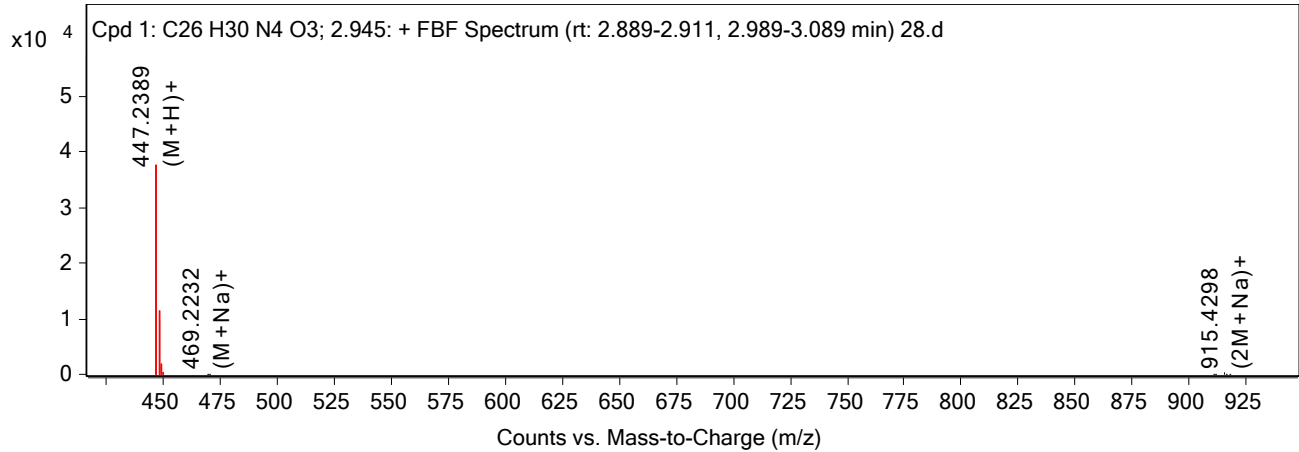

## MS Spectrum Peak List

| Obs. m/z | Charge | Abund    | Ion/Isotope            |
|----------|--------|----------|------------------------|
| 447.2389 | 1      | 37493.01 | (M+H)+                 |
| 448.2419 | 1      | 9841.59  | (M+H)+                 |
| 449.2446 | 1      | 1650.6   | (M+H)+                 |
| 450.2459 | 1      | 220.41   | (M+H)+                 |
| 469.2232 | 1      | 100.21   | (M+Na)+                |
| 910.4793 | 1      | 72.39    | (2M+NH <sub>4</sub> )+ |
| 911.4782 | 1      | 59.38    | (2M+NH <sub>4</sub> )+ |
| 915.4298 | 1      | 279.26   | (2M+Na)+               |
| 916.4382 | 1      | 141.54   | (2M+Na)+               |
| 917.4322 | 1      | 75.55    | (2M+Na)+               |

## MS Zoomed Spectrum

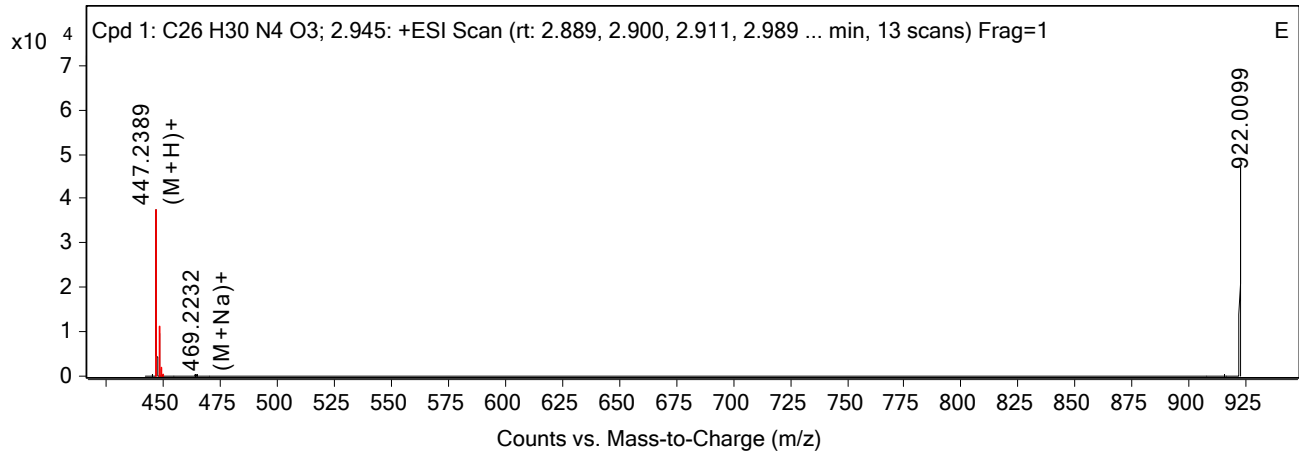

## MS Spectrum Peak List

| Obs. m/z | Charge | Abund    | Ion/Isotope            | Tgt Mass Error (ppm) |
|----------|--------|----------|------------------------|----------------------|
| 447.2389 | 1      | 37493.01 | (M+H)+                 | 0.31                 |
| 448.2419 | 1      | 9841.59  | (M+H)+                 | 0.64                 |
| 449.2446 | 1      | 1650.6   | (M+H)+                 | 0.86                 |
| 450.2459 | 1      | 220.41   | (M+H)+                 | 4.07                 |
| 469.2232 | 1      | 100.21   | (M+Na)+                | -4.68                |
| 910.4793 | 1      | 72.39    | (2M+NH <sub>4</sub> )+ | 19.88                |
| 911.4782 | 1      | 59.38    | (2M+NH <sub>4</sub> )+ | 24.42                |
| 915.4298 | 1      | 279.26   | (2M+Na)+               | 25.07                |
| 916.4382 | 1      | 141.54   | (2M+Na)+               | 19.27                |
| 917.4322 | 1      | 75.55    | (2M+Na)+               | 29.05                |

--- End Of Report ---



# Target Compound Screening Report

|                                 |                                        |                               |                                                     |
|---------------------------------|----------------------------------------|-------------------------------|-----------------------------------------------------|
| <b>Data File</b>                | 23.d                                   | <b>Sample Name</b>            | H2977003                                            |
| <b>Sample Type</b>              | Sample                                 | <b>Position</b>               | P1-C5                                               |
| <b>Instrument Name</b>          | Instrument 1                           | <b>User Name</b>              | Denis V.Bylina                                      |
| <b>Acq Method</b>               | Fast_Gradient_HRMS_pos_Lock_08272019.m | <b>Acquired Time</b>          | 9/23/2021 1:18:48 PM (UTC+03:00)                    |
| <b>IRM Calibration Status</b>   | Success                                | <b>DA Method</b>              | 1.m                                                 |
| <b>Comment</b>                  |                                        |                               |                                                     |
| <b>Sample Group</b>             |                                        | <b>Info.</b>                  | Agilent 6224 TOF LC/MS                              |
| <b>MFC</b>                      | C25H28N4O3                             | <b>Stream Name</b>            | LC 1                                                |
| <b>Acquisition Time (Local)</b> | 9/23/2021 1:18:48 PM (UTC+03:00)       | <b>Acquisition SW Version</b> | 6200 series TOF/6500 series Q-TOF B.08.00 (B8058.0) |
| <b>TOF Driver Version</b>       | 8.00.00                                | <b>TOF Firmware Version</b>   | 8.643                                               |
| <b>Tune Mass Range Max.</b>     | 1700                                   |                               |                                                     |

## Compound Table

| Label                       | Tgt Score | Mass Error (ppm) | Tgt Formula   | Obs. RT | Ref. Mass | Obs. Mass |
|-----------------------------|-----------|------------------|---------------|---------|-----------|-----------|
| Cpd 1: C25 H28 N4 O3; 2.943 | 97.28     | -0.8             | C25 H28 N4 O3 | 2.943   | 432.2161  | 432.2158  |

| Obs. m/z | Obs. RT | Obs. Mass | Tgt Formula   | Tgt Mass | Tgt Mass Error (ppm) | RT Diff.        | Find Cps Algorithm |
|----------|---------|-----------|---------------|----------|----------------------|-----------------|--------------------|
| 433.2233 | 2.943   | 432.2158  | C25 H28 N4 O3 | 432.2161 | -0.8                 | Find By Formula |                    |

## Compound Chromatograms

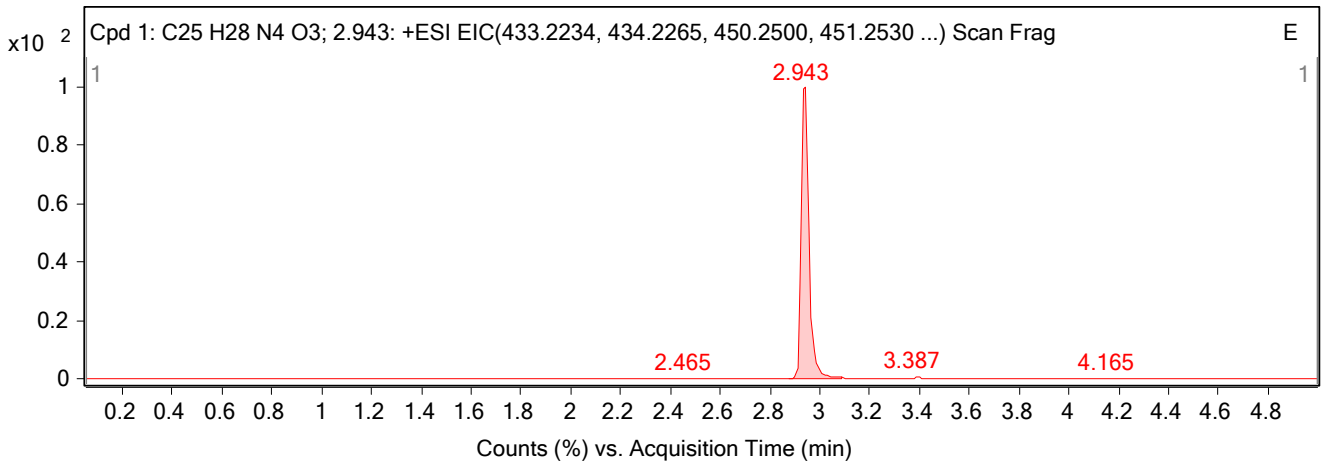

MS Zoomed Spectrum

# Target Compound Screening Report

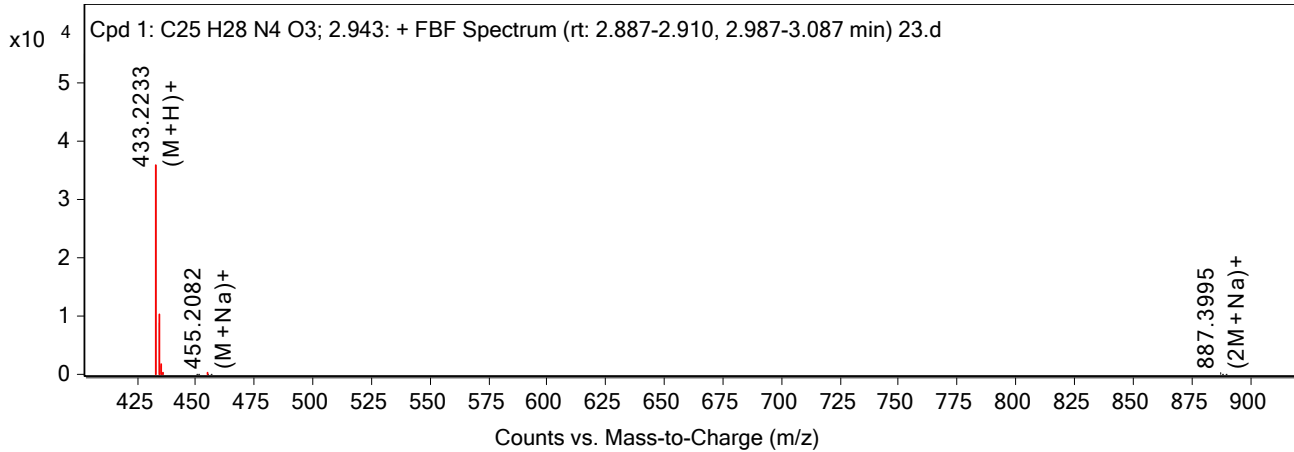

## MS Spectrum Peak List

| Obs. m/z | Charge | Abund    | Ion/Isotope           |
|----------|--------|----------|-----------------------|
| 433.2233 | 1      | 35905.52 | (M+H)+                |
| 434.226  | 1      | 8955.73  | (M+H)+                |
| 435.2296 | 1      | 1381.28  | (M+H)+                |
| 436.2346 | 1      | 173.45   | (M+H)+                |
| 450.2425 | 1      | 84.85    | (M+NH <sub>4</sub> )+ |
| 455.2082 | 1      | 160.31   | (M+Na)+               |
| 456.2073 | 1      | 66.24    | (M+Na)+               |
| 887.3995 | 1      | 209.48   | (2M+Na)+              |
| 888.4008 | 1      | 121.57   | (2M+Na)+              |
| 889.3989 | 1      | 57.07    | (2M+Na)+              |

## MS Zoomed Spectrum

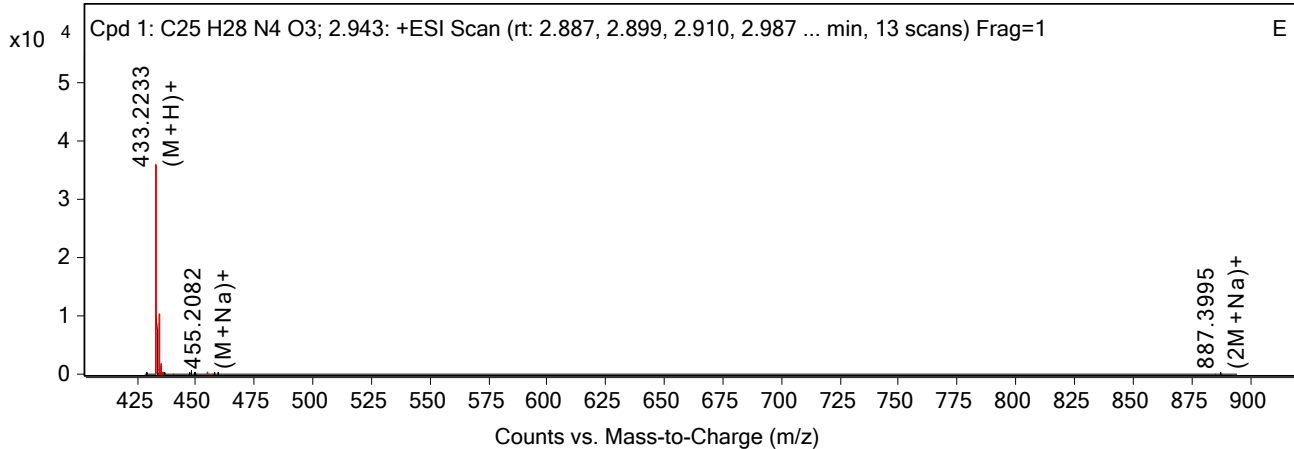

## MS Spectrum Peak List

| Obs. m/z | Charge | Abund    | Ion/Isotope           | Tgt Mass Error (ppm) |
|----------|--------|----------|-----------------------|----------------------|
| 433.2233 | 1      | 35905.52 | (M+H)+                | 0.2                  |
| 434.226  | 1      | 8955.73  | (M+H)+                | 1.03                 |
| 435.2296 | 1      | 1381.28  | (M+H)+                | -0.73                |
| 436.2346 | 1      | 173.45   | (M+H)+                | -5.97                |
| 450.2425 | 1      | 84.85    | (M+NH <sub>4</sub> )+ | 16.5                 |
| 455.2082 | 1      | 160.31   | (M+Na)+               | -6.24                |
| 456.2073 | 1      | 66.24    | (M+Na)+               | 2.58                 |
| 887.3995 | 1      | 209.48   | (2M+Na)+              | 24.75                |
| 888.4008 | 1      | 121.57   | (2M+Na)+              | 26.76                |
| 889.3989 | 1      | 57.07    | (2M+Na)+              | 32.17                |

--- End Of Report ---

# Target Compound Screening Report

|                                 |                                        |                               |                                                     |
|---------------------------------|----------------------------------------|-------------------------------|-----------------------------------------------------|
| <b>Data File</b>                | 12.d                                   | <b>Sample Name</b>            | H3468887                                            |
| <b>Sample Type</b>              | Sample                                 | <b>Position</b>               | P1-B3                                               |
| <b>Instrument Name</b>          | Instrument 1                           | <b>User Name</b>              | Denis V.Bylina                                      |
| <b>Acq Method</b>               | Fast_Gradient_HRMS_pos_Lock_08272019.m | <b>Acquired Time</b>          | 10/5/2021 6:40:51 PM (UTC+03:00)                    |
| <b>IRM Calibration Status</b>   | Success                                | <b>DA Method</b>              | 1.m                                                 |
| <b>Comment</b>                  |                                        |                               |                                                     |
| <b>Sample Group</b>             |                                        | <b>Info.</b>                  | Agilent 6224 TOF LC/MS                              |
| <b>MFC</b>                      | C20H23N3O2                             | <b>Stream Name</b>            | LC 1                                                |
| <b>Acquisition Time (Local)</b> | 10/5/2021 6:40:51 PM (UTC+03:00)       | <b>Acquisition SW Version</b> | 6200 series TOF/6500 series Q-TOF B.08.00 (B8058.0) |
| <b>TOF Driver Version</b>       | 8.00.00                                | <b>TOF Firmware Version</b>   | 8.643                                               |
| <b>Tune Mass Range Max.</b>     | 1700                                   |                               |                                                     |

## Compound Table

| Label                       | Tgt Score | Mass Error (ppm) | Tgt Formula   | Obs. RT | Ref. Mass | Obs. Mass |
|-----------------------------|-----------|------------------|---------------|---------|-----------|-----------|
| Cpd 1: C20 H23 N3 O2; 2.127 | 95.79     | -1.59            | C20 H23 N3 O2 | 2.127   | 337.179   | 337.1785  |

| Obs. m/z | Obs. RT | Obs. Mass | Tgt Formula   | Tgt Mass | Tgt Mass Error (ppm) | RT Diff.        | Find Cpd Algorithm |
|----------|---------|-----------|---------------|----------|----------------------|-----------------|--------------------|
| 338.1858 | 2.127   | 337.1785  | C20 H23 N3 O2 | 337.179  | -1.59                | Find By Formula |                    |

## Compound Chromatograms

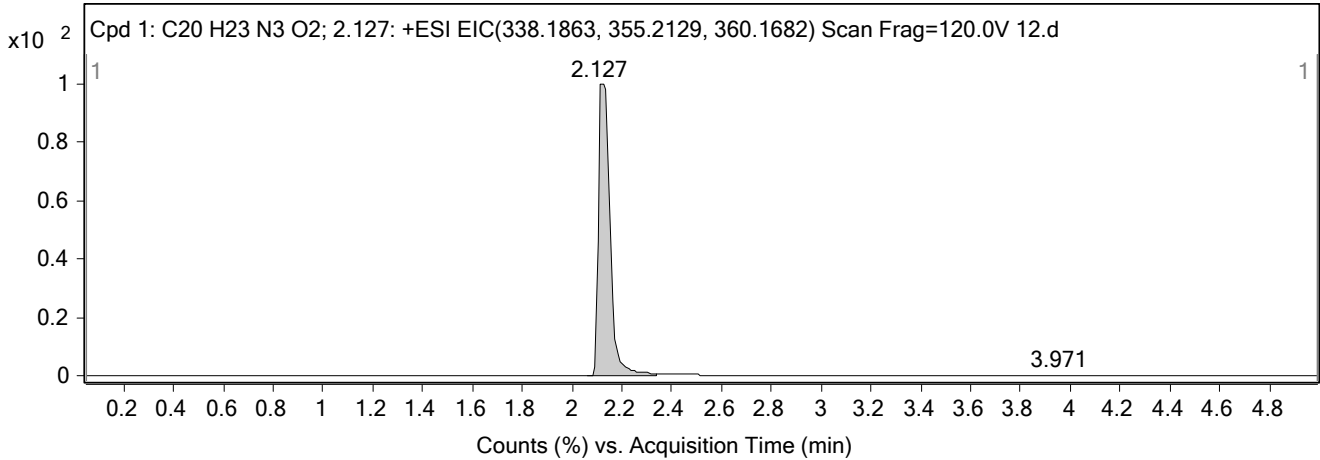

MS Zoomed Spectrum

# Target Compound Screening Report

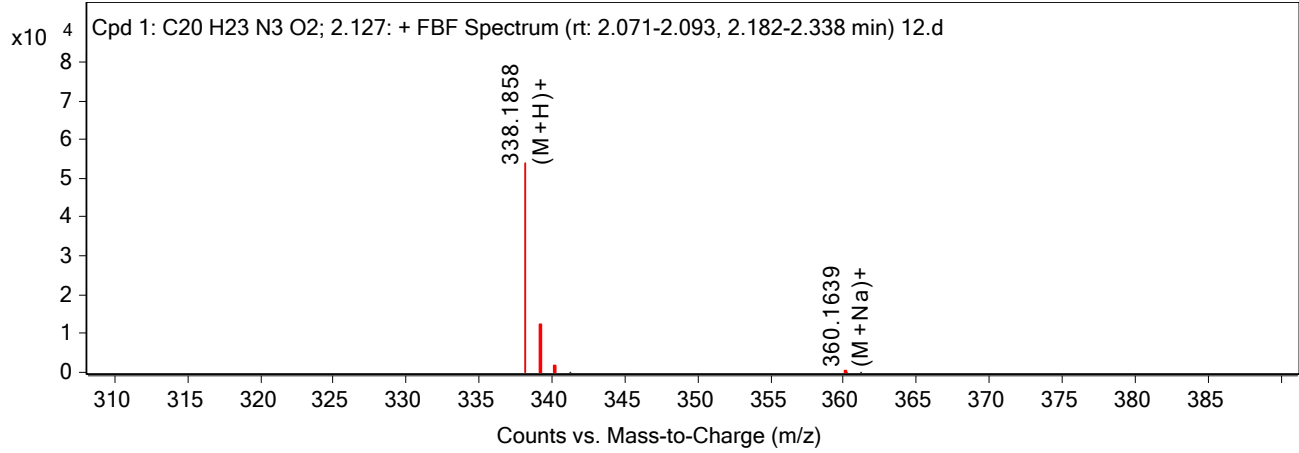

## MS Spectrum Peak List

| Obs. m/z | Charge | Abund    | Ion/Isotope |
|----------|--------|----------|-------------|
| 338.1858 | 1      | 53812.58 | (M+H)+      |
| 339.1888 | 1      | 10257.24 | (M+H)+      |
| 340.1927 | 1      | 1356.2   | (M+H)+      |
| 341.195  | 1      | 171.49   | (M+H)+      |
| 360.1639 | 1      | 224.11   | (M+Na)+     |
| 361.1625 | 1      | 81.62    | (M+Na)+     |

## MS Zoomed Spectrum

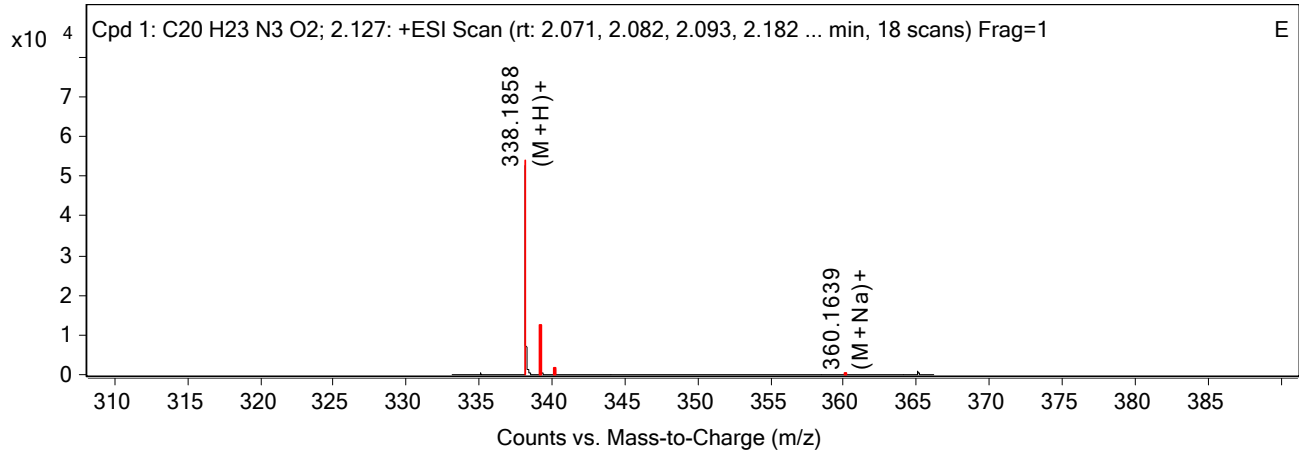

## MS Spectrum Peak List

| Obs. m/z | Charge | Abund    | Ion/Isotope | Tgt Mass Error (ppm) |
|----------|--------|----------|-------------|----------------------|
| 338.1858 | 1      | 53812.58 | (M+H)+      | 1.55                 |
| 339.1888 | 1      | 10257.24 | (M+H)+      | 1.74                 |
| 340.1927 | 1      | 1356.2   | (M+H)+      | -1.44                |
| 341.195  | 1      | 171.49   | (M+H)+      | -0.4                 |
| 360.1639 | 1      | 224.11   | (M+Na)+     | 12.06                |
| 361.1625 | 1      | 81.62    | (M+Na)+     | 24.49                |

--- End Of Report ---

## Target Compound Screening Report

|                                 |                                        |                               |                                                     |
|---------------------------------|----------------------------------------|-------------------------------|-----------------------------------------------------|
| <b>Data File</b>                | 27.d                                   | <b>Sample Name</b>            | H1657372                                            |
| <b>Sample Type</b>              | Sample                                 | <b>Position</b>               | P1-C9                                               |
| <b>Instrument Name</b>          | Instrument 1                           | <b>User Name</b>              | Denis V.Bylina                                      |
| <b>Acq Method</b>               | Fast_Gradient_HRMS_pos_Lock_08272019.m | <b>Acquired Time</b>          | 9/23/2021 1:41:04 PM (UTC+03:00)                    |
| <b>IRM Calibration Status</b>   | Success                                | <b>DA Method</b>              | 1.m                                                 |
| <b>Comment</b>                  |                                        |                               |                                                     |
| <b>Sample Group</b>             |                                        | <b>Info.</b>                  | Agilent 6224 TOF LC/MS                              |
| <b>MFC</b>                      | C24H28N2O3                             | <b>Stream Name</b>            | LC 1                                                |
| <b>Acquisition Time (Local)</b> | 9/23/2021 1:41:04 PM (UTC+03:00)       | <b>Acquisition SW Version</b> | 6200 series TOF/6500 series Q-TOF B.08.00 (B8058.0) |
| <b>TOF Driver Version</b>       | 8.00.00                                | <b>TOF Firmware Version</b>   | 8.643                                               |
| <b>Tune Mass Range Max.</b>     | 1700                                   |                               |                                                     |

### Compound Table

| Label                       | Tgt Score | Mass Error (ppm) | Tgt Formula   | Obs. RT | Ref. Mass | Obs. Mass |
|-----------------------------|-----------|------------------|---------------|---------|-----------|-----------|
| Cpd 1: C24 H28 N2 O3; 3.044 | 96.35     | -0.23            | C24 H28 N2 O3 | 3.044   | 392.21    | 392.2099  |

| Obs. m/z | Obs. RT | Obs. Mass | Tgt Formula   | Tgt Mass | Tgt Mass Error (ppm) | RT Diff.        | Find Cpds Algorithm |
|----------|---------|-----------|---------------|----------|----------------------|-----------------|---------------------|
| 393.2171 | 3.044   | 392.2099  | C24 H28 N2 O3 | 392.21   | -0.23                | Find By Formula |                     |

### Compound Chromatograms

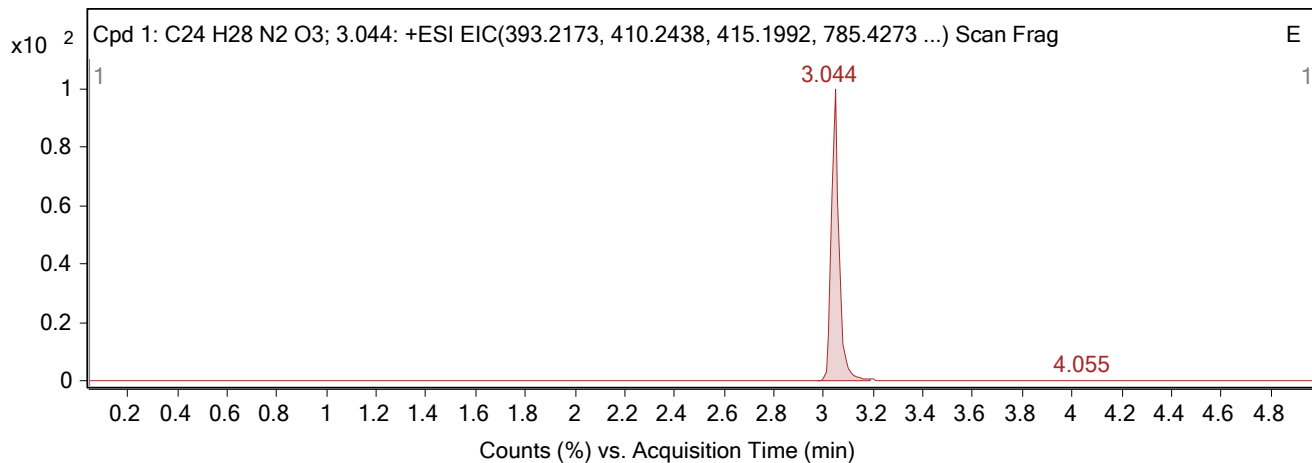

MS Zoomed Spectrum

# Target Compound Screening Report

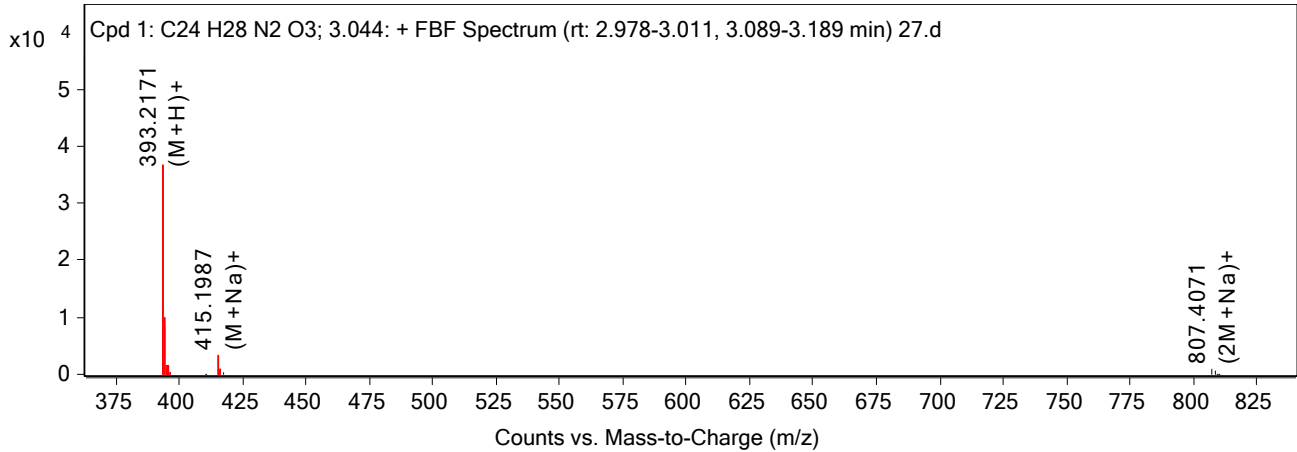

## MS Spectrum Peak List

| Obs. m/z | Charge | Abund    | Ion/Isotope |
|----------|--------|----------|-------------|
| 393.2171 | 1      | 36613.93 | (M+H)+      |
| 394.2206 | 1      | 8316.89  | (M+H)+      |
| 395.2251 | 1      | 1384.62  | (M+H)+      |
| 396.2279 | 1      | 185.92   | (M+H)+      |
| 415.1987 | 1      | 3364.81  | (M+Na)+     |
| 416.2019 | 1      | 863.39   | (M+Na)+     |
| 417.2159 | 1      | 198.55   | (M+Na)+     |
| 807.4071 | 1      | 994.68   | (2M+Na)+    |
| 808.4094 | 1      | 523.7    | (2M+Na)+    |
| 809.4151 | 1      | 165.51   | (2M+Na)+    |

## MS Zoomed Spectrum

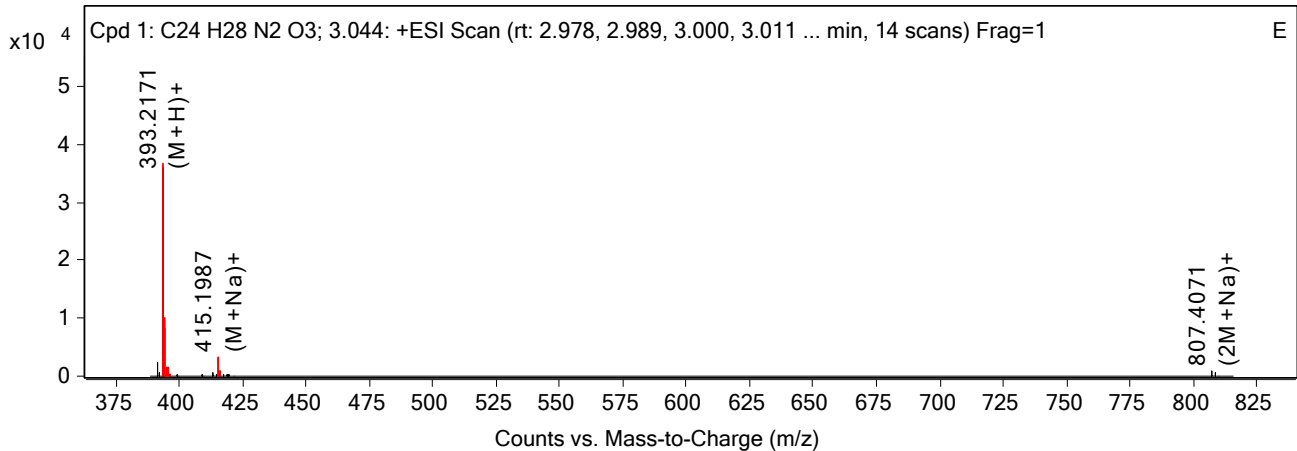

## MS Spectrum Peak List

| Obs. m/z | Charge | Abund    | Ion/Isotope | Tgt Mass Error (ppm) |
|----------|--------|----------|-------------|----------------------|
| 393.2171 | 1      | 36613.93 | (M+H)+      | 0.32                 |
| 394.2206 | 1      | 8316.89  | (M+H)+      | -0.28                |
| 395.2251 | 1      | 1384.62  | (M+H)+      | -4.31                |
| 396.2279 | 1      | 185.92   | (M+H)+      | -4.36                |
| 415.1987 | 1      | 3364.81  | (M+Na)+     | 1.24                 |
| 416.2019 | 1      | 863.39   | (M+Na)+     | 1.19                 |
| 417.2159 | 1      | 198.55   | (M+Na)+     | -25.38               |
| 807.4071 | 1      | 994.68   | (2M+Na)+    | 2.58                 |
| 808.4094 | 1      | 523.7    | (2M+Na)+    | 3.76                 |
| 809.4151 | 1      | 165.51   | (2M+Na)+    | 0.42                 |

--- End Of Report ---

# Target Compound Screening Report

|                                 |                                        |                               |                                                     |
|---------------------------------|----------------------------------------|-------------------------------|-----------------------------------------------------|
| <b>Data File</b>                | 36.d                                   | <b>Sample Name</b>            | H3003309                                            |
| <b>Sample Type</b>              | Sample                                 | <b>Position</b>               | P1-D9                                               |
| <b>Instrument Name</b>          | Instrument 1                           | <b>User Name</b>              | Denis V.Bylina                                      |
| <b>Acq Method</b>               | Fast_Gradient_HRMS_pos_Lock_08272019.m | <b>Acquired Time</b>          | 9/23/2021 2:31:04 PM (UTC+03:00)                    |
| <b>IRM Calibration Status</b>   | Success                                | <b>DA Method</b>              | 1.m                                                 |
| <b>Comment</b>                  |                                        |                               |                                                     |
| <b>Sample Group</b>             |                                        | <b>Info.</b>                  | Agilent 6224 TOF LC/MS                              |
| <b>MFC</b>                      | C19H32N4O2                             | <b>Stream Name</b>            | LC 1                                                |
| <b>Acquisition Time (Local)</b> | 9/23/2021 2:31:04 PM (UTC+03:00)       | <b>Acquisition SW Version</b> | 6200 series TOF/6500 series Q-TOF B.08.00 (B8058.0) |
| <b>TOF Driver Version</b>       | 8.00.00                                | <b>TOF Firmware Version</b>   | 8.643                                               |
| <b>Tune Mass Range Max.</b>     | 1700                                   |                               |                                                     |

## Compound Table

| Label                       | Tgt Score | Mass Error (ppm) | Tgt Formula   | Obs. RT | Ref. Mass | Obs. Mass |
|-----------------------------|-----------|------------------|---------------|---------|-----------|-----------|
| Cpd 1: C19 H32 N4 O2; 2.062 | 97.34     | 1.1              | C19 H32 N4 O2 | 2.062   | 348.2525  | 348.2529  |

| Obs. m/z | Obs. RT | Obs. Mass | Tgt Formula   | Tgt Mass | Tgt Mass Error (ppm) | RT Diff.        | Find Cps Algorithm |
|----------|---------|-----------|---------------|----------|----------------------|-----------------|--------------------|
| 349.2599 | 2.062   | 348.2529  | C19 H32 N4 O2 | 348.2525 | 1.1                  | Find By Formula |                    |

## Compound Chromatograms

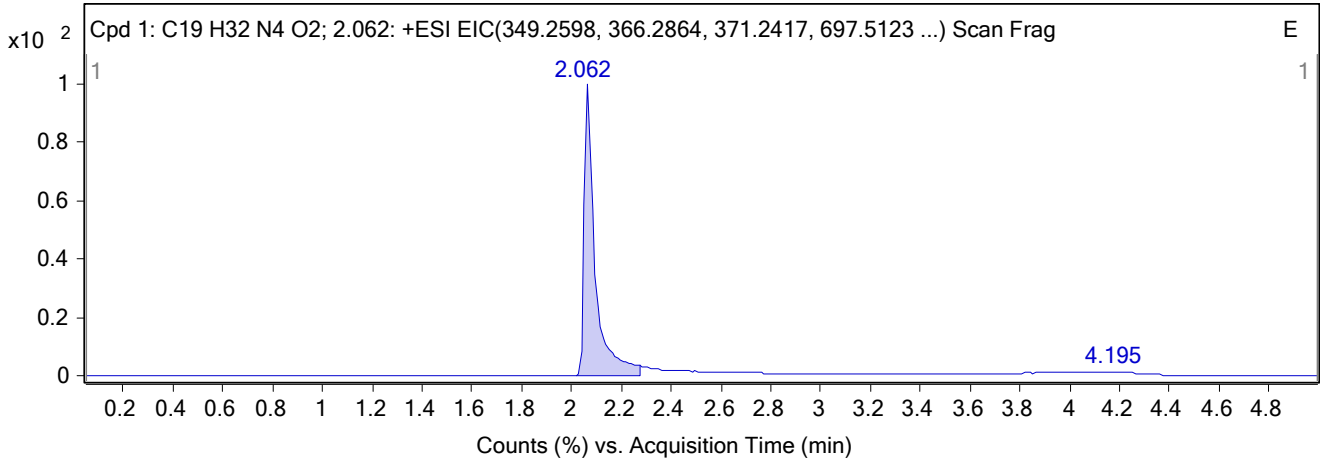

MS Zoomed Spectrum

# Target Compound Screening Report

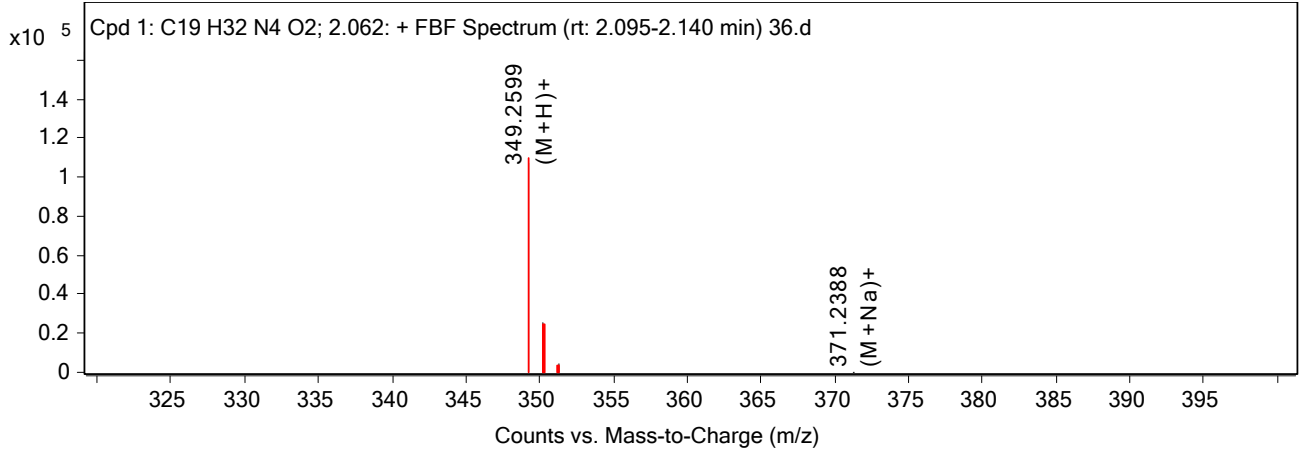

## MS Spectrum Peak List

| Obs. m/z | Charge | Abund     | Ion/Isotope |
|----------|--------|-----------|-------------|
| 349.2599 | 1      | 106952.05 | (M+H)+      |
| 350.2638 | 1      | 25956.21  | (M+H)+      |
| 351.2692 | 1      | 4830.54   | (M+H)+      |
| 371.2388 | 1      | 81.6      | (M+Na)+     |

## MS Zoomed Spectrum

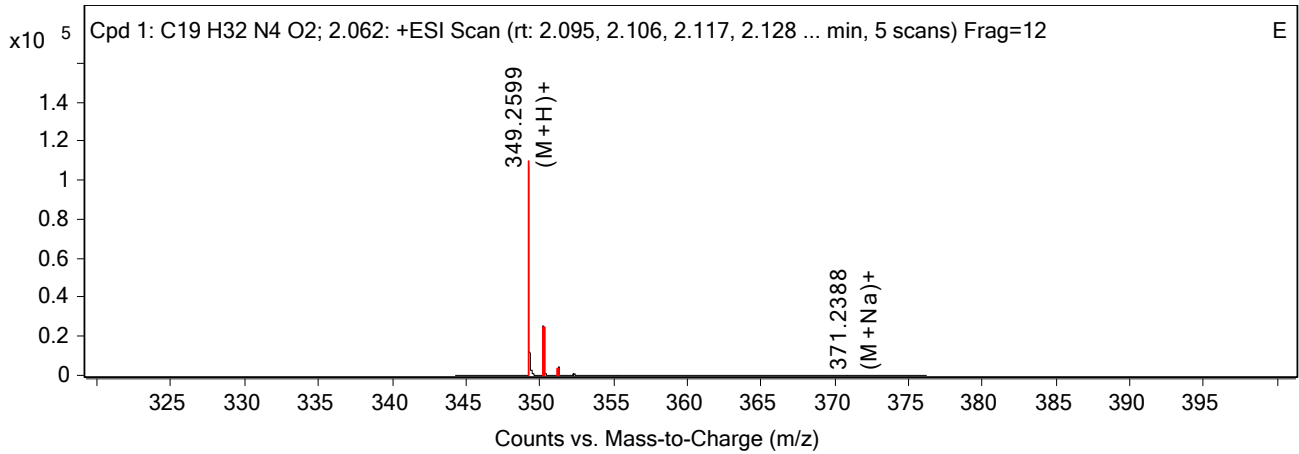

## MS Spectrum Peak List

| Obs. m/z | Charge | Abund     | Ion/Isotope | Tgt Mass Error (ppm) |
|----------|--------|-----------|-------------|----------------------|
| 349.2599 | 1      | 106952.06 | (M+H)+      | -0.29                |
| 350.2638 | 1      | 25956.21  | (M+H)+      | -2.72                |
| 351.2692 | 1      | 4830.54   | (M+H)+      | -10.44               |
| 371.2388 | 1      | 81.6      | (M+Na)+     | 8.07                 |

--- End Of Report ---



# Target Compound Screening Report

|                                 |                                        |                               |                                                     |
|---------------------------------|----------------------------------------|-------------------------------|-----------------------------------------------------|
| <b>Data File</b>                | 45.d                                   | <b>Sample Name</b>            | P212016\$3                                          |
| <b>Sample Type</b>              | Sample                                 | <b>Position</b>               | P1-E9                                               |
| <b>Instrument Name</b>          | Instrument 1                           | <b>User Name</b>              | Denis V.Bylina                                      |
| <b>Acq Method</b>               | Fast_Gradient_HRMS_pos_Lock_08272019.m | <b>Acquired Time</b>          | 9/23/2021 10:57:35 PM (UTC+03:00)                   |
| <b>IRM Calibration Status</b>   | Success                                | <b>DA Method</b>              | 1.m                                                 |
| <b>Comment</b>                  |                                        |                               |                                                     |
| <b>Sample Group</b>             |                                        | <b>Info.</b>                  | Agilent 6224 TOF LC/MS                              |
| <b>MFC</b>                      | C22H31N5O4S                            | <b>Stream Name</b>            | LC 1                                                |
| <b>Acquisition Time (Local)</b> | 9/23/2021 10:57:35 PM (UTC+03:00)      | <b>Acquisition SW Version</b> | 6200 series TOF/6500 series Q-TOF B.08.00 (B8058.0) |
| <b>TOF Driver Version</b>       | 8.00.00                                | <b>TOF Firmware Version</b>   | 8.643                                               |
| <b>Tune Mass Range Max.</b>     | 1700                                   |                               |                                                     |

## Compound Table

| Label                         | Tgt Score | Mass Error (ppm) | Tgt Formula     | Obs. RT | Ref. Mass | Obs. Mass |
|-------------------------------|-----------|------------------|-----------------|---------|-----------|-----------|
| Cpd 1: C22 H31 N5 O4 S; 2.876 | 98.54     | -2.19            | C22 H31 N5 O4 S | 2.876   | 461.2097  | 461.2087  |

| Obs. m/z | Obs. RT | Obs. Mass | Tgt Formula     | Tgt Mass | Tgt Mass Error (ppm) | RT Diff.        | Find Cpds Algorithm |
|----------|---------|-----------|-----------------|----------|----------------------|-----------------|---------------------|
| 484.1984 | 2.876   | 461.2087  | C22 H31 N5 O4 S | 461.2097 | -2.19                | Find By Formula |                     |

## Compound Chromatograms

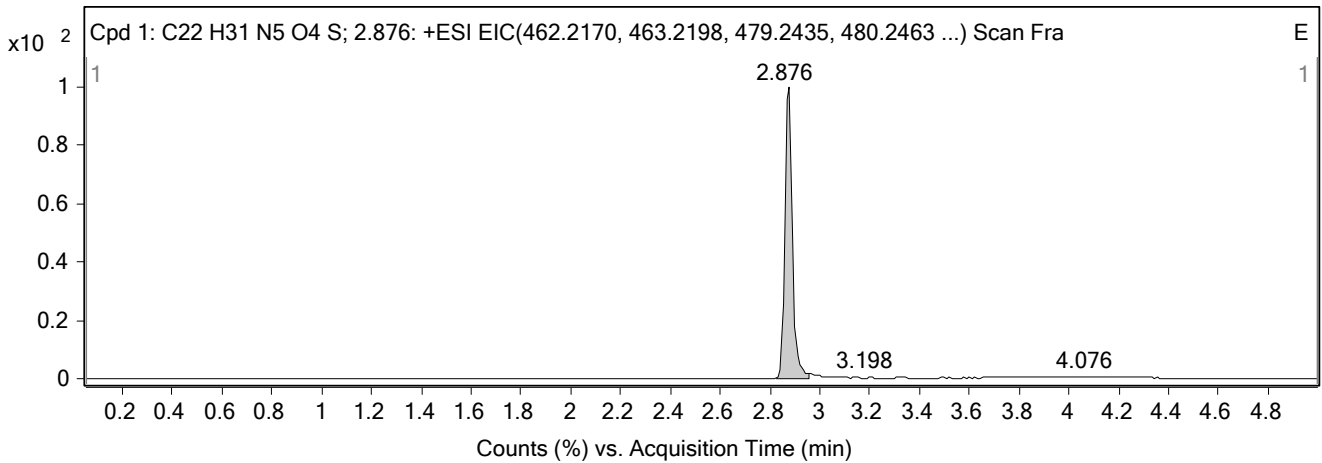

## MS Zoomed Spectrum

# Target Compound Screening Report

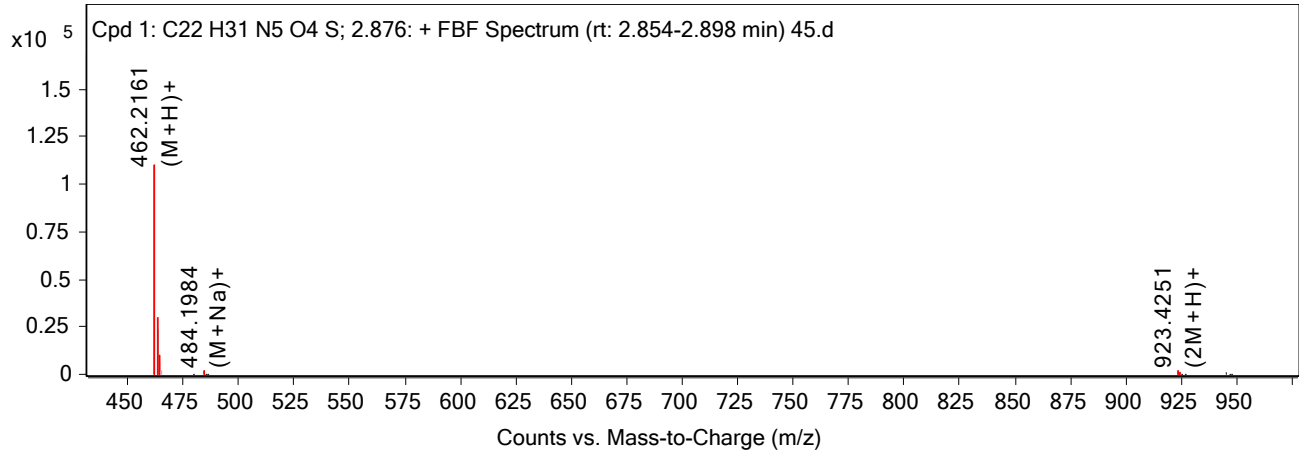

### MS Spectrum Peak List

| Obs. m/z | Charge | Abund     | Ion/Isotope |
|----------|--------|-----------|-------------|
| 462.2161 | 1      | 109836.17 | (M+H)+      |
| 463.2184 | 1      | 23548.04  | (M+H)+      |
| 464.2164 | 1      | 6614.05   | (M+H)+      |
| 484.1984 | 1      | 1576.03   | (M+Na)+     |
| 485.2013 | 1      | 428.61    | (M+Na)+     |
| 923.4251 | 1      | 1474.52   | (2M+H)+     |
| 924.4266 | 1      | 809.8     | (2M+H)+     |
| 925.4284 | 1      | 386.22    | (2M+H)+     |
| 945.4049 | 1      | 611.88    | (2M+Na)+    |
| 946.4081 | 1      | 349.49    | (2M+Na)+    |

### MS Zoomed Spectrum

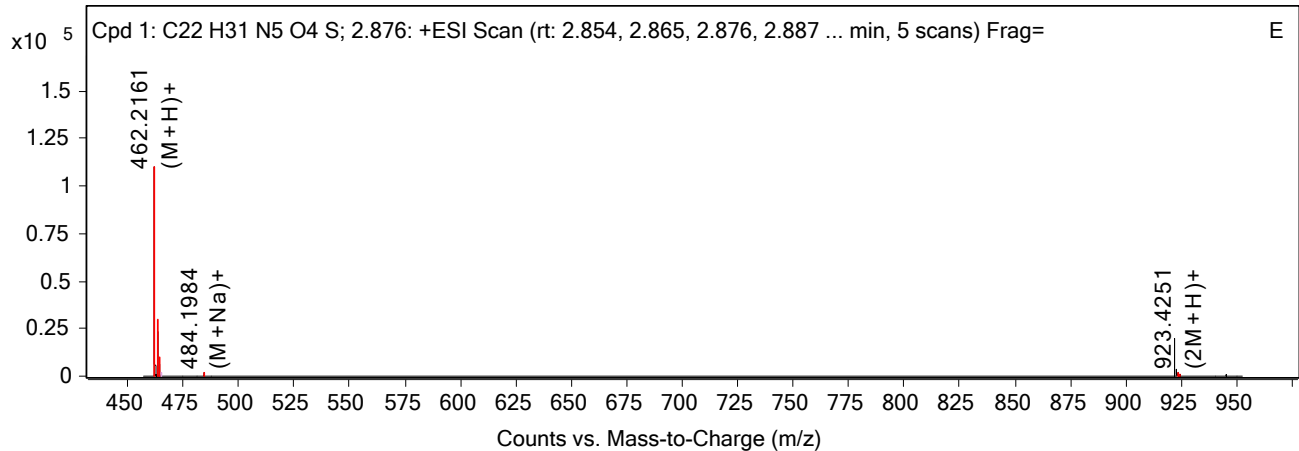

### MS Spectrum Peak List

| Obs. m/z | Charge | Abund     | Ion/Isotope | Tgt Mass Error (ppm) |
|----------|--------|-----------|-------------|----------------------|
| 462.2161 | 1      | 109836.17 | (M+H)+      | 1.9                  |
| 463.2184 | 1      | 23548.04  | (M+H)+      | 2.99                 |
| 464.2164 | 1      | 6614.05   | (M+H)+      | 2.32                 |
| 484.1984 | 1      | 1576.03   | (M+Na)+     | 1.12                 |
| 485.2013 | 1      | 428.61    | (M+Na)+     | 1.03                 |
| 923.4251 | 1      | 1474.52   | (2M+H)+     | 1.63                 |
| 924.4266 | 1      | 809.8     | (2M+H)+     | 3.14                 |
| 925.4284 | 1      | 386.22    | (2M+H)+     | 0.29                 |
| 945.4049 | 1      | 611.88    | (2M+Na)+    | 3.84                 |
| 946.4081 | 1      | 349.49    | (2M+Na)+    | 3.5                  |

--- End Of Report ---

# Target Compound Screening Report

|                                 |                                        |                               |                                                     |
|---------------------------------|----------------------------------------|-------------------------------|-----------------------------------------------------|
| <b>Data File</b>                | 47.d                                   | <b>Sample Name</b>            | p212021\$4                                          |
| <b>Sample Type</b>              | Sample                                 | <b>Position</b>               | P1-F2                                               |
| <b>Instrument Name</b>          | Instrument 1                           | <b>User Name</b>              | Denis V.Bylina                                      |
| <b>Acq Method</b>               | Fast_Gradient_HRMS_pos_Lock_08272019.m | <b>Acquired Time</b>          | 9/23/2021 11:08:37 PM (UTC+03:00)                   |
| <b>IRM Calibration Status</b>   | Success                                | <b>DA Method</b>              | 1.m                                                 |
| <b>Comment</b>                  |                                        |                               |                                                     |
| <b>Sample Group</b>             |                                        | <b>Info.</b>                  | Agilent 6224 TOF LC/MS                              |
| <b>MFC</b>                      | C24H24ClN3O3                           | <b>Stream Name</b>            | LC 1                                                |
| <b>Acquisition Time (Local)</b> | 9/23/2021 11:08:37 PM (UTC+03:00)      | <b>Acquisition SW Version</b> | 6200 series TOF/6500 series Q-TOF B.08.00 (B8058.0) |
| <b>TOF Driver Version</b>       | 8.00.00                                | <b>TOF Firmware Version</b>   | 8.643                                               |
| <b>Tune Mass Range Max.</b>     | 1700                                   |                               |                                                     |

## Compound Table

| Label                          | Tgt Score | Mass Error (ppm) | Tgt Formula      | Obs. RT | Ref. Mass | Obs. Mass |
|--------------------------------|-----------|------------------|------------------|---------|-----------|-----------|
| Cpd 1: C24 H24 Cl N3 O3; 2.802 | 98.79     | -2.19            | C24 H24 Cl N3 O3 | 2.802   | 437.1506  | 437.1497  |

| Obs. m/z | Obs. RT | Obs. Mass | Tgt Formula      | Tgt Mass | Tgt Mass Error (ppm) | RT Diff.        | Find Cpds Algorithm |
|----------|---------|-----------|------------------|----------|----------------------|-----------------|---------------------|
| 438.157  | 2.802   | 437.1497  | C24 H24 Cl N3 O3 | 437.1506 | -2.19                | Find By Formula |                     |

## Compound Chromatograms

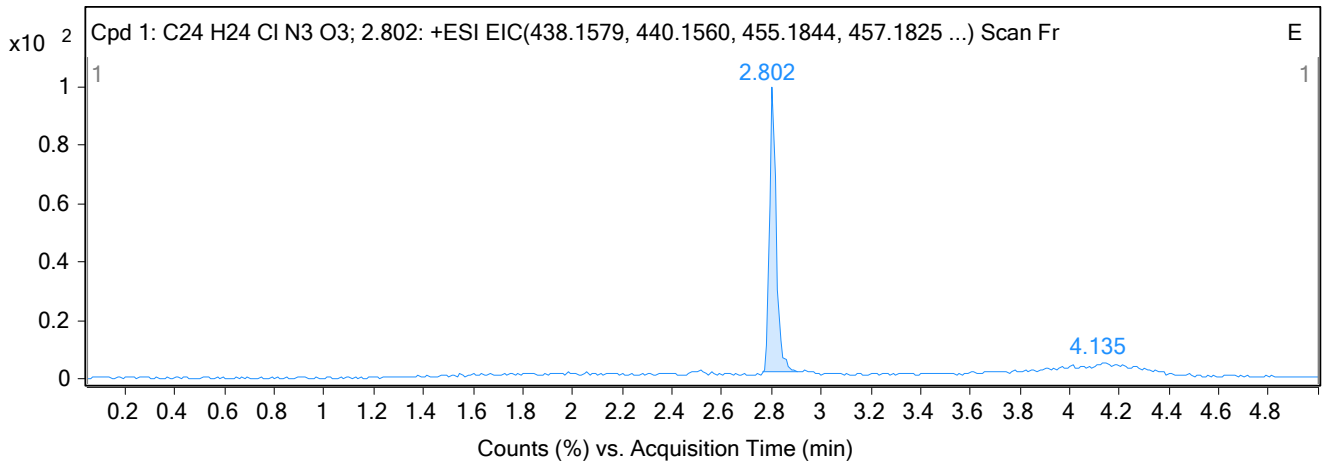

MS Zoomed Spectrum

# Target Compound Screening Report

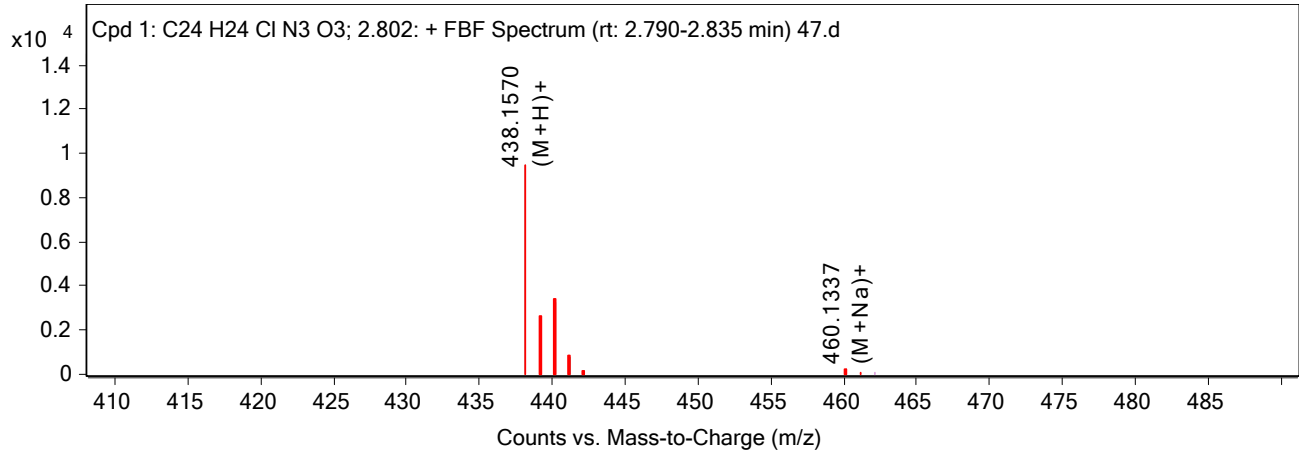

## MS Spectrum Peak List

| Obs. m/z | Charge | Abund   | Ion/Isotope |
|----------|--------|---------|-------------|
| 438.157  | 1      | 9480.1  | (M+H)+      |
| 439.1601 | 1      | 2500.31 | (M+H)+      |
| 440.1554 | 1      | 3298.95 | (M+H)+      |
| 441.1581 | 1      | 780.43  | (M+H)+      |
| 442.1594 | 1      | 178.69  | (M+H)+      |
| 460.1337 | 1      | 246.35  | (M+Na)+     |
| 461.138  | 1      | 90.97   | (M+Na)+     |

## MS Zoomed Spectrum

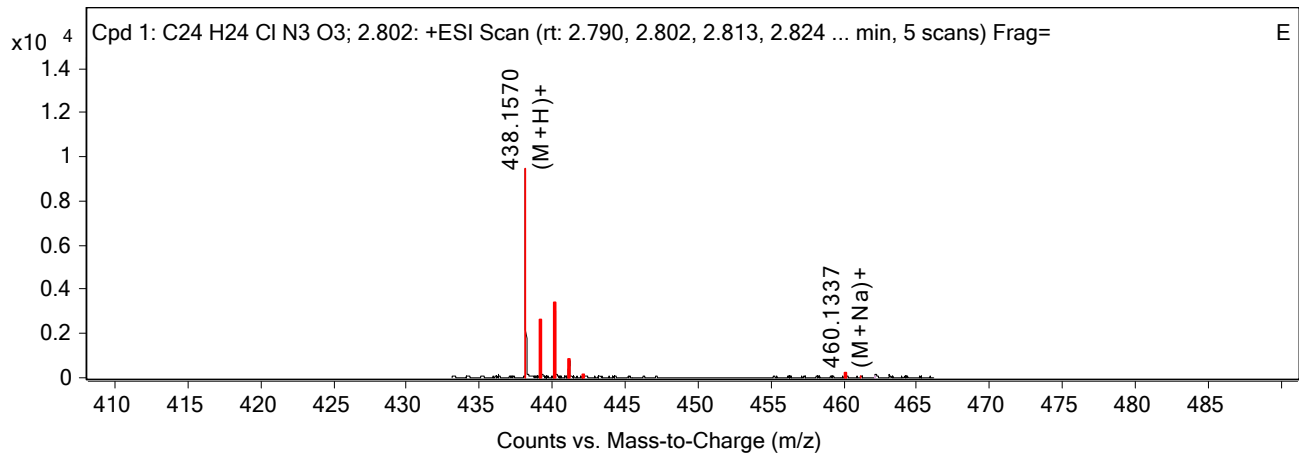

## MS Spectrum Peak List

| Obs. m/z | Charge | Abund   | Ion/Isotope | Tgt Mass Error (ppm) |
|----------|--------|---------|-------------|----------------------|
| 438.157  | 1      | 9480.1  | (M+H)+      | 2.15                 |
| 439.1601 | 1      | 2500.31 | (M+H)+      | 2.17                 |
| 440.1554 | 1      | 3298.95 | (M+H)+      | 1.33                 |
| 441.1581 | 1      | 780.43  | (M+H)+      | 0.87                 |
| 442.1594 | 1      | 178.69  | (M+H)+      | 4.02                 |
| 460.1337 | 1      | 246.35  | (M+Na)+     | 13.28                |
| 461.138  | 1      | 90.97   | (M+Na)+     | 10.7                 |

--- End Of Report ---

# Target Compound Screening Report

|                                 |                                        |                               |                                                     |
|---------------------------------|----------------------------------------|-------------------------------|-----------------------------------------------------|
| <b>Data File</b>                | 3.d                                    | <b>Sample Name</b>            | H3464500                                            |
| <b>Sample Type</b>              | Sample                                 | <b>Position</b>               | P1-A3                                               |
| <b>Instrument Name</b>          | Instrument 1                           | <b>User Name</b>              | Denis V.Bylina                                      |
| <b>Acq Method</b>               | Fast_Gradient_HRMS_pos_Lock_08272019.m | <b>Acquired Time</b>          | 10/5/2021 5:50:51 PM (UTC+03:00)                    |
| <b>IRM Calibration Status</b>   | Success                                | <b>DA Method</b>              | 1.m                                                 |
| <b>Comment</b>                  |                                        |                               |                                                     |
| <b>Sample Group</b>             |                                        | <b>Info.</b>                  | Agilent 6224 TOF LC/MS                              |
| <b>MFC</b>                      | C23H33N3O5S2                           | <b>Stream Name</b>            | LC 1                                                |
| <b>Acquisition Time (Local)</b> | 10/5/2021 5:50:51 PM (UTC+03:00)       | <b>Acquisition SW Version</b> | 6200 series TOF/6500 series Q-TOF B.08.00 (B8058.0) |
| <b>TOF Driver Version</b>       | 8.00.00                                | <b>TOF Firmware Version</b>   | 8.643                                               |
| <b>Tune Mass Range Max.</b>     | 1700                                   |                               |                                                     |

## Compound Table

| Label                          | Tgt Score | Mass Error (ppm) | Tgt Formula      | Obs. RT | Ref. Mass | Obs. Mass |
|--------------------------------|-----------|------------------|------------------|---------|-----------|-----------|
| Cpd 1: C23 H33 N3 O5 S2; 3.367 | 93.7      | -1.6             | C23 H33 N3 O5 S2 | 3.367   | 495.1862  | 495.1854  |

| Obs. m/z | Obs. RT | Obs. Mass | Tgt Formula      | Tgt Mass | Tgt Mass Error (ppm) | RT Diff.        | Find Cpds Algorithm |
|----------|---------|-----------|------------------|----------|----------------------|-----------------|---------------------|
| 496.1927 | 3.367   | 495.1854  | C23 H33 N3 O5 S2 | 495.1862 | -1.6                 | Find By Formula |                     |

## Compound Chromatograms

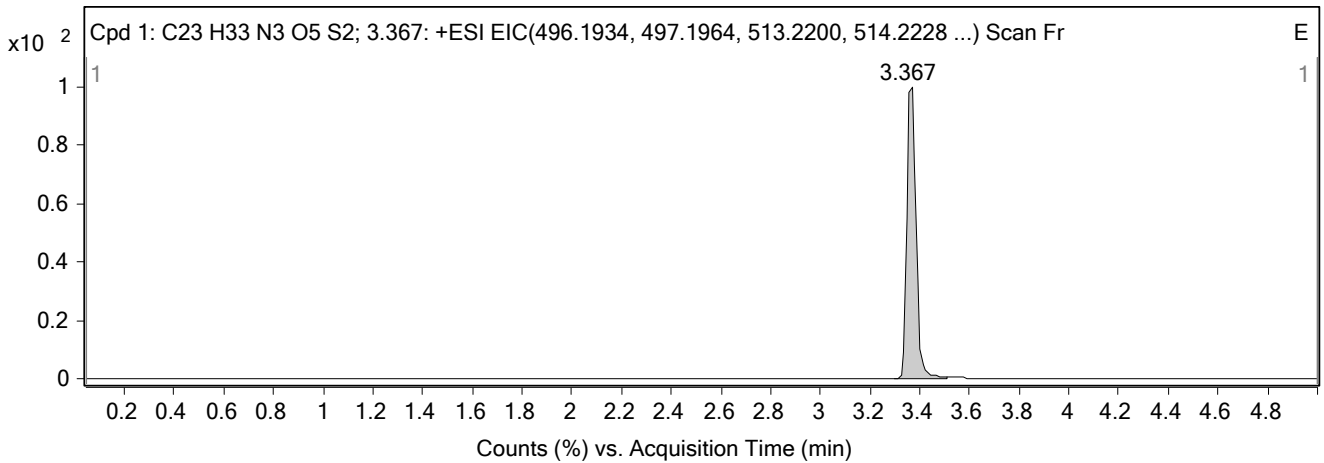

MS Zoomed Spectrum

# Target Compound Screening Report

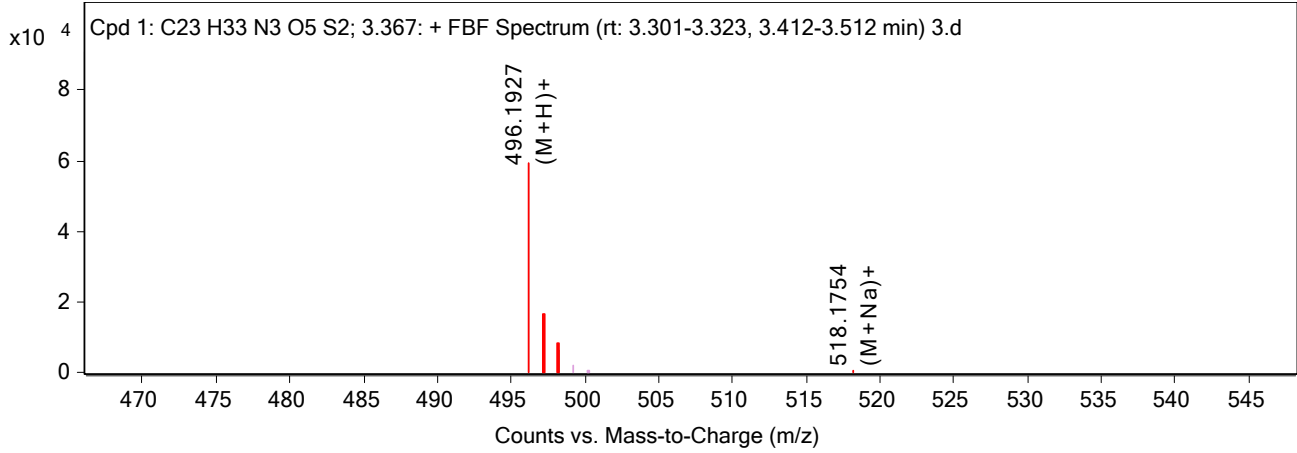

## MS Spectrum Peak List

| Obs. m/z | Charge | Abund    | Ion/Isotope |
|----------|--------|----------|-------------|
| 496.1927 | 1      | 59378.1  | (M+H)+      |
| 497.1954 | 1      | 13925.82 | (M+H)+      |
| 498.1919 | 1      | 6276.47  | (M+H)+      |
| 518.1754 | 1      | 617.86   | (M+Na)+     |

## MS Zoomed Spectrum

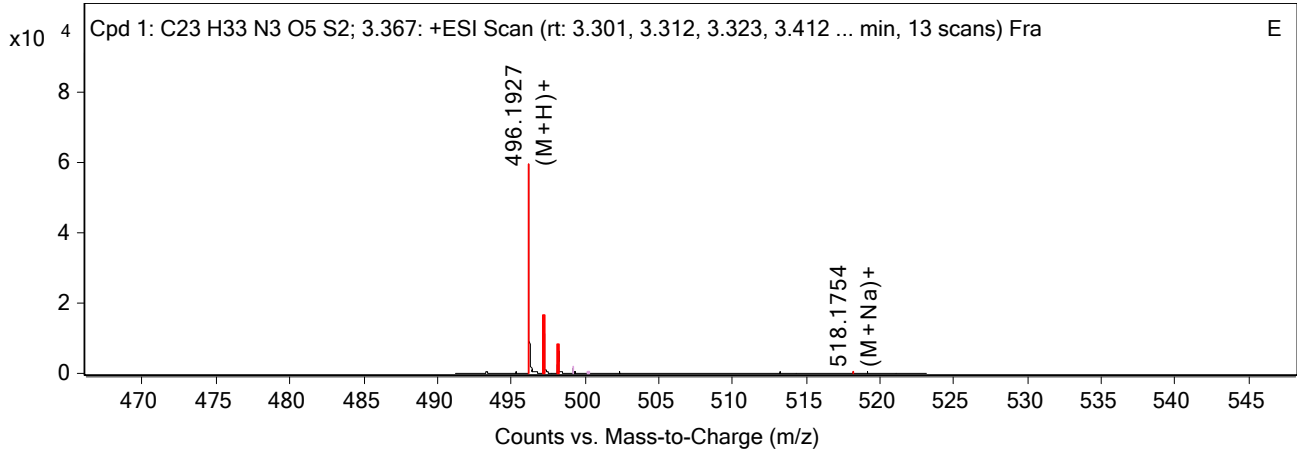

## MS Spectrum Peak List

| Obs. m/z | Charge | Abund    | Ion/Isotope | Tgt Mass Error (ppm) |
|----------|--------|----------|-------------|----------------------|
| 496.1927 | 1      | 59378.1  | (M+H)+      | 1.54                 |
| 497.1954 | 1      | 13925.82 | (M+H)+      | 1.9                  |
| 498.1919 | 1      | 6276.47  | (M+H)+      | 1.55                 |
| 518.1754 | 1      | 617.86   | (M+Na)+     | -0.08                |

--- End Of Report ---

# Target Compound Screening Report

|                                 |                                        |                               |                                                     |
|---------------------------------|----------------------------------------|-------------------------------|-----------------------------------------------------|
| <b>Data File</b>                | 31.d                                   | <b>Sample Name</b>            | H2373341                                            |
| <b>Sample Type</b>              | Sample                                 | <b>Position</b>               | P1-D4                                               |
| <b>Instrument Name</b>          | Instrument 1                           | <b>User Name</b>              | Denis V.Bylina                                      |
| <b>Acq Method</b>               | Fast_Gradient_HRMS_pos_Lock_08272019.m | <b>Acquired Time</b>          | 9/23/2021 9:40:08 PM (UTC+03:00)                    |
| <b>IRM Calibration Status</b>   | Success                                | <b>DA Method</b>              | 1.m                                                 |
| <b>Comment</b>                  |                                        |                               |                                                     |
| <b>Sample Group</b>             |                                        | <b>Info.</b>                  | Agilent 6224 TOF LC/MS                              |
| <b>MFC</b>                      | C23H33N5O3S                            | <b>Stream Name</b>            | LC 1                                                |
| <b>Acquisition Time (Local)</b> | 9/23/2021 9:40:08 PM (UTC+03:00)       | <b>Acquisition SW Version</b> | 6200 series TOF/6500 series Q-TOF B.08.00 (B8058.0) |
| <b>TOF Driver Version</b>       | 8.00.00                                | <b>TOF Firmware Version</b>   | 8.643                                               |
| <b>Tune Mass Range Max.</b>     | 1700                                   |                               |                                                     |

## Compound Table

| Label                         | Tgt Score | Mass Error (ppm) | Tgt Formula     | Obs. RT | Ref. Mass | Obs. Mass |
|-------------------------------|-----------|------------------|-----------------|---------|-----------|-----------|
| Cpd 1: C23 H33 N5 O3 S; 3.047 | 94.69     | -2.05            | C23 H33 N5 O3 S | 3.047   | 459.2304  | 459.2295  |

| Obs. m/z | Obs. RT | Obs. Mass | Tgt Formula     | Tgt Mass | Tgt Mass Error (ppm) | RT Diff.        | Find Cpds Algorithm |
|----------|---------|-----------|-----------------|----------|----------------------|-----------------|---------------------|
| 460.2368 | 3.047   | 459.2295  | C23 H33 N5 O3 S | 459.2304 | -2.05                | Find By Formula |                     |

## Compound Chromatograms

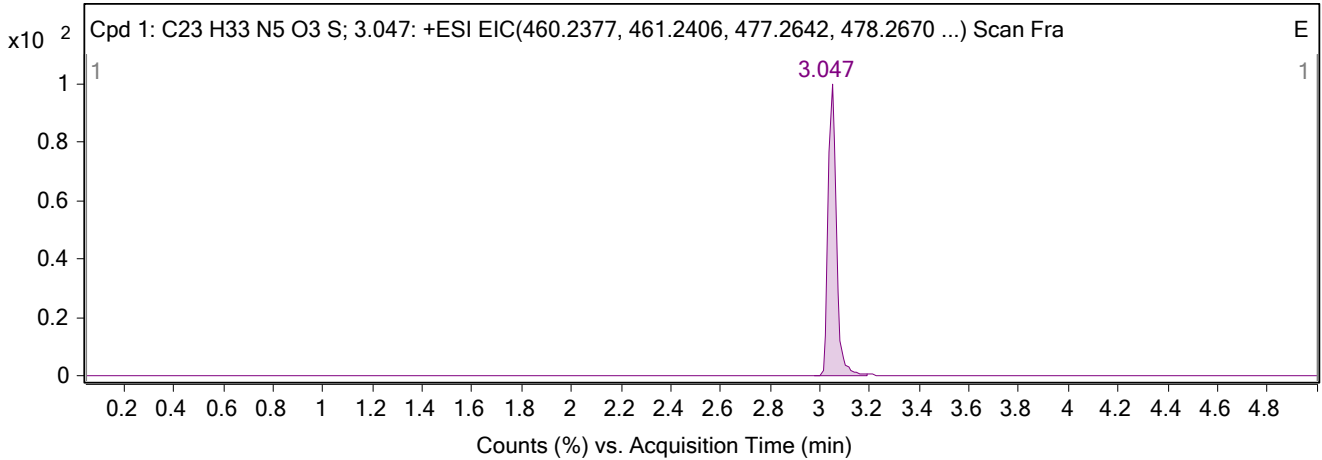

MS Zoomed Spectrum

# Target Compound Screening Report

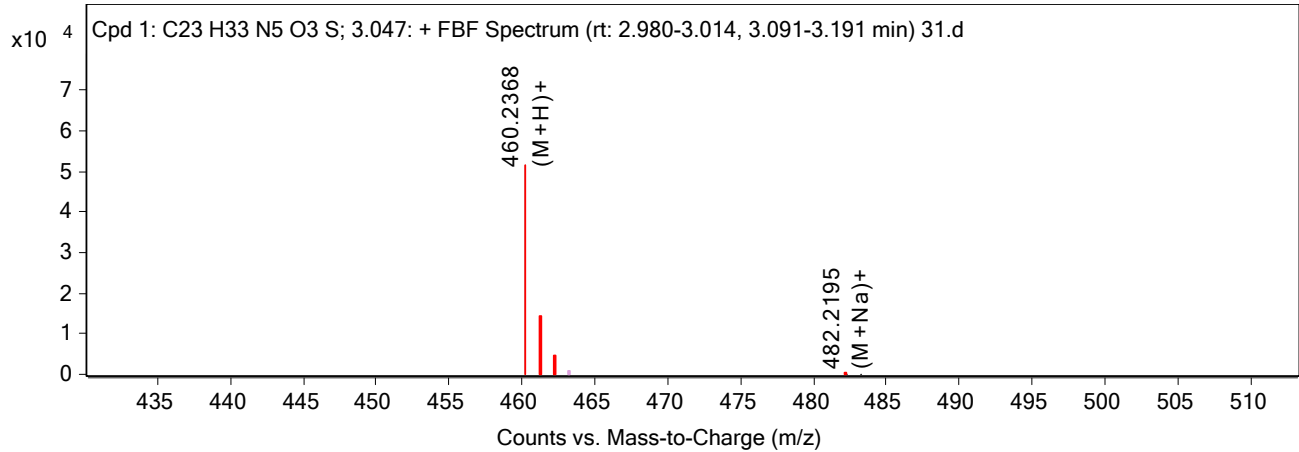

## MS Spectrum Peak List

| Obs. m/z | Charge | Abund    | Ion/Isotope |
|----------|--------|----------|-------------|
| 460.2368 | 1      | 51431.06 | (M+H)+      |
| 461.2394 | 1      | 11898.45 | (M+H)+      |
| 462.2374 | 1      | 3297.47  | (M+H)+      |
| 482.2195 | 1      | 206.4    | (M+Na)+     |
| 483.2333 | 1      | 92.87    | (M+Na)+     |

## MS Zoomed Spectrum

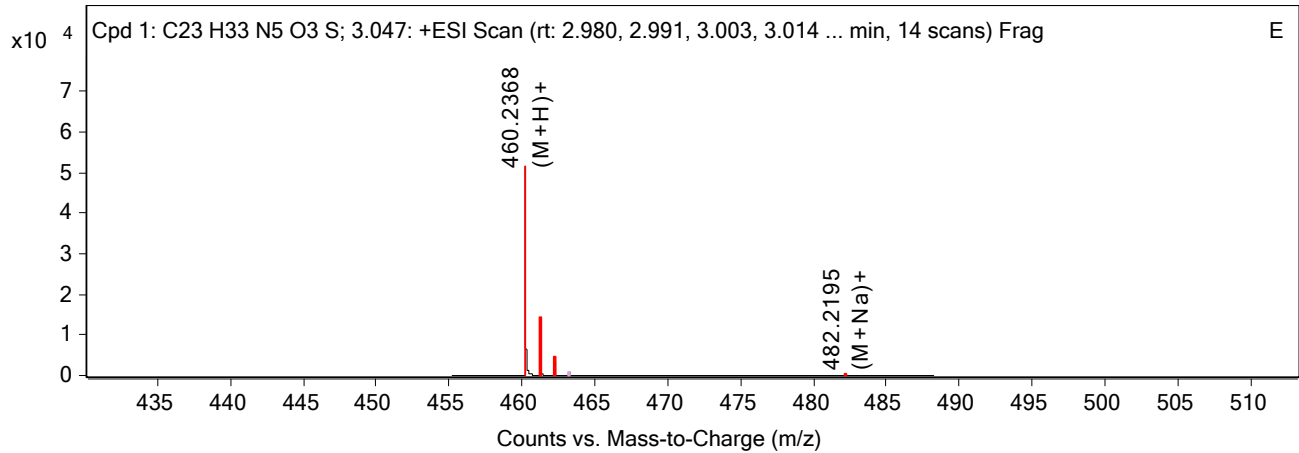

## MS Spectrum Peak List

| Obs. m/z | Charge | Abund    | Ion/Isotope | Tgt Mass Error (ppm) |
|----------|--------|----------|-------------|----------------------|
| 460.2368 | 1      | 51431.06 | (M+H)+      | 2                    |
| 460.2368 |        | 51431.06 |             |                      |
| 461.2394 | 1      | 11898.45 | (M+H)+      | 2.51                 |
| 462.2374 | 1      | 3297.47  | (M+H)+      | 1.97                 |
| 482.2195 | 1      | 206.4    | (M+Na)+     | 0.17                 |
| 483.2333 | 1      | 92.87    | (M+Na)+     | -22.42               |

--- End Of Report ---



# Target Compound Screening Report

|                                 |                                        |                               |                                                     |
|---------------------------------|----------------------------------------|-------------------------------|-----------------------------------------------------|
| <b>Data File</b>                | 6d.d                                   | <b>Sample Name</b>            | H2055790                                            |
| <b>Sample Type</b>              | Sample                                 | <b>Position</b>               | P1-C6                                               |
| <b>Instrument Name</b>          | Instrument 1                           | <b>User Name</b>              | Denis V.Bylina                                      |
| <b>Acq Method</b>               | Fast_Gradient_HRMS_pos_Lock_08272019.m | <b>Acquired Time</b>          | 10/7/2021 9:41:09 AM (UTC+03:00)                    |
| <b>IRM Calibration Status</b>   | Success                                | <b>DA Method</b>              | 1.m                                                 |
| <b>Comment</b>                  |                                        |                               |                                                     |
| <b>Sample Group</b>             |                                        | <b>Info.</b>                  | Agilent 6224 TOF LC/MS                              |
| <b>MFC</b>                      | C24H25ClN4O4                           | <b>Stream Name</b>            | LC 1                                                |
| <b>Acquisition Time (Local)</b> | 10/7/2021 9:41:09 AM (UTC+03:00)       | <b>Acquisition SW Version</b> | 6200 series TOF/6500 series Q-TOF B.08.00 (B8058.0) |
| <b>TOF Driver Version</b>       | 8.00.00                                | <b>TOF Firmware Version</b>   | 8.643                                               |
| <b>Tune Mass Range Max.</b>     | 1700                                   |                               |                                                     |

## Compound Table

| Label                          | Tgt Score | Mass Error (ppm) | Tgt Formula      | Obs. RT | Ref. Mass | Obs. Mass |
|--------------------------------|-----------|------------------|------------------|---------|-----------|-----------|
| Cpd 1: C24 H25 Cl N4 O4; 2.906 | 94.2      | -2.15            | C24 H25 Cl N4 O4 | 2.906   | 468.1564  | 468.1554  |

| Obs. m/z | Obs. RT | Obs. Mass | Tgt Formula      | Tgt Mass | Tgt Mass Error (ppm) | RT Diff.        | Find Cpd Algorithm |
|----------|---------|-----------|------------------|----------|----------------------|-----------------|--------------------|
| 491.1441 | 2.906   | 468.1554  | C24 H25 Cl N4 O4 | 468.1564 | -2.15                | Find By Formula |                    |

## Compound Chromatograms

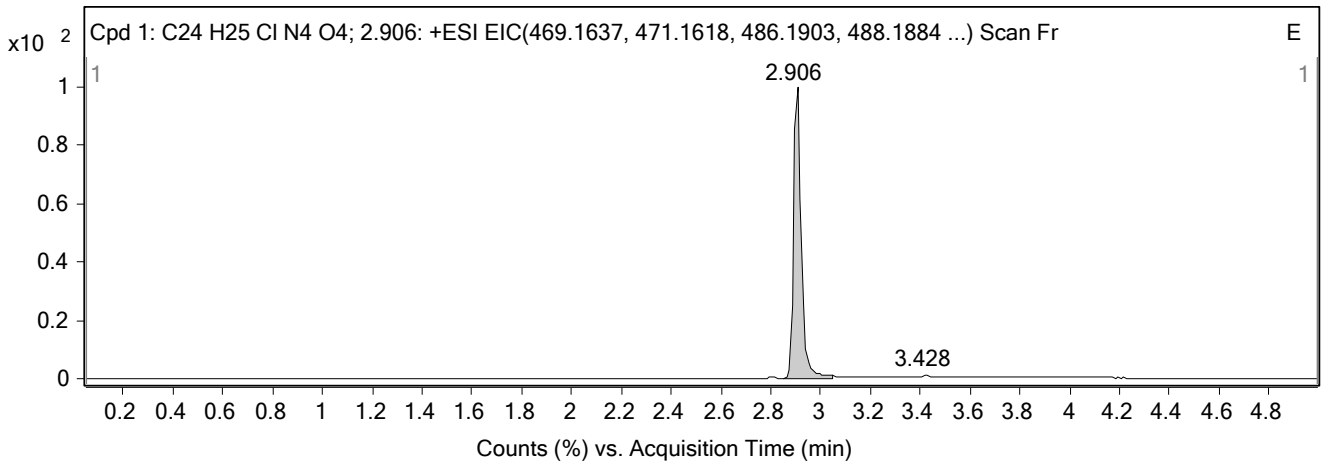

MS Zoomed Spectrum

# Target Compound Screening Report

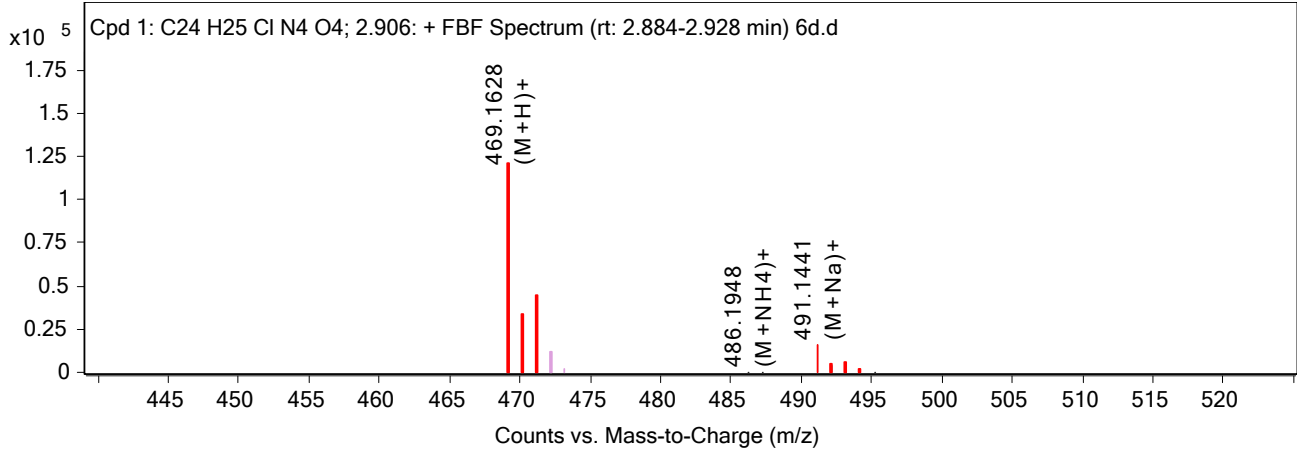

## MS Spectrum Peak List

| Obs. m/z | Charge | Abund     | Ion/Isotope           |
|----------|--------|-----------|-----------------------|
| 469.1628 | 1      | 120879.06 | (M+H)+                |
| 470.1655 | 1      | 26882.93  | (M+H)+                |
| 471.1611 | 1      | 35642.86  | (M+H)+                |
| 486.1948 | 1      | 67.61     | (M+NH <sub>4</sub> )+ |
| 487.1987 | 1      | 41.27     | (M+NH <sub>4</sub> )+ |
| 491.1441 | 1      | 16138.39  | (M+Na)+               |
| 492.1477 | 1      | 4173.06   | (M+Na)+               |
| 493.1423 | 1      | 5251.41   | (M+Na)+               |
| 494.1447 | 1      | 1381.58   | (M+Na)+               |
| 495.1498 | 1      | 240.35    | (M+Na)+               |

## MS Zoomed Spectrum

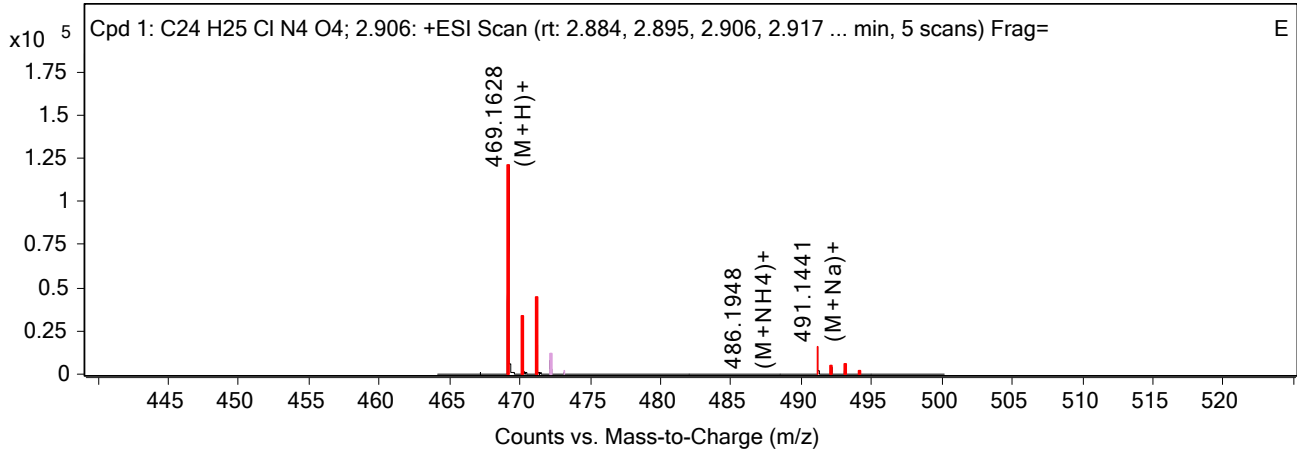

## MS Spectrum Peak List

| Obs. m/z | Charge | Abund     | Ion/Isotope           | Tgt Mass Error (ppm) |
|----------|--------|-----------|-----------------------|----------------------|
| 469.1628 | 1      | 120879.06 | (M+H)+                | 1.97                 |
| 470.1655 | 1      | 26882.93  | (M+H)+                | 2.73                 |
| 471.1611 | 1      | 35642.86  | (M+H)+                | 1.64                 |
| 486.1948 | 1      | 67.61     | (M+NH <sub>4</sub> )+ | -9.33                |
| 487.1987 | 1      | 41.27     | (M+NH <sub>4</sub> )+ | -11.15               |
| 491.1441 | 1      | 16138.39  | (M+Na)+               | 3.23                 |
| 492.1477 | 1      | 4173.06   | (M+Na)+               | 2.02                 |
| 493.1423 | 1      | 5251.41   | (M+Na)+               | 2.93                 |
| 494.1447 | 1      | 1381.58   | (M+Na)+               | 3.07                 |
| 495.1498 | 1      | 240.35    | (M+Na)+               | -2.01                |

--- End Of Report ---

# Target Compound Screening Report

|                                 |                                        |                               |                                                     |
|---------------------------------|----------------------------------------|-------------------------------|-----------------------------------------------------|
| <b>Data File</b>                | 2.d                                    | <b>Sample Name</b>            | H3464498                                            |
| <b>Sample Type</b>              | Sample                                 | <b>Position</b>               | P1-A2                                               |
| <b>Instrument Name</b>          | Instrument 1                           | <b>User Name</b>              | Denis V.Bylina                                      |
| <b>Acq Method</b>               | Fast_Gradient_HRMS_pos_Lock_08272019.m | <b>Acquired Time</b>          | 10/5/2021 5:45:16 PM (UTC+03:00)                    |
| <b>IRM Calibration Status</b>   | Success                                | <b>DA Method</b>              | 1.m                                                 |
| <b>Comment</b>                  |                                        |                               |                                                     |
| <b>Sample Group</b>             |                                        | <b>Info.</b>                  | Agilent 6224 TOF LC/MS                              |
| <b>MFC</b>                      | C21H16F3N3O2S2                         | <b>Stream Name</b>            | LC 1                                                |
| <b>Acquisition Time (Local)</b> | 10/5/2021 5:45:16 PM (UTC+03:00)       | <b>Acquisition SW Version</b> | 6200 series TOF/6500 series Q-TOF B.08.00 (B8058.0) |
| <b>TOF Driver Version</b>       | 8.00.00                                | <b>TOF Firmware Version</b>   | 8.643                                               |
| <b>Tune Mass Range Max.</b>     | 1700                                   |                               |                                                     |

## Compound Table

| Label                             | Tgt Score | Mass Error (ppm) | Tgt Formula         | Obs. RT | Ref. Mass | Obs. Mass |
|-----------------------------------|-----------|------------------|---------------------|---------|-----------|-----------|
| Cpd 1: C21 H16 F3 N3 O2 S2; 3.063 | 94.17     | -2.03            | C21 H16 F3 N3 O2 S2 | 3.063   | 463.0636  | 463.0627  |

| Obs. m/z | Obs. RT | Obs. Mass | Tgt Formula         | Tgt Mass | Tgt Mass Error (ppm) | RT Diff.        | Find Cpd Algorithm |
|----------|---------|-----------|---------------------|----------|----------------------|-----------------|--------------------|
| 464.0699 | 3.063   | 463.0627  | C21 H16 F3 N3 O2 S2 | 463.0636 | -2.03                | Find By Formula |                    |

## Compound Chromatograms

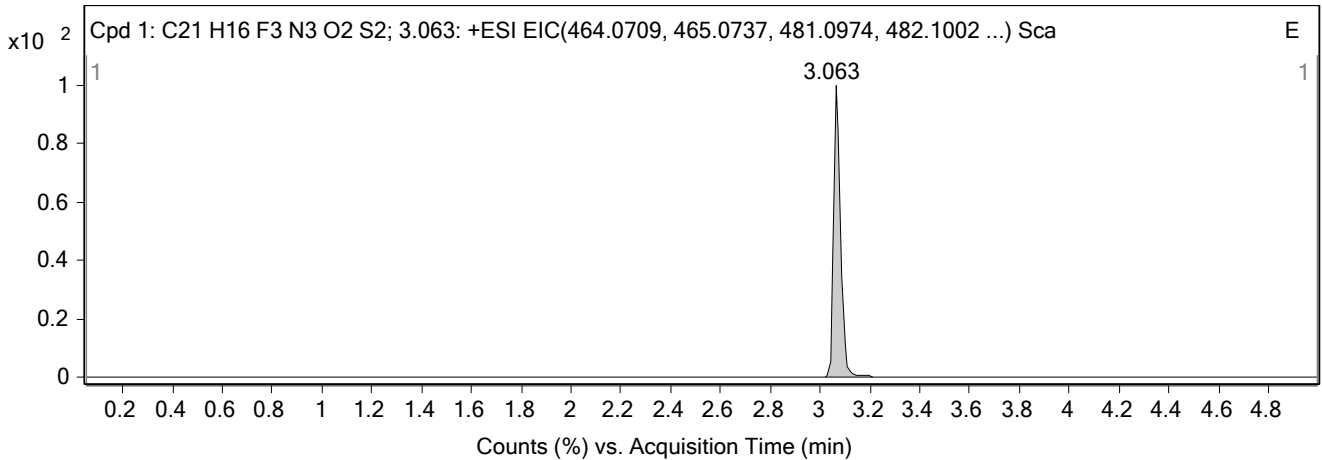

MS Zoomed Spectrum

# Target Compound Screening Report

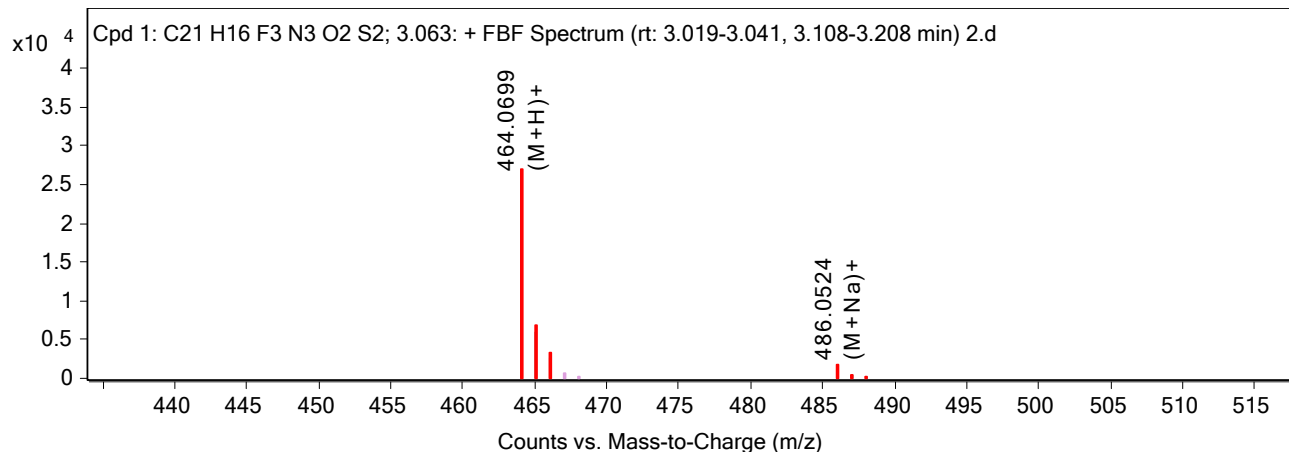

## MS Spectrum Peak List

| Obs. m/z | Charge | Abund    | Ion/Isotope |
|----------|--------|----------|-------------|
| 464.0699 | 1      | 27014.93 | (M+H)+      |
| 465.0729 | 1      | 5908.43  | (M+H)+      |
| 466.0683 | 1      | 2680.69  | (M+H)+      |
| 486.0524 | 1      | 1820.18  | (M+Na)+     |
| 487.0536 | 1      | 480.81   | (M+Na)+     |
| 488.0529 | 1      | 229.43   | (M+Na)+     |

## MS Zoomed Spectrum

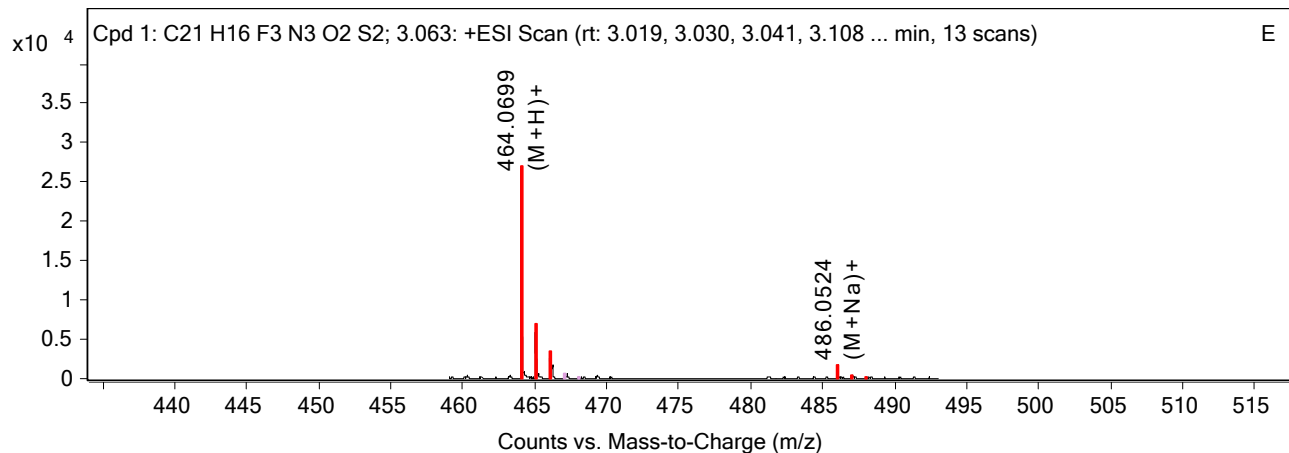

## MS Spectrum Peak List

| Obs. m/z | Charge | Abund    | Ion/Isotope | Tgt Mass Error (ppm) |
|----------|--------|----------|-------------|----------------------|
| 464.0699 | 1      | 27014.93 | (M+H)+      | 2.12                 |
| 465.0729 | 1      | 5908.43  | (M+H)+      | 1.75                 |
| 466.0683 | 1      | 2680.69  | (M+H)+      | 2.44                 |
| 486.0524 | 1      | 1820.18  | (M+Na)+     | 0.82                 |
| 487.0536 | 1      | 480.81   | (M+Na)+     | 4.3                  |
| 488.0529 | 1      | 229.43   | (M+Na)+     | -3                   |

--- End Of Report ---

# Target Compound Screening Report

|                                 |                                        |                               |                                                     |
|---------------------------------|----------------------------------------|-------------------------------|-----------------------------------------------------|
| <b>Data File</b>                | 51.d                                   | <b>Sample Name</b>            | H2049812                                            |
| <b>Sample Type</b>              | Sample                                 | <b>Position</b>               | P1-F6                                               |
| <b>Instrument Name</b>          | Instrument 1                           | <b>User Name</b>              | Denis V.Bylina                                      |
| <b>Acq Method</b>               | Fast_Gradient_HRMS_pos_Lock_08272019.m | <b>Acquired Time</b>          | 9/23/2021 3:54:14 PM (UTC+03:00)                    |
| <b>IRM Calibration Status</b>   | Success                                | <b>DA Method</b>              | 1.m                                                 |
| <b>Comment</b>                  |                                        |                               |                                                     |
| <b>Sample Group</b>             |                                        | <b>Info.</b>                  | Agilent 6224 TOF LC/MS                              |
| <b>MFC</b>                      | C18H17NO5S3                            | <b>Stream Name</b>            | LC 1                                                |
| <b>Acquisition Time (Local)</b> | 9/23/2021 3:54:14 PM (UTC+03:00)       | <b>Acquisition SW Version</b> | 6200 series TOF/6500 series Q-TOF B.08.00 (B8058.0) |
| <b>TOF Driver Version</b>       | 8.00.00                                | <b>TOF Firmware Version</b>   | 8.643                                               |
| <b>Tune Mass Range Max.</b>     | 1700                                   |                               |                                                     |

## Compound Table

| Label                         | Tgt Score | Mass Error (ppm) | Tgt Formula     | Obs. RT | Ref. Mass | Obs. Mass |
|-------------------------------|-----------|------------------|-----------------|---------|-----------|-----------|
| Cpd 1: C18 H17 N O5 S3; 2.845 | 96.87     | -0.14            | C18 H17 N O5 S3 | 2.845   | 423.0269  | 423.0268  |

| Obs. m/z | Obs. RT | Obs. Mass | Tgt Formula     | Tgt Mass | Tgt Mass Error (ppm) | RT Diff.        | Find Cpds Algorithm |
|----------|---------|-----------|-----------------|----------|----------------------|-----------------|---------------------|
| 446.0163 | 2.845   | 423.0268  | C18 H17 N O5 S3 | 423.0269 | -0.14                | Find By Formula |                     |

## Compound Chromatograms

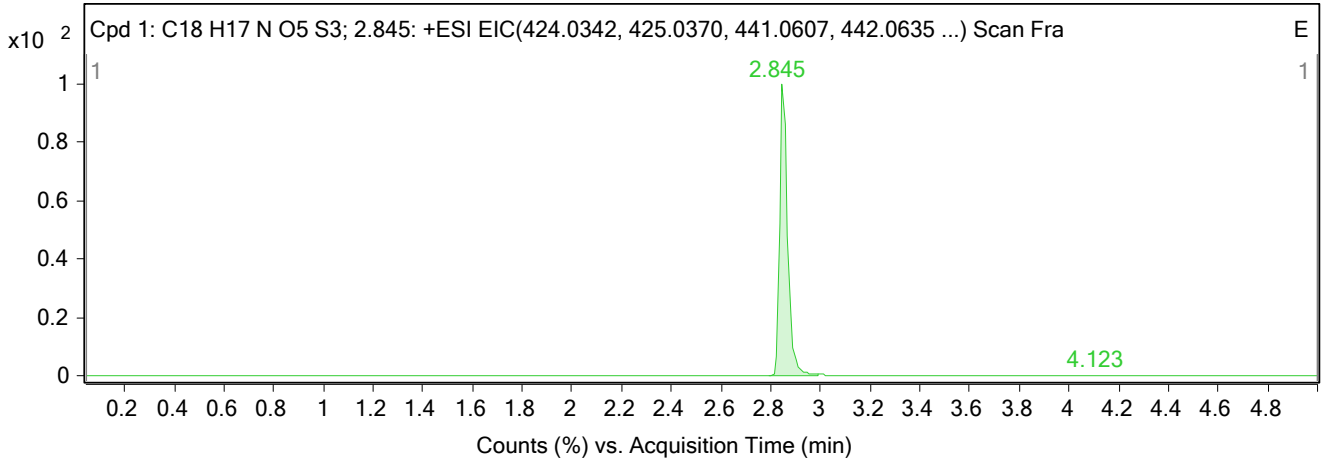

MS Zoomed Spectrum

# Target Compound Screening Report

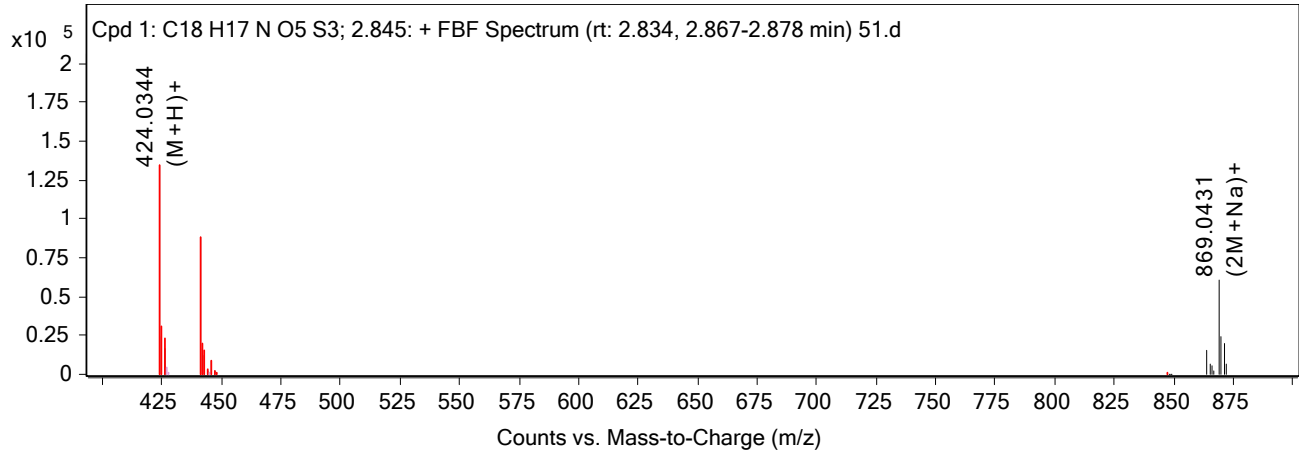

## MS Spectrum Peak List

| Obs. m/z | Charge | Abund     | Ion/Isotope |
|----------|--------|-----------|-------------|
| 424.0344 | 1      | 134384.28 | (M+H)+      |
| 425.0368 | 1      | 24419.9   | (M+H)+      |
| 426.032  | 1      | 16798.2   | (M+H)+      |
| 441.0609 | 1      | 88163.88  | (M+NH4)+    |
| 442.0632 | 1      | 16869.2   | (M+NH4)+    |
| 443.0583 | 1      | 11711.34  | (M+NH4)+    |
| 864.0865 | 1      | 15663.35  | (2M+NH4)+   |
| 869.0431 | 1      | 60359.11  | (2M+Na)+    |
| 870.0459 | 1      | 23990.24  | (2M+Na)+    |
| 871.0414 | 1      | 19461.12  | (2M+Na)+    |

## MS Zoomed Spectrum

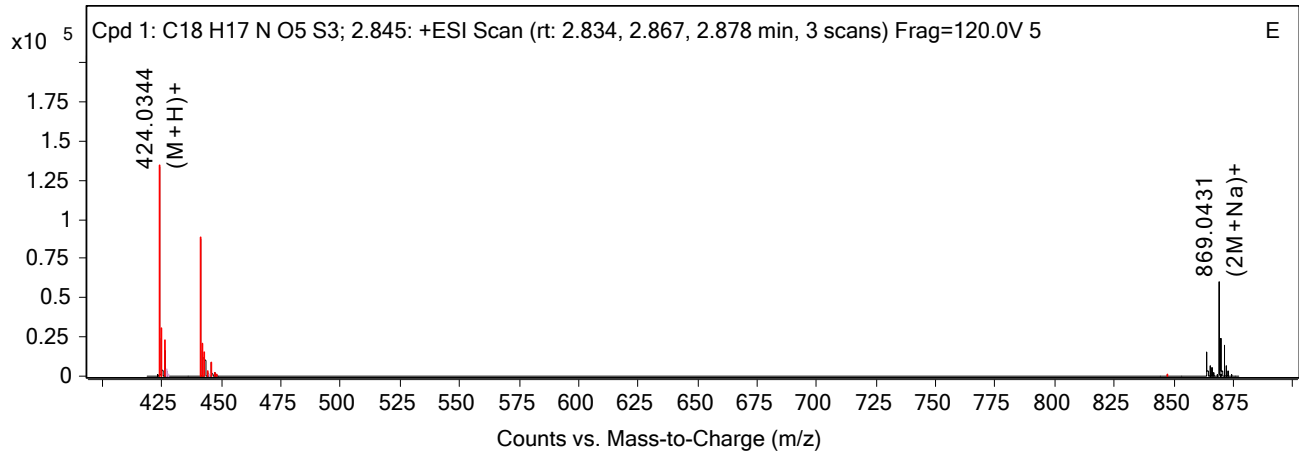

## MS Spectrum Peak List

| Obs. m/z | Charge | Abund     | Ion/Isotope | Tgt Mass Error (ppm) |
|----------|--------|-----------|-------------|----------------------|
| 424.0344 | 1      | 134384.28 | (M+H)+      | -0.46                |
| 425.0368 | 1      | 24419.9   | (M+H)+      | 0.44                 |
| 426.032  | 1      | 16798.2   | (M+H)+      | -0.18                |
| 441.0609 | 1      | 88163.88  | (M+NH4)+    | -0.4                 |
| 442.0632 | 1      | 16869.2   | (M+NH4)+    | 0.59                 |
| 443.0583 | 1      | 11711.34  | (M+NH4)+    | 0.28                 |
| 864.0865 | 1      | 15663.35  | (2M+NH4)+   | 1.23                 |
| 869.0431 | 1      | 60359.11  | (2M+Na)+    | -0.14                |
| 870.0459 | 1      | 23990.24  | (2M+Na)+    | -0.02                |
| 871.0414 | 1      | 19461.12  | (2M+Na)+    | 0.49                 |

--- End Of Report ---

# Target Compound Screening Report

|                                 |                                        |                               |                                                     |
|---------------------------------|----------------------------------------|-------------------------------|-----------------------------------------------------|
| <b>Data File</b>                | 1-2.d                                  | <b>Sample Name</b>            | H2045014                                            |
| <b>Sample Type</b>              | Sample                                 | <b>Position</b>               | P1-A1                                               |
| <b>Instrument Name</b>          | Instrument 1                           | <b>User Name</b>              | Denis V.Bylina                                      |
| <b>Acq Method</b>               | Fast_Gradient_HRMS_pos_Lock_08272019.m | <b>Acquired Time</b>          | 9/23/2021 11:15:03 AM (UTC+03:00)                   |
| <b>IRM Calibration Status</b>   | Success                                | <b>DA Method</b>              | 1.m                                                 |
| <b>Comment</b>                  |                                        |                               |                                                     |
| <b>Sample Group</b>             |                                        | <b>Info.</b>                  | Agilent 6224 TOF LC/MS                              |
| <b>MFC</b>                      | C22H21ClFN3O3S                         | <b>Stream Name</b>            | LC 1                                                |
| <b>Acquisition Time (Local)</b> | 9/23/2021 11:15:03 AM (UTC+03:00)      | <b>Acquisition SW Version</b> | 6200 series TOF/6500 series Q-TOF B.08.00 (B8058.0) |
| <b>TOF Driver Version</b>       | 8.00.00                                | <b>TOF Firmware Version</b>   | 8.643                                               |
| <b>Tune Mass Range Max.</b>     | 1700                                   |                               |                                                     |

### Compound Table

| Label                                 | Tgt Score | Mass Error (ppm) | Tgt Formula          | Obs. RT | Ref. Mass | Obs. Mass |
|---------------------------------------|-----------|------------------|----------------------|---------|-----------|-----------|
| Cpd 1: C22 H21 Cl F N3 O3 S;<br>3.466 | 95.94     | -2.1             | C22 H21 Cl F N3 O3 S | 3.466   | 461.0976  | 461.0967  |

| Obs. m/z | Obs. RT | Obs. Mass | Tgt Formula          | Tgt Mass | Tgt Mass Error (ppm) | RT Diff.        | Find Cpd Algorithm |
|----------|---------|-----------|----------------------|----------|----------------------|-----------------|--------------------|
| 462.1042 | 3.466   | 461.0967  | C22 H21 Cl F N3 O3 S | 461.0976 | -2.1                 | Find By Formula |                    |

### Compound Chromatograms

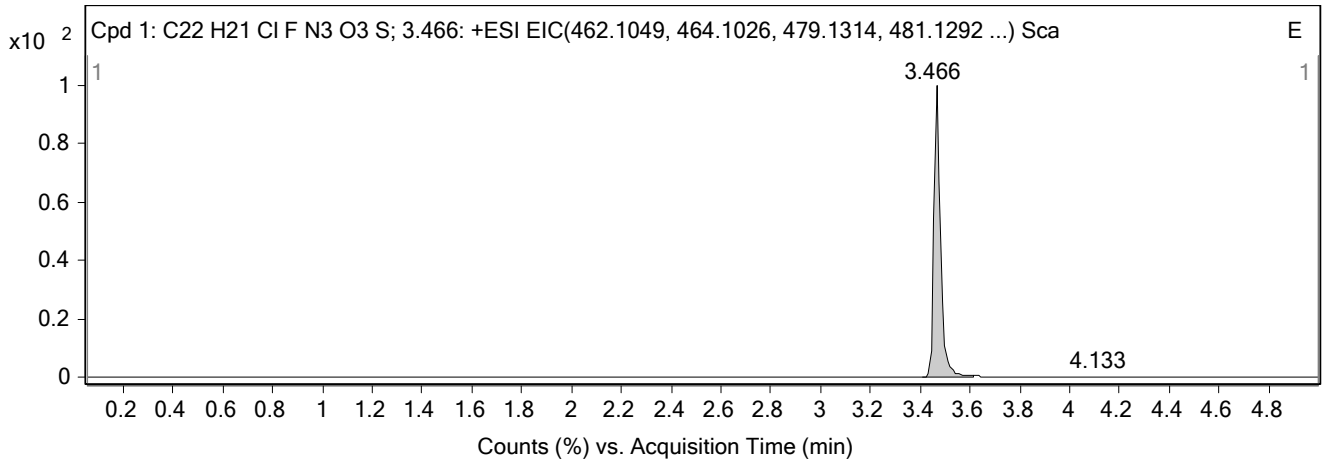

MS Zoomed Spectrum

# Target Compound Screening Report

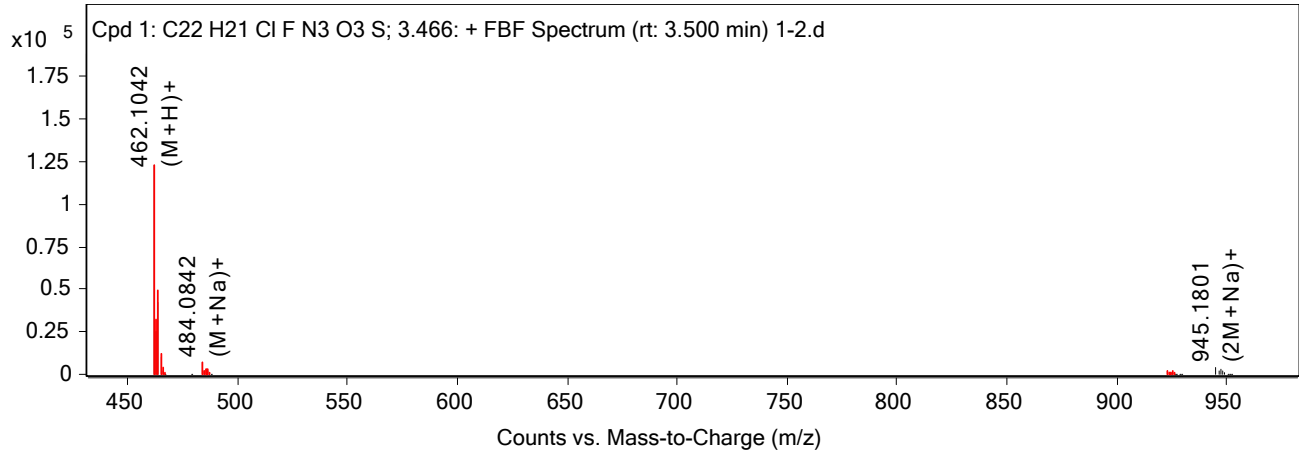

## MS Spectrum Peak List

| Obs. m/z | Charge | Abund     | Ion/Isotope |
|----------|--------|-----------|-------------|
| 462.1042 | 1      | 122704.11 | (M+H)+      |
| 463.107  | 1      | 25532.82  | (M+H)+      |
| 464.1019 | 1      | 42062.22  | (M+H)+      |
| 465.1042 | 1      | 9807.51   | (M+H)+      |
| 466.1024 | 1      | 2356.21   | (M+H)+      |
| 484.0842 | 1      | 7318.45   | (M+Na)+     |
| 486.0845 | 1      | 2551.92   | (M+Na)+     |
| 945.1801 | 1      | 4078.53   | (2M+Na)+    |
| 946.1871 | 1      | 1949.31   | (2M+Na)+    |
| 947.1822 | 1      | 3323.41   | (2M+Na)+    |

## MS Zoomed Spectrum

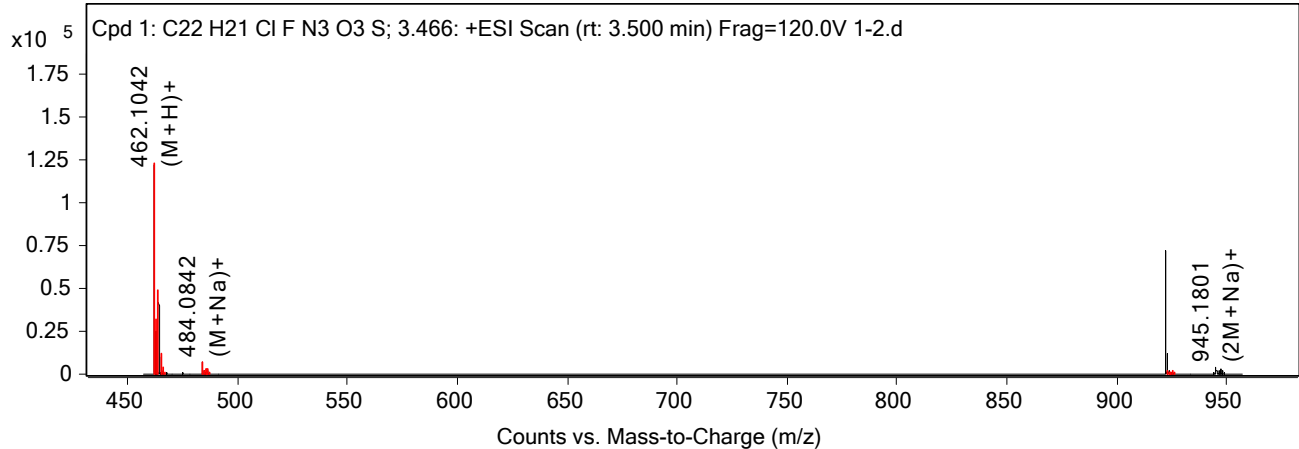

## MS Spectrum Peak List

| Obs. m/z | Charge | Abund     | Ion/Isotope | Tgt Mass Error (ppm) |
|----------|--------|-----------|-------------|----------------------|
| 462.1042 | 1      | 122704.11 | (M+H)+      | 1.47                 |
| 463.107  | 1      | 25532.82  | (M+H)+      | 2                    |
| 464.1019 | 1      | 42062.22  | (M+H)+      | 1.65                 |
| 465.1042 | 1      | 9807.51   | (M+H)+      | 2.09                 |
| 466.1024 | 1      | 2356.21   | (M+H)+      | 0.82                 |
| 484.0842 | 1      | 7318.45   | (M+Na)+     | 5.42                 |
| 486.0845 | 1      | 2551.92   | (M+Na)+     | 0.12                 |
| 945.1801 | 1      | 4078.53   | (2M+Na)+    | 4.65                 |
| 946.1871 | 1      | 1949.31   | (2M+Na)+    | 0.35                 |
| 947.1822 | 1      | 3323.41   | (2M+Na)+    | 0.7                  |

--- End Of Report ---



# Target Compound Screening Report

|                                 |                                        |                               |                                                     |
|---------------------------------|----------------------------------------|-------------------------------|-----------------------------------------------------|
| <b>Data File</b>                | 30.d                                   | <b>Sample Name</b>            | H2045019                                            |
| <b>Sample Type</b>              | Sample                                 | <b>Position</b>               | P1-D3                                               |
| <b>Instrument Name</b>          | Instrument 1                           | <b>User Name</b>              | Denis V.Bylina                                      |
| <b>Acq Method</b>               | Fast_Gradient_HRMS_pos_Lock_08272019.m | <b>Acquired Time</b>          | 9/23/2021 9:34:35 PM (UTC+03:00)                    |
| <b>IRM Calibration Status</b>   | Success                                | <b>DA Method</b>              | 1.m                                                 |
| <b>Comment</b>                  |                                        |                               |                                                     |
| <b>Sample Group</b>             |                                        | <b>Info.</b>                  | Agilent 6224 TOF LC/MS                              |
| <b>MFC</b>                      | C22H20ClN3O3S                          | <b>Stream Name</b>            | LC 1                                                |
| <b>Acquisition Time (Local)</b> | 9/23/2021 9:34:35 PM (UTC+03:00)       | <b>Acquisition SW Version</b> | 6200 series TOF/6500 series Q-TOF B.08.00 (B8058.0) |
| <b>TOF Driver Version</b>       | 8.00.00                                | <b>TOF Firmware Version</b>   | 8.643                                               |
| <b>Tune Mass Range Max.</b>     | 1700                                   |                               |                                                     |

## Compound Table

| Label                               | Tgt Score | Mass Error (ppm) | Tgt Formula        | Obs. RT | Ref. Mass | Obs. Mass |
|-------------------------------------|-----------|------------------|--------------------|---------|-----------|-----------|
| Cpd 1: C22 H20 Cl N3 O3 S;<br>2.269 | 97.2      | -1.99            | C22 H20 Cl N3 O3 S | 2.269   | 441.0914  | 441.0905  |

| Obs. m/z | Obs. RT | Obs. Mass | Tgt Formula        | Tgt Mass | Tgt Mass Error (ppm) | RT Diff.        | Find Cpd Algorithm |
|----------|---------|-----------|--------------------|----------|----------------------|-----------------|--------------------|
| 442.0978 | 2.269   | 441.0905  | C22 H20 Cl N3 O3 S | 441.0914 | -1.99                | Find By Formula |                    |

## Compound Chromatograms

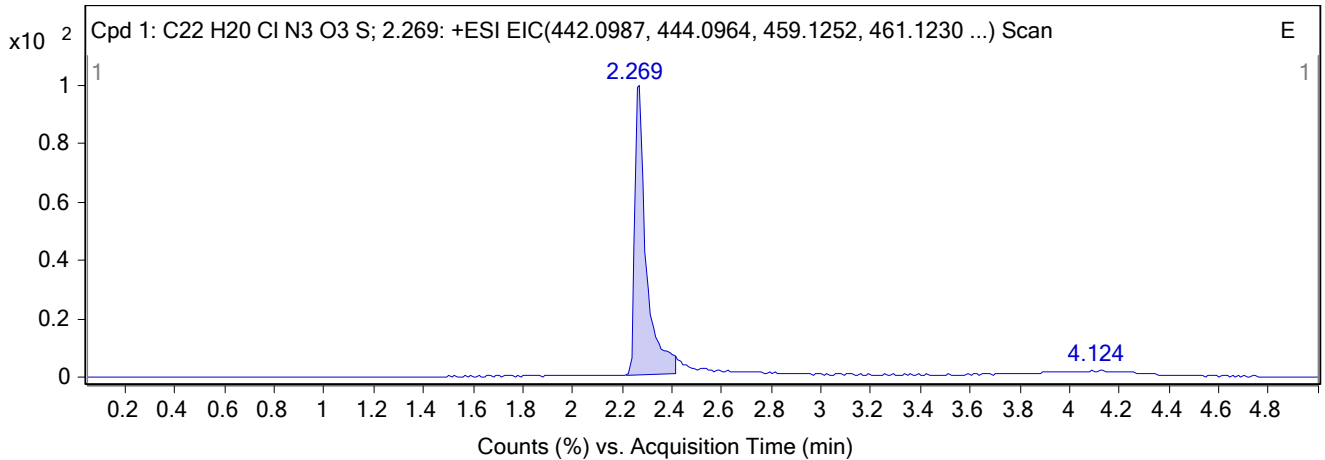

MS Zoomed Spectrum

# Target Compound Screening Report

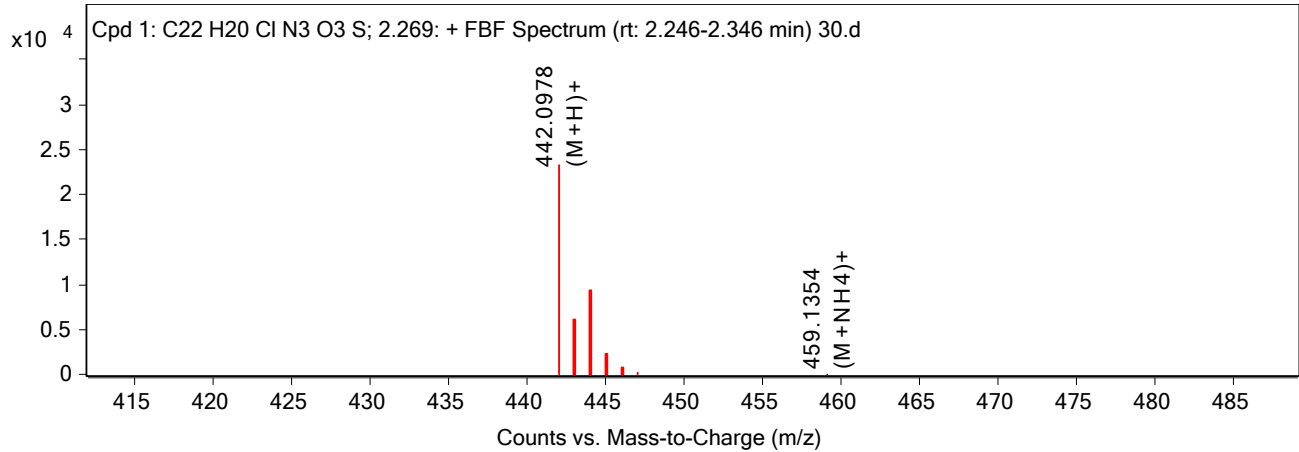

## MS Spectrum Peak List

| Obs. m/z | Charge | Abund    | Ion/Isotope           |
|----------|--------|----------|-----------------------|
| 442.0978 | 1      | 23221.43 | (M+H)+                |
| 443.1008 | 1      | 5174.75  | (M+H)+                |
| 444.0954 | 1      | 8345.08  | (M+H)+                |
| 445.0981 | 1      | 1935.73  | (M+H)+                |
| 446.0958 | 1      | 566.65   | (M+H)+                |
| 447.0971 | 1      | 159.72   | (M+H)+                |
| 459.1354 | 1      | 60.08    | (M+NH <sub>4</sub> )+ |

## MS Zoomed Spectrum

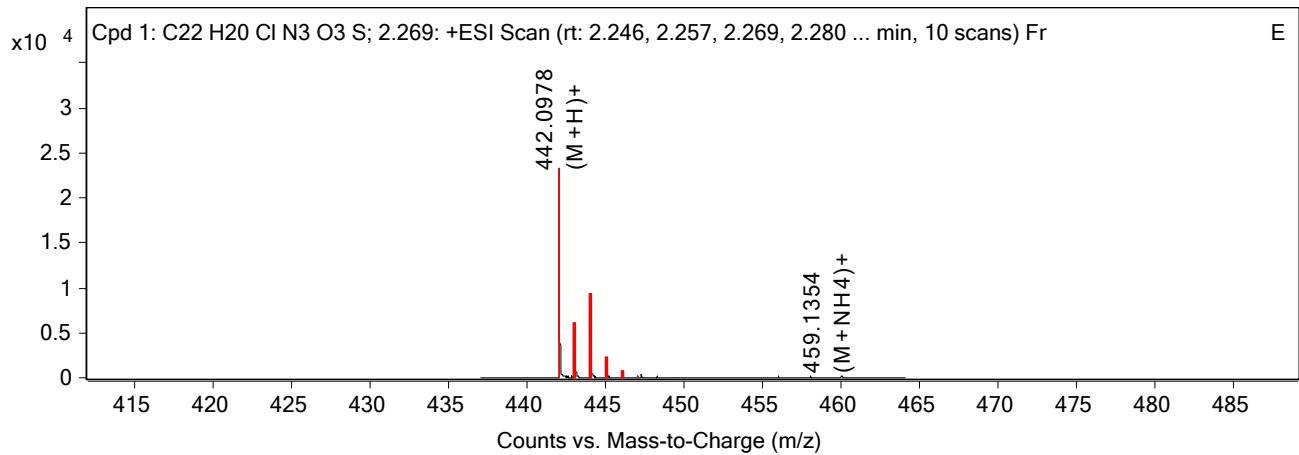

## MS Spectrum Peak List

| Obs. m/z | Charge | Abund    | Ion/Isotope           | Tgt Mass Error (ppm) |
|----------|--------|----------|-----------------------|----------------------|
| 442.0978 | 1      | 23221.43 | (M+H)+                | 1.97                 |
| 443.1008 | 1      | 5174.75  | (M+H)+                | 1.98                 |
| 444.0954 | 1      | 8345.08  | (M+H)+                | 2.3                  |
| 445.0981 | 1      | 1935.73  | (M+H)+                | 1.81                 |
| 446.0958 | 1      | 566.65   | (M+H)+                | 1.6                  |
| 447.0971 | 1      | 159.72   | (M+H)+                | 0.71                 |
| 459.1354 | 1      | 60.08    | (M+NH <sub>4</sub> )+ | -22.24               |

--- End Of Report ---

# Target Compound Screening Report

|                                 |                                        |                               |                                                     |
|---------------------------------|----------------------------------------|-------------------------------|-----------------------------------------------------|
| <b>Data File</b>                | 49.d                                   | <b>Sample Name</b>            | H2382810                                            |
| <b>Sample Type</b>              | Sample                                 | <b>Position</b>               | P1-F4                                               |
| <b>Instrument Name</b>          | Instrument 1                           | <b>User Name</b>              | Denis V.Bylina                                      |
| <b>Acq Method</b>               | Fast_Gradient_HRMS_pos_Lock_08272019.m | <b>Acquired Time</b>          | 9/23/2021 3:43:06 PM (UTC+03:00)                    |
| <b>IRM Calibration Status</b>   | Success                                | <b>DA Method</b>              | 1.m                                                 |
| <b>Comment</b>                  |                                        |                               |                                                     |
| <b>Sample Group</b>             |                                        | <b>Info.</b>                  | Agilent 6224 TOF LC/MS                              |
| <b>MFC</b>                      | C23H25N3O5                             | <b>Stream Name</b>            | LC 1                                                |
| <b>Acquisition Time (Local)</b> | 9/23/2021 3:43:06 PM (UTC+03:00)       | <b>Acquisition SW Version</b> | 6200 series TOF/6500 series Q-TOF B.08.00 (B8058.0) |
| <b>TOF Driver Version</b>       | 8.00.00                                | <b>TOF Firmware Version</b>   | 8.643                                               |
| <b>Tune Mass Range Max.</b>     | 1700                                   |                               |                                                     |

## Compound Table

| Label                       | Tgt Score | Mass Error (ppm) | Tgt Formula   | Obs. RT | Ref. Mass | Obs. Mass |
|-----------------------------|-----------|------------------|---------------|---------|-----------|-----------|
| Cpd 1: C23 H25 N3 O5; 2.933 | 99.02     | -1.38            | C23 H25 N3 O5 | 2.933   | 423.1794  | 423.1788  |

| Obs. m/z | Obs. RT | Obs. Mass | Tgt Formula   | Tgt Mass | Tgt Mass Error (ppm) | RT Diff.        | Find Cps Algorithm |
|----------|---------|-----------|---------------|----------|----------------------|-----------------|--------------------|
| 869.3477 | 2.933   | 423.1788  | C23 H25 N3 O5 | 423.1794 | -1.38                | Find By Formula |                    |

## Compound Chromatograms

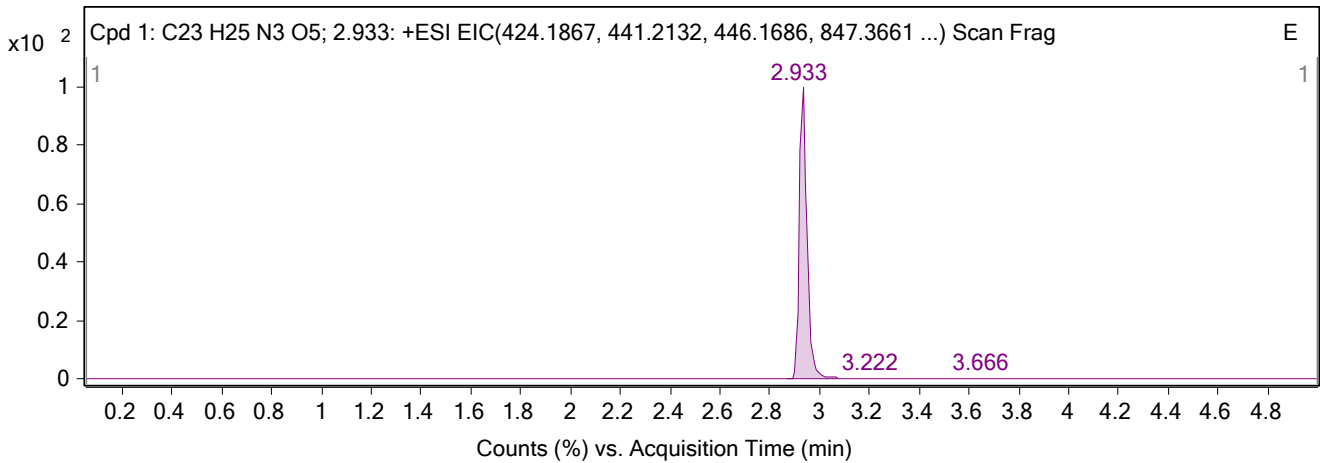

MS Zoomed Spectrum

# Target Compound Screening Report

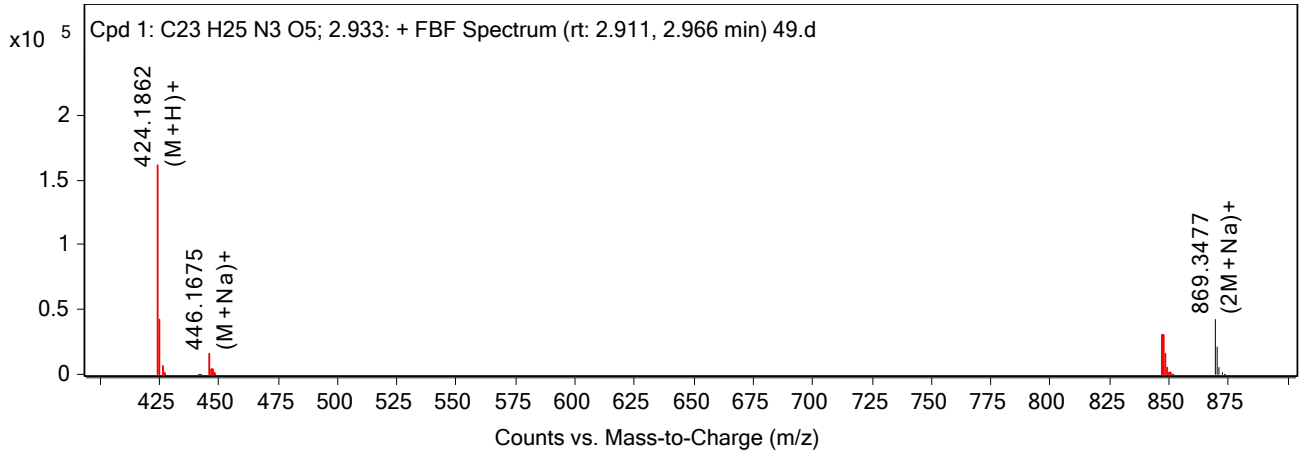

## MS Spectrum Peak List

| Obs. m/z | Charge | Abund     | Ion/Isotope |
|----------|--------|-----------|-------------|
| 424.1862 | 1      | 161157.53 | (M+H)+      |
| 425.1893 | 1      | 34475.91  | (M+H)+      |
| 426.1918 | 1      | 5216.42   | (M+H)+      |
| 446.1675 | 1      | 15690.04  | (M+Na)+     |
| 847.3659 | 1      | 29870.93  | (2M+H)+     |
| 848.3686 | 1      | 14771.41  | (2M+H)+     |
| 849.3696 | 1      | 4186.91   | (2M+H)+     |
| 869.3477 | 1      | 42831.88  | (2M+Na)+    |
| 870.3507 | 1      | 21448.79  | (2M+Na)+    |
| 871.352  | 1      | 5994.26   | (2M+Na)+    |

## MS Zoomed Spectrum

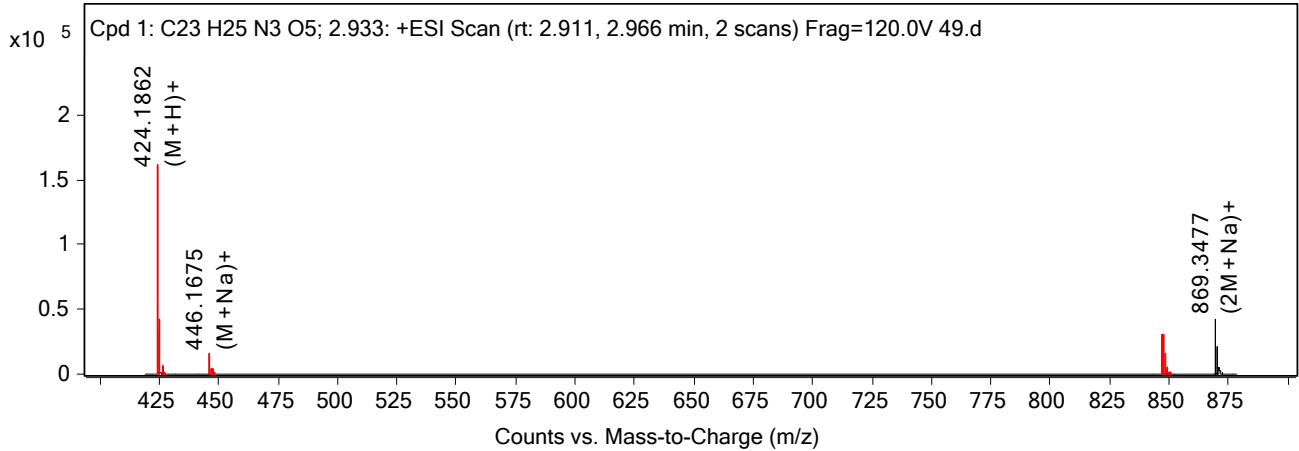

## MS Spectrum Peak List

| Obs. m/z | Charge | Abund     | Ion/Isotope | Tgt Mass Error (ppm) |
|----------|--------|-----------|-------------|----------------------|
| 424.1862 | 1      | 161157.54 | (M+H)+      | 1.17                 |
| 425.1893 | 1      | 34475.91  | (M+H)+      | 1.27                 |
| 426.1918 | 1      | 5216.42   | (M+H)+      | 1.68                 |
| 446.1675 | 1      | 15690.04  | (M+Na)+     | 2.52                 |
| 847.3659 | 1      | 29870.93  | (2M+H)+     | 0.25                 |
| 848.3686 | 1      | 14771.41  | (2M+H)+     | 0.77                 |
| 849.3696 | 1      | 4186.91   | (2M+H)+     | 2.97                 |
| 869.3477 | 1      | 42831.88  | (2M+Na)+    | 0.43                 |
| 870.3507 | 1      | 21448.79  | (2M+Na)+    | 0.59                 |
| 871.352  | 1      | 5994.26   | (2M+Na)+    | 2.36                 |

--- End Of Report ---

# Target Compound Screening Report

|                                 |                                        |                               |                                                     |
|---------------------------------|----------------------------------------|-------------------------------|-----------------------------------------------------|
| <b>Data File</b>                | 9.d                                    | <b>Sample Name</b>            | T8793466                                            |
| <b>Sample Type</b>              | Sample                                 | <b>Position</b>               | P1-A9                                               |
| <b>Instrument Name</b>          | Instrument 1                           | <b>User Name</b>              | Denis V.Bylina                                      |
| <b>Acq Method</b>               | Fast_Gradient_HRMS_pos_Lock_08272019.m | <b>Acquired Time</b>          | 10/5/2021 6:24:12 PM (UTC+03:00)                    |
| <b>IRM Calibration Status</b>   | Success                                | <b>DA Method</b>              | 1.m                                                 |
| <b>Comment</b>                  |                                        |                               |                                                     |
| <b>Sample Group</b>             |                                        | <b>Info.</b>                  | Agilent 6224 TOF LC/MS                              |
| <b>MFC</b>                      | C25H23ClN4O3                           | <b>Stream Name</b>            | LC 1                                                |
| <b>Acquisition Time (Local)</b> | 10/5/2021 6:24:12 PM (UTC+03:00)       | <b>Acquisition SW Version</b> | 6200 series TOF/6500 series Q-TOF B.08.00 (B8058.0) |
| <b>TOF Driver Version</b>       | 8.00.00                                | <b>TOF Firmware Version</b>   | 8.643                                               |
| <b>Tune Mass Range Max.</b>     | 1700                                   |                               |                                                     |

### Compound Table

| Label                          | Tgt Score | Mass Error (ppm) | Tgt Formula      | Obs. RT | Ref. Mass | Obs. Mass |
|--------------------------------|-----------|------------------|------------------|---------|-----------|-----------|
| Cpd 1: C25 H23 Cl N4 O3; 2.622 | 94.96     | -2.02            | C25 H23 Cl N4 O3 | 2.622   | 462.1459  | 462.1449  |

| Obs. m/z | Obs. RT | Obs. Mass | Tgt Formula      | Tgt Mass | Tgt Mass Error (ppm) | RT Diff.        | Find Cpds Algorithm |
|----------|---------|-----------|------------------|----------|----------------------|-----------------|---------------------|
| 463.1524 | 2.622   | 462.1449  | C25 H23 Cl N4 O3 | 462.1459 | -2.02                | Find By Formula |                     |

### Compound Chromatograms

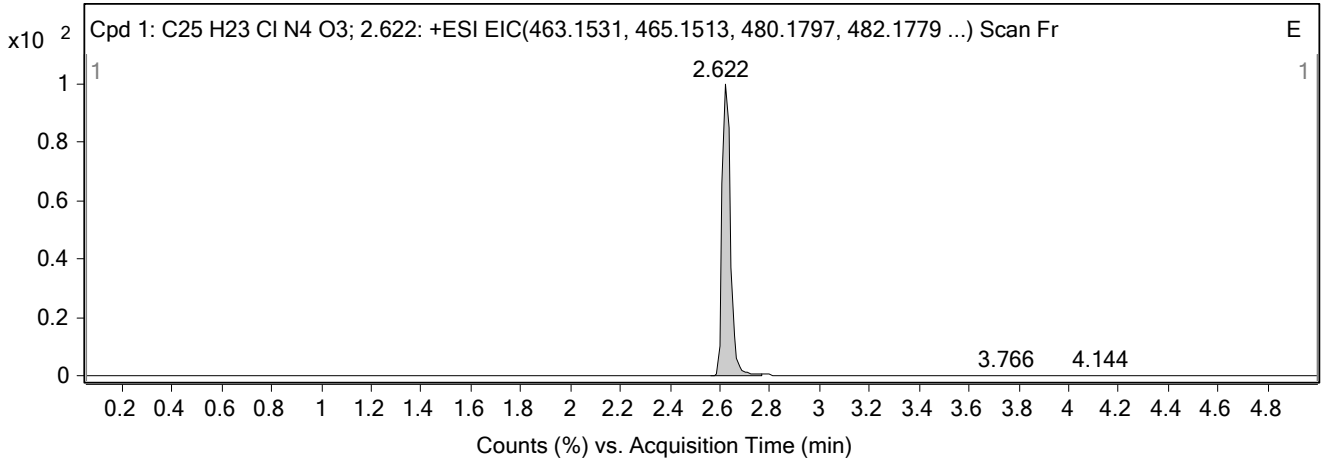

MS Zoomed Spectrum

# Target Compound Screening Report

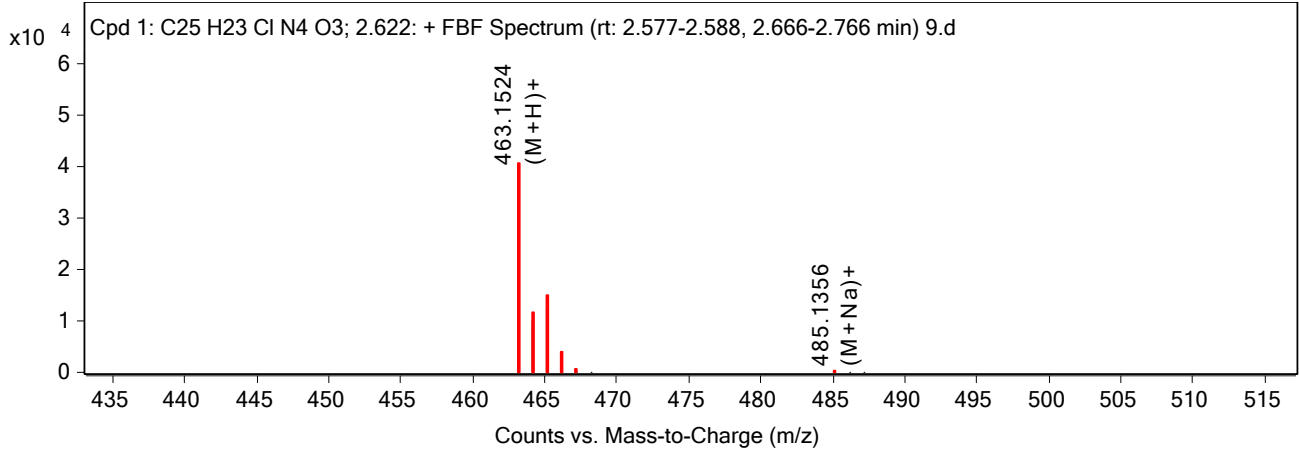

## MS Spectrum Peak List

| Obs. m/z | Charge | Abund    | Ion/Isotope |
|----------|--------|----------|-------------|
| 463.1524 | 1      | 40632.36 | (M+H)+      |
| 464.1548 | 1      | 10089.17 | (M+H)+      |
| 465.1501 | 1      | 12766.08 | (M+H)+      |
| 466.1523 | 1      | 3113.97  | (M+H)+      |
| 467.1557 | 1      | 451.45   | (M+H)+      |
| 468.1586 | 1      | 101.58   | (M+H)+      |
| 485.1356 | 1      | 381.55   | (M+Na)+     |
| 486.134  | 1      | 185.47   | (M+Na)+     |
| 487.1337 | 1      | 157.38   | (M+Na)+     |

## MS Zoomed Spectrum

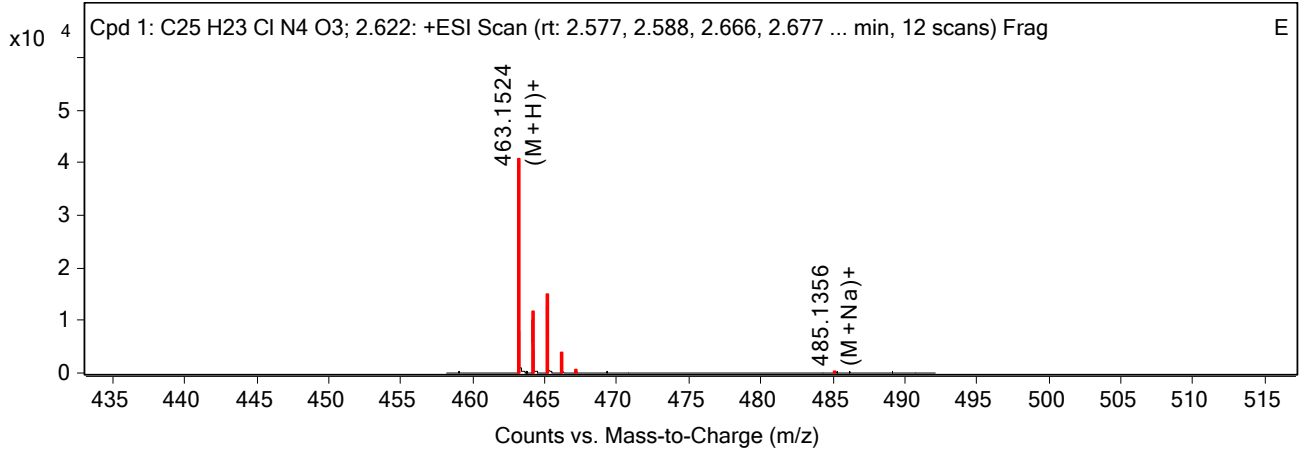

## MS Spectrum Peak List

| Obs. m/z | Charge | Abund    | Ion/Isotope | Tgt Mass Error (ppm) |
|----------|--------|----------|-------------|----------------------|
| 463.1524 | 1      | 40632.36 | (M+H)+      | 1.53                 |
| 464.1548 | 1      | 10089.17 | (M+H)+      | 2.98                 |
| 465.1501 | 1      | 12766.08 | (M+H)+      | 2.58                 |
| 466.1523 | 1      | 3113.97  | (M+H)+      | 3.12                 |
| 467.1557 | 1      | 451.45   | (M+H)+      | 1.3                  |
| 468.1586 | 1      | 101.58   | (M+H)+      | 0.7                  |
| 485.1356 | 1      | 381.55   | (M+Na)+     | -1.01                |
| 486.134  | 1      | 185.47   | (M+Na)+     | 8.51                 |
| 487.1337 | 1      | 157.38   | (M+Na)+     | -0.88                |

--- End Of Report ---

# Target Compound Screening Report

|                                 |                                        |                               |                                                     |
|---------------------------------|----------------------------------------|-------------------------------|-----------------------------------------------------|
| <b>Data File</b>                | 1.d                                    | <b>Sample Name</b>            | H3467611                                            |
| <b>Sample Type</b>              | Sample                                 | <b>Position</b>               | P1-A1                                               |
| <b>Instrument Name</b>          | Instrument 1                           | <b>User Name</b>              | Denis V.Bylina                                      |
| <b>Acq Method</b>               | Fast_Gradient_HRMS_pos_Lock_08272019.m | <b>Acquired Time</b>          | 10/5/2021 5:39:45 PM (UTC+03:00)                    |
| <b>IRM Calibration Status</b>   | Success                                | <b>DA Method</b>              | 1.m                                                 |
| <b>Comment</b>                  |                                        |                               |                                                     |
| <b>Sample Group</b>             |                                        | <b>Info.</b>                  | Agilent 6224 TOF LC/MS                              |
| <b>MFC</b>                      | C26H24N4O2                             | <b>Stream Name</b>            | LC 1                                                |
| <b>Acquisition Time (Local)</b> | 10/5/2021 5:39:45 PM (UTC+03:00)       | <b>Acquisition SW Version</b> | 6200 series TOF/6500 series Q-TOF B.08.00 (B8058.0) |
| <b>TOF Driver Version</b>       | 8.00.00                                | <b>TOF Firmware Version</b>   | 8.643                                               |
| <b>Tune Mass Range Max.</b>     | 1700                                   |                               |                                                     |

## Compound Table

| Label                       | Tgt Score | Mass Error (ppm) | Tgt Formula   | Obs. RT | Ref. Mass | Obs. Mass |
|-----------------------------|-----------|------------------|---------------|---------|-----------|-----------|
| Cpd 1: C26 H24 N4 O2; 3.148 | 92.6      | -0.74            | C26 H24 N4 O2 | 3.148   | 424.1899  | 424.1896  |

| Obs. m/z | Obs. RT | Obs. Mass | Tgt Formula   | Tgt Mass | Tgt Mass Error (ppm) | RT Diff.        | Find Cpds Algorithm |
|----------|---------|-----------|---------------|----------|----------------------|-----------------|---------------------|
| 425.1966 | 3.148   | 424.1896  | C26 H24 N4 O2 | 424.1899 | -0.74                | Find By Formula |                     |

## Compound Chromatograms

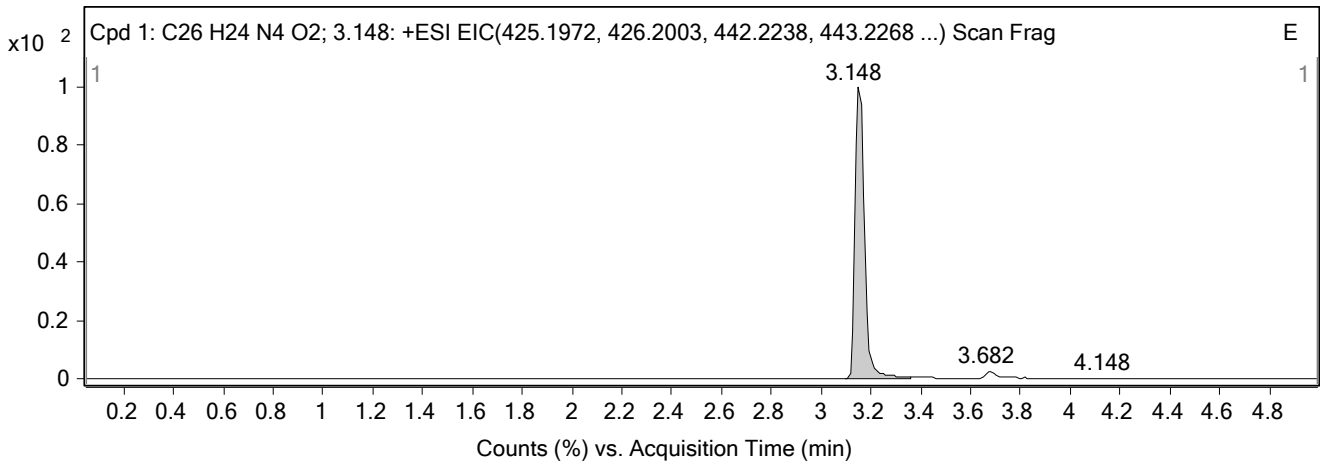

MS Zoomed Spectrum

# Target Compound Screening Report

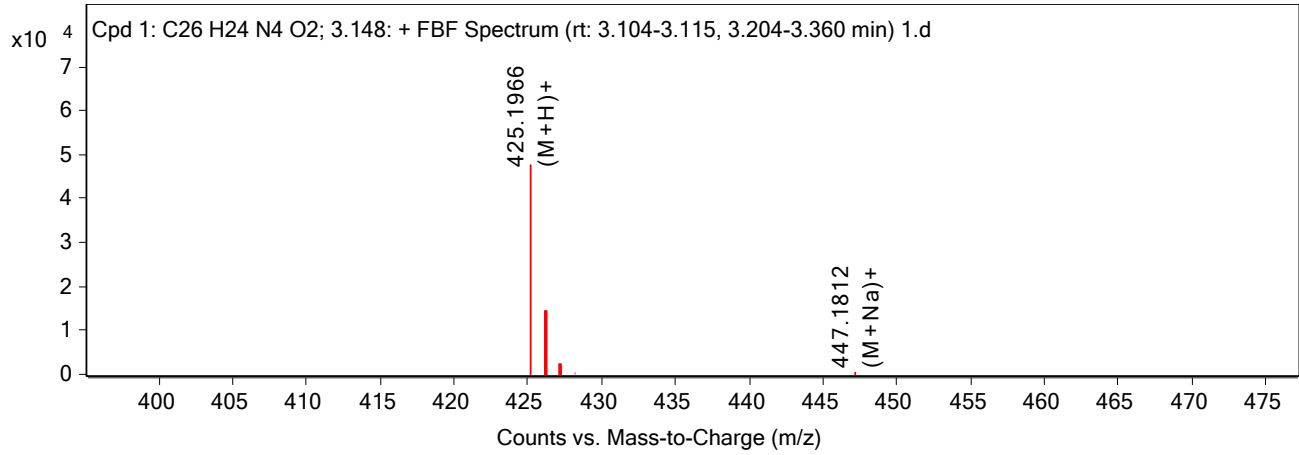

## MS Spectrum Peak List

| Obs. m/z | Charge | Abund    | Ion/Isotope |
|----------|--------|----------|-------------|
| 425.1966 | 1      | 47685    | (M+H)+      |
| 426.1997 | 1      | 12483.08 | (M+H)+      |
| 427.2112 | 1      | 2150.48  | (M+H)+      |
| 447.1812 | 1      | 556.71   | (M+Na)+     |

## MS Zoomed Spectrum

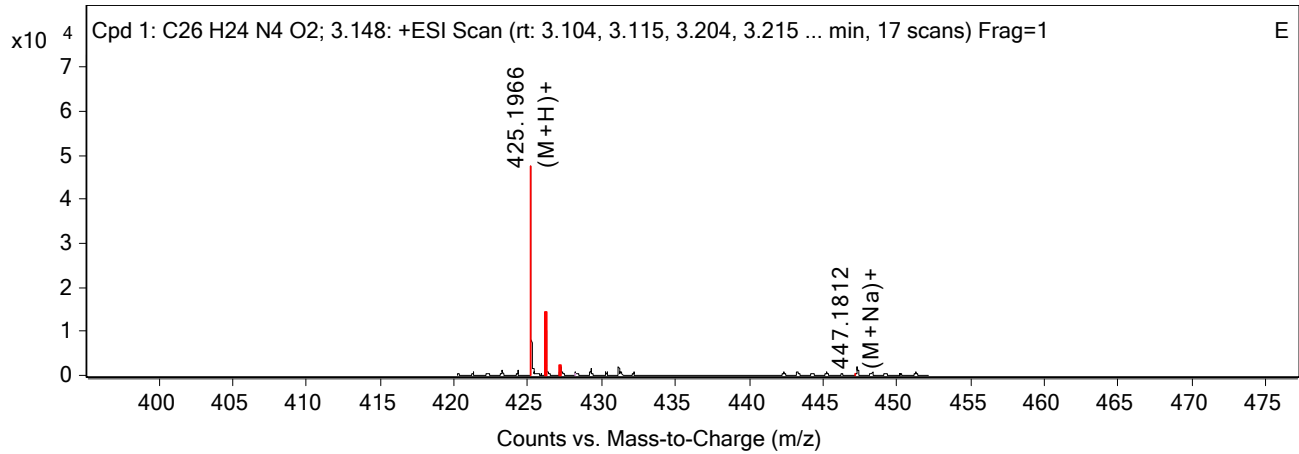

## MS Spectrum Peak List

| Obs. m/z | Charge | Abund    | Ion/Isotope | Tgt Mass Error (ppm) |
|----------|--------|----------|-------------|----------------------|
| 425.1966 | 1      | 47685    | (M+H)+      | 1.51                 |
| 426.1997 | 1      | 12483.07 | (M+H)+      | 1.38                 |
| 427.2112 | 1      | 2150.48  | (M+H)+      | -18.69               |
| 447.1812 | 1      | 556.71   | (M+Na)+     | -4.48                |

--- End Of Report ---



# Target Compound Screening Report

|                                 |                                        |                               |                                                     |
|---------------------------------|----------------------------------------|-------------------------------|-----------------------------------------------------|
| <b>Data File</b>                | 19.d                                   | <b>Sample Name</b>            | H2994757                                            |
| <b>Sample Type</b>              | Sample                                 | <b>Position</b>               | P1-C1                                               |
| <b>Instrument Name</b>          | Instrument 1                           | <b>User Name</b>              | Denis V.Bylina                                      |
| <b>Acq Method</b>               | Fast_Gradient_HRMS_pos_Lock_08272019.m | <b>Acquired Time</b>          | 9/22/2021 3:27:54 PM (UTC+03:00)                    |
| <b>IRM Calibration Status</b>   | Success                                | <b>DA Method</b>              | 1.m                                                 |
| <b>Comment</b>                  |                                        |                               |                                                     |
| <b>Sample Group</b>             |                                        | <b>Info.</b>                  | Agilent 6224 TOF LC/MS                              |
| <b>MFC</b>                      | C24H26N4O4S                            | <b>Stream Name</b>            | LC 1                                                |
| <b>Acquisition Time (Local)</b> | 9/22/2021 3:27:54 PM (UTC+03:00)       | <b>Acquisition SW Version</b> | 6200 series TOF/6500 series Q-TOF B.08.00 (B8058.0) |
| <b>TOF Driver Version</b>       | 8.00.00                                | <b>TOF Firmware Version</b>   | 8.643                                               |
| <b>Tune Mass Range Max.</b>     | 1700                                   |                               |                                                     |

## Compound Table

| Label                         | Tgt Score | Mass Error (ppm) | Tgt Formula     | Obs. RT | Ref. Mass | Obs. Mass |
|-------------------------------|-----------|------------------|-----------------|---------|-----------|-----------|
| Cpd 1: C24 H26 N4 O4 S; 2.977 | 98.29     | 0.51             | C24 H26 N4 O4 S | 2.977   | 466.1675  | 466.1677  |

| Obs. m/z | Obs. RT | Obs. Mass | Tgt Formula     | Tgt Mass | Tgt Mass Error (ppm) | RT Diff.        | Find Cpds Algorithm |
|----------|---------|-----------|-----------------|----------|----------------------|-----------------|---------------------|
| 489.1566 | 2.977   | 466.1677  | C24 H26 N4 O4 S | 466.1675 | 0.51                 | Find By Formula |                     |

## Compound Chromatograms

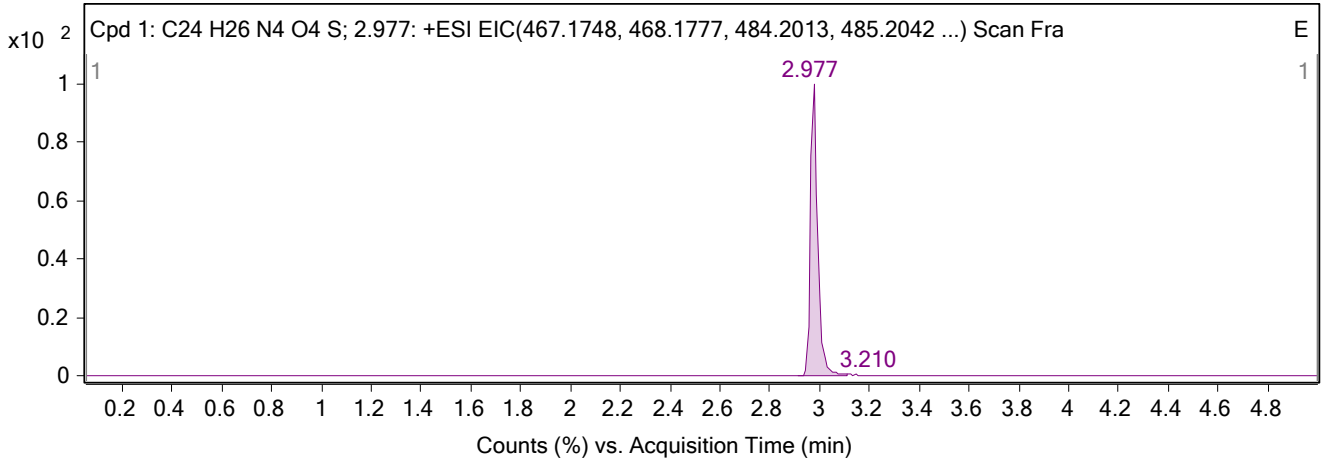

MS Zoomed Spectrum

# Target Compound Screening Report

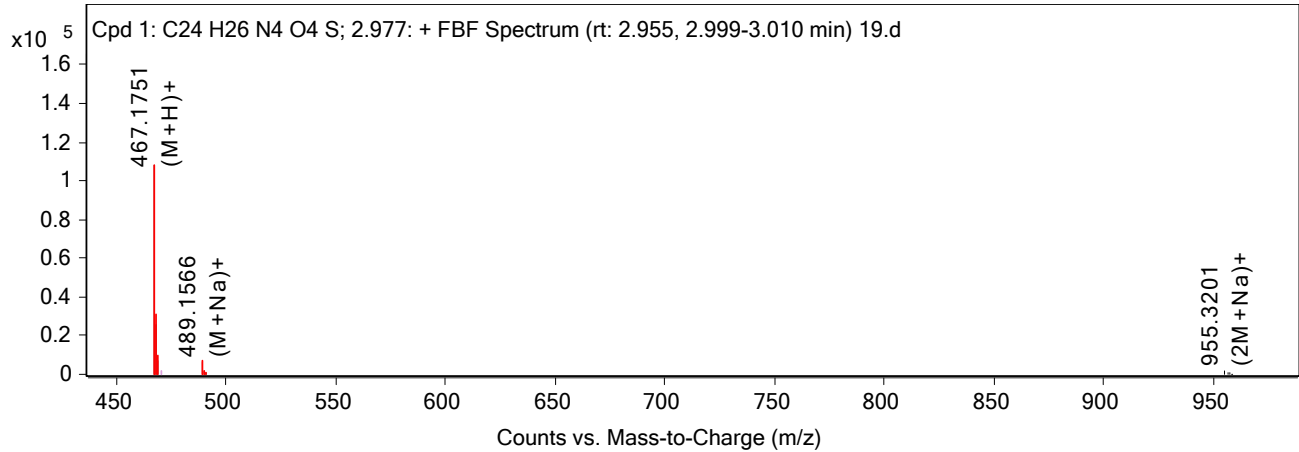

### MS Spectrum Peak List

| Obs. m/z | Charge | Abund     | Ion/Isotope |
|----------|--------|-----------|-------------|
| 467.1751 | 1      | 107970.35 | (M+H)+      |
| 468.1781 | 1      | 25957.75  | (M+H)+      |
| 469.1752 | 1      | 6925.37   | (M+H)+      |
| 489.1566 | 1      | 6698.95   | (M+Na)+     |
| 490.1607 | 1      | 1962.07   | (M+Na)+     |
| 491.1565 | 1      | 610.57    | (M+Na)+     |
| 955.3201 | 1      | 2034.22   | (2M+Na)+    |
| 956.3252 | 1      | 1190.13   | (2M+Na)+    |
| 957.3235 | 1      | 500.47    | (2M+Na)+    |
| 958.3208 | 1      | 172.4     | (2M+Na)+    |

### MS Zoomed Spectrum

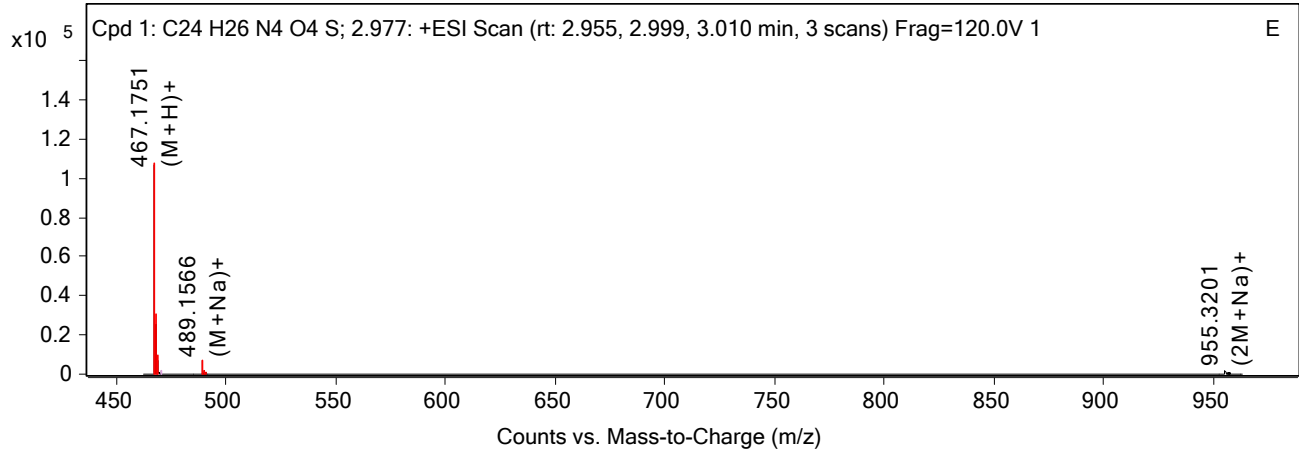

### MS Spectrum Peak List

| Obs. m/z | Charge | Abund     | Ion/Isotope | Tgt Mass Error (ppm) |
|----------|--------|-----------|-------------|----------------------|
| 467.1751 | 1      | 107970.35 | (M+H)+      | -0.84                |
| 468.1781 | 1      | 25957.75  | (M+H)+      | -0.82                |
| 469.1752 | 1      | 6925.37   | (M+H)+      | 1.01                 |
| 489.1566 | 1      | 6698.95   | (M+Na)+     | 0.12                 |
| 490.1607 | 1      | 1962.07   | (M+Na)+     | -2.08                |
| 491.1565 | 1      | 610.57    | (M+Na)+     | 2.27                 |
| 955.3201 | 1      | 2034.22   | (2M+Na)+    | 4.24                 |
| 956.3252 | 1      | 1190.13   | (2M+Na)+    | 2.02                 |
| 957.3235 | 1      | 500.47    | (2M+Na)+    | 3.24                 |
| 958.3208 | 1      | 172.4     | (2M+Na)+    | 6.63                 |

--- End Of Report ---

# Target Compound Screening Report

|                                 |                                        |                               |                                                     |
|---------------------------------|----------------------------------------|-------------------------------|-----------------------------------------------------|
| <b>Data File</b>                | 39.d                                   | <b>Sample Name</b>            | H2045144                                            |
| <b>Sample Type</b>              | Sample                                 | <b>Position</b>               | P1-E3                                               |
| <b>Instrument Name</b>          | Instrument 1                           | <b>User Name</b>              | Denis V.Bylina                                      |
| <b>Acq Method</b>               | Fast_Gradient_HRMS_pos_Lock_08272019.m | <b>Acquired Time</b>          | 9/23/2021 2:47:38 PM (UTC+03:00)                    |
| <b>IRM Calibration Status</b>   | Success                                | <b>DA Method</b>              | 1.m                                                 |
| <b>Comment</b>                  |                                        |                               |                                                     |
| <b>Sample Group</b>             |                                        | <b>Info.</b>                  | Agilent 6224 TOF LC/MS                              |
| <b>MFC</b>                      | C22H25N5O                              | <b>Stream Name</b>            | LC 1                                                |
| <b>Acquisition Time (Local)</b> | 9/23/2021 2:47:38 PM (UTC+03:00)       | <b>Acquisition SW Version</b> | 6200 series TOF/6500 series Q-TOF B.08.00 (B8058.0) |
| <b>TOF Driver Version</b>       | 8.00.00                                | <b>TOF Firmware Version</b>   | 8.643                                               |
| <b>Tune Mass Range Max.</b>     | 1700                                   |                               |                                                     |

## Compound Table

| Label                      | Tgt Score | Mass Error (ppm) | Tgt Formula  | Obs. RT | Ref. Mass | Obs. Mass |
|----------------------------|-----------|------------------|--------------|---------|-----------|-----------|
| Cpd 1: C22 H25 N5 O; 1.636 | 98.93     | -0.46            | C22 H25 N5 O | 1.636   | 375.2059  | 375.2057  |

| Obs. m/z | Obs. RT | Obs. Mass | Tgt Formula  | Tgt Mass | Tgt Mass Error (ppm) | RT Diff.        | Find Cpd Algorithm |
|----------|---------|-----------|--------------|----------|----------------------|-----------------|--------------------|
| 376.213  | 1.636   | 375.2057  | C22 H25 N5 O | 375.2059 | -0.46                | Find By Formula |                    |

## Compound Chromatograms

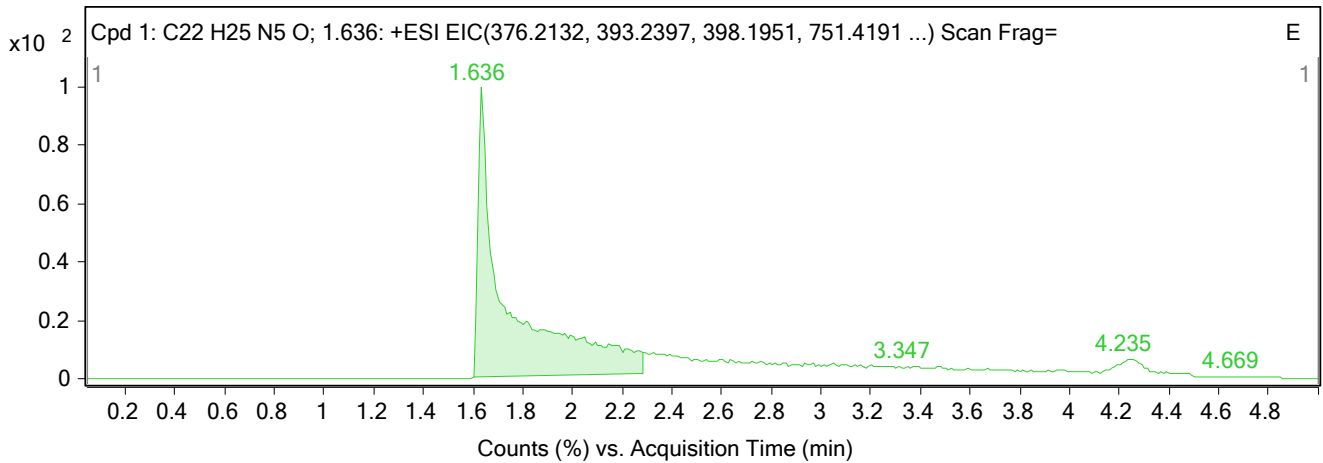

MS Zoomed Spectrum

# Target Compound Screening Report

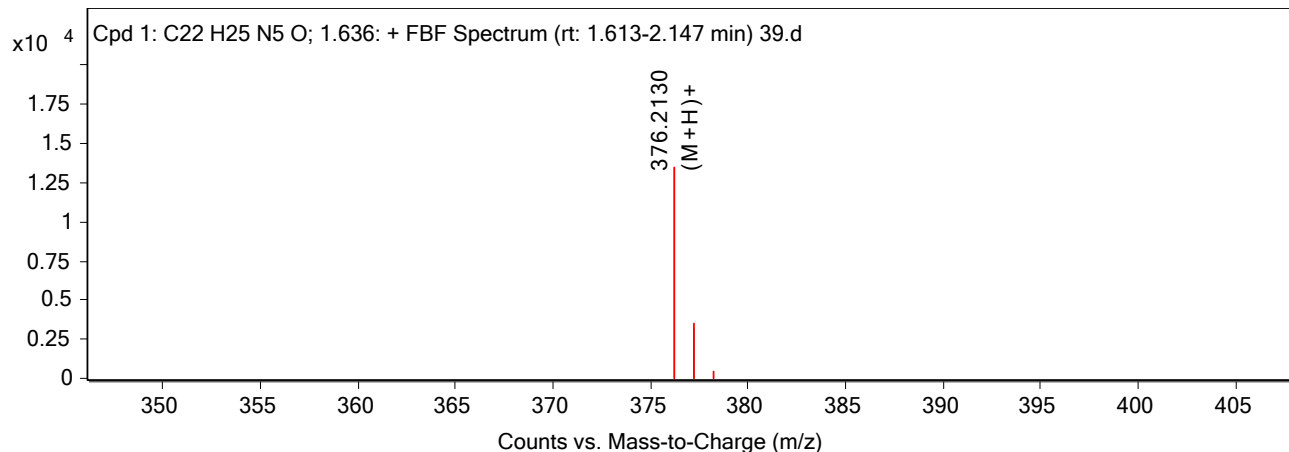

## MS Spectrum Peak List

| Obs. m/z | Charge | Abund    | Ion/Isotope |
|----------|--------|----------|-------------|
| 376.213  | 1      | 13482.71 | (M+H)+      |
| 377.216  | 1      | 3183.78  | (M+H)+      |
| 378.2191 | 1      | 450.68   | (M+H)+      |

## MS Zoomed Spectrum

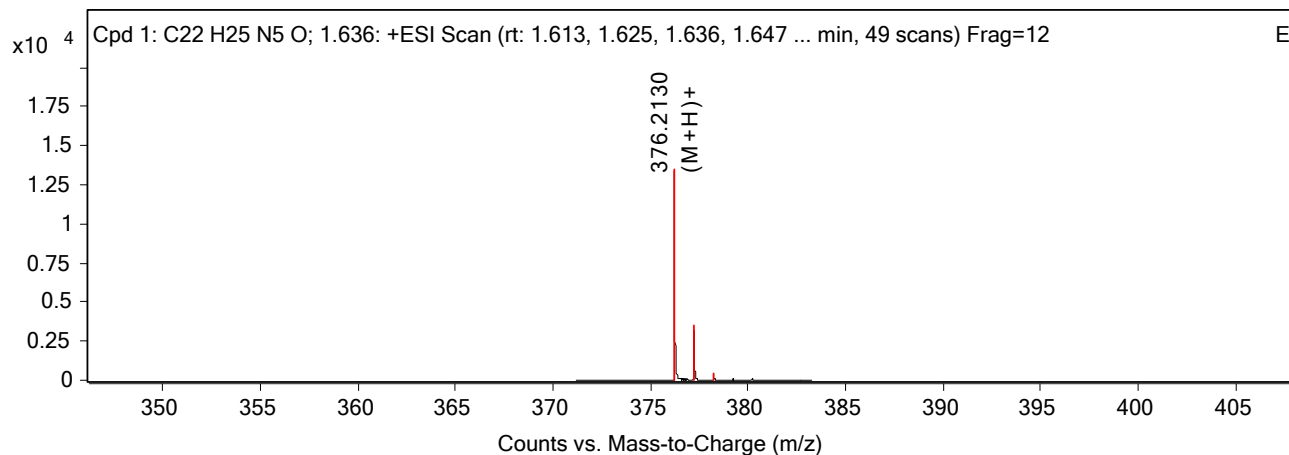

## MS Spectrum Peak List

| Obs. m/z | Charge | Abund    | Ion/Isotope | Tgt Mass Error (ppm) |
|----------|--------|----------|-------------|----------------------|
| 376.213  | 1      | 13482.71 | (M+H)+      | 0.48                 |
| 377.216  | 1      | 3183.78  | (M+H)+      | 0.47                 |
| 378.2191 | 1      | 450.68   | (M+H)+      | -0.28                |

--- End Of Report ---

# Target Compound Screening Report

|                                 |                                        |                               |                                                     |
|---------------------------------|----------------------------------------|-------------------------------|-----------------------------------------------------|
| <b>Data File</b>                | 41.d                                   | <b>Sample Name</b>            | H2055735                                            |
| <b>Sample Type</b>              | Sample                                 | <b>Position</b>               | P1-E5                                               |
| <b>Instrument Name</b>          | Instrument 1                           | <b>User Name</b>              | Denis V.Bylina                                      |
| <b>Acq Method</b>               | Fast_Gradient_HRMS_pos_Lock_08272019.m | <b>Acquired Time</b>          | 9/23/2021 2:58:46 PM (UTC+03:00)                    |
| <b>IRM Calibration Status</b>   | Success                                | <b>DA Method</b>              | 1.m                                                 |
| <b>Comment</b>                  |                                        |                               |                                                     |
| <b>Sample Group</b>             |                                        | <b>Info.</b>                  | Agilent 6224 TOF LC/MS                              |
| <b>MFC</b>                      | C22H21BrF2N2O2                         | <b>Stream Name</b>            | LC 1                                                |
| <b>Acquisition Time (Local)</b> | 9/23/2021 2:58:46 PM (UTC+03:00)       | <b>Acquisition SW Version</b> | 6200 series TOF/6500 series Q-TOF B.08.00 (B8058.0) |
| <b>TOF Driver Version</b>       | 8.00.00                                | <b>TOF Firmware Version</b>   | 8.643                                               |
| <b>Tune Mass Range Max.</b>     | 1700                                   |                               |                                                     |

## Compound Table

| Label                                | Tgt Score | Mass Error (ppm) | Tgt Formula         | Obs. RT | Ref. Mass | Obs. Mass |
|--------------------------------------|-----------|------------------|---------------------|---------|-----------|-----------|
| Cpd 1: C22 H21 Br F2 N2 O2;<br>3.496 | 98.65     | -1.09            | C22 H21 Br F2 N2 O2 | 3.496   | 462.0754  | 462.0749  |

| Obs. m/z | Obs. RT | Obs. Mass | Tgt Formula         | Tgt Mass | Tgt Mass Error (ppm) | RT Diff.        | Find Cpd Algorithm |
|----------|---------|-----------|---------------------|----------|----------------------|-----------------|--------------------|
| 480.1085 | 3.496   | 462.0749  | C22 H21 Br F2 N2 O2 | 462.0754 | -1.09                | Find By Formula |                    |

## Compound Chromatograms

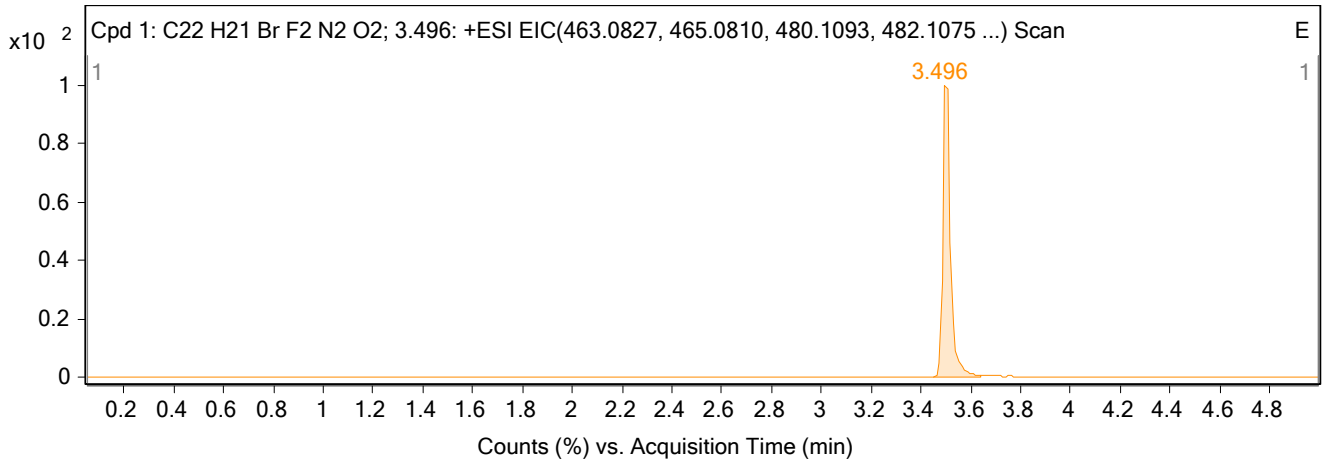

MS Zoomed Spectrum

# Target Compound Screening Report

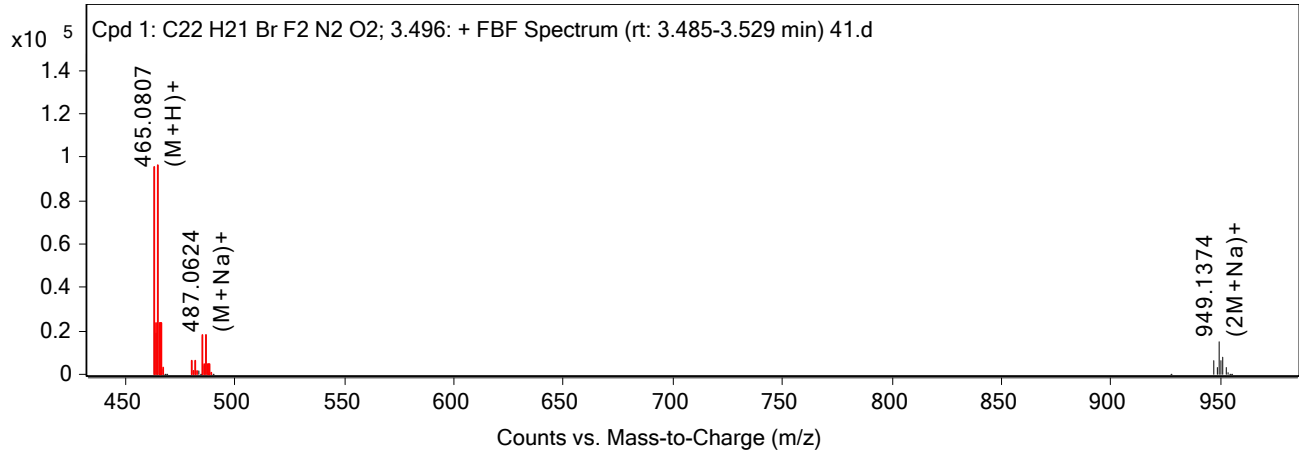

## MS Spectrum Peak List

| Obs. m/z | Charge | Abund    | Ion/Isotope |
|----------|--------|----------|-------------|
| 463.0825 | 1      | 95661.08 | (M+H)+      |
| 464.0853 | 1      | 19336.82 | (M+H)+      |
| 465.0807 | 1      | 96250.91 | (M+H)+      |
| 466.0835 | 1      | 19235.23 | (M+H)+      |
| 485.0643 | 1      | 17581.22 | (M+Na)+     |
| 487.0624 | 1      | 17974.75 | (M+Na)+     |
| 947.1382 | 1      | 6660.32  | (2M+Na)+    |
| 949.1374 | 1      | 15211.95 | (2M+Na)+    |
| 950.1403 | 1      | 6763.01  | (2M+Na)+    |
| 951.1362 | 1      | 8327.4   | (2M+Na)+    |

## MS Zoomed Spectrum

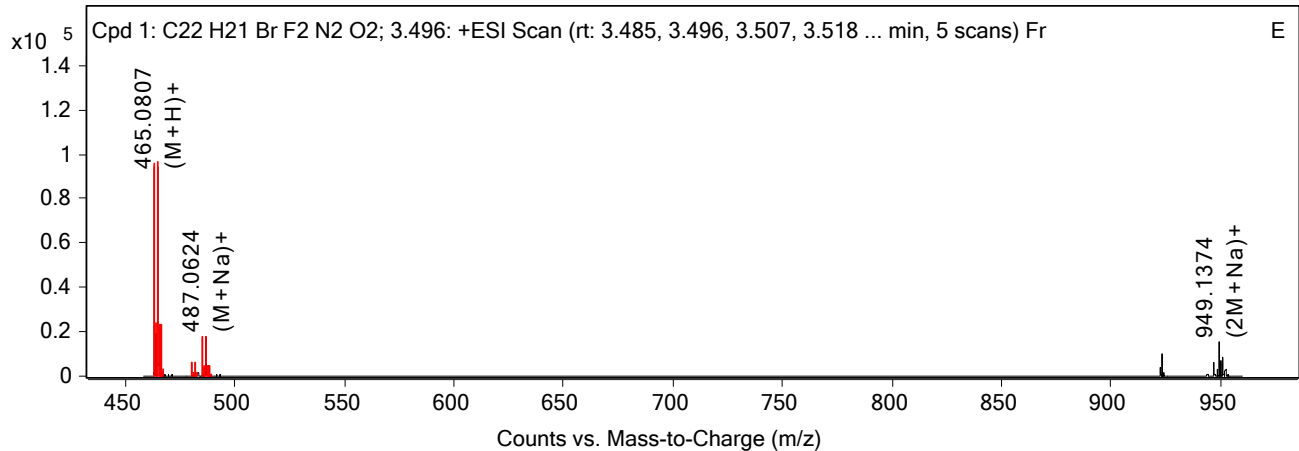

## MS Spectrum Peak List

| Obs. m/z | Charge | Abund    | Ion/Isotope | Tgt Mass Error (ppm) |
|----------|--------|----------|-------------|----------------------|
| 463.0825 | 1      | 95661.08 | (M+H)+      | 0.56                 |
| 464.0853 | 1      | 19336.82 | (M+H)+      | 1.28                 |
| 465.0807 | 1      | 96250.91 | (M+H)+      | 0.44                 |
| 466.0835 | 1      | 19235.23 | (M+H)+      | 0.96                 |
| 485.0643 | 1      | 17581.22 | (M+Na)+     | 0.74                 |
| 487.0624 | 1      | 17974.75 | (M+Na)+     | 0.93                 |
| 947.1382 | 1      | 6660.32  | (2M+Na)+    | 2.07                 |
| 949.1374 | 1      | 15211.95 | (2M+Na)+    | 1.22                 |
| 950.1403 | 1      | 6763.01  | (2M+Na)+    | 1.2                  |
| 951.1362 | 1      | 8327.4   | (2M+Na)+    | 1.73                 |

--- End Of Report ---

# Target Compound Screening Report

|                                 |                                        |                               |                                                     |
|---------------------------------|----------------------------------------|-------------------------------|-----------------------------------------------------|
| <b>Data File</b>                | 31.d                                   | <b>Sample Name</b>            | H2993319                                            |
| <b>Sample Type</b>              | Sample                                 | <b>Position</b>               | P1-D4                                               |
| <b>Instrument Name</b>          | Instrument 1                           | <b>User Name</b>              | Denis V.Bylina                                      |
| <b>Acq Method</b>               | Fast_Gradient_HRMS_pos_Lock_08272019.m | <b>Acquired Time</b>          | 9/23/2021 2:03:14 PM (UTC+03:00)                    |
| <b>IRM Calibration Status</b>   | Success                                | <b>DA Method</b>              | 1.m                                                 |
| <b>Comment</b>                  |                                        |                               |                                                     |
| <b>Sample Group</b>             |                                        | <b>Info.</b>                  | Agilent 6224 TOF LC/MS                              |
| <b>MFC</b>                      | C25H27N5O3                             | <b>Stream Name</b>            | LC 1                                                |
| <b>Acquisition Time (Local)</b> | 9/23/2021 2:03:14 PM (UTC+03:00)       | <b>Acquisition SW Version</b> | 6200 series TOF/6500 series Q-TOF B.08.00 (B8058.0) |
| <b>TOF Driver Version</b>       | 8.00.00                                | <b>TOF Firmware Version</b>   | 8.643                                               |
| <b>Tune Mass Range Max.</b>     | 1700                                   |                               |                                                     |

## Compound Table

| Label                       | Tgt Score | Mass Error (ppm) | Tgt Formula   | Obs. RT | Ref. Mass | Obs. Mass |
|-----------------------------|-----------|------------------|---------------|---------|-----------|-----------|
| Cpd 1: C25 H27 N5 O3; 2.679 | 98.39     | -0.74            | C25 H27 N5 O3 | 2.679   | 445.2114  | 445.2111  |

| Obs. m/z | Obs. RT | Obs. Mass | Tgt Formula   | Tgt Mass | Tgt Mass Error (ppm) | RT Diff.        | Find Cpd Algorithm |
|----------|---------|-----------|---------------|----------|----------------------|-----------------|--------------------|
| 468.1995 | 2.679   | 445.2111  | C25 H27 N5 O3 | 445.2114 | -0.74                | Find By Formula |                    |

## Compound Chromatograms

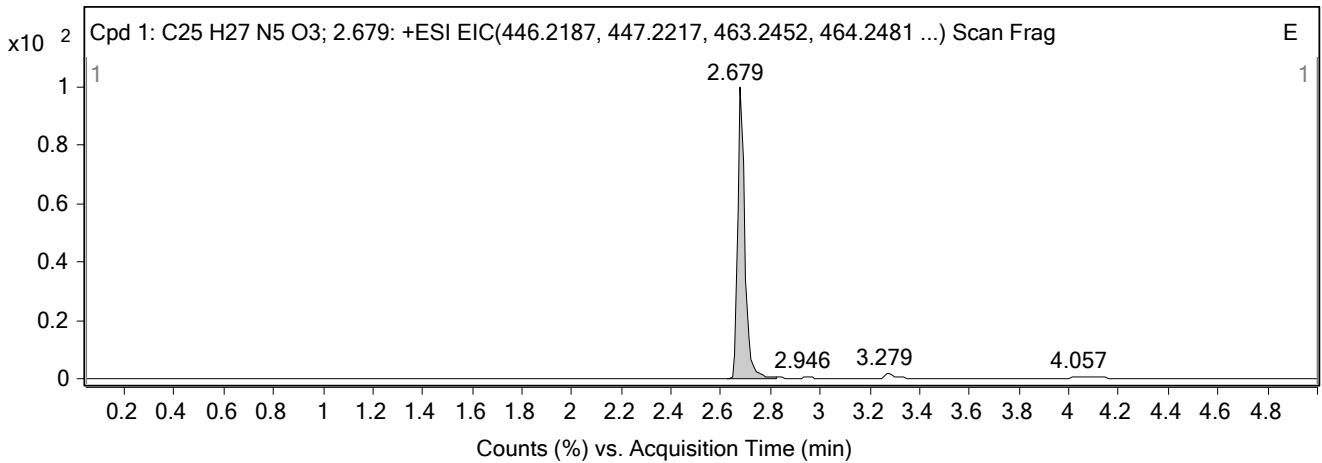

MS Zoomed Spectrum

# Target Compound Screening Report

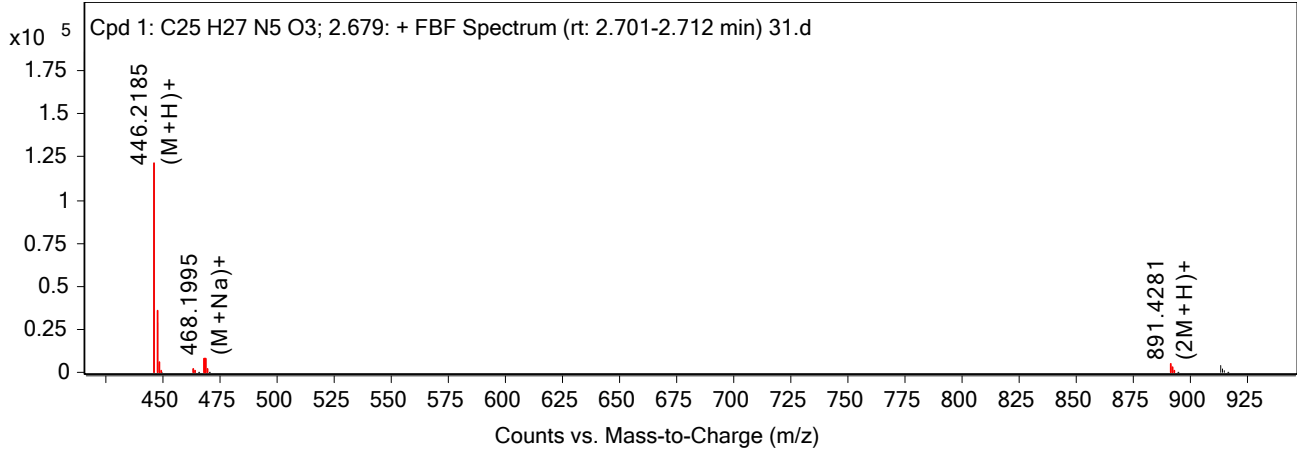

## MS Spectrum Peak List

| Obs. m/z | Charge | Abund     | Ion/Isotope           |
|----------|--------|-----------|-----------------------|
| 446.2185 | 1      | 121327.05 | (M+H)+                |
| 447.2215 | 1      | 29422.94  | (M+H)+                |
| 448.2238 | 1      | 4552.7    | (M+H)+                |
| 463.2454 | 1      | 1940.01   | (M+NH <sub>4</sub> )+ |
| 468.1995 | 1      | 7803.28   | (M+Na)+               |
| 469.2023 | 1      | 2275.27   | (M+Na)+               |
| 891.4281 | 1      | 4480.26   | (2M+H)+               |
| 892.4305 | 1      | 2783.43   | (2M+H)+               |
| 913.4101 | 1      | 3938.07   | (2M+Na)+              |
| 914.4136 | 1      | 2408.93   | (2M+Na)+              |

## MS Zoomed Spectrum

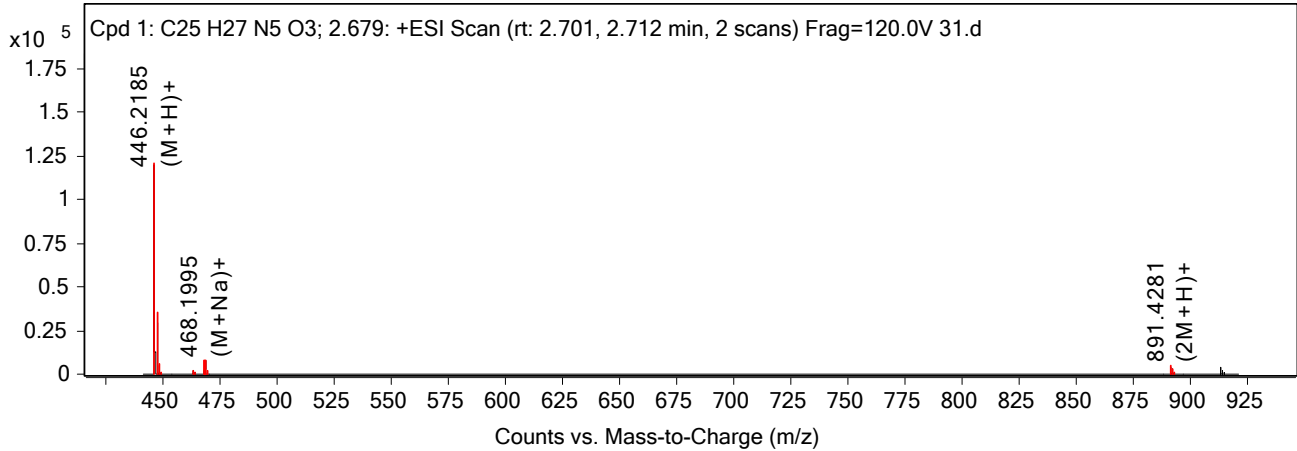

## MS Spectrum Peak List

| Obs. m/z | Charge | Abund     | Ion/Isotope           | Tgt Mass Error (ppm) |
|----------|--------|-----------|-----------------------|----------------------|
| 446.2185 | 1      | 121327.05 | (M+H)+                | 0.36                 |
| 447.2215 | 1      | 29422.94  | (M+H)+                | 0.4                  |
| 448.2238 | 1      | 4552.7    | (M+H)+                | 1.4                  |
| 463.2454 | 1      | 1940.01   | (M+NH <sub>4</sub> )+ | -0.32                |
| 468.1995 | 1      | 7803.28   | (M+Na)+               | 2.36                 |
| 469.2023 | 1      | 2275.27   | (M+Na)+               | 2.8                  |
| 891.4281 | 1      | 4480.26   | (2M+H)+               | 2.16                 |
| 892.4305 | 1      | 2783.43   | (2M+H)+               | 2.9                  |
| 913.4101 | 1      | 3938.07   | (2M+Na)+              | 2.13                 |
| 914.4136 | 1      | 2408.93   | (2M+Na)+              | 1.55                 |

--- End Of Report ---



# Target Compound Screening Report

|                                 |                                        |                               |                                                     |
|---------------------------------|----------------------------------------|-------------------------------|-----------------------------------------------------|
| <b>Data File</b>                | 33.d                                   | <b>Sample Name</b>            | H2371467                                            |
| <b>Sample Type</b>              | Sample                                 | <b>Position</b>               | P1-D6                                               |
| <b>Instrument Name</b>          | Instrument 1                           | <b>User Name</b>              | Denis V.Bylina                                      |
| <b>Acq Method</b>               | Fast_Gradient_HRMS_pos_Lock_08272019.m | <b>Acquired Time</b>          | 9/23/2021 9:51:13 PM (UTC+03:00)                    |
| <b>IRM Calibration Status</b>   | Success                                | <b>DA Method</b>              | 1.m                                                 |
| <b>Comment</b>                  |                                        |                               |                                                     |
| <b>Sample Group</b>             |                                        | <b>Info.</b>                  | Agilent 6224 TOF LC/MS                              |
| <b>MFC</b>                      | C23H35N3O4S                            | <b>Stream Name</b>            | LC 1                                                |
| <b>Acquisition Time (Local)</b> | 9/23/2021 9:51:13 PM (UTC+03:00)       | <b>Acquisition SW Version</b> | 6200 series TOF/6500 series Q-TOF B.08.00 (B8058.0) |
| <b>TOF Driver Version</b>       | 8.00.00                                | <b>TOF Firmware Version</b>   | 8.643                                               |
| <b>Tune Mass Range Max.</b>     | 1700                                   |                               |                                                     |

## Compound Table

| Label                         | Tgt Score | Mass Error (ppm) | Tgt Formula     | Obs. RT | Ref. Mass | Obs. Mass |
|-------------------------------|-----------|------------------|-----------------|---------|-----------|-----------|
| Cpd 1: C23 H35 N3 O4 S; 3.142 | 94.7      | -1.45            | C23 H35 N3 O4 S | 3.142   | 449.2348  | 449.2342  |

| Obs. m/z | Obs. RT | Obs. Mass | Tgt Formula     | Tgt Mass | Tgt Mass Error (ppm) | RT Diff.        | Find Cpds Algorithm |
|----------|---------|-----------|-----------------|----------|----------------------|-----------------|---------------------|
| 921.4577 | 3.142   | 449.2342  | C23 H35 N3 O4 S | 449.2348 | -1.45                | Find By Formula |                     |

## Compound Chromatograms

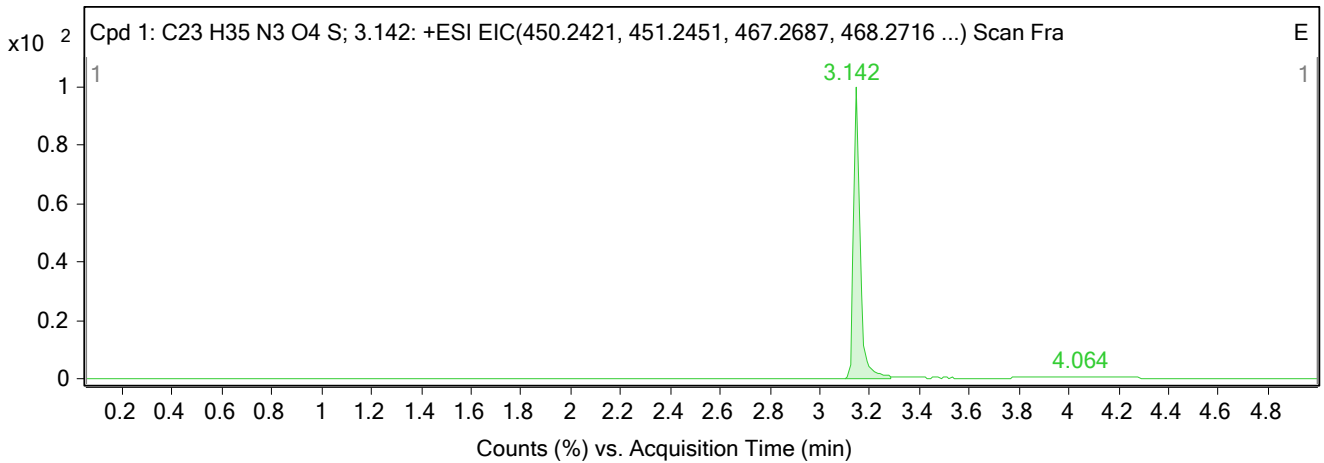

MS Zoomed Spectrum

# Target Compound Screening Report

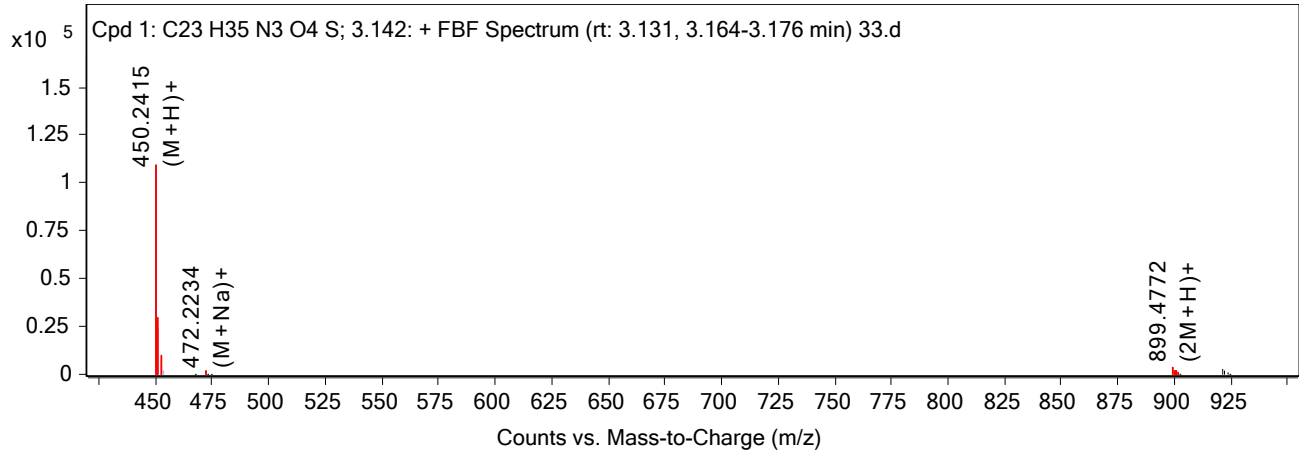

## MS Spectrum Peak List

| Obs. m/z | Charge | Abund     | Ion/Isotope |
|----------|--------|-----------|-------------|
| 450.2415 | 1      | 109077.75 | (M+H)+      |
| 451.2447 | 1      | 23920.62  | (M+H)+      |
| 452.2422 | 1      | 6867.6    | (M+H)+      |
| 472.2234 | 1      | 1495.51   | (M+Na)+     |
| 899.4772 | 1      | 3723.46   | (2M+H)+     |
| 900.4768 | 1      | 2180.31   | (2M+H)+     |
| 901.4786 | 1      | 833.61    | (2M+H)+     |
| 921.4577 | 1      | 2949.56   | (2M+Na)+    |
| 922.4607 | 1      | 1879.11   | (2M+Na)+    |
| 923.4594 | 1      | 907.71    | (2M+Na)+    |

## MS Zoomed Spectrum

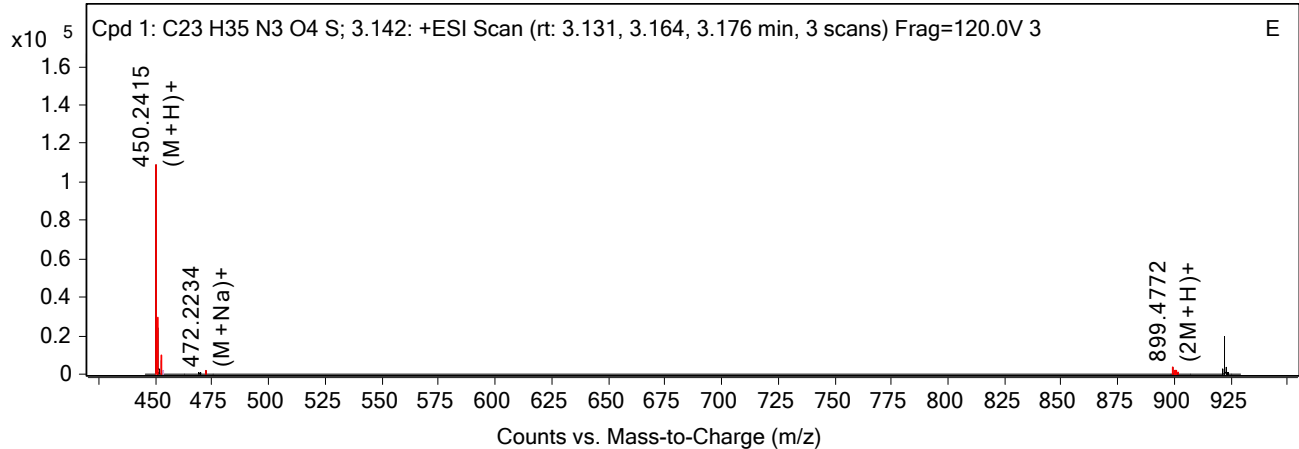

## MS Spectrum Peak List

| Obs. m/z | Charge | Abund     | Ion/Isotope | Tgt Mass Error (ppm) |
|----------|--------|-----------|-------------|----------------------|
| 450.2415 | 1      | 109077.75 | (M+H)+      | 1.42                 |
| 451.2447 | 1      | 23920.62  | (M+H)+      | 0.87                 |
| 452.2422 | 1      | 6867.6    | (M+H)+      | 1.49                 |
| 472.2234 | 1      | 1495.51   | (M+Na)+     | 1.47                 |
| 899.4772 | 1      | 3723.46   | (2M+H)+     | -0.32                |
| 900.4768 | 1      | 2180.31   | (2M+H)+     | 3.55                 |
| 901.4786 | 1      | 833.61    | (2M+H)+     | 0.74                 |
| 921.4577 | 1      | 2949.56   | (2M+Na)+    | 1.33                 |
| 922.4607 | 1      | 1879.11   | (2M+Na)+    | 1.32                 |
| 923.4594 | 1      | 907.71    | (2M+Na)+    | 1.89                 |

--- End Of Report ---

# Target Compound Screening Report

|                                 |                                        |                               |                                                     |
|---------------------------------|----------------------------------------|-------------------------------|-----------------------------------------------------|
| <b>Data File</b>                | 20.d                                   | <b>Sample Name</b>            | H2047760                                            |
| <b>Sample Type</b>              | Sample                                 | <b>Position</b>               | P1-C2                                               |
| <b>Instrument Name</b>          | Instrument 1                           | <b>User Name</b>              | Denis V.Bylina                                      |
| <b>Acq Method</b>               | Fast_Gradient_HRMS_pos_Lock_08272019.m | <b>Acquired Time</b>          | 9/23/2021 1:02:07 PM (UTC+03:00)                    |
| <b>IRM Calibration Status</b>   | Success                                | <b>DA Method</b>              | 1.m                                                 |
| <b>Comment</b>                  |                                        |                               |                                                     |
| <b>Sample Group</b>             |                                        | <b>Info.</b>                  | Agilent 6224 TOF LC/MS                              |
| <b>MFC</b>                      | C24H30FN3O4S                           | <b>Stream Name</b>            | LC 1                                                |
| <b>Acquisition Time (Local)</b> | 9/23/2021 1:02:07 PM (UTC+03:00)       | <b>Acquisition SW Version</b> | 6200 series TOF/6500 series Q-TOF B.08.00 (B8058.0) |
| <b>TOF Driver Version</b>       | 8.00.00                                | <b>TOF Firmware Version</b>   | 8.643                                               |
| <b>Tune Mass Range Max.</b>     | 1700                                   |                               |                                                     |

## Compound Table

| Label                           | Tgt Score | Mass Error (ppm) | Tgt Formula       | Obs. RT | Ref. Mass | Obs. Mass |
|---------------------------------|-----------|------------------|-------------------|---------|-----------|-----------|
| Cpd 1: C24 H30 F N3 O4 S; 2.905 | 98.96     | -0.51            | C24 H30 F N3 O4 S | 2.905   | 475.1941  | 475.1939  |

| Obs. m/z | Obs. RT | Obs. Mass | Tgt Formula       | Tgt Mass | Tgt Mass Error (ppm) | RT Diff.        | Find Cpds Algorithm |
|----------|---------|-----------|-------------------|----------|----------------------|-----------------|---------------------|
| 951.3954 | 2.905   | 475.1939  | C24 H30 F N3 O4 S | 475.1941 | -0.51                | Find By Formula |                     |

## Compound Chromatograms

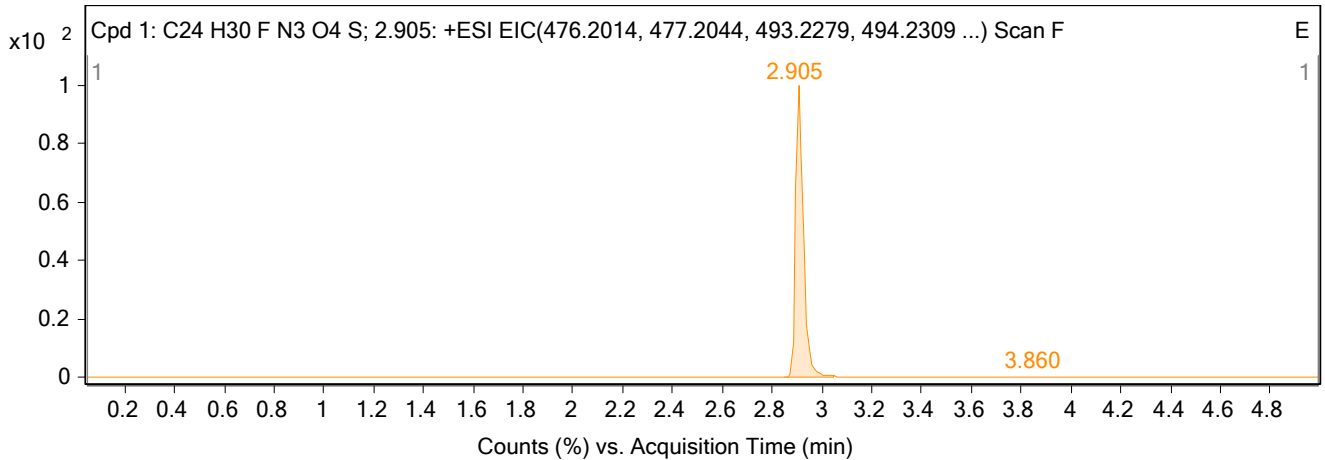

## MS Zoomed Spectrum

# Target Compound Screening Report

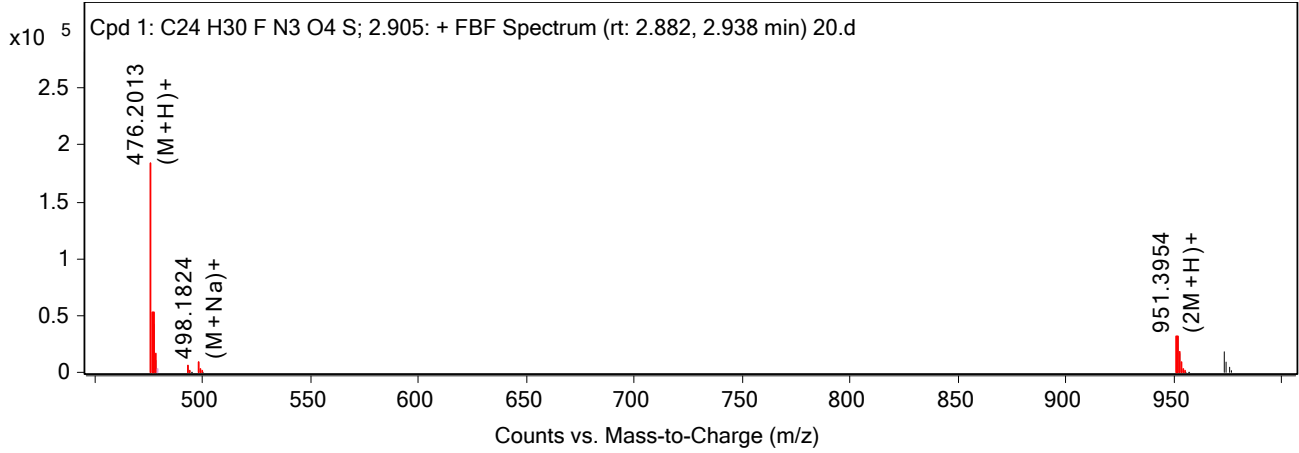

### MS Spectrum Peak List

| Obs. m/z | Charge | Abund     | Ion/Isotope           |
|----------|--------|-----------|-----------------------|
| 476.2013 | 1      | 183757.03 | (M+H)+                |
| 477.2044 | 1      | 42242.05  | (M+H)+                |
| 478.2023 | 1      | 11093.78  | (M+H)+                |
| 493.2275 | 1      | 6156.96   | (M+NH <sub>4</sub> )+ |
| 498.1824 | 1      | 8637.63   | (M+Na)+               |
| 951.3954 | 1      | 31510.93  | (2M+H)+               |
| 952.3983 | 1      | 16768.66  | (2M+H)+               |
| 953.3961 | 1      | 7423.25   | (2M+H)+               |
| 973.377  | 1      | 18011.31  | (2M+Na)+              |
| 974.3802 | 1      | 9275.56   | (2M+Na)+              |

### MS Zoomed Spectrum

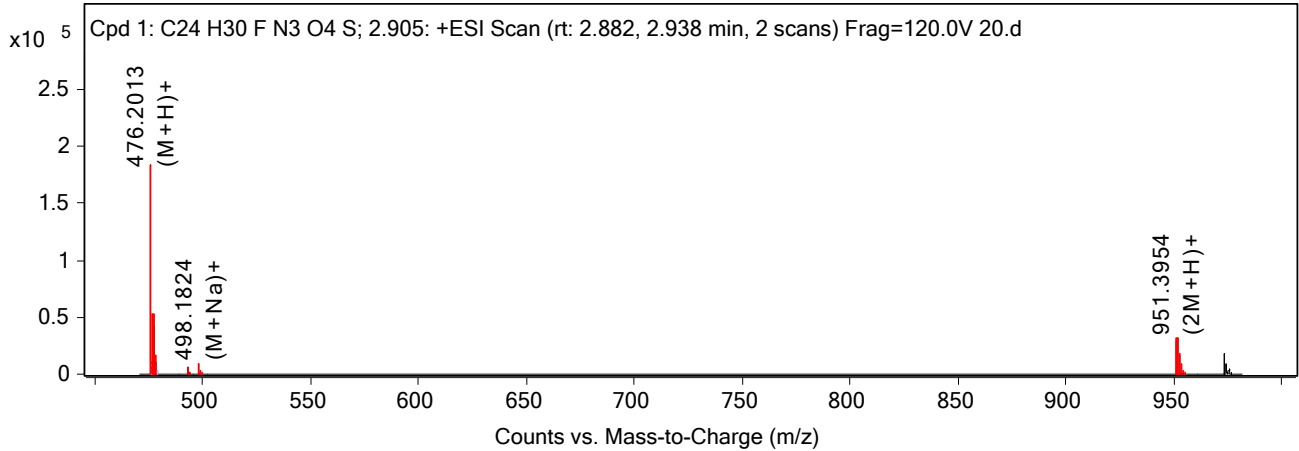

### MS Spectrum Peak List

| Obs. m/z | Charge | Abund     | Ion/Isotope           | Tgt Mass Error (ppm) |
|----------|--------|-----------|-----------------------|----------------------|
| 476.2013 | 1      | 183757.03 | (M+H)+                | 0.24                 |
| 477.2044 | 1      | 42242.05  | (M+H)+                | 0.11                 |
| 478.2023 | 1      | 11093.78  | (M+H)+                | -0.06                |
| 493.2275 | 1      | 6156.96   | (M+NH <sub>4</sub> )+ | 0.8                  |
| 498.1824 | 1      | 8637.63   | (M+Na)+               | 1.78                 |
| 951.3954 | 1      | 31510.93  | (2M+H)+               | 0.06                 |
| 952.3983 | 1      | 16768.66  | (2M+H)+               | 0.19                 |
| 953.3961 | 1      | 7423.25   | (2M+H)+               | 1.9                  |
| 973.377  | 1      | 18011.31  | (2M+Na)+              | 0.49                 |
| 974.3802 | 1      | 9275.56   | (2M+Na)+              | 0.29                 |

--- End Of Report ---

# Target Compound Screening Report

|                                 |                                        |                               |                                                     |
|---------------------------------|----------------------------------------|-------------------------------|-----------------------------------------------------|
| <b>Data File</b>                | 50.d                                   | <b>Sample Name</b>            | H2046077                                            |
| <b>Sample Type</b>              | Sample                                 | <b>Position</b>               | P1-F5                                               |
| <b>Instrument Name</b>          | Instrument 1                           | <b>User Name</b>              | Denis V.Bylina                                      |
| <b>Acq Method</b>               | Fast_Gradient_HRMS_pos_Lock_08272019.m | <b>Acquired Time</b>          | 9/23/2021 3:48:41 PM (UTC+03:00)                    |
| <b>IRM Calibration Status</b>   | Success                                | <b>DA Method</b>              | 1.m                                                 |
| <b>Comment</b>                  |                                        |                               |                                                     |
| <b>Sample Group</b>             |                                        | <b>Info.</b>                  | Agilent 6224 TOF LC/MS                              |
| <b>MFC</b>                      | C23H25N3O4S2                           | <b>Stream Name</b>            | LC 1                                                |
| <b>Acquisition Time (Local)</b> | 9/23/2021 3:48:41 PM (UTC+03:00)       | <b>Acquisition SW Version</b> | 6200 series TOF/6500 series Q-TOF B.08.00 (B8058.0) |
| <b>TOF Driver Version</b>       | 8.00.00                                | <b>TOF Firmware Version</b>   | 8.643                                               |
| <b>Tune Mass Range Max.</b>     | 1700                                   |                               |                                                     |

## Compound Table

| Label                          | Tgt Score | Mass Error (ppm) | Tgt Formula      | Obs. RT | Ref. Mass | Obs. Mass |
|--------------------------------|-----------|------------------|------------------|---------|-----------|-----------|
| Cpd 1: C23 H25 N3 O4 S2; 2.814 | 94.48     | -0.69            | C23 H25 N3 O4 S2 | 2.814   | 471.1286  | 471.1283  |

| Obs. m/z | Obs. RT | Obs. Mass | Tgt Formula      | Tgt Mass | Tgt Mass Error (ppm) | RT Diff.        | Find Cpds Algorithm |
|----------|---------|-----------|------------------|----------|----------------------|-----------------|---------------------|
| 472.1357 | 2.814   | 471.1283  | C23 H25 N3 O4 S2 | 471.1286 | -0.69                | Find By Formula |                     |

## Compound Chromatograms

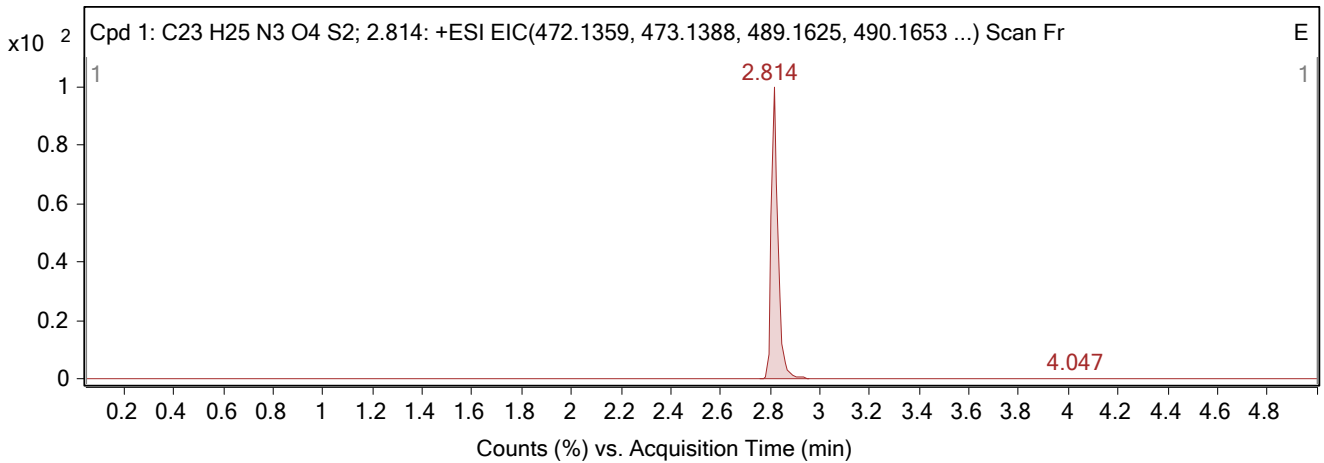

## MS Zoomed Spectrum

# Target Compound Screening Report

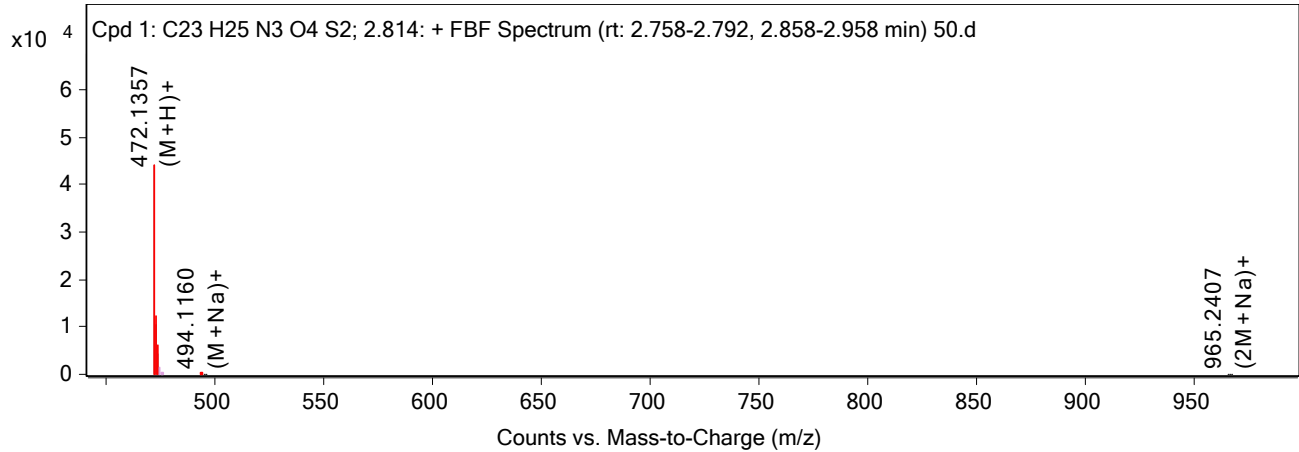

### MS Spectrum Peak List

| Obs. m/z | Charge | Abund    | Ion/Isotope |
|----------|--------|----------|-------------|
| 472.1357 | 1      | 44067.86 | (M+H)+      |
| 473.1382 | 1      | 10352.43 | (M+H)+      |
| 474.1348 | 1      | 4278.93  | (M+H)+      |
| 494.116  | 1      | 262.46   | (M+Na)+     |
| 495.1256 | 1      | 73.94    | (M+Na)+     |
| 496.1186 | 1      | 36.66    | (M+Na)+     |
| 965.2407 | 1      | 88.1     | (2M+Na)+    |
| 966.2558 | 1      | 50.06    | (2M+Na)+    |
| 967.2301 | 1      | 34.63    | (2M+Na)+    |

### MS Zoomed Spectrum

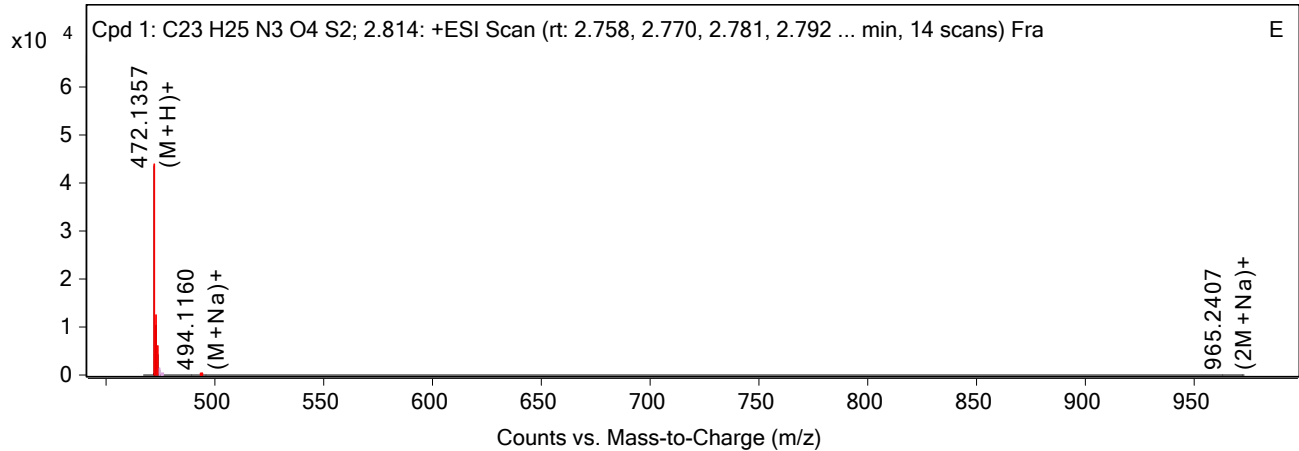

### MS Spectrum Peak List

| Obs. m/z | Charge | Abund    | Ion/Isotope | Tgt Mass Error (ppm) |
|----------|--------|----------|-------------|----------------------|
| 472.1357 | 1      | 44067.86 | (M+H)+      | 0.51                 |
| 473.1382 | 1      | 10352.43 | (M+H)+      | 1.38                 |
| 474.1348 | 1      | 4278.93  | (M+H)+      | 0.57                 |
| 494.116  | 1      | 262.46   | (M+Na)+     | 3.83                 |
| 495.1256 | 1      | 73.94    | (M+Na)+     | -9.7                 |
| 496.1186 | 1      | 36.66    | (M+Na)+     | -3.35                |
| 965.2407 | 1      | 88.1     | (2M+Na)+    | 5.99                 |
| 966.2558 | 1      | 50.06    | (2M+Na)+    | -6.55                |
| 967.2301 | 1      | 34.63    | (2M+Na)+    | 17.58                |

--- End Of Report ---

# Target Compound Screening Report

|                                 |                                        |                               |                                                     |
|---------------------------------|----------------------------------------|-------------------------------|-----------------------------------------------------|
| <b>Data File</b>                | 19.d                                   | <b>Sample Name</b>            | H2046366                                            |
| <b>Sample Type</b>              | Sample                                 | <b>Position</b>               | P1-C1                                               |
| <b>Instrument Name</b>          | Instrument 1                           | <b>User Name</b>              | Denis V.Bylina                                      |
| <b>Acq Method</b>               | Fast_Gradient_HRMS_pos_Lock_08272019.m | <b>Acquired Time</b>          | 9/23/2021 12:56:34 PM (UTC+03:00)                   |
| <b>IRM Calibration Status</b>   | Success                                | <b>DA Method</b>              | 1.m                                                 |
| <b>Comment</b>                  |                                        |                               |                                                     |
| <b>Sample Group</b>             |                                        | <b>Info.</b>                  | Agilent 6224 TOF LC/MS                              |
| <b>MFC</b>                      | C26H27N3O3S                            | <b>Stream Name</b>            | LC 1                                                |
| <b>Acquisition Time (Local)</b> | 9/23/2021 12:56:34 PM (UTC+03:00)      | <b>Acquisition SW Version</b> | 6200 series TOF/6500 series Q-TOF B.08.00 (B8058.0) |
| <b>TOF Driver Version</b>       | 8.00.00                                | <b>TOF Firmware Version</b>   | 8.643                                               |
| <b>Tune Mass Range Max.</b>     | 1700                                   |                               |                                                     |

## Compound Table

| Label                         | Tgt Score | Mass Error (ppm) | Tgt Formula     | Obs. RT | Ref. Mass | Obs. Mass |
|-------------------------------|-----------|------------------|-----------------|---------|-----------|-----------|
| Cpd 1: C26 H27 N3 O3 S; 2.788 | 94.16     | -0.3             | C26 H27 N3 O3 S | 2.788   | 461.1773  | 461.1772  |

| Obs. m/z | Obs. RT | Obs. Mass | Tgt Formula     | Tgt Mass | Tgt Mass Error (ppm) | RT Diff.        | Find Cpds Algorithm |
|----------|---------|-----------|-----------------|----------|----------------------|-----------------|---------------------|
| 462.1845 | 2.788   | 461.1772  | C26 H27 N3 O3 S | 461.1773 | -0.3                 | Find By Formula |                     |

## Compound Chromatograms

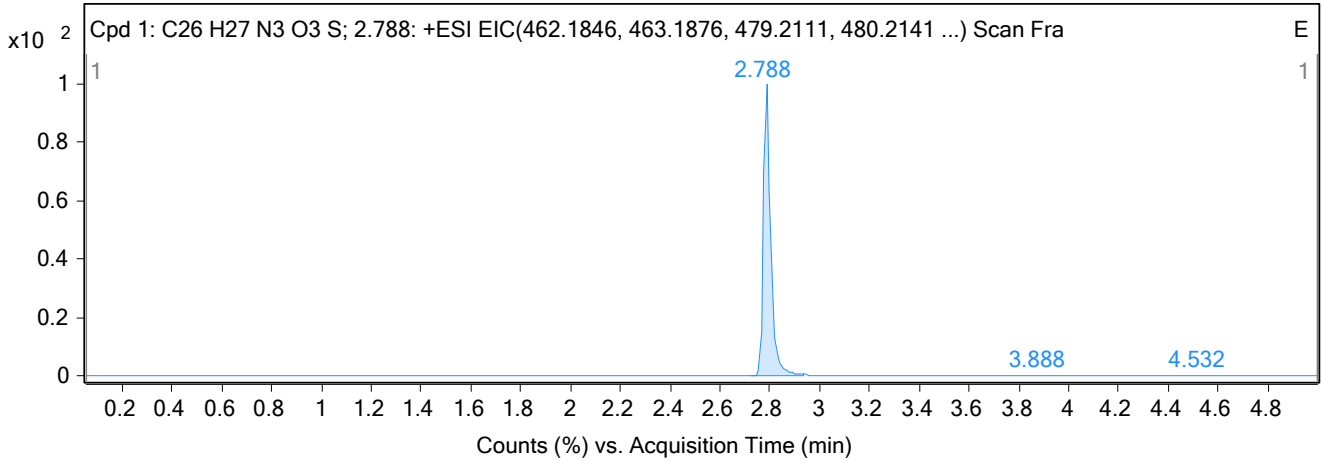

MS Zoomed Spectrum

# Target Compound Screening Report

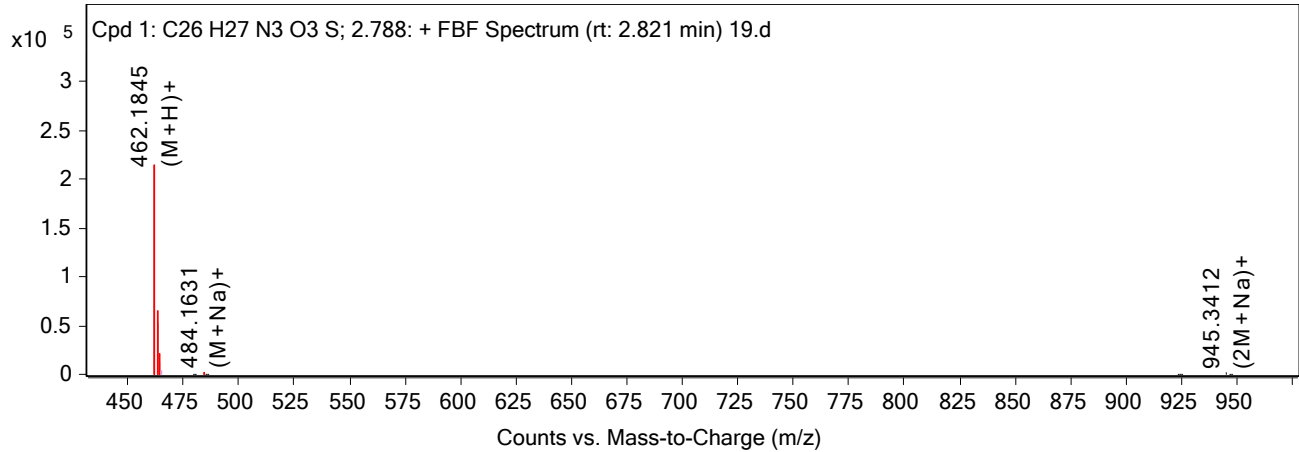

## MS Spectrum Peak List

| Obs. m/z | Charge | Abund     | Ion/Isotope |
|----------|--------|-----------|-------------|
| 462.1845 | 1      | 213768.16 | (M+H)+      |
| 463.1873 | 1      | 52947     | (M+H)+      |
| 464.1869 | 1      | 13057.43  | (M+H)+      |
| 484.1631 | 1      | 2486.48   | (M+Na)+     |
| 485.1707 | 1      | 749.21    | (M+Na)+     |
| 923.3571 | 1      | 773.71    | (2M+H)+     |
| 924.364  | 1      | 346.76    | (2M+H)+     |
| 945.3412 | 1      | 1074.07   | (2M+Na)+    |
| 946.3448 | 1      | 862       | (2M+Na)+    |
| 947.3494 | 1      | 354.9     | (2M+Na)+    |

## MS Zoomed Spectrum

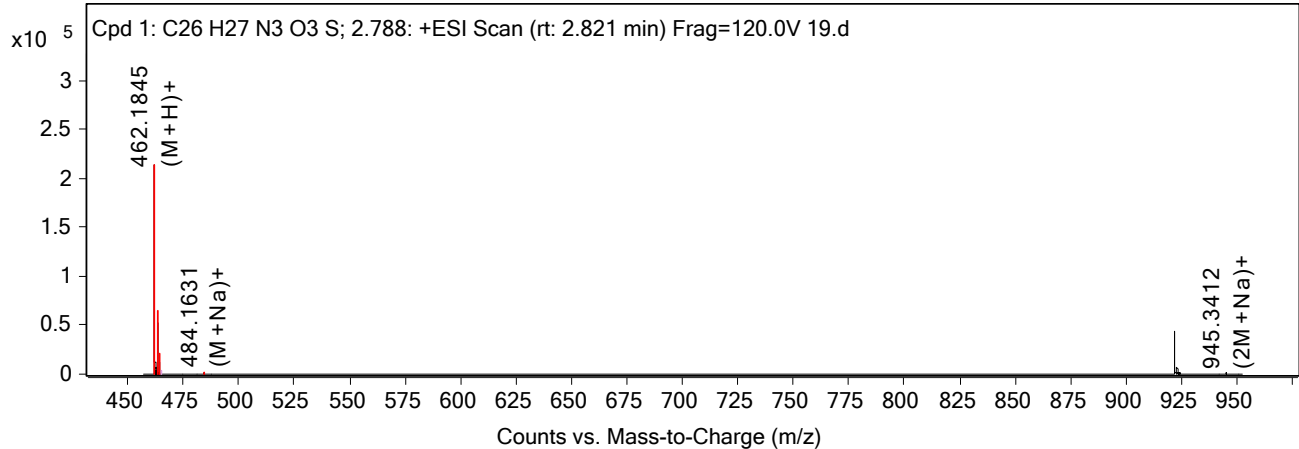

## MS Spectrum Peak List

| Obs. m/z | Charge | Abund     | Ion/Isotope | Tgt Mass Error (ppm) |
|----------|--------|-----------|-------------|----------------------|
| 462.1845 | 1      | 213768.16 | (M+H)+      | 0.21                 |
| 463.1873 | 1      | 52947     | (M+H)+      | 0.74                 |
| 464.1869 | 1      | 13057.43  | (M+H)+      | -2.42                |
| 484.1631 | 1      | 2486.48   | (M+Na)+     | 7.03                 |
| 485.1707 | 1      | 749.21    | (M+Na)+     | -2.2                 |
| 923.3571 | 1      | 773.71    | (2M+H)+     | 5.16                 |
| 924.364  | 1      | 346.76    | (2M+H)+     | 1.05                 |
| 945.3412 | 1      | 1074.07   | (2M+Na)+    | 2.76                 |
| 946.3448 | 1      | 862       | (2M+Na)+    | 2.17                 |
| 947.3494 | 1      | 354.9     | (2M+Na)+    | -2.93                |

--- End Of Report ---



# Target Compound Screening Report

|                                 |                                        |                               |                                                     |
|---------------------------------|----------------------------------------|-------------------------------|-----------------------------------------------------|
| <b>Data File</b>                | 7d.d                                   | <b>Sample Name</b>            | H3460666                                            |
| <b>Sample Type</b>              | Sample                                 | <b>Position</b>               | P1-C7                                               |
| <b>Instrument Name</b>          | Instrument 1                           | <b>User Name</b>              | Denis V.Bylina                                      |
| <b>Acq Method</b>               | Fast_Gradient_HRMS_pos_Lock_08272019.m | <b>Acquired Time</b>          | 10/7/2021 9:46:40 AM (UTC+03:00)                    |
| <b>IRM Calibration Status</b>   | Success                                | <b>DA Method</b>              | 1.m                                                 |
| <b>Comment</b>                  |                                        |                               |                                                     |
| <b>Sample Group</b>             |                                        | <b>Info.</b>                  | Agilent 6224 TOF LC/MS                              |
| <b>MFC</b>                      | C22H33N3O3S                            | <b>Stream Name</b>            | LC 1                                                |
| <b>Acquisition Time (Local)</b> | 10/7/2021 9:46:40 AM (UTC+03:00)       | <b>Acquisition SW Version</b> | 6200 series TOF/6500 series Q-TOF B.08.00 (B8058.0) |
| <b>TOF Driver Version</b>       | 8.00.00                                | <b>TOF Firmware Version</b>   | 8.643                                               |
| <b>Tune Mass Range Max.</b>     | 1700                                   |                               |                                                     |

## Compound Table

| Label                         | Tgt Score | Mass Error (ppm) | Tgt Formula     | Obs. RT | Ref. Mass | Obs. Mass |
|-------------------------------|-----------|------------------|-----------------|---------|-----------|-----------|
| Cpd 1: C22 H33 N3 O3 S; 3.274 | 92.49     | -1.74            | C22 H33 N3 O3 S | 3.274   | 419.2243  | 419.2235  |

| Obs. m/z | Obs. RT | Obs. Mass | Tgt Formula     | Tgt Mass | Tgt Mass Error (ppm) | RT Diff.        | Find Cpds Algorithm |
|----------|---------|-----------|-----------------|----------|----------------------|-----------------|---------------------|
| 420.2308 | 3.274   | 419.2235  | C22 H33 N3 O3 S | 419.2243 | -1.74                | Find By Formula |                     |

## Compound Chromatograms

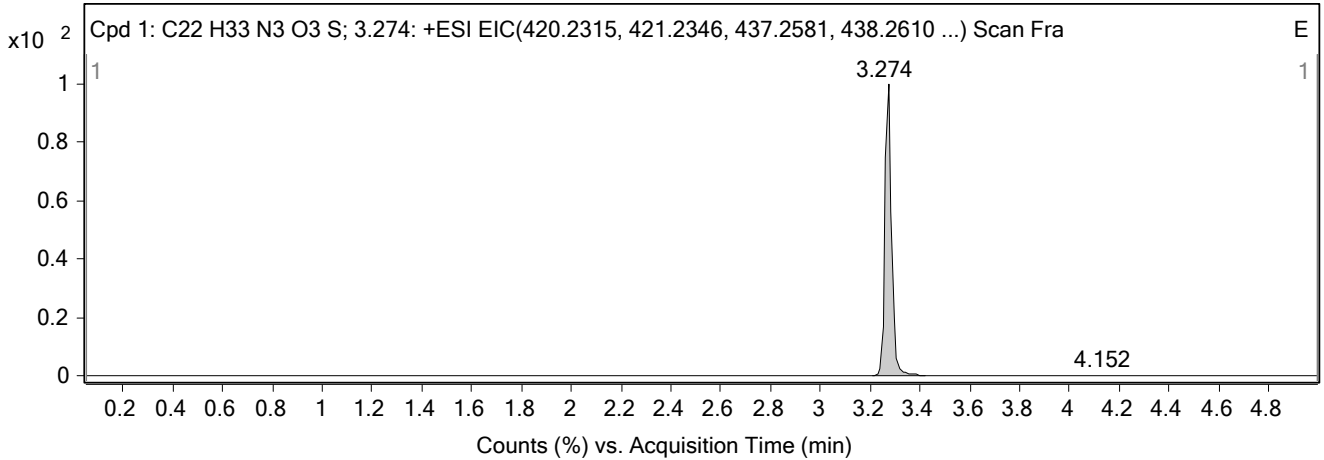

MS Zoomed Spectrum

# Target Compound Screening Report

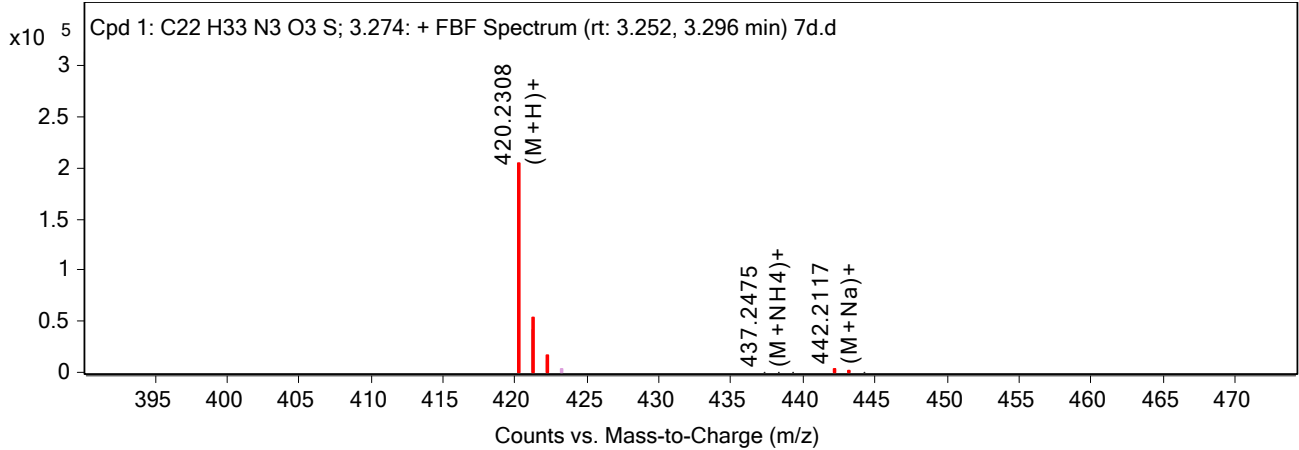

## MS Spectrum Peak List

| Obs. m/z | Charge | Abund     | Ion/Isotope |
|----------|--------|-----------|-------------|
| 420.2308 | 1      | 204366.73 | (M+H)+      |
| 421.2342 | 1      | 41619     | (M+H)+      |
| 422.2315 | 1      | 11469.81  | (M+H)+      |
| 437.2475 | 1      | 326.11    | (M+NH4)+    |
| 438.2338 | 1      | 173.4     | (M+NH4)+    |
| 439.2523 | 1      | 90.66     | (M+NH4)+    |
| 442.2117 | 1      | 3758.43   | (M+Na)+     |
| 443.2173 | 1      | 998.78    | (M+Na)+     |
| 444.2163 | 1      | 321.71    | (M+Na)+     |

## MS Zoomed Spectrum

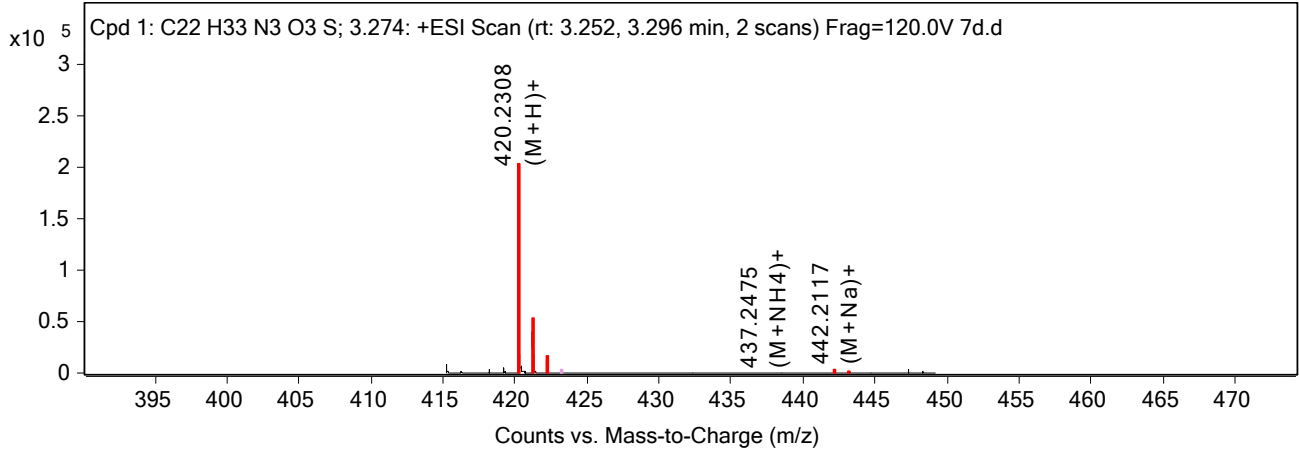

## MS Spectrum Peak List

| Obs. m/z | Charge | Abund     | Ion/Isotope | Tgt Mass Error (ppm) |
|----------|--------|-----------|-------------|----------------------|
| 420.2308 | 1      | 204366.73 | (M+H)+      | 1.83                 |
| 420.2308 |        | 204366.73 |             |                      |
| 421.2342 | 1      | 41619     | (M+H)+      | 0.92                 |
| 422.2315 | 1      | 11469.81  | (M+H)+      | 1.13                 |
| 437.2475 | 1      | 326.11    | (M+NH4)+    | 24.13                |
| 438.2338 | 1      | 173.4     | (M+NH4)+    | 62.07                |
| 439.2523 | 1      | 90.66     | (M+NH4)+    | 14.23                |
| 442.2117 | 1      | 3758.43   | (M+Na)+     | 4.09                 |
| 443.2173 | 1      | 998.78    | (M+Na)+     | -1.83                |
| 444.2163 | 1      | 321.71    | (M+Na)+     | -5.35                |

--- End Of Report ---

# Target Compound Screening Report

|                                 |                                        |                               |                                                     |
|---------------------------------|----------------------------------------|-------------------------------|-----------------------------------------------------|
| <b>Data File</b>                | 2d.d                                   | <b>Sample Name</b>            | H3475358                                            |
| <b>Sample Type</b>              | Sample                                 | <b>Position</b>               | P1-C2                                               |
| <b>Instrument Name</b>          | Instrument 1                           | <b>User Name</b>              | Denis V.Bylina                                      |
| <b>Acq Method</b>               | Fast_Gradient_HRMS_pos_Lock_08272019.m | <b>Acquired Time</b>          | 10/7/2021 9:19:06 AM (UTC+03:00)                    |
| <b>IRM Calibration Status</b>   | Success                                | <b>DA Method</b>              | 1.m                                                 |
| <b>Comment</b>                  |                                        |                               |                                                     |
| <b>Sample Group</b>             |                                        | <b>Info.</b>                  | Agilent 6224 TOF LC/MS                              |
| <b>MFC</b>                      | C22H33N3O5S2                           | <b>Stream Name</b>            | LC 1                                                |
| <b>Acquisition Time (Local)</b> | 10/7/2021 9:19:06 AM (UTC+03:00)       | <b>Acquisition SW Version</b> | 6200 series TOF/6500 series Q-TOF B.08.00 (B8058.0) |
| <b>TOF Driver Version</b>       | 8.00.00                                | <b>TOF Firmware Version</b>   | 8.643                                               |
| <b>Tune Mass Range Max.</b>     | 1700                                   |                               |                                                     |

## Compound Table

| Label                          | Tgt Score | Mass Error (ppm) | Tgt Formula      | Obs. RT | Ref. Mass | Obs. Mass |
|--------------------------------|-----------|------------------|------------------|---------|-----------|-----------|
| Cpd 1: C22 H33 N3 O5 S2; 3.349 | 94.01     | -1.64            | C22 H33 N3 O5 S2 | 3.349   | 483.1862  | 483.1854  |

| Obs. m/z | Obs. RT | Obs. Mass | Tgt Formula      | Tgt Mass | Tgt Mass Error (ppm) | RT Diff.        | Find Cpd Algorithm |
|----------|---------|-----------|------------------|----------|----------------------|-----------------|--------------------|
| 484.1927 | 3.349   | 483.1854  | C22 H33 N3 O5 S2 | 483.1862 | -1.64                | Find By Formula |                    |

## Compound Chromatograms

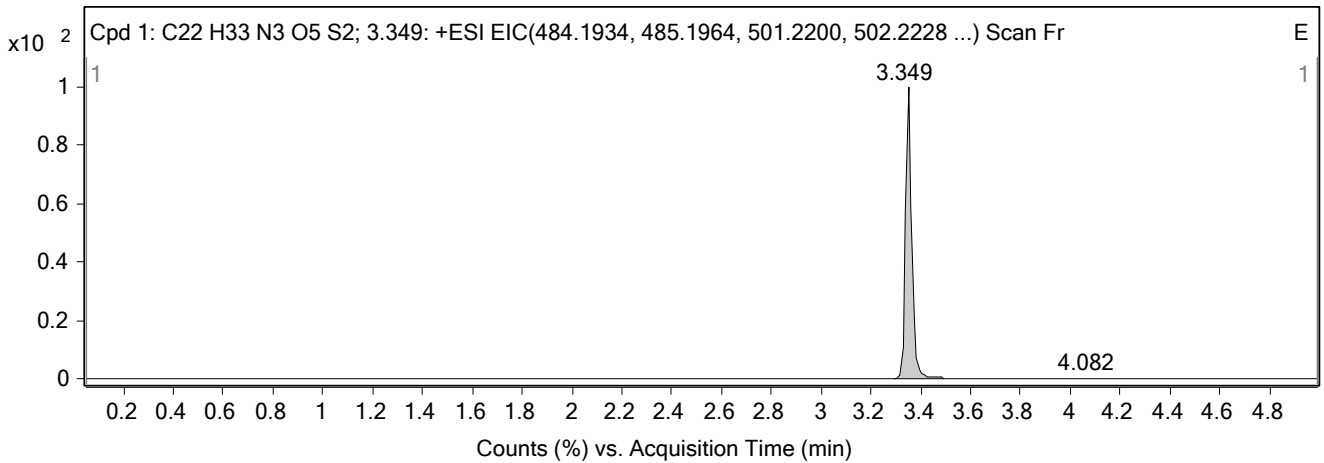

MS Zoomed Spectrum

# Target Compound Screening Report

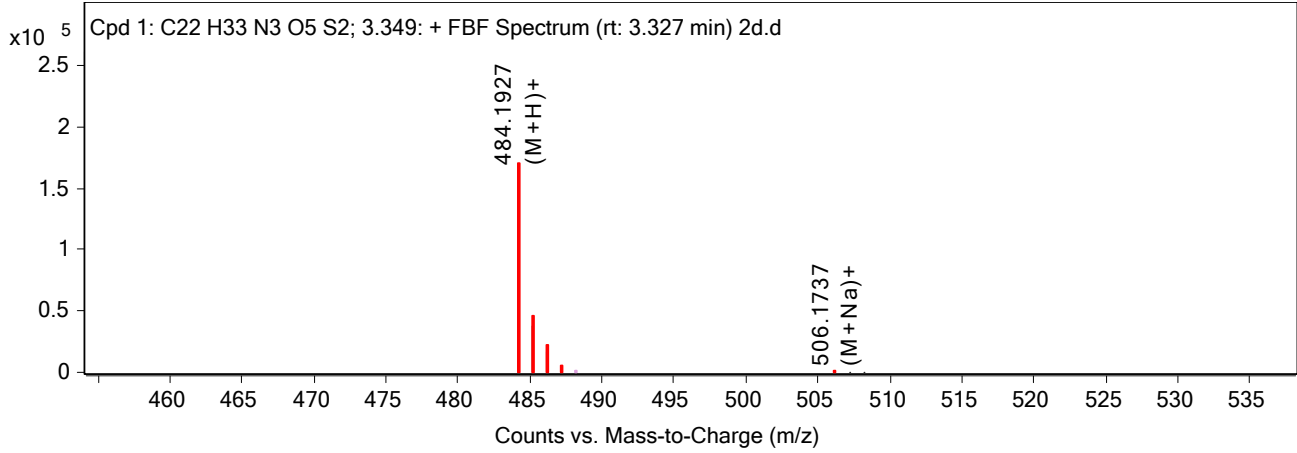

## MS Spectrum Peak List

| Obs. m/z | Charge | Abund     | Ion/Isotope |
|----------|--------|-----------|-------------|
| 484.1927 | 1      | 170076.86 | (M+H)+      |
| 485.1954 | 1      | 37749.28  | (M+H)+      |
| 486.1918 | 1      | 16337.28  | (M+H)+      |
| 487.1946 | 1      | 3302.68   | (M+H)+      |
| 506.1737 | 1      | 1570.67   | (M+Na)+     |
| 507.1764 | 1      | 565.41    | (M+Na)+     |
| 508.1751 | 1      | 269.02    | (M+Na)+     |

## MS Zoomed Spectrum

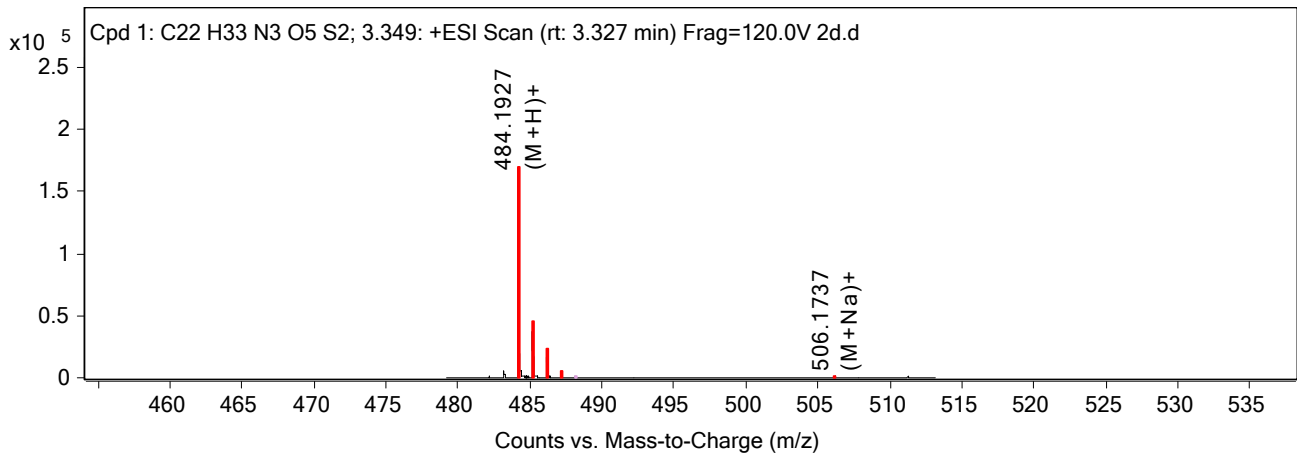

## MS Spectrum Peak List

| Obs. m/z | Charge | Abund     | Ion/Isotope | Tgt Mass Error (ppm) |
|----------|--------|-----------|-------------|----------------------|
| 484.1927 | 1      | 170076.85 | (M+H)+      | 1.61                 |
| 485.1954 | 1      | 37749.28  | (M+H)+      | 1.97                 |
| 486.1918 | 1      | 16337.28  | (M+H)+      | 1.52                 |
| 487.1946 | 1      | 3302.68   | (M+H)+      | -1.18                |
| 506.1737 | 1      | 1570.67   | (M+Na)+     | 3.34                 |
| 507.1764 | 1      | 565.41    | (M+Na)+     | 3.7                  |
| 508.1751 | 1      | 269.02    | (M+Na)+     | -1.35                |

--- End Of Report ---

# Target Compound Screening Report

|                                 |                                        |                               |                                                     |
|---------------------------------|----------------------------------------|-------------------------------|-----------------------------------------------------|
| <b>Data File</b>                | 37.d                                   | <b>Sample Name</b>            | H2973905                                            |
| <b>Sample Type</b>              | Sample                                 | <b>Position</b>               | P1-E1                                               |
| <b>Instrument Name</b>          | Instrument 1                           | <b>User Name</b>              | Denis V.Bylina                                      |
| <b>Acq Method</b>               | Fast_Gradient_HRMS_pos_Lock_08272019.m | <b>Acquired Time</b>          | 9/23/2021 10:13:22 PM (UTC+03:00)                   |
| <b>IRM Calibration Status</b>   | Success                                | <b>DA Method</b>              | 1.m                                                 |
| <b>Comment</b>                  |                                        |                               |                                                     |
| <b>Sample Group</b>             |                                        | <b>Info.</b>                  | Agilent 6224 TOF LC/MS                              |
| <b>MFC</b>                      | C24H37N3O6S                            | <b>Stream Name</b>            | LC 1                                                |
| <b>Acquisition Time (Local)</b> | 9/23/2021 10:13:22 PM (UTC+03:00)      | <b>Acquisition SW Version</b> | 6200 series TOF/6500 series Q-TOF B.08.00 (B8058.0) |
| <b>TOF Driver Version</b>       | 8.00.00                                | <b>TOF Firmware Version</b>   | 8.643                                               |
| <b>Tune Mass Range Max.</b>     | 1700                                   |                               |                                                     |

## Compound Table

| Label                         | Tgt Score | Mass Error (ppm) | Tgt Formula     | Obs. RT | Ref. Mass | Obs. Mass |
|-------------------------------|-----------|------------------|-----------------|---------|-----------|-----------|
| Cpd 1: C24 H37 N3 O6 S; 3.087 | 93.8      | -1.69            | C24 H37 N3 O6 S | 3.087   | 495.2403  | 495.2395  |

| Obs. m/z | Obs. RT | Obs. Mass | Tgt Formula     | Tgt Mass | Tgt Mass Error (ppm) | RT Diff.        | Find Cpd Algorithm |
|----------|---------|-----------|-----------------|----------|----------------------|-----------------|--------------------|
| 496.2467 | 3.087   | 495.2395  | C24 H37 N3 O6 S | 495.2403 | -1.69                | Find By Formula |                    |

## Compound Chromatograms

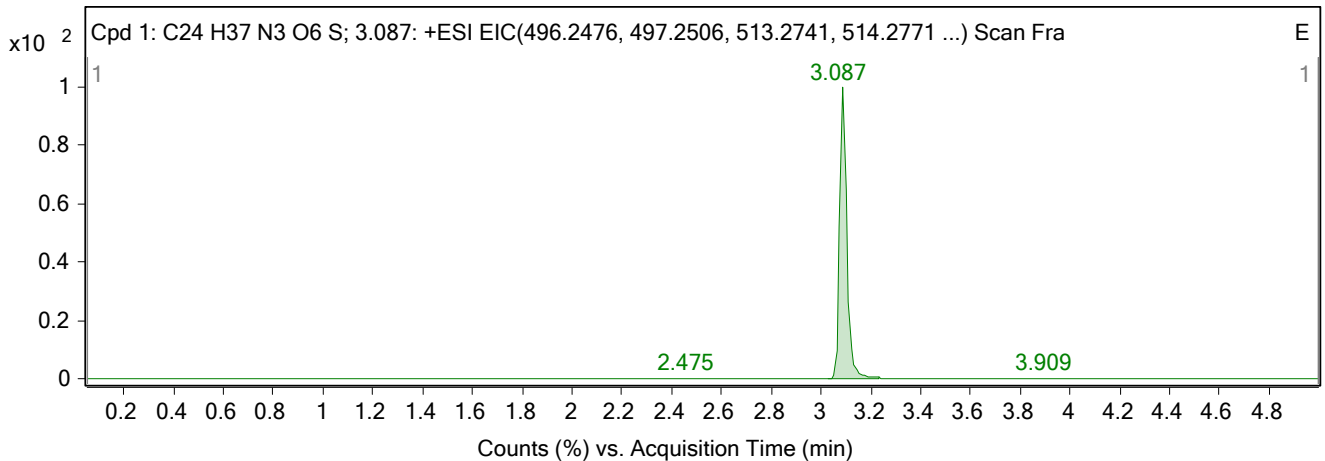

MS Zoomed Spectrum

# Target Compound Screening Report

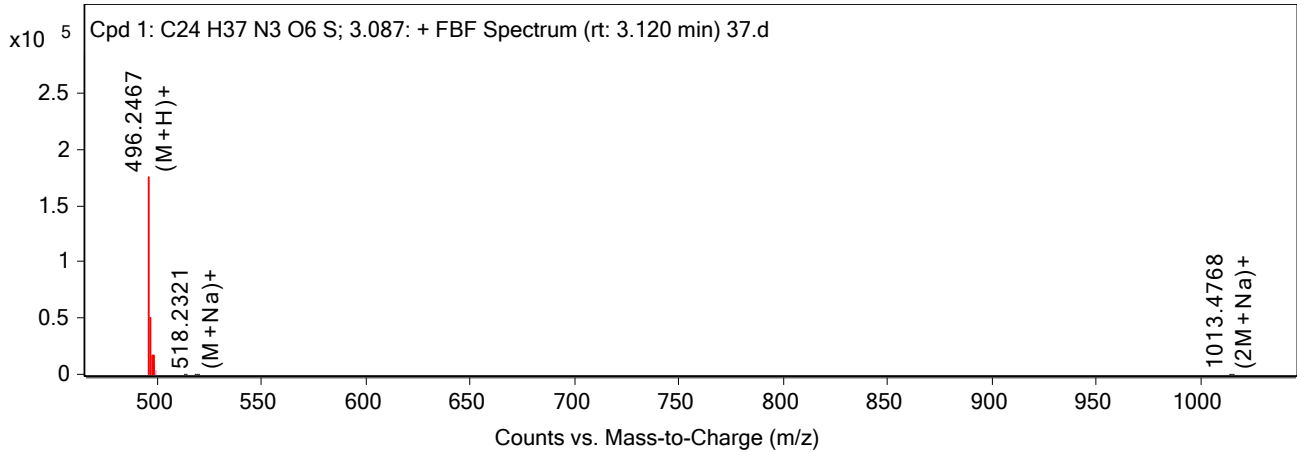

## MS Spectrum Peak List

| Obs. m/z  | Charge | Abund     | Ion/Isotope           |
|-----------|--------|-----------|-----------------------|
| 496.2467  | 1      | 175581.97 | (M+H)+                |
| 497.2499  | 1      | 40440.36  | (M+H)+                |
| 498.2476  | 1      | 11332.53  | (M+H)+                |
| 513.2682  | 1      | 71.01     | (M+NH <sub>4</sub> )+ |
| 518.2321  | 1      | 219       | (M+Na)+               |
| 519.2321  | 1      | 105.88    | (M+Na)+               |
| 520.2288  | 1      | 106.21    | (M+Na)+               |
| 1013.4768 | 1      | 149.45    | (2M+Na)+              |
| 1014.4632 | 1      | 101.8     | (2M+Na)+              |
| 1015.4687 | 1      | 72.32     | (2M+Na)+              |

## MS Zoomed Spectrum

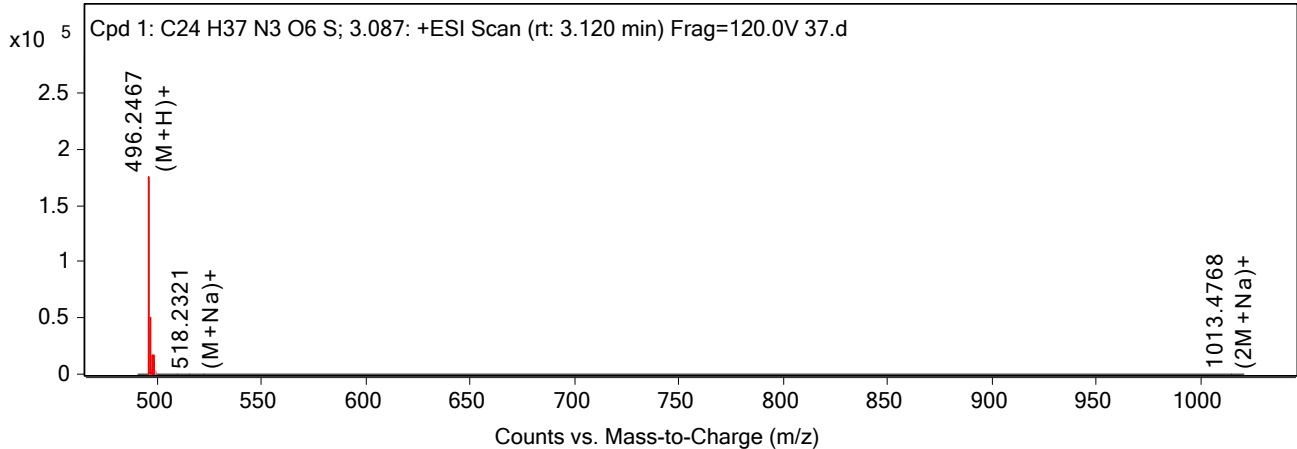

## MS Spectrum Peak List

| Obs. m/z  | Charge | Abund     | Ion/Isotope           | Tgt Mass Error (ppm) |
|-----------|--------|-----------|-----------------------|----------------------|
| 496.2467  | 1      | 175581.97 | (M+H)+                | 1.7                  |
| 497.2499  | 1      | 40440.36  | (M+H)+                | 1.49                 |
| 498.2476  | 1      | 11332.53  | (M+H)+                | 2.04                 |
| 513.2682  | 1      | 71.01     | (M+NH <sub>4</sub> )+ | 11.65                |
| 518.2321  | 1      | 219       | (M+Na)+               | -4.93                |
| 519.2321  | 1      | 105.88    | (M+Na)+               | 0.92                 |
| 520.2288  | 1      | 106.21    | (M+Na)+               | 3.5                  |
| 1013.4768 | 1      | 149.45    | (2M+Na)+              | -6.89                |
| 1014.4632 | 1      | 101.8     | (2M+Na)+              | 9.55                 |
| 1015.4687 | 1      | 72.32     | (2M+Na)+              | 3.63                 |

--- End Of Report ---

# Target Compound Screening Report

|                                 |                                        |                               |                                                     |
|---------------------------------|----------------------------------------|-------------------------------|-----------------------------------------------------|
| <b>Data File</b>                | 26.d                                   | <b>Sample Name</b>            | H2980920                                            |
| <b>Sample Type</b>              | Sample                                 | <b>Position</b>               | P1-C8                                               |
| <b>Instrument Name</b>          | Instrument 1                           | <b>User Name</b>              | Denis V.Bylina                                      |
| <b>Acq Method</b>               | Fast_Gradient_HRMS_pos_Lock_08272019.m | <b>Acquired Time</b>          | 9/24/2021 12:56:03 PM (UTC+03:00)                   |
| <b>IRM Calibration Status</b>   | Success                                | <b>DA Method</b>              | 1.m                                                 |
| <b>Comment</b>                  |                                        | <b>Info.</b>                  | Agilent 6224 TOF LC/MS                              |
| <b>Sample Group</b>             |                                        | <b>Stream Name</b>            | LC 1                                                |
| <b>MFC</b>                      | C22H35N3O4S2                           | <b>Acquisition SW Version</b> | 6200 series TOF/6500 series Q-TOF B.08.00 (B8058.0) |
| <b>Acquisition Time (Local)</b> | 9/24/2021 12:56:03 PM (UTC+03:00)      | <b>TOF Firmware Version</b>   | 8.643                                               |
| <b>TOF Driver Version</b>       | 8.00.00                                |                               |                                                     |
| <b>Tune Mass Range Max.</b>     | 1700                                   |                               |                                                     |

## Compound Table

| Label                          | Tgt Score | Mass Error (ppm) | Tgt Formula      | Obs. RT | Ref. Mass | Obs. Mass |
|--------------------------------|-----------|------------------|------------------|---------|-----------|-----------|
| Cpd 1: C22 H35 N3 O4 S2; 3.312 | 93.34     | -1.8             | C22 H35 N3 O4 S2 | 3.312   | 469.2069  | 469.2061  |

| Obs. m/z | Obs. RT | Obs. Mass | Tgt Formula      | Tgt Mass | Tgt Mass Error (ppm) | RT Diff.        | Find Cps Algorithm |
|----------|---------|-----------|------------------|----------|----------------------|-----------------|--------------------|
| 470.2133 | 3.312   | 469.2061  | C22 H35 N3 O4 S2 | 469.2069 | -1.8                 | Find By Formula |                    |

## Compound Chromatograms

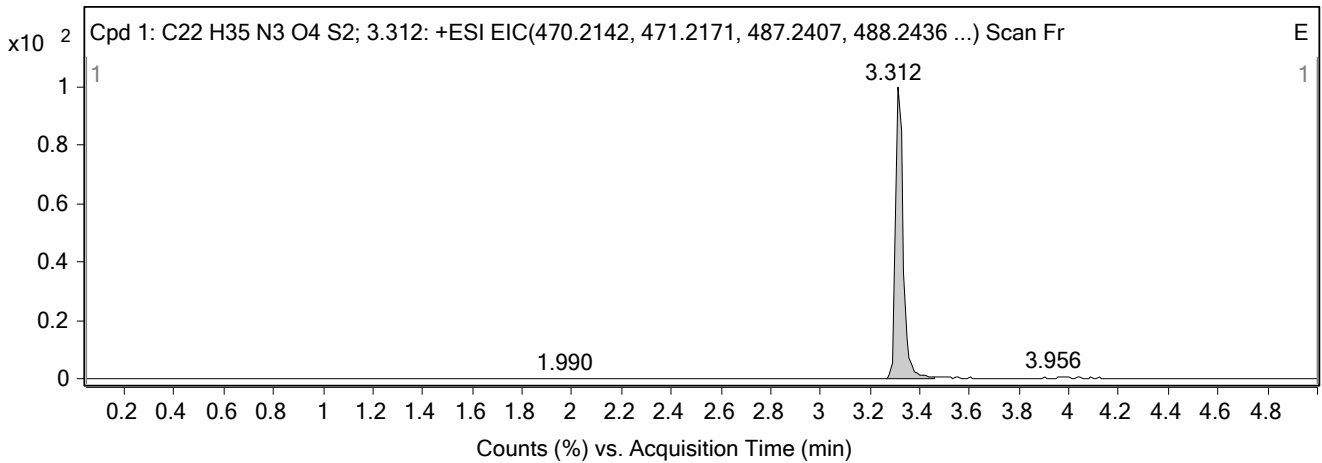

## MS Zoomed Spectrum

# Target Compound Screening Report

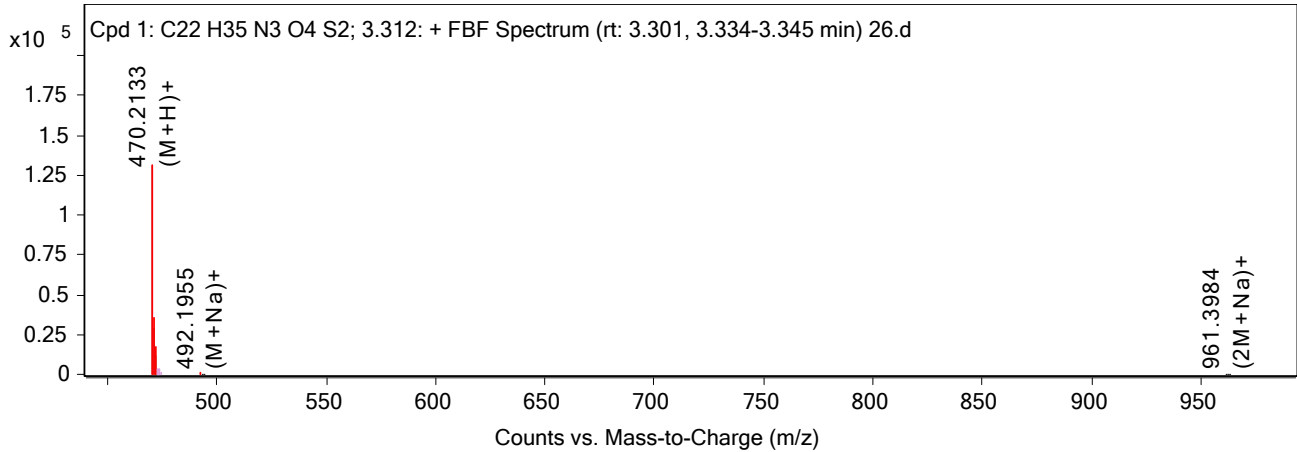

## MS Spectrum Peak List

| Obs. m/z | Charge | Abund     | Ion/Isotope |
|----------|--------|-----------|-------------|
| 470.2133 | 1      | 131060.13 | (M+H)+      |
| 471.2163 | 1      | 28710.51  | (M+H)+      |
| 472.2124 | 1      | 12437.16  | (M+H)+      |
| 492.1955 | 1      | 673.54    | (M+Na)+     |
| 493.1949 | 1      | 198.54    | (M+Na)+     |
| 494.1928 | 1      | 132.02    | (M+Na)+     |
| 961.3984 | 1      | 374.8     | (2M+Na)+    |
| 962.4011 | 1      | 283.33    | (2M+Na)+    |
| 963.3979 | 1      | 148.47    | (2M+Na)+    |

## MS Zoomed Spectrum

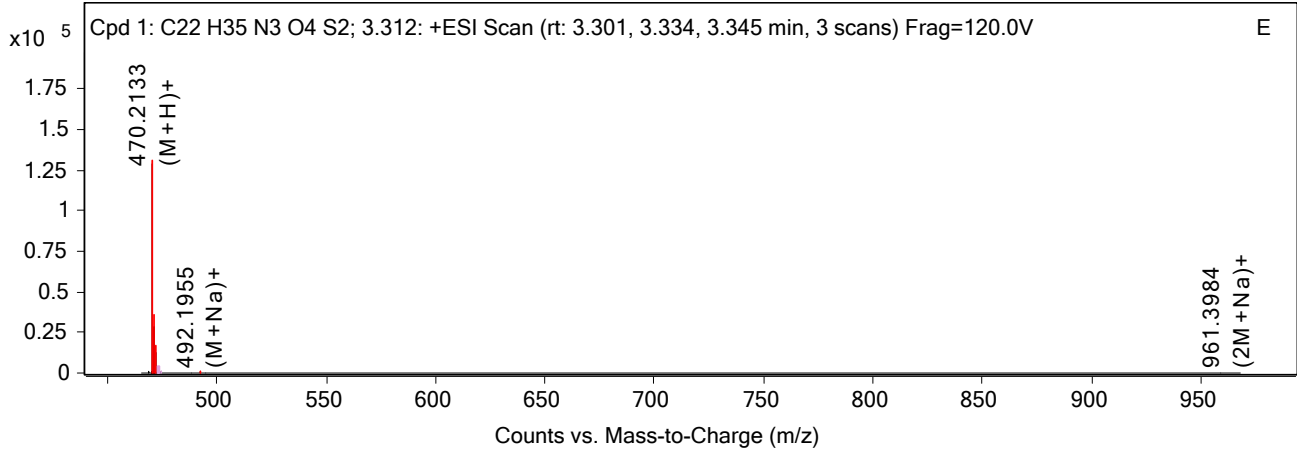

## MS Spectrum Peak List

| Obs. m/z | Charge | Abund     | Ion/Isotope | Tgt Mass Error (ppm) |
|----------|--------|-----------|-------------|----------------------|
| 470.2133 | 1      | 131060.13 | (M+H)+      | 1.79                 |
| 470.2133 |        | 131060.13 |             |                      |
| 471.2163 | 1      | 28710.51  | (M+H)+      | 1.62                 |
| 472.2124 | 1      | 12437.16  | (M+H)+      | 1.61                 |
| 492.1955 | 1      | 673.54    | (M+Na)+     | 1.35                 |
| 493.1949 | 1      | 198.54    | (M+Na)+     | 8.33                 |
| 494.1928 | 1      | 132.02    | (M+Na)+     | 4.54                 |
| 961.3984 | 1      | 374.8     | (2M+Na)+    | 4.78                 |
| 962.4011 | 1      | 283.33    | (2M+Na)+    | 5.02                 |
| 963.3979 | 1      | 148.47    | (2M+Na)+    | 5.81                 |

--- End Of Report ---



# Target Compound Screening Report

|                                 |                                        |                               |                                                     |
|---------------------------------|----------------------------------------|-------------------------------|-----------------------------------------------------|
| <b>Data File</b>                | 24.d                                   | <b>Sample Name</b>            | H2979293                                            |
| <b>Sample Type</b>              | Sample                                 | <b>Position</b>               | P1-C6                                               |
| <b>Instrument Name</b>          | Instrument 1                           | <b>User Name</b>              | Denis V.Bylina                                      |
| <b>Acq Method</b>               | Fast_Gradient_HRMS_pos_Lock_08272019.m | <b>Acquired Time</b>          | 9/23/2021 1:24:21 PM (UTC+03:00)                    |
| <b>IRM Calibration Status</b>   | Success                                | <b>DA Method</b>              | 1.m                                                 |
| <b>Comment</b>                  |                                        |                               |                                                     |
| <b>Sample Group</b>             |                                        | <b>Info.</b>                  | Agilent 6224 TOF LC/MS                              |
| <b>MFC</b>                      | C21H34N4O5S2                           | <b>Stream Name</b>            | LC 1                                                |
| <b>Acquisition Time (Local)</b> | 9/23/2021 1:24:21 PM (UTC+03:00)       | <b>Acquisition SW Version</b> | 6200 series TOF/6500 series Q-TOF B.08.00 (B8058.0) |
| <b>TOF Driver Version</b>       | 8.00.00                                | <b>TOF Firmware Version</b>   | 8.643                                               |
| <b>Tune Mass Range Max.</b>     | 1700                                   |                               |                                                     |

## Compound Table

| Label                          | Tgt Score | Mass Error (ppm) | Tgt Formula      | Obs. RT | Ref. Mass | Obs. Mass |
|--------------------------------|-----------|------------------|------------------|---------|-----------|-----------|
| Cpd 1: C21 H34 N4 O5 S2; 3.253 | 96.55     | -0.86            | C21 H34 N4 O5 S2 | 3.253   | 486.1971  | 486.1966  |

| Obs. m/z | Obs. RT | Obs. Mass | Tgt Formula      | Tgt Mass | Tgt Mass Error (ppm) | RT Diff.        | Find Cps Algorithm |
|----------|---------|-----------|------------------|----------|----------------------|-----------------|--------------------|
| 487.204  | 3.253   | 486.1966  | C21 H34 N4 O5 S2 | 486.1971 | -0.86                | Find By Formula |                    |

## Compound Chromatograms

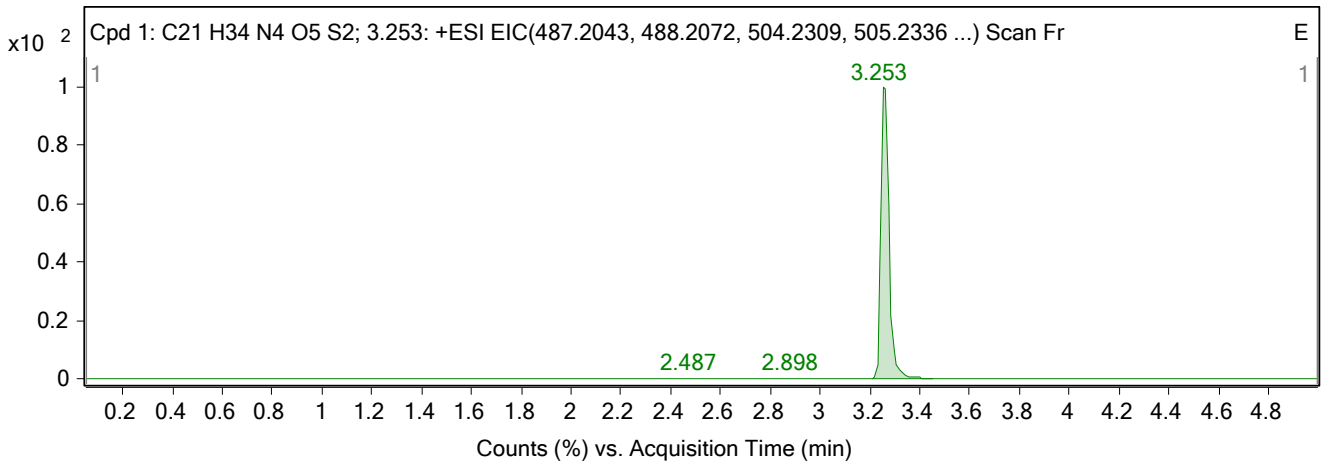

MS Zoomed Spectrum

# Target Compound Screening Report

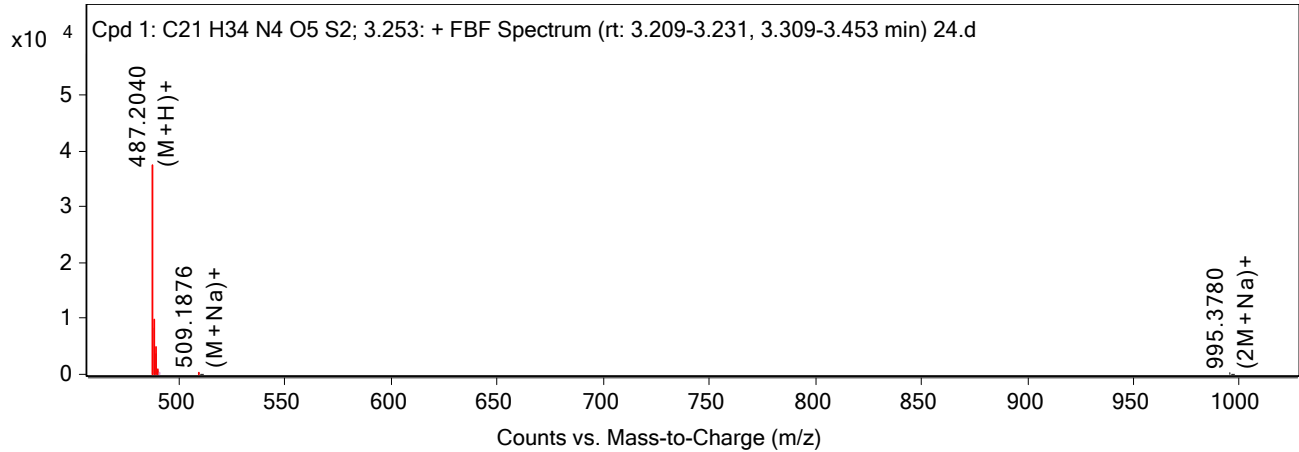

## MS Spectrum Peak List

| Obs. m/z | Charge | Abund    | Ion/Isotope |
|----------|--------|----------|-------------|
| 487.204  | 1      | 37433.84 | (M+H)+      |
| 488.2067 | 1      | 8314.08  | (M+H)+      |
| 489.2027 | 1      | 3823.58  | (M+H)+      |
| 490.2051 | 1      | 779.89   | (M+H)+      |
| 509.1876 | 1      | 384.59   | (M+Na)+     |
| 510.1874 | 1      | 118.66   | (M+Na)+     |
| 511.1823 | 1      | 74.27    | (M+Na)+     |
| 995.378  | 1      | 199.17   | (2M+Na)+    |
| 996.3823 | 1      | 110.39   | (2M+Na)+    |
| 997.3771 | 1      | 81.27    | (2M+Na)+    |

## MS Zoomed Spectrum

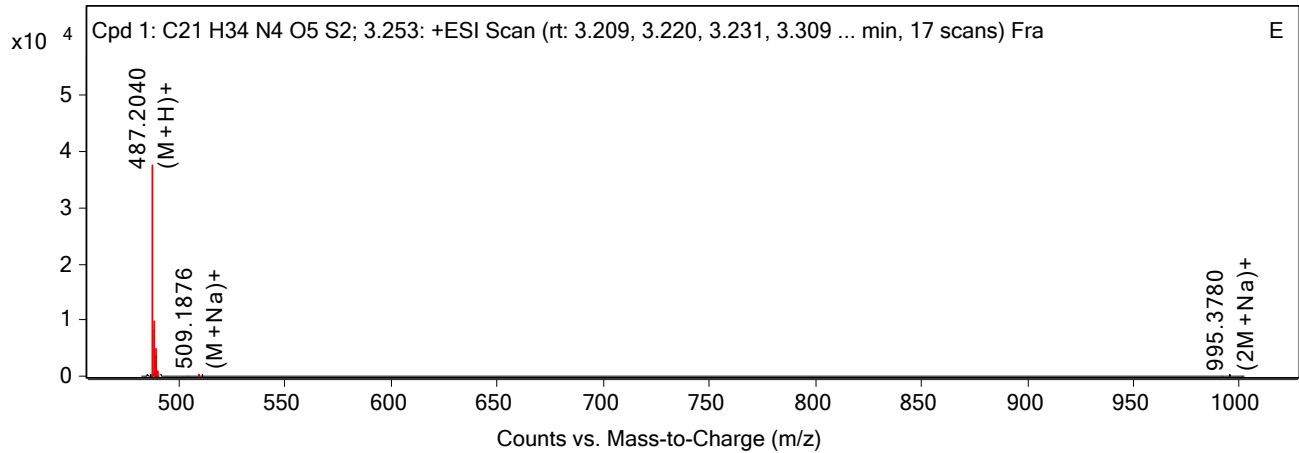

## MS Spectrum Peak List

| Obs. m/z | Charge | Abund    | Ion/Isotope | Tgt Mass Error (ppm) |
|----------|--------|----------|-------------|----------------------|
| 487.204  | 1      | 37433.84 | (M+H)+      | 0.77                 |
| 488.2067 | 1      | 8314.08  | (M+H)+      | 0.89                 |
| 489.2027 | 1      | 3823.58  | (M+H)+      | 1.16                 |
| 490.2051 | 1      | 779.89   | (M+H)+      | -0.73                |
| 509.1876 | 1      | 384.59   | (M+Na)+     | -2.55                |
| 510.1874 | 1      | 118.66   | (M+Na)+     | 3.41                 |
| 511.1823 | 1      | 74.27    | (M+Na)+     | 5.75                 |
| 995.378  | 1      | 199.17   | (2M+Na)+    | 5.35                 |
| 996.3823 | 1      | 110.39   | (2M+Na)+    | 3.92                 |
| 997.3771 | 1      | 81.27    | (2M+Na)+    | 6.54                 |

--- End Of Report ---

# Target Compound Screening Report

|                                 |                                        |                               |                                                     |
|---------------------------------|----------------------------------------|-------------------------------|-----------------------------------------------------|
| <b>Data File</b>                | 34.d                                   | <b>Sample Name</b>            | H2974027                                            |
| <b>Sample Type</b>              | Sample                                 | <b>Position</b>               | P1-D7                                               |
| <b>Instrument Name</b>          | Instrument 1                           | <b>User Name</b>              | Denis V.Bylina                                      |
| <b>Acq Method</b>               | Fast_Gradient_HRMS_pos_Lock_08272019.m | <b>Acquired Time</b>          | 9/22/2021 4:51:17 PM (UTC+03:00)                    |
| <b>IRM Calibration Status</b>   | Success                                | <b>DA Method</b>              | 1.m                                                 |
| <b>Comment</b>                  |                                        |                               |                                                     |
| <b>Sample Group</b>             |                                        | <b>Info.</b>                  | Agilent 6224 TOF LC/MS                              |
| <b>MFC</b>                      | C24H34N2O4S                            | <b>Stream Name</b>            | LC 1                                                |
| <b>Acquisition Time (Local)</b> | 9/22/2021 4:51:17 PM (UTC+03:00)       | <b>Acquisition SW Version</b> | 6200 series TOF/6500 series Q-TOF B.08.00 (B8058.0) |
| <b>TOF Driver Version</b>       | 8.00.00                                | <b>TOF Firmware Version</b>   | 8.643                                               |
| <b>Tune Mass Range Max.</b>     | 1700                                   |                               |                                                     |

## Compound Table

| Label                         | Tgt Score | Mass Error (ppm) | Tgt Formula     | Obs. RT | Ref. Mass | Obs. Mass |
|-------------------------------|-----------|------------------|-----------------|---------|-----------|-----------|
| Cpd 1: C24 H34 N2 O4 S; 4.017 | 95.8      | -0.98            | C24 H34 N2 O4 S | 4.017   | 446.2239  | 446.2235  |

| Obs. m/z | Obs. RT | Obs. Mass | Tgt Formula     | Tgt Mass | Tgt Mass Error (ppm) | RT Diff.        | Find Cpds Algorithm |
|----------|---------|-----------|-----------------|----------|----------------------|-----------------|---------------------|
| 447.2309 | 4.017   | 446.2235  | C24 H34 N2 O4 S | 446.2239 | -0.98                | Find By Formula |                     |

## Compound Chromatograms

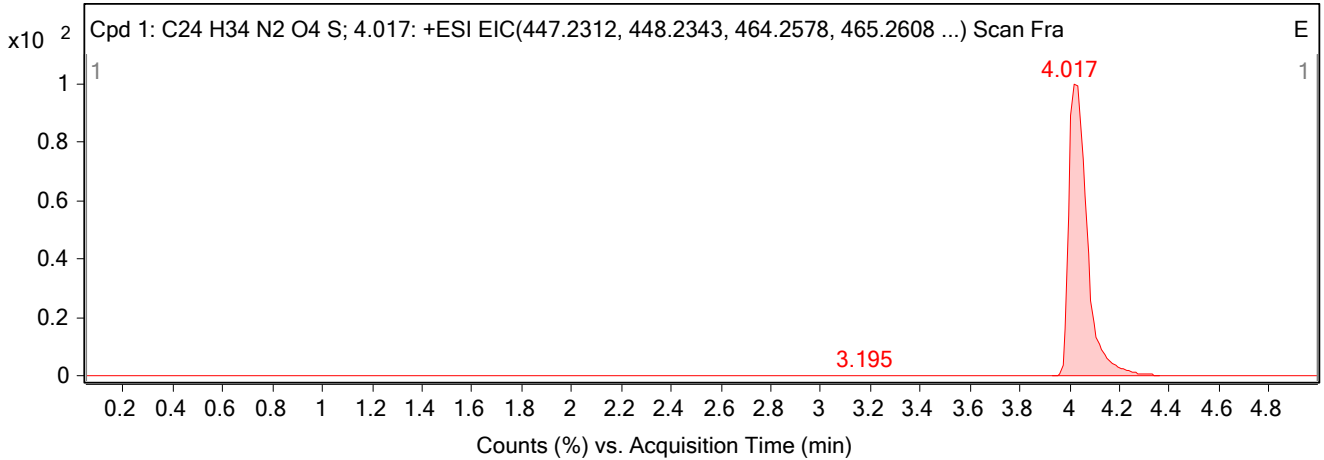

MS Zoomed Spectrum

# Target Compound Screening Report

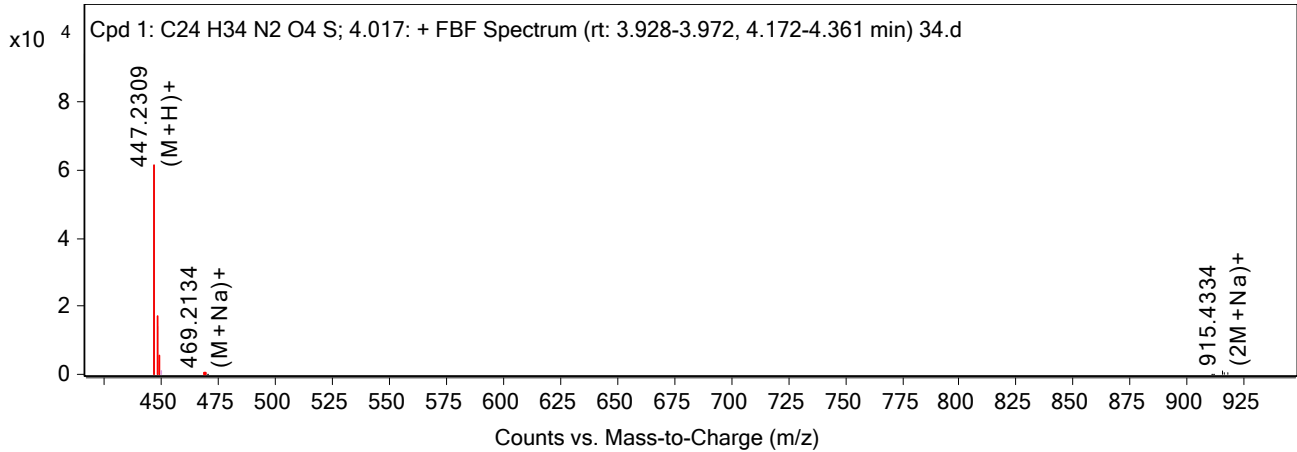

## MS Spectrum Peak List

| Obs. m/z | Charge | Abund    | Ion/Isotope            |
|----------|--------|----------|------------------------|
| 447.2309 | 1      | 61369.73 | (M+H)+                 |
| 448.2339 | 1      | 14351.24 | (M+H)+                 |
| 449.2321 | 1      | 4019.23  | (M+H)+                 |
| 469.2134 | 1      | 581.71   | (M+Na)+                |
| 470.2176 | 1      | 206.88   | (M+Na)+                |
| 910.4791 | 1      | 126.47   | (2M+NH <sub>4</sub> )+ |
| 911.4812 | 1      | 93.63    | (2M+NH <sub>4</sub> )+ |
| 915.4334 | 1      | 1136.11  | (2M+Na)+               |
| 916.4329 | 1      | 574.46   | (2M+Na)+               |
| 917.4309 | 1      | 334.96   | (2M+Na)+               |

## MS Zoomed Spectrum

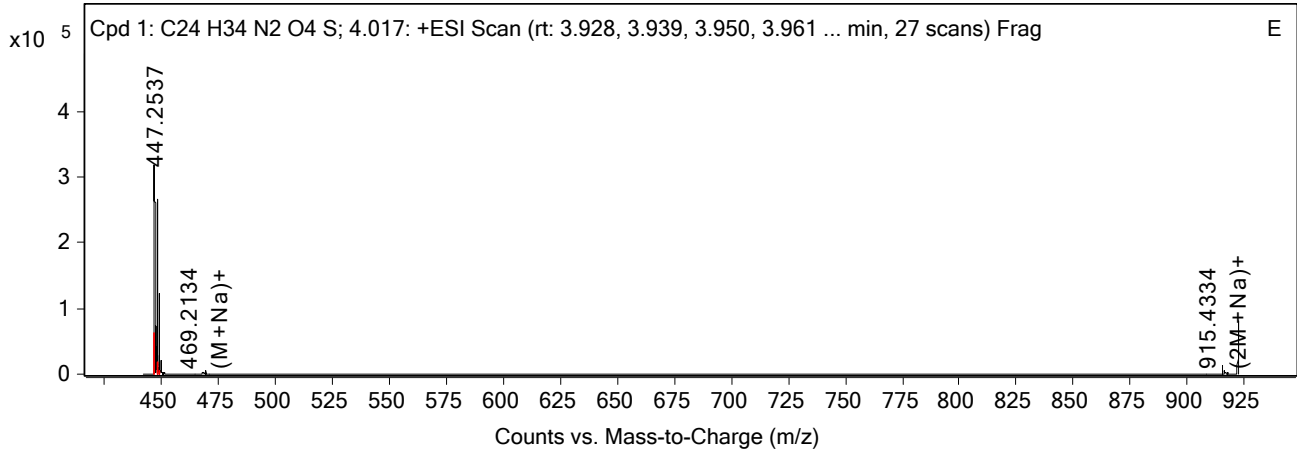

## MS Spectrum Peak List

| Obs. m/z | Charge | Abund    | Ion/Isotope            | Tgt Mass Error (ppm) |
|----------|--------|----------|------------------------|----------------------|
| 447.2309 | 1      | 61369.72 | (M+H)+                 | 0.67                 |
| 448.2339 | 1      | 14351.24 | (M+H)+                 | 1                    |
| 449.2321 | 1      | 4019.23  | (M+H)+                 | -0.07                |
| 469.2134 | 1      | 581.71   | (M+Na)+                | -0.49                |
| 470.2176 | 1      | 206.88   | (M+Na)+                | -2.87                |
| 910.4791 | 1      | 126.47   | (2M+NH <sub>4</sub> )+ | 2.83                 |
| 911.4812 | 1      | 93.63    | (2M+NH <sub>4</sub> )+ | 3.94                 |
| 915.4334 | 1      | 1136.11  | (2M+Na)+               | 4.05                 |
| 916.4329 | 1      | 574.46   | (2M+Na)+               | 7.93                 |
| 917.4309 | 1      | 334.96   | (2M+Na)+               | 9.53                 |

--- End Of Report ---

# Target Compound Screening Report

|                                 |                                        |                               |                                                     |
|---------------------------------|----------------------------------------|-------------------------------|-----------------------------------------------------|
| <b>Data File</b>                | 3.d                                    | <b>Sample Name</b>            | H3475368                                            |
| <b>Sample Type</b>              | Sample                                 | <b>Position</b>               | P1-A3                                               |
| <b>Instrument Name</b>          | Instrument 1                           | <b>User Name</b>              | Denis V.Bylina                                      |
| <b>Acq Method</b>               | Fast_Gradient_HRMS_pos_Lock_08272019.m | <b>Acquired Time</b>          | 10/7/2021 4:53:01 PM (UTC+03:00)                    |
| <b>IRM Calibration Status</b>   | Success                                | <b>DA Method</b>              | 1.m                                                 |
| <b>Comment</b>                  |                                        |                               |                                                     |
| <b>Sample Group</b>             |                                        | <b>Info.</b>                  | Agilent 6224 TOF LC/MS                              |
| <b>MFC</b>                      | C20H28N2O6S2                           | <b>Stream Name</b>            | LC 1                                                |
| <b>Acquisition Time (Local)</b> | 10/7/2021 4:53:01 PM (UTC+03:00)       | <b>Acquisition SW Version</b> | 6200 series TOF/6500 series Q-TOF B.08.00 (B8058.0) |
| <b>TOF Driver Version</b>       | 8.00.00                                | <b>TOF Firmware Version</b>   | 8.643                                               |
| <b>Tune Mass Range Max.</b>     | 1700                                   |                               |                                                     |

## Compound Table

| Label                          | Tgt Score | Mass Error (ppm) | Tgt Formula      | Obs. RT | Ref. Mass | Obs. Mass |
|--------------------------------|-----------|------------------|------------------|---------|-----------|-----------|
| Cpd 1: C20 H28 N2 O6 S2; 3.090 | 95.38     | 0.1              | C20 H28 N2 O6 S2 | 3.09    | 456.1389  | 456.1389  |

| Obs. m/z | Obs. RT | Obs. Mass | Tgt Formula      | Tgt Mass | Tgt Mass Error (ppm) | RT Diff.        | Find Cpds Algorithm |
|----------|---------|-----------|------------------|----------|----------------------|-----------------|---------------------|
| 457.1462 | 3.09    | 456.1389  | C20 H28 N2 O6 S2 | 456.1389 | 0.1                  | Find By Formula |                     |

## Compound Chromatograms

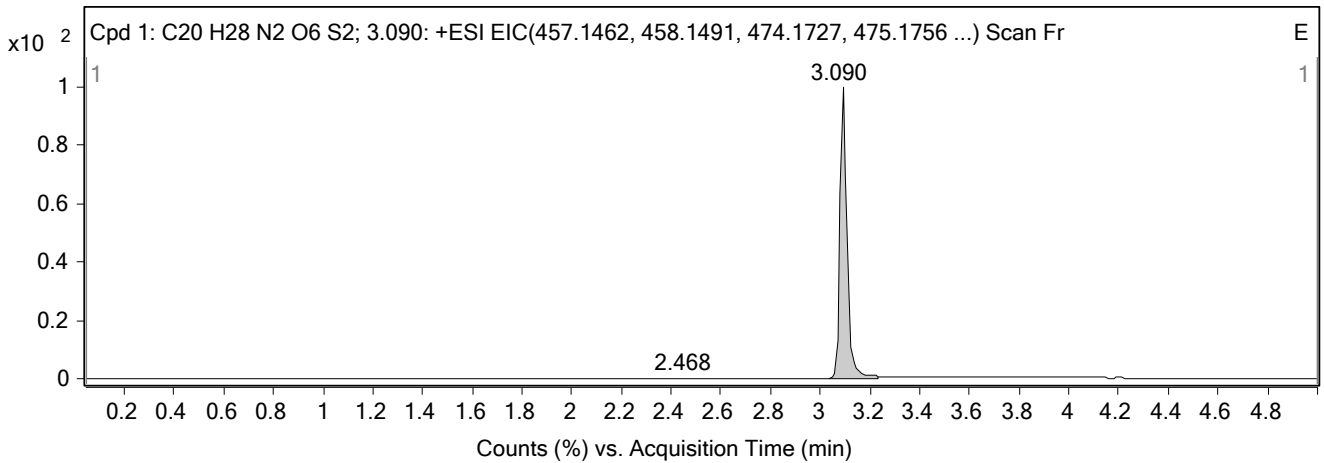

MS Zoomed Spectrum

# Target Compound Screening Report

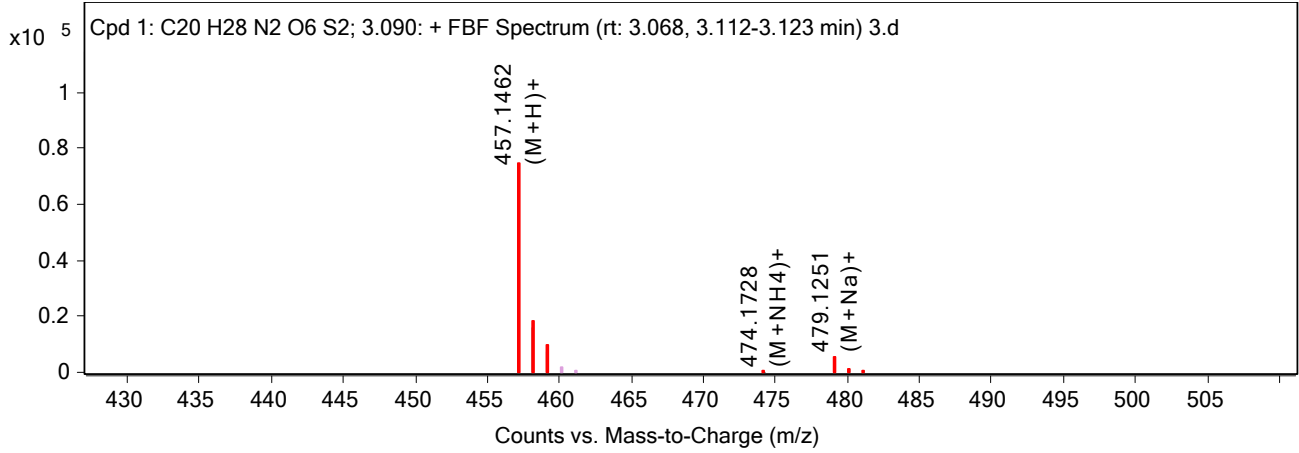

## MS Spectrum Peak List

| Obs. m/z | Charge | Abund    | Ion/Isotope           |
|----------|--------|----------|-----------------------|
| 457.1462 | 1      | 74601.09 | (M+H)+                |
| 458.1501 | 1      | 16153.98 | (M+H)+                |
| 459.1456 | 1      | 7511.37  | (M+H)+                |
| 474.1728 | 1      | 308.01   | (M+NH <sub>4</sub> )+ |
| 479.1251 | 1      | 5550.54  | (M+Na)+               |
| 480.1286 | 1      | 1382.03  | (M+Na)+               |
| 481.1261 | 1      | 692.15   | (M+Na)+               |

## MS Zoomed Spectrum

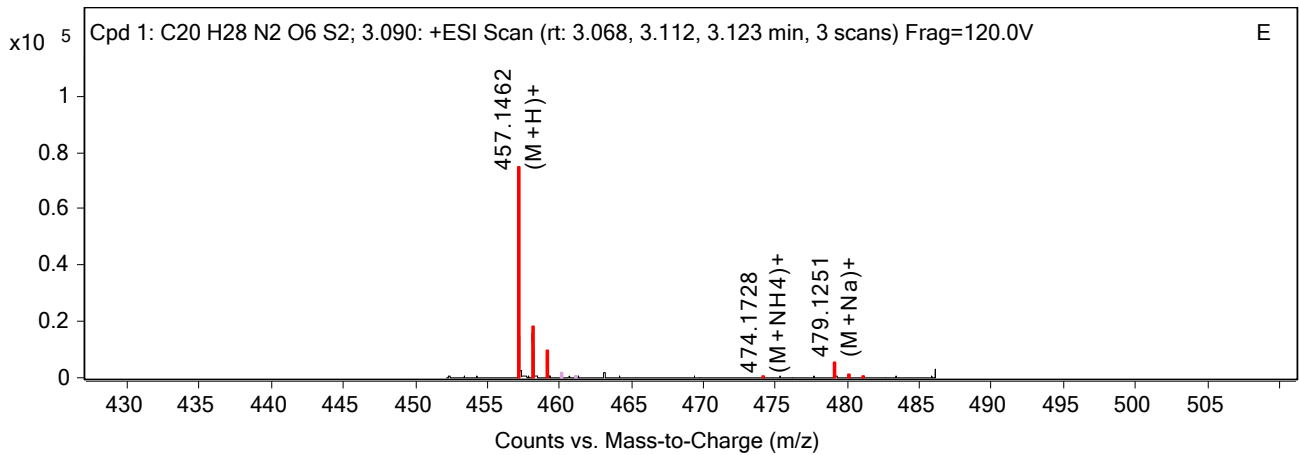

## MS Spectrum Peak List

| Obs. m/z | Charge | Abund    | Ion/Isotope           | Tgt Mass Error (ppm) |
|----------|--------|----------|-----------------------|----------------------|
| 457.1462 | 1      | 74601.09 | (M+H)+                | -0.12                |
| 457.1462 |        | 74601.09 |                       |                      |
| 458.1501 | 1      | 16153.98 | (M+H)+                | -2.22                |
| 459.1456 | 1      | 7511.37  | (M+H)+                | -1.3                 |
| 474.1728 | 1      | 308.01   | (M+NH <sub>4</sub> )+ | -0.2                 |
| 479.1251 | 1      | 5550.54  | (M+Na)+               | 6.19                 |
| 480.1286 | 1      | 1382.03  | (M+Na)+               | 5.07                 |
| 481.1261 | 1      | 692.15   | (M+Na)+               | 1.61                 |

--- End Of Report ---

# Target Compound Screening Report

|                                 |                                        |                               |                                                     |
|---------------------------------|----------------------------------------|-------------------------------|-----------------------------------------------------|
| <b>Data File</b>                | 36.d                                   | <b>Sample Name</b>            | H2980849                                            |
| <b>Sample Type</b>              | Sample                                 | <b>Position</b>               | P1-D9                                               |
| <b>Instrument Name</b>          | Instrument 1                           | <b>User Name</b>              | Denis V.Bylina                                      |
| <b>Acq Method</b>               | Fast_Gradient_HRMS_pos_Lock_08272019.m | <b>Acquired Time</b>          | 9/24/2021 1:34:44 PM (UTC+03:00)                    |
| <b>IRM Calibration Status</b>   | Success                                | <b>DA Method</b>              | 1.m                                                 |
| <b>Comment</b>                  |                                        |                               |                                                     |
| <b>Sample Group</b>             |                                        | <b>Info.</b>                  | Agilent 6224 TOF LC/MS                              |
| <b>MFC</b>                      | C21H32N4O5S2                           | <b>Stream Name</b>            | LC 1                                                |
| <b>Acquisition Time (Local)</b> | 9/24/2021 1:34:44 PM (UTC+03:00)       | <b>Acquisition SW Version</b> | 6200 series TOF/6500 series Q-TOF B.08.00 (B8058.0) |
| <b>TOF Driver Version</b>       | 8.00.00                                | <b>TOF Firmware Version</b>   | 8.643                                               |
| <b>Tune Mass Range Max.</b>     | 1700                                   |                               |                                                     |

## Compound Table

| Label                          | Tgt Score | Mass Error (ppm) | Tgt Formula      | Obs. RT | Ref. Mass | Obs. Mass |
|--------------------------------|-----------|------------------|------------------|---------|-----------|-----------|
| Cpd 1: C21 H32 N4 O5 S2; 3.290 | 93.13     | -2.01            | C21 H32 N4 O5 S2 | 3.29    | 484.1814  | 484.1804  |

| Obs. m/z | Obs. RT | Obs. Mass | Tgt Formula      | Tgt Mass | Tgt Mass Error (ppm) | RT Diff.        | Find Cpds Algorithm |
|----------|---------|-----------|------------------|----------|----------------------|-----------------|---------------------|
| 485.1878 | 3.29    | 484.1804  | C21 H32 N4 O5 S2 | 484.1814 | -2.01                | Find By Formula |                     |

## Compound Chromatograms

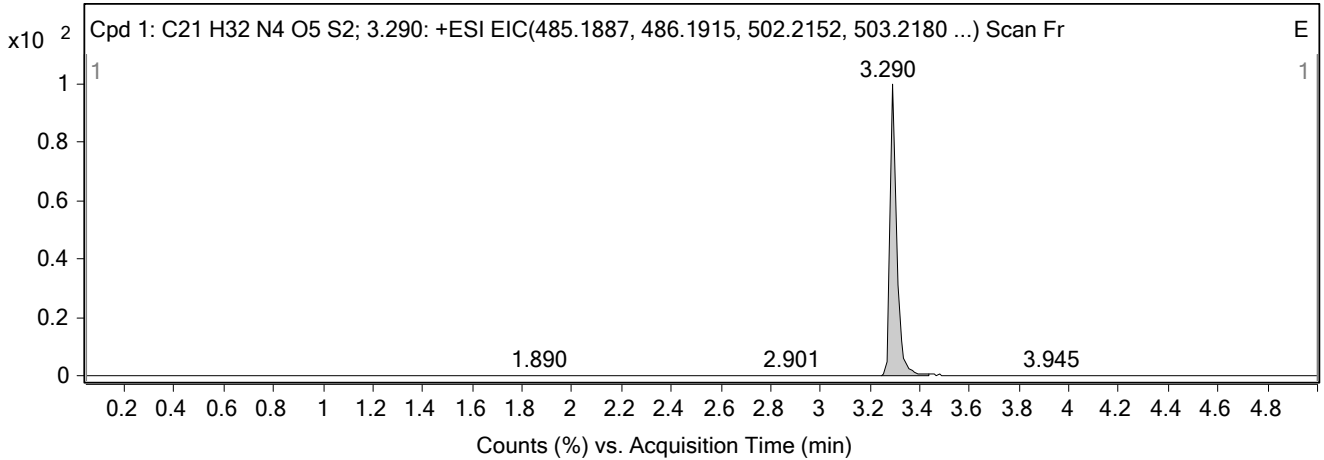

MS Zoomed Spectrum

# Target Compound Screening Report

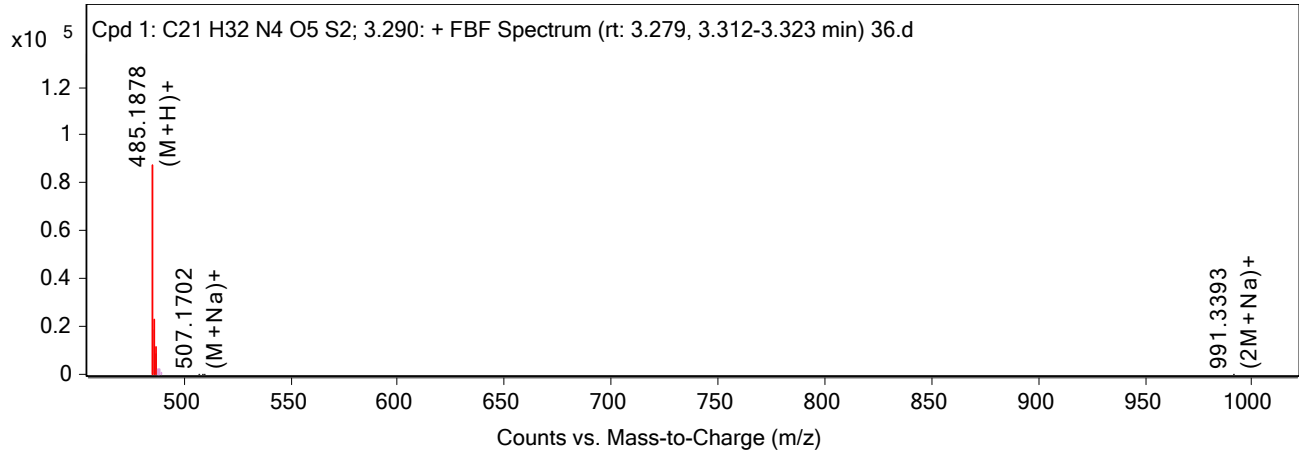

## MS Spectrum Peak List

| Obs. m/z | Charge | Abund    | Ion/Isotope |
|----------|--------|----------|-------------|
| 485.1878 | 1      | 87304.8  | (M+H)+      |
| 486.1903 | 1      | 18475.08 | (M+H)+      |
| 487.1868 | 1      | 8468.09  | (M+H)+      |
| 507.1702 | 1      | 297.74   | (M+Na)+     |
| 508.1712 | 1      | 120.28   | (M+Na)+     |
| 509.1778 | 1      | 76.17    | (M+Na)+     |
| 991.3393 | 1      | 76.63    | (2M+Na)+    |

## MS Zoomed Spectrum

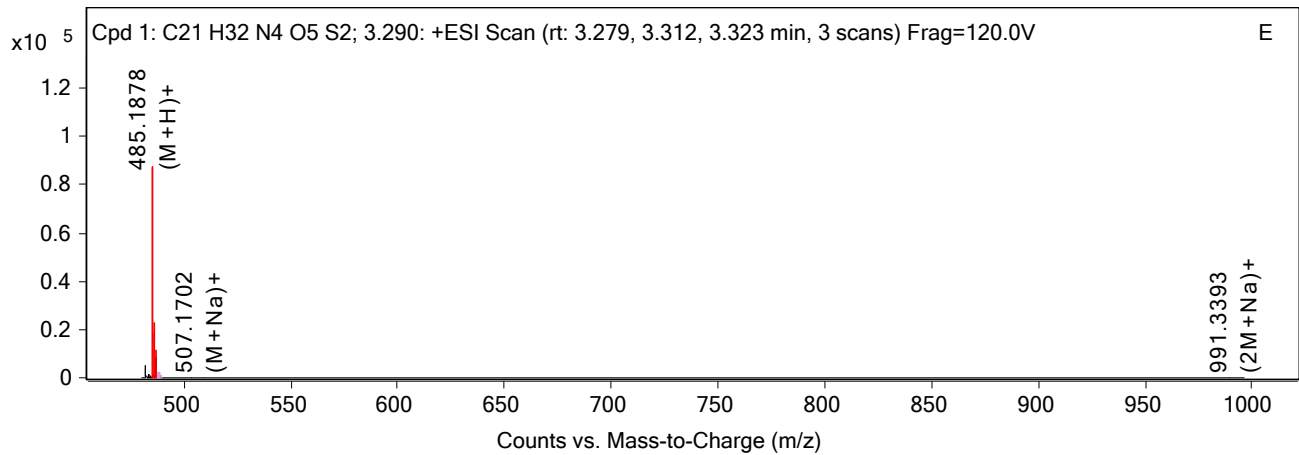

## MS Spectrum Peak List

| Obs. m/z | Charge | Abund    | Ion/Isotope | Tgt Mass Error (ppm) |
|----------|--------|----------|-------------|----------------------|
| 485.1878 | 1      | 87304.81 | (M+H)+      | 1.93                 |
| 486.1903 | 1      | 18475.08 | (M+H)+      | 2.49                 |
| 487.1868 | 1      | 8468.09  | (M+H)+      | 1.61                 |
| 507.1702 | 1      | 297.74   | (M+Na)+     | 0.84                 |
| 508.1712 | 1      | 120.28   | (M+Na)+     | 4.42                 |
| 509.1778 | 1      | 76.17    | (M+Na)+     | -16.21               |
| 991.3393 | 1      | 76.63    | (2M+Na)+    | 12.86                |

--- End Of Report ---



# Target Compound Screening Report

|                                 |                                        |                               |                                                     |
|---------------------------------|----------------------------------------|-------------------------------|-----------------------------------------------------|
| <b>Data File</b>                | 32.d                                   | <b>Sample Name</b>            | T8733239                                            |
| <b>Sample Type</b>              | Sample                                 | <b>Position</b>               | P1-D5                                               |
| <b>Instrument Name</b>          | Instrument 1                           | <b>User Name</b>              | Denis V.Bylina                                      |
| <b>Acq Method</b>               | Fast_Gradient_HRMS_pos_Lock_08272019.m | <b>Acquired Time</b>          | 9/24/2021 1:18:07 PM (UTC+03:00)                    |
| <b>IRM Calibration Status</b>   | Success                                | <b>DA Method</b>              | 1.m                                                 |
| <b>Comment</b>                  |                                        |                               |                                                     |
| <b>Sample Group</b>             |                                        | <b>Info.</b>                  | Agilent 6224 TOF LC/MS                              |
| <b>MFC</b>                      | C23H35N3O6S                            | <b>Stream Name</b>            | LC 1                                                |
| <b>Acquisition Time (Local)</b> | 9/24/2021 1:18:07 PM (UTC+03:00)       | <b>Acquisition SW Version</b> | 6200 series TOF/6500 series Q-TOF B.08.00 (B8058.0) |
| <b>TOF Driver Version</b>       | 8.00.00                                | <b>TOF Firmware Version</b>   | 8.643                                               |
| <b>Tune Mass Range Max.</b>     | 1700                                   |                               |                                                     |

## Compound Table

| Label                         | Tgt Score | Mass Error (ppm) | Tgt Formula     | Obs. RT | Ref. Mass | Obs. Mass |
|-------------------------------|-----------|------------------|-----------------|---------|-----------|-----------|
| Cpd 1: C23 H35 N3 O6 S; 3.309 | 95.89     | -1.49            | C23 H35 N3 O6 S | 3.309   | 481.2247  | 481.2239  |

| Obs. m/z | Obs. RT | Obs. Mass | Tgt Formula     | Tgt Mass | Tgt Mass Error (ppm) | RT Diff.        | Find Cpds Algorithm |
|----------|---------|-----------|-----------------|----------|----------------------|-----------------|---------------------|
| 985.4372 | 3.309   | 481.2239  | C23 H35 N3 O6 S | 481.2247 | -1.49                | Find By Formula |                     |

## Compound Chromatograms

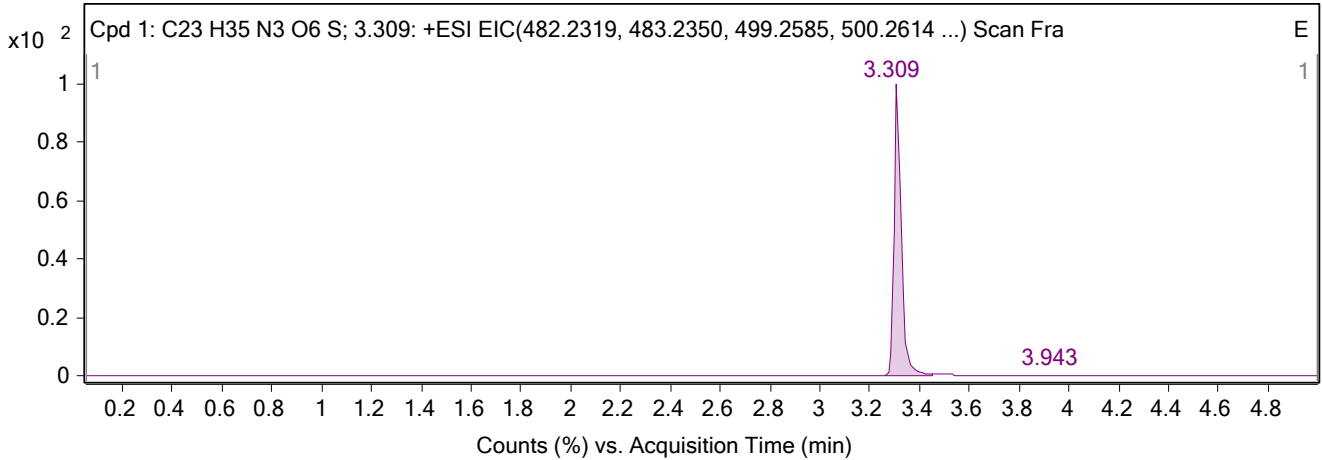

MS Zoomed Spectrum

# Target Compound Screening Report

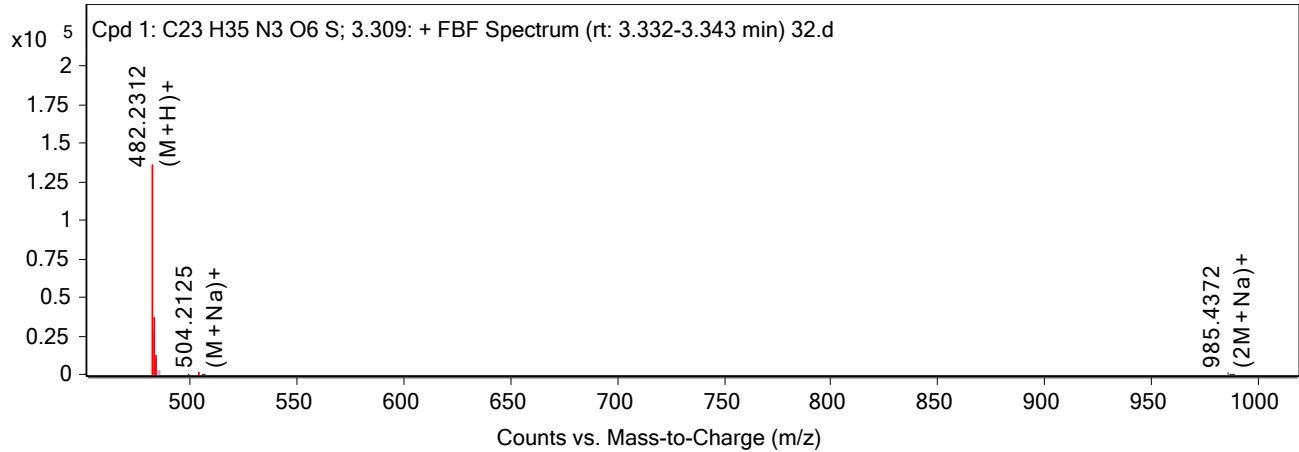

## MS Spectrum Peak List

| Obs. m/z | Charge | Abund     | Ion/Isotope |
|----------|--------|-----------|-------------|
| 482.2312 | 1      | 135358.25 | (M+H)+      |
| 483.2344 | 1      | 29481.96  | (M+H)+      |
| 484.2324 | 1      | 8417.35   | (M+H)+      |
| 504.2125 | 1      | 1516.25   | (M+Na)+     |
| 505.2206 | 1      | 418.9     | (M+Na)+     |
| 506.2149 | 1      | 159.62    | (M+Na)+     |
| 985.4372 | 1      | 1226.35   | (2M+Na)+    |
| 986.4396 | 1      | 608.97    | (2M+Na)+    |
| 987.4422 | 1      | 341.59    | (2M+Na)+    |
| 988.4445 | 1      | 111.44    | (2M+Na)+    |

## MS Zoomed Spectrum

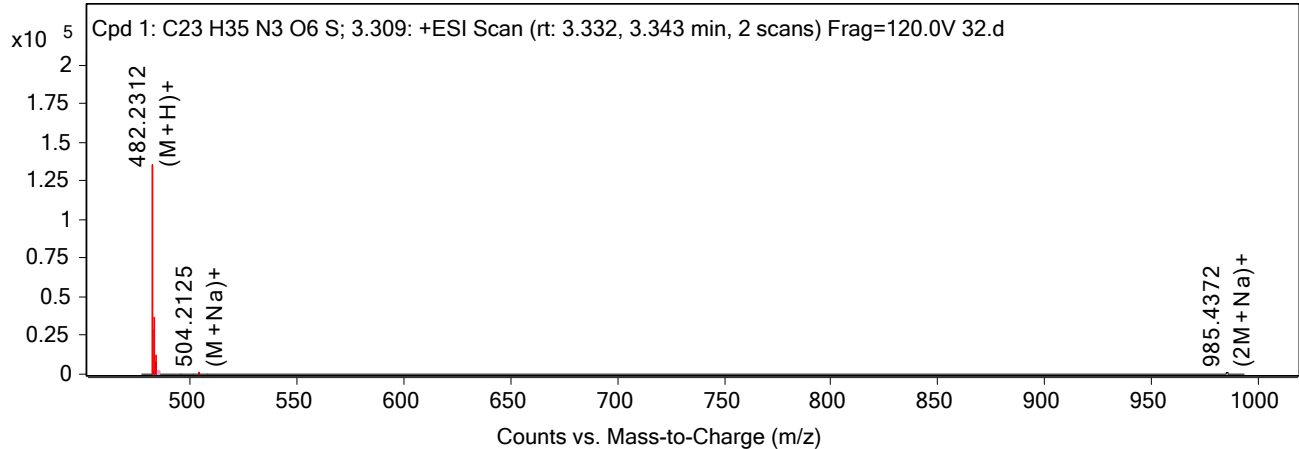

## MS Spectrum Peak List

| Obs. m/z | Charge | Abund     | Ion/Isotope | Tgt Mass Error (ppm) |
|----------|--------|-----------|-------------|----------------------|
| 482.2312 | 1      | 135358.25 | (M+H)+      | 1.62                 |
| 483.2344 | 1      | 29481.96  | (M+H)+      | 1.22                 |
| 484.2324 | 1      | 8417.35   | (M+H)+      | 0.82                 |
| 504.2125 | 1      | 1516.25   | (M+Na)+     | 2.77                 |
| 505.2206 | 1      | 418.9     | (M+Na)+     | -7.32                |
| 506.2149 | 1      | 159.62    | (M+Na)+     | -0.27                |
| 985.4372 | 1      | 1226.35   | (2M+Na)+    | 1.32                 |
| 986.4396 | 1      | 608.97    | (2M+Na)+    | 1.98                 |
| 987.4422 | 1      | 341.59    | (2M+Na)+    | -1.31                |
| 988.4445 | 1      | 111.44    | (2M+Na)+    | -2.8                 |

--- End Of Report ---

# Target Compound Screening Report

|                                 |                                        |                               |                                                     |
|---------------------------------|----------------------------------------|-------------------------------|-----------------------------------------------------|
| <b>Data File</b>                | 39.d                                   | <b>Sample Name</b>            | H2974329                                            |
| <b>Sample Type</b>              | Sample                                 | <b>Position</b>               | P1-E3                                               |
| <b>Instrument Name</b>          | Instrument 1                           | <b>User Name</b>              | Denis V.Bylina                                      |
| <b>Acq Method</b>               | Fast_Gradient_HRMS_pos_Lock_08272019.m | <b>Acquired Time</b>          | 9/24/2021 1:45:47 PM (UTC+03:00)                    |
| <b>IRM Calibration Status</b>   | Success                                | <b>DA Method</b>              | 1.m                                                 |
| <b>Comment</b>                  |                                        |                               |                                                     |
| <b>Sample Group</b>             |                                        | <b>Info.</b>                  | Agilent 6224 TOF LC/MS                              |
| <b>MFC</b>                      | C24H37N3O4S                            | <b>Stream Name</b>            | LC 1                                                |
| <b>Acquisition Time (Local)</b> | 9/24/2021 1:45:47 PM (UTC+03:00)       | <b>Acquisition SW Version</b> | 6200 series TOF/6500 series Q-TOF B.08.00 (B8058.0) |
| <b>TOF Driver Version</b>       | 8.00.00                                | <b>TOF Firmware Version</b>   | 8.643                                               |
| <b>Tune Mass Range Max.</b>     | 1700                                   |                               |                                                     |

## Compound Table

| Label                         | Tgt Score | Mass Error (ppm) | Tgt Formula     | Obs. RT | Ref. Mass | Obs. Mass |
|-------------------------------|-----------|------------------|-----------------|---------|-----------|-----------|
| Cpd 1: C24 H37 N3 O4 S; 3.480 | 94.15     | -1.88            | C24 H37 N3 O4 S | 3.48    | 463.2505  | 463.2496  |

| Obs. m/z | Obs. RT | Obs. Mass | Tgt Formula     | Tgt Mass | Tgt Mass Error (ppm) | RT Diff.        | Find Cpds Algorithm |
|----------|---------|-----------|-----------------|----------|----------------------|-----------------|---------------------|
| 464.2569 | 3.48    | 463.2496  | C24 H37 N3 O4 S | 463.2505 | -1.88                | Find By Formula |                     |

## Compound Chromatograms

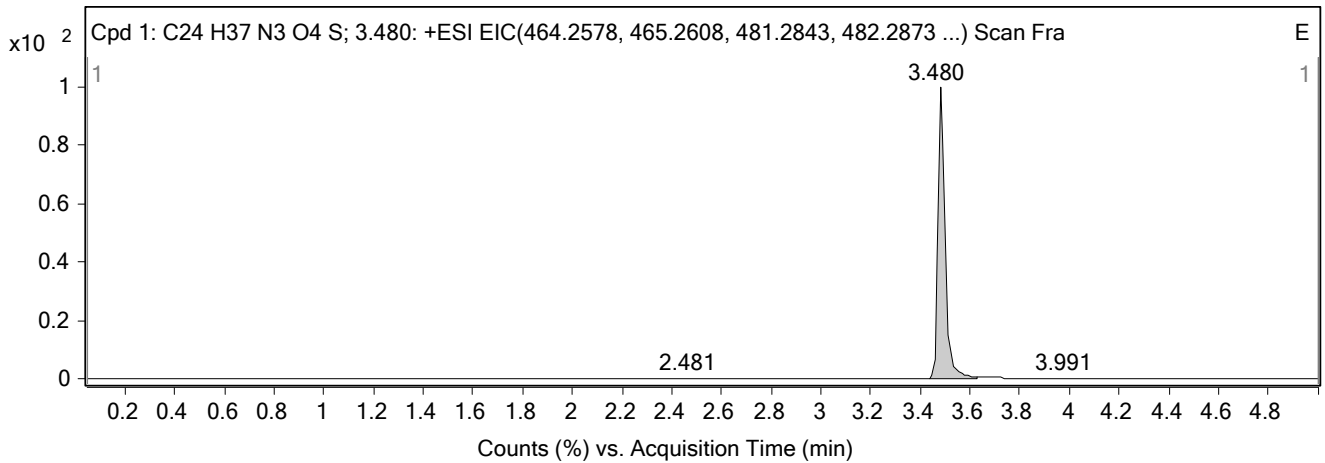

MS Zoomed Spectrum

# Target Compound Screening Report

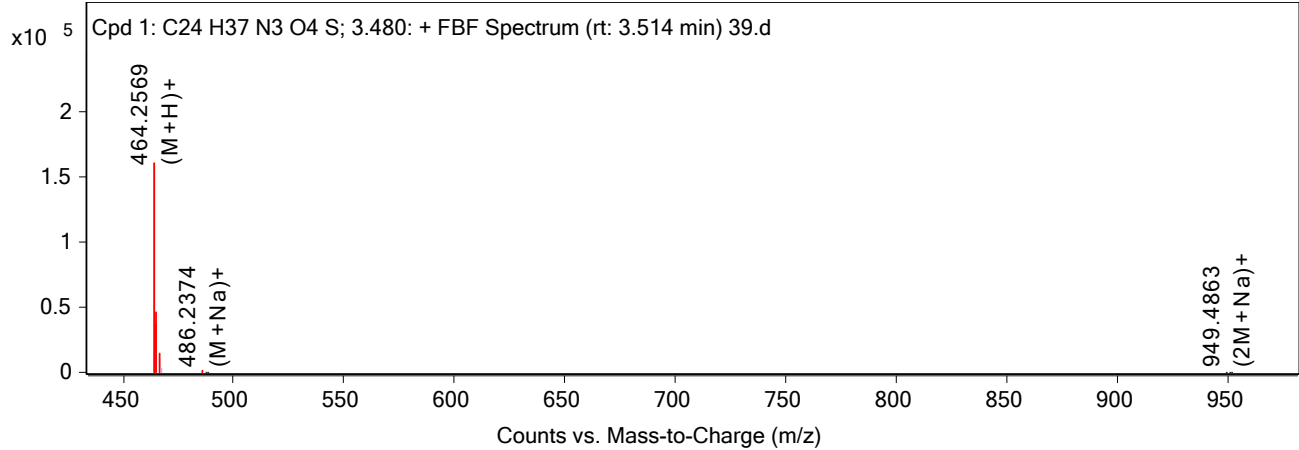

### MS Spectrum Peak List

| Obs. m/z | Charge | Abund     | Ion/Isotope |
|----------|--------|-----------|-------------|
| 464.2569 | 1      | 160267.63 | (M+H)+      |
| 465.2601 | 1      | 37092.69  | (M+H)+      |
| 466.2582 | 1      | 10078     | (M+H)+      |
| 486.2374 | 1      | 1213.17   | (M+Na)+     |
| 487.2437 | 1      | 379.01    | (M+Na)+     |
| 488.227  | 1      | 177.41    | (M+Na)+     |
| 949.4863 | 1      | 342.37    | (2M+Na)+    |
| 950.4861 | 1      | 270.4     | (2M+Na)+    |
| 951.4788 | 1      | 108.56    | (2M+Na)+    |

### MS Zoomed Spectrum

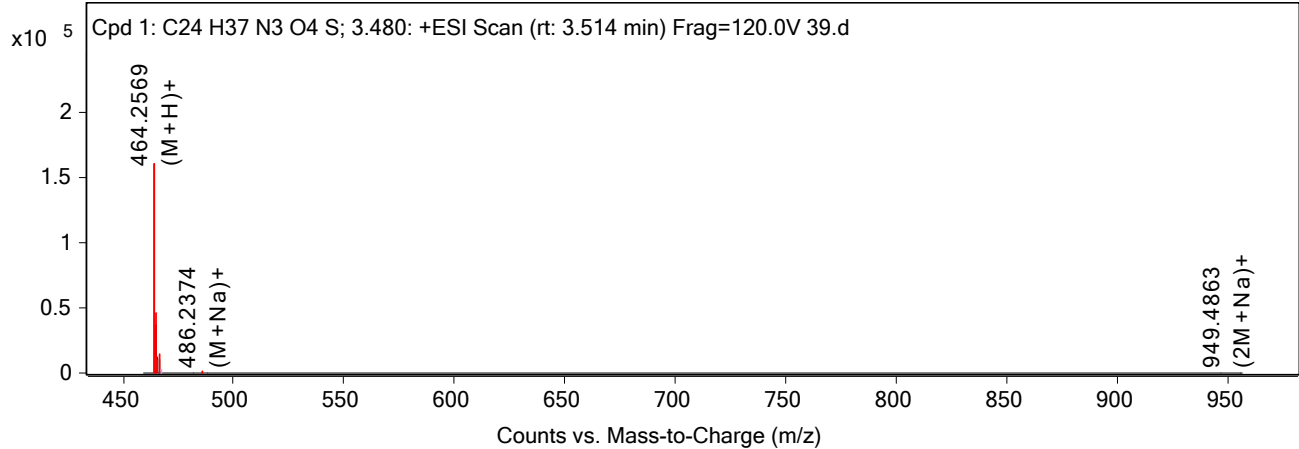

### MS Spectrum Peak List

| Obs. m/z | Charge | Abund     | Ion/Isotope | Tgt Mass Error (ppm) |
|----------|--------|-----------|-------------|----------------------|
| 464.2569 | 1      | 160267.63 | (M+H)+      | 1.92                 |
| 464.2569 |        | 160267.63 |             |                      |
| 465.2601 | 1      | 37092.69  | (M+H)+      | 1.45                 |
| 466.2582 | 1      | 10078     | (M+H)+      | 0.99                 |
| 486.2374 | 1      | 1213.17   | (M+Na)+     | 4.78                 |
| 487.2437 | 1      | 379.01    | (M+Na)+     | -1.98                |
| 488.227  | 1      | 177.41    | (M+Na)+     | 27.9                 |
| 949.4863 | 1      | 342.37    | (2M+Na)+    | 4.09                 |
| 950.4861 | 1      | 270.4     | (2M+Na)+    | 7.54                 |
| 951.4788 | 1      | 108.56    | (2M+Na)+    | 14.59                |

--- End Of Report ---

# Target Compound Screening Report

|                                 |                                        |                               |                                                     |
|---------------------------------|----------------------------------------|-------------------------------|-----------------------------------------------------|
| <b>Data File</b>                | 5d.d                                   | <b>Sample Name</b>            | H3475348                                            |
| <b>Sample Type</b>              | Sample                                 | <b>Position</b>               | P1-C5                                               |
| <b>Instrument Name</b>          | Instrument 1                           | <b>User Name</b>              | Denis V.Bylina                                      |
| <b>Acq Method</b>               | Fast_Gradient_HRMS_pos_Lock_08272019.m | <b>Acquired Time</b>          | 10/7/2021 9:35:38 AM (UTC+03:00)                    |
| <b>IRM Calibration Status</b>   | Success                                | <b>DA Method</b>              | 1.m                                                 |
| <b>Comment</b>                  |                                        |                               |                                                     |
| <b>Sample Group</b>             |                                        | <b>Info.</b>                  | Agilent 6224 TOF LC/MS                              |
| <b>MFC</b>                      | C22H35N3O5S2                           | <b>Stream Name</b>            | LC 1                                                |
| <b>Acquisition Time (Local)</b> | 10/7/2021 9:35:38 AM (UTC+03:00)       | <b>Acquisition SW Version</b> | 6200 series TOF/6500 series Q-TOF B.08.00 (B8058.0) |
| <b>TOF Driver Version</b>       | 8.00.00                                | <b>TOF Firmware Version</b>   | 8.643                                               |
| <b>Tune Mass Range Max.</b>     | 1700                                   |                               |                                                     |

## Compound Table

| Label                          | Tgt Score | Mass Error (ppm) | Tgt Formula      | Obs. RT | Ref. Mass | Obs. Mass |
|--------------------------------|-----------|------------------|------------------|---------|-----------|-----------|
| Cpd 1: C22 H35 N3 O5 S2; 3.417 | 94.61     | -1.57            | C22 H35 N3 O5 S2 | 3.417   | 485.2018  | 485.201   |

| Obs. m/z | Obs. RT | Obs. Mass | Tgt Formula      | Tgt Mass | Tgt Mass Error (ppm) | RT Diff.        | Find Cpds Algorithm |
|----------|---------|-----------|------------------|----------|----------------------|-----------------|---------------------|
| 486.2084 | 3.417   | 485.201   | C22 H35 N3 O5 S2 | 485.2018 | -1.57                | Find By Formula |                     |

## Compound Chromatograms

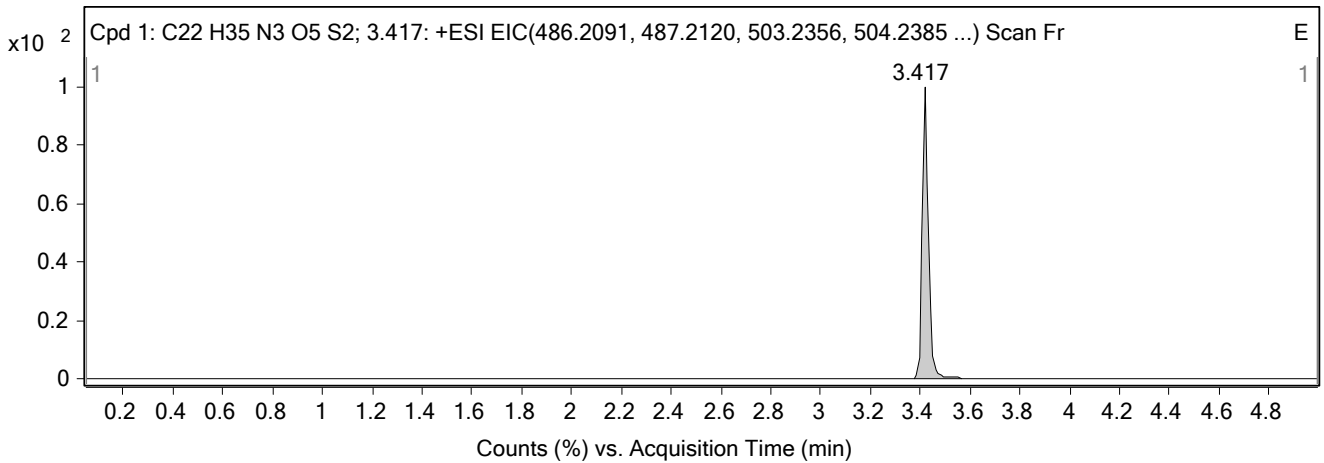

## MS Zoomed Spectrum

# Target Compound Screening Report

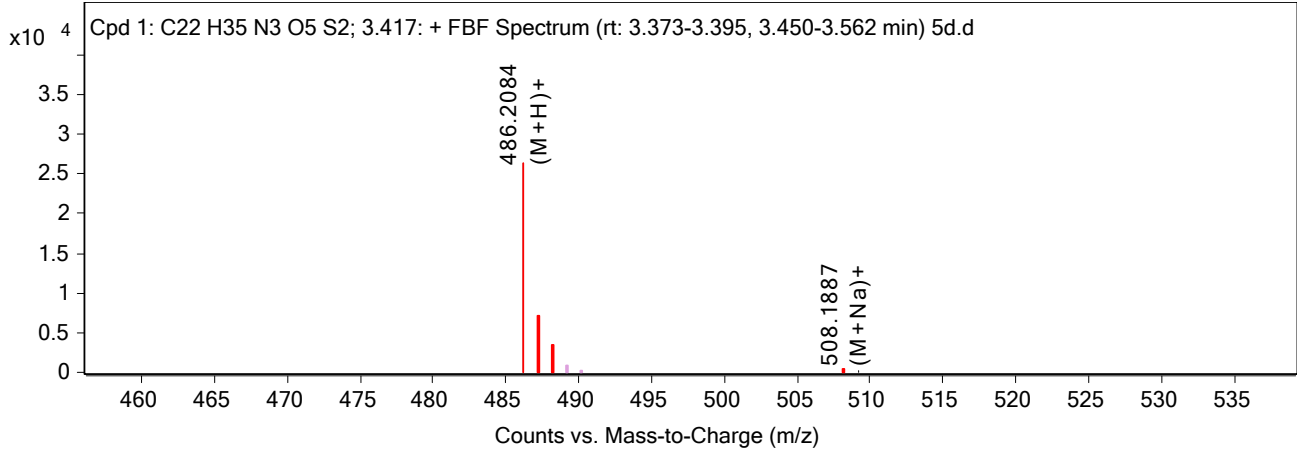

## MS Spectrum Peak List

| Obs. m/z | Charge | Abund    | Ion/Isotope |
|----------|--------|----------|-------------|
| 486.2084 | 1      | 26351.47 | (M+H)+      |
| 487.2112 | 1      | 6152.42  | (M+H)+      |
| 488.2072 | 1      | 2743.54  | (M+H)+      |
| 508.1887 | 1      | 301.12   | (M+Na)+     |
| 509.196  | 1      | 142.46   | (M+Na)+     |

## MS Zoomed Spectrum

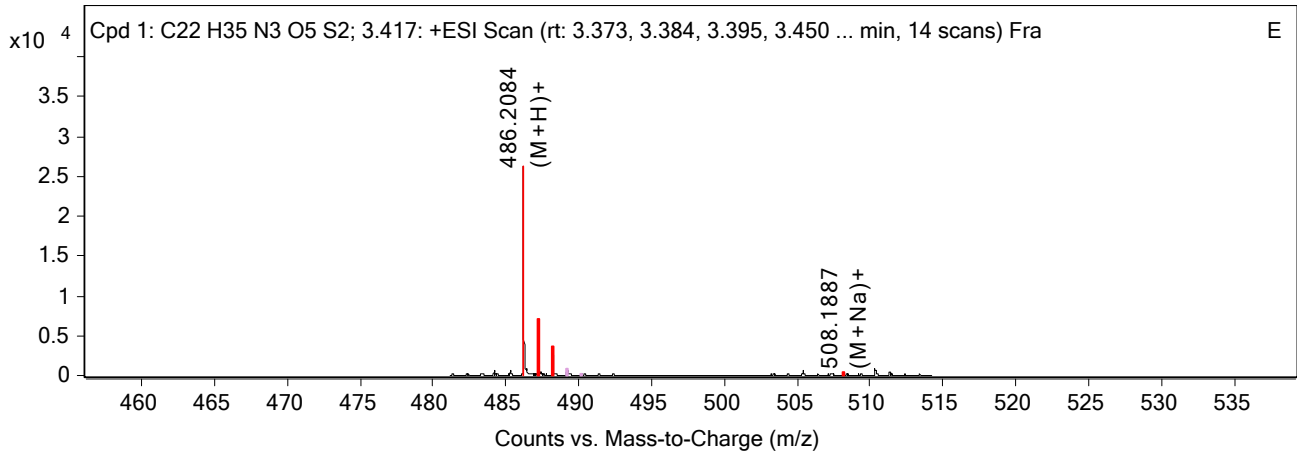

## MS Spectrum Peak List

| Obs. m/z | Charge | Abund    | Ion/Isotope | Tgt Mass Error (ppm) |
|----------|--------|----------|-------------|----------------------|
| 486.2084 | 1      | 26351.47 | (M+H)+      | 1.49                 |
| 487.2112 | 1      | 6152.42  | (M+H)+      | 1.68                 |
| 488.2072 | 1      | 2743.54  | (M+H)+      | 2                    |
| 508.1887 | 1      | 301.12   | (M+Na)+     | 4.56                 |
| 509.196  | 1      | 142.46   | (M+Na)+     | -4.03                |

--- End Of Report ---

# Target Compound Screening Report

|                                 |                                        |                               |                                                     |
|---------------------------------|----------------------------------------|-------------------------------|-----------------------------------------------------|
| <b>Data File</b>                | 47.d                                   | <b>Sample Name</b>            | H2979253                                            |
| <b>Sample Type</b>              | Sample                                 | <b>Position</b>               | P1-F2                                               |
| <b>Instrument Name</b>          | Instrument 1                           | <b>User Name</b>              | Denis V.Bylina                                      |
| <b>Acq Method</b>               | Fast_Gradient_HRMS_pos_Lock_08272019.m | <b>Acquired Time</b>          | 9/22/2021 6:03:26 PM (UTC+03:00)                    |
| <b>IRM Calibration Status</b>   | Success                                | <b>DA Method</b>              | 1.m                                                 |
| <b>Comment</b>                  |                                        |                               |                                                     |
| <b>Sample Group</b>             |                                        | <b>Info.</b>                  | Agilent 6224 TOF LC/MS                              |
| <b>MFC</b>                      | C20H28N2O6S2                           | <b>Stream Name</b>            | LC 1                                                |
| <b>Acquisition Time (Local)</b> | 9/22/2021 6:03:26 PM (UTC+03:00)       | <b>Acquisition SW Version</b> | 6200 series TOF/6500 series Q-TOF B.08.00 (B8058.0) |
| <b>TOF Driver Version</b>       | 8.00.00                                | <b>TOF Firmware Version</b>   | 8.643                                               |
| <b>Tune Mass Range Max.</b>     | 1700                                   |                               |                                                     |

### Compound Table

| Label                          | Tgt Score | Mass Error (ppm) | Tgt Formula      | Obs. RT | Ref. Mass | Obs. Mass |
|--------------------------------|-----------|------------------|------------------|---------|-----------|-----------|
| Cpd 1: C20 H28 N2 O6 S2; 2.926 | 94.44     | -0.94            | C20 H28 N2 O6 S2 | 2.926   | 456.1389  | 456.1384  |

| Obs. m/z | Obs. RT | Obs. Mass | Tgt Formula      | Tgt Mass | Tgt Mass Error (ppm) | RT Diff.        | Find Cpds Algorithm |
|----------|---------|-----------|------------------|----------|----------------------|-----------------|---------------------|
| 479.1274 | 2.926   | 456.1384  | C20 H28 N2 O6 S2 | 456.1389 | -0.94                | Find By Formula |                     |

### Compound Chromatograms

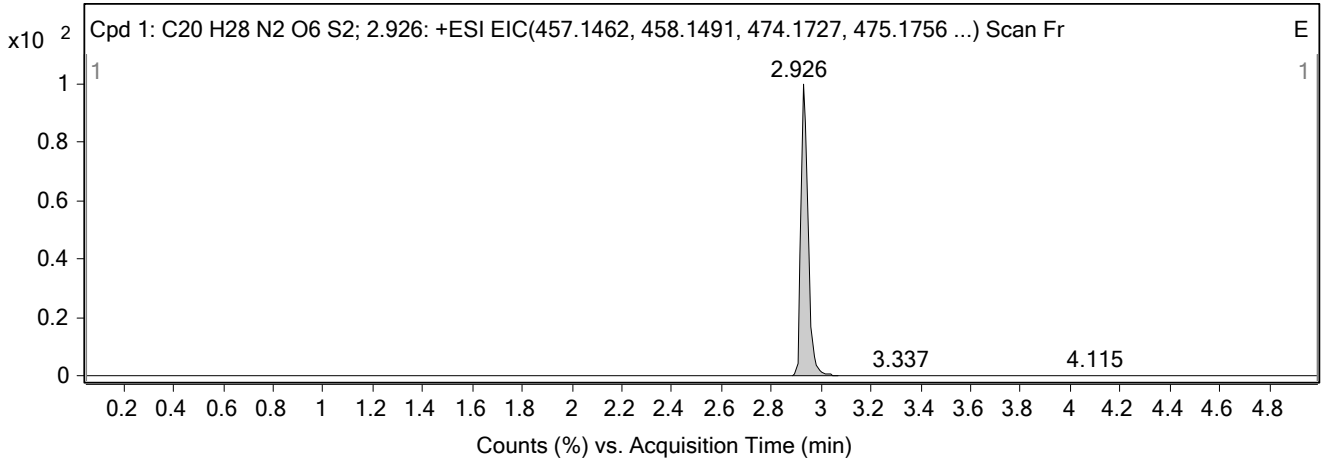

MS Zoomed Spectrum

# Target Compound Screening Report

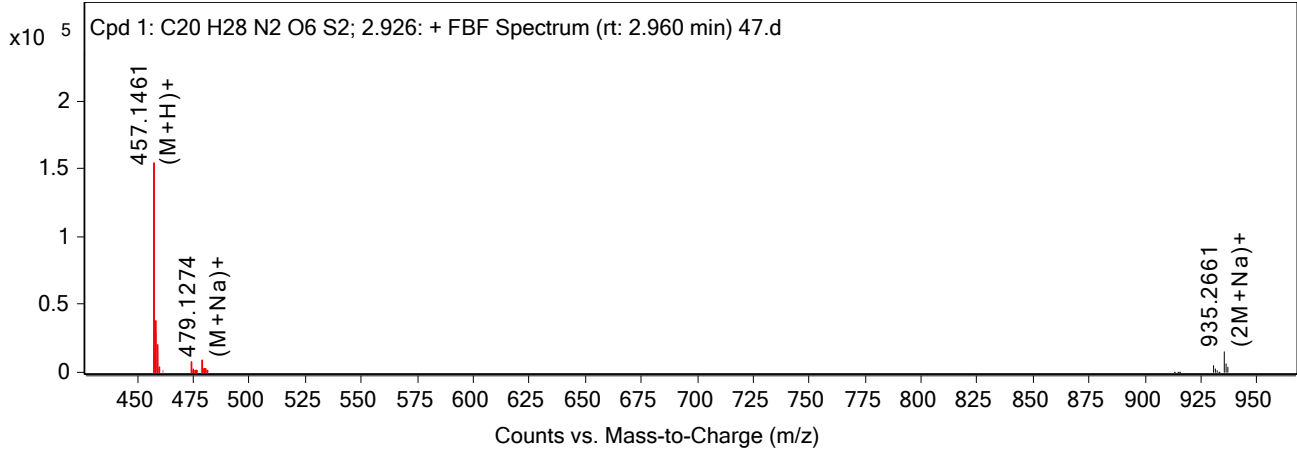

## MS Spectrum Peak List

| Obs. m/z | Charge | Abund     | Ion/Isotope            |
|----------|--------|-----------|------------------------|
| 457.1461 | 1      | 153992.41 | (M+H)+                 |
| 458.1491 | 1      | 29544.45  | (M+H)+                 |
| 459.1451 | 1      | 13558.98  | (M+H)+                 |
| 460.1463 | 1      | 2550.44   | (M+H)+                 |
| 474.1715 | 1      | 7301.85   | (M+NH <sub>4</sub> )+  |
| 479.1274 | 1      | 8310.12   | (M+Na)+                |
| 930.3097 | 1      | 5279.98   | (2M+NH <sub>4</sub> )+ |
| 935.2661 | 1      | 15471.37  | (2M+Na)+               |
| 936.2678 | 1      | 6327.08   | (2M+Na)+               |
| 937.2641 | 1      | 3897.15   | (2M+Na)+               |

## MS Zoomed Spectrum

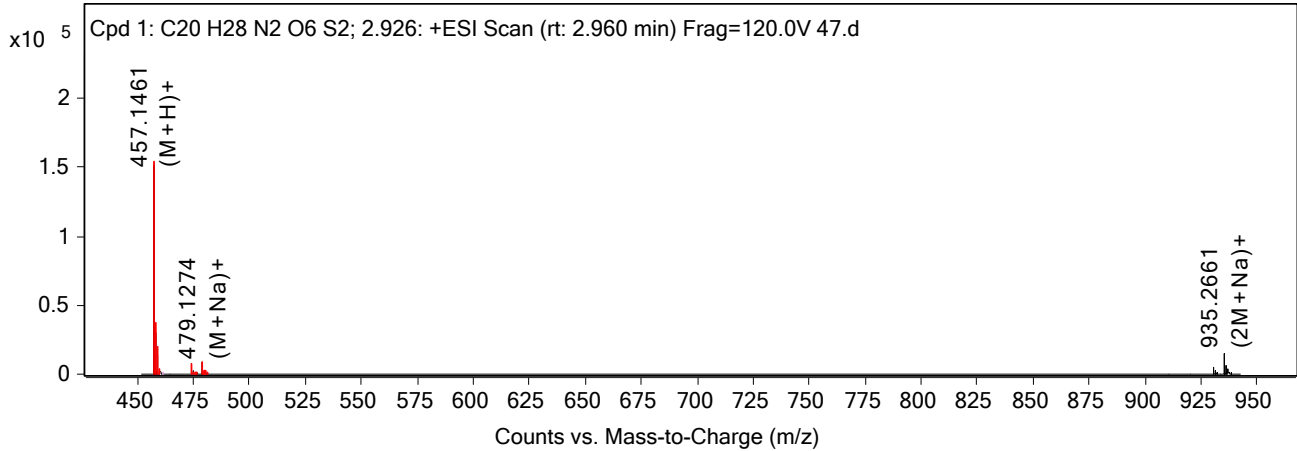

## MS Spectrum Peak List

| Obs. m/z | Charge | Abund     | Ion/Isotope            | Tgt Mass Error (ppm) |
|----------|--------|-----------|------------------------|----------------------|
| 457.1461 | 1      | 153992.41 | (M+H)+                 | 0.2                  |
| 458.1491 | 1      | 29544.45  | (M+H)+                 | -0.03                |
| 459.1451 | 1      | 13558.98  | (M+H)+                 | -0.17                |
| 460.1463 | 1      | 2550.44   | (M+H)+                 | 1.17                 |
| 474.1715 | 1      | 7301.85   | (M+NH <sub>4</sub> )+  | 2.54                 |
| 479.1274 | 1      | 8310.12   | (M+Na)+                | 1.36                 |
| 930.3097 | 1      | 5279.98   | (2M+NH <sub>4</sub> )+ | 1.99                 |
| 935.2661 | 1      | 15471.37  | (2M+Na)+               | 0.94                 |
| 936.2678 | 1      | 6327.08   | (2M+Na)+               | 2.26                 |
| 937.2641 | 1      | 3897.15   | (2M+Na)+               | 3.25                 |

--- End Of Report ---



# Target Compound Screening Report

|                                 |                                        |                               |                                                     |
|---------------------------------|----------------------------------------|-------------------------------|-----------------------------------------------------|
| <b>Data File</b>                | 54.d                                   | <b>Sample Name</b>            | H2974331                                            |
| <b>Sample Type</b>              | Sample                                 | <b>Position</b>               | P1-F9                                               |
| <b>Instrument Name</b>          | Instrument 1                           | <b>User Name</b>              | Denis V.Bylina                                      |
| <b>Acq Method</b>               | Fast_Gradient_HRMS_pos_Lock_08272019.m | <b>Acquired Time</b>          | 9/22/2021 6:42:22 PM (UTC+03:00)                    |
| <b>IRM Calibration Status</b>   | Success                                | <b>DA Method</b>              | 1.m                                                 |
| <b>Comment</b>                  |                                        |                               |                                                     |
| <b>Sample Group</b>             |                                        | <b>Info.</b>                  | Agilent 6224 TOF LC/MS                              |
| <b>MFC</b>                      | C22H34N4O5S2                           | <b>Stream Name</b>            | LC 1                                                |
| <b>Acquisition Time (Local)</b> | 9/22/2021 6:42:22 PM (UTC+03:00)       | <b>Acquisition SW Version</b> | 6200 series TOF/6500 series Q-TOF B.08.00 (B8058.0) |
| <b>TOF Driver Version</b>       | 8.00.00                                | <b>TOF Firmware Version</b>   | 8.643                                               |
| <b>Tune Mass Range Max.</b>     | 1700                                   |                               |                                                     |

## Compound Table

| Label                          | Tgt Score | Mass Error (ppm) | Tgt Formula      | Obs. RT | Ref. Mass | Obs. Mass |
|--------------------------------|-----------|------------------|------------------|---------|-----------|-----------|
| Cpd 1: C22 H34 N4 O5 S2; 2.966 | 94.49     | -0.87            | C22 H34 N4 O5 S2 | 2.966   | 498.1971  | 498.1966  |

| Obs. m/z | Obs. RT | Obs. Mass | Tgt Formula      | Tgt Mass | Tgt Mass Error (ppm) | RT Diff.        | Find Cpds Algorithm |
|----------|---------|-----------|------------------|----------|----------------------|-----------------|---------------------|
| 499.2039 | 2.966   | 498.1966  | C22 H34 N4 O5 S2 | 498.1971 | -0.87                | Find By Formula |                     |

## Compound Chromatograms

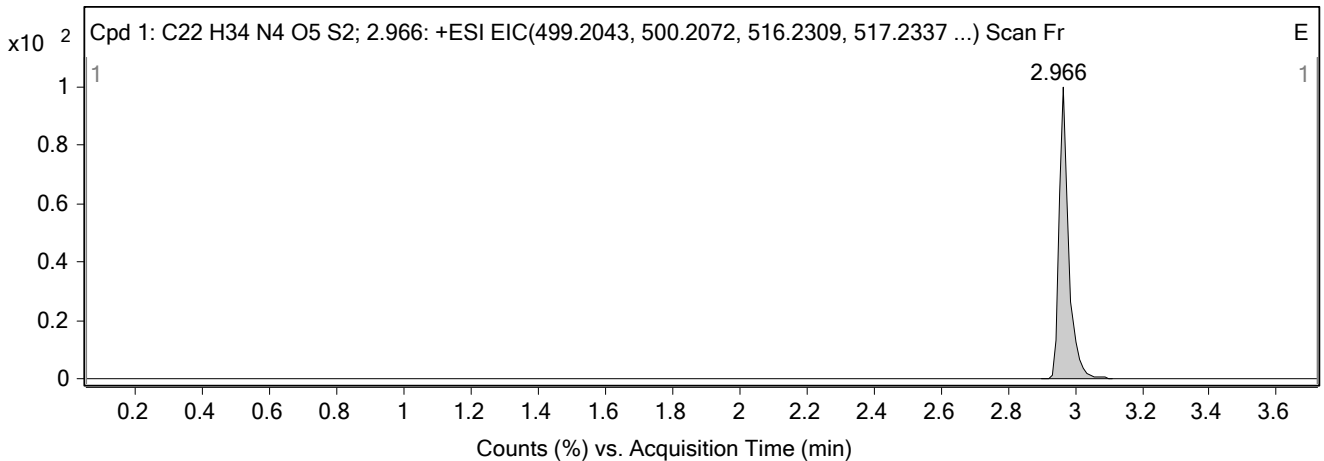

MS Zoomed Spectrum

# Target Compound Screening Report

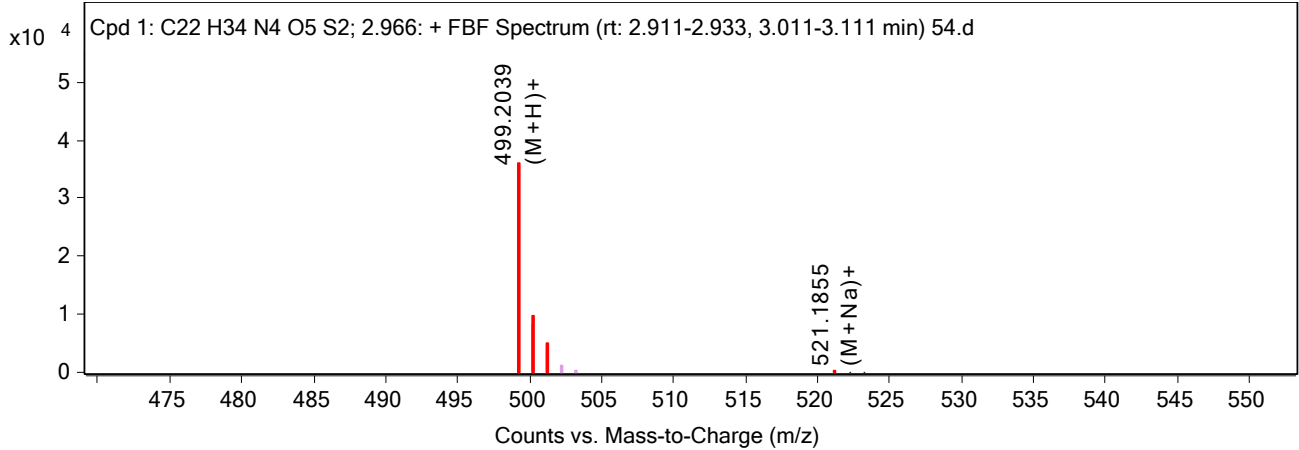

### MS Spectrum Peak List

| Obs. m/z | Charge | Abund    | Ion/Isotope |
|----------|--------|----------|-------------|
| 499.2039 | 1      | 35993.04 | (M+H)+      |
| 500.2065 | 1      | 8148.3   | (M+H)+      |
| 501.2034 | 1      | 3798.41  | (M+H)+      |
| 521.1855 | 1      | 426.13   | (M+Na)+     |
| 522.188  | 1      | 112.24   | (M+Na)+     |
| 523.1963 | 1      | 73.62    | (M+Na)+     |

### MS Zoomed Spectrum

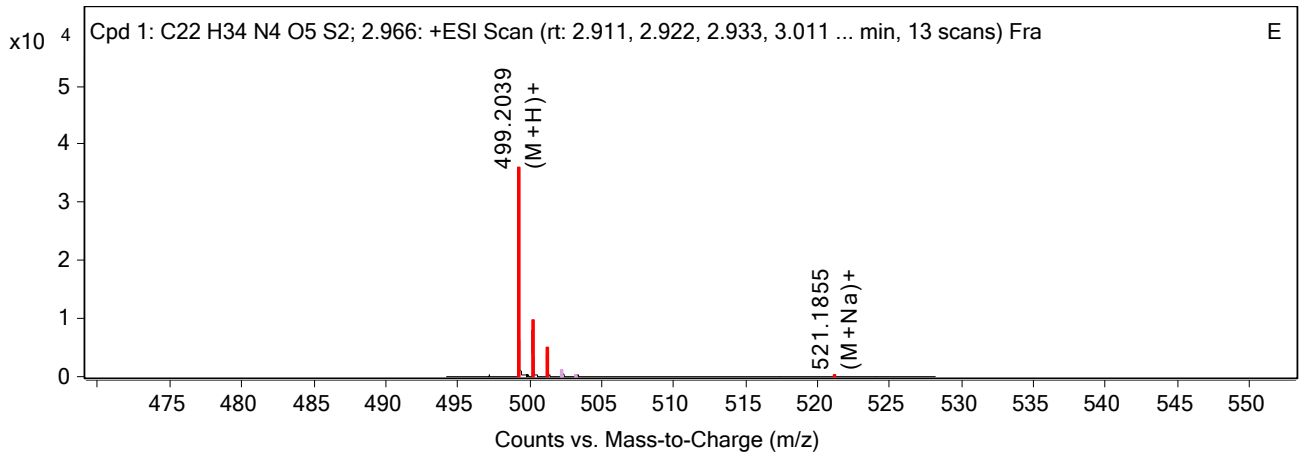

### MS Spectrum Peak List

| Obs. m/z | Charge | Abund    | Ion/Isotope | Tgt Mass Error (ppm) |
|----------|--------|----------|-------------|----------------------|
| 499.2039 | 1      | 35993.04 | (M+H)+      | 0.88                 |
| 500.2065 | 1      | 8148.3   | (M+H)+      | 1.35                 |
| 501.2034 | 1      | 3798.41  | (M+H)+      | -0.02                |
| 521.1855 | 1      | 426.13   | (M+Na)+     | 1.44                 |
| 522.188  | 1      | 112.24   | (M+Na)+     | 2.16                 |
| 523.1963 | 1      | 73.62    | (M+Na)+     | -20.96               |

--- End Of Report ---

# Target Compound Screening Report

|                                 |                                        |                               |                                                     |
|---------------------------------|----------------------------------------|-------------------------------|-----------------------------------------------------|
| <b>Data File</b>                | 11.d                                   | <b>Sample Name</b>            | H2981847                                            |
| <b>Sample Type</b>              | Sample                                 | <b>Position</b>               | P1-B2                                               |
| <b>Instrument Name</b>          | Instrument 1                           | <b>User Name</b>              | Denis V.Bylina                                      |
| <b>Acq Method</b>               | Fast_Gradient_HRMS_pos_Lock_08272019.m | <b>Acquired Time</b>          | 9/24/2021 11:07:04 AM (UTC+03:00)                   |
| <b>IRM Calibration Status</b>   | Success                                | <b>DA Method</b>              | 1.m                                                 |
| <b>Comment</b>                  |                                        |                               |                                                     |
| <b>Sample Group</b>             |                                        | <b>Info.</b>                  | Agilent 6224 TOF LC/MS                              |
| <b>MFC</b>                      | C23H37N3O5S2                           | <b>Stream Name</b>            | LC 1                                                |
| <b>Acquisition Time (Local)</b> | 9/24/2021 11:07:04 AM (UTC+03:00)      | <b>Acquisition SW Version</b> | 6200 series TOF/6500 series Q-TOF B.08.00 (B8058.0) |
| <b>TOF Driver Version</b>       | 8.00.00                                | <b>TOF Firmware Version</b>   | 8.643                                               |
| <b>Tune Mass Range Max.</b>     | 1700                                   |                               |                                                     |

## Compound Table

| Label                          | Tgt Score | Mass Error (ppm) | Tgt Formula      | Obs. RT | Ref. Mass | Obs. Mass |
|--------------------------------|-----------|------------------|------------------|---------|-----------|-----------|
| Cpd 1: C23 H37 N3 O5 S2; 3.480 | 94.07     | -1.1             | C23 H37 N3 O5 S2 | 3.48    | 499.2175  | 499.2169  |

| Obs. m/z | Obs. RT | Obs. Mass | Tgt Formula      | Tgt Mass | Tgt Mass Error (ppm) | RT Diff.        | Find Cpds Algorithm |
|----------|---------|-----------|------------------|----------|----------------------|-----------------|---------------------|
| 500.2242 | 3.48    | 499.2169  | C23 H37 N3 O5 S2 | 499.2175 | -1.1                 | Find By Formula |                     |

## Compound Chromatograms

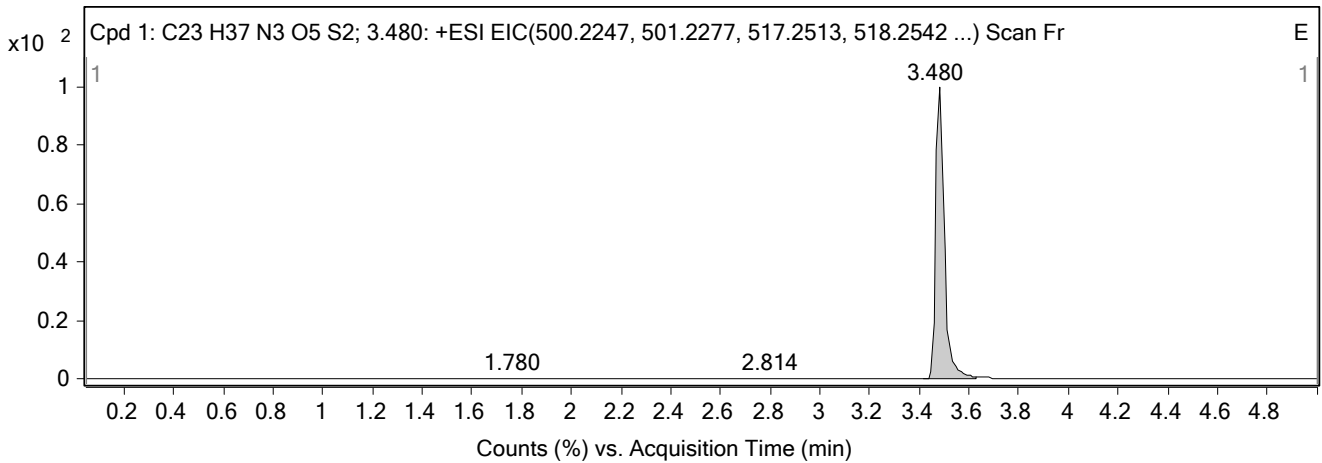

## MS Zoomed Spectrum

# Target Compound Screening Report

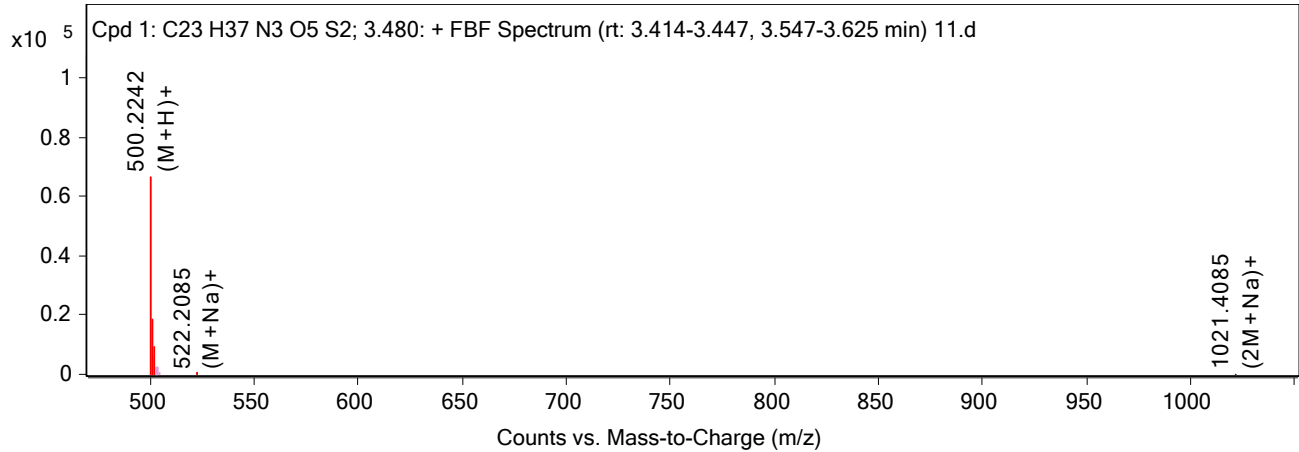

### MS Spectrum Peak List

| Obs. m/z  | Charge | Abund    | Ion/Isotope |
|-----------|--------|----------|-------------|
| 500.2242  | 1      | 66565.27 | (M+H)+      |
| 501.227   | 1      | 15513.76 | (M+H)+      |
| 502.2238  | 1      | 6664.13  | (M+H)+      |
| 522.2085  | 1      | 412.17   | (M+Na)+     |
| 1021.4085 | 1      | 59.4     | (2M+Na)+    |

### MS Zoomed Spectrum

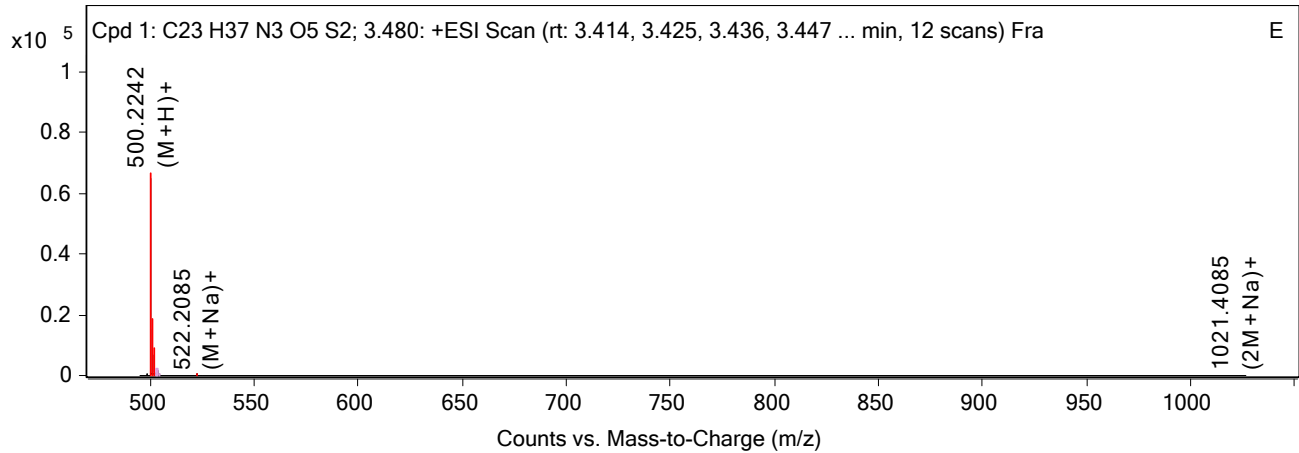

### MS Spectrum Peak List

| Obs. m/z  | Charge | Abund    | Ion/Isotope | Tgt Mass Error (ppm) |
|-----------|--------|----------|-------------|----------------------|
| 500.2242  | 1      | 66565.27 | (M+H)+      | 1.09                 |
| 501.227   | 1      | 15513.76 | (M+H)+      | 1.41                 |
| 502.2238  | 1      | 6664.13  | (M+H)+      | 0.4                  |
| 522.2085  | 1      | 412.17   | (M+Na)+     | -3.56                |
| 1021.4085 | 1      | 59.4     | (2M+Na)+    | 15.33                |

--- End Of Report ---

# Target Compound Screening Report

|                                 |                                        |                               |                                                     |
|---------------------------------|----------------------------------------|-------------------------------|-----------------------------------------------------|
| <b>Data File</b>                | 26.d                                   | <b>Sample Name</b>            | H2979255                                            |
| <b>Sample Type</b>              | Sample                                 | <b>Position</b>               | P1-C8                                               |
| <b>Instrument Name</b>          | Instrument 1                           | <b>User Name</b>              | Denis V.Bylina                                      |
| <b>Acq Method</b>               | Fast_Gradient_HRMS_pos_Lock_08272019.m | <b>Acquired Time</b>          | 9/22/2021 4:06:49 PM (UTC+03:00)                    |
| <b>IRM Calibration Status</b>   | Success                                | <b>DA Method</b>              | 1.m                                                 |
| <b>Comment</b>                  |                                        |                               |                                                     |
| <b>Sample Group</b>             |                                        | <b>Info.</b>                  | Agilent 6224 TOF LC/MS                              |
| <b>MFC</b>                      | C21H30N2O5S2                           | <b>Stream Name</b>            | LC 1                                                |
| <b>Acquisition Time (Local)</b> | 9/22/2021 4:06:49 PM (UTC+03:00)       | <b>Acquisition SW Version</b> | 6200 series TOF/6500 series Q-TOF B.08.00 (B8058.0) |
| <b>TOF Driver Version</b>       | 8.00.00                                | <b>TOF Firmware Version</b>   | 8.643                                               |
| <b>Tune Mass Range Max.</b>     | 1700                                   |                               |                                                     |

## Compound Table

| Label                          | Tgt Score | Mass Error (ppm) | Tgt Formula      | Obs. RT | Ref. Mass | Obs. Mass |
|--------------------------------|-----------|------------------|------------------|---------|-----------|-----------|
| Cpd 1: C21 H30 N2 O5 S2; 3.228 | 96.96     | -0.66            | C21 H30 N2 O5 S2 | 3.228   | 454.1596  | 454.1593  |

| Obs. m/z | Obs. RT | Obs. Mass | Tgt Formula      | Tgt Mass | Tgt Mass Error (ppm) | RT Diff.        | Find Cps Algorithm |
|----------|---------|-----------|------------------|----------|----------------------|-----------------|--------------------|
| 477.1478 | 3.228   | 454.1593  | C21 H30 N2 O5 S2 | 454.1596 | -0.66                | Find By Formula |                    |

## Compound Chromatograms

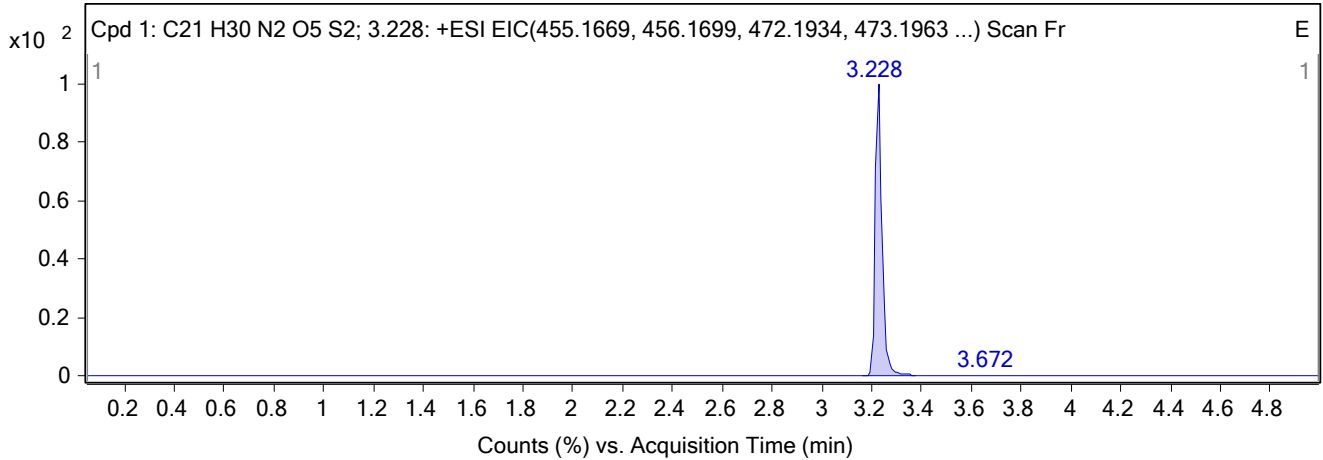

MS Zoomed Spectrum

# Target Compound Screening Report

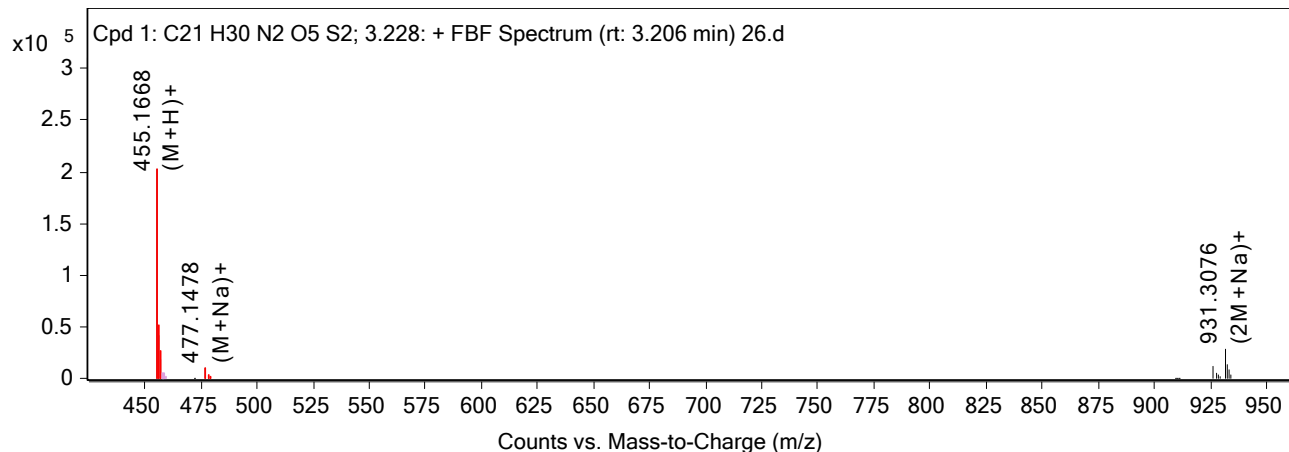

## MS Spectrum Peak List

| Obs. m/z | Charge | Abund     | Ion/Isotope            |
|----------|--------|-----------|------------------------|
| 455.1668 | 1      | 202255.66 | (M+H)+                 |
| 456.1692 | 1      | 41929.46  | (M+H)+                 |
| 457.1664 | 1      | 17927.61  | (M+H)+                 |
| 477.1478 | 1      | 10232.1   | (M+Na)+                |
| 926.3523 | 1      | 11084.71  | (2M+NH <sub>4</sub> )+ |
| 927.354  | 1      | 5344.25   | (2M+NH <sub>4</sub> )+ |
| 928.3508 | 1      | 3687.02   | (2M+NH <sub>4</sub> )+ |
| 931.3076 | 1      | 28910     | (2M+Na)+               |
| 932.311  | 1      | 13106.23  | (2M+Na)+               |
| 933.3094 | 1      | 7915.01   | (2M+Na)+               |

## MS Zoomed Spectrum

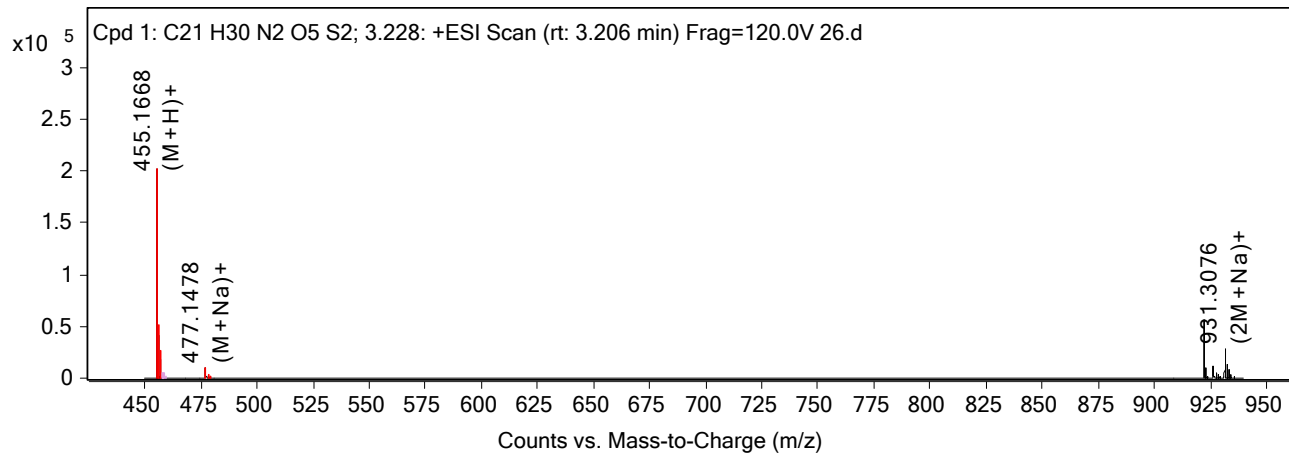

## MS Spectrum Peak List

| Obs. m/z | Charge | Abund     | Ion/Isotope            | Tgt Mass Error (ppm) |
|----------|--------|-----------|------------------------|----------------------|
| 455.1668 | 1      | 202255.66 | (M+H)+                 | 0.16                 |
| 456.1692 | 1      | 41929.46  | (M+H)+                 | 1.43                 |
| 457.1664 | 1      | 17927.61  | (M+H)+                 | -1.37                |
| 477.1478 | 1      | 10232.1   | (M+Na)+                | 2.22                 |
| 926.3523 | 1      | 11084.71  | (2M+NH <sub>4</sub> )+ | 0.83                 |
| 927.354  | 1      | 5344.25   | (2M+NH <sub>4</sub> )+ | 2.15                 |
| 928.3508 | 1      | 3687.02   | (2M+NH <sub>4</sub> )+ | 2.77                 |
| 931.3076 | 1      | 28910     | (2M+Na)+               | 0.88                 |
| 932.311  | 1      | 13106.23  | (2M+Na)+               | 0.44                 |
| 933.3094 | 1      | 7915.01   | (2M+Na)+               | -0.71                |

--- End Of Report ---

# Target Compound Screening Report

|                                 |                                        |                               |                                                     |
|---------------------------------|----------------------------------------|-------------------------------|-----------------------------------------------------|
| <b>Data File</b>                | 45.d                                   | <b>Sample Name</b>            | H2979248                                            |
| <b>Sample Type</b>              | Sample                                 | <b>Position</b>               | P1-E9                                               |
| <b>Instrument Name</b>          | Instrument 1                           | <b>User Name</b>              | Denis V.Bylina                                      |
| <b>Acq Method</b>               | Fast_Gradient_HRMS_pos_Lock_08272019.m | <b>Acquired Time</b>          | 9/23/2021 3:21:00 PM (UTC+03:00)                    |
| <b>IRM Calibration Status</b>   | Success                                | <b>DA Method</b>              | 1.m                                                 |
| <b>Comment</b>                  |                                        |                               |                                                     |
| <b>Sample Group</b>             |                                        | <b>Info.</b>                  | Agilent 6224 TOF LC/MS                              |
| <b>MFC</b>                      | C22H31N3O5S2                           | <b>Stream Name</b>            | LC 1                                                |
| <b>Acquisition Time (Local)</b> | 9/23/2021 3:21:00 PM (UTC+03:00)       | <b>Acquisition SW Version</b> | 6200 series TOF/6500 series Q-TOF B.08.00 (B8058.0) |
| <b>TOF Driver Version</b>       | 8.00.00                                | <b>TOF Firmware Version</b>   | 8.643                                               |
| <b>Tune Mass Range Max.</b>     | 1700                                   |                               |                                                     |

## Compound Table

| Label                          | Tgt Score | Mass Error (ppm) | Tgt Formula      | Obs. RT | Ref. Mass | Obs. Mass |
|--------------------------------|-----------|------------------|------------------|---------|-----------|-----------|
| Cpd 1: C22 H31 N3 O5 S2; 3.275 | 94.3      | -0.62            | C22 H31 N3 O5 S2 | 3.275   | 481.1705  | 481.1702  |

| Obs. m/z | Obs. RT | Obs. Mass | Tgt Formula      | Tgt Mass | Tgt Mass Error (ppm) | RT Diff.        | Find Cps Algorithm |
|----------|---------|-----------|------------------|----------|----------------------|-----------------|--------------------|
| 482.1776 | 3.275   | 481.1702  | C22 H31 N3 O5 S2 | 481.1705 | -0.62                | Find By Formula |                    |

## Compound Chromatograms

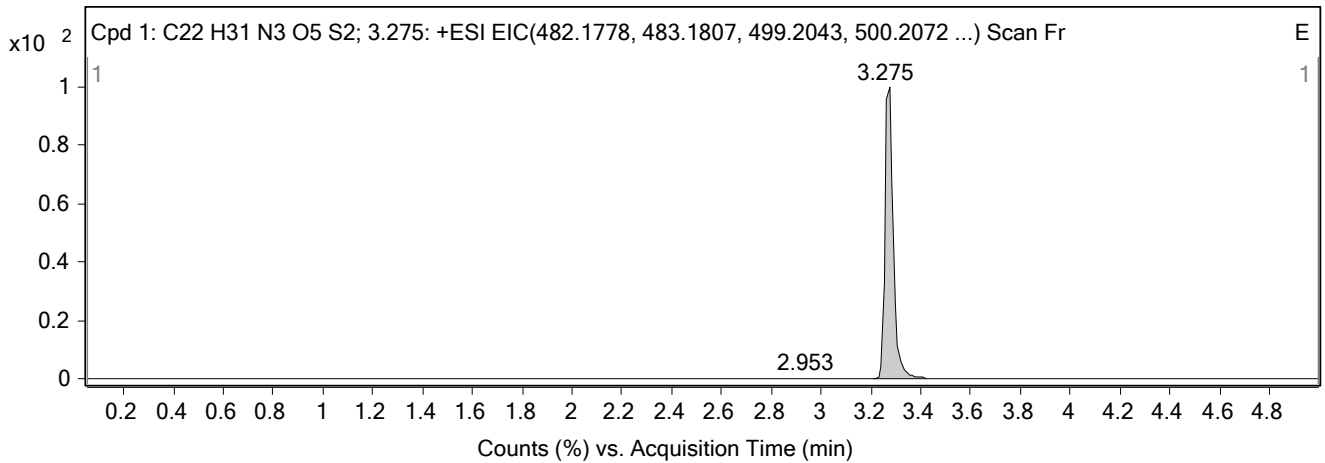

MS Zoomed Spectrum

# Target Compound Screening Report

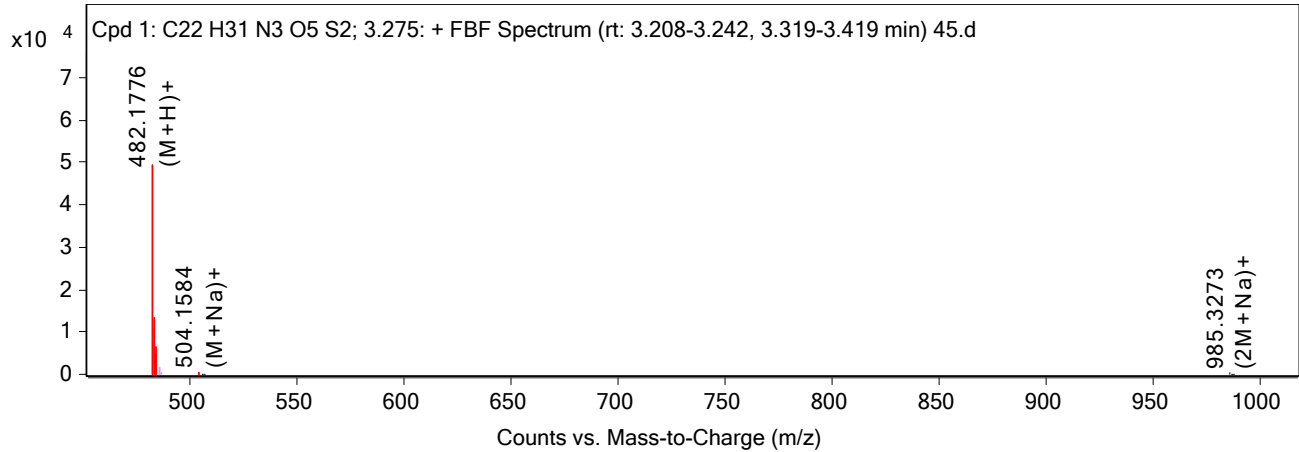

## MS Spectrum Peak List

| Obs. m/z | Charge | Abund    | Ion/Isotope |
|----------|--------|----------|-------------|
| 482.1776 | 1      | 49314.06 | (M+H)+      |
| 483.1804 | 1      | 10892.37 | (M+H)+      |
| 484.1762 | 1      | 4877.44  | (M+H)+      |
| 504.1584 | 1      | 560.66   | (M+Na)+     |
| 505.1602 | 1      | 153.51   | (M+Na)+     |
| 506.1607 | 1      | 92.28    | (M+Na)+     |
| 985.3273 | 1      | 227      | (2M+Na)+    |
| 986.328  | 1      | 122.96   | (2M+Na)+    |
| 987.3223 | 1      | 85.73    | (2M+Na)+    |

## MS Zoomed Spectrum

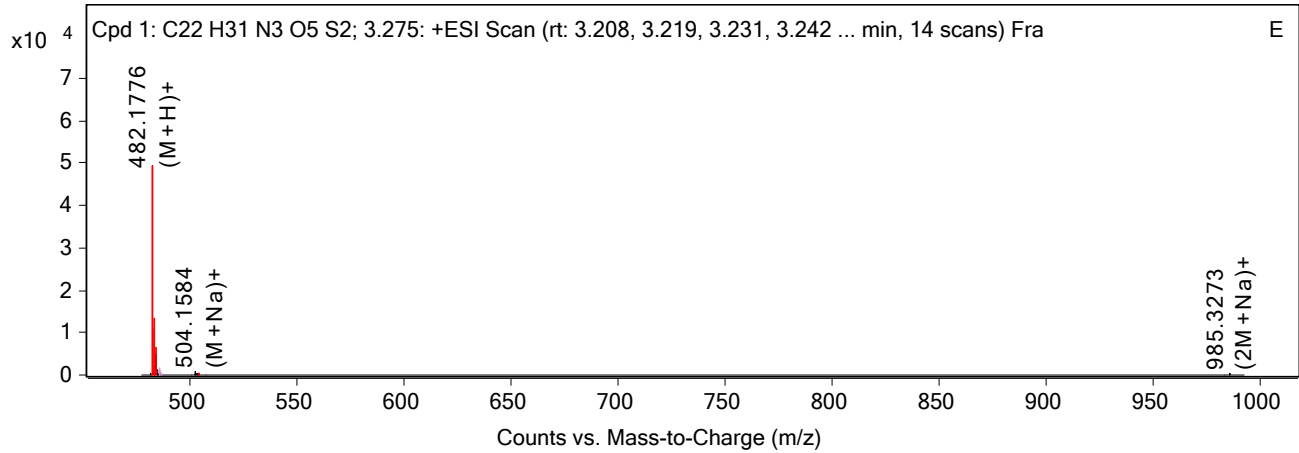

## MS Spectrum Peak List

| Obs. m/z | Charge | Abund    | Ion/Isotope | Tgt Mass Error (ppm) |
|----------|--------|----------|-------------|----------------------|
| 482.1776 | 1      | 49314.06 | (M+H)+      | 0.42                 |
| 483.1804 | 1      | 10892.37 | (M+H)+      | 0.69                 |
| 484.1762 | 1      | 4877.44  | (M+H)+      | 1.34                 |
| 504.1584 | 1      | 560.66   | (M+Na)+     | 2.69                 |
| 505.1602 | 1      | 153.51   | (M+Na)+     | 4.82                 |
| 506.1607 | 1      | 92.28    | (M+Na)+     | -3.83                |
| 985.3273 | 1      | 227      | (2M+Na)+    | 3.04                 |
| 986.328  | 1      | 122.96   | (2M+Na)+    | 5.2                  |
| 987.3223 | 1      | 85.73    | (2M+Na)+    | 8.56                 |

--- End Of Report ---



# Target Compound Screening Report

|                                 |                                        |                               |                                                     |
|---------------------------------|----------------------------------------|-------------------------------|-----------------------------------------------------|
| <b>Data File</b>                | 40.d                                   | <b>Sample Name</b>            | H2974330                                            |
| <b>Sample Type</b>              | Sample                                 | <b>Position</b>               | P1-E4                                               |
| <b>Instrument Name</b>          | Instrument 1                           | <b>User Name</b>              | Denis V.Bylina                                      |
| <b>Acq Method</b>               | Fast_Gradient_HRMS_pos_Lock_08272019.m | <b>Acquired Time</b>          | 9/22/2021 5:24:33 PM (UTC+03:00)                    |
| <b>IRM Calibration Status</b>   | Success                                | <b>DA Method</b>              | 1.m                                                 |
| <b>Comment</b>                  |                                        |                               |                                                     |
| <b>Sample Group</b>             |                                        | <b>Info.</b>                  | Agilent 6224 TOF LC/MS                              |
| <b>MFC</b>                      | C22H36N4O5S2                           | <b>Stream Name</b>            | LC 1                                                |
| <b>Acquisition Time (Local)</b> | 9/22/2021 5:24:33 PM (UTC+03:00)       | <b>Acquisition SW Version</b> | 6200 series TOF/6500 series Q-TOF B.08.00 (B8058.0) |
| <b>TOF Driver Version</b>       | 8.00.00                                | <b>TOF Firmware Version</b>   | 8.643                                               |
| <b>Tune Mass Range Max.</b>     | 1700                                   |                               |                                                     |

## Compound Table

| Label                          | Tgt Score | Mass Error (ppm) | Tgt Formula      | Obs. RT | Ref. Mass | Obs. Mass |
|--------------------------------|-----------|------------------|------------------|---------|-----------|-----------|
| Cpd 1: C22 H36 N4 O5 S2; 3.082 | 95.17     | -0.85            | C22 H36 N4 O5 S2 | 3.082   | 500.2127  | 500.2123  |

| Obs. m/z | Obs. RT | Obs. Mass | Tgt Formula      | Tgt Mass | Tgt Mass Error (ppm) | RT Diff.        | Find Cps Algorithm |
|----------|---------|-----------|------------------|----------|----------------------|-----------------|--------------------|
| 501.2196 | 3.082   | 500.2123  | C22 H36 N4 O5 S2 | 500.2127 | -0.85                | Find By Formula |                    |

## Compound Chromatograms

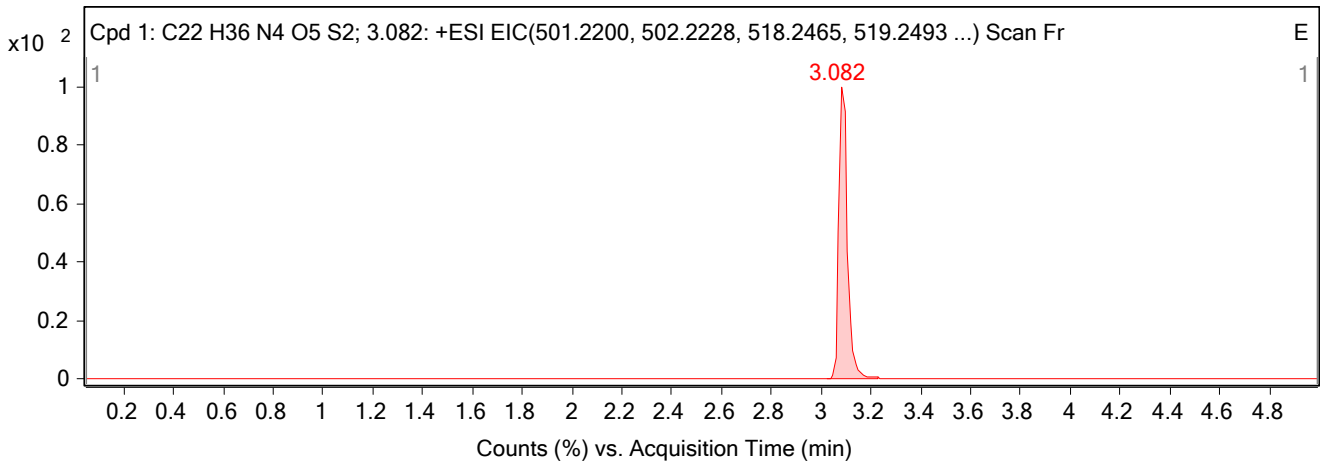

## MS Zoomed Spectrum

# Target Compound Screening Report

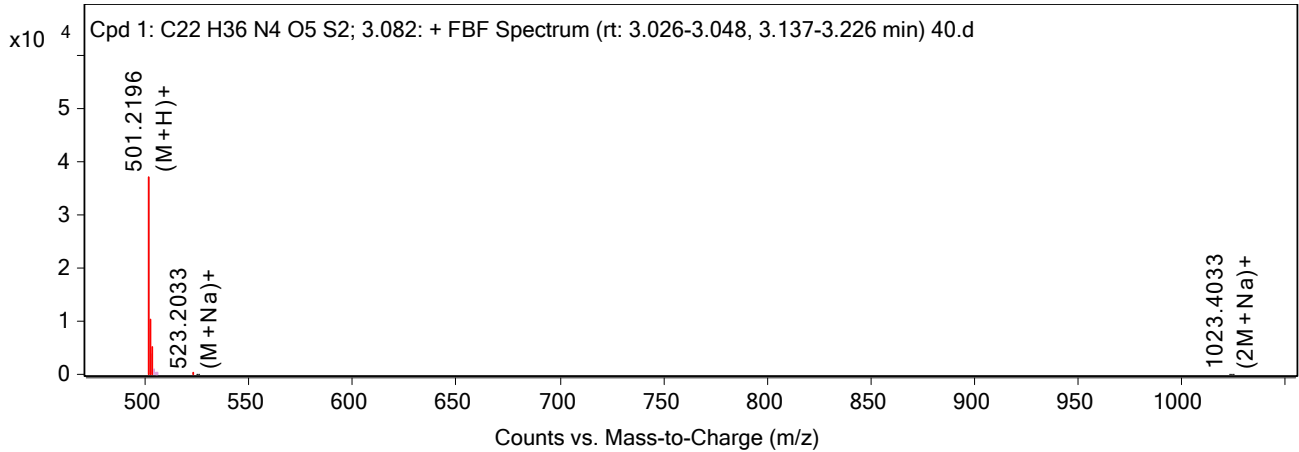

### MS Spectrum Peak List

| Obs. m/z  | Charge | Abund   | Ion/Isotope |
|-----------|--------|---------|-------------|
| 501.2196  | 1      | 37159   | (M+H)+      |
| 502.2225  | 1      | 8667.16 | (M+H)+      |
| 503.2185  | 1      | 3795.55 | (M+H)+      |
| 523.2033  | 1      | 313.92  | (M+Na)+     |
| 524.2044  | 1      | 101.09  | (M+Na)+     |
| 525.2014  | 1      | 49.72   | (M+Na)+     |
| 1023.4033 | 1      | 128.47  | (2M+Na)+    |
| 1024.4123 | 1      | 76.24   | (2M+Na)+    |
| 1025.4111 | 1      | 51.31   | (2M+Na)+    |

### MS Zoomed Spectrum

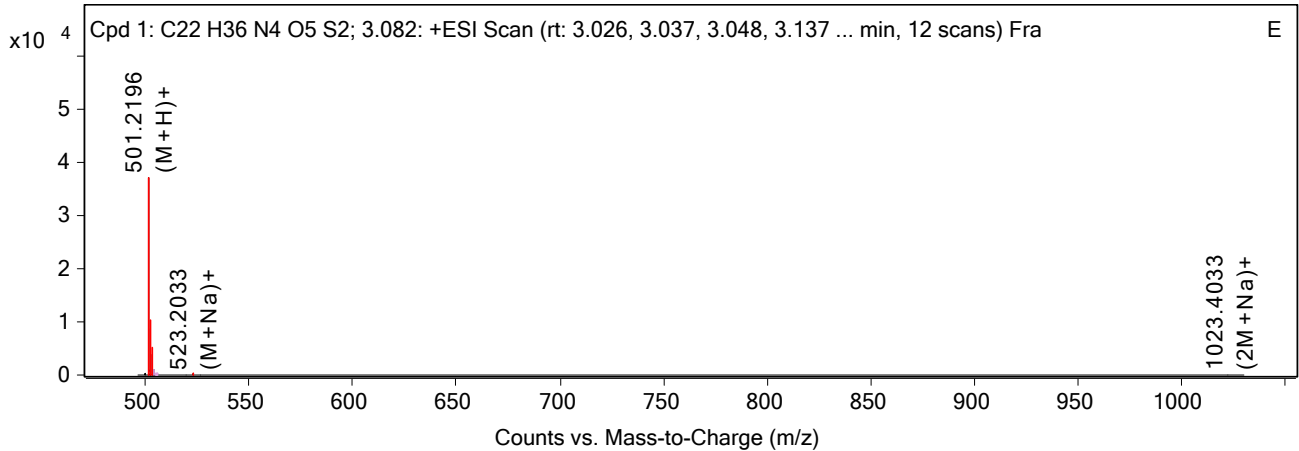

### MS Spectrum Peak List

| Obs. m/z  | Charge | Abund   | Ion/Isotope | Tgt Mass Error (ppm) |
|-----------|--------|---------|-------------|----------------------|
| 501.2196  | 1      | 37159   | (M+H)+      | 0.79                 |
| 502.2225  | 1      | 8667.16 | (M+H)+      | 0.71                 |
| 503.2185  | 1      | 3795.55 | (M+H)+      | 1.1                  |
| 523.2033  | 1      | 313.92  | (M+Na)+     | -2.68                |
| 524.2044  | 1      | 101.09  | (M+Na)+     | 0.8                  |
| 525.2014  | 1      | 49.72   | (M+Na)+     | -0.68                |
| 1023.4033 | 1      | 128.47  | (2M+Na)+    | 11.07                |
| 1024.4123 | 1      | 76.24   | (2M+Na)+    | 5.04                 |
| 1025.4111 | 1      | 51.31   | (2M+Na)+    | 3.94                 |

--- End Of Report ---

# Target Compound Screening Report

|                                 |                                        |                               |                                                     |
|---------------------------------|----------------------------------------|-------------------------------|-----------------------------------------------------|
| <b>Data File</b>                | 35.d                                   | <b>Sample Name</b>            | H2979306                                            |
| <b>Sample Type</b>              | Sample                                 | <b>Position</b>               | P1-D8                                               |
| <b>Instrument Name</b>          | Instrument 1                           | <b>User Name</b>              | Denis V.Bylina                                      |
| <b>Acq Method</b>               | Fast_Gradient_HRMS_pos_Lock_08272019.m | <b>Acquired Time</b>          | 9/22/2021 4:56:49 PM (UTC+03:00)                    |
| <b>IRM Calibration Status</b>   | Success                                | <b>DA Method</b>              | 1.m                                                 |
| <b>Comment</b>                  |                                        |                               |                                                     |
| <b>Sample Group</b>             |                                        | <b>Info.</b>                  | Agilent 6224 TOF LC/MS                              |
| <b>MFC</b>                      | C22H32FN3O4S                           | <b>Stream Name</b>            | LC 1                                                |
| <b>Acquisition Time (Local)</b> | 9/22/2021 4:56:49 PM (UTC+03:00)       | <b>Acquisition SW Version</b> | 6200 series TOF/6500 series Q-TOF B.08.00 (B8058.0) |
| <b>TOF Driver Version</b>       | 8.00.00                                | <b>TOF Firmware Version</b>   | 8.643                                               |
| <b>Tune Mass Range Max.</b>     | 1700                                   |                               |                                                     |

## Compound Table

| Label                           | Tgt Score | Mass Error (ppm) | Tgt Formula       | Obs. RT | Ref. Mass | Obs. Mass |
|---------------------------------|-----------|------------------|-------------------|---------|-----------|-----------|
| Cpd 1: C22 H32 F N3 O4 S; 3.271 | 96.57     | -0.29            | C22 H32 F N3 O4 S | 3.271   | 453.2098  | 453.2096  |

| Obs. m/z | Obs. RT | Obs. Mass | Tgt Formula       | Tgt Mass | Tgt Mass Error (ppm) | RT Diff.        | Find Cpds Algorithm |
|----------|---------|-----------|-------------------|----------|----------------------|-----------------|---------------------|
| 454.2167 | 3.271   | 453.2096  | C22 H32 F N3 O4 S | 453.2098 | -0.29                | Find By Formula |                     |

## Compound Chromatograms

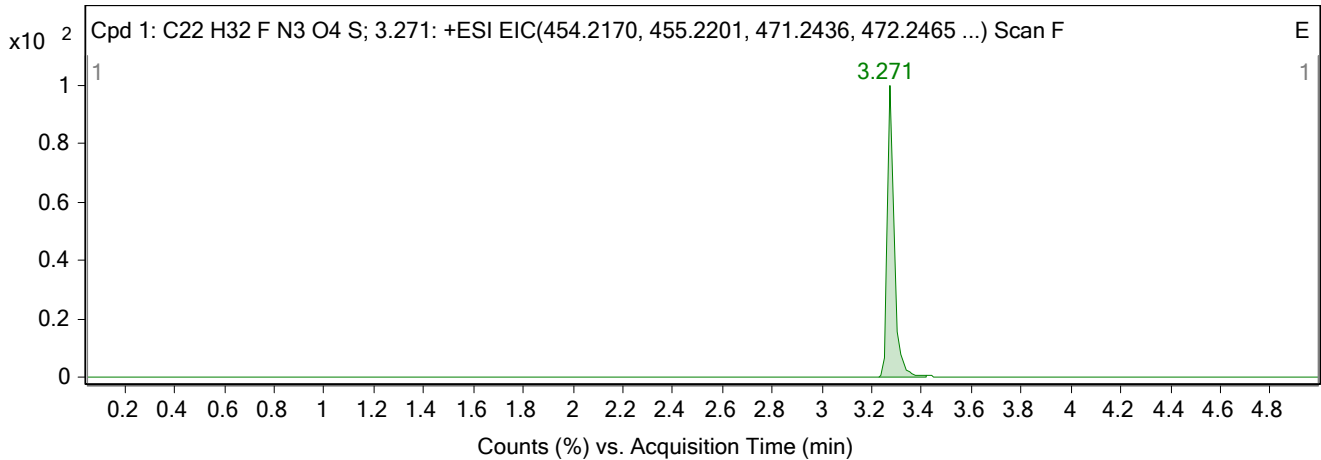

MS Zoomed Spectrum

# Target Compound Screening Report

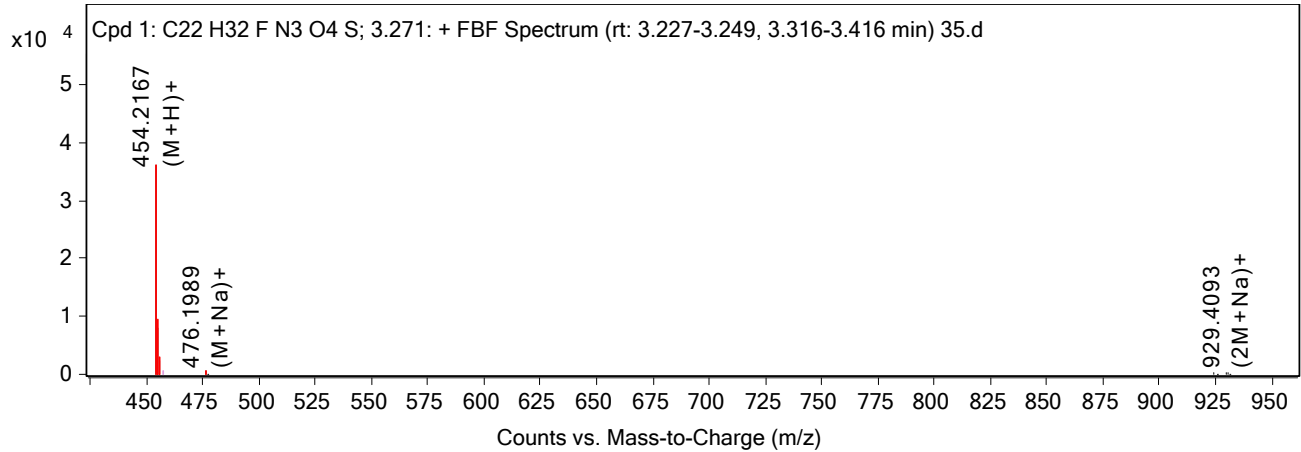

## MS Spectrum Peak List

| Obs. m/z | Charge | Abund    | Ion/Isotope |
|----------|--------|----------|-------------|
| 454.2167 | 1      | 36111.81 | (M+H)+      |
| 455.2196 | 1      | 8070.88  | (M+H)+      |
| 456.2171 | 1      | 2248.47  | (M+H)+      |
| 476.1989 | 1      | 533.9    | (M+Na)+     |
| 477.2039 | 1      | 145.14   | (M+Na)+     |
| 924.4786 | 1      | 226.52   | (2M+NH4)+   |
| 925.4775 | 1      | 154.61   | (2M+NH4)+   |
| 929.4093 | 1      | 332.05   | (2M+Na)+    |
| 930.4129 | 1      | 209.89   | (2M+Na)+    |
| 931.4089 | 1      | 113.38   | (2M+Na)+    |

## MS Zoomed Spectrum

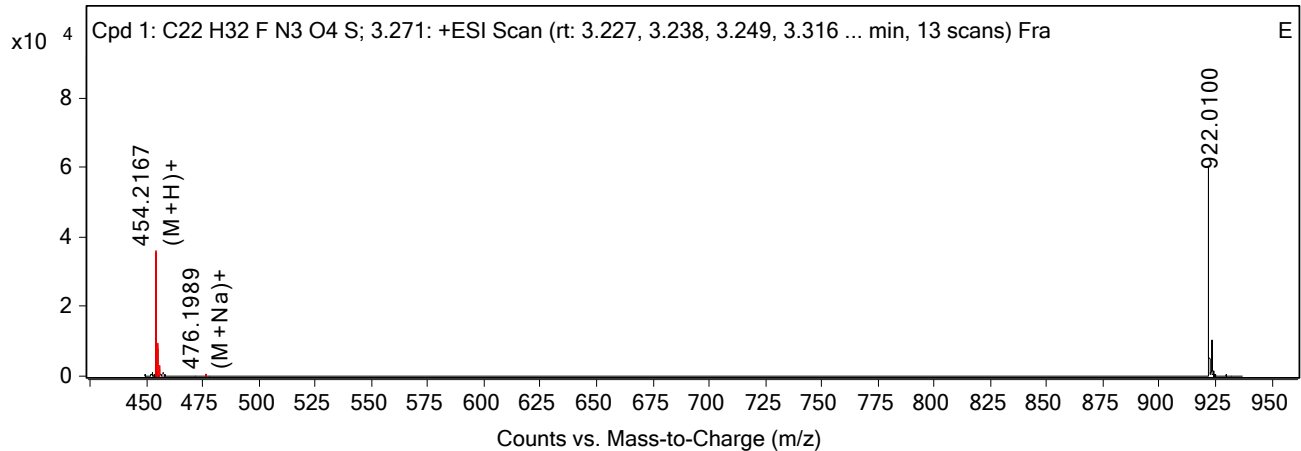

## MS Spectrum Peak List

| Obs. m/z | Charge | Abund    | Ion/Isotope | Tgt Mass Error (ppm) |
|----------|--------|----------|-------------|----------------------|
| 454.2167 | 1      | 36111.81 | (M+H)+      | 0.68                 |
| 455.2196 | 1      | 8070.88  | (M+H)+      | 0.96                 |
| 456.2171 | 1      | 2248.47  | (M+H)+      | 0.96                 |
| 476.1989 | 1      | 533.9    | (M+Na)+     | 0.17                 |
| 477.2039 | 1      | 145.14   | (M+Na)+     | -3.89                |
| 924.4786 | 1      | 226.52   | (2M+NH4)+   | -27.37               |
| 925.4775 | 1      | 154.61   | (2M+NH4)+   | -22.91               |
| 929.4093 | 1      | 332.05   | (2M+Na)+    | -0.63                |
| 930.4129 | 1      | 209.89   | (2M+Na)+    | -1.18                |
| 931.4089 | 1      | 113.38   | (2M+Na)+    | 2.08                 |

--- End Of Report ---

# Target Compound Screening Report

|                                 |                                        |                               |                                                     |
|---------------------------------|----------------------------------------|-------------------------------|-----------------------------------------------------|
| <b>Data File</b>                | 9-2.d                                  | <b>Sample Name</b>            | H2981848                                            |
| <b>Sample Type</b>              | Sample                                 | <b>Position</b>               | P1-A9                                               |
| <b>Instrument Name</b>          | Instrument 1                           | <b>User Name</b>              | Denis V.Bylina                                      |
| <b>Acq Method</b>               | Fast_Gradient_HRMS_pos_Lock_08272019.m | <b>Acquired Time</b>          | 9/24/2021 10:54:33 AM (UTC+03:00)                   |
| <b>IRM Calibration Status</b>   | Success                                | <b>DA Method</b>              | 1.m                                                 |
| <b>Comment</b>                  |                                        |                               |                                                     |
| <b>Sample Group</b>             |                                        | <b>Info.</b>                  | Agilent 6224 TOF LC/MS                              |
| <b>MFC</b>                      | C21H31N3O5S2                           | <b>Stream Name</b>            | LC 1                                                |
| <b>Acquisition Time (Local)</b> | 9/24/2021 10:54:33 AM (UTC+03:00)      | <b>Acquisition SW Version</b> | 6200 series TOF/6500 series Q-TOF B.08.00 (B8058.0) |
| <b>TOF Driver Version</b>       | 8.00.00                                | <b>TOF Firmware Version</b>   | 8.643                                               |
| <b>Tune Mass Range Max.</b>     | 1700                                   |                               |                                                     |

## Compound Table

| Label                          | Tgt Score | Mass Error (ppm) | Tgt Formula      | Obs. RT | Ref. Mass | Obs. Mass |
|--------------------------------|-----------|------------------|------------------|---------|-----------|-----------|
| Cpd 1: C21 H31 N3 O5 S2; 3.245 | 94.61     | -1.93            | C21 H31 N3 O5 S2 | 3.245   | 469.1705  | 469.1696  |

| Obs. m/z | Obs. RT | Obs. Mass | Tgt Formula      | Tgt Mass | Tgt Mass Error (ppm) | RT Diff.        | Find Cpds Algorithm |
|----------|---------|-----------|------------------|----------|----------------------|-----------------|---------------------|
| 470.177  | 3.245   | 469.1696  | C21 H31 N3 O5 S2 | 469.1705 | -1.93                | Find By Formula |                     |

## Compound Chromatograms

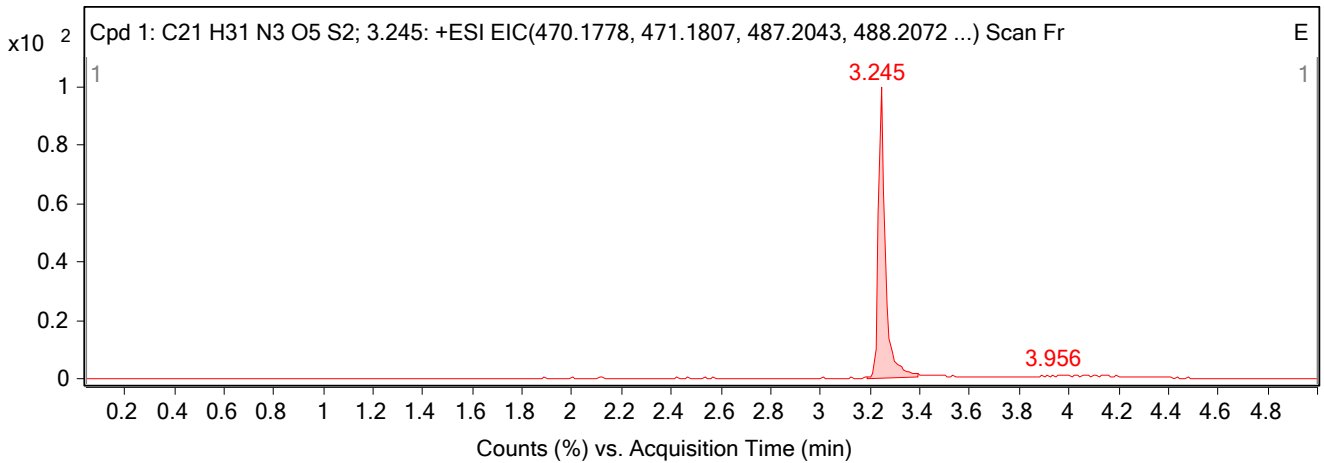

MS Zoomed Spectrum

# Target Compound Screening Report

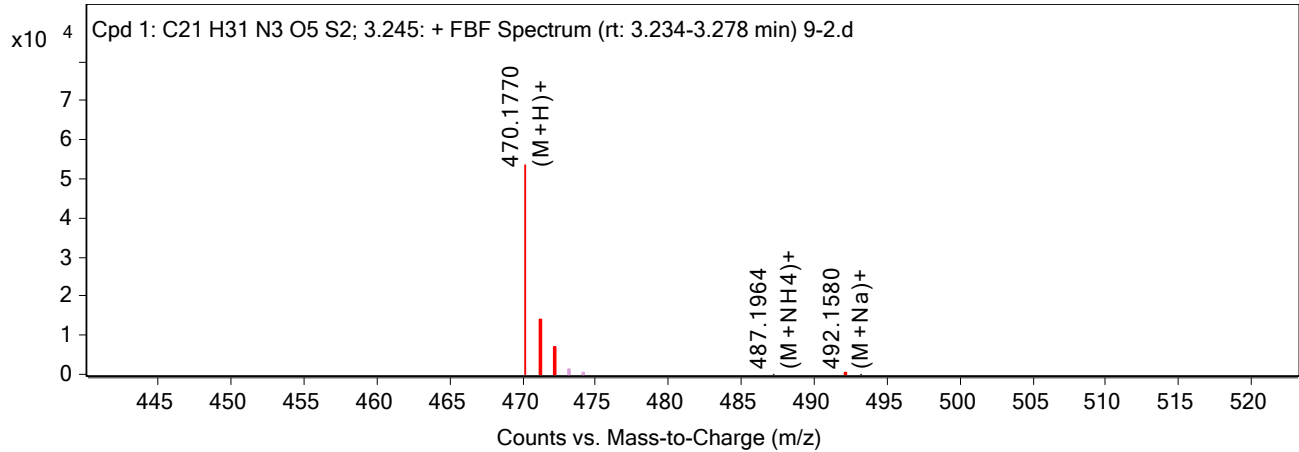

## MS Spectrum Peak List

| Obs. m/z | Charge | Abund    | Ion/Isotope |
|----------|--------|----------|-------------|
| 470.177  | 1      | 53450.74 | (M+H)+      |
| 471.1796 | 1      | 11702.55 | (M+H)+      |
| 472.1754 | 1      | 5371.45  | (M+H)+      |
| 487.1964 | 1      | 63.23    | (M+NH4)+    |
| 492.158  | 1      | 360.29   | (M+Na)+     |
| 493.1669 | 1      | 126.41   | (M+Na)+     |

## MS Zoomed Spectrum

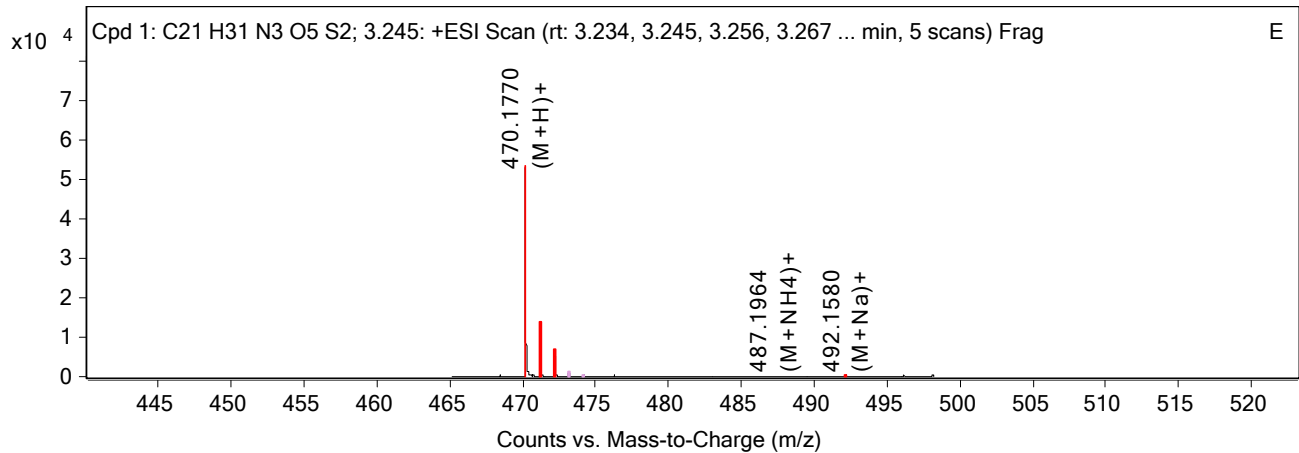

## MS Spectrum Peak List

| Obs. m/z | Charge | Abund    | Ion/Isotope | Tgt Mass Error (ppm) |
|----------|--------|----------|-------------|----------------------|
| 470.177  | 1      | 53450.74 | (M+H)+      | 1.74                 |
| 471.1796 | 1      | 11702.55 | (M+H)+      | 2.33                 |
| 472.1754 | 1      | 5371.45  | (M+H)+      | 2.77                 |
| 487.1964 | 1      | 63.23    | (M+NH4)+    | 16.26                |
| 492.158  | 1      | 360.29   | (M+Na)+     | 3.51                 |
| 493.1669 | 1      | 126.41   | (M+Na)+     | -8.6                 |

--- End Of Report ---

# Target Compound Screening Report

|                                 |                                        |                               |                                                     |
|---------------------------------|----------------------------------------|-------------------------------|-----------------------------------------------------|
| <b>Data File</b>                | 3d.d                                   | <b>Sample Name</b>            | H3472157                                            |
| <b>Sample Type</b>              | Sample                                 | <b>Position</b>               | P1-C3                                               |
| <b>Instrument Name</b>          | Instrument 1                           | <b>User Name</b>              | Denis V.Bylina                                      |
| <b>Acq Method</b>               | Fast_Gradient_HRMS_pos_Lock_08272019.m | <b>Acquired Time</b>          | 10/7/2021 9:24:37 AM (UTC+03:00)                    |
| <b>IRM Calibration Status</b>   | Success                                | <b>DA Method</b>              | 1.m                                                 |
| <b>Comment</b>                  |                                        |                               |                                                     |
| <b>Sample Group</b>             |                                        | <b>Info.</b>                  | Agilent 6224 TOF LC/MS                              |
| <b>MFC</b>                      | C21H31N3O5S2                           | <b>Stream Name</b>            | LC 1                                                |
| <b>Acquisition Time (Local)</b> | 10/7/2021 9:24:37 AM (UTC+03:00)       | <b>Acquisition SW Version</b> | 6200 series TOF/6500 series Q-TOF B.08.00 (B8058.0) |
| <b>TOF Driver Version</b>       | 8.00.00                                | <b>TOF Firmware Version</b>   | 8.643                                               |
| <b>Tune Mass Range Max.</b>     | 1700                                   |                               |                                                     |

## Compound Table

| Label                          | Tgt Score | Mass Error (ppm) | Tgt Formula      | Obs. RT | Ref. Mass | Obs. Mass |
|--------------------------------|-----------|------------------|------------------|---------|-----------|-----------|
| Cpd 1: C21 H31 N3 O5 S2; 3.220 | 95.19     | -1.75            | C21 H31 N3 O5 S2 | 3.22    | 469.1705  | 469.1697  |

| Obs. m/z | Obs. RT | Obs. Mass | Tgt Formula      | Tgt Mass | Tgt Mass Error (ppm) | RT Diff.        | Find Cpds Algorithm |
|----------|---------|-----------|------------------|----------|----------------------|-----------------|---------------------|
| 470.1771 | 3.22    | 469.1697  | C21 H31 N3 O5 S2 | 469.1705 | -1.75                | Find By Formula |                     |

## Compound Chromatograms

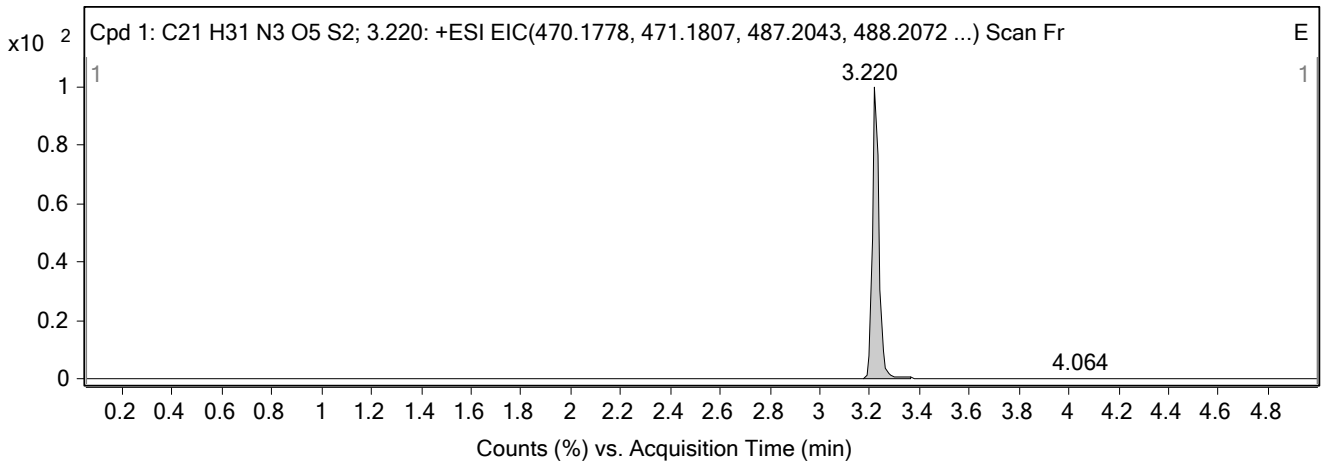

MS Zoomed Spectrum

# Target Compound Screening Report

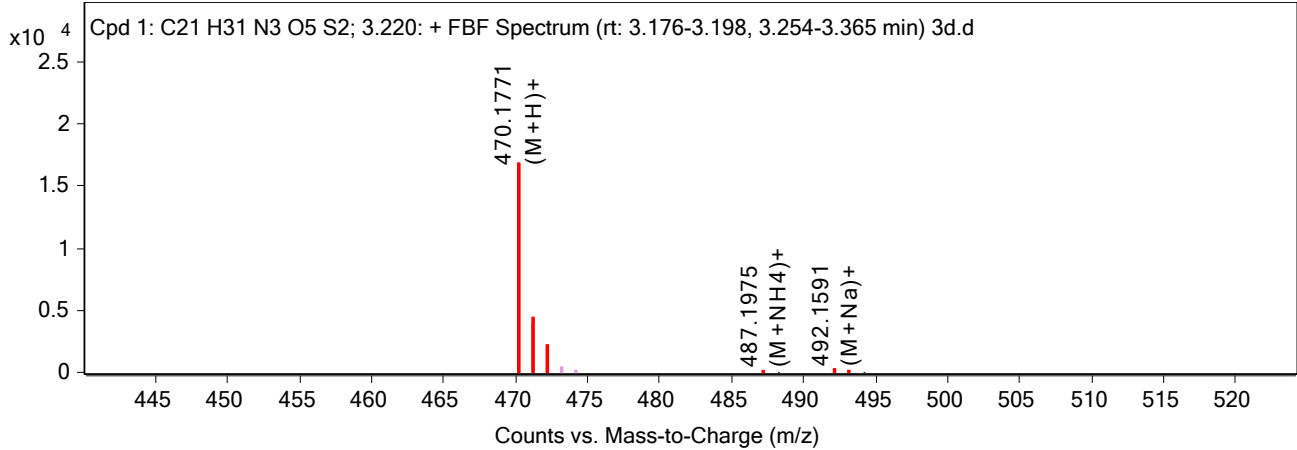

## MS Spectrum Peak List

| Obs. m/z | Charge | Abund    | Ion/Isotope |
|----------|--------|----------|-------------|
| 470.1771 | 1      | 16850.59 | (M+H)+      |
| 471.1795 | 1      | 3815.82  | (M+H)+      |
| 472.1765 | 1      | 1832.47  | (M+H)+      |
| 487.1975 | 1      | 114.57   | (M+NH4)+    |
| 488.191  | 1      | 75.1     | (M+NH4)+    |
| 492.1591 | 1      | 225.58   | (M+Na)+     |
| 493.1634 | 1      | 85       | (M+Na)+     |
| 494.1609 | 1      | 68.33    | (M+Na)+     |

## MS Zoomed Spectrum

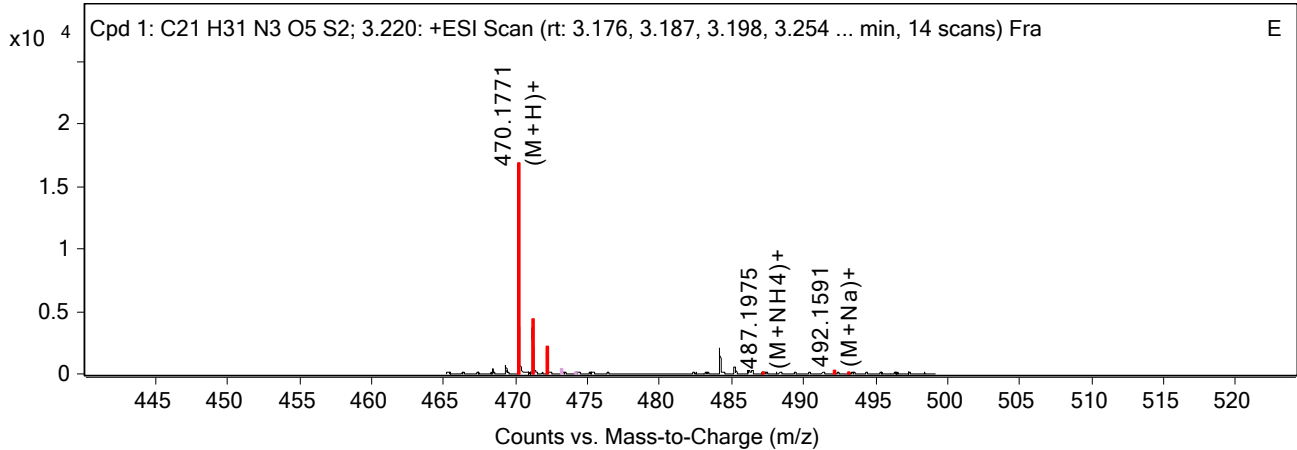

## MS Spectrum Peak List

| Obs. m/z | Charge | Abund    | Ion/Isotope | Tgt Mass Error (ppm) |
|----------|--------|----------|-------------|----------------------|
| 470.1771 | 1      | 16850.59 | (M+H)+      | 1.55                 |
| 471.1795 | 1      | 3815.82  | (M+H)+      | 2.41                 |
| 472.1765 | 1      | 1832.47  | (M+H)+      | 0.49                 |
| 487.1975 | 1      | 114.57   | (M+NH4)+    | 14.06                |
| 488.191  | 1      | 75.1     | (M+NH4)+    | 33.09                |
| 492.1591 | 1      | 225.58   | (M+Na)+     | 1.19                 |
| 493.1634 | 1      | 85       | (M+Na)+     | -1.52                |
| 494.1609 | 1      | 68.33    | (M+Na)+     | -4.51                |

--- End Of Report ---



# Target Compound Screening Report

|                                 |                                        |                               |                                                     |
|---------------------------------|----------------------------------------|-------------------------------|-----------------------------------------------------|
| <b>Data File</b>                | 28.d                                   | <b>Sample Name</b>            | H2977006                                            |
| <b>Sample Type</b>              | Sample                                 | <b>Position</b>               | P1-D1                                               |
| <b>Instrument Name</b>          | Instrument 1                           | <b>User Name</b>              | Denis V.Bylina                                      |
| <b>Acq Method</b>               | Fast_Gradient_HRMS_pos_Lock_08272019.m | <b>Acquired Time</b>          | 9/22/2021 4:17:56 PM (UTC+03:00)                    |
| <b>IRM Calibration Status</b>   | Success                                | <b>DA Method</b>              | 1.m                                                 |
| <b>Comment</b>                  |                                        |                               |                                                     |
| <b>Sample Group</b>             |                                        | <b>Info.</b>                  | Agilent 6224 TOF LC/MS                              |
| <b>MFC</b>                      | C24H27N5O2                             | <b>Stream Name</b>            | LC 1                                                |
| <b>Acquisition Time (Local)</b> | 9/22/2021 4:17:56 PM (UTC+03:00)       | <b>Acquisition SW Version</b> | 6200 series TOF/6500 series Q-TOF B.08.00 (B8058.0) |
| <b>TOF Driver Version</b>       | 8.00.00                                | <b>TOF Firmware Version</b>   | 8.643                                               |
| <b>Tune Mass Range Max.</b>     | 1700                                   |                               |                                                     |

### Compound Table

| Label                       | Tgt Score | Mass Error (ppm) | Tgt Formula   | Obs. RT | Ref. Mass | Obs. Mass |
|-----------------------------|-----------|------------------|---------------|---------|-----------|-----------|
| Cpd 1: C24 H27 N5 O2; 3.218 | 95.35     | -0.62            | C24 H27 N5 O2 | 3.218   | 417.2165  | 417.2162  |

| Obs. m/z | Obs. RT | Obs. Mass | Tgt Formula   | Tgt Mass | Tgt Mass Error (ppm) | RT Diff.        | Find Cpds Algorithm |
|----------|---------|-----------|---------------|----------|----------------------|-----------------|---------------------|
| 418.2234 | 3.218   | 417.2162  | C24 H27 N5 O2 | 417.2165 | -0.62                | Find By Formula |                     |

### Compound Chromatograms

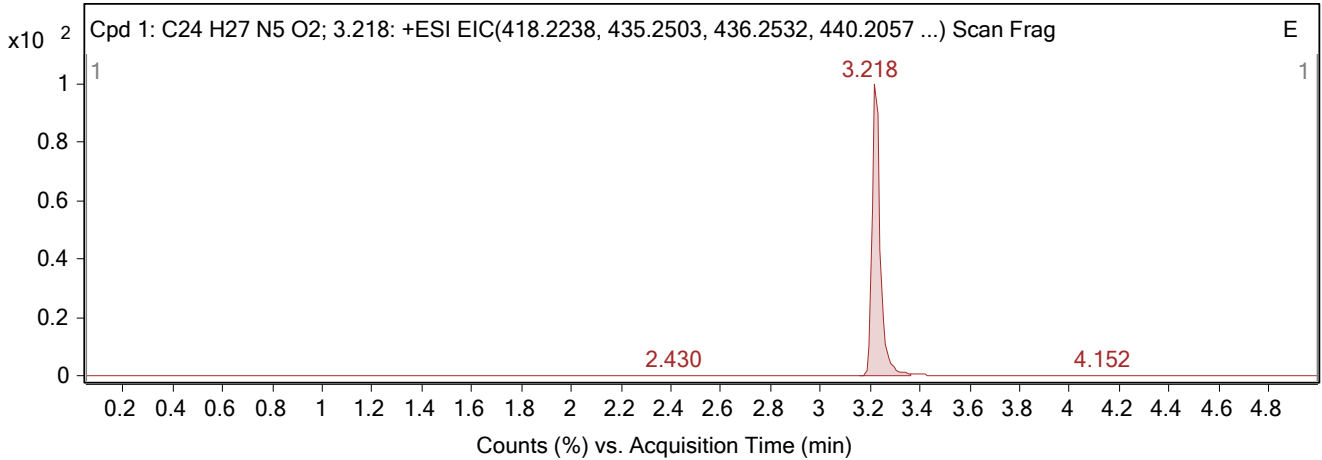

MS Zoomed Spectrum

# Target Compound Screening Report

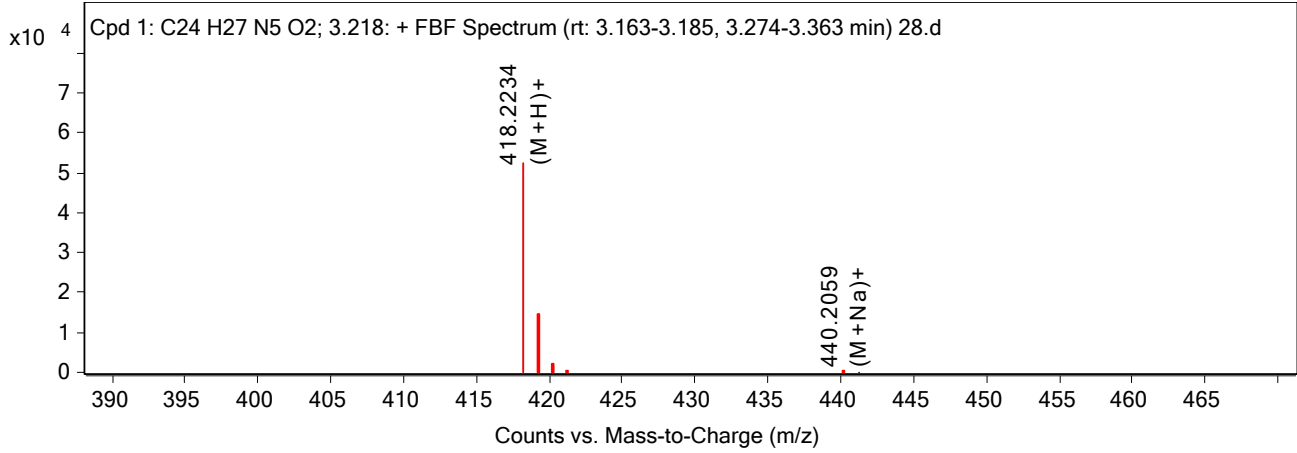

## MS Spectrum Peak List

| Obs. m/z | Charge | Abund    | Ion/Isotope |
|----------|--------|----------|-------------|
| 418.2234 | 1      | 52399.58 | (M+H)+      |
| 419.2266 | 1      | 12055.75 | (M+H)+      |
| 420.2296 | 1      | 1757.9   | (M+H)+      |
| 421.235  | 1      | 256.69   | (M+H)+      |
| 440.2059 | 1      | 345.36   | (M+Na)+     |
| 441.2142 | 1      | 118.75   | (M+Na)+     |

## MS Zoomed Spectrum

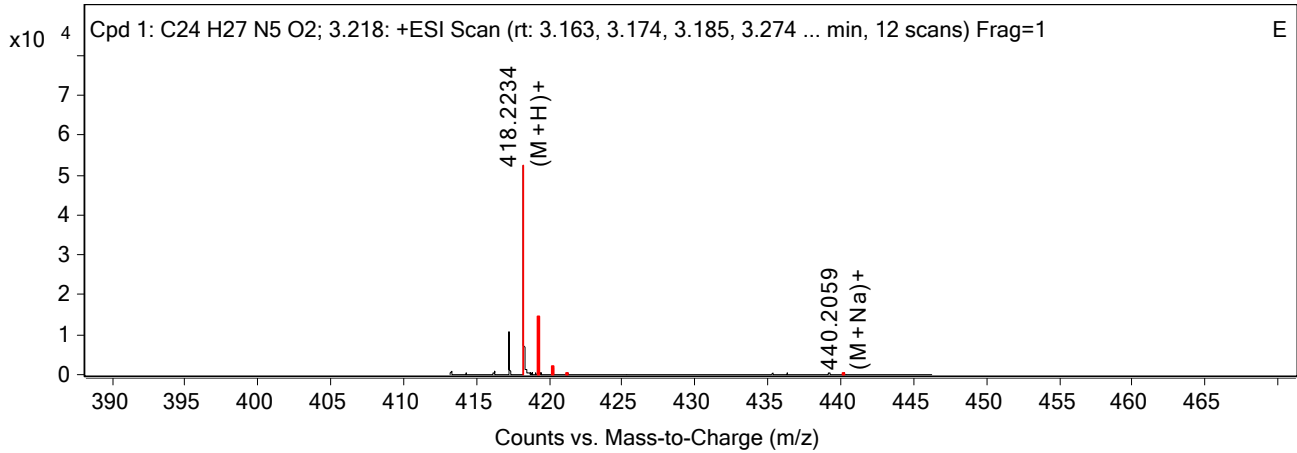

## MS Spectrum Peak List

| Obs. m/z | Charge | Abund    | Ion/Isotope | Tgt Mass Error (ppm) |
|----------|--------|----------|-------------|----------------------|
| 418.2234 | 1      | 52399.58 | (M+H)+      | 0.79                 |
| 418.2234 |        | 52399.58 |             |                      |
| 419.2266 | 1      | 12055.75 | (M+H)+      | 0.32                 |
| 420.2296 | 1      | 1757.9   | (M+H)+      | -0.14                |
| 421.235  | 1      | 256.69   | (M+H)+      | -6.54                |
| 440.2059 | 1      | 345.36   | (M+Na)+     | -0.49                |
| 441.2142 | 1      | 118.75   | (M+Na)+     | -12.52               |

--- End Of Report ---

# Target Compound Screening Report

|                                 |                                        |                               |                                                     |
|---------------------------------|----------------------------------------|-------------------------------|-----------------------------------------------------|
| <b>Data File</b>                | 10.d                                   | <b>Sample Name</b>            | H2980296                                            |
| <b>Sample Type</b>              | Sample                                 | <b>Position</b>               | P1-B1                                               |
| <b>Instrument Name</b>          | Instrument 1                           | <b>User Name</b>              | Denis V.Bylina                                      |
| <b>Acq Method</b>               | Fast_Gradient_HRMS_pos_Lock_08272019.m | <b>Acquired Time</b>          | 9/23/2021 7:43:52 PM (UTC+03:00)                    |
| <b>IRM Calibration Status</b>   | Success                                | <b>DA Method</b>              | 1.m                                                 |
| <b>Comment</b>                  |                                        |                               |                                                     |
| <b>Sample Group</b>             |                                        | <b>Info.</b>                  | Agilent 6224 TOF LC/MS                              |
| <b>MFC</b>                      | C25H30N6O2                             | <b>Stream Name</b>            | LC 1                                                |
| <b>Acquisition Time (Local)</b> | 9/23/2021 7:43:52 PM (UTC+03:00)       | <b>Acquisition SW Version</b> | 6200 series TOF/6500 series Q-TOF B.08.00 (B8058.0) |
| <b>TOF Driver Version</b>       | 8.00.00                                | <b>TOF Firmware Version</b>   | 8.643                                               |
| <b>Tune Mass Range Max.</b>     | 1700                                   |                               |                                                     |

## Compound Table

| Label                       | Tgt Score | Mass Error (ppm) | Tgt Formula   | Obs. RT | Ref. Mass | Obs. Mass |
|-----------------------------|-----------|------------------|---------------|---------|-----------|-----------|
| Cpd 1: C25 H30 N6 O2; 2.421 | 94.39     | -1.65            | C25 H30 N6 O2 | 2.421   | 446.243   | 446.2423  |

| Obs. m/z | Obs. RT | Obs. Mass | Tgt Formula   | Tgt Mass | Tgt Mass Error (ppm) | RT Diff.        | Find Cpd Algorithm |
|----------|---------|-----------|---------------|----------|----------------------|-----------------|--------------------|
| 447.2496 | 2.421   | 446.2423  | C25 H30 N6 O2 | 446.243  | -1.65                | Find By Formula |                    |

## Compound Chromatograms

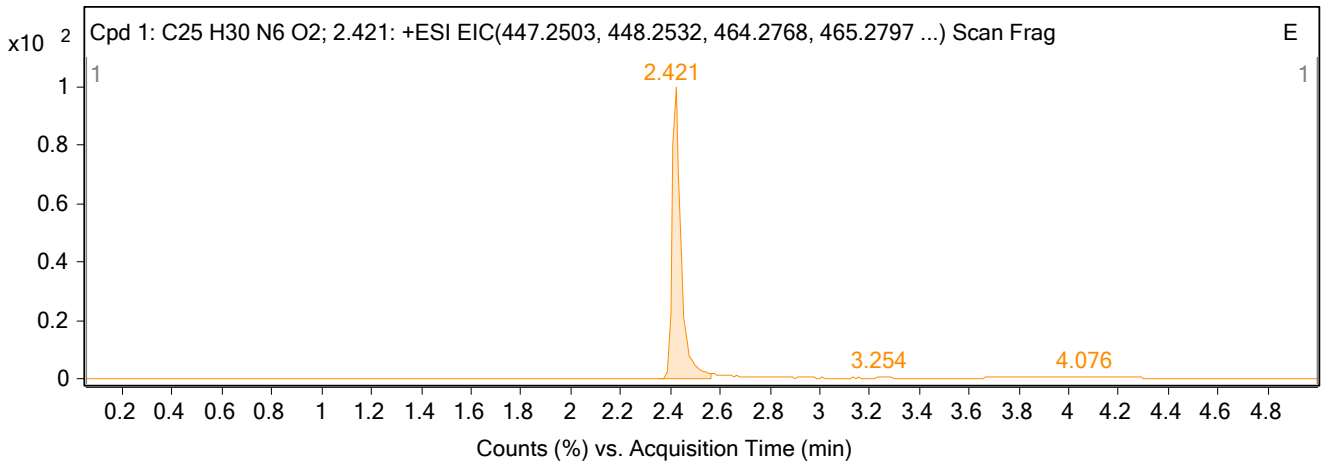

MS Zoomed Spectrum

# Target Compound Screening Report

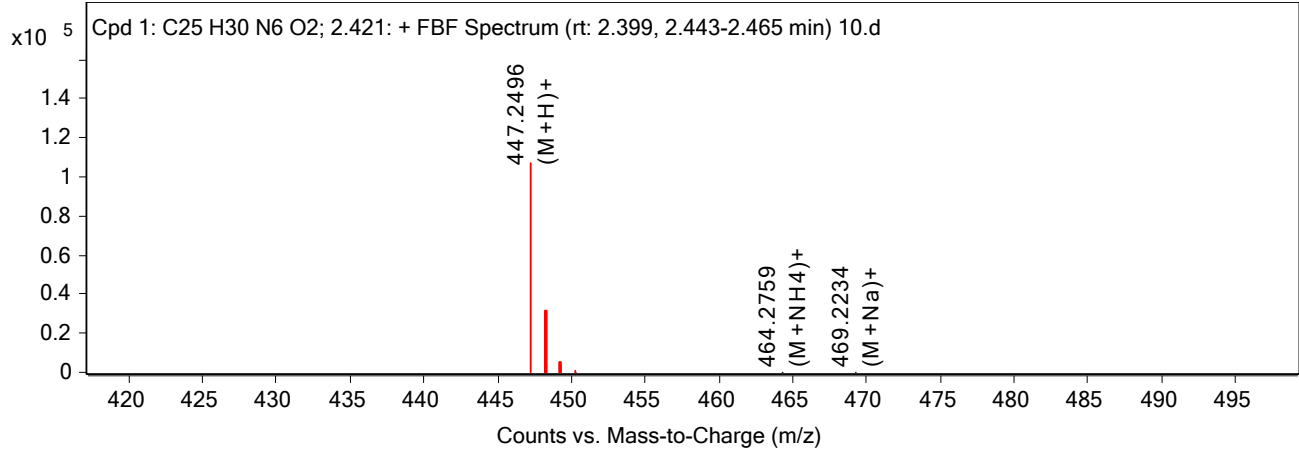

## MS Spectrum Peak List

| Obs. m/z | Charge | Abund    | Ion/Isotope           |
|----------|--------|----------|-----------------------|
| 447.2496 | 1      | 106848.6 | (M+H)+                |
| 448.2525 | 1      | 25685.4  | (M+H)+                |
| 449.2547 | 1      | 3613.69  | (M+H)+                |
| 450.2597 | 1      | 449.02   | (M+H)+                |
| 464.2759 | 1      | 55.67    | (M+NH <sub>4</sub> )+ |
| 469.2234 | 1      | 97.72    | (M+Na)+               |

## MS Zoomed Spectrum

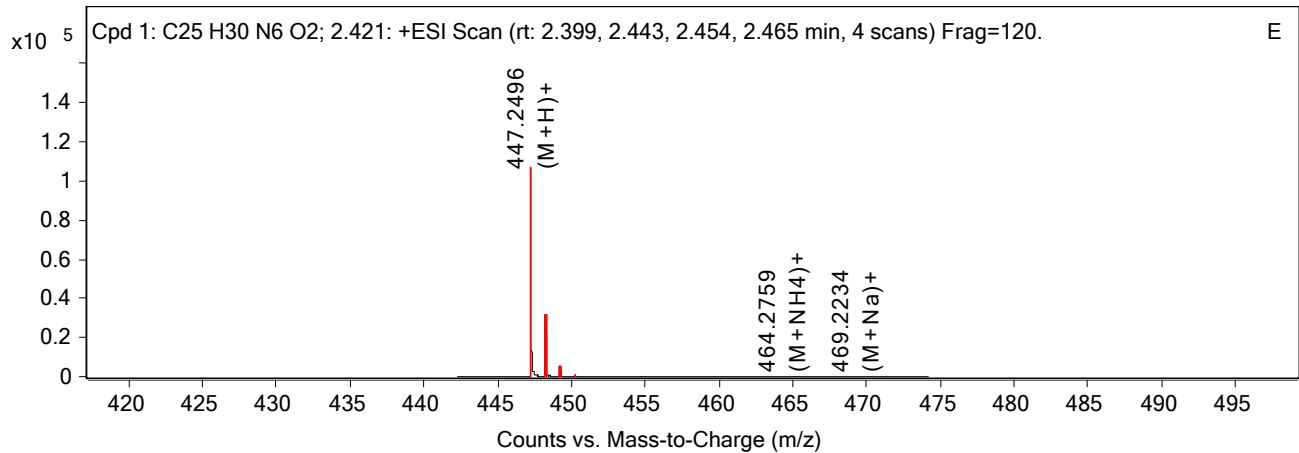

## MS Spectrum Peak List

| Obs. m/z | Charge | Abund    | Ion/Isotope           | Tgt Mass Error (ppm) |
|----------|--------|----------|-----------------------|----------------------|
| 447.2496 | 1      | 106848.6 | (M+H)+                | 1.59                 |
| 447.2496 |        | 106848.6 |                       |                      |
| 448.2525 | 1      | 25685.4  | (M+H)+                | 1.68                 |
| 449.2547 | 1      | 3613.69  | (M+H)+                | 2.93                 |
| 450.2597 | 1      | 449.02   | (M+H)+                | -2.32                |
| 464.2759 | 1      | 55.67    | (M+NH <sub>4</sub> )+ | 1.95                 |
| 469.2234 | 1      | 97.72    | (M+Na)+               | 18.79                |

--- End Of Report ---

# Target Compound Screening Report

|                                 |                                        |                               |                                                     |
|---------------------------------|----------------------------------------|-------------------------------|-----------------------------------------------------|
| <b>Data File</b>                | 2-3.d                                  | <b>Sample Name</b>            | H2980680                                            |
| <b>Sample Type</b>              | Sample                                 | <b>Position</b>               | P1-A2                                               |
| <b>Instrument Name</b>          | Instrument 1                           | <b>User Name</b>              | Denis V.Bylina                                      |
| <b>Acq Method</b>               | Fast_Gradient_HRMS_pos_Lock_08272019.m | <b>Acquired Time</b>          | 9/24/2021 10:12:53 AM (UTC+03:00)                   |
| <b>IRM Calibration Status</b>   | Success                                | <b>DA Method</b>              | 1.m                                                 |
| <b>Comment</b>                  |                                        |                               |                                                     |
| <b>Sample Group</b>             |                                        | <b>Info.</b>                  | Agilent 6224 TOF LC/MS                              |
| <b>MFC</b>                      | C25H37N3O4S                            | <b>Stream Name</b>            | LC 1                                                |
| <b>Acquisition Time (Local)</b> | 9/24/2021 10:12:53 AM (UTC+03:00)      | <b>Acquisition SW Version</b> | 6200 series TOF/6500 series Q-TOF B.08.00 (B8058.0) |
| <b>TOF Driver Version</b>       | 8.00.00                                | <b>TOF Firmware Version</b>   | 8.643                                               |
| <b>Tune Mass Range Max.</b>     | 1700                                   |                               |                                                     |

## Compound Table

| Label                         | Tgt Score | Mass Error (ppm) | Tgt Formula     | Obs. RT | Ref. Mass | Obs. Mass |
|-------------------------------|-----------|------------------|-----------------|---------|-----------|-----------|
| Cpd 1: C25 H37 N3 O4 S; 3.218 | 94.16     | -0.27            | C25 H37 N3 O4 S | 3.218   | 475.2505  | 475.2504  |

| Obs. m/z | Obs. RT | Obs. Mass | Tgt Formula     | Tgt Mass | Tgt Mass Error (ppm) | RT Diff.        | Find Cpd Algorithm |
|----------|---------|-----------|-----------------|----------|----------------------|-----------------|--------------------|
| 476.2577 | 3.218   | 475.2504  | C25 H37 N3 O4 S | 475.2505 | -0.27                | Find By Formula |                    |

## Compound Chromatograms

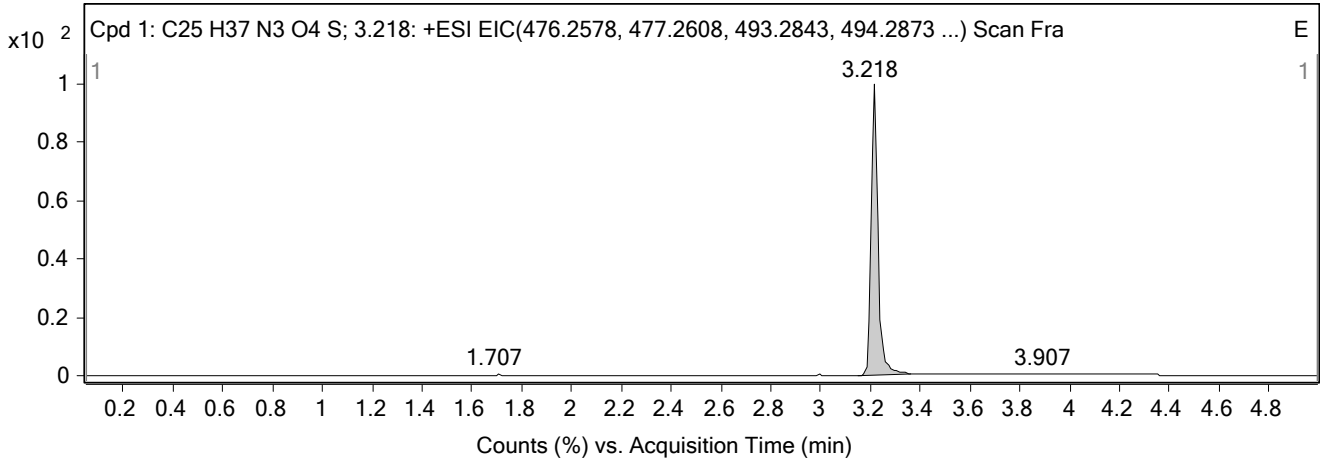

MS Zoomed Spectrum

# Target Compound Screening Report

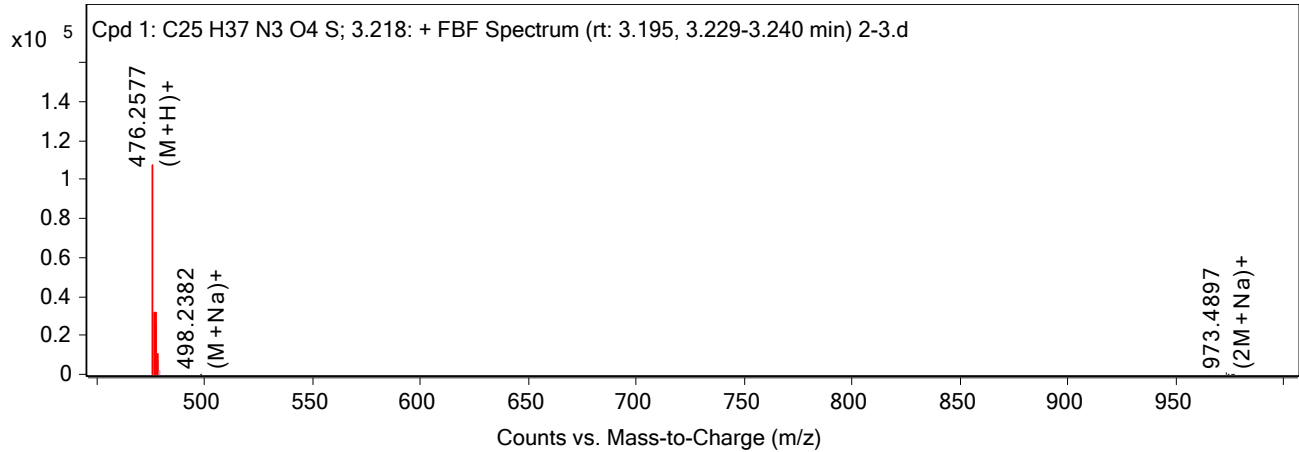

## MS Spectrum Peak List

| Obs. m/z | Charge | Abund     | Ion/Isotope |
|----------|--------|-----------|-------------|
| 476.2577 | 1      | 107156.63 | (M+H)+      |
| 477.2607 | 1      | 25236.92  | (M+H)+      |
| 478.2574 | 1      | 7331.12   | (M+H)+      |
| 498.2382 | 1      | 421       | (M+Na)+     |
| 973.4897 | 1      | 593.72    | (2M+Na)+    |
| 974.4931 | 1      | 361.82    | (2M+Na)+    |
| 975.4877 | 1      | 216.34    | (2M+Na)+    |
| 976.4883 | 1      | 78.12     | (2M+Na)+    |

## MS Zoomed Spectrum

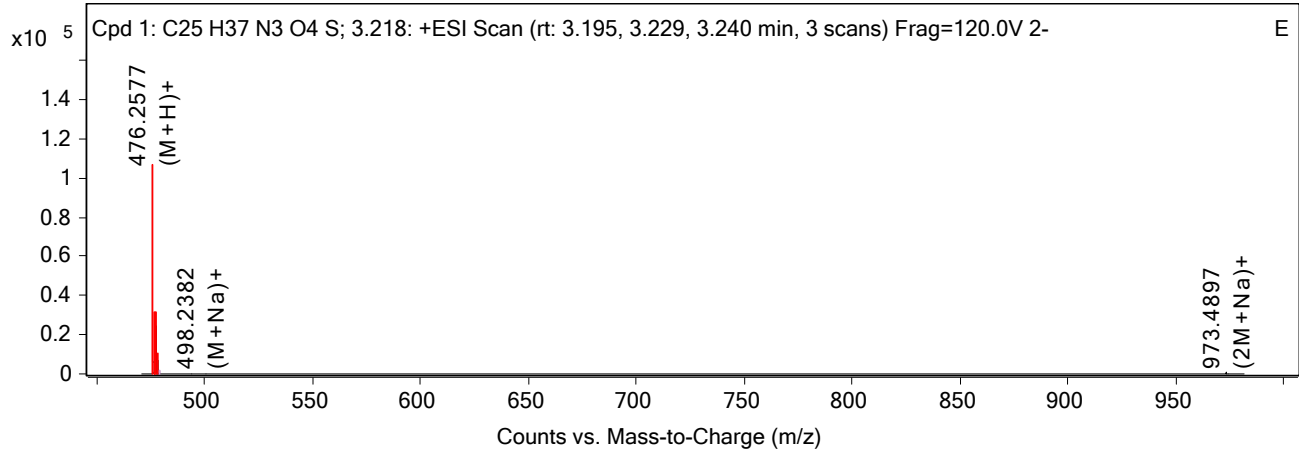

## MS Spectrum Peak List

| Obs. m/z | Charge | Abund     | Ion/Isotope | Tgt Mass Error (ppm) |
|----------|--------|-----------|-------------|----------------------|
| 476.2577 | 1      | 107156.63 | (M+H)+      | 0.05                 |
| 476.2577 | 1      | 107156.63 | (M+H)+      |                      |
| 477.2607 | 1      | 25236.92  | (M+H)+      | 0.2                  |
| 478.2574 | 1      | 7331.12   | (M+H)+      | 3.02                 |
| 498.2382 | 1      | 421       | (M+Na)+     | 3.03                 |
| 973.4897 | 1      | 593.72    | (2M+Na)+    | 0.49                 |
| 974.4931 | 1      | 361.82    | (2M+Na)+    | 0.12                 |
| 975.4877 | 1      | 216.34    | (2M+Na)+    | 5.29                 |
| 976.4883 | 1      | 78.12     | (2M+Na)+    | 5.34                 |

--- End Of Report ---

# Target Compound Screening Report

|                                 |                                        |                               |                                                     |
|---------------------------------|----------------------------------------|-------------------------------|-----------------------------------------------------|
| <b>Data File</b>                | 7-2.d                                  | <b>Sample Name</b>            | H2980682                                            |
| <b>Sample Type</b>              | Sample                                 | <b>Position</b>               | P1-A7                                               |
| <b>Instrument Name</b>          | Instrument 1                           | <b>User Name</b>              | Denis V.Bylina                                      |
| <b>Acq Method</b>               | Fast_Gradient_HRMS_pos_Lock_08272019.m | <b>Acquired Time</b>          | 9/24/2021 10:43:32 AM (UTC+03:00)                   |
| <b>IRM Calibration Status</b>   | Success                                | <b>DA Method</b>              | 1.m                                                 |
| <b>Comment</b>                  |                                        |                               |                                                     |
| <b>Sample Group</b>             |                                        | <b>Info.</b>                  | Agilent 6224 TOF LC/MS                              |
| <b>MFC</b>                      | C22H33N3O6S2                           | <b>Stream Name</b>            | LC 1                                                |
| <b>Acquisition Time (Local)</b> | 9/24/2021 10:43:32 AM (UTC+03:00)      | <b>Acquisition SW Version</b> | 6200 series TOF/6500 series Q-TOF B.08.00 (B8058.0) |
| <b>TOF Driver Version</b>       | 8.00.00                                | <b>TOF Firmware Version</b>   | 8.643                                               |
| <b>Tune Mass Range Max.</b>     | 1700                                   |                               |                                                     |

## Compound Table

| Label                          | Tgt Score | Mass Error (ppm) | Tgt Formula      | Obs. RT | Ref. Mass | Obs. Mass |
|--------------------------------|-----------|------------------|------------------|---------|-----------|-----------|
| Cpd 1: C22 H33 N3 O6 S2; 2.805 | 94.93     | -2.01            | C22 H33 N3 O6 S2 | 2.805   | 499.1811  | 499.1801  |

| Obs. m/z | Obs. RT | Obs. Mass | Tgt Formula      | Tgt Mass | Tgt Mass Error (ppm) | RT Diff.        | Find Cpds Algorithm |
|----------|---------|-----------|------------------|----------|----------------------|-----------------|---------------------|
| 500.1874 | 2.805   | 499.1801  | C22 H33 N3 O6 S2 | 499.1811 | -2.01                | Find By Formula |                     |

## Compound Chromatograms

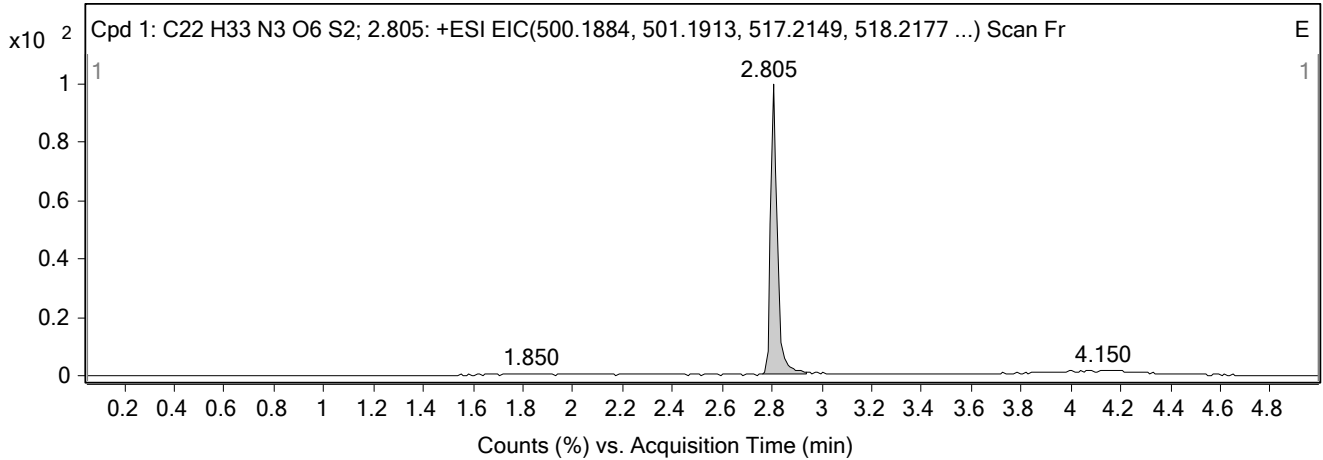

MS Zoomed Spectrum

# Target Compound Screening Report

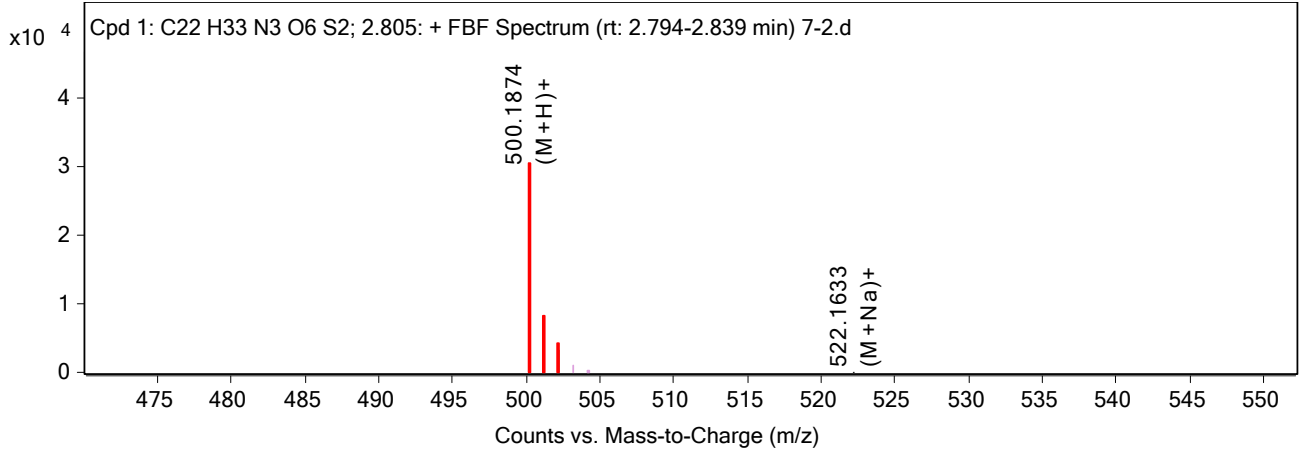

## MS Spectrum Peak List

| Obs. m/z | Charge | Abund    | Ion/Isotope |
|----------|--------|----------|-------------|
| 500.1874 | 1      | 30444.02 | (M+H)+      |
| 501.1904 | 1      | 7132.11  | (M+H)+      |
| 502.1861 | 1      | 3246.71  | (M+H)+      |
| 522.1633 | 1      | 76.33    | (M+Na)+     |

## MS Zoomed Spectrum

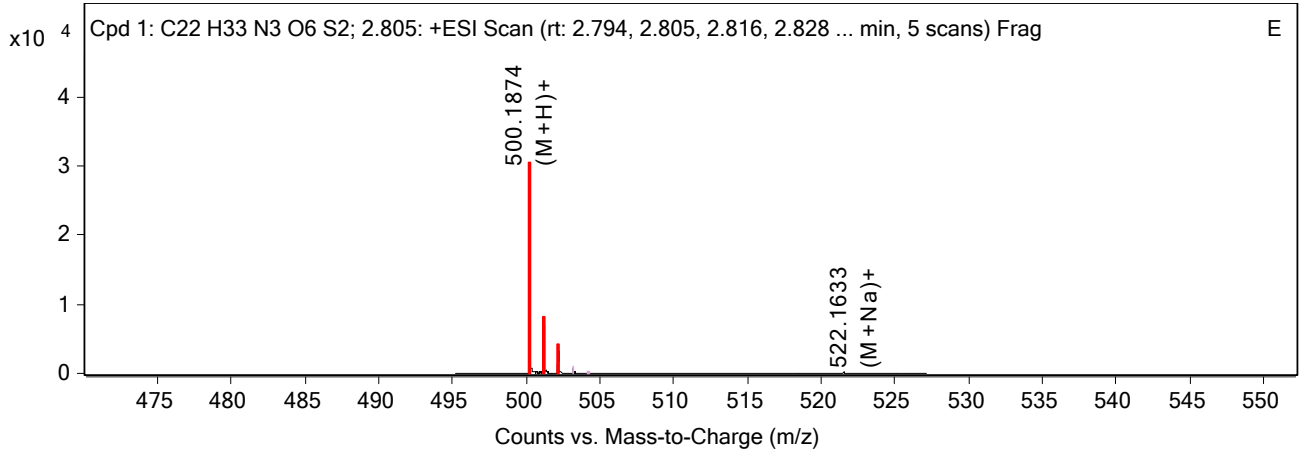

## MS Spectrum Peak List

| Obs. m/z | Charge | Abund    | Ion/Isotope | Tgt Mass Error (ppm) |
|----------|--------|----------|-------------|----------------------|
| 500.1874 | 1      | 30444.02 | (M+H)+      | 1.98                 |
| 501.1904 | 1      | 7132.11  | (M+H)+      | 1.64                 |
| 502.1861 | 1      | 3246.71  | (M+H)+      | 2.72                 |
| 522.1633 | 1      | 76.33    | (M+Na)+     | 13.33                |

--- End Of Report ---



# Target Compound Screening Report

|                                 |                                        |                               |                                                     |
|---------------------------------|----------------------------------------|-------------------------------|-----------------------------------------------------|
| <b>Data File</b>                | 41.d                                   | <b>Sample Name</b>            | H2975461                                            |
| <b>Sample Type</b>              | Sample                                 | <b>Position</b>               | P1-E5                                               |
| <b>Instrument Name</b>          | Instrument 1                           | <b>User Name</b>              | Denis V.Bylina                                      |
| <b>Acq Method</b>               | Fast_Gradient_HRMS_pos_Lock_08272019.m | <b>Acquired Time</b>          | 9/24/2021 1:56:49 PM (UTC+03:00)                    |
| <b>IRM Calibration Status</b>   | Success                                | <b>DA Method</b>              | 1.m                                                 |
| <b>Comment</b>                  |                                        |                               |                                                     |
| <b>Sample Group</b>             |                                        | <b>Info.</b>                  | Agilent 6224 TOF LC/MS                              |
| <b>MFC</b>                      | C23H35N3O5S2                           | <b>Stream Name</b>            | LC 1                                                |
| <b>Acquisition Time (Local)</b> | 9/24/2021 1:56:49 PM (UTC+03:00)       | <b>Acquisition SW Version</b> | 6200 series TOF/6500 series Q-TOF B.08.00 (B8058.0) |
| <b>TOF Driver Version</b>       | 8.00.00                                | <b>TOF Firmware Version</b>   | 8.643                                               |
| <b>Tune Mass Range Max.</b>     | 1700                                   |                               |                                                     |

## Compound Table

| Label                          | Tgt Score | Mass Error (ppm) | Tgt Formula      | Obs. RT | Ref. Mass | Obs. Mass |
|--------------------------------|-----------|------------------|------------------|---------|-----------|-----------|
| Cpd 1: C23 H35 N3 O5 S2; 2.999 | 93.55     | -1.69            | C23 H35 N3 O5 S2 | 2.999   | 497.2018  | 497.201   |

| Obs. m/z | Obs. RT | Obs. Mass | Tgt Formula      | Tgt Mass | Tgt Mass Error (ppm) | RT Diff.        | Find Cps Algorithm |
|----------|---------|-----------|------------------|----------|----------------------|-----------------|--------------------|
| 498.2083 | 2.999   | 497.201   | C23 H35 N3 O5 S2 | 497.2018 | -1.69                | Find By Formula |                    |

## Compound Chromatograms

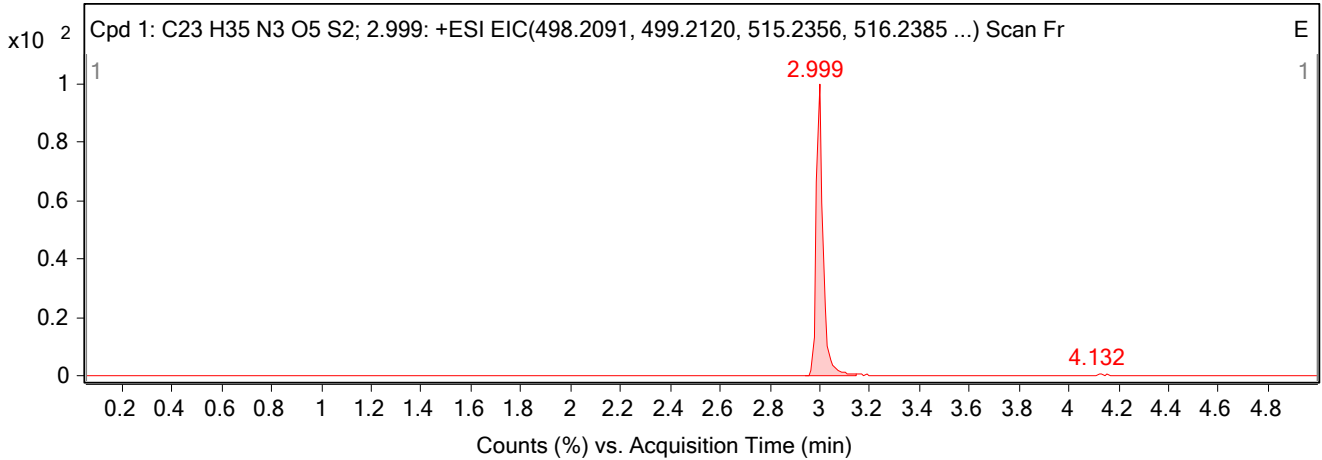

MS Zoomed Spectrum

# Target Compound Screening Report

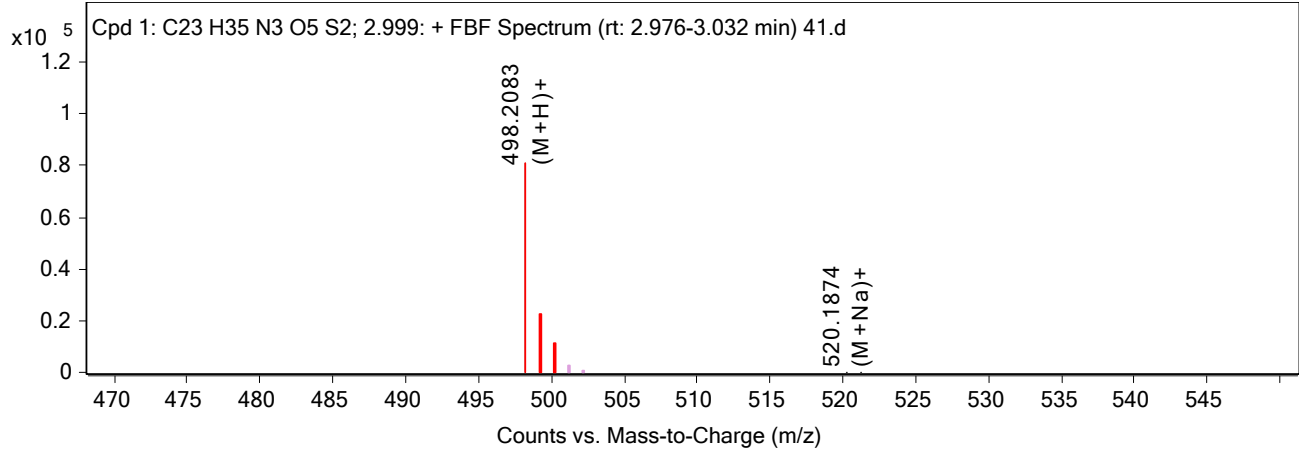

## MS Spectrum Peak List

| Obs. m/z | Charge | Abund    | Ion/Isotope |
|----------|--------|----------|-------------|
| 498.2083 | 1      | 80827.17 | (M+H)+      |
| 499.2113 | 1      | 18751.76 | (M+H)+      |
| 500.2069 | 1      | 8079.76  | (M+H)+      |
| 520.1874 | 1      | 135.68   | (M+Na)+     |
| 521.2053 | 1      | 51.07    | (M+Na)+     |

## MS Zoomed Spectrum

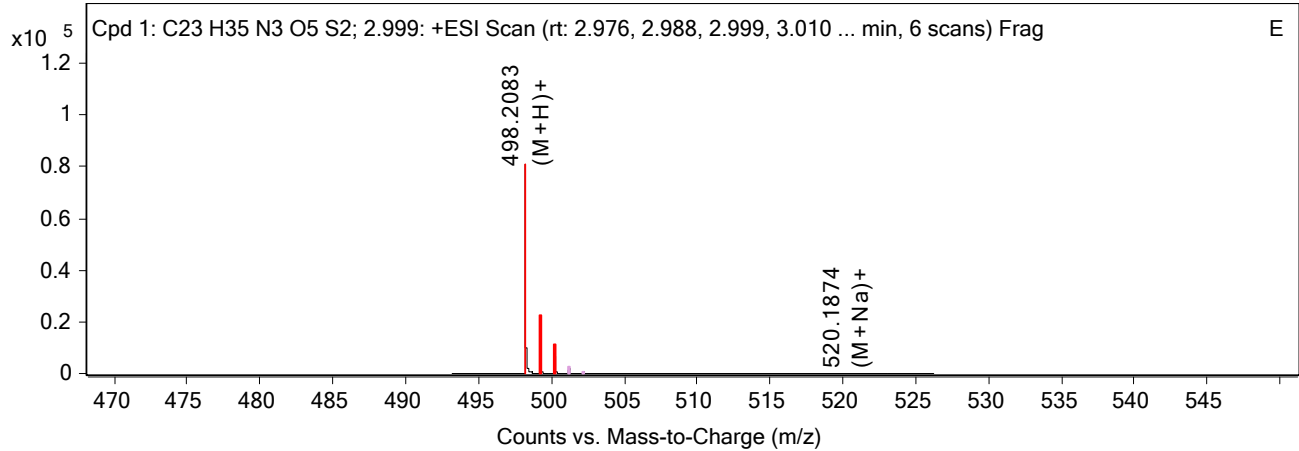

## MS Spectrum Peak List

| Obs. m/z | Charge | Abund    | Ion/Isotope | Tgt Mass Error (ppm) |
|----------|--------|----------|-------------|----------------------|
| 498.2083 | 1      | 80827.17 | (M+H)+      | 1.65                 |
| 499.2113 | 1      | 18751.76 | (M+H)+      | 1.37                 |
| 500.2069 | 1      | 8079.76  | (M+H)+      | 2.83                 |
| 520.1874 | 1      | 135.68   | (M+Na)+     | 7.02                 |
| 521.2053 | 1      | 51.07    | (M+Na)+     | -21.83               |

--- End Of Report ---

# Target Compound Screening Report

|                                 |                                        |                               |                                                     |
|---------------------------------|----------------------------------------|-------------------------------|-----------------------------------------------------|
| <b>Data File</b>                | 32.d                                   | <b>Sample Name</b>            | H2975746                                            |
| <b>Sample Type</b>              | Sample                                 | <b>Position</b>               | P1-D5                                               |
| <b>Instrument Name</b>          | Instrument 1                           | <b>User Name</b>              | Denis V.Bylina                                      |
| <b>Acq Method</b>               | Fast_Gradient_HRMS_pos_Lock_08272019.m | <b>Acquired Time</b>          | 9/22/2021 4:40:09 PM (UTC+03:00)                    |
| <b>IRM Calibration Status</b>   | Success                                | <b>DA Method</b>              | 1.m                                                 |
| <b>Comment</b>                  |                                        |                               |                                                     |
| <b>Sample Group</b>             |                                        | <b>Info.</b>                  | Agilent 6224 TOF LC/MS                              |
| <b>MFC</b>                      | C23H33N3O4S                            | <b>Stream Name</b>            | LC 1                                                |
| <b>Acquisition Time (Local)</b> | 9/22/2021 4:40:09 PM (UTC+03:00)       | <b>Acquisition SW Version</b> | 6200 series TOF/6500 series Q-TOF B.08.00 (B8058.0) |
| <b>TOF Driver Version</b>       | 8.00.00                                | <b>TOF Firmware Version</b>   | 8.643                                               |
| <b>Tune Mass Range Max.</b>     | 1700                                   |                               |                                                     |

## Compound Table

| Label                         | Tgt Score | Mass Error (ppm) | Tgt Formula     | Obs. RT | Ref. Mass | Obs. Mass |
|-------------------------------|-----------|------------------|-----------------|---------|-----------|-----------|
| Cpd 1: C23 H33 N3 O4 S; 3.194 | 95.71     | 0.05             | C23 H33 N3 O4 S | 3.194   | 447.2192  | 447.2192  |

| Obs. m/z | Obs. RT | Obs. Mass | Tgt Formula     | Tgt Mass | Tgt Mass Error (ppm) | RT Diff.        | Find Cps Algorithm |
|----------|---------|-----------|-----------------|----------|----------------------|-----------------|--------------------|
| 448.2265 | 3.194   | 447.2192  | C23 H33 N3 O4 S | 447.2192 | 0.05                 | Find By Formula |                    |

## Compound Chromatograms

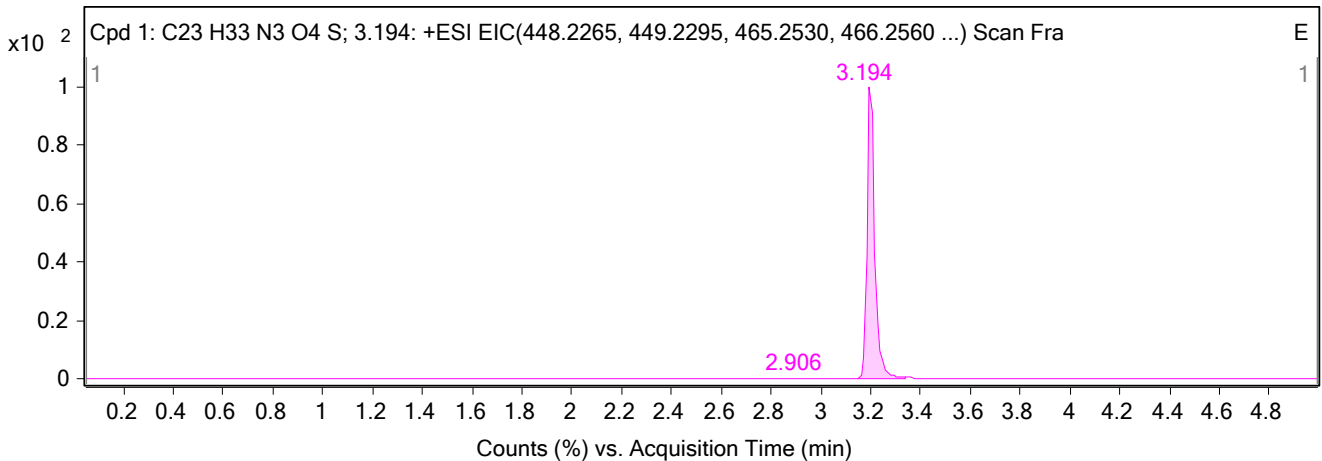

MS Zoomed Spectrum

# Target Compound Screening Report

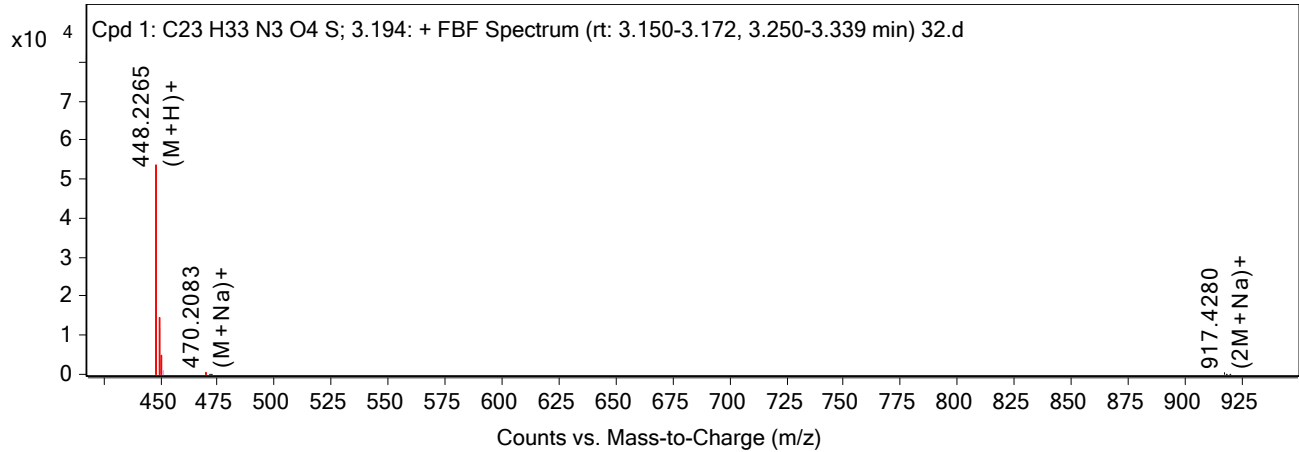

## MS Spectrum Peak List

| Obs. m/z | Charge | Abund    | Ion/Isotope |
|----------|--------|----------|-------------|
| 448.2265 | 1      | 53485.56 | (M+H)+      |
| 449.2297 | 1      | 12059.64 | (M+H)+      |
| 450.227  | 1      | 3421.13  | (M+H)+      |
| 470.2083 | 1      | 490.2    | (M+Na)+     |
| 471.2135 | 1      | 161.3    | (M+Na)+     |
| 472.2058 | 1      | 66.25    | (M+Na)+     |
| 917.428  | 1      | 326.45   | (2M+Na)+    |
| 918.4279 | 1      | 179.22   | (2M+Na)+    |
| 919.4261 | 1      | 97.73    | (2M+Na)+    |

## MS Zoomed Spectrum

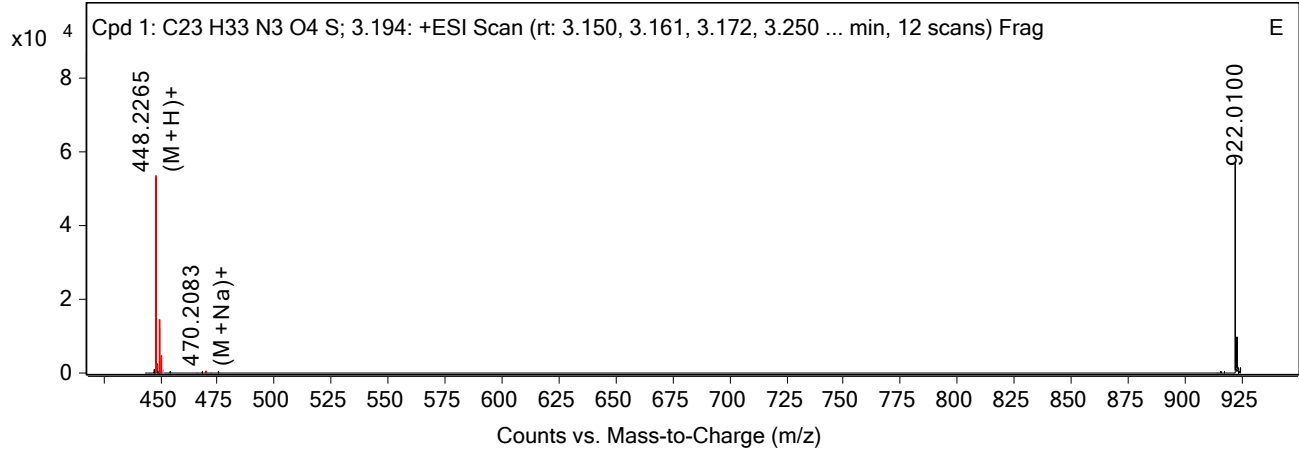

## MS Spectrum Peak List

| Obs. m/z | Charge | Abund    | Ion/Isotope | Tgt Mass Error (ppm) |
|----------|--------|----------|-------------|----------------------|
| 448.2265 | 1      | 53485.56 | (M+H)+      | -0.01                |
| 449.2297 | 1      | 12059.64 | (M+H)+      | -0.45                |
| 450.227  | 1      | 3421.13  | (M+H)+      | 0.3                  |
| 470.2083 | 1      | 490.2    | (M+Na)+     | 0.17                 |
| 471.2135 | 1      | 161.3    | (M+Na)+     | -4.34                |
| 472.2058 | 1      | 66.25    | (M+Na)+     | 7.06                 |
| 917.428  | 1      | 326.45   | (2M+Na)+    | -0.41                |
| 918.4279 | 1      | 179.22   | (2M+Na)+    | 2.95                 |
| 919.4261 | 1      | 97.73    | (2M+Na)+    | 4.13                 |
| 922.01   |        | 57476.34 |             |                      |

--- End Of Report ---

# Target Compound Screening Report

|                                 |                                        |                               |                                                     |
|---------------------------------|----------------------------------------|-------------------------------|-----------------------------------------------------|
| <b>Data File</b>                | 49.d                                   | <b>Sample Name</b>            | H2975884                                            |
| <b>Sample Type</b>              | Sample                                 | <b>Position</b>               | P1-F4                                               |
| <b>Instrument Name</b>          | Instrument 1                           | <b>User Name</b>              | Denis V.Bylina                                      |
| <b>Acq Method</b>               | Fast_Gradient_HRMS_pos_Lock_08272019.m | <b>Acquired Time</b>          | 9/22/2021 6:14:33 PM (UTC+03:00)                    |
| <b>IRM Calibration Status</b>   | Success                                | <b>DA Method</b>              | 1.m                                                 |
| <b>Comment</b>                  |                                        | <b>Info.</b>                  | Agilent 6224 TOF LC/MS                              |
| <b>Sample Group</b>             |                                        | <b>Stream Name</b>            | LC 1                                                |
| <b>MFC</b>                      | C22H35N3O5S                            | <b>Acquisition SW Version</b> | 6200 series TOF/6500 series Q-TOF B.08.00 (B8058.0) |
| <b>Acquisition Time (Local)</b> | 9/22/2021 6:14:33 PM (UTC+03:00)       | <b>TOF Firmware Version</b>   | 8.643                                               |
| <b>TOF Driver Version</b>       | 8.00.00                                |                               |                                                     |
| <b>Tune Mass Range Max.</b>     | 1700                                   |                               |                                                     |

## Compound Table

| Label                         | Tgt Score | Mass Error (ppm) | Tgt Formula     | Obs. RT | Ref. Mass | Obs. Mass |
|-------------------------------|-----------|------------------|-----------------|---------|-----------|-----------|
| Cpd 1: C22 H35 N3 O5 S; 3.178 | 95.71     | -0.56            | C22 H35 N3 O5 S | 3.178   | 453.2297  | 453.2295  |

| Obs. m/z | Obs. RT | Obs. Mass | Tgt Formula     | Tgt Mass | Tgt Mass Error (ppm) | RT Diff.        | Find Cpds Algorithm |
|----------|---------|-----------|-----------------|----------|----------------------|-----------------|---------------------|
| 454.2368 | 3.178   | 453.2295  | C22 H35 N3 O5 S | 453.2297 | -0.56                | Find By Formula |                     |

## Compound Chromatograms

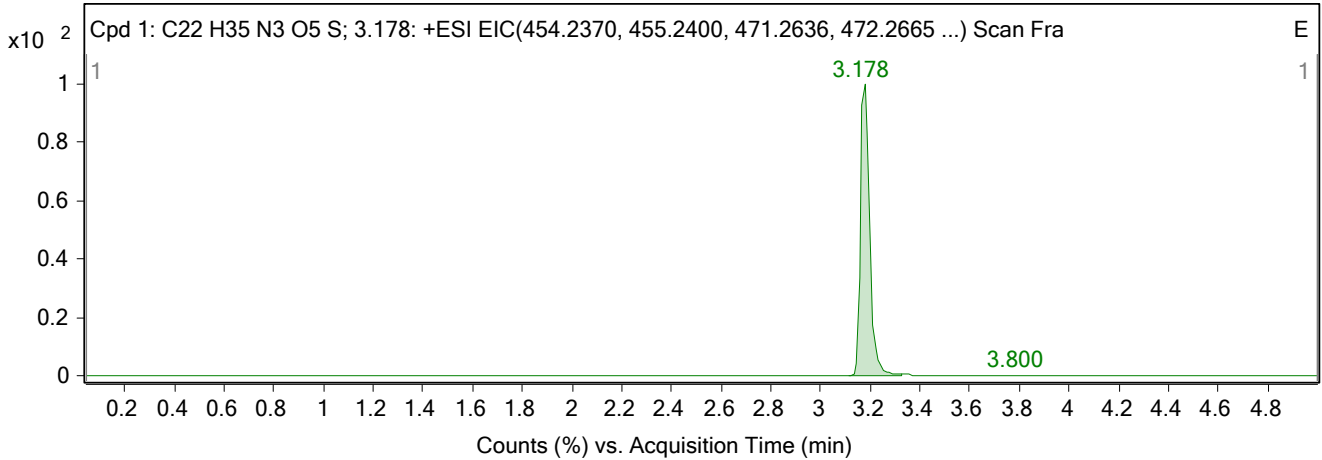

MS Zoomed Spectrum

# Target Compound Screening Report

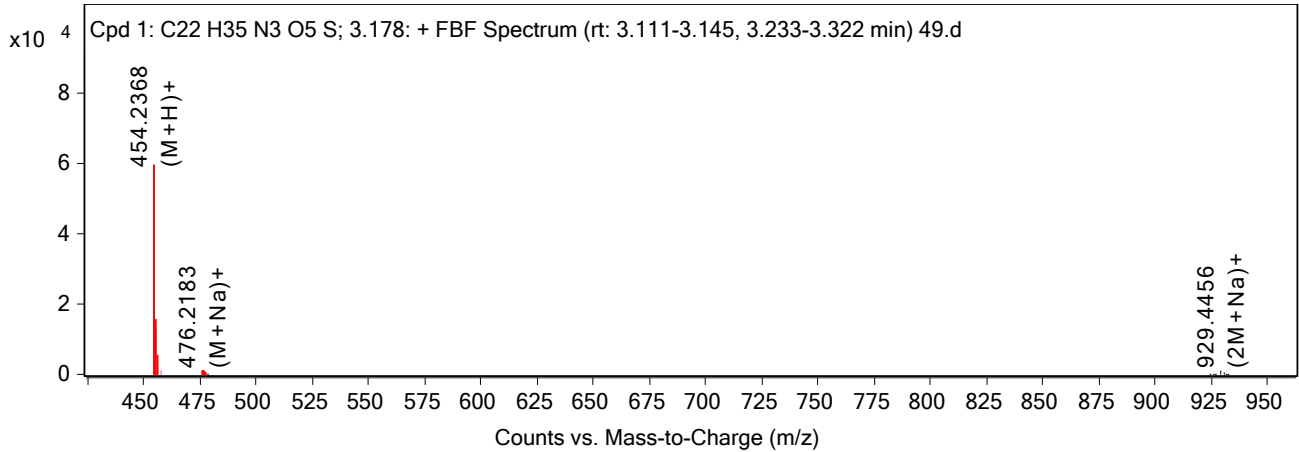

## MS Spectrum Peak List

| Obs. m/z | Charge | Abund    | Ion/Isotope            |
|----------|--------|----------|------------------------|
| 454.2368 | 1      | 59559.87 | (M+H)+                 |
| 455.2398 | 1      | 12940.12 | (M+H)+                 |
| 456.2371 | 1      | 3714.34  | (M+H)+                 |
| 476.2183 | 1      | 937.71   | (M+Na)+                |
| 477.2253 | 1      | 279.42   | (M+Na)+                |
| 924.4896 | 1      | 205.17   | (2M+NH <sub>4</sub> )+ |
| 925.5076 | 1      | 144.6    | (2M+NH <sub>4</sub> )+ |
| 929.4456 | 1      | 952.87   | (2M+Na)+               |
| 930.4483 | 1      | 483.57   | (2M+Na)+               |
| 931.4456 | 1      | 255.81   | (2M+Na)+               |

## MS Zoomed Spectrum

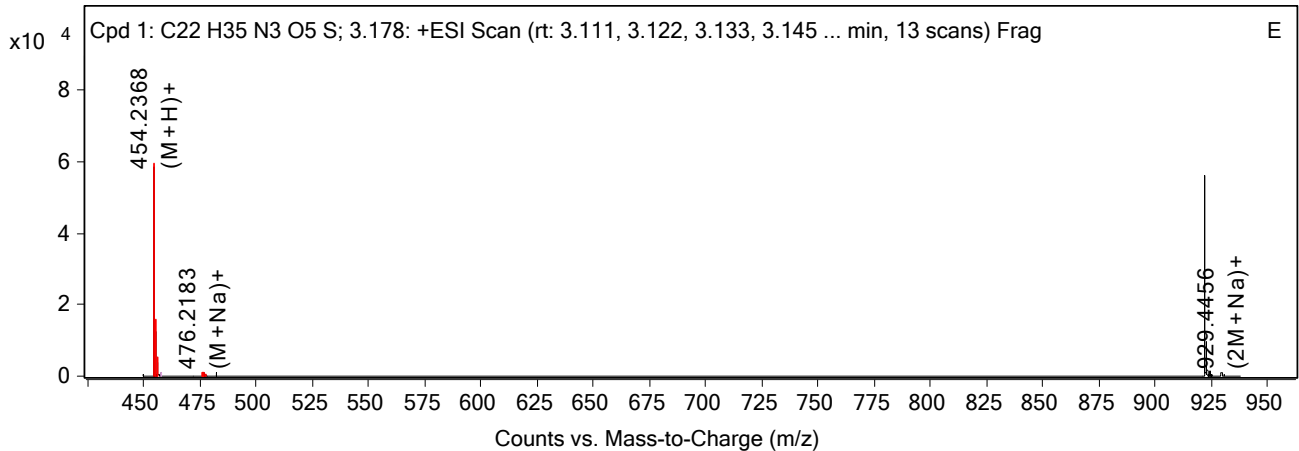

## MS Spectrum Peak List

| Obs. m/z | Charge | Abund    | Ion/Isotope            | Tgt Mass Error (ppm) |
|----------|--------|----------|------------------------|----------------------|
| 454.2368 | 1      | 59559.87 | (M+H)+                 | 0.43                 |
| 455.2398 | 1      | 12940.12 | (M+H)+                 | 0.57                 |
| 456.2371 | 1      | 3714.34  | (M+H)+                 | 1.2                  |
| 476.2183 | 1      | 937.71   | (M+Na)+                | 1.39                 |
| 477.2253 | 1      | 279.42   | (M+Na)+                | -6.9                 |
| 924.4896 | 1      | 205.17   | (2M+NH <sub>4</sub> )+ | 4.05                 |
| 925.5076 | 1      | 144.6    | (2M+NH <sub>4</sub> )+ | -12.24               |
| 929.4456 | 1      | 952.87   | (2M+Na)+               | 3.32                 |
| 930.4483 | 1      | 483.57   | (2M+Na)+               | 3.72                 |
| 931.4456 | 1      | 255.81   | (2M+Na)+               | 5.61                 |

--- End Of Report ---

# Target Compound Screening Report

|                                 |                                        |                               |                                                     |
|---------------------------------|----------------------------------------|-------------------------------|-----------------------------------------------------|
| <b>Data File</b>                | 17.d                                   | <b>Sample Name</b>            | H2978618                                            |
| <b>Sample Type</b>              | Sample                                 | <b>Position</b>               | P1-B8                                               |
| <b>Instrument Name</b>          | Instrument 1                           | <b>User Name</b>              | Denis V.Bylina                                      |
| <b>Acq Method</b>               | Fast_Gradient_HRMS_pos_Lock_08272019.m | <b>Acquired Time</b>          | 9/24/2021 11:47:46 AM (UTC+03:00)                   |
| <b>IRM Calibration Status</b>   | Success                                | <b>DA Method</b>              | 1.m                                                 |
| <b>Comment</b>                  |                                        |                               |                                                     |
| <b>Sample Group</b>             |                                        | <b>Info.</b>                  | Agilent 6224 TOF LC/MS                              |
| <b>MFC</b>                      | C24H35N3O5S                            | <b>Stream Name</b>            | LC 1                                                |
| <b>Acquisition Time (Local)</b> | 9/24/2021 11:47:46 AM (UTC+03:00)      | <b>Acquisition SW Version</b> | 6200 series TOF/6500 series Q-TOF B.08.00 (B8058.0) |
| <b>TOF Driver Version</b>       | 8.00.00                                | <b>TOF Firmware Version</b>   | 8.643                                               |
| <b>Tune Mass Range Max.</b>     | 1700                                   |                               |                                                     |

## Compound Table

| Label                         | Tgt Score | Mass Error (ppm) | Tgt Formula     | Obs. RT | Ref. Mass | Obs. Mass |
|-------------------------------|-----------|------------------|-----------------|---------|-----------|-----------|
| Cpd 1: C24 H35 N3 O5 S; 3.381 | 94.62     | -2.24            | C24 H35 N3 O5 S | 3.381   | 477.2297  | 477.2287  |

| Obs. m/z | Obs. RT | Obs. Mass | Tgt Formula     | Tgt Mass | Tgt Mass Error (ppm) | RT Diff.        | Find Cpds Algorithm |
|----------|---------|-----------|-----------------|----------|----------------------|-----------------|---------------------|
| 478.2361 | 3.381   | 477.2287  | C24 H35 N3 O5 S | 477.2297 | -2.24                | Find By Formula |                     |

## Compound Chromatograms

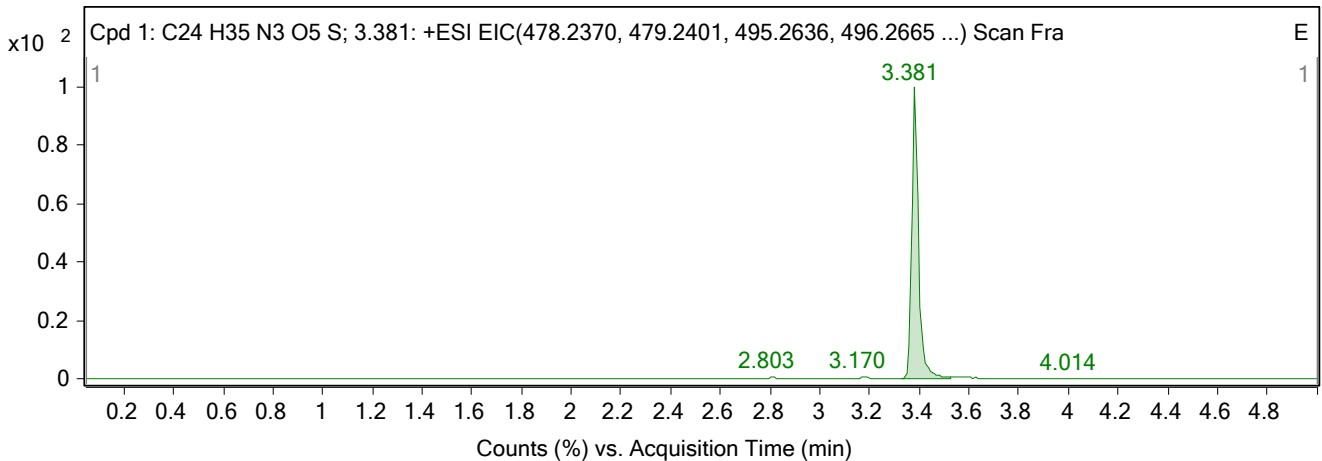

MS Zoomed Spectrum

# Target Compound Screening Report

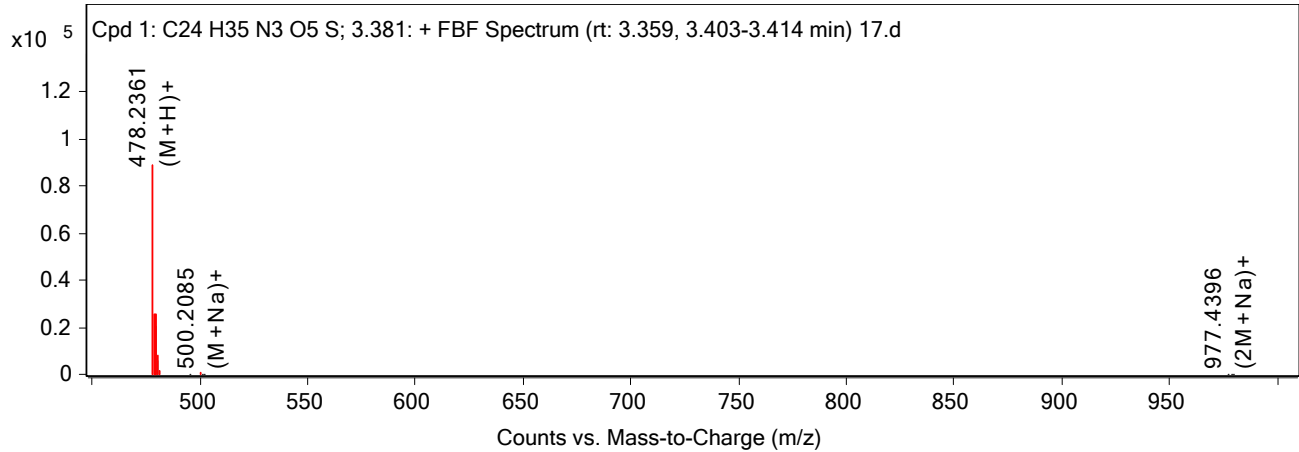

## MS Spectrum Peak List

| Obs. m/z | Charge | Abund    | Ion/Isotope           |
|----------|--------|----------|-----------------------|
| 478.2361 | 1      | 88689.67 | (M+H)+                |
| 479.2389 | 1      | 20597.17 | (M+H)+                |
| 480.2368 | 1      | 6105.07  | (M+H)+                |
| 481.2393 | 1      | 1207.81  | (M+H)+                |
| 495.2572 | 1      | 82.39    | (M+NH <sub>4</sub> )+ |
| 500.2085 | 1      | 465.48   | (M+Na)+               |
| 501.2184 | 1      | 163.59   | (M+Na)+               |
| 502.2081 | 1      | 111.49   | (M+Na)+               |
| 977.4396 | 1      | 194.1    | (2M+Na)+              |
| 978.4271 | 1      | 121.06   | (2M+Na)+              |

## MS Zoomed Spectrum

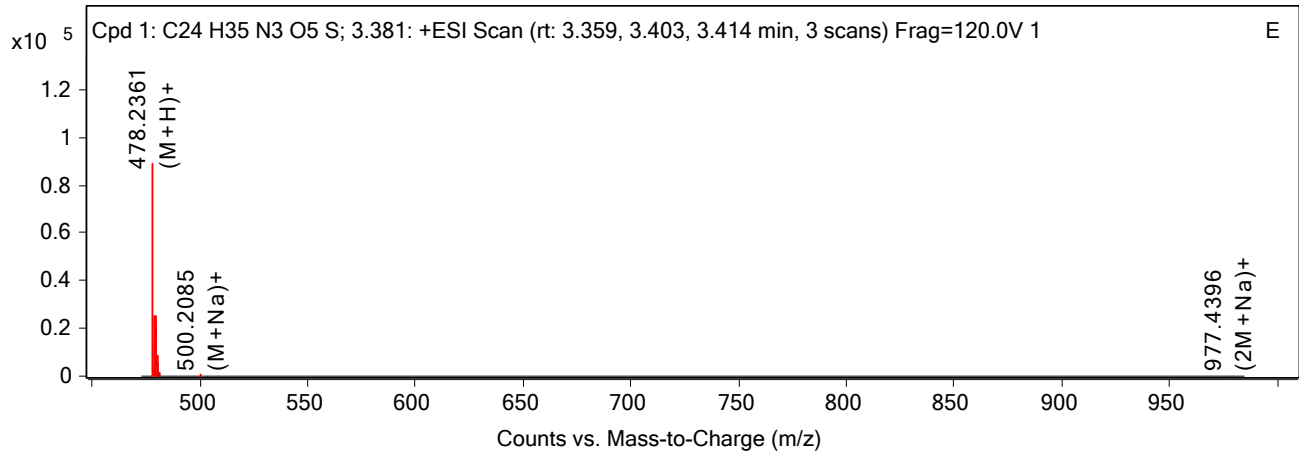

## MS Spectrum Peak List

| Obs. m/z | Charge | Abund    | Ion/Isotope           | Tgt Mass Error (ppm) |
|----------|--------|----------|-----------------------|----------------------|
| 478.2361 | 1      | 88689.67 | (M+H)+                | 1.93                 |
| 479.2389 | 1      | 20597.17 | (M+H)+                | 2.44                 |
| 480.2368 | 1      | 6105.07  | (M+H)+                | 2.57                 |
| 481.2393 | 1      | 1207.81  | (M+H)+                | -0.39                |
| 495.2572 | 1      | 82.39    | (M+NH <sub>4</sub> )+ | 12.76                |
| 500.2085 | 1      | 465.48   | (M+Na)+               | 20.89                |
| 501.2184 | 1      | 163.59   | (M+Na)+               | 7.27                 |
| 502.2081 | 1      | 111.49   | (M+Na)+               | 23.65                |
| 977.4396 | 1      | 194.1    | (2M+Na)+              | 9.27                 |
| 978.4271 | 1      | 121.06   | (2M+Na)+              | 25.15                |

--- End Of Report ---



# Target Compound Screening Report

|                                 |                                        |                               |                                                     |
|---------------------------------|----------------------------------------|-------------------------------|-----------------------------------------------------|
| <b>Data File</b>                | 18.d                                   | <b>Sample Name</b>            | H2975412                                            |
| <b>Sample Type</b>              | Sample                                 | <b>Position</b>               | P1-B9                                               |
| <b>Instrument Name</b>          | Instrument 1                           | <b>User Name</b>              | Denis V.Bylina                                      |
| <b>Acq Method</b>               | Fast_Gradient_HRMS_pos_Lock_08272019.m | <b>Acquired Time</b>          | 9/23/2021 12:51:02 PM (UTC+03:00)                   |
| <b>IRM Calibration Status</b>   | Success                                | <b>DA Method</b>              | 1.m                                                 |
| <b>Comment</b>                  |                                        |                               |                                                     |
| <b>Sample Group</b>             |                                        | <b>Info.</b>                  | Agilent 6224 TOF LC/MS                              |
| <b>MFC</b>                      | C24H34N2O4S                            | <b>Stream Name</b>            | LC 1                                                |
| <b>Acquisition Time (Local)</b> | 9/23/2021 12:51:02 PM (UTC+03:00)      | <b>Acquisition SW Version</b> | 6200 series TOF/6500 series Q-TOF B.08.00 (B8058.0) |
| <b>TOF Driver Version</b>       | 8.00.00                                | <b>TOF Firmware Version</b>   | 8.643                                               |
| <b>Tune Mass Range Max.</b>     | 1700                                   |                               |                                                     |

## Compound Table

| Label                         | Tgt Score | Mass Error (ppm) | Tgt Formula     | Obs. RT | Ref. Mass | Obs. Mass |
|-------------------------------|-----------|------------------|-----------------|---------|-----------|-----------|
| Cpd 1: C24 H34 N2 O4 S; 4.033 | 95.83     | -1.61            | C24 H34 N2 O4 S | 4.033   | 446.2239  | 446.2232  |

| Obs. m/z | Obs. RT | Obs. Mass | Tgt Formula     | Tgt Mass | Tgt Mass Error (ppm) | RT Diff.        | Find Cpds Algorithm |
|----------|---------|-----------|-----------------|----------|----------------------|-----------------|---------------------|
| 447.2307 | 4.033   | 446.2232  | C24 H34 N2 O4 S | 446.2239 | -1.61                | Find By Formula |                     |

## Compound Chromatograms

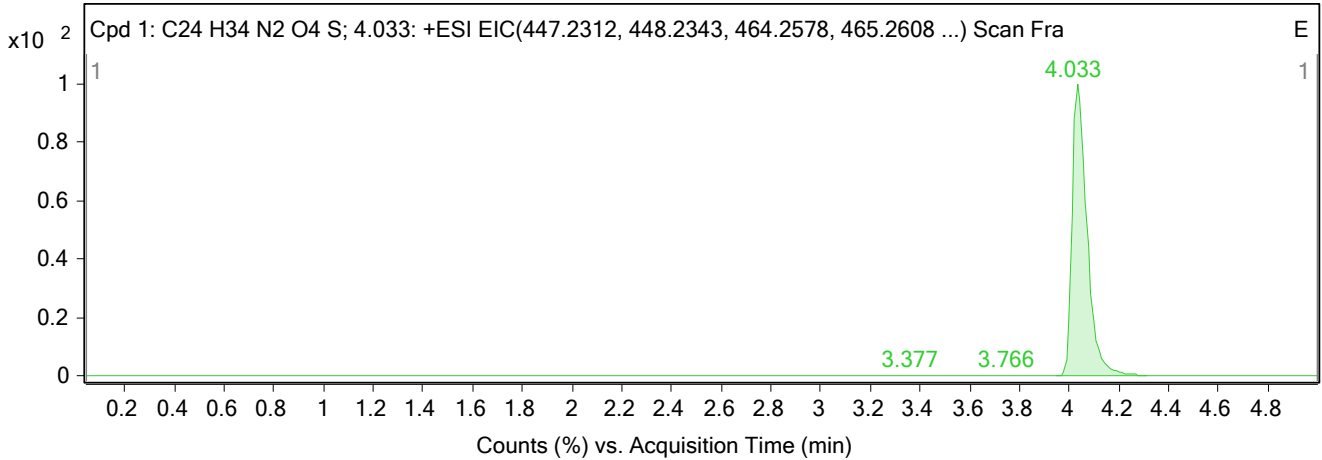

MS Zoomed Spectrum

# Target Compound Screening Report

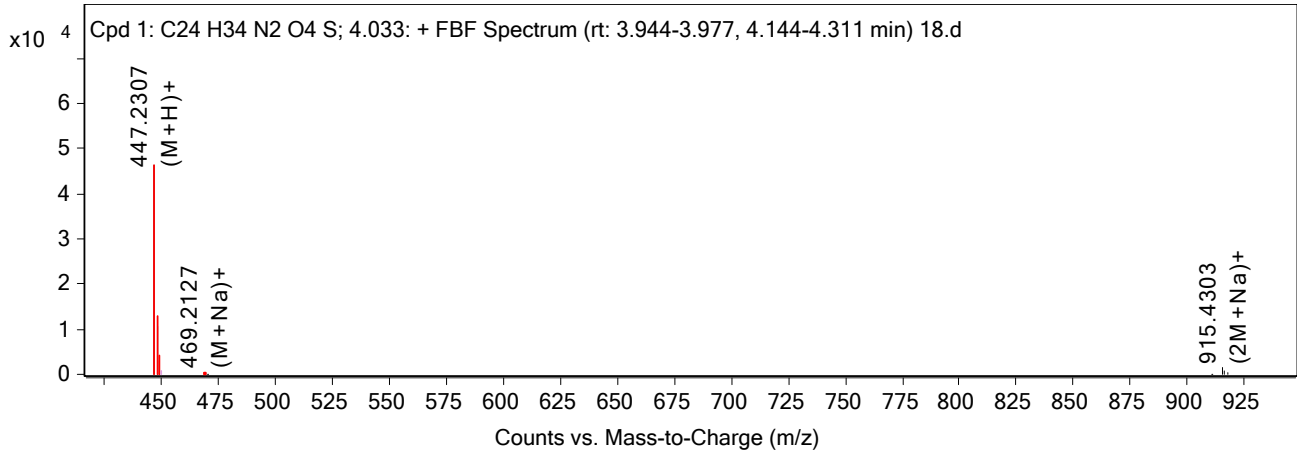

## MS Spectrum Peak List

| Obs. m/z | Charge | Abund    | Ion/Isotope            |
|----------|--------|----------|------------------------|
| 447.2307 | 1      | 46334.3  | (M+H)+                 |
| 448.2338 | 1      | 10819.21 | (M+H)+                 |
| 449.2324 | 1      | 3232.21  | (M+H)+                 |
| 469.2127 | 1      | 504.06   | (M+Na)+                |
| 470.2174 | 1      | 181.63   | (M+Na)+                |
| 910.4763 | 1      | 138.28   | (2M+NH <sub>4</sub> )+ |
| 915.4303 | 1      | 1436.42  | (2M+Na)+               |
| 916.4334 | 1      | 669.26   | (2M+Na)+               |
| 917.4325 | 1      | 372.45   | (2M+Na)+               |

## MS Zoomed Spectrum

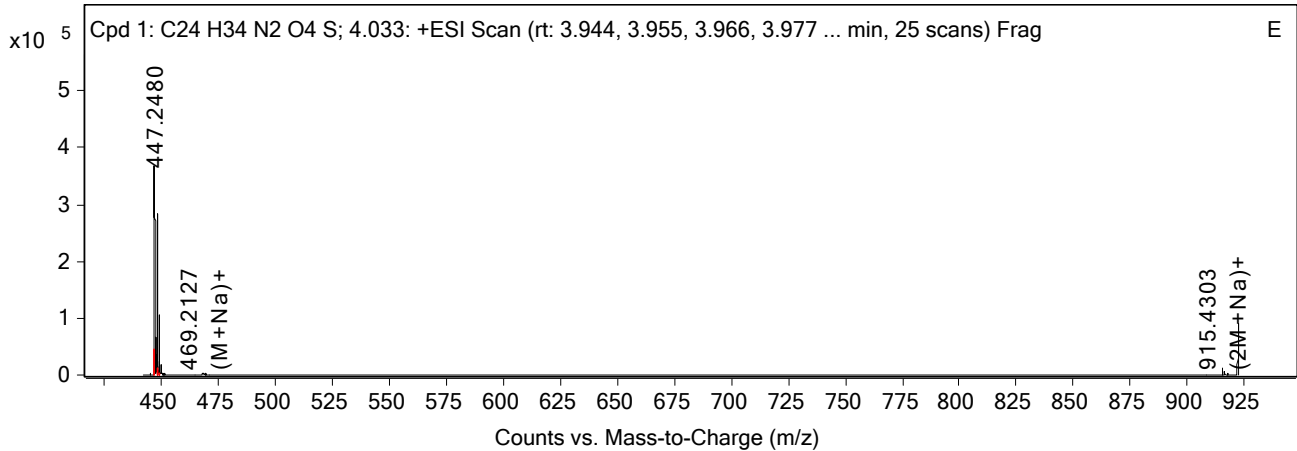

## MS Spectrum Peak List

| Obs. m/z | Charge | Abund     | Ion/Isotope            | Tgt Mass Error (ppm) |
|----------|--------|-----------|------------------------|----------------------|
| 447.2307 | 1      | 46334.3   | (M+H)+                 | 1.1                  |
| 447.248  |        | 367723.65 |                        |                      |
| 448.2338 | 1      | 10819.21  | (M+H)+                 | 1.22                 |
| 449.2324 | 1      | 3232.21   | (M+H)+                 | -0.53                |
| 469.2127 | 1      | 504.06    | (M+Na)+                | 1.05                 |
| 470.2174 | 1      | 181.63    | (M+Na)+                | -2.4                 |
| 910.4763 | 1      | 138.28    | (2M+NH <sub>4</sub> )+ | 5.95                 |
| 915.4303 | 1      | 1436.42   | (2M+Na)+               | 7.37                 |
| 916.4334 | 1      | 669.26    | (2M+Na)+               | 7.45                 |
| 917.4325 | 1      | 372.45    | (2M+Na)+               | 7.71                 |

--- End Of Report ---

# Target Compound Screening Report

|                                 |                                        |                               |                                                     |
|---------------------------------|----------------------------------------|-------------------------------|-----------------------------------------------------|
| <b>Data File</b>                | 43.d                                   | <b>Sample Name</b>            | H2975748                                            |
| <b>Sample Type</b>              | Sample                                 | <b>Position</b>               | P1-E7                                               |
| <b>Instrument Name</b>          | Instrument 1                           | <b>User Name</b>              | Denis V.Bylina                                      |
| <b>Acq Method</b>               | Fast_Gradient_HRMS_pos_Lock_08272019.m | <b>Acquired Time</b>          | 9/22/2021 5:41:13 PM (UTC+03:00)                    |
| <b>IRM Calibration Status</b>   | Success                                | <b>DA Method</b>              | 1.m                                                 |
| <b>Comment</b>                  |                                        |                               |                                                     |
| <b>Sample Group</b>             |                                        | <b>Info.</b>                  | Agilent 6224 TOF LC/MS                              |
| <b>MFC</b>                      | C26H39N3O4S                            | <b>Stream Name</b>            | LC 1                                                |
| <b>Acquisition Time (Local)</b> | 9/22/2021 5:41:13 PM (UTC+03:00)       | <b>Acquisition SW Version</b> | 6200 series TOF/6500 series Q-TOF B.08.00 (B8058.0) |
| <b>TOF Driver Version</b>       | 8.00.00                                | <b>TOF Firmware Version</b>   | 8.643                                               |
| <b>Tune Mass Range Max.</b>     | 1700                                   |                               |                                                     |

## Compound Table

| Label                         | Tgt Score | Mass Error (ppm) | Tgt Formula     | Obs. RT | Ref. Mass | Obs. Mass |
|-------------------------------|-----------|------------------|-----------------|---------|-----------|-----------|
| Cpd 1: C26 H39 N3 O4 S; 3.363 | 97.56     | -0.83            | C26 H39 N3 O4 S | 3.363   | 489.2661  | 489.2657  |

| Obs. m/z | Obs. RT | Obs. Mass | Tgt Formula     | Tgt Mass | Tgt Mass Error (ppm) | RT Diff.        | Find Cpds Algorithm |
|----------|---------|-----------|-----------------|----------|----------------------|-----------------|---------------------|
| 490.273  | 3.363   | 489.2657  | C26 H39 N3 O4 S | 489.2661 | -0.83                | Find By Formula |                     |

## Compound Chromatograms

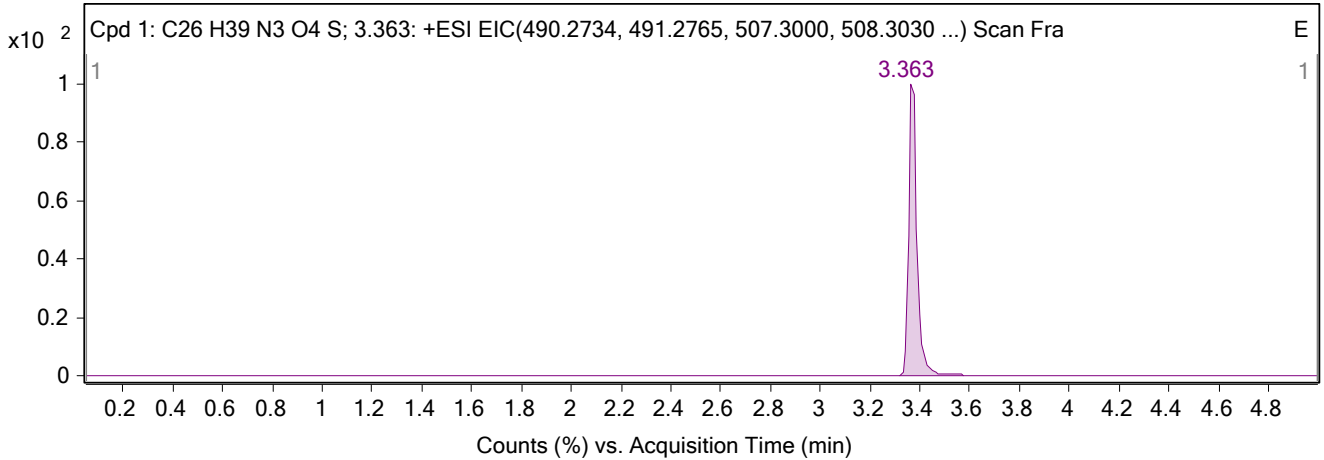

MS Zoomed Spectrum

# Target Compound Screening Report

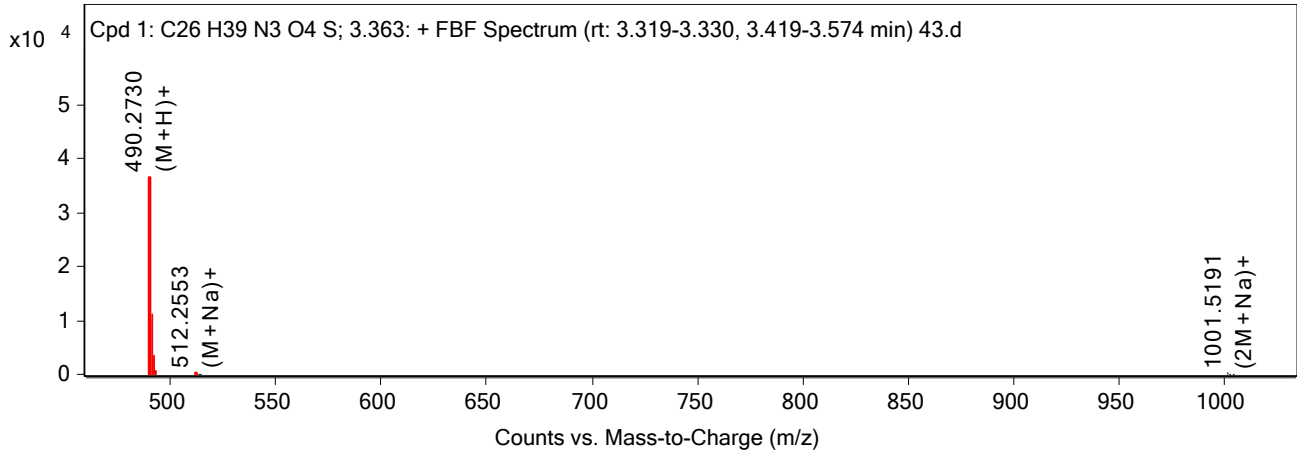

## MS Spectrum Peak List

| Obs. m/z  | Charge | Abund    | Ion/Isotope |
|-----------|--------|----------|-------------|
| 490.273   | 1      | 36668.31 | (M+H)+      |
| 491.276   | 1      | 9851.04  | (M+H)+      |
| 492.2742  | 1      | 2798.04  | (M+H)+      |
| 493.2757  | 1      | 568.28   | (M+H)+      |
| 512.2553  | 1      | 336      | (M+Na)+     |
| 513.2621  | 1      | 137.9    | (M+Na)+     |
| 514.2697  | 1      | 62.76    | (M+Na)+     |
| 1001.5191 | 1      | 244.91   | (2M+Na)+    |
| 1002.5223 | 1      | 152.96   | (2M+Na)+    |
| 1003.5219 | 1      | 79.04    | (2M+Na)+    |

## MS Zoomed Spectrum

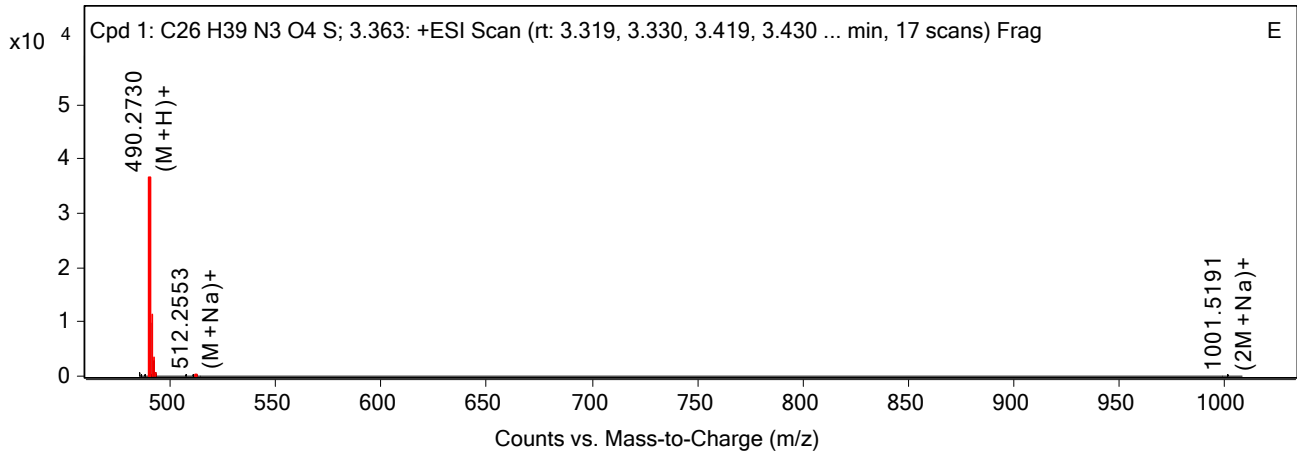

## MS Spectrum Peak List

| Obs. m/z  | Charge | Abund    | Ion/Isotope | Tgt Mass Error (ppm) |
|-----------|--------|----------|-------------|----------------------|
| 490.273   | 1      | 36668.31 | (M+H)+      | 0.83                 |
| 491.276   | 1      | 9851.04  | (M+H)+      | 0.99                 |
| 492.2742  | 1      | 2798.04  | (M+H)+      | 0.93                 |
| 493.2757  | 1      | 568.28   | (M+H)+      | -0.28                |
| 512.2553  | 1      | 336      | (M+Na)+     | 0.02                 |
| 513.2621  | 1      | 137.9    | (M+Na)+     | -7.2                 |
| 514.2697  | 1      | 62.76    | (M+Na)+     | -25.4                |
| 1001.5191 | 1      | 244.91   | (2M+Na)+    | 2.37                 |
| 1002.5223 | 1      | 152.96   | (2M+Na)+    | 2.27                 |
| 1003.5219 | 1      | 79.04    | (2M+Na)+    | 2.43                 |

--- End Of Report ---

# Target Compound Screening Report

|                                 |                                        |                               |                                                     |
|---------------------------------|----------------------------------------|-------------------------------|-----------------------------------------------------|
| <b>Data File</b>                | 14.d                                   | <b>Sample Name</b>            | H2983149                                            |
| <b>Sample Type</b>              | Sample                                 | <b>Position</b>               | P1-B5                                               |
| <b>Instrument Name</b>          | Instrument 1                           | <b>User Name</b>              | Denis V.Bylina                                      |
| <b>Acq Method</b>               | Fast_Gradient_HRMS_pos_Lock_08272019.m | <b>Acquired Time</b>          | 9/22/2021 3:00:06 PM (UTC+03:00)                    |
| <b>IRM Calibration Status</b>   | Success                                | <b>DA Method</b>              | 1.m                                                 |
| <b>Comment</b>                  |                                        | <b>Info.</b>                  | Agilent 6224 TOF LC/MS                              |
| <b>Sample Group</b>             |                                        | <b>Stream Name</b>            | LC 1                                                |
| <b>MFC</b>                      | C23H33N3O5S                            | <b>Acquisition SW Version</b> | 6200 series TOF/6500 series Q-TOF B.08.00 (B8058.0) |
| <b>Acquisition Time (Local)</b> | 9/22/2021 3:00:06 PM (UTC+03:00)       | <b>TOF Firmware Version</b>   | 8.643                                               |
| <b>TOF Driver Version</b>       | 8.00.00                                |                               |                                                     |
| <b>Tune Mass Range Max.</b>     | 1700                                   |                               |                                                     |

## Compound Table

| Label                         | Tgt Score | Mass Error (ppm) | Tgt Formula     | Obs. RT | Ref. Mass | Obs. Mass |
|-------------------------------|-----------|------------------|-----------------|---------|-----------|-----------|
| Cpd 1: C23 H33 N3 O5 S; 3.128 | 96.16     | -0.32            | C23 H33 N3 O5 S | 3.128   | 463.2141  | 463.2139  |

| Obs. m/z | Obs. RT | Obs. Mass | Tgt Formula     | Tgt Mass | Tgt Mass Error (ppm) | RT Diff.        | Find Cpd Algorithm |
|----------|---------|-----------|-----------------|----------|----------------------|-----------------|--------------------|
| 464.2213 | 3.128   | 463.2139  | C23 H33 N3 O5 S | 463.2141 | -0.32                | Find By Formula |                    |

## Compound Chromatograms

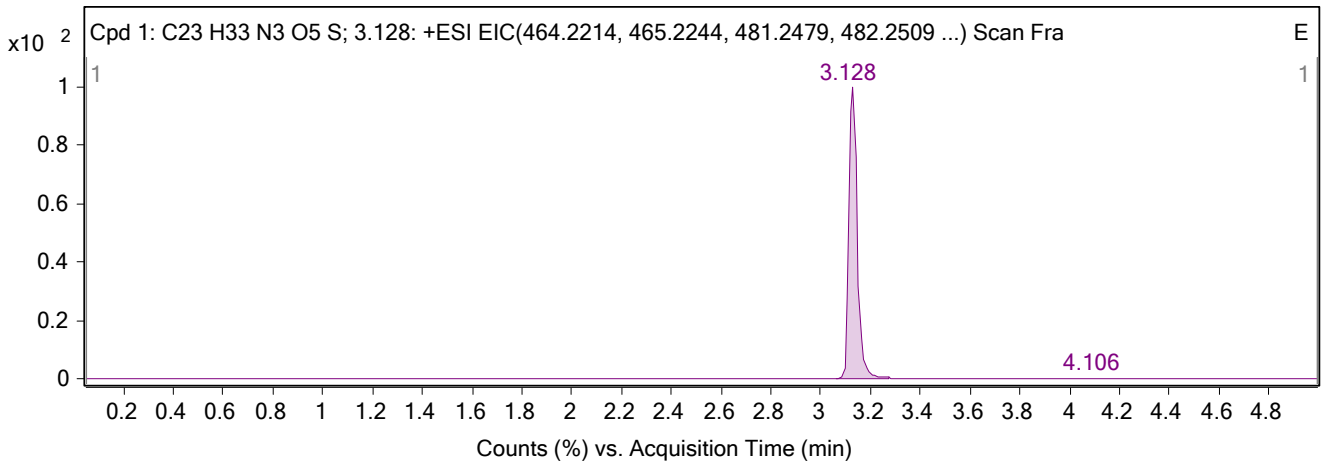

## MS Zoomed Spectrum

# Target Compound Screening Report

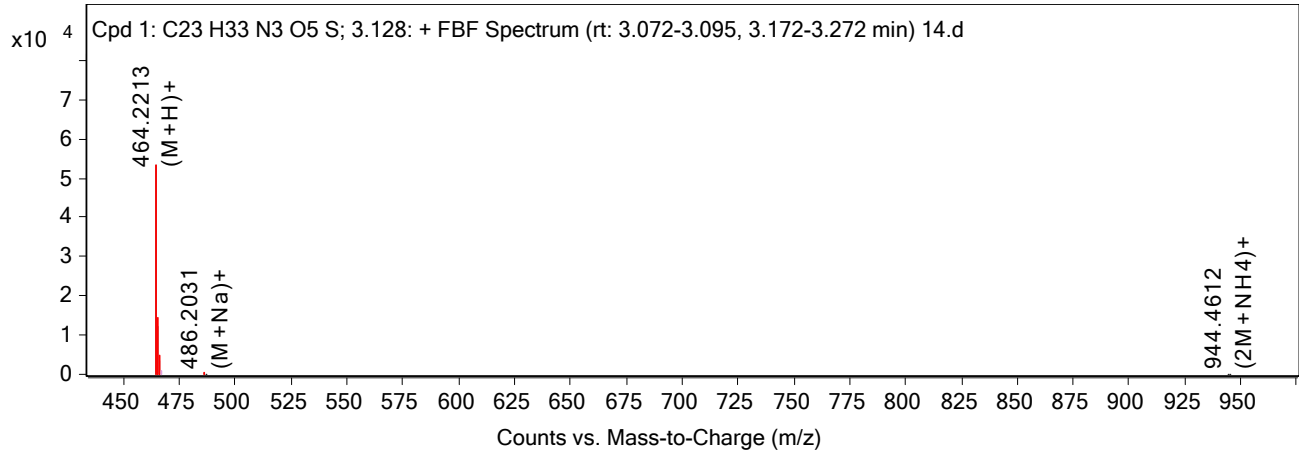

## MS Spectrum Peak List

| Obs. m/z | Charge | Abund    | Ion/Isotope |
|----------|--------|----------|-------------|
| 464.2213 | 1      | 53203.98 | (M+H)+      |
| 465.2241 | 1      | 12226.22 | (M+H)+      |
| 466.2222 | 1      | 3522.03  | (M+H)+      |
| 486.2031 | 1      | 273.43   | (M+Na)+     |
| 487.2065 | 1      | 92.74    | (M+Na)+     |
| 944.4612 | 1      | 83.1     | (2M+NH4)+   |
| 945.4492 | 1      | 60.15    | (2M+NH4)+   |

## MS Zoomed Spectrum

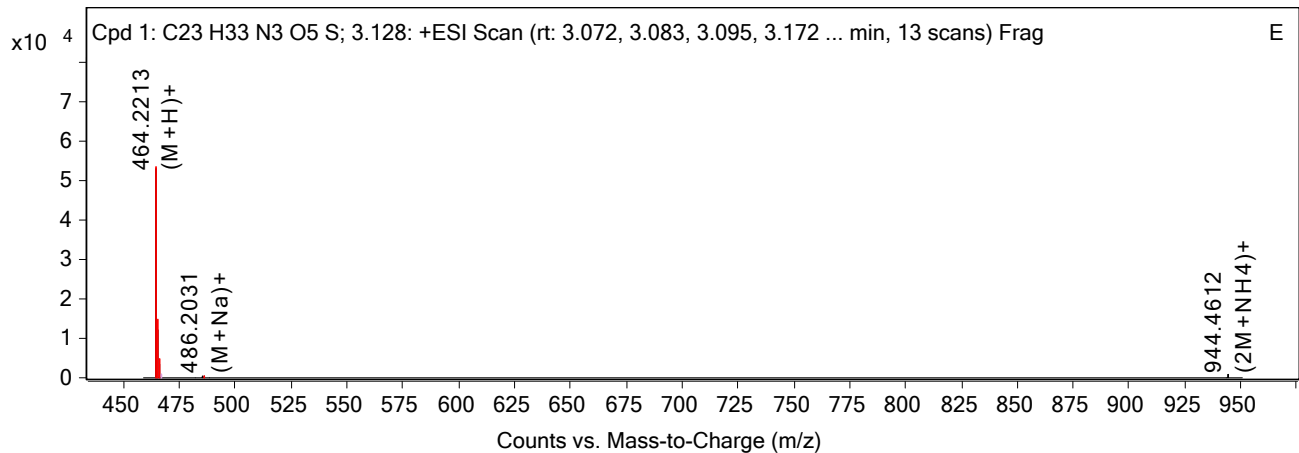

## MS Spectrum Peak List

| Obs. m/z | Charge | Abund    | Ion/Isotope | Tgt Mass Error (ppm) |
|----------|--------|----------|-------------|----------------------|
| 464.2213 | 1      | 53203.98 | (M+H)+      | 0.22                 |
| 465.2241 | 1      | 12226.22 | (M+H)+      | 0.66                 |
| 466.2222 | 1      | 3522.03  | (M+H)+      | -0.05                |
| 486.2031 | 1      | 273.43   | (M+Na)+     | 0.46                 |
| 487.2065 | 1      | 92.74    | (M+Na)+     | -0.3                 |
| 944.4612 | 1      | 83.1     | (2M+NH4)+   | 0.87                 |
| 945.4492 | 1      | 60.15    | (2M+NH4)+   | 16.72                |

--- End Of Report ---

# Target Compound Screening Report

|                                 |                                        |                               |                                                     |
|---------------------------------|----------------------------------------|-------------------------------|-----------------------------------------------------|
| <b>Data File</b>                | 38.d                                   | <b>Sample Name</b>            | H2974256                                            |
| <b>Sample Type</b>              | Sample                                 | <b>Position</b>               | P1-E2                                               |
| <b>Instrument Name</b>          | Instrument 1                           | <b>User Name</b>              | Denis V.Bylina                                      |
| <b>Acq Method</b>               | Fast_Gradient_HRMS_pos_Lock_08272019.m | <b>Acquired Time</b>          | 9/23/2021 10:18:53 PM (UTC+03:00)                   |
| <b>IRM Calibration Status</b>   | Success                                | <b>DA Method</b>              | 1.m                                                 |
| <b>Comment</b>                  |                                        |                               |                                                     |
| <b>Sample Group</b>             |                                        | <b>Info.</b>                  | Agilent 6224 TOF LC/MS                              |
| <b>MFC</b>                      | C22H33N3O6S2                           | <b>Stream Name</b>            | LC 1                                                |
| <b>Acquisition Time (Local)</b> | 9/23/2021 10:18:53 PM (UTC+03:00)      | <b>Acquisition SW Version</b> | 6200 series TOF/6500 series Q-TOF B.08.00 (B8058.0) |
| <b>TOF Driver Version</b>       | 8.00.00                                | <b>TOF Firmware Version</b>   | 8.643                                               |
| <b>Tune Mass Range Max.</b>     | 1700                                   |                               |                                                     |

### Compound Table

| Label                          | Tgt Score | Mass Error (ppm) | Tgt Formula      | Obs. RT | Ref. Mass | Obs. Mass |
|--------------------------------|-----------|------------------|------------------|---------|-----------|-----------|
| Cpd 1: C22 H33 N3 O6 S2; 2.804 | 93.69     | -1.37            | C22 H33 N3 O6 S2 | 2.804   | 499.1811  | 499.1804  |

| Obs. m/z | Obs. RT | Obs. Mass | Tgt Formula      | Tgt Mass | Tgt Mass Error (ppm) | RT Diff.        | Find Cpds Algorithm |
|----------|---------|-----------|------------------|----------|----------------------|-----------------|---------------------|
| 500.1878 | 2.804   | 499.1804  | C22 H33 N3 O6 S2 | 499.1811 | -1.37                | Find By Formula |                     |

### Compound Chromatograms

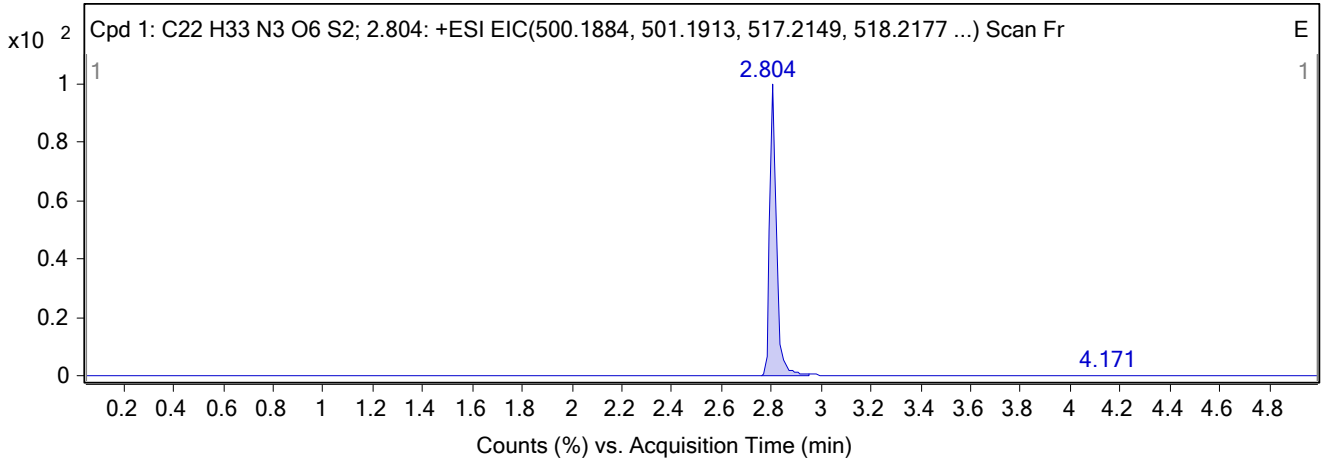

MS Zoomed Spectrum

# Target Compound Screening Report

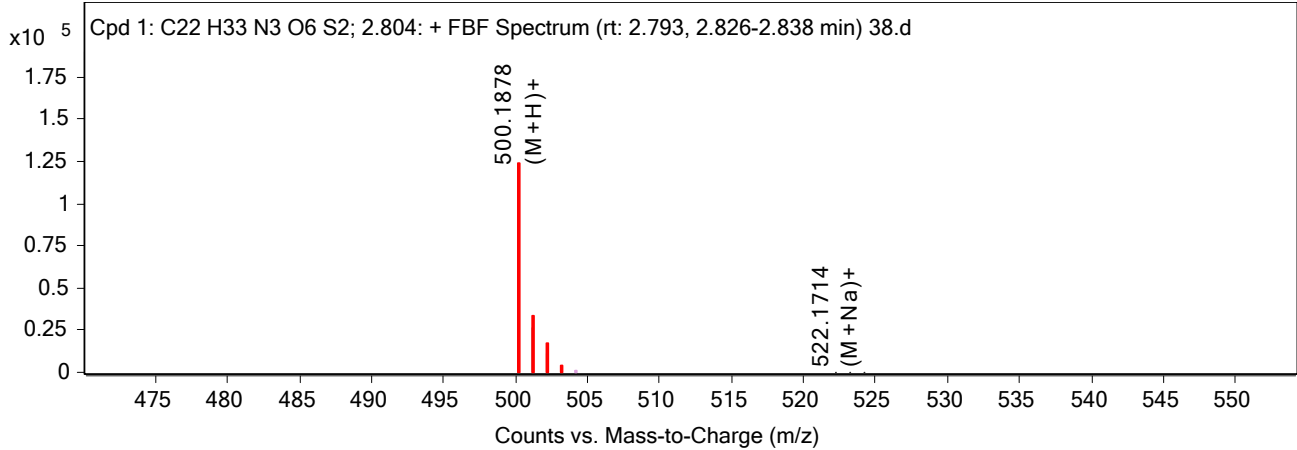

## MS Spectrum Peak List

| Obs. m/z | Charge | Abund     | Ion/Isotope |
|----------|--------|-----------|-------------|
| 500.1878 | 1      | 123840.36 | (M+H)+      |
| 501.1902 | 1      | 26936.81  | (M+H)+      |
| 502.1871 | 1      | 11476.67  | (M+H)+      |
| 503.1866 | 1      | 2343.6    | (M+H)+      |
| 522.1714 | 1      | 209.94    | (M+Na)+     |
| 523.162  | 1      | 60.13     | (M+Na)+     |
| 524.1746 | 1      | 54.33     | (M+Na)+     |

## MS Zoomed Spectrum

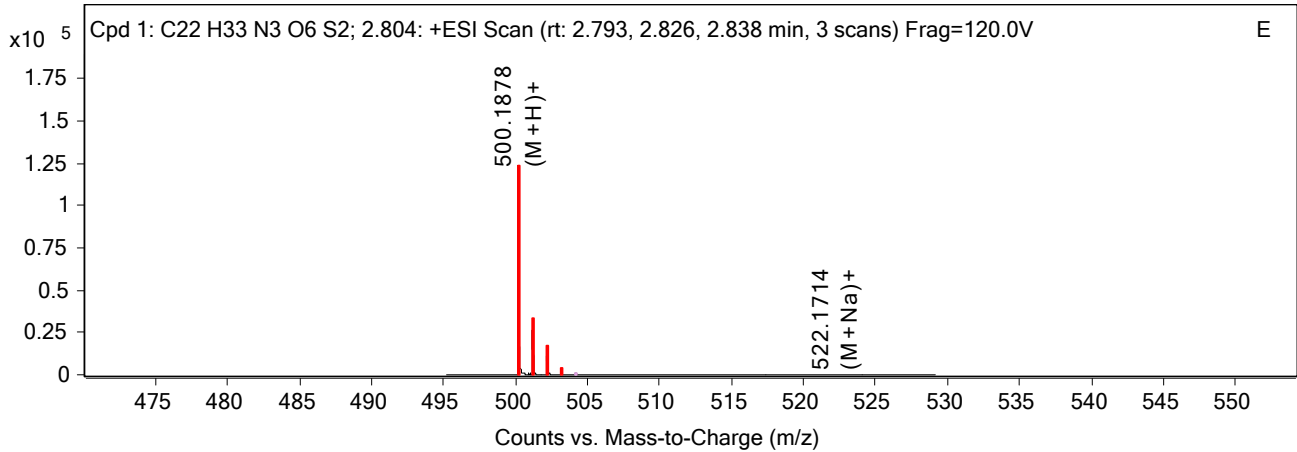

## MS Spectrum Peak List

| Obs. m/z | Charge | Abund     | Ion/Isotope | Tgt Mass Error (ppm) |
|----------|--------|-----------|-------------|----------------------|
| 500.1878 | 1      | 123840.36 | (M+H)+      | 1.18                 |
| 501.1902 | 1      | 26936.81  | (M+H)+      | 2.13                 |
| 502.1871 | 1      | 11476.67  | (M+H)+      | 0.87                 |
| 503.1866 | 1      | 2343.6    | (M+H)+      | 5.03                 |
| 522.1714 | 1      | 209.94    | (M+Na)+     | -2.08                |
| 523.162  | 1      | 60.13     | (M+Na)+     | 21.34                |
| 524.1746 | 1      | 54.33     | (M+Na)+     | -9.93                |

--- End Of Report ---



# Target Compound Screening Report

|                                 |                                        |                               |                                                     |
|---------------------------------|----------------------------------------|-------------------------------|-----------------------------------------------------|
| <b>Data File</b>                | 18.d                                   | <b>Sample Name</b>            | H2978617                                            |
| <b>Sample Type</b>              | Sample                                 | <b>Position</b>               | P1-B9                                               |
| <b>Instrument Name</b>          | Instrument 1                           | <b>User Name</b>              | Denis V.Bylina                                      |
| <b>Acq Method</b>               | Fast_Gradient_HRMS_pos_Lock_08272019.m | <b>Acquired Time</b>          | 9/24/2021 11:53:16 AM (UTC+03:00)                   |
| <b>IRM Calibration Status</b>   | Success                                | <b>DA Method</b>              | 1.m                                                 |
| <b>Comment</b>                  |                                        |                               |                                                     |
| <b>Sample Group</b>             |                                        | <b>Info.</b>                  | Agilent 6224 TOF LC/MS                              |
| <b>MFC</b>                      | C24H37N3O5S                            | <b>Stream Name</b>            | LC 1                                                |
| <b>Acquisition Time (Local)</b> | 9/24/2021 11:53:16 AM (UTC+03:00)      | <b>Acquisition SW Version</b> | 6200 series TOF/6500 series Q-TOF B.08.00 (B8058.0) |
| <b>TOF Driver Version</b>       | 8.00.00                                | <b>TOF Firmware Version</b>   | 8.643                                               |
| <b>Tune Mass Range Max.</b>     | 1700                                   |                               |                                                     |

## Compound Table

| Label                         | Tgt Score | Mass Error (ppm) | Tgt Formula     | Obs. RT | Ref. Mass | Obs. Mass |
|-------------------------------|-----------|------------------|-----------------|---------|-----------|-----------|
| Cpd 1: C24 H37 N3 O5 S; 3.475 | 93.48     | -2.08            | C24 H37 N3 O5 S | 3.475   | 479.2454  | 479.2444  |

| Obs. m/z | Obs. RT | Obs. Mass | Tgt Formula     | Tgt Mass | Tgt Mass Error (ppm) | RT Diff.        | Find Cpds Algorithm |
|----------|---------|-----------|-----------------|----------|----------------------|-----------------|---------------------|
| 480.2518 | 3.475   | 479.2444  | C24 H37 N3 O5 S | 479.2454 | -2.08                | Find By Formula |                     |

## Compound Chromatograms

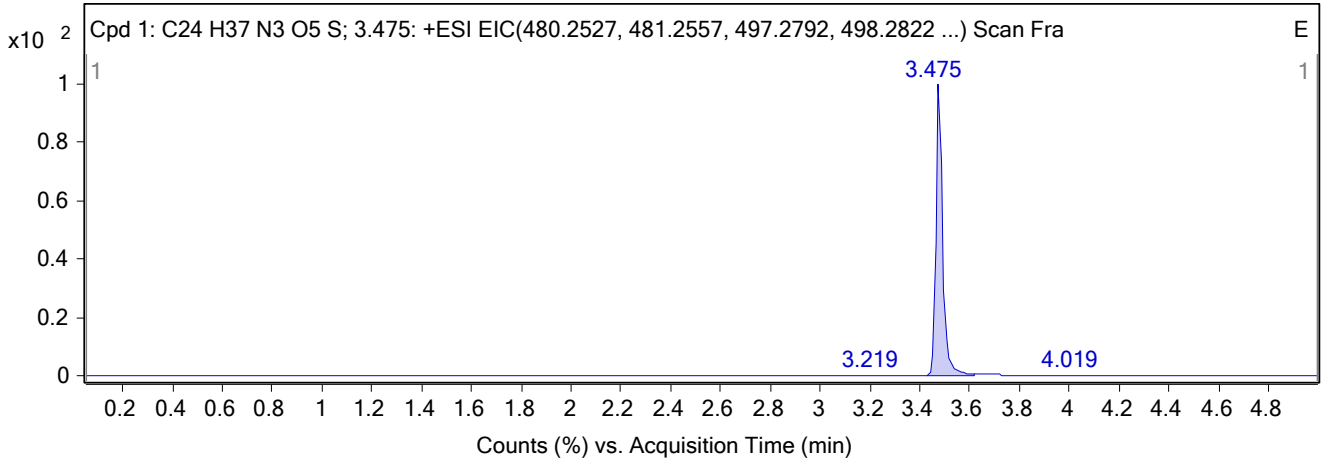

MS Zoomed Spectrum

# Target Compound Screening Report

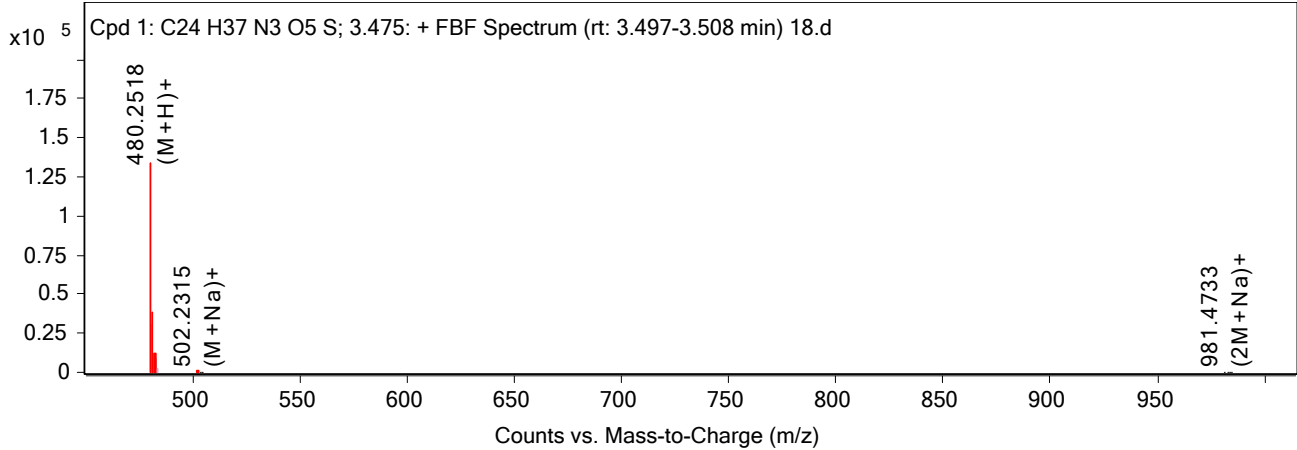

## MS Spectrum Peak List

| Obs. m/z | Charge | Abund     | Ion/Isotope |
|----------|--------|-----------|-------------|
| 480.2518 | 1      | 133490.31 | (M+H)+      |
| 481.2543 | 1      | 30563.98  | (M+H)+      |
| 482.253  | 1      | 8695.6    | (M+H)+      |
| 502.2315 | 1      | 735.07    | (M+Na)+     |
| 503.2363 | 1      | 271.08    | (M+Na)+     |
| 504.2317 | 1      | 138.13    | (M+Na)+     |
| 981.4733 | 1      | 356.76    | (2M+Na)+    |
| 982.4793 | 1      | 161.28    | (2M+Na)+    |
| 983.4922 | 1      | 125.2     | (2M+Na)+    |
| 984.4884 | 1      | 50.44     | (2M+Na)+    |

## MS Zoomed Spectrum

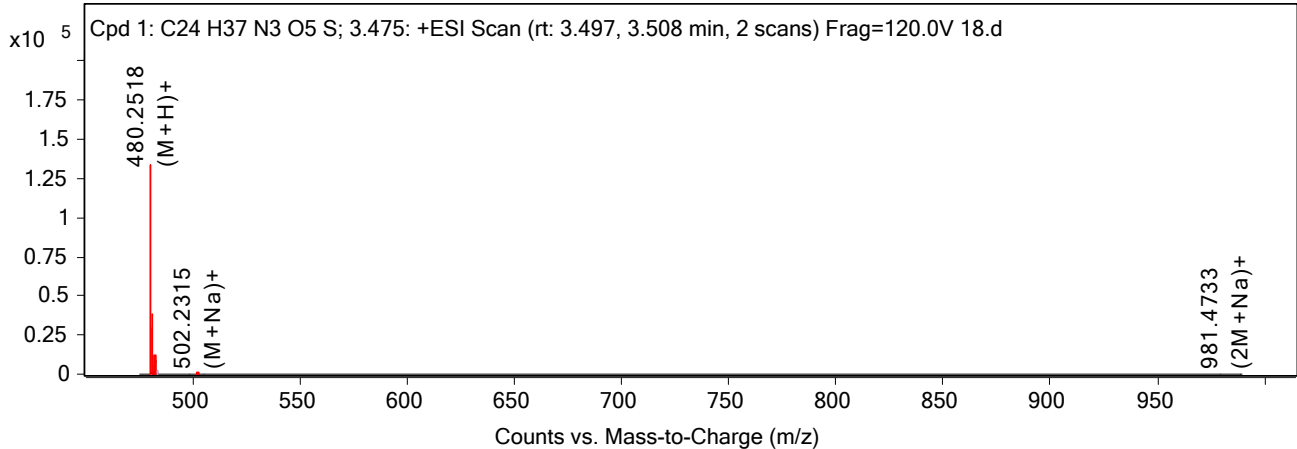

## MS Spectrum Peak List

| Obs. m/z | Charge | Abund     | Ion/Isotope | Tgt Mass Error (ppm) |
|----------|--------|-----------|-------------|----------------------|
| 480.2518 | 1      | 133490.32 | (M+H)+      | 1.89                 |
| 481.2543 | 1      | 30563.98  | (M+H)+      | 2.89                 |
| 482.253  | 1      | 8695.6    | (M+H)+      | 1.37                 |
| 502.2315 | 1      | 735.07    | (M+Na)+     | 6.17                 |
| 503.2363 | 1      | 271.08    | (M+Na)+     | 2.72                 |
| 504.2317 | 1      | 138.13    | (M+Na)+     | 7.66                 |
| 981.4733 | 1      | 356.76    | (2M+Na)+    | 6.79                 |
| 982.4793 | 1      | 161.28    | (2M+Na)+    | 3.83                 |
| 983.4922 | 1      | 125.2     | (2M+Na)+    | -9.84                |
| 984.4884 | 1      | 50.44     | (2M+Na)+    | -5.27                |

--- End Of Report ---

# Target Compound Screening Report

|                                 |                                        |                               |                                                     |
|---------------------------------|----------------------------------------|-------------------------------|-----------------------------------------------------|
| <b>Data File</b>                | 45-2.d                                 | <b>Sample Name</b>            | H2975887                                            |
| <b>Sample Type</b>              | Sample                                 | <b>Position</b>               | P1-E9                                               |
| <b>Instrument Name</b>          | Instrument 1                           | <b>User Name</b>              | Denis V.Bylina                                      |
| <b>Acq Method</b>               | Fast_Gradient_HRMS_pos_Lock_08272019.m | <b>Acquired Time</b>          | 9/22/2021 7:09:18 PM (UTC+03:00)                    |
| <b>IRM Calibration Status</b>   | Success                                | <b>DA Method</b>              | 1.m                                                 |
| <b>Comment</b>                  |                                        |                               |                                                     |
| <b>Sample Group</b>             |                                        | <b>Info.</b>                  | Agilent 6224 TOF LC/MS                              |
| <b>MFC</b>                      | C25H37N3O3S                            | <b>Stream Name</b>            | LC 1                                                |
| <b>Acquisition Time (Local)</b> | 9/22/2021 7:09:18 PM (UTC+03:00)       | <b>Acquisition SW Version</b> | 6200 series TOF/6500 series Q-TOF B.08.00 (B8058.0) |
| <b>TOF Driver Version</b>       | 8.00.00                                | <b>TOF Firmware Version</b>   | 8.643                                               |
| <b>Tune Mass Range Max.</b>     | 1700                                   |                               |                                                     |

## Compound Table

| Label                         | Tgt Score | Mass Error (ppm) | Tgt Formula     | Obs. RT | Ref. Mass | Obs. Mass |
|-------------------------------|-----------|------------------|-----------------|---------|-----------|-----------|
| Cpd 1: C25 H37 N3 O3 S; 3.622 | 95.71     | 0.38             | C25 H37 N3 O3 S | 3.622   | 459.2556  | 459.2557  |

| Obs. m/z | Obs. RT | Obs. Mass | Tgt Formula     | Tgt Mass | Tgt Mass Error (ppm) | RT Diff.        | Find Cpds Algorithm |
|----------|---------|-----------|-----------------|----------|----------------------|-----------------|---------------------|
| 460.2624 | 3.622   | 459.2557  | C25 H37 N3 O3 S | 459.2556 | 0.38                 | Find By Formula |                     |

## Compound Chromatograms

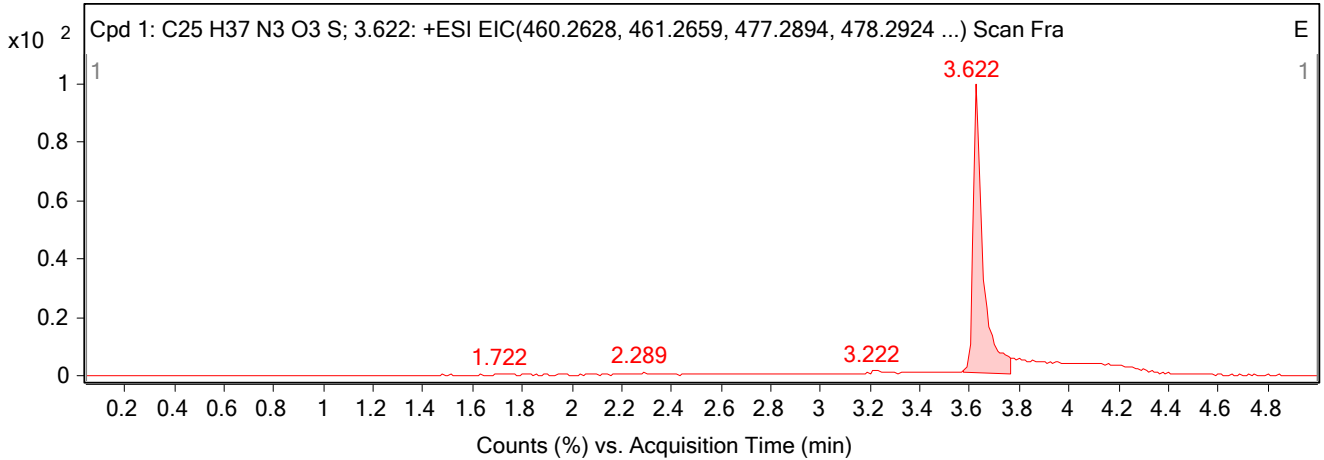

MS Zoomed Spectrum

# Target Compound Screening Report

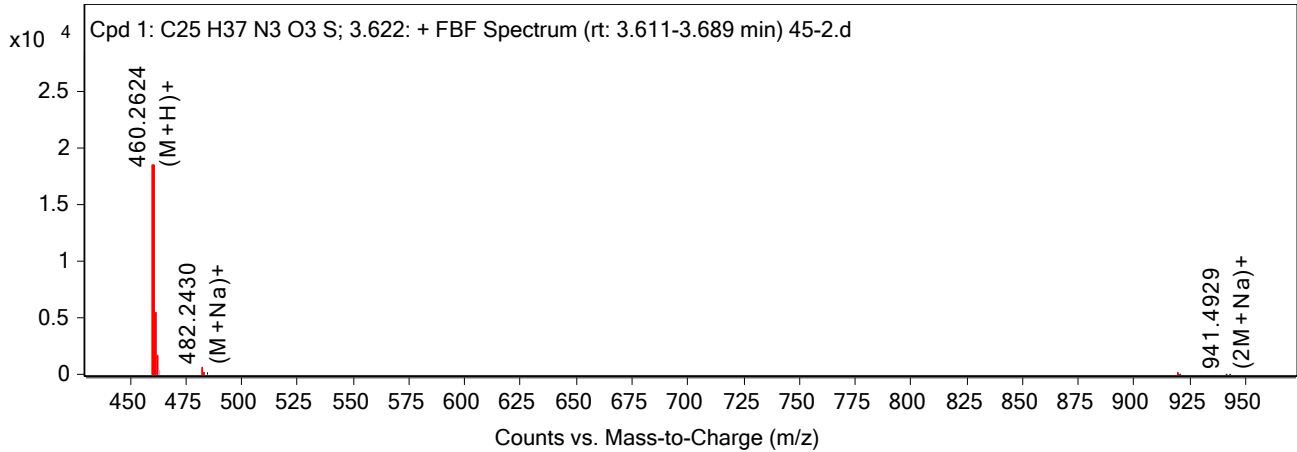

## MS Spectrum Peak List

| Obs. m/z | Charge | Abund    | Ion/Isotope |
|----------|--------|----------|-------------|
| 460.2624 | 1      | 18515.07 | (M+H)+      |
| 461.2674 | 1      | 5413.6   | (M+H)+      |
| 462.267  | 1      | 1583.75  | (M+H)+      |
| 482.243  | 1      | 529.74   | (M+Na)+     |
| 483.2504 | 1      | 221.37   | (M+Na)+     |
| 484.2488 | 1      | 91.77    | (M+Na)+     |
| 919.5129 | 1      | 81.81    | (2M+H)+     |
| 920.5311 | 1      | 56.76    | (2M+H)+     |
| 941.4929 | 1      | 82.33    | (2M+Na)+    |
| 942.4981 | 1      | 46.69    | (2M+Na)+    |

## MS Zoomed Spectrum

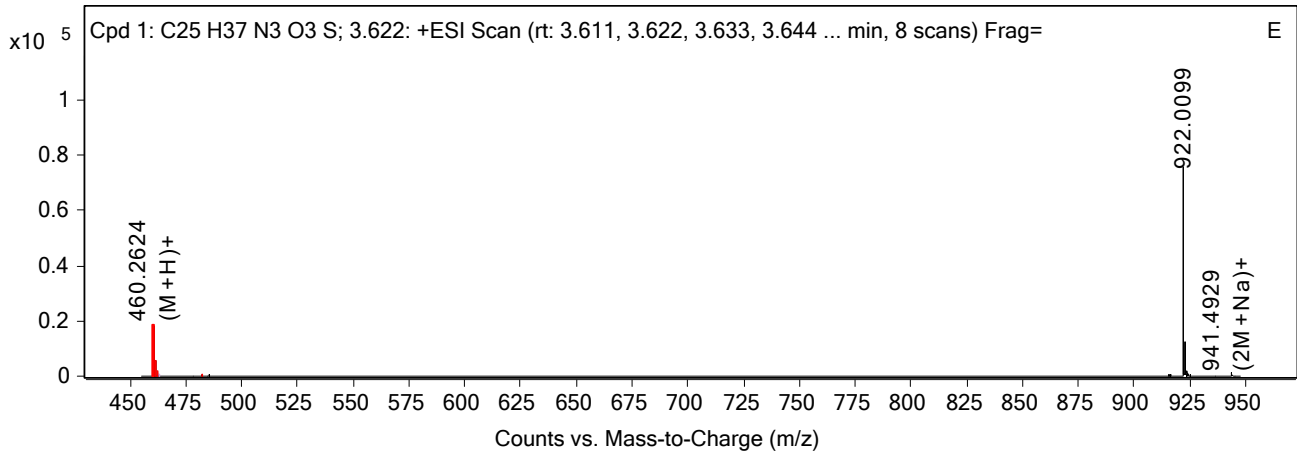

## MS Spectrum Peak List

| Obs. m/z | Charge | Abund    | Ion/Isotope | Tgt Mass Error (ppm) |
|----------|--------|----------|-------------|----------------------|
| 460.2624 | 1      | 18515.07 | (M+H)+      | 0.91                 |
| 461.2674 | 1      | 5413.6   | (M+H)+      | -3.32                |
| 462.267  | 1      | 1583.75  | (M+H)+      | -6.88                |
| 482.243  | 1      | 529.74   | (M+Na)+     | 3.65                 |
| 483.2504 | 1      | 221.37   | (M+Na)+     | -5.28                |
| 484.2488 | 1      | 91.77    | (M+Na)+     | -6.21                |
| 919.5129 | 1      | 81.81    | (2M+H)+     | 5.98                 |
| 920.5311 | 1      | 56.76    | (2M+H)+     | -10.46               |
| 941.4929 | 1      | 82.33    | (2M+Na)+    | 7.89                 |
| 942.4981 | 1      | 46.69    | (2M+Na)+    | 5.64                 |

--- End Of Report ---

# Target Compound Screening Report

|                                 |                                        |                               |                                                     |
|---------------------------------|----------------------------------------|-------------------------------|-----------------------------------------------------|
| <b>Data File</b>                | 14.d                                   | <b>Sample Name</b>            | H2979256                                            |
| <b>Sample Type</b>              | Sample                                 | <b>Position</b>               | P1-B5                                               |
| <b>Instrument Name</b>          | Instrument 1                           | <b>User Name</b>              | Denis V.Bylina                                      |
| <b>Acq Method</b>               | Fast_Gradient_HRMS_pos_Lock_08272019.m | <b>Acquired Time</b>          | 9/23/2021 12:28:43 PM (UTC+03:00)                   |
| <b>IRM Calibration Status</b>   | Success                                | <b>DA Method</b>              | 1.m                                                 |
| <b>Comment</b>                  |                                        | <b>Info.</b>                  | Agilent 6224 TOF LC/MS                              |
| <b>Sample Group</b>             |                                        | <b>Stream Name</b>            | LC 1                                                |
| <b>MFC</b>                      | C23H37N3O5S2                           | <b>Acquisition SW Version</b> | 6200 series TOF/6500 series Q-TOF B.08.00 (B8058.0) |
| <b>Acquisition Time (Local)</b> | 9/23/2021 12:28:43 PM (UTC+03:00)      | <b>TOF Firmware Version</b>   | 8.643                                               |
| <b>TOF Driver Version</b>       | 8.00.00                                |                               |                                                     |
| <b>Tune Mass Range Max.</b>     | 1700                                   |                               |                                                     |

## Compound Table

| Label                          | Tgt Score | Mass Error (ppm) | Tgt Formula      | Obs. RT | Ref. Mass | Obs. Mass |
|--------------------------------|-----------|------------------|------------------|---------|-----------|-----------|
| Cpd 1: C23 H37 N3 O5 S2; 3.464 | 95.11     | -1.08            | C23 H37 N3 O5 S2 | 3.464   | 499.2175  | 499.2169  |

| Obs. m/z | Obs. RT | Obs. Mass | Tgt Formula      | Tgt Mass | Tgt Mass Error (ppm) | RT Diff.        | Find Cpds Algorithm |
|----------|---------|-----------|------------------|----------|----------------------|-----------------|---------------------|
| 500.2243 | 3.464   | 499.2169  | C23 H37 N3 O5 S2 | 499.2175 | -1.08                | Find By Formula |                     |

## Compound Chromatograms

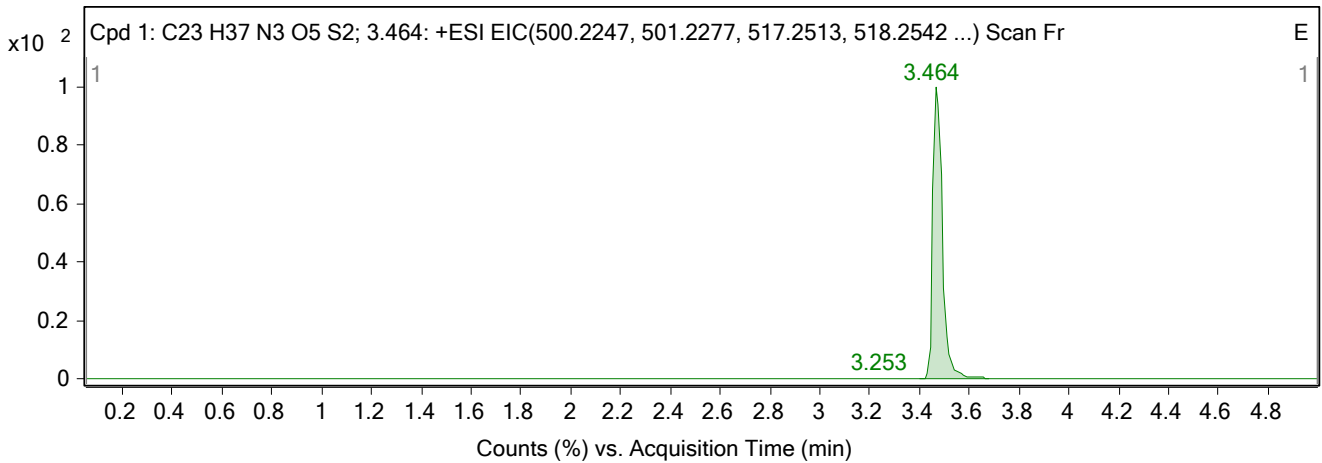

## MS Zoomed Spectrum

## Target Compound Screening Report

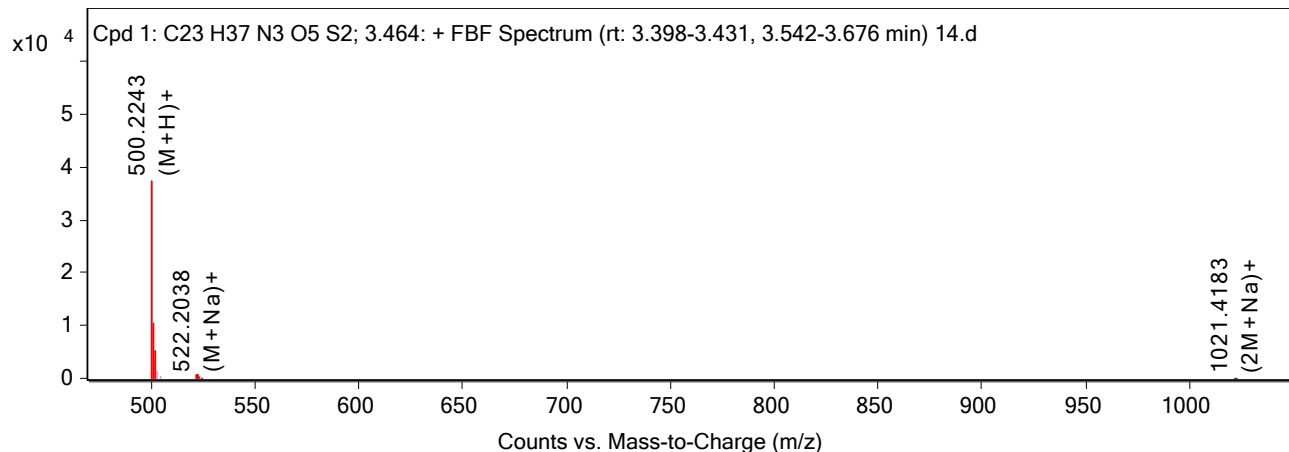

### MS Spectrum Peak List

| Obs. m/z  | Charge | Abund    | Ion/Isotope |
|-----------|--------|----------|-------------|
| 500.2243  | 1      | 37452.68 | (M+H)+      |
| 501.2271  | 1      | 9076.02  | (M+H)+      |
| 502.2229  | 1      | 3887.74  | (M+H)+      |
| 522.2038  | 1      | 485.65   | (M+Na)+     |
| 523.2167  | 1      | 187.5    | (M+Na)+     |
| 524.2092  | 1      | 97.48    | (M+Na)+     |
| 1021.4183 | 1      | 134.94   | (2M+Na)+    |
| 1022.423  | 1      | 90.12    | (2M+Na)+    |

### MS Zoomed Spectrum

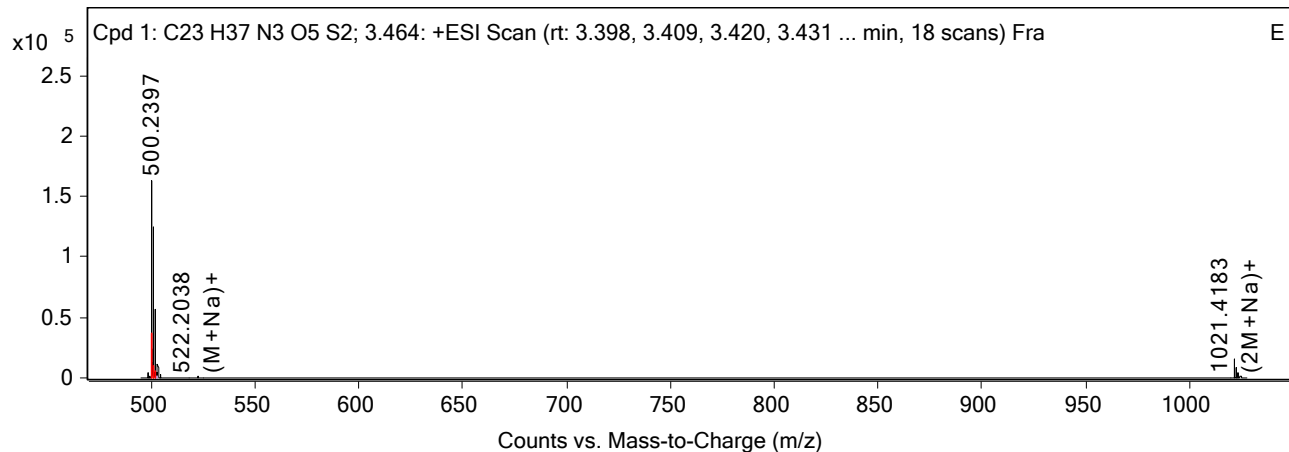

### MS Spectrum Peak List

| Obs. m/z  | Charge | Abund     | Ion/Isotope | Tgt Mass Error (ppm) |
|-----------|--------|-----------|-------------|----------------------|
| 500.2243  | 1      | 37452.68  | (M+H)+      | 0.94                 |
| 500.2397  |        | 163906.14 |             |                      |
| 501.2271  | 1      | 9076.02   | (M+H)+      | 1.14                 |
| 502.2229  | 1      | 3887.74   | (M+H)+      | 2.07                 |
| 522.2038  | 1      | 485.65    | (M+Na)+     | 5.61                 |
| 523.2167  | 1      | 187.5     | (M+Na)+     | -13.48               |
| 524.2092  | 1      | 97.48     | (M+Na)+     | -6.36                |
| 1021.4183 | 1      | 134.94    | (2M+Na)+    | 5.73                 |
| 1022.423  | 1      | 90.12     | (2M+Na)+    | 4.01                 |

--- End Of Report ---

# Target Compound Screening Report

|                                 |                                        |                               |                                                     |
|---------------------------------|----------------------------------------|-------------------------------|-----------------------------------------------------|
| <b>Data File</b>                | 4.d                                    | <b>Sample Name</b>            | H3475353                                            |
| <b>Sample Type</b>              | Sample                                 | <b>Position</b>               | P1-A4                                               |
| <b>Instrument Name</b>          | Instrument 1                           | <b>User Name</b>              | Denis V.Bylina                                      |
| <b>Acq Method</b>               | Fast_Gradient_HRMS_pos_Lock_08272019.m | <b>Acquired Time</b>          | 10/7/2021 4:58:33 PM (UTC+03:00)                    |
| <b>IRM Calibration Status</b>   | Success                                | <b>DA Method</b>              | 1.m                                                 |
| <b>Comment</b>                  |                                        |                               |                                                     |
| <b>Sample Group</b>             |                                        | <b>Info.</b>                  | Agilent 6224 TOF LC/MS                              |
| <b>MFC</b>                      | C22H35N3O5S2                           | <b>Stream Name</b>            | LC 1                                                |
| <b>Acquisition Time (Local)</b> | 10/7/2021 4:58:33 PM (UTC+03:00)       | <b>Acquisition SW Version</b> | 6200 series TOF/6500 series Q-TOF B.08.00 (B8058.0) |
| <b>TOF Driver Version</b>       | 8.00.00                                | <b>TOF Firmware Version</b>   | 8.643                                               |
| <b>Tune Mass Range Max.</b>     | 1700                                   |                               |                                                     |

## Compound Table

| Label                          | Tgt Score | Mass Error (ppm) | Tgt Formula      | Obs. RT | Ref. Mass | Obs. Mass |
|--------------------------------|-----------|------------------|------------------|---------|-----------|-----------|
| Cpd 1: C22 H35 N3 O5 S2; 3.427 | 94.49     | -0.71            | C22 H35 N3 O5 S2 | 3.427   | 485.2018  | 485.2015  |

| Obs. m/z | Obs. RT | Obs. Mass | Tgt Formula      | Tgt Mass | Tgt Mass Error (ppm) | RT Diff.        | Find Cpds Algorithm |
|----------|---------|-----------|------------------|----------|----------------------|-----------------|---------------------|
| 486.2088 | 3.427   | 485.2015  | C22 H35 N3 O5 S2 | 485.2018 | -0.71                | Find By Formula |                     |

## Compound Chromatograms

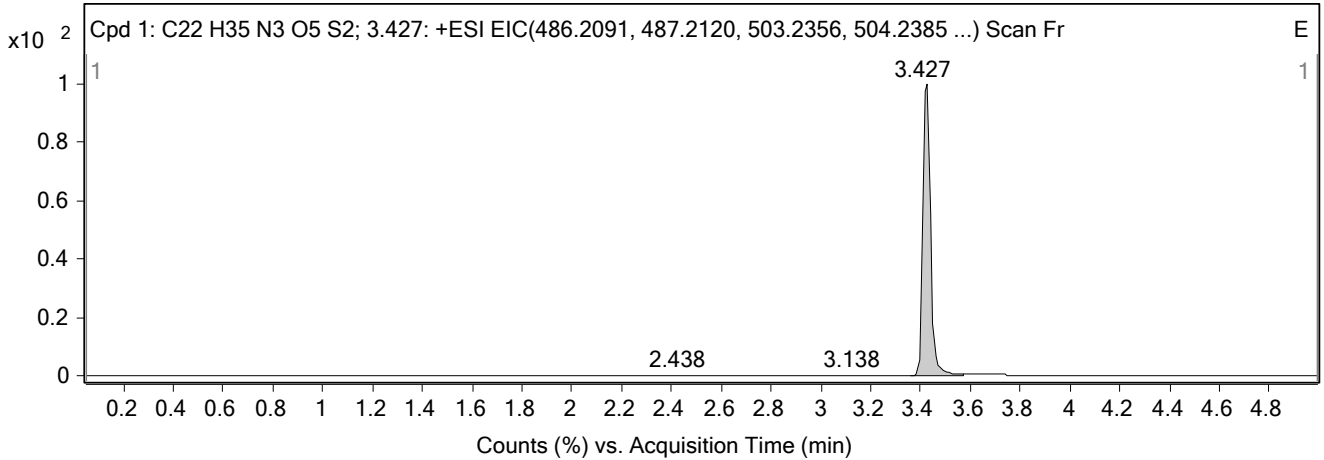

MS Zoomed Spectrum

# Target Compound Screening Report

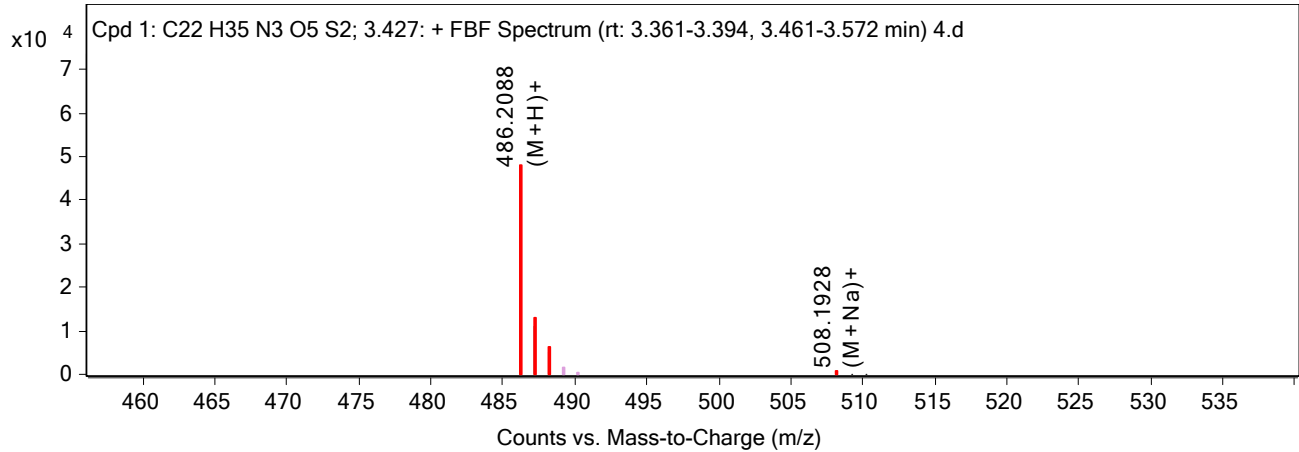

## MS Spectrum Peak List

| Obs. m/z | Charge | Abund    | Ion/Isotope |
|----------|--------|----------|-------------|
| 486.2088 | 1      | 47996.16 | (M+H)+      |
| 487.2119 | 1      | 10956.43 | (M+H)+      |
| 488.2065 | 1      | 5002.01  | (M+H)+      |
| 508.1928 | 1      | 497.22   | (M+Na)+     |
| 509.1965 | 1      | 200.94   | (M+Na)+     |
| 510.1937 | 1      | 153.01   | (M+Na)+     |

## MS Zoomed Spectrum

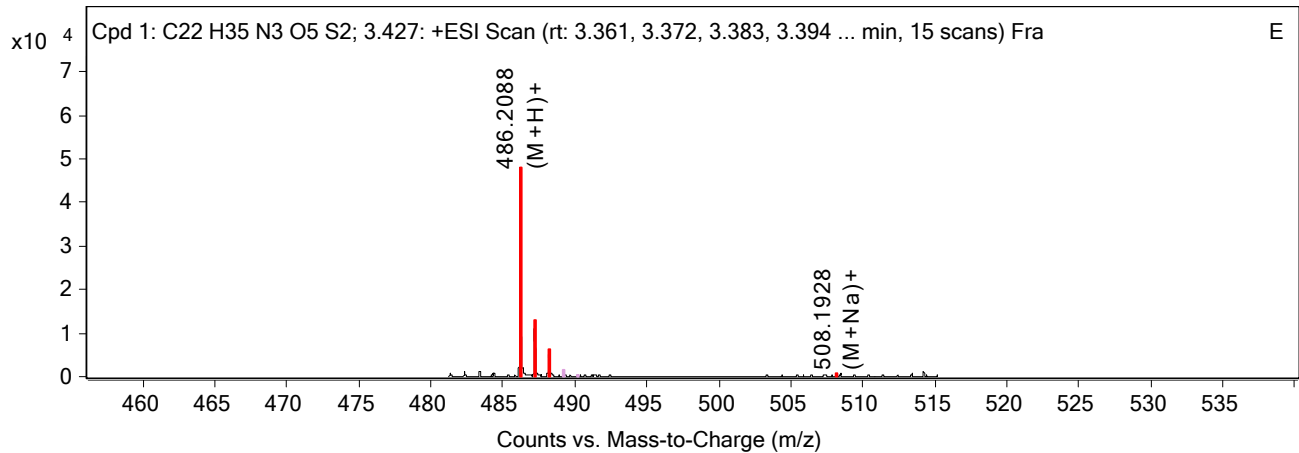

## MS Spectrum Peak List

| Obs. m/z | Charge | Abund    | Ion/Isotope | Tgt Mass Error (ppm) |
|----------|--------|----------|-------------|----------------------|
| 486.2088 | 1      | 47996.16 | (M+H)+      | 0.63                 |
| 486.209  |        | 47996.16 |             |                      |
| 487.2119 | 1      | 10956.43 | (M+H)+      | 0.3                  |
| 488.2065 | 1      | 5002.01  | (M+H)+      | 3.34                 |
| 508.1928 | 1      | 497.22   | (M+Na)+     | -3.5                 |
| 509.1965 | 1      | 200.94   | (M+Na)+     | -4.99                |
| 510.1937 | 1      | 153.01   | (M+Na)+     | -7.1                 |

--- End Of Report ---



# Target Compound Screening Report

|                                 |                                        |                               |                                                     |
|---------------------------------|----------------------------------------|-------------------------------|-----------------------------------------------------|
| <b>Data File</b>                | 13.d                                   | <b>Sample Name</b>            | H2983886                                            |
| <b>Sample Type</b>              | Sample                                 | <b>Position</b>               | P1-B4                                               |
| <b>Instrument Name</b>          | Instrument 1                           | <b>User Name</b>              | Denis V.Bylina                                      |
| <b>Acq Method</b>               | Fast_Gradient_HRMS_pos_Lock_08272019.m | <b>Acquired Time</b>          | 9/24/2021 11:23:48 AM (UTC+03:00)                   |
| <b>IRM Calibration Status</b>   | Success                                | <b>DA Method</b>              | 1.m                                                 |
| <b>Comment</b>                  |                                        |                               |                                                     |
| <b>Sample Group</b>             |                                        | <b>Info.</b>                  | Agilent 6224 TOF LC/MS                              |
| <b>MFC</b>                      | C22H33N3O5S                            | <b>Stream Name</b>            | LC 1                                                |
| <b>Acquisition Time (Local)</b> | 9/24/2021 11:23:48 AM (UTC+03:00)      | <b>Acquisition SW Version</b> | 6200 series TOF/6500 series Q-TOF B.08.00 (B8058.0) |
| <b>TOF Driver Version</b>       | 8.00.00                                | <b>TOF Firmware Version</b>   | 8.643                                               |
| <b>Tune Mass Range Max.</b>     | 1700                                   |                               |                                                     |

## Compound Table

| Label                         | Tgt Score | Mass Error (ppm) | Tgt Formula     | Obs. RT | Ref. Mass | Obs. Mass |
|-------------------------------|-----------|------------------|-----------------|---------|-----------|-----------|
| Cpd 1: C22 H33 N3 O5 S; 3.059 | 94.72     | -1.87            | C22 H33 N3 O5 S | 3.059   | 451.2141  | 451.2132  |

| Obs. m/z | Obs. RT | Obs. Mass | Tgt Formula     | Tgt Mass | Tgt Mass Error (ppm) | RT Diff.        | Find Cps Algorithm |
|----------|---------|-----------|-----------------|----------|----------------------|-----------------|--------------------|
| 452.2205 | 3.059   | 451.2132  | C22 H33 N3 O5 S | 451.2141 | -1.87                | Find By Formula |                    |

## Compound Chromatograms

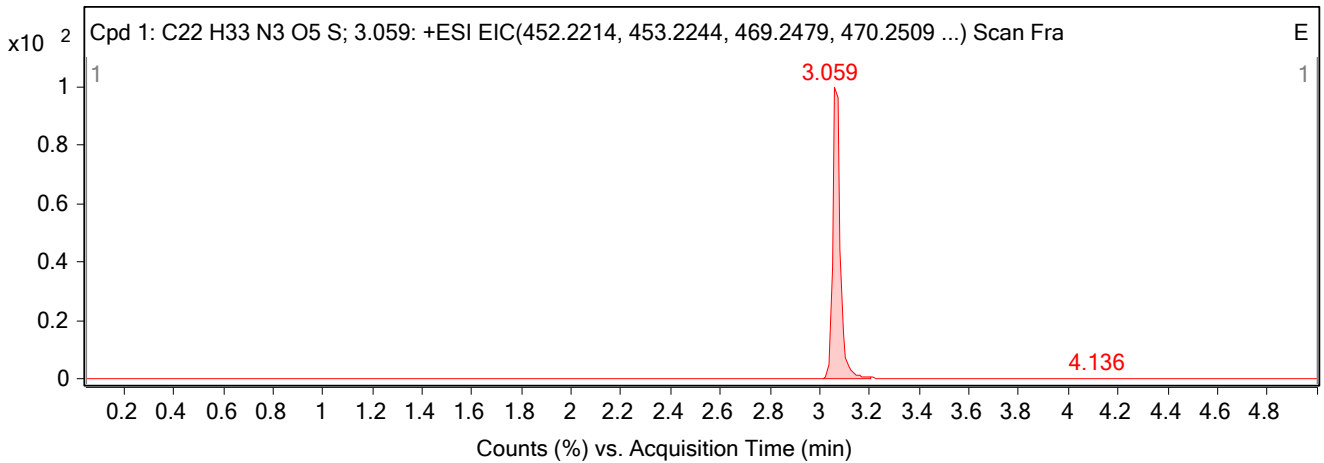

MS Zoomed Spectrum

# Target Compound Screening Report

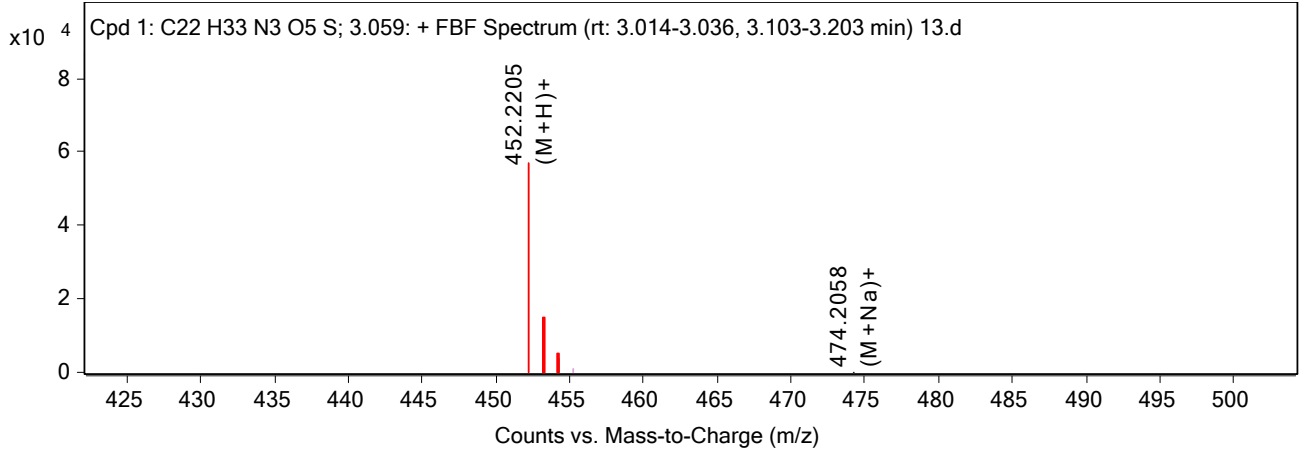

## MS Spectrum Peak List

| Obs. m/z | Charge | Abund    | Ion/Isotope |
|----------|--------|----------|-------------|
| 452.2205 | 1      | 56862.88 | (M+H)+      |
| 453.2235 | 1      | 12157.67 | (M+H)+      |
| 454.2215 | 1      | 3679.68  | (M+H)+      |
| 474.2058 | 1      | 129.32   | (M+Na)+     |

## MS Zoomed Spectrum

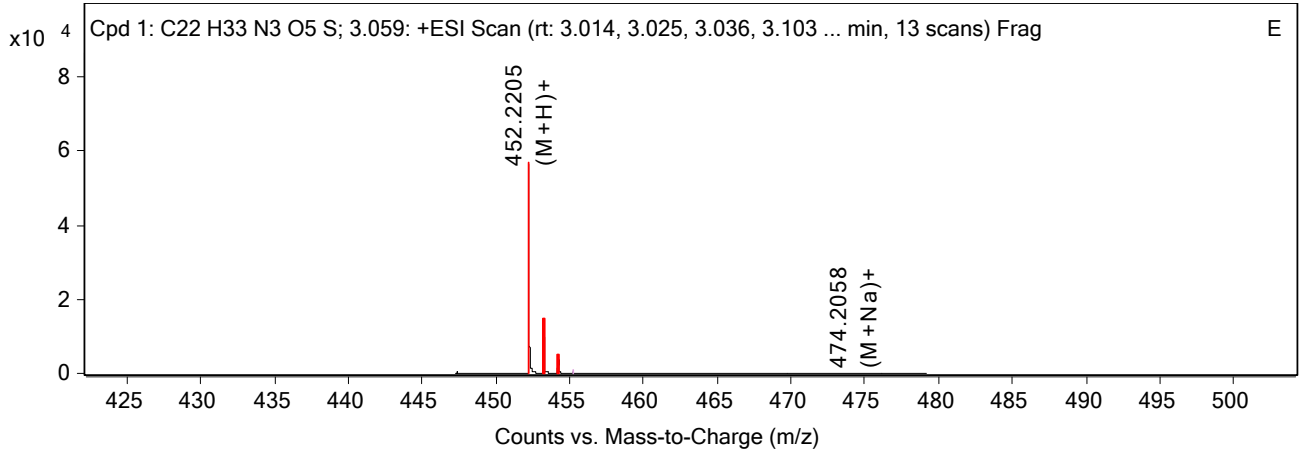

## MS Spectrum Peak List

| Obs. m/z | Charge | Abund    | Ion/Isotope | Tgt Mass Error (ppm) |
|----------|--------|----------|-------------|----------------------|
| 452.2205 | 1      | 56862.88 | (M+H)+      | 1.93                 |
| 452.2205 | 1      | 56862.88 | (M+H)+      |                      |
| 453.2235 | 1      | 12157.67 | (M+H)+      | 1.89                 |
| 454.2215 | 1      | 3679.68  | (M+H)+      | 1.12                 |
| 474.2058 | 1      | 129.32   | (M+Na)+     | -5.26                |

--- End Of Report ---

# Target Compound Screening Report

|                                 |                                        |                               |                                                     |
|---------------------------------|----------------------------------------|-------------------------------|-----------------------------------------------------|
| <b>Data File</b>                | 44.d                                   | <b>Sample Name</b>            | H2974264                                            |
| <b>Sample Type</b>              | Sample                                 | <b>Position</b>               | P1-E8                                               |
| <b>Instrument Name</b>          | Instrument 1                           | <b>User Name</b>              | Denis V.Bylina                                      |
| <b>Acq Method</b>               | Fast_Gradient_HRMS_pos_Lock_08272019.m | <b>Acquired Time</b>          | 9/22/2021 5:46:48 PM (UTC+03:00)                    |
| <b>IRM Calibration Status</b>   | Success                                | <b>DA Method</b>              | 1.m                                                 |
| <b>Comment</b>                  |                                        |                               |                                                     |
| <b>Sample Group</b>             |                                        | <b>Info.</b>                  | Agilent 6224 TOF LC/MS                              |
| <b>MFC</b>                      | C23H37N3O5S                            | <b>Stream Name</b>            | LC 1                                                |
| <b>Acquisition Time (Local)</b> | 9/22/2021 5:46:48 PM (UTC+03:00)       | <b>Acquisition SW Version</b> | 6200 series TOF/6500 series Q-TOF B.08.00 (B8058.0) |
| <b>TOF Driver Version</b>       | 8.00.00                                | <b>TOF Firmware Version</b>   | 8.643                                               |
| <b>Tune Mass Range Max.</b>     | 1700                                   |                               |                                                     |

## Compound Table

| Label                         | Tgt Score | Mass Error (ppm) | Tgt Formula     | Obs. RT | Ref. Mass | Obs. Mass |
|-------------------------------|-----------|------------------|-----------------|---------|-----------|-----------|
| Cpd 1: C23 H37 N3 O5 S; 3.194 | 97.49     | 0.84             | C23 H37 N3 O5 S | 3.194   | 467.2454  | 467.2458  |

| Obs. m/z | Obs. RT | Obs. Mass | Tgt Formula     | Tgt Mass | Tgt Mass Error (ppm) | RT Diff.        | Find Cpds Algorithm |
|----------|---------|-----------|-----------------|----------|----------------------|-----------------|---------------------|
| 468.2526 | 3.194   | 467.2458  | C23 H37 N3 O5 S | 467.2454 | 0.84                 | Find By Formula |                     |

## Compound Chromatograms

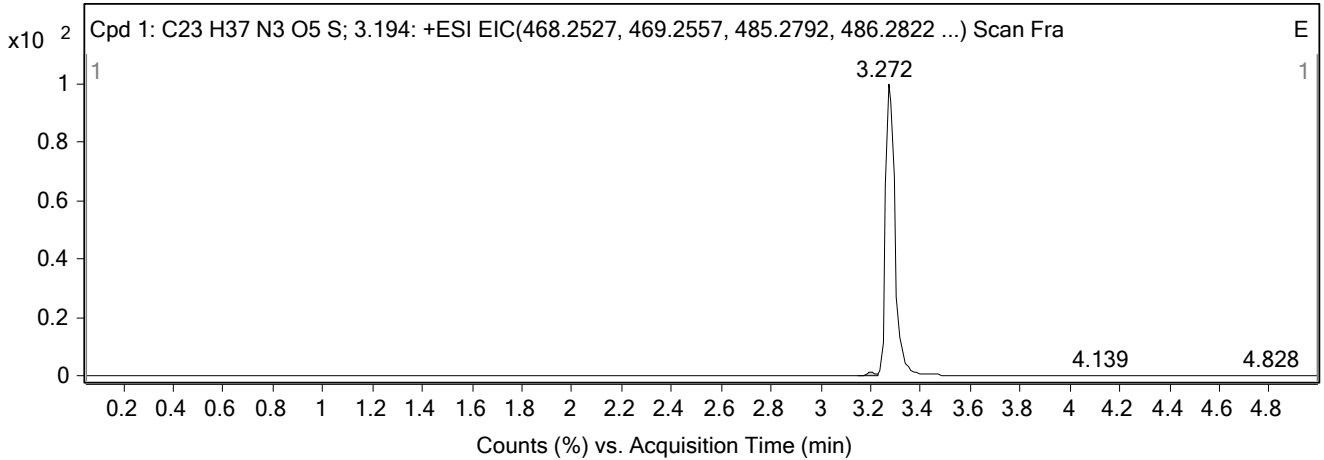

MS Zoomed Spectrum

# Target Compound Screening Report

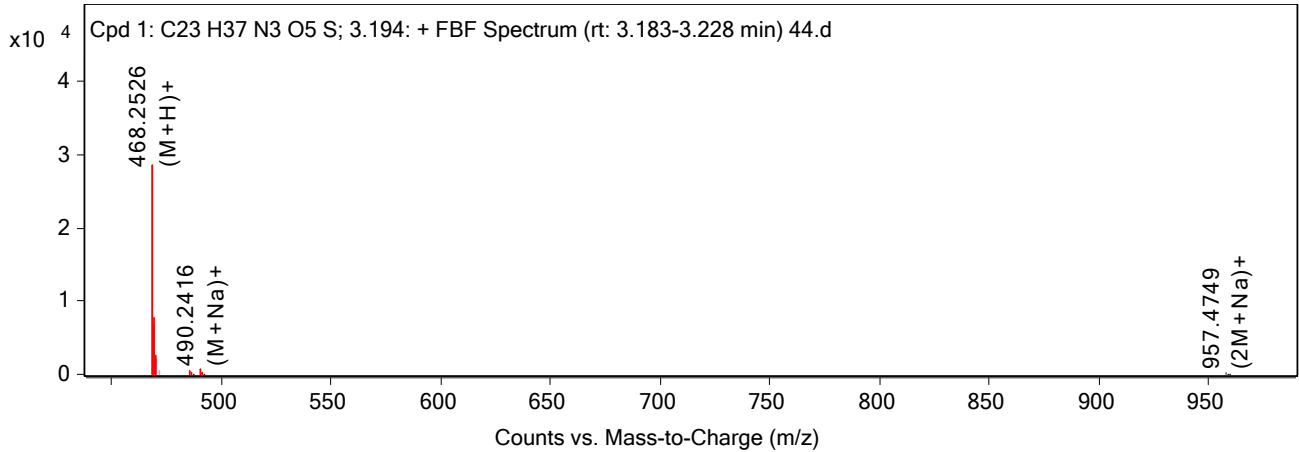

## MS Spectrum Peak List

| Obs. m/z | Charge | Abund    | Ion/Isotope |
|----------|--------|----------|-------------|
| 468.2526 | 1      | 28551.13 | (M+H)+      |
| 469.2559 | 1      | 6902.61  | (M+H)+      |
| 470.2543 | 1      | 2032.03  | (M+H)+      |
| 485.2911 | 1      | 400.46   | (M+NH4)+    |
| 486.2976 | 1      | 138.08   | (M+NH4)+    |
| 490.2416 | 1      | 617.12   | (M+Na)+     |
| 491.2456 | 1      | 212.52   | (M+Na)+     |
| 957.4749 | 1      | 223.38   | (2M+Na)+    |
| 958.4819 | 1      | 129.79   | (2M+Na)+    |
| 959.4764 | 1      | 88.41    | (2M+Na)+    |

## MS Zoomed Spectrum

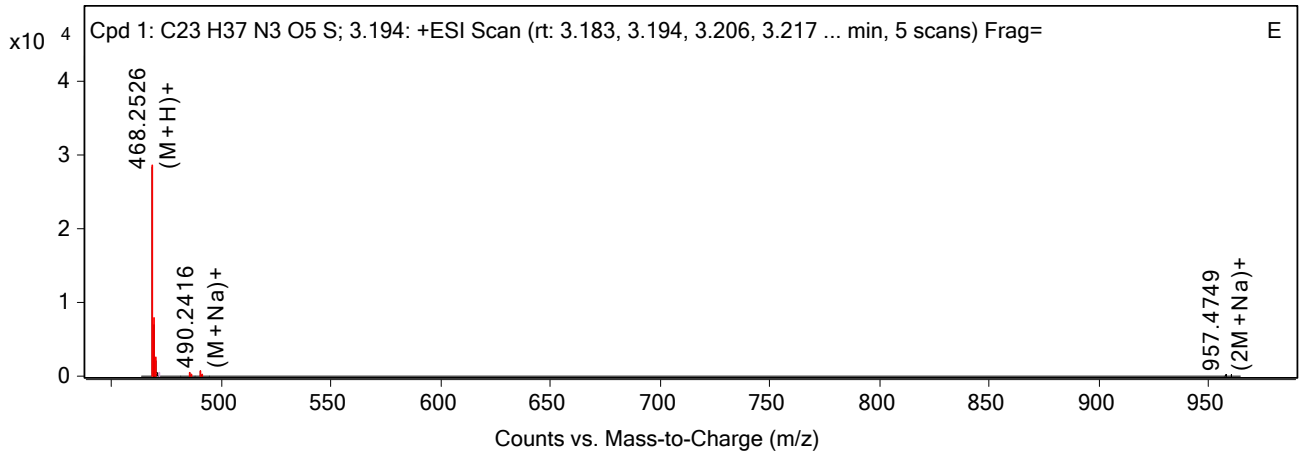

## MS Spectrum Peak List

| Obs. m/z | Charge | Abund    | Ion/Isotope | Tgt Mass Error (ppm) |
|----------|--------|----------|-------------|----------------------|
| 468.2526 | 1      | 28551.13 | (M+H)+      | 0.08                 |
| 469.2559 | 1      | 6902.61  | (M+H)+      | -0.38                |
| 470.2543 | 1      | 2032.03  | (M+H)+      | -1.79                |
| 485.2911 | 1      | 400.46   | (M+NH4)+    | -24.4                |
| 486.2976 | 1      | 138.08   | (M+NH4)+    | -31.8                |
| 490.2416 | 1      | 617.12   | (M+Na)+     | -14.18               |
| 491.2456 | 1      | 212.52   | (M+Na)+     | -16.18               |
| 957.4749 | 1      | 223.38   | (2M+Na)+    | 5.3                  |
| 958.4819 | 1      | 129.79   | (2M+Na)+    | 1.15                 |
| 959.4764 | 1      | 88.41    | (2M+Na)+    | 6.2                  |

--- End Of Report ---

# Target Compound Screening Report

|                                 |                                        |                               |                                                     |
|---------------------------------|----------------------------------------|-------------------------------|-----------------------------------------------------|
| <b>Data File</b>                | 4d.d                                   | <b>Sample Name</b>            | H3472162                                            |
| <b>Sample Type</b>              | Sample                                 | <b>Position</b>               | P1-C4                                               |
| <b>Instrument Name</b>          | Instrument 1                           | <b>User Name</b>              | Denis V.Bylina                                      |
| <b>Acq Method</b>               | Fast_Gradient_HRMS_pos_Lock_08272019.m | <b>Acquired Time</b>          | 10/7/2021 9:30:08 AM (UTC+03:00)                    |
| <b>IRM Calibration Status</b>   | Success                                | <b>DA Method</b>              | 1.m                                                 |
| <b>Comment</b>                  |                                        |                               |                                                     |
| <b>Sample Group</b>             |                                        | <b>Info.</b>                  | Agilent 6224 TOF LC/MS                              |
| <b>MFC</b>                      | C23H37N3O5S2                           | <b>Stream Name</b>            | LC 1                                                |
| <b>Acquisition Time (Local)</b> | 10/7/2021 9:30:08 AM (UTC+03:00)       | <b>Acquisition SW Version</b> | 6200 series TOF/6500 series Q-TOF B.08.00 (B8058.0) |
| <b>TOF Driver Version</b>       | 8.00.00                                | <b>TOF Firmware Version</b>   | 8.643                                               |
| <b>Tune Mass Range Max.</b>     | 1700                                   |                               |                                                     |

## Compound Table

| Label                          | Tgt Score | Mass Error (ppm) | Tgt Formula      | Obs. RT | Ref. Mass | Obs. Mass |
|--------------------------------|-----------|------------------|------------------|---------|-----------|-----------|
| Cpd 1: C23 H37 N3 O5 S2; 3.494 | 94.5      | -1.65            | C23 H37 N3 O5 S2 | 3.494   | 499.2175  | 499.2166  |

| Obs. m/z | Obs. RT | Obs. Mass | Tgt Formula      | Tgt Mass | Tgt Mass Error (ppm) | RT Diff.        | Find Cpd Algorithm |
|----------|---------|-----------|------------------|----------|----------------------|-----------------|--------------------|
| 500.2239 | 3.494   | 499.2166  | C23 H37 N3 O5 S2 | 499.2175 | -1.65                | Find By Formula |                    |

## Compound Chromatograms

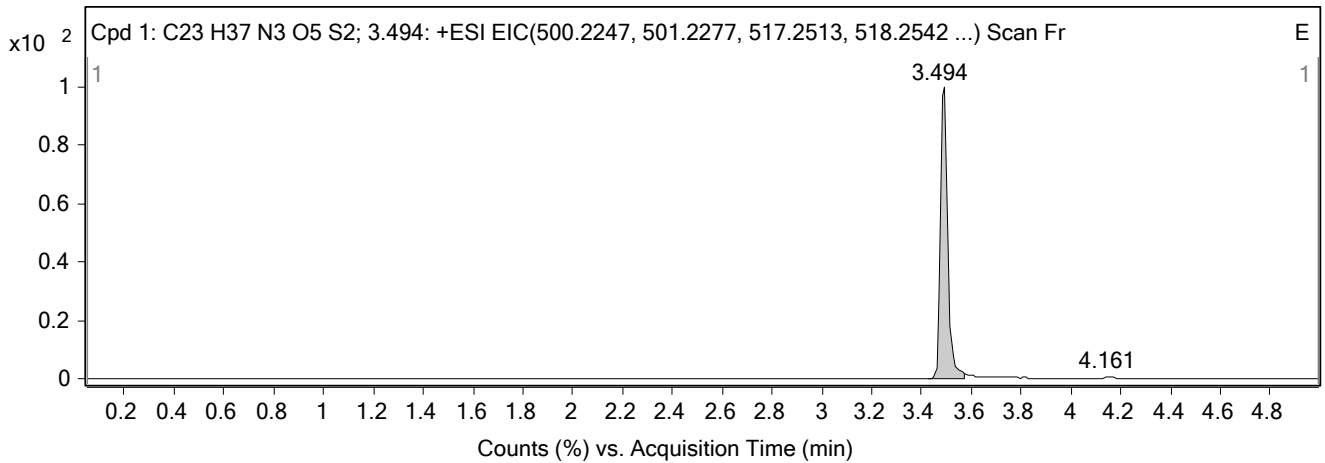

MS Zoomed Spectrum

# Target Compound Screening Report

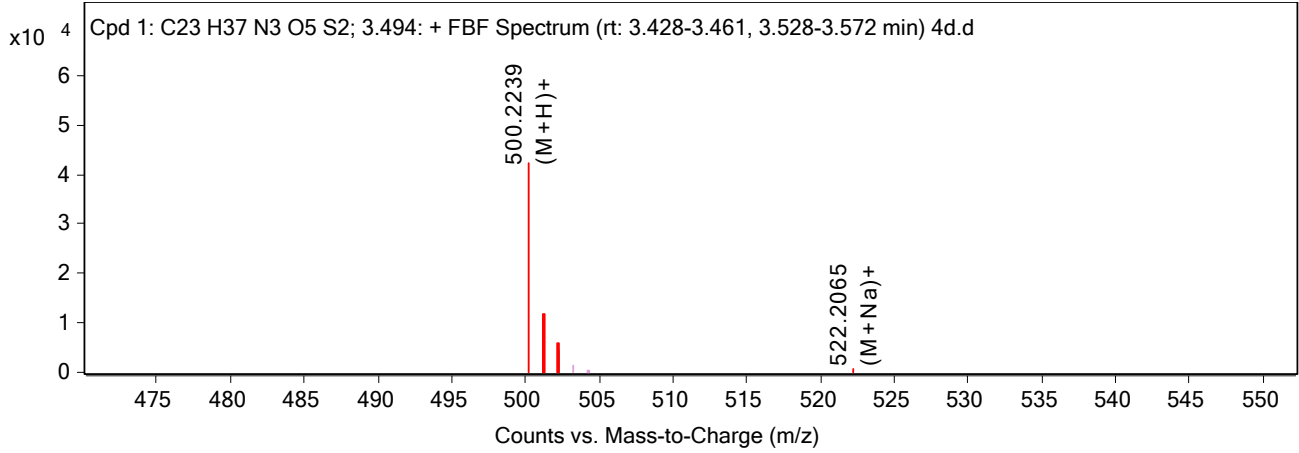

## MS Spectrum Peak List

| Obs. m/z | Charge | Abund    | Ion/Isotope |
|----------|--------|----------|-------------|
| 500.2239 | 1      | 42343.1  | (M+H)+      |
| 501.2267 | 1      | 10346.71 | (M+H)+      |
| 502.2234 | 1      | 4595.75  | (M+H)+      |
| 522.2065 | 1      | 534.55   | (M+Na)+     |

## MS Zoomed Spectrum

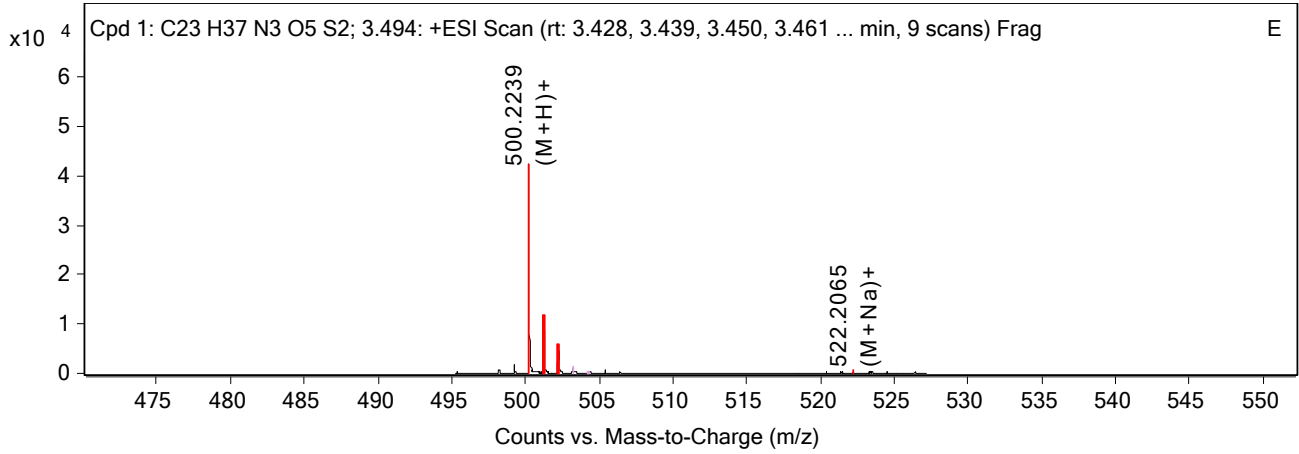

## MS Spectrum Peak List

| Obs. m/z | Charge | Abund    | Ion/Isotope | Tgt Mass Error (ppm) |
|----------|--------|----------|-------------|----------------------|
| 500.2239 | 1      | 42343.1  | (M+H)+      | 1.64                 |
| 500.2239 | 1      | 42343.1  | (M+H)+      |                      |
| 501.2267 | 1      | 10346.71 | (M+H)+      | 1.99                 |
| 502.2234 | 1      | 4595.75  | (M+H)+      | 1.13                 |
| 522.2065 | 1      | 534.55   | (M+Na)+     | 0.38                 |

--- End Of Report ---

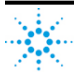

# Target Compound Screening Report

|                                 |                                        |                               |                                                     |
|---------------------------------|----------------------------------------|-------------------------------|-----------------------------------------------------|
| <b>Data File</b>                | 46.d                                   | <b>Sample Name</b>            | H2978088                                            |
| <b>Sample Type</b>              | Sample                                 | <b>Position</b>               | P1-F1                                               |
| <b>Instrument Name</b>          | Instrument 1                           | <b>User Name</b>              | Denis V.Bylina                                      |
| <b>Acq Method</b>               | Fast_Gradient_HRMS_pos_Lock_08272019.m | <b>Acquired Time</b>          | 9/22/2021 5:57:54 PM (UTC+03:00)                    |
| <b>IRM Calibration Status</b>   | Success                                | <b>DA Method</b>              | 1.m                                                 |
| <b>Comment</b>                  |                                        |                               |                                                     |
| <b>Sample Group</b>             |                                        | <b>Info.</b>                  | Agilent 6224 TOF LC/MS                              |
| <b>MFC</b>                      | C23H35N3O6S                            | <b>Stream Name</b>            | LC 1                                                |
| <b>Acquisition Time (Local)</b> | 9/22/2021 5:57:54 PM (UTC+03:00)       | <b>Acquisition SW Version</b> | 6200 series TOF/6500 series Q-TOF B.08.00 (B8058.0) |
| <b>TOF Driver Version</b>       | 8.00.00                                | <b>TOF Firmware Version</b>   | 8.643                                               |
| <b>Tune Mass Range Max.</b>     | 1700                                   |                               |                                                     |

## Compound Table

| Label                         | Tgt Score | Mass Error (ppm) | Tgt Formula     | Obs. RT | Ref. Mass | Obs. Mass |
|-------------------------------|-----------|------------------|-----------------|---------|-----------|-----------|
| Cpd 1: C23 H35 N3 O6 S; 3.220 | 95.84     | -0.99            | C23 H35 N3 O6 S | 3.22    | 481.2247  | 481.2242  |

| Obs. m/z | Obs. RT | Obs. Mass | Tgt Formula     | Tgt Mass | Tgt Mass Error (ppm) | RT Diff.        | Find Cpds Algorithm |
|----------|---------|-----------|-----------------|----------|----------------------|-----------------|---------------------|
| 482.2316 | 3.22    | 481.2242  | C23 H35 N3 O6 S | 481.2247 | -0.99                | Find By Formula |                     |

## Compound Chromatograms

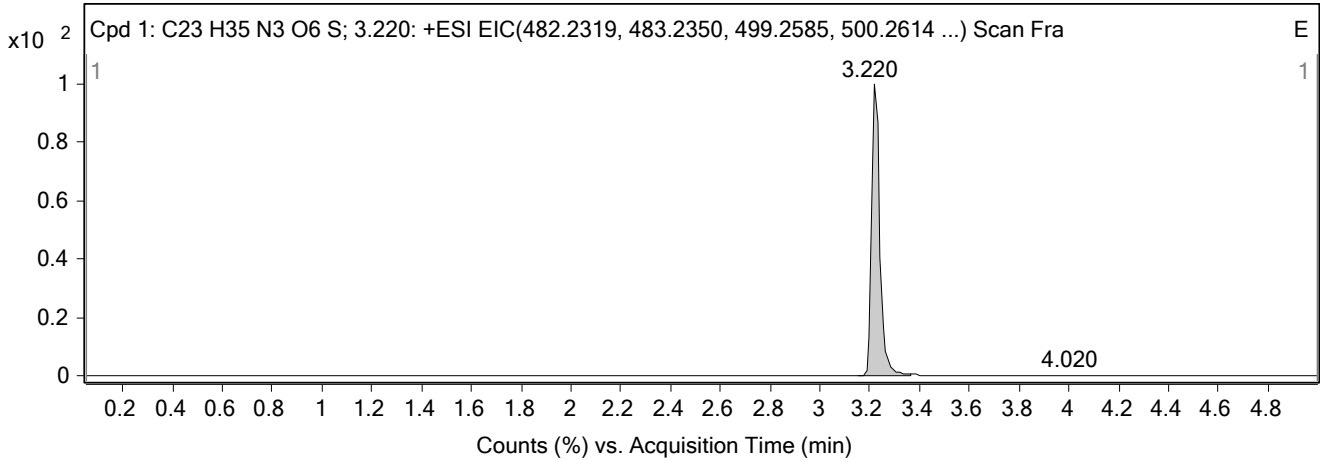

MS Zoomed Spectrum

# Target Compound Screening Report

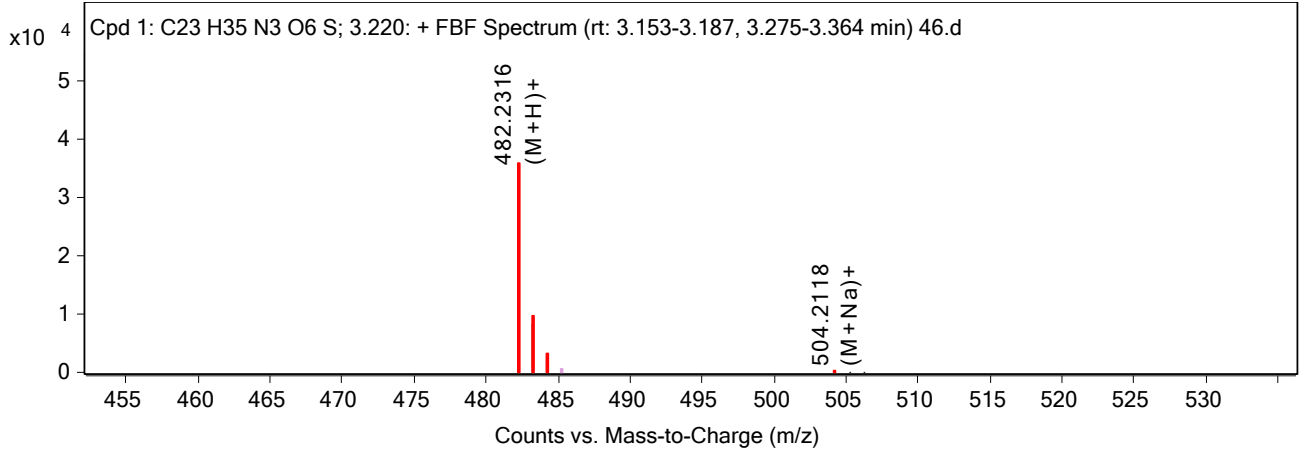

## MS Spectrum Peak List

| Obs. m/z | Charge | Abund    | Ion/Isotope |
|----------|--------|----------|-------------|
| 482.2316 | 1      | 35857.57 | (M+H)+      |
| 483.2341 | 1      | 8224.68  | (M+H)+      |
| 484.2321 | 1      | 2504.68  | (M+H)+      |
| 504.2118 | 1      | 377.79   | (M+Na)+     |
| 505.2176 | 1      | 111.58   | (M+Na)+     |
| 506.2122 | 1      | 60.43    | (M+Na)+     |

## MS Zoomed Spectrum

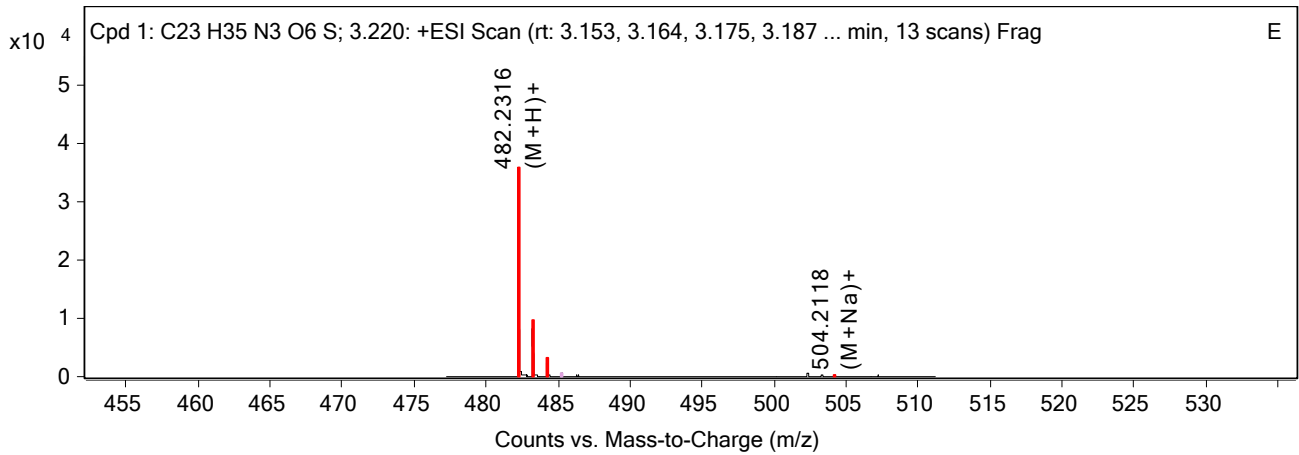

## MS Spectrum Peak List

| Obs. m/z | Charge | Abund    | Ion/Isotope | Tgt Mass Error (ppm) |
|----------|--------|----------|-------------|----------------------|
| 482.2316 | 1      | 35857.57 | (M+H)+      | 0.73                 |
| 483.2341 | 1      | 8224.68  | (M+H)+      | 1.76                 |
| 484.2321 | 1      | 2504.68  | (M+H)+      | 1.55                 |
| 504.2118 | 1      | 377.79   | (M+Na)+     | 4.17                 |
| 505.2176 | 1      | 111.58   | (M+Na)+     | -1.43                |
| 506.2122 | 1      | 60.43    | (M+Na)+     | 5.1                  |

--- End Of Report ---



# Target Compound Screening Report

|                                 |                                        |                               |                                                     |
|---------------------------------|----------------------------------------|-------------------------------|-----------------------------------------------------|
| <b>Data File</b>                | 16.d                                   | <b>Sample Name</b>            | H2982867                                            |
| <b>Sample Type</b>              | Sample                                 | <b>Position</b>               | P1-B7                                               |
| <b>Instrument Name</b>          | Instrument 1                           | <b>User Name</b>              | Denis V.Bylina                                      |
| <b>Acq Method</b>               | Fast_Gradient_HRMS_pos_Lock_08272019.m | <b>Acquired Time</b>          | 9/23/2021 8:17:01 PM (UTC+03:00)                    |
| <b>IRM Calibration Status</b>   | Success                                | <b>DA Method</b>              | 1.m                                                 |
| <b>Comment</b>                  |                                        |                               |                                                     |
| <b>Sample Group</b>             |                                        | <b>Info.</b>                  | Agilent 6224 TOF LC/MS                              |
| <b>MFC</b>                      | C25H29N5O2                             | <b>Stream Name</b>            | LC 1                                                |
| <b>Acquisition Time (Local)</b> | 9/23/2021 8:17:01 PM (UTC+03:00)       | <b>Acquisition SW Version</b> | 6200 series TOF/6500 series Q-TOF B.08.00 (B8058.0) |
| <b>TOF Driver Version</b>       | 8.00.00                                | <b>TOF Firmware Version</b>   | 8.643                                               |
| <b>Tune Mass Range Max.</b>     | 1700                                   |                               |                                                     |

## Compound Table

| Label                       | Tgt Score | Mass Error (ppm) | Tgt Formula   | Obs. RT | Ref. Mass | Obs. Mass |
|-----------------------------|-----------|------------------|---------------|---------|-----------|-----------|
| Cpd 1: C25 H29 N5 O2; 2.262 | 98.06     | -1.19            | C25 H29 N5 O2 | 2.262   | 431.2321  | 431.2316  |

| Obs. m/z | Obs. RT | Obs. Mass | Tgt Formula   | Tgt Mass | Tgt Mass Error (ppm) | RT Diff.        | Find Cps Algorithm |
|----------|---------|-----------|---------------|----------|----------------------|-----------------|--------------------|
| 432.239  | 2.262   | 431.2316  | C25 H29 N5 O2 | 431.2321 | -1.19                | Find By Formula |                    |

## Compound Chromatograms

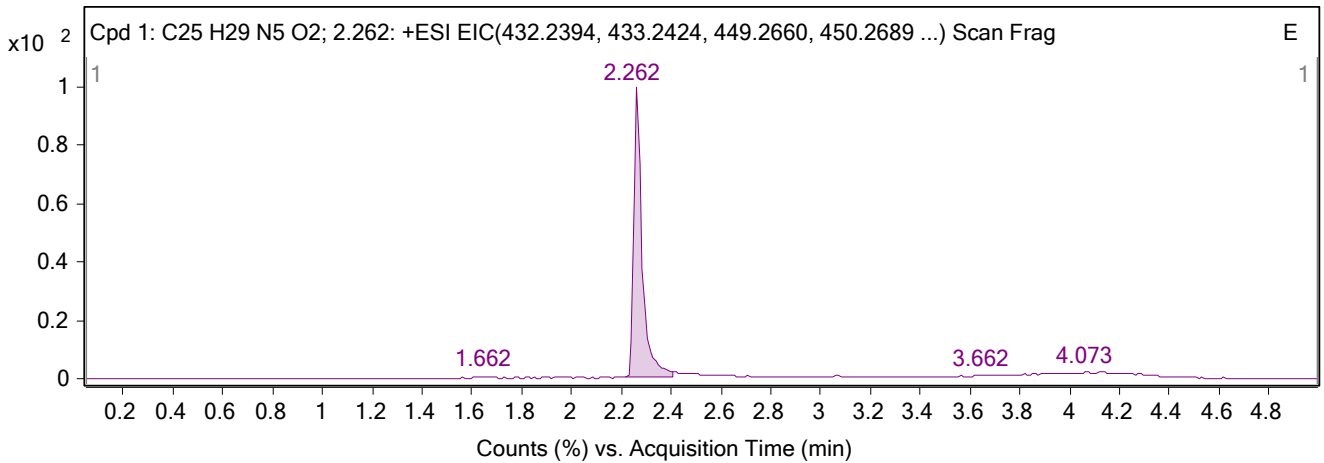

MS Zoomed Spectrum

# Target Compound Screening Report

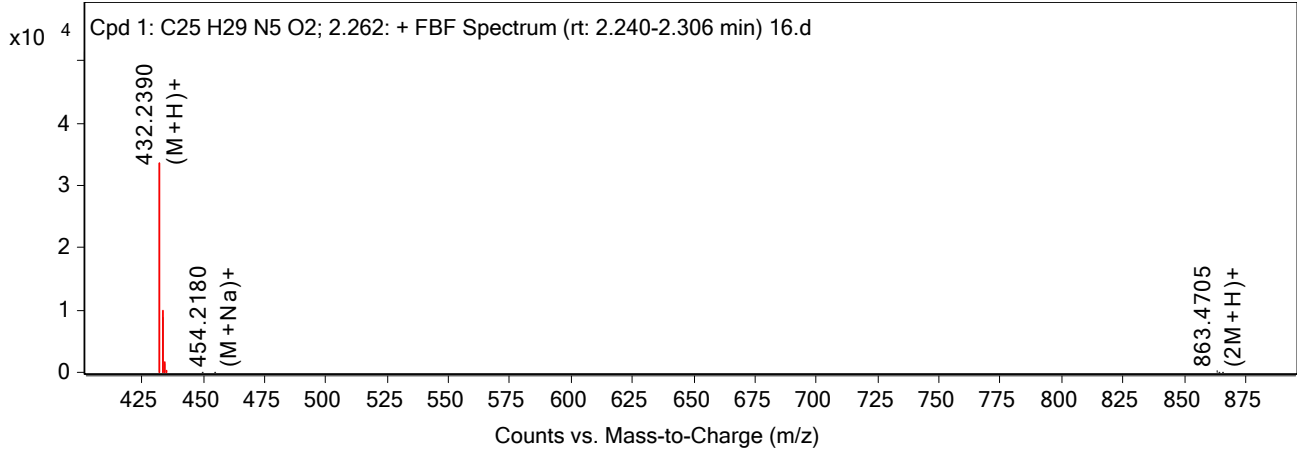

### MS Spectrum Peak List

| Obs. m/z | Charge | Abund    | Ion/Isotope |
|----------|--------|----------|-------------|
| 432.239  | 1      | 33493.14 | (M+H)+      |
| 433.2416 | 1      | 8780.1   | (M+H)+      |
| 434.2443 | 1      | 1325.06  | (M+H)+      |
| 435.243  | 1      | 164.88   | (M+H)+      |
| 449.2789 | 1      | 51.55    | (M+NH4)+    |
| 454.218  | 1      | 73.46    | (M+Na)+     |
| 863.4705 | 1      | 168.2    | (2M+H)+     |
| 864.4691 | 1      | 111.16   | (2M+H)+     |
| 865.4632 | 1      | 41.85    | (2M+H)+     |

### MS Zoomed Spectrum

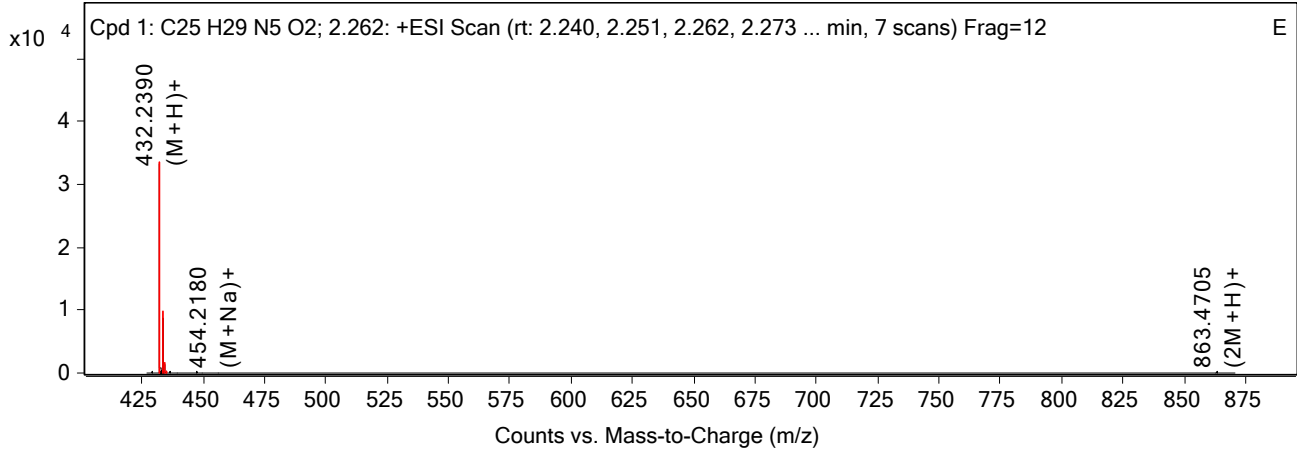

### MS Spectrum Peak List

| Obs. m/z | Charge | Abund    | Ion/Isotope | Tgt Mass Error (ppm) |
|----------|--------|----------|-------------|----------------------|
| 432.239  | 1      | 33493.14 | (M+H)+      | 0.88                 |
| 433.2416 | 1      | 8780.1   | (M+H)+      | 1.85                 |
| 434.2443 | 1      | 1325.06  | (M+H)+      | 2.2                  |
| 435.243  | 1      | 164.88   | (M+H)+      | 11.26                |
| 449.2789 | 1      | 51.55    | (M+NH4)+    | -28.89               |
| 454.218  | 1      | 73.46    | (M+Na)+     | 7.35                 |
| 863.4705 | 1      | 168.2    | (2M+H)+     | 1.23                 |
| 864.4691 | 1      | 111.16   | (2M+H)+     | 6.26                 |
| 865.4632 | 1      | 41.85    | (2M+H)+     | 16.43                |

--- End Of Report ---

# Target Compound Screening Report

|                                 |                                        |                               |                                                     |
|---------------------------------|----------------------------------------|-------------------------------|-----------------------------------------------------|
| <b>Data File</b>                | 32.d                                   | <b>Sample Name</b>            | H2989503                                            |
| <b>Sample Type</b>              | Sample                                 | <b>Position</b>               | P1-D5                                               |
| <b>Instrument Name</b>          | Instrument 1                           | <b>User Name</b>              | Denis V.Bylina                                      |
| <b>Acq Method</b>               | Fast_Gradient_HRMS_pos_Lock_08272019.m | <b>Acquired Time</b>          | 9/23/2021 2:08:49 PM (UTC+03:00)                    |
| <b>IRM Calibration Status</b>   | Success                                | <b>DA Method</b>              | 1.m                                                 |
| <b>Comment</b>                  |                                        |                               |                                                     |
| <b>Sample Group</b>             |                                        | <b>Info.</b>                  | Agilent 6224 TOF LC/MS                              |
| <b>MFC</b>                      | C26H29FN4O2                            | <b>Stream Name</b>            | LC 1                                                |
| <b>Acquisition Time (Local)</b> | 9/23/2021 2:08:49 PM (UTC+03:00)       | <b>Acquisition SW Version</b> | 6200 series TOF/6500 series Q-TOF B.08.00 (B8058.0) |
| <b>TOF Driver Version</b>       | 8.00.00                                | <b>TOF Firmware Version</b>   | 8.643                                               |
| <b>Tune Mass Range Max.</b>     | 1700                                   |                               |                                                     |

## Compound Table

| Label                         | Tgt Score | Mass Error (ppm) | Tgt Formula     | Obs. RT | Ref. Mass | Obs. Mass |
|-------------------------------|-----------|------------------|-----------------|---------|-----------|-----------|
| Cpd 1: C26 H29 F N4 O2; 3.209 | 95.72     | 0.17             | C26 H29 F N4 O2 | 3.209   | 448.2275  | 448.2275  |

| Obs. m/z | Obs. RT | Obs. Mass | Tgt Formula     | Tgt Mass | Tgt Mass Error (ppm) | RT Diff.        | Find Cpds Algorithm |
|----------|---------|-----------|-----------------|----------|----------------------|-----------------|---------------------|
| 449.2347 | 3.209   | 448.2275  | C26 H29 F N4 O2 | 448.2275 | 0.17                 | Find By Formula |                     |

## Compound Chromatograms

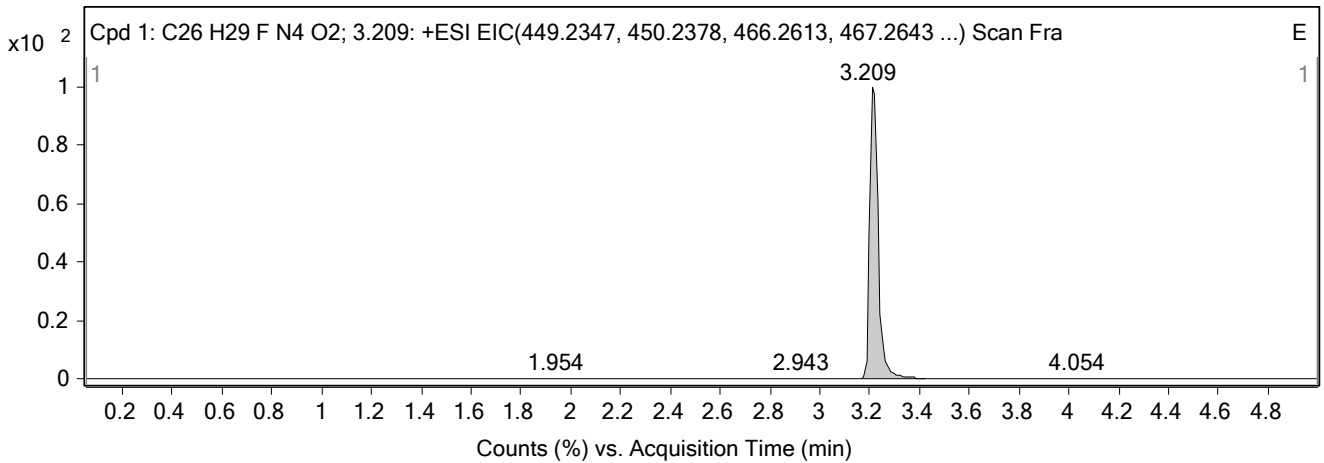

MS Zoomed Spectrum

# Target Compound Screening Report

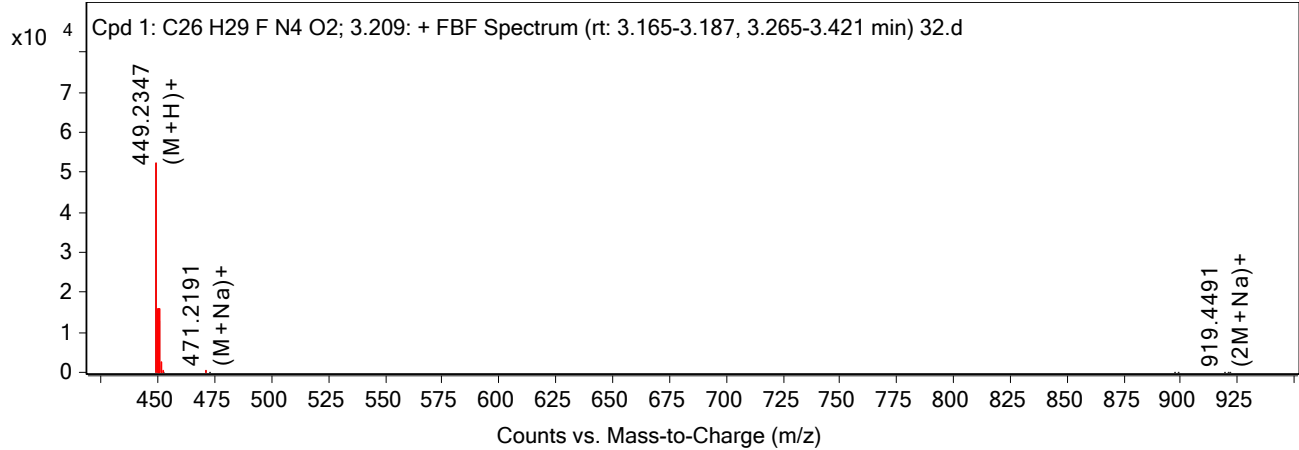

### MS Spectrum Peak List

| Obs. m/z | Charge | Abund    | Ion/Isotope |
|----------|--------|----------|-------------|
| 449.2347 | 1      | 52173.42 | (M+H)+      |
| 450.238  | 1      | 12927.57 | (M+H)+      |
| 451.2407 | 1      | 1914.88  | (M+H)+      |
| 452.2447 | 1      | 215.11   | (M+H)+      |
| 471.2191 | 1      | 557.43   | (M+Na)+     |
| 472.2188 | 1      | 191.02   | (M+Na)+     |
| 897.4686 | 1      | 58.16    | (2M+H)+     |
| 919.4491 | 1      | 114.36   | (2M+Na)+    |
| 920.4449 | 1      | 70.03    | (2M+Na)+    |
| 921.4706 | 1      | 45.97    | (2M+Na)+    |

### MS Zoomed Spectrum

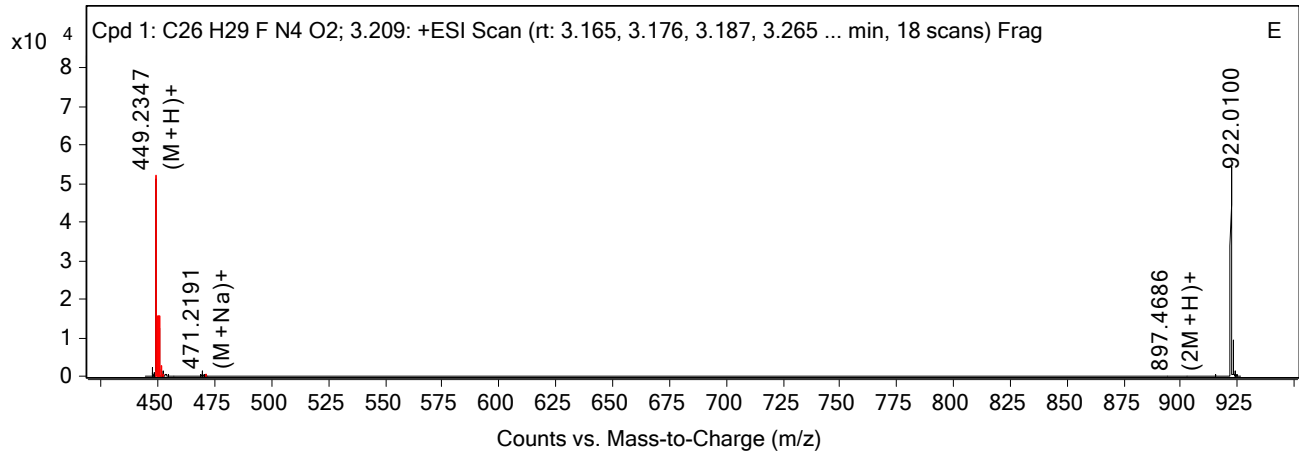

### MS Spectrum Peak List

| Obs. m/z | Charge | Abund    | Ion/Isotope | Tgt Mass Error (ppm) |
|----------|--------|----------|-------------|----------------------|
| 449.2347 | 1      | 52173.42 | (M+H)+      | 0.01                 |
| 450.238  | 1      | 12927.57 | (M+H)+      | -0.36                |
| 451.2407 | 1      | 1914.88  | (M+H)+      | -0.02                |
| 452.2447 | 1      | 215.11   | (M+H)+      | -2.61                |
| 471.2191 | 1      | 557.43   | (M+Na)+     | -5.16                |
| 472.2188 | 1      | 191.02   | (M+Na)+     | 1.98                 |
| 897.4686 | 1      | 58.16    | (2M+H)+     | -7.1                 |
| 919.4491 | 1      | 114.36   | (2M+Na)+    | -5.38                |
| 920.4449 | 1      | 70.03    | (2M+Na)+    | 2.5                  |
| 921.4706 | 1      | 45.97    | (2M+Na)+    | -22.18               |

--- End Of Report ---

# Target Compound Screening Report

|                                 |                                        |                               |                                                     |
|---------------------------------|----------------------------------------|-------------------------------|-----------------------------------------------------|
| <b>Data File</b>                | 17.d                                   | <b>Sample Name</b>            | H2993387                                            |
| <b>Sample Type</b>              | Sample                                 | <b>Position</b>               | P1-B8                                               |
| <b>Instrument Name</b>          | Instrument 1                           | <b>User Name</b>              | Denis V.Bylina                                      |
| <b>Acq Method</b>               | Fast_Gradient_HRMS_pos_Lock_08272019.m | <b>Acquired Time</b>          | 9/23/2021 12:45:27 PM (UTC+03:00)                   |
| <b>IRM Calibration Status</b>   | Success                                | <b>DA Method</b>              | 1.m                                                 |
| <b>Comment</b>                  |                                        | <b>Info.</b>                  | Agilent 6224 TOF LC/MS                              |
| <b>Sample Group</b>             |                                        | <b>Stream Name</b>            | LC 1                                                |
| <b>MFC</b>                      | C25H27FN4O2                            | <b>Acquisition SW Version</b> | 6200 series TOF/6500 series Q-TOF B.08.00 (B8058.0) |
| <b>Acquisition Time (Local)</b> | 9/23/2021 12:45:27 PM (UTC+03:00)      | <b>TOF Firmware Version</b>   | 8.643                                               |
| <b>TOF Driver Version</b>       | 8.00.00                                |                               |                                                     |
| <b>Tune Mass Range Max.</b>     | 1700                                   |                               |                                                     |

## Compound Table

| Label                         | Tgt Score | Mass Error (ppm) | Tgt Formula     | Obs. RT | Ref. Mass | Obs. Mass |
|-------------------------------|-----------|------------------|-----------------|---------|-----------|-----------|
| Cpd 1: C25 H27 F N4 O2; 3.293 | 95.78     | -0.89            | C25 H27 F N4 O2 | 3.293   | 434.2118  | 434.2114  |

| Obs. m/z | Obs. RT | Obs. Mass | Tgt Formula     | Tgt Mass | Tgt Mass Error (ppm) | RT Diff.        | Find Cpd Algorithm |
|----------|---------|-----------|-----------------|----------|----------------------|-----------------|--------------------|
| 435.2187 | 3.293   | 434.2114  | C25 H27 F N4 O2 | 434.2118 | -0.89                | Find By Formula |                    |

## Compound Chromatograms

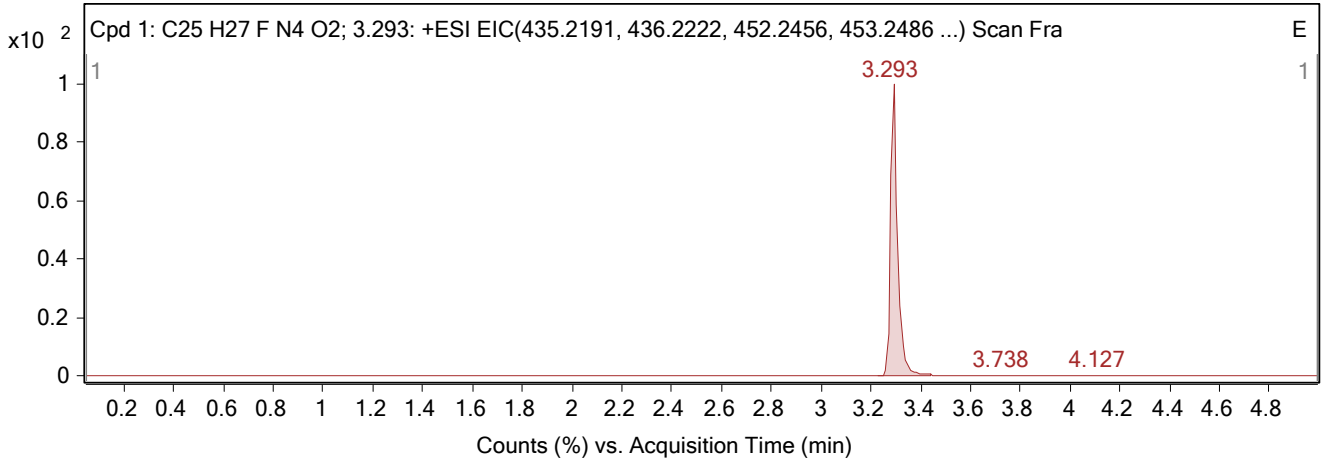

MS Zoomed Spectrum

# Target Compound Screening Report

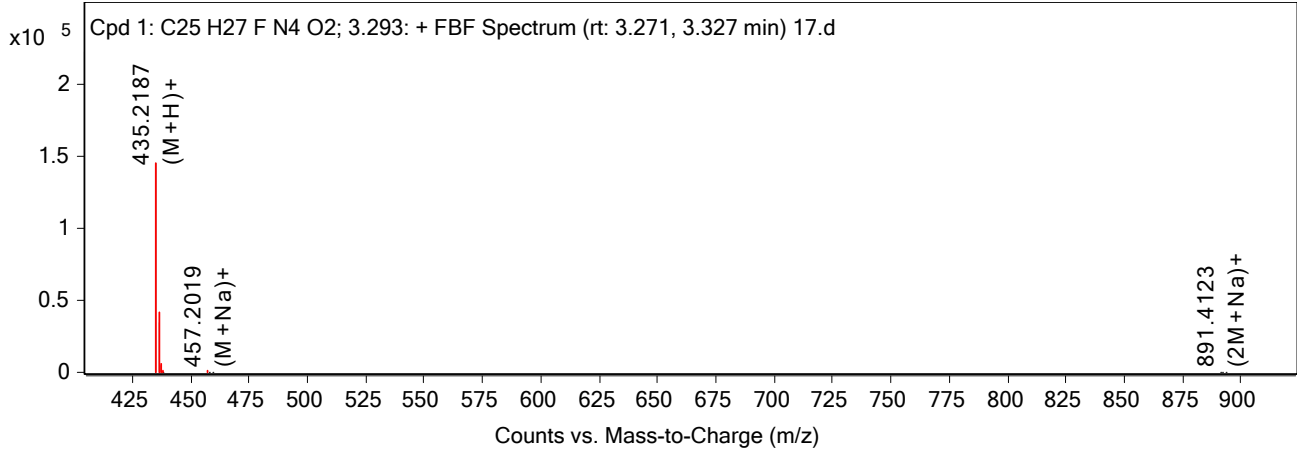

### MS Spectrum Peak List

| Obs. m/z | Charge | Abund     | Ion/Isotope |
|----------|--------|-----------|-------------|
| 435.2187 | 1      | 145181.56 | (M+H)+      |
| 436.2217 | 1      | 34741.37  | (M+H)+      |
| 437.2241 | 1      | 5084.26   | (M+H)+      |
| 438.2291 | 1      | 553.21    | (M+H)+      |
| 457.2019 | 1      | 1024.52   | (M+Na)+     |
| 458.2073 | 1      | 329.13    | (M+Na)+     |
| 459.2    | 1      | 170.66    | (M+Na)+     |
| 891.4123 | 1      | 410.09    | (2M+Na)+    |
| 892.4141 | 1      | 237.74    | (2M+Na)+    |
| 893.4205 | 1      | 89.01     | (2M+Na)+    |

### MS Zoomed Spectrum

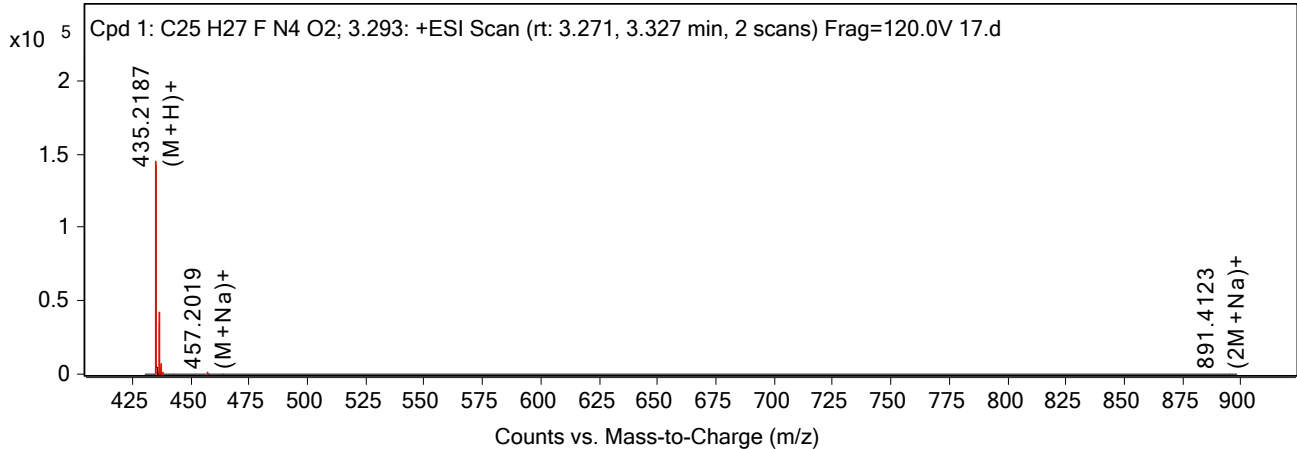

### MS Spectrum Peak List

| Obs. m/z | Charge | Abund     | Ion/Isotope | Tgt Mass Error (ppm) |
|----------|--------|-----------|-------------|----------------------|
| 435.2187 | 1      | 145181.57 | (M+H)+      | 0.85                 |
| 436.2217 | 1      | 34741.37  | (M+H)+      | 0.97                 |
| 437.2241 | 1      | 5084.26   | (M+H)+      | 2.14                 |
| 438.2291 | 1      | 553.21    | (M+H)+      | -3.02                |
| 457.2019 | 1      | 1024.52   | (M+Na)+     | -1.89                |
| 458.2073 | 1      | 329.13    | (M+Na)+     | -6.89                |
| 459.2    | 1      | 170.66    | (M+Na)+     | 15.14                |
| 891.4123 | 1      | 410.09    | (2M+Na)+    | 0.59                 |
| 892.4141 | 1      | 237.74    | (2M+Na)+    | 2.02                 |
| 893.4205 | 1      | 89.01     | (2M+Na)+    | -1.85                |

--- End Of Report ---

# Target Compound Screening Report

|                                 |                                        |                               |                                                     |
|---------------------------------|----------------------------------------|-------------------------------|-----------------------------------------------------|
| <b>Data File</b>                | 53.d                                   | <b>Sample Name</b>            | H2978522                                            |
| <b>Sample Type</b>              | Sample                                 | <b>Position</b>               | P1-F8                                               |
| <b>Instrument Name</b>          | Instrument 1                           | <b>User Name</b>              | Denis V.Bylina                                      |
| <b>Acq Method</b>               | Fast_Gradient_HRMS_pos_Lock_08272019.m | <b>Acquired Time</b>          | 9/22/2021 6:36:48 PM (UTC+03:00)                    |
| <b>IRM Calibration Status</b>   | Success                                | <b>DA Method</b>              | 1.m                                                 |
| <b>Comment</b>                  |                                        |                               |                                                     |
| <b>Sample Group</b>             |                                        | <b>Info.</b>                  | Agilent 6224 TOF LC/MS                              |
| <b>MFC</b>                      | C26H29ClN4O2                           | <b>Stream Name</b>            | LC 1                                                |
| <b>Acquisition Time (Local)</b> | 9/22/2021 6:36:48 PM (UTC+03:00)       | <b>Acquisition SW Version</b> | 6200 series TOF/6500 series Q-TOF B.08.00 (B8058.0) |
| <b>TOF Driver Version</b>       | 8.00.00                                | <b>TOF Firmware Version</b>   | 8.643                                               |
| <b>Tune Mass Range Max.</b>     | 1700                                   |                               |                                                     |

## Compound Table

| Label                          | Tgt Score | Mass Error (ppm) | Tgt Formula      | Obs. RT | Ref. Mass | Obs. Mass |
|--------------------------------|-----------|------------------|------------------|---------|-----------|-----------|
| Cpd 1: C26 H29 Cl N4 O2; 3.345 | 96.17     | -0.59            | C26 H29 Cl N4 O2 | 3.345   | 464.1979  | 464.1976  |

| Obs. m/z | Obs. RT | Obs. Mass | Tgt Formula      | Tgt Mass | Tgt Mass Error (ppm) | RT Diff.        | Find Cpd Algorithm |
|----------|---------|-----------|------------------|----------|----------------------|-----------------|--------------------|
| 465.2049 | 3.345   | 464.1976  | C26 H29 Cl N4 O2 | 464.1979 | -0.59                | Find By Formula |                    |

## Compound Chromatograms

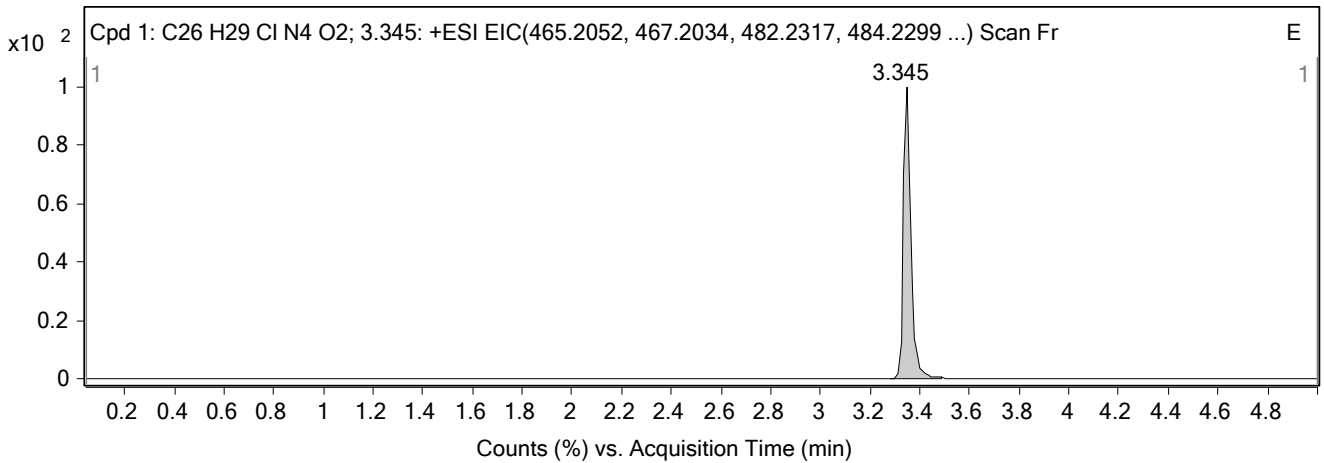

MS Zoomed Spectrum

# Target Compound Screening Report

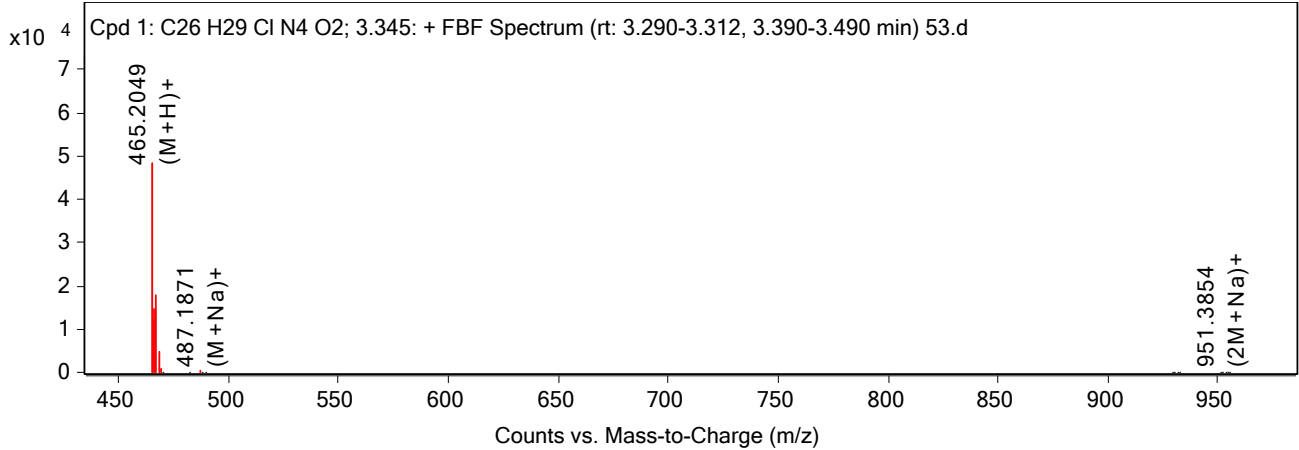

### MS Spectrum Peak List

| Obs. m/z | Charge | Abund    | Ion/Isotope           |
|----------|--------|----------|-----------------------|
| 465.2049 | 1      | 48285.03 | (M+H)+                |
| 466.2079 | 1      | 12146.15 | (M+H)+                |
| 467.2032 | 1      | 14817.45 | (M+H)+                |
| 468.2056 | 1      | 3632.82  | (M+H)+                |
| 469.2065 | 1      | 821.98   | (M+H)+                |
| 470.2117 | 1      | 147.86   | (M+H)+                |
| 482.2333 | 1      | 186.77   | (M+NH <sub>4</sub> )+ |
| 487.1871 | 1      | 393.65   | (M+Na)+               |
| 488.1882 | 1      | 146.62   | (M+Na)+               |
| 489.1835 | 1      | 137.55   | (M+Na)+               |

### MS Zoomed Spectrum

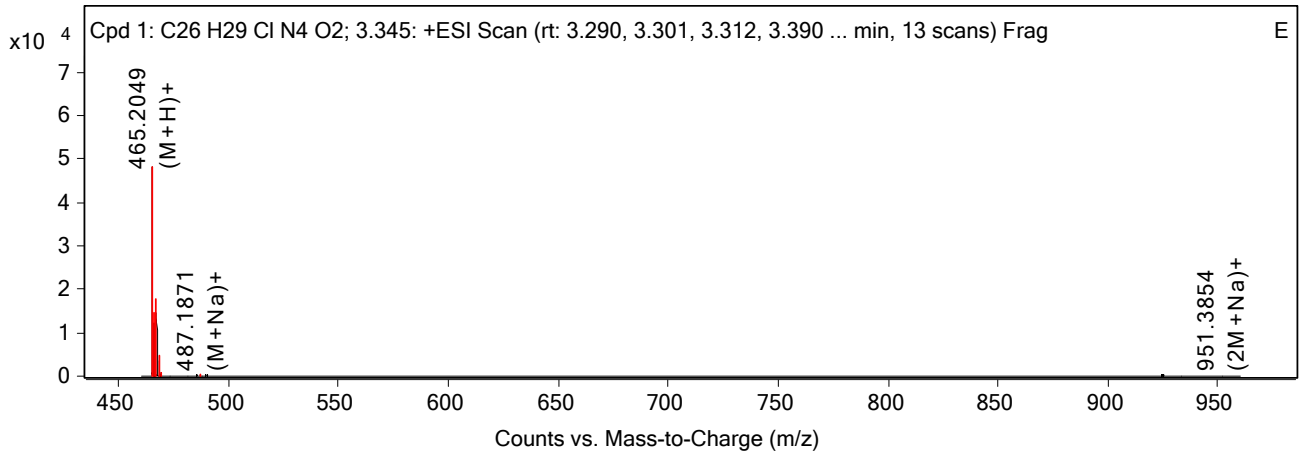

### MS Spectrum Peak List

| Obs. m/z | Charge | Abund    | Ion/Isotope           | Tgt Mass Error (ppm) |
|----------|--------|----------|-----------------------|----------------------|
| 465.2049 | 1      | 48285.03 | (M+H)+                | 0.65                 |
| 466.2079 | 1      | 12146.15 | (M+H)+                | 0.84                 |
| 467.2032 | 1      | 14817.45 | (M+H)+                | 0.32                 |
| 468.2056 | 1      | 3632.82  | (M+H)+                | 0.44                 |
| 469.2065 | 1      | 821.98   | (M+H)+                | 4.11                 |
| 470.2117 | 1      | 147.86   | (M+H)+                | -1.13                |
| 482.2333 | 1      | 186.77   | (M+NH <sub>4</sub> )+ | -3.2                 |
| 487.1871 | 1      | 393.65   | (M+Na)+               | -0.05                |
| 488.1882 | 1      | 146.62   | (M+Na)+               | 4.12                 |
| 489.1835 | 1      | 137.55   | (M+Na)+               | 3.75                 |

--- End Of Report ---



# Target Compound Screening Report

|                                 |                                        |                               |                                                     |
|---------------------------------|----------------------------------------|-------------------------------|-----------------------------------------------------|
| <b>Data File</b>                | 36-2.d                                 | <b>Sample Name</b>            | H2977891                                            |
| <b>Sample Type</b>              | Sample                                 | <b>Position</b>               | P1-D9                                               |
| <b>Instrument Name</b>          | Instrument 1                           | <b>User Name</b>              | Denis V.Bylina                                      |
| <b>Acq Method</b>               | Fast_Gradient_HRMS_pos_Lock_08272019.m | <b>Acquired Time</b>          | 9/22/2021 7:00:54 PM (UTC+03:00)                    |
| <b>IRM Calibration Status</b>   | Success                                | <b>DA Method</b>              | 1.m                                                 |
| <b>Comment</b>                  |                                        |                               |                                                     |
| <b>Sample Group</b>             |                                        | <b>Info.</b>                  | Agilent 6224 TOF LC/MS                              |
| <b>MFC</b>                      | C24H24ClFN4O2                          | <b>Stream Name</b>            | LC 1                                                |
| <b>Acquisition Time (Local)</b> | 9/22/2021 7:00:54 PM (UTC+03:00)       | <b>Acquisition SW Version</b> | 6200 series TOF/6500 series Q-TOF B.08.00 (B8058.0) |
| <b>TOF Driver Version</b>       | 8.00.00                                | <b>TOF Firmware Version</b>   | 8.643                                               |
| <b>Tune Mass Range Max.</b>     | 1700                                   |                               |                                                     |

## Compound Table

| Label                               | Tgt Score | Mass Error (ppm) | Tgt Formula        | Obs. RT | Ref. Mass | Obs. Mass |
|-------------------------------------|-----------|------------------|--------------------|---------|-----------|-----------|
| Cpd 1: C24 H24 Cl F N4 O2;<br>3.337 | 99.03     | -0.49            | C24 H24 Cl F N4 O2 | 3.337   | 454.1572  | 454.157   |

| Obs. m/z | Obs. RT | Obs. Mass | Tgt Formula        | Tgt Mass | Tgt Mass Error (ppm) | RT Diff.        | Find Cpd Algorithm |
|----------|---------|-----------|--------------------|----------|----------------------|-----------------|--------------------|
| 455.1641 | 3.337   | 454.157   | C24 H24 Cl F N4 O2 | 454.1572 | -0.49                | Find By Formula |                    |

## Compound Chromatograms

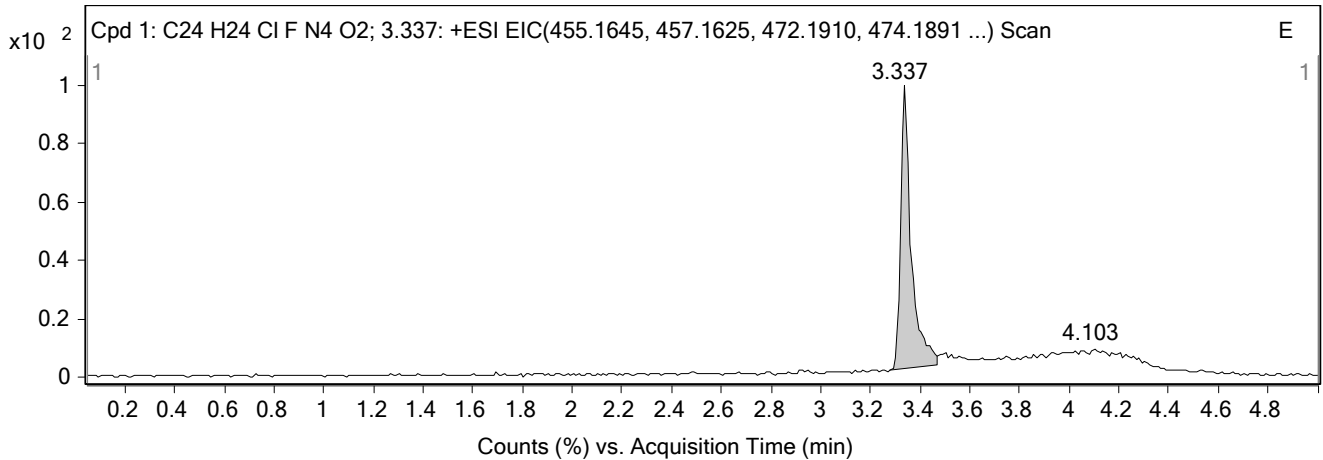

MS Zoomed Spectrum

# Target Compound Screening Report

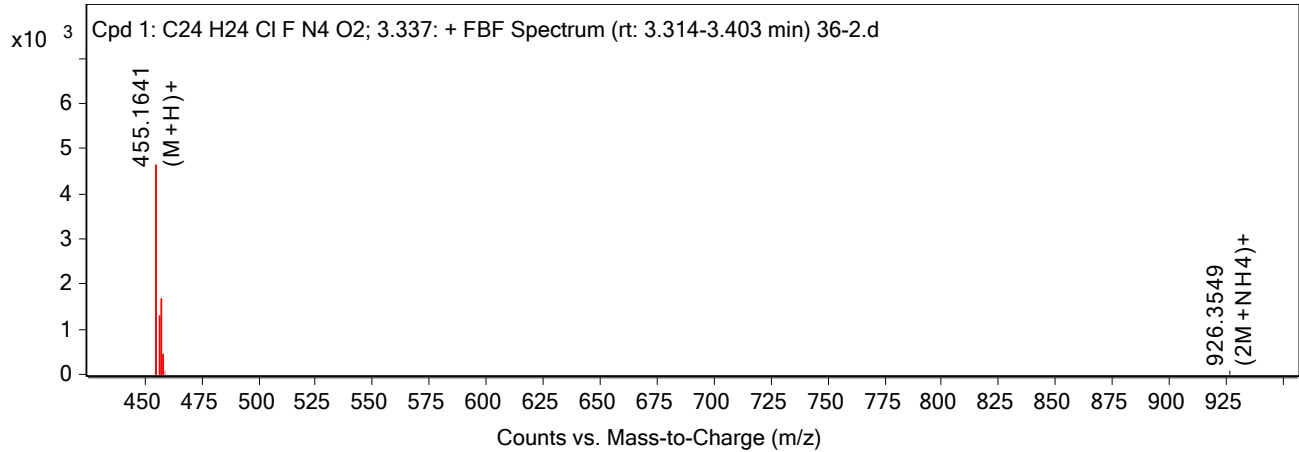

## MS Spectrum Peak List

| Obs. m/z | Charge | Abund   | Ion/Isotope            |
|----------|--------|---------|------------------------|
| 455.1641 | 1      | 4650.45 | (M+H)+                 |
| 456.1671 | 1      | 1298.14 | (M+H)+                 |
| 457.1622 | 1      | 1591.19 | (M+H)+                 |
| 458.1661 | 1      | 476.68  | (M+H)+                 |
| 926.3549 | 1      | 79.96   | (2M+NH <sub>4</sub> )+ |

## MS Zoomed Spectrum

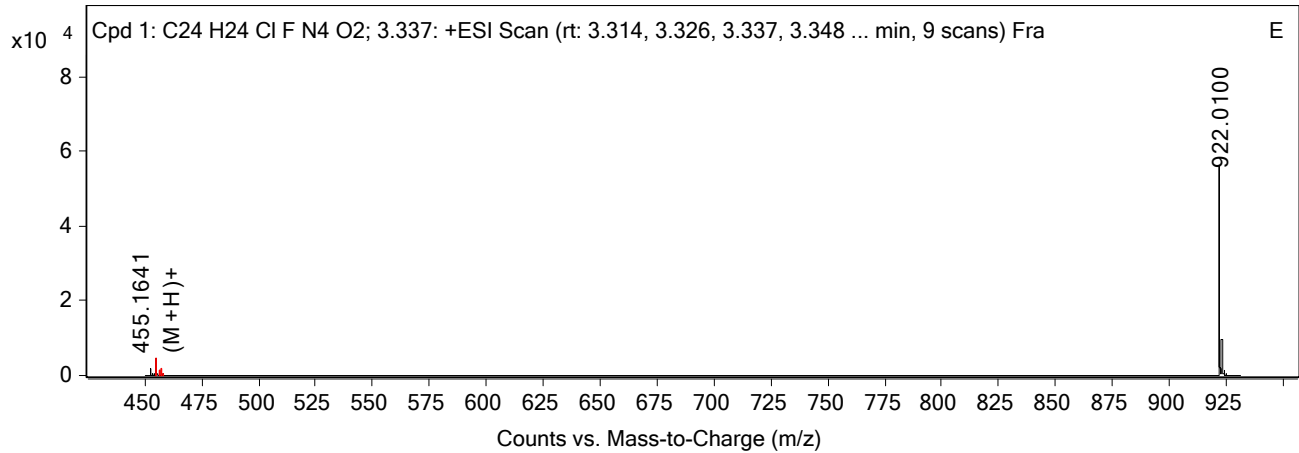

## MS Spectrum Peak List

| Obs. m/z | Charge | Abund    | Ion/Isotope            | Tgt Mass Error (ppm) |
|----------|--------|----------|------------------------|----------------------|
| 455.1641 | 1      | 4650.45  | (M+H)+                 | 0.81                 |
| 456.1671 | 1      | 1298.14  | (M+H)+                 | 0.94                 |
| 457.1622 | 1      | 1591.19  | (M+H)+                 | 0.79                 |
| 458.1661 | 1      | 476.68   | (M+H)+                 | -2.39                |
| 922.01   |        | 55953.79 |                        |                      |
| 926.3549 | 1      | 79.96    | (2M+NH <sub>4</sub> )+ | -7.23                |

--- End Of Report ---

# Target Compound Screening Report

|                                 |                                        |                               |                                                     |
|---------------------------------|----------------------------------------|-------------------------------|-----------------------------------------------------|
| <b>Data File</b>                | 52-3.d                                 | <b>Sample Name</b>            | H2978196                                            |
| <b>Sample Type</b>              | Sample                                 | <b>Position</b>               | P1-F7                                               |
| <b>Instrument Name</b>          | Instrument 1                           | <b>User Name</b>              | Denis V.Bylina                                      |
| <b>Acq Method</b>               | Fast_Gradient_HRMS_pos_Lock_08272019.m | <b>Acquired Time</b>          | 9/22/2021 7:28:57 PM (UTC+03:00)                    |
| <b>IRM Calibration Status</b>   | Success                                | <b>DA Method</b>              | 1.m                                                 |
| <b>Comment</b>                  |                                        |                               |                                                     |
| <b>Sample Group</b>             |                                        | <b>Info.</b>                  | Agilent 6224 TOF LC/MS                              |
| <b>MFC</b>                      | C27H32N4O2                             | <b>Stream Name</b>            | LC 1                                                |
| <b>Acquisition Time (Local)</b> | 9/22/2021 7:28:57 PM (UTC+03:00)       | <b>Acquisition SW Version</b> | 6200 series TOF/6500 series Q-TOF B.08.00 (B8058.0) |
| <b>TOF Driver Version</b>       | 8.00.00                                | <b>TOF Firmware Version</b>   | 8.643                                               |
| <b>Tune Mass Range Max.</b>     | 1700                                   |                               |                                                     |

## Compound Table

| Label                       | Tgt Score | Mass Error (ppm) | Tgt Formula   | Obs. RT | Ref. Mass | Obs. Mass |
|-----------------------------|-----------|------------------|---------------|---------|-----------|-----------|
| Cpd 1: C27 H32 N4 O2; 3.307 | 94.83     | 0.19             | C27 H32 N4 O2 | 3.307   | 444.2525  | 444.2526  |

| Obs. m/z | Obs. RT | Obs. Mass | Tgt Formula   | Tgt Mass | Tgt Mass Error (ppm) | RT Diff.        | Find Cpd Algorithm |
|----------|---------|-----------|---------------|----------|----------------------|-----------------|--------------------|
| 445.2599 | 3.307   | 444.2526  | C27 H32 N4 O2 | 444.2525 | 0.19                 | Find By Formula |                    |

## Compound Chromatograms

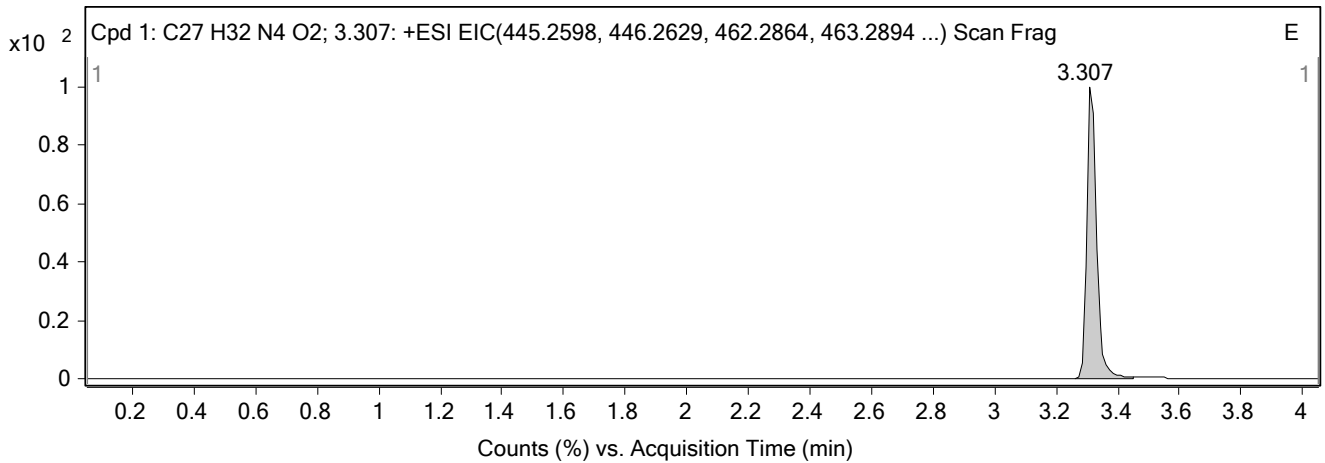

## MS Zoomed Spectrum

# Target Compound Screening Report

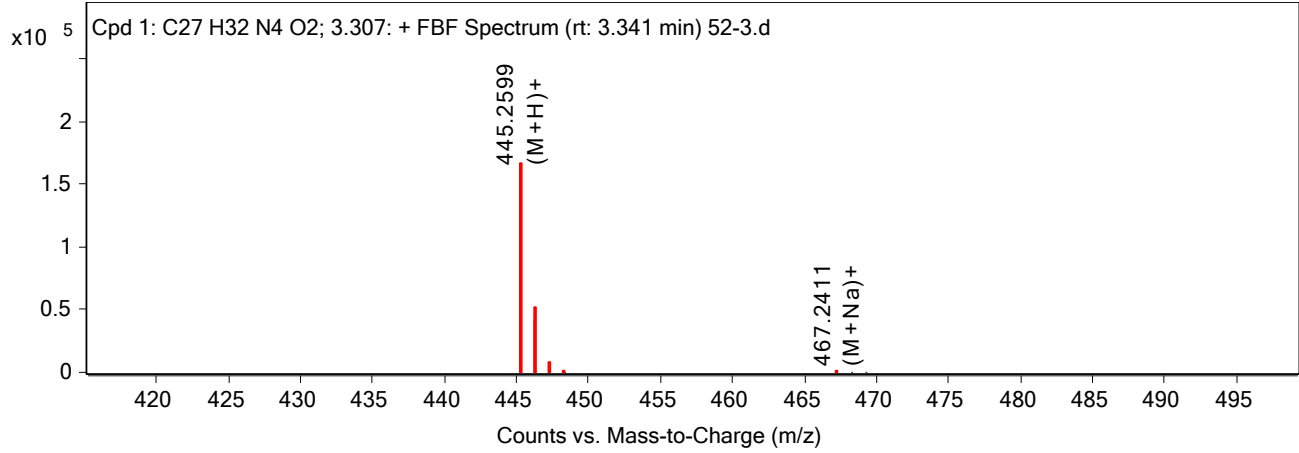

### MS Spectrum Peak List

| Obs. m/z | Charge | Abund     | Ion/Isotope |
|----------|--------|-----------|-------------|
| 445.2599 | 1      | 166385.94 | (M+H)+      |
| 446.2627 | 1      | 42192     | (M+H)+      |
| 447.2671 | 1      | 5743.2    | (M+H)+      |
| 448.2706 | 1      | 661.12    | (M+H)+      |
| 467.2411 | 1      | 1554.64   | (M+Na)+     |
| 468.2461 | 1      | 639       | (M+Na)+     |
| 469.2318 | 1      | 122.98    | (M+Na)+     |

### MS Zoomed Spectrum

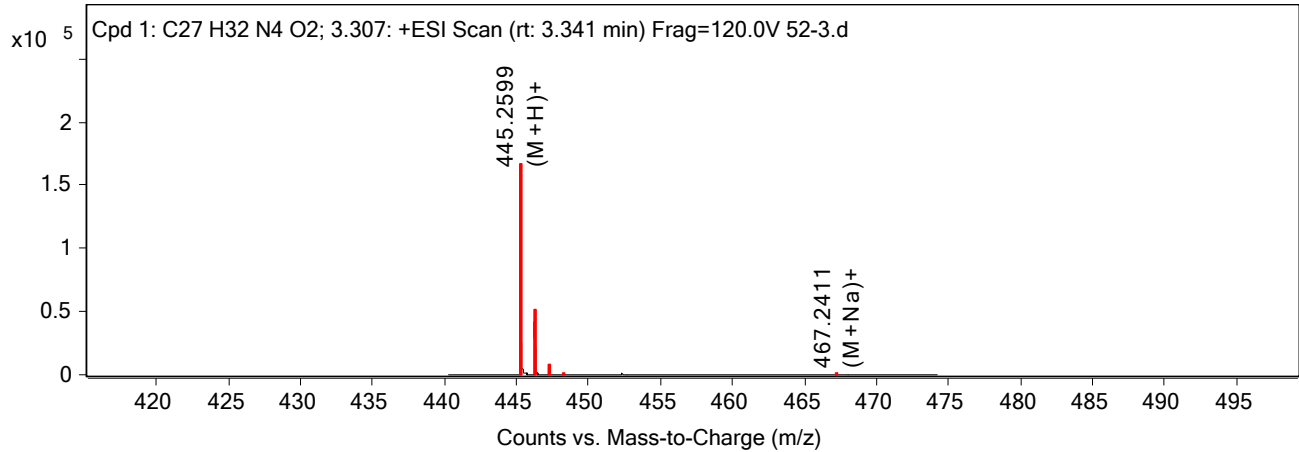

### MS Spectrum Peak List

| Obs. m/z | Charge | Abund     | Ion/Isotope | Tgt Mass Error (ppm) |
|----------|--------|-----------|-------------|----------------------|
| 445.2599 | 1      | 166385.95 | (M+H)+      | -0.25                |
| 445.2599 |        | 166385.95 |             |                      |
| 446.2627 | 1      | 42192     | (M+H)+      | 0.38                 |
| 447.2671 | 1      | 5743.2    | (M+H)+      | -2.95                |
| 448.2706 | 1      | 661.12    | (M+H)+      | -4.28                |
| 467.2411 | 1      | 1554.64   | (M+Na)+     | 1.45                 |
| 468.2461 | 1      | 639       | (M+Na)+     | -2.78                |
| 469.2318 | 1      | 122.98    | (M+Na)+     | 33.97                |

--- End Of Report ---

# Target Compound Screening Report

|                                 |                                        |                               |                                                     |
|---------------------------------|----------------------------------------|-------------------------------|-----------------------------------------------------|
| <b>Data File</b>                | 20.d                                   | <b>Sample Name</b>            | H2998372                                            |
| <b>Sample Type</b>              | Sample                                 | <b>Position</b>               | P1-C2                                               |
| <b>Instrument Name</b>          | Instrument 1                           | <b>User Name</b>              | Denis V.Bylina                                      |
| <b>Acq Method</b>               | Fast_Gradient_HRMS_pos_Lock_08272019.m | <b>Acquired Time</b>          | 9/22/2021 3:33:27 PM (UTC+03:00)                    |
| <b>IRM Calibration Status</b>   | Success                                | <b>DA Method</b>              | 1.m                                                 |
| <b>Comment</b>                  |                                        |                               |                                                     |
| <b>Sample Group</b>             |                                        | <b>Info.</b>                  | Agilent 6224 TOF LC/MS                              |
| <b>MFC</b>                      | C24H26N4O2                             | <b>Stream Name</b>            | LC 1                                                |
| <b>Acquisition Time (Local)</b> | 9/22/2021 3:33:27 PM (UTC+03:00)       | <b>Acquisition SW Version</b> | 6200 series TOF/6500 series Q-TOF B.08.00 (B8058.0) |
| <b>TOF Driver Version</b>       | 8.00.00                                | <b>TOF Firmware Version</b>   | 8.643                                               |
| <b>Tune Mass Range Max.</b>     | 1700                                   |                               |                                                     |

## Compound Table

| Label                       | Tgt Score | Mass Error (ppm) | Tgt Formula   | Obs. RT | Ref. Mass | Obs. Mass |
|-----------------------------|-----------|------------------|---------------|---------|-----------|-----------|
| Cpd 1: C24 H26 N4 O2; 3.195 | 97.01     | 1.07             | C24 H26 N4 O2 | 3.195   | 402.2056  | 402.206   |

| Obs. m/z | Obs. RT | Obs. Mass | Tgt Formula   | Tgt Mass | Tgt Mass Error (ppm) | RT Diff.        | Find Cps Algorithm |
|----------|---------|-----------|---------------|----------|----------------------|-----------------|--------------------|
| 403.2134 | 3.195   | 402.206   | C24 H26 N4 O2 | 402.2056 | 1.07                 | Find By Formula |                    |

## Compound Chromatograms

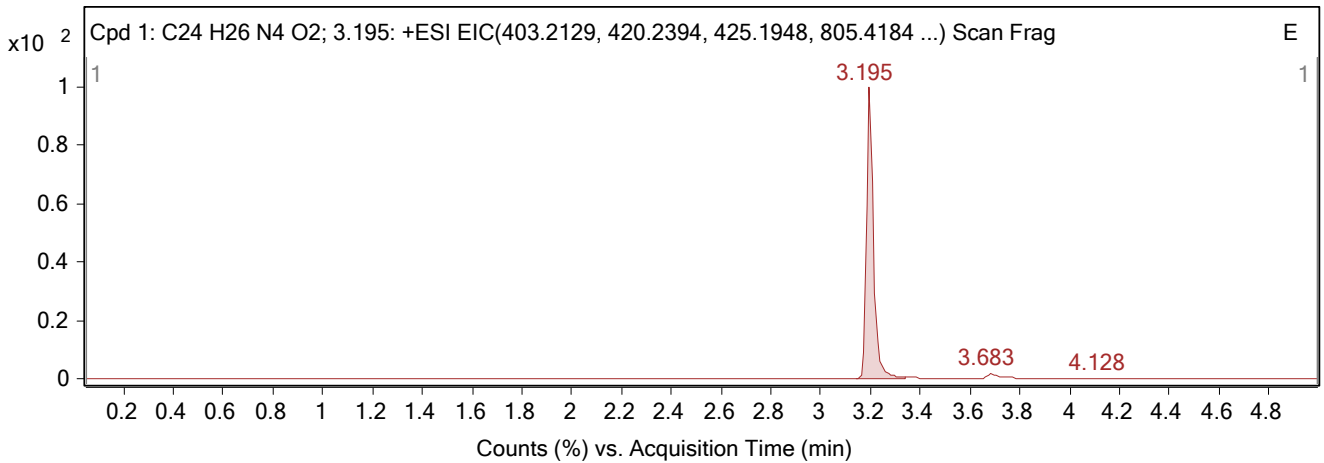

MS Zoomed Spectrum

# Target Compound Screening Report

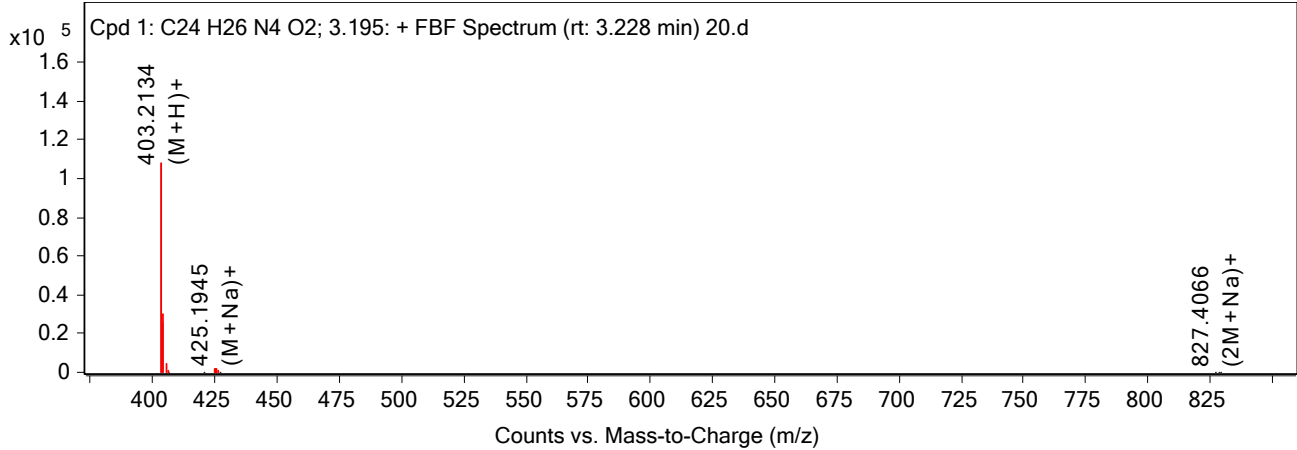

## MS Spectrum Peak List

| Obs. m/z | Charge | Abund     | Ion/Isotope           |
|----------|--------|-----------|-----------------------|
| 403.2134 | 1      | 107794.27 | (M+H)+                |
| 404.2161 | 1      | 25771.5   | (M+H)+                |
| 405.2184 | 1      | 3237.43   | (M+H)+                |
| 406.2187 | 1      | 487.92    | (M+H)+                |
| 420.2431 | 1      | 83.33     | (M+NH <sub>4</sub> )+ |
| 425.1945 | 1      | 1552.36   | (M+Na)+               |
| 426.1977 | 1      | 561.53    | (M+Na)+               |
| 427.1932 | 1      | 90.89     | (M+Na)+               |
| 827.4066 | 1      | 332.78    | (2M+Na)+              |
| 828.4058 | 1      | 257.46    | (2M+Na)+              |

## MS Zoomed Spectrum

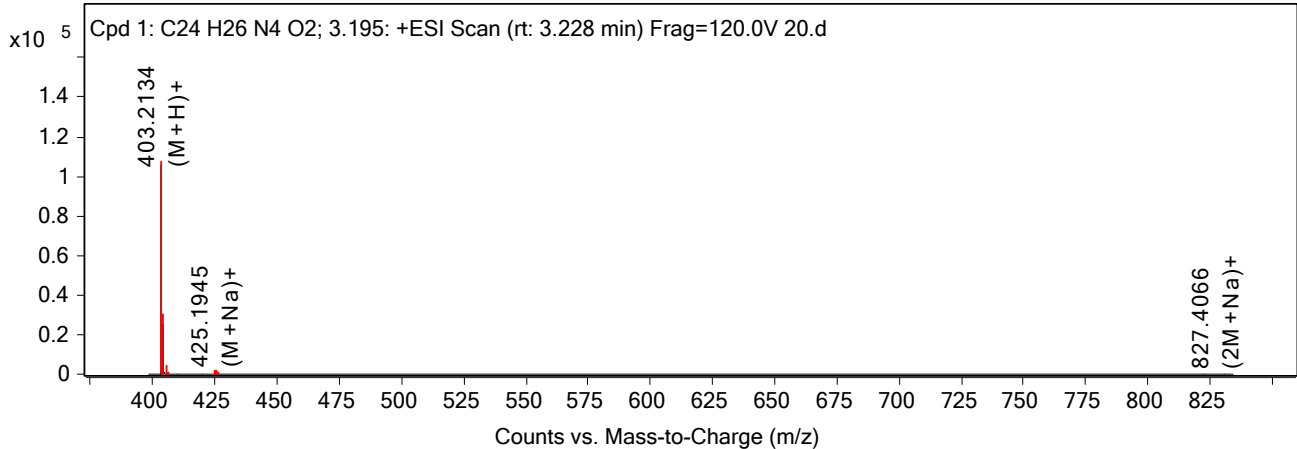

## MS Spectrum Peak List

| Obs. m/z | Charge | Abund     | Ion/Isotope           | Tgt Mass Error (ppm) |
|----------|--------|-----------|-----------------------|----------------------|
| 403.2134 | 1      | 107794.27 | (M+H)+                | -1.28                |
| 404.2161 | 1      | 25771.5   | (M+H)+                | -0.42                |
| 405.2184 | 1      | 3237.43   | (M+H)+                | 0.86                 |
| 406.2187 | 1      | 487.92    | (M+H)+                | 6.91                 |
| 420.2431 | 1      | 83.33     | (M+NH <sub>4</sub> )+ | -8.86                |
| 425.1945 | 1      | 1552.36   | (M+Na)+               | 0.62                 |
| 426.1977 | 1      | 561.53    | (M+Na)+               | 0.42                 |
| 427.1932 | 1      | 90.89     | (M+Na)+               | 17.48                |
| 827.4066 | 1      | 332.78    | (2M+Na)+              | -7.5                 |
| 828.4058 | 1      | 257.46    | (2M+Na)+              | -2.88                |

--- End Of Report ---

# Target Compound Screening Report

|                                 |                                        |                               |                                                     |
|---------------------------------|----------------------------------------|-------------------------------|-----------------------------------------------------|
| <b>Data File</b>                | 48.d                                   | <b>Sample Name</b>            | H2977001                                            |
| <b>Sample Type</b>              | Sample                                 | <b>Position</b>               | P1-F3                                               |
| <b>Instrument Name</b>          | Instrument 1                           | <b>User Name</b>              | Denis V.Bylina                                      |
| <b>Acq Method</b>               | Fast_Gradient_HRMS_pos_Lock_08272019.m | <b>Acquired Time</b>          | 9/22/2021 6:09:01 PM (UTC+03:00)                    |
| <b>IRM Calibration Status</b>   | Success                                | <b>DA Method</b>              | 1.m                                                 |
| <b>Comment</b>                  |                                        |                               |                                                     |
| <b>Sample Group</b>             |                                        | <b>Info.</b>                  | Agilent 6224 TOF LC/MS                              |
| <b>MFC</b>                      | C26H29FN4O2                            | <b>Stream Name</b>            | LC 1                                                |
| <b>Acquisition Time (Local)</b> | 9/22/2021 6:09:01 PM (UTC+03:00)       | <b>Acquisition SW Version</b> | 6200 series TOF/6500 series Q-TOF B.08.00 (B8058.0) |
| <b>TOF Driver Version</b>       | 8.00.00                                | <b>TOF Firmware Version</b>   | 8.643                                               |
| <b>Tune Mass Range Max.</b>     | 1700                                   |                               |                                                     |

## Compound Table

| Label                         | Tgt Score | Mass Error (ppm) | Tgt Formula     | Obs. RT | Ref. Mass | Obs. Mass |
|-------------------------------|-----------|------------------|-----------------|---------|-----------|-----------|
| Cpd 1: C26 H29 F N4 O2; 3.391 | 97.26     | 0.21             | C26 H29 F N4 O2 | 3.391   | 448.2275  | 448.2275  |

| Obs. m/z | Obs. RT | Obs. Mass | Tgt Formula     | Tgt Mass | Tgt Mass Error (ppm) | RT Diff.        | Find Cpd Algorithm |
|----------|---------|-----------|-----------------|----------|----------------------|-----------------|--------------------|
| 449.2348 | 3.391   | 448.2275  | C26 H29 F N4 O2 | 448.2275 | 0.21                 | Find By Formula |                    |

## Compound Chromatograms

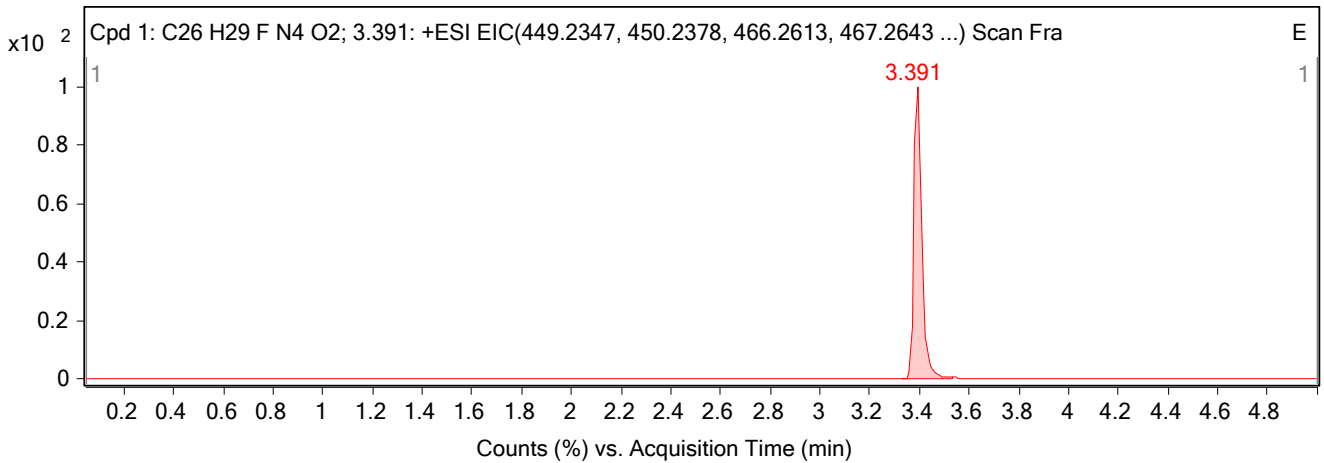

MS Zoomed Spectrum

# Target Compound Screening Report

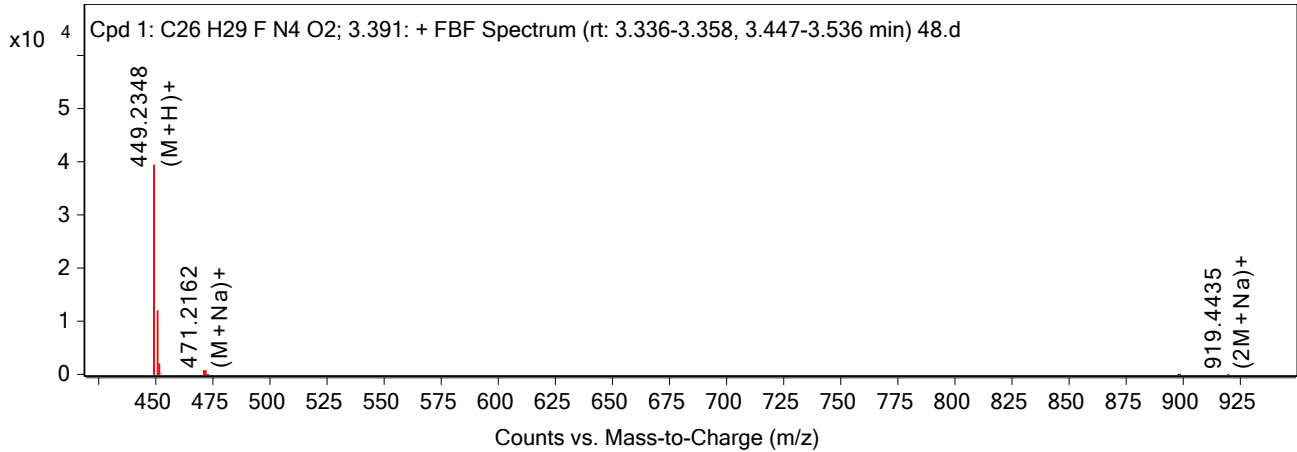

## MS Spectrum Peak List

| Obs. m/z | Charge | Abund    | Ion/Isotope |
|----------|--------|----------|-------------|
| 449.2348 | 1      | 39302.29 | (M+H)+      |
| 450.2378 | 1      | 10142.3  | (M+H)+      |
| 451.2414 | 1      | 1546.89  | (M+H)+      |
| 471.2162 | 1      | 481.15   | (M+Na)+     |
| 472.2168 | 1      | 153.97   | (M+Na)+     |
| 897.4758 | 1      | 74.67    | (2M+H)+     |
| 898.454  | 1      | 33.05    | (2M+H)+     |
| 919.4435 | 1      | 90.67    | (2M+Na)+    |

## MS Zoomed Spectrum

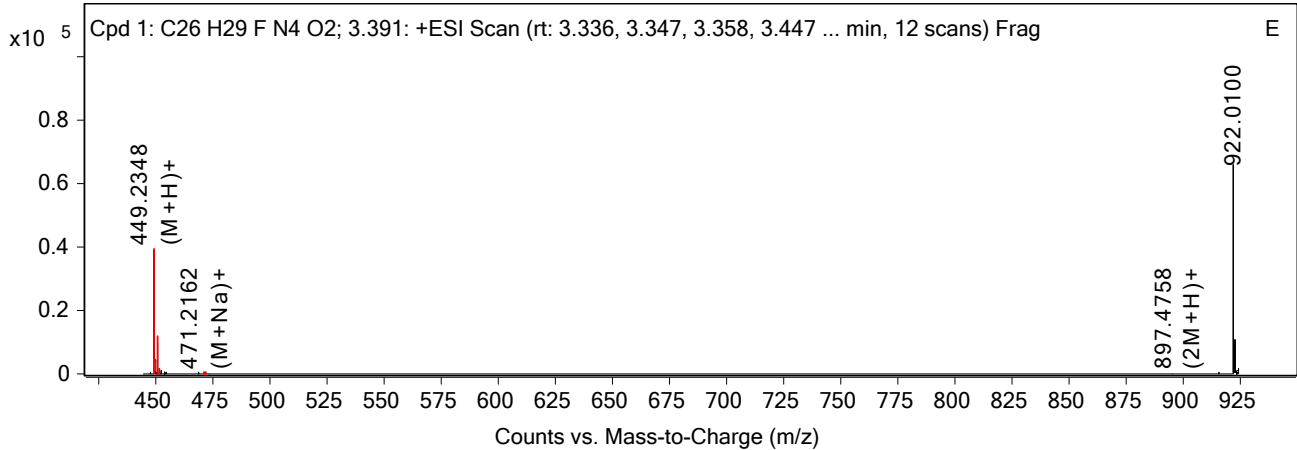

## MS Spectrum Peak List

| Obs. m/z | Charge | Abund    | Ion/Isotope | Tgt Mass Error (ppm) |
|----------|--------|----------|-------------|----------------------|
| 449.2348 | 1      | 39302.29 | (M+H)+      | -0.23                |
| 450.2378 | 1      | 10142.3  | (M+H)+      | 0.01                 |
| 451.2414 | 1      | 1546.89  | (M+H)+      | -1.52                |
| 471.2162 | 1      | 481.15   | (M+Na)+     | 0.96                 |
| 472.2168 | 1      | 153.97   | (M+Na)+     | 6.19                 |
| 897.4758 | 1      | 74.67    | (2M+H)+     | -15.12               |
| 898.454  | 1      | 33.05    | (2M+H)+     | 12.54                |
| 919.4435 | 1      | 90.67    | (2M+Na)+    | 0.7                  |
| 922.01   |        | 65807.62 |             |                      |

--- End Of Report ---



# Target Compound Screening Report

|                                 |                                        |                               |                                                     |
|---------------------------------|----------------------------------------|-------------------------------|-----------------------------------------------------|
| <b>Data File</b>                | 42.d                                   | <b>Sample Name</b>            | H2976534                                            |
| <b>Sample Type</b>              | Sample                                 | <b>Position</b>               | P1-E6                                               |
| <b>Instrument Name</b>          | Instrument 1                           | <b>User Name</b>              | Denis V.Bylina                                      |
| <b>Acq Method</b>               | Fast_Gradient_HRMS_pos_Lock_08272019.m | <b>Acquired Time</b>          | 9/22/2021 5:35:40 PM (UTC+03:00)                    |
| <b>IRM Calibration Status</b>   | Success                                | <b>DA Method</b>              | 1.m                                                 |
| <b>Comment</b>                  |                                        |                               |                                                     |
| <b>Sample Group</b>             |                                        | <b>Info.</b>                  | Agilent 6224 TOF LC/MS                              |
| <b>MFC</b>                      | C25H27FN4O2                            | <b>Stream Name</b>            | LC 1                                                |
| <b>Acquisition Time (Local)</b> | 9/22/2021 5:35:40 PM (UTC+03:00)       | <b>Acquisition SW Version</b> | 6200 series TOF/6500 series Q-TOF B.08.00 (B8058.0) |
| <b>TOF Driver Version</b>       | 8.00.00                                | <b>TOF Firmware Version</b>   | 8.643                                               |
| <b>Tune Mass Range Max.</b>     | 1700                                   |                               |                                                     |

### Compound Table

| Label                         | Tgt Score | Mass Error (ppm) | Tgt Formula     | Obs. RT | Ref. Mass | Obs. Mass |
|-------------------------------|-----------|------------------|-----------------|---------|-----------|-----------|
| Cpd 1: C25 H27 F N4 O2; 3.297 | 95.89     | -0.25            | C25 H27 F N4 O2 | 3.297   | 434.2118  | 434.2117  |

| Obs. m/z | Obs. RT | Obs. Mass | Tgt Formula     | Tgt Mass | Tgt Mass Error (ppm) | RT Diff.        | Find Cpds Algorithm |
|----------|---------|-----------|-----------------|----------|----------------------|-----------------|---------------------|
| 435.2189 | 3.297   | 434.2117  | C25 H27 F N4 O2 | 434.2118 | -0.25                | Find By Formula |                     |

### Compound Chromatograms

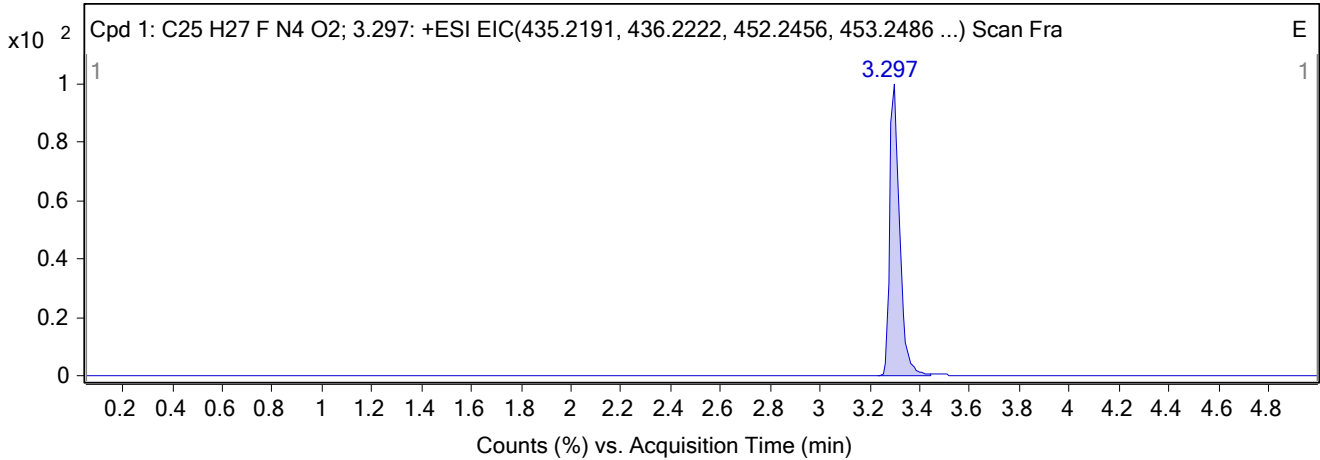

MS Zoomed Spectrum

# Target Compound Screening Report

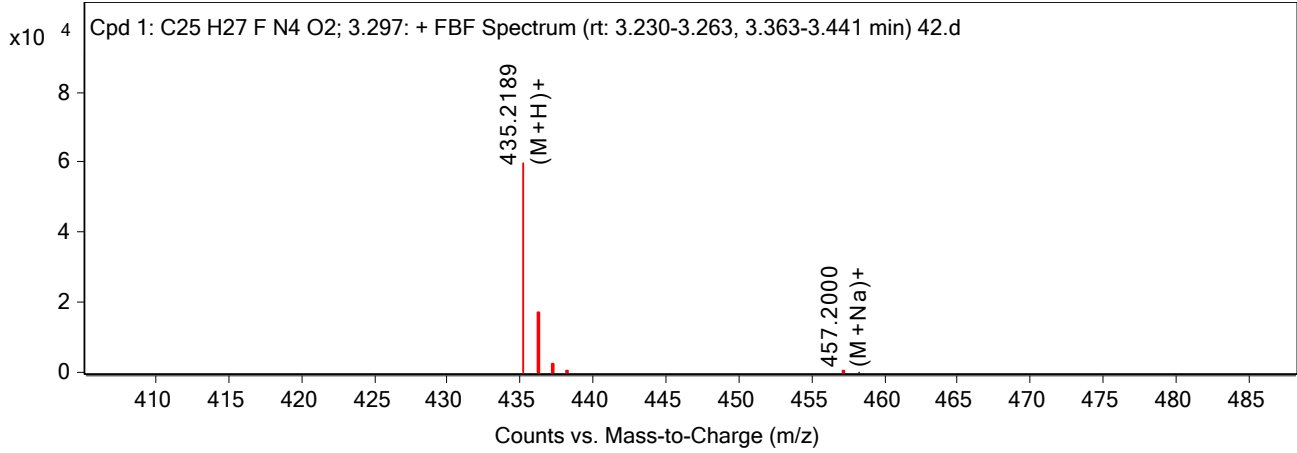

## MS Spectrum Peak List

| Obs. m/z | Charge | Abund    | Ion/Isotope |
|----------|--------|----------|-------------|
| 435.2189 | 1      | 59655.84 | (M+H)+      |
| 436.2221 | 1      | 14278.27 | (M+H)+      |
| 437.2251 | 1      | 2291.54  | (M+H)+      |
| 438.2289 | 1      | 292.88   | (M+H)+      |
| 457.2    | 1      | 321.46   | (M+Na)+     |
| 458.2053 | 1      | 105.95   | (M+Na)+     |

## MS Zoomed Spectrum

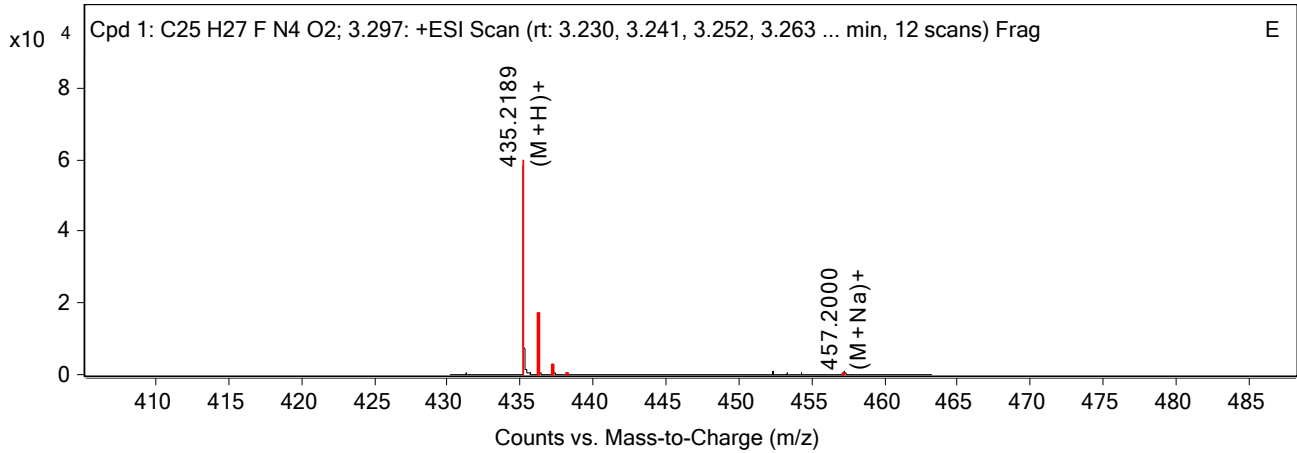

## MS Spectrum Peak List

| Obs. m/z | Charge | Abund    | Ion/Isotope | Tgt Mass Error (ppm) |
|----------|--------|----------|-------------|----------------------|
| 435.2189 | 1      | 59655.84 | (M+H)+      | 0.3                  |
| 436.2221 | 1      | 14278.27 | (M+H)+      | 0.11                 |
| 437.2251 | 1      | 2291.54  | (M+H)+      | -0.15                |
| 438.2289 | 1      | 292.88   | (M+H)+      | -2.57                |
| 457.2    | 1      | 321.46   | (M+Na)+     | 2.15                 |
| 458.2053 | 1      | 105.95   | (M+Na)+     | -2.72                |

--- End Of Report ---

# Target Compound Screening Report

|                                 |                                        |                               |                                                     |
|---------------------------------|----------------------------------------|-------------------------------|-----------------------------------------------------|
| <b>Data File</b>                | 38.d                                   | <b>Sample Name</b>            | H2978886                                            |
| <b>Sample Type</b>              | Sample                                 | <b>Position</b>               | P1-E2                                               |
| <b>Instrument Name</b>          | Instrument 1                           | <b>User Name</b>              | Denis V.Bylina                                      |
| <b>Acq Method</b>               | Fast_Gradient_HRMS_pos_Lock_08272019.m | <b>Acquired Time</b>          | 9/22/2021 5:13:26 PM (UTC+03:00)                    |
| <b>IRM Calibration Status</b>   | Success                                | <b>DA Method</b>              | 1.m                                                 |
| <b>Comment</b>                  |                                        |                               |                                                     |
| <b>Sample Group</b>             |                                        | <b>Info.</b>                  | Agilent 6224 TOF LC/MS                              |
| <b>MFC</b>                      | C25H29N5O2                             | <b>Stream Name</b>            | LC 1                                                |
| <b>Acquisition Time (Local)</b> | 9/22/2021 5:13:26 PM (UTC+03:00)       | <b>Acquisition SW Version</b> | 6200 series TOF/6500 series Q-TOF B.08.00 (B8058.0) |
| <b>TOF Driver Version</b>       | 8.00.00                                | <b>TOF Firmware Version</b>   | 8.643                                               |
| <b>Tune Mass Range Max.</b>     | 1700                                   |                               |                                                     |

## Compound Table

| Label                       | Tgt Score | Mass Error (ppm) | Tgt Formula   | Obs. RT | Ref. Mass | Obs. Mass |
|-----------------------------|-----------|------------------|---------------|---------|-----------|-----------|
| Cpd 1: C25 H29 N5 O2; 3.046 | 95.06     | -0.36            | C25 H29 N5 O2 | 3.046   | 431.2321  | 431.232   |

| Obs. m/z | Obs. RT | Obs. Mass | Tgt Formula   | Tgt Mass | Tgt Mass Error (ppm) | RT Diff.        | Find Cpds Algorithm |
|----------|---------|-----------|---------------|----------|----------------------|-----------------|---------------------|
| 432.2393 | 3.046   | 431.232   | C25 H29 N5 O2 | 431.2321 | -0.36                | Find By Formula |                     |

## Compound Chromatograms

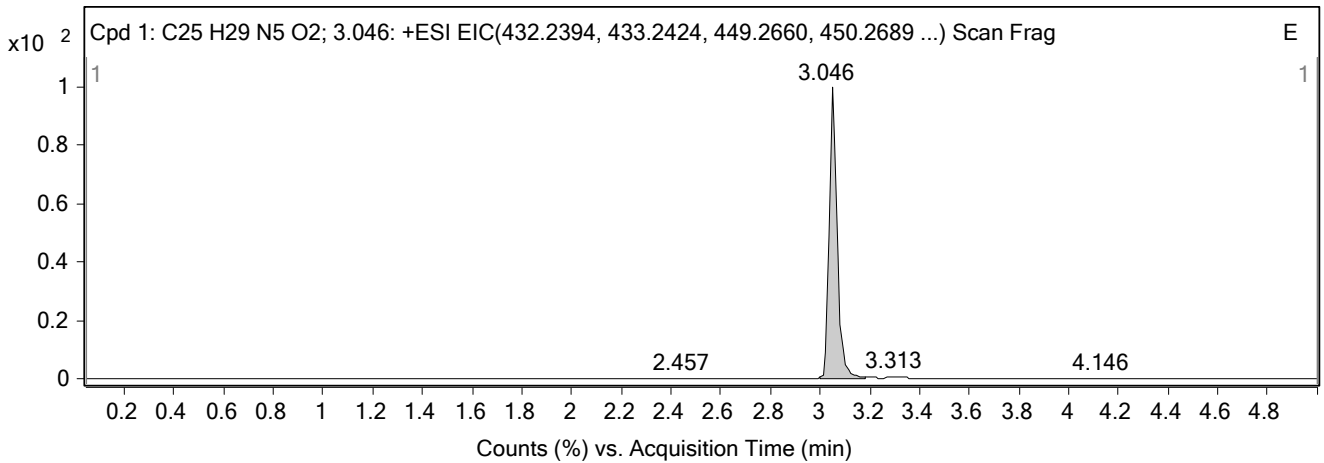

MS Zoomed Spectrum

# Target Compound Screening Report

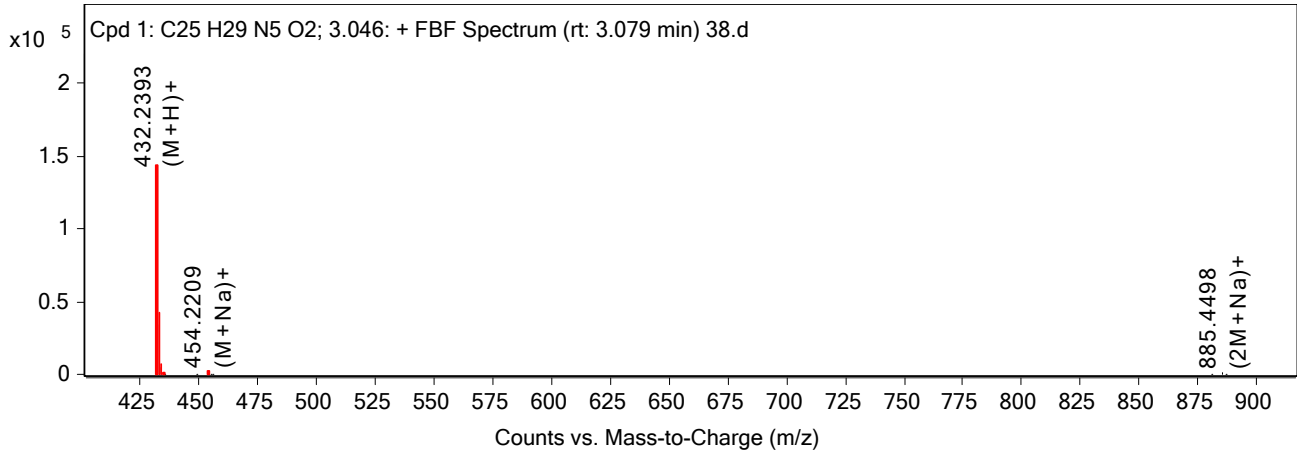

## MS Spectrum Peak List

| Obs. m/z | Charge | Abund    | Ion/Isotope |
|----------|--------|----------|-------------|
| 432.2393 | 1      | 143589.5 | (M+H)+      |
| 433.2423 | 1      | 34081.01 | (M+H)+      |
| 434.2449 | 1      | 4774.8   | (M+H)+      |
| 435.2461 | 1      | 498.31   | (M+H)+      |
| 454.2209 | 1      | 1831.04  | (M+Na)+     |
| 455.22   | 1      | 561.48   | (M+Na)+     |
| 456.2174 | 1      | 136      | (M+Na)+     |
| 880.4958 | 1      | 66.17    | (2M+NH4)+   |
| 885.4498 | 1      | 670.12   | (2M+Na)+    |
| 886.4526 | 1      | 361.27   | (2M+Na)+    |

## MS Zoomed Spectrum

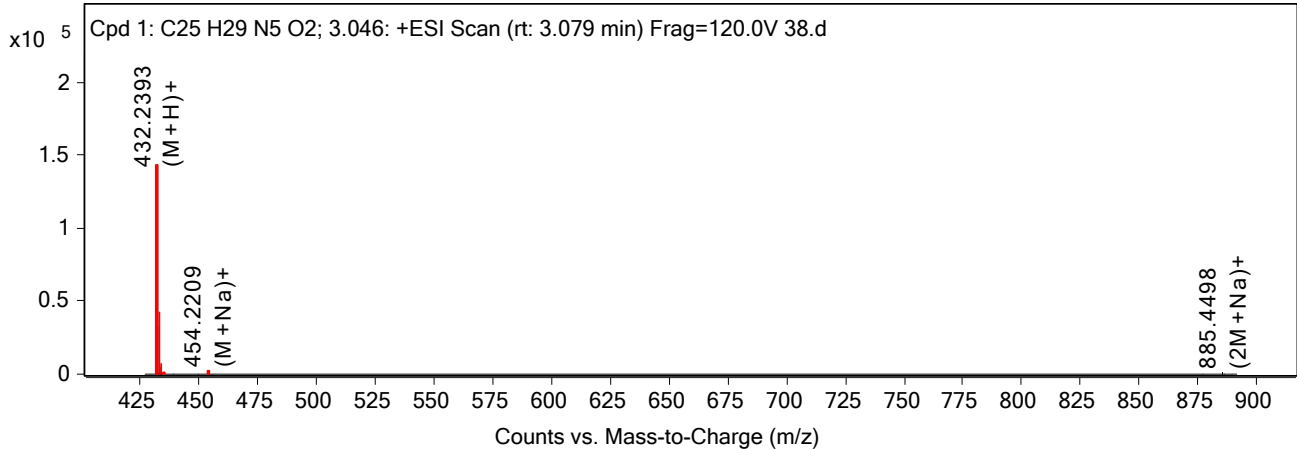

## MS Spectrum Peak List

| Obs. m/z | Charge | Abund     | Ion/Isotope | Tgt Mass Error (ppm) |
|----------|--------|-----------|-------------|----------------------|
| 432.2393 | 1      | 143589.51 | (M+H)+      | 0.25                 |
| 433.2423 | 1      | 34081.01  | (M+H)+      | 0.13                 |
| 434.2449 | 1      | 4774.8    | (M+H)+      | 0.7                  |
| 435.2461 | 1      | 498.31    | (M+H)+      | 4.13                 |
| 454.2209 | 1      | 1831.04   | (M+Na)+     | 1.08                 |
| 455.22   | 1      | 561.48    | (M+Na)+     | 9.45                 |
| 456.2174 | 1      | 136       | (M+Na)+     | 21.33                |
| 880.4958 | 1      | 66.17     | (2M+NH4)+   | 2.61                 |
| 885.4498 | 1      | 670.12    | (2M+Na)+    | 4.18                 |
| 886.4526 | 1      | 361.28    | (2M+Na)+    | 4.41                 |

--- End Of Report ---

# Target Compound Screening Report

|                                 |                                        |                               |                                                     |
|---------------------------------|----------------------------------------|-------------------------------|-----------------------------------------------------|
| <b>Data File</b>                | 28.d                                   | <b>Sample Name</b>            | H3007333                                            |
| <b>Sample Type</b>              | Sample                                 | <b>Position</b>               | P1-D1                                               |
| <b>Instrument Name</b>          | Instrument 1                           | <b>User Name</b>              | Denis V.Bylina                                      |
| <b>Acq Method</b>               | Fast_Gradient_HRMS_pos_Lock_08272019.m | <b>Acquired Time</b>          | 9/24/2021 1:07:04 PM (UTC+03:00)                    |
| <b>IRM Calibration Status</b>   | Success                                | <b>DA Method</b>              | 1.m                                                 |
| <b>Comment</b>                  |                                        |                               |                                                     |
| <b>Sample Group</b>             |                                        | <b>Info.</b>                  | Agilent 6224 TOF LC/MS                              |
| <b>MFC</b>                      | C25H44N2O2                             | <b>Stream Name</b>            | LC 1                                                |
| <b>Acquisition Time (Local)</b> | 9/24/2021 1:07:04 PM (UTC+03:00)       | <b>Acquisition SW Version</b> | 6200 series TOF/6500 series Q-TOF B.08.00 (B8058.0) |
| <b>TOF Driver Version</b>       | 8.00.00                                | <b>TOF Firmware Version</b>   | 8.643                                               |
| <b>Tune Mass Range Max.</b>     | 1700                                   |                               |                                                     |

## Compound Table

| Label                       | Tgt Score | Mass Error (ppm) | Tgt Formula   | Obs. RT | Ref. Mass | Obs. Mass |
|-----------------------------|-----------|------------------|---------------|---------|-----------|-----------|
| Cpd 1: C25 H44 N2 O2; 3.667 | 94.6      | -2.92            | C25 H44 N2 O2 | 3.667   | 404.3403  | 404.3391  |

| Obs. m/z | Obs. RT | Obs. Mass | Tgt Formula   | Tgt Mass | Tgt Mass Error (ppm) | RT Diff.        | Find Cpds Algorithm |
|----------|---------|-----------|---------------|----------|----------------------|-----------------|---------------------|
| 405.3466 | 3.667   | 404.3391  | C25 H44 N2 O2 | 404.3403 | -2.92                | Find By Formula |                     |

## Compound Chromatograms

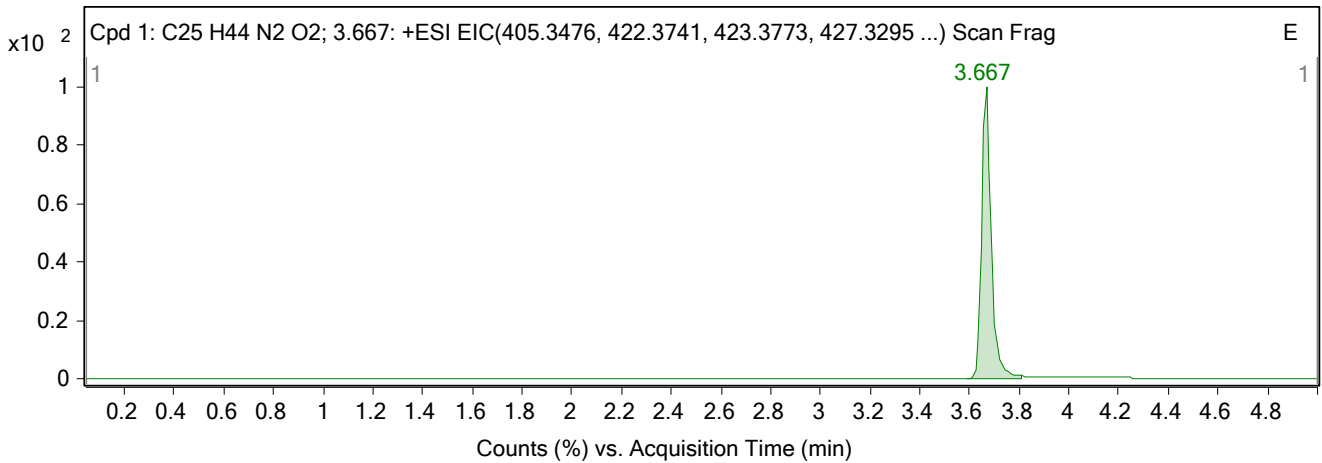

MS Zoomed Spectrum

# Target Compound Screening Report

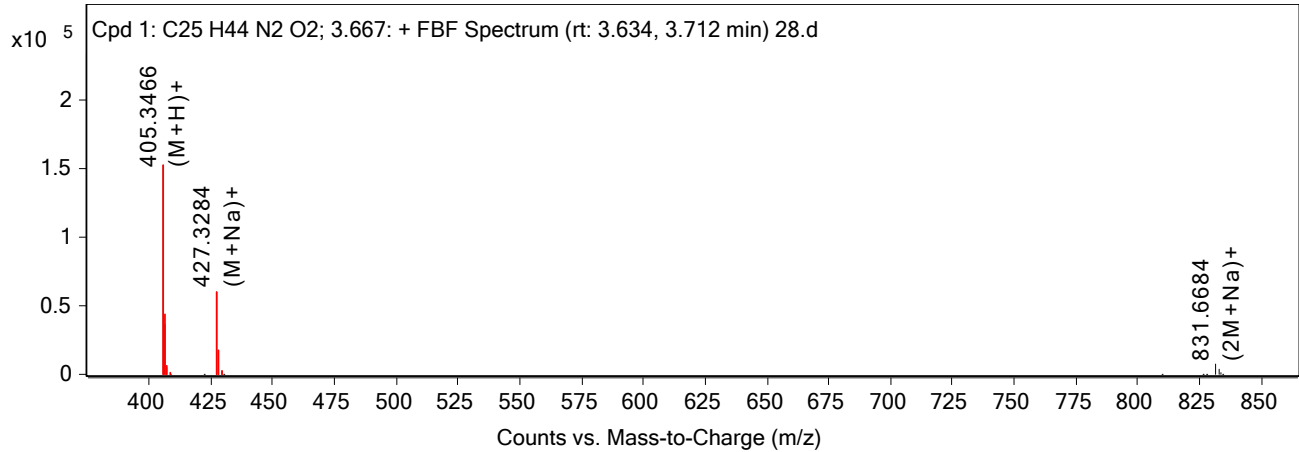

## MS Spectrum Peak List

| Obs. m/z | Charge | Abund     | Ion/Isotope |
|----------|--------|-----------|-------------|
| 405.3466 | 1      | 152406.67 | (M+H)+      |
| 406.3496 | 1      | 35746.78  | (M+H)+      |
| 407.3522 | 1      | 5145.98   | (M+H)+      |
| 408.3508 | 1      | 602.08    | (M+H)+      |
| 427.3284 | 1      | 60534.8   | (M+Na)+     |
| 428.3315 | 1      | 14707.77  | (M+Na)+     |
| 429.3317 | 1      | 2699.94   | (M+Na)+     |
| 831.6684 | 1      | 7108.09   | (2M+Na)+    |
| 832.6707 | 1      | 4067.8    | (2M+Na)+    |
| 833.6686 | 1      | 1243.77   | (2M+Na)+    |

## MS Zoomed Spectrum

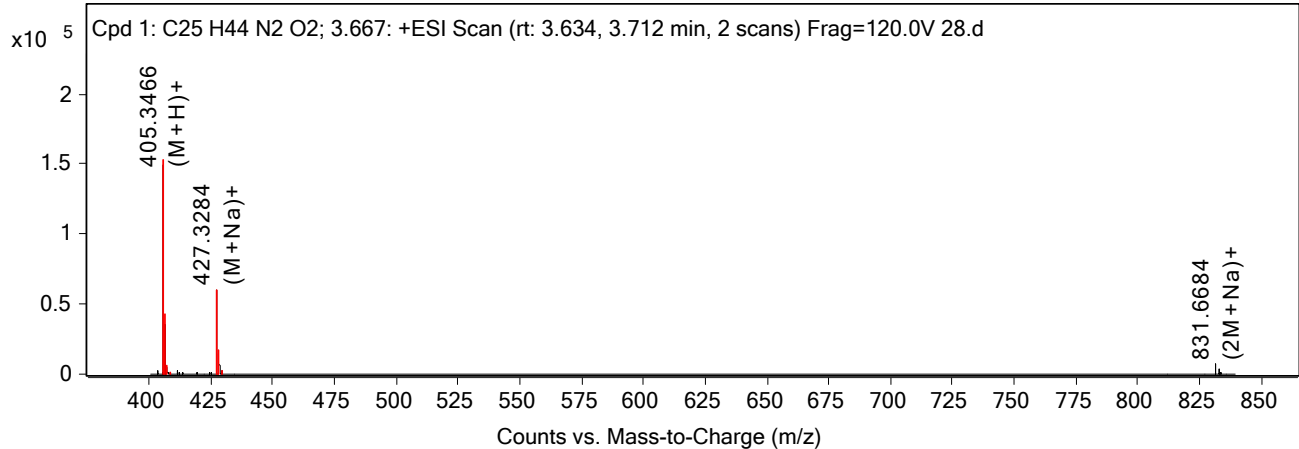

## MS Spectrum Peak List

| Obs. m/z | Charge | Abund     | Ion/Isotope | Tgt Mass Error (ppm) |
|----------|--------|-----------|-------------|----------------------|
| 405.3466 | 1      | 152406.66 | (M+H)+      | 2.3                  |
| 406.3496 | 1      | 35746.78  | (M+H)+      | 2.96                 |
| 407.3522 | 1      | 5145.98   | (M+H)+      | 4.01                 |
| 408.3508 | 1      | 602.08    | (M+H)+      | 14.44                |
| 427.3284 | 1      | 60534.8   | (M+Na)+     | 2.66                 |
| 428.3315 | 1      | 14707.77  | (M+Na)+     | 3                    |
| 429.3317 | 1      | 2699.94   | (M+Na)+     | 9.57                 |
| 831.6684 | 1      | 7108.09   | (2M+Na)+    | 1.65                 |
| 832.6707 | 1      | 4067.8    | (2M+Na)+    | 2.76                 |
| 833.6686 | 1      | 1243.77   | (2M+Na)+    | 9.04                 |

--- End Of Report ---

# Target Compound Screening Report

|                                 |                                        |                               |                                                     |
|---------------------------------|----------------------------------------|-------------------------------|-----------------------------------------------------|
| <b>Data File</b>                | 15-a3.d                                | <b>Sample Name</b>            | H2986297                                            |
| <b>Sample Type</b>              | Sample                                 | <b>Position</b>               | P1-B6                                               |
| <b>Instrument Name</b>          | Instrument 1                           | <b>User Name</b>              | Denis V.Bylina                                      |
| <b>Acq Method</b>               | Fast_Gradient_HRMS_pos_Lock_08272019.m | <b>Acquired Time</b>          | 9/23/2021 5:53:18 PM (UTC+03:00)                    |
| <b>IRM Calibration Status</b>   | Success                                | <b>DA Method</b>              | 1.m                                                 |
| <b>Comment</b>                  |                                        |                               |                                                     |
| <b>Sample Group</b>             |                                        | <b>Info.</b>                  | Agilent 6224 TOF LC/MS                              |
| <b>MFC</b>                      | C24H42N2O2                             | <b>Stream Name</b>            | LC 1                                                |
| <b>Acquisition Time (Local)</b> | 9/23/2021 5:53:18 PM (UTC+03:00)       | <b>Acquisition SW Version</b> | 6200 series TOF/6500 series Q-TOF B.08.00 (B8058.0) |
| <b>TOF Driver Version</b>       | 8.00.00                                | <b>TOF Firmware Version</b>   | 8.643                                               |
| <b>Tune Mass Range Max.</b>     | 1700                                   |                               |                                                     |

### Compound Table

| Label                       | Tgt Score | Mass Error (ppm) | Tgt Formula   | Obs. RT | Ref. Mass | Obs. Mass |
|-----------------------------|-----------|------------------|---------------|---------|-----------|-----------|
| Cpd 1: C24 H42 N2 O2; 3.615 | 98.05     | -1.81            | C24 H42 N2 O2 | 3.615   | 390.3246  | 390.3239  |

| Obs. m/z | Obs. RT | Obs. Mass | Tgt Formula   | Tgt Mass | Tgt Mass Error (ppm) | RT Diff.        | Find Cpds Algorithm |
|----------|---------|-----------|---------------|----------|----------------------|-----------------|---------------------|
| 413.3132 | 3.615   | 390.3239  | C24 H42 N2 O2 | 390.3246 | -1.81                | Find By Formula |                     |

### Compound Chromatograms

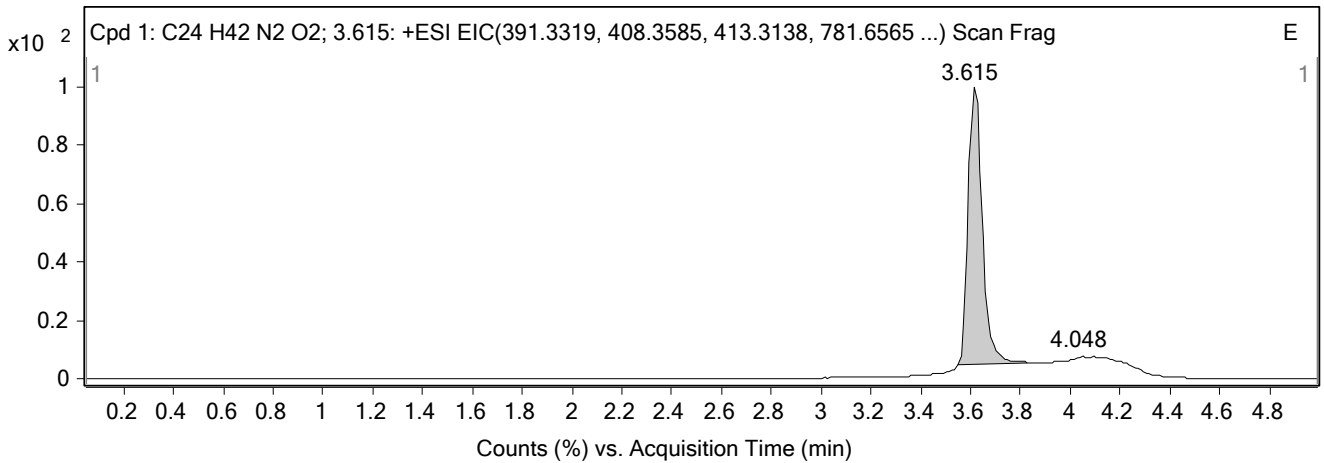

MS Zoomed Spectrum

# Target Compound Screening Report

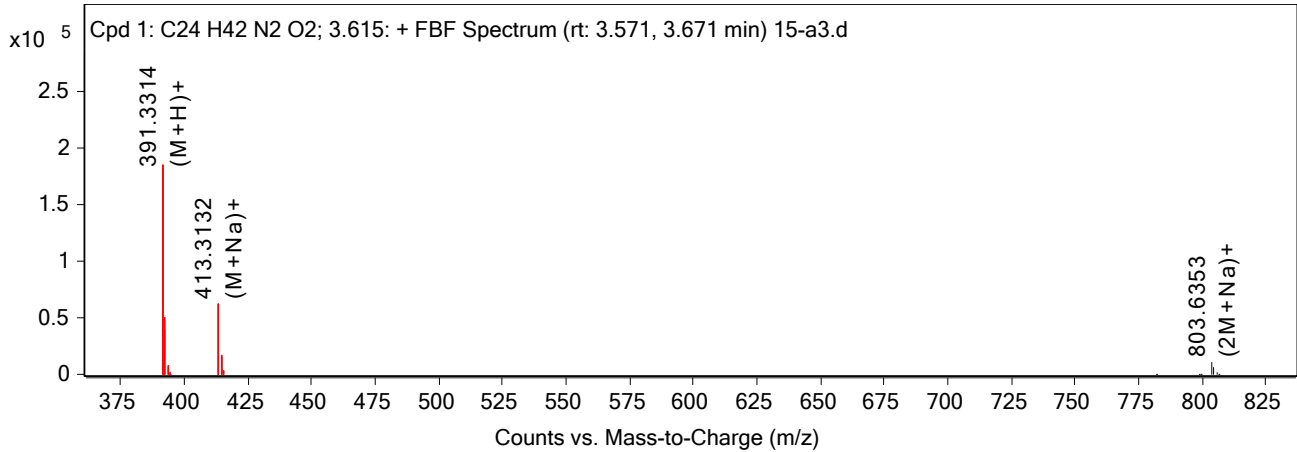

## MS Spectrum Peak List

| Obs. m/z | Charge | Abund     | Ion/Isotope |
|----------|--------|-----------|-------------|
| 391.3314 | 1      | 183993.78 | (M+H)+      |
| 392.3345 | 1      | 39800.55  | (M+H)+      |
| 393.3377 | 1      | 5452.61   | (M+H)+      |
| 394.3343 | 1      | 682.64    | (M+H)+      |
| 413.3132 | 1      | 62638.36  | (M+Na)+     |
| 414.3163 | 1      | 15422.1   | (M+Na)+     |
| 415.3187 | 1      | 2553.1    | (M+Na)+     |
| 803.6353 | 1      | 10966.41  | (2M+Na)+    |
| 804.6397 | 1      | 5701.53   | (2M+Na)+    |
| 805.6421 | 1      | 1610.93   | (2M+Na)+    |

## MS Zoomed Spectrum

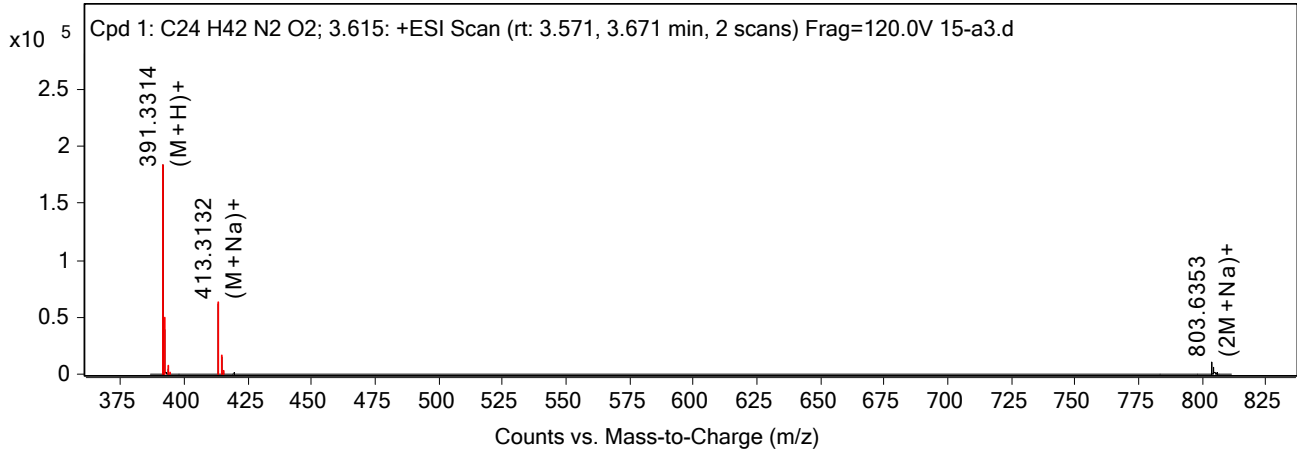

## MS Spectrum Peak List

| Obs. m/z | Charge | Abund     | Ion/Isotope | Tgt Mass Error (ppm) |
|----------|--------|-----------|-------------|----------------------|
| 391.3314 | 1      | 183993.78 | (M+H)+      | 1.19                 |
| 392.3345 | 1      | 39800.55  | (M+H)+      | 1.56                 |
| 393.3377 | 1      | 5452.61   | (M+H)+      | 1.02                 |
| 394.3343 | 1      | 682.64    | (M+H)+      | 17.03                |
| 413.3132 | 1      | 62638.36  | (M+Na)+     | 1.67                 |
| 414.3163 | 1      | 15422.1   | (M+Na)+     | 1.81                 |
| 415.3187 | 1      | 2553.1    | (M+Na)+     | 3.27                 |
| 803.6353 | 1      | 10966.4   | (2M+Na)+    | 3.91                 |
| 804.6397 | 1      | 5701.53   | (2M+Na)+    | 2.45                 |
| 805.6421 | 1      | 1610.93   | (2M+Na)+    | 3.41                 |

--- End Of Report ---



# Target Compound Screening Report

|                                 |                                        |                               |                                                     |
|---------------------------------|----------------------------------------|-------------------------------|-----------------------------------------------------|
| <b>Data File</b>                | 22.d                                   | <b>Sample Name</b>            | H2990768                                            |
| <b>Sample Type</b>              | Sample                                 | <b>Position</b>               | P1-C4                                               |
| <b>Instrument Name</b>          | Instrument 1                           | <b>User Name</b>              | Denis V.Bylina                                      |
| <b>Acq Method</b>               | Fast_Gradient_HRMS_pos_Lock_08272019.m | <b>Acquired Time</b>          | 9/24/2021 12:15:20 PM (UTC+03:00)                   |
| <b>IRM Calibration Status</b>   | Success                                | <b>DA Method</b>              | 1.m                                                 |
| <b>Comment</b>                  |                                        |                               |                                                     |
| <b>Sample Group</b>             |                                        | <b>Info.</b>                  | Agilent 6224 TOF LC/MS                              |
| <b>MFC</b>                      | C24H42N2O2                             | <b>Stream Name</b>            | LC 1                                                |
| <b>Acquisition Time (Local)</b> | 9/24/2021 12:15:20 PM (UTC+03:00)      | <b>Acquisition SW Version</b> | 6200 series TOF/6500 series Q-TOF B.08.00 (B8058.0) |
| <b>TOF Driver Version</b>       | 8.00.00                                | <b>TOF Firmware Version</b>   | 8.643                                               |
| <b>Tune Mass Range Max.</b>     | 1700                                   |                               |                                                     |

### Compound Table

| Label                       | Tgt Score | Mass Error (ppm) | Tgt Formula   | Obs. RT | Ref. Mass | Obs. Mass |
|-----------------------------|-----------|------------------|---------------|---------|-----------|-----------|
| Cpd 1: C24 H42 N2 O2; 3.488 | 94.87     | -2.42            | C24 H42 N2 O2 | 3.488   | 390.3246  | 390.3237  |

| Obs. m/z | Obs. RT | Obs. Mass | Tgt Formula   | Tgt Mass | Tgt Mass Error (ppm) | RT Diff.        | Find Cpds Algorithm |
|----------|---------|-----------|---------------|----------|----------------------|-----------------|---------------------|
| 803.6364 | 3.488   | 390.3237  | C24 H42 N2 O2 | 390.3246 | -2.42                | Find By Formula |                     |

### Compound Chromatograms

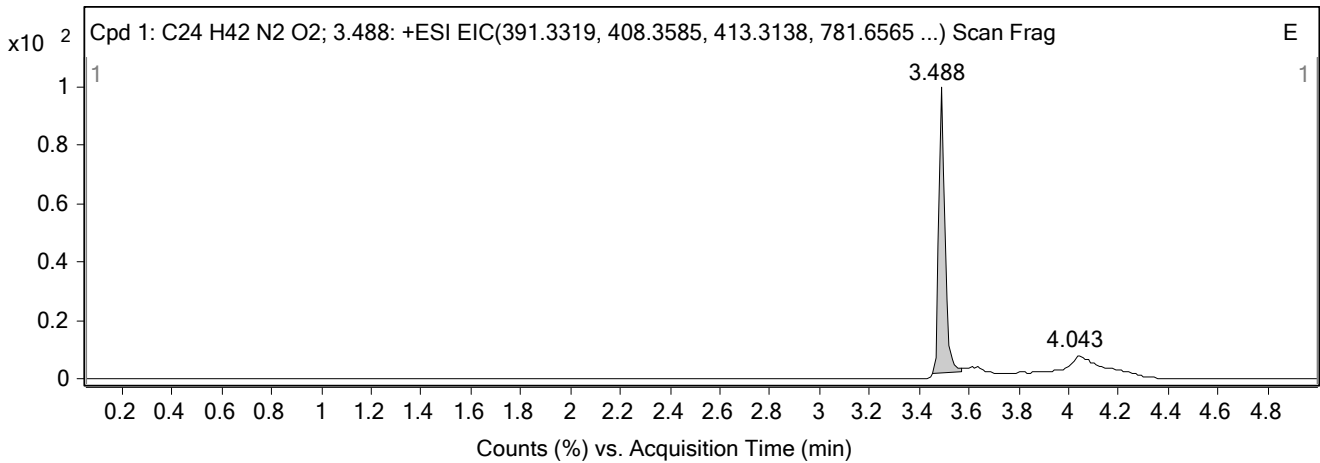

MS Zoomed Spectrum

# Target Compound Screening Report

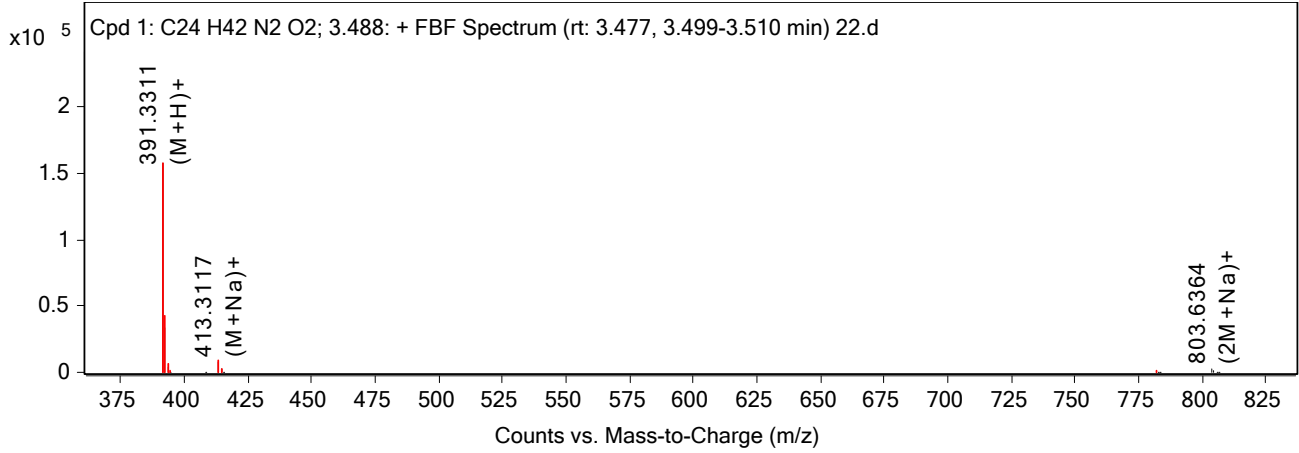

### MS Spectrum Peak List

| Obs. m/z | Charge | Abund    | Ion/Isotope |
|----------|--------|----------|-------------|
| 391.3311 | 1      | 157186.2 | (M+H)+      |
| 392.3343 | 1      | 34222.82 | (M+H)+      |
| 393.3367 | 1      | 4374.26  | (M+H)+      |
| 394.3365 | 1      | 581.23   | (M+H)+      |
| 413.3117 | 1      | 8389.9   | (M+Na)+     |
| 414.3157 | 1      | 2212.25  | (M+Na)+     |
| 415.3139 | 1      | 561.18   | (M+Na)+     |
| 781.6537 | 1      | 848.04   | (2M+H)+     |
| 803.6364 | 1      | 2707.53  | (2M+Na)+    |
| 804.6401 | 1      | 1508.45  | (2M+Na)+    |

### MS Zoomed Spectrum

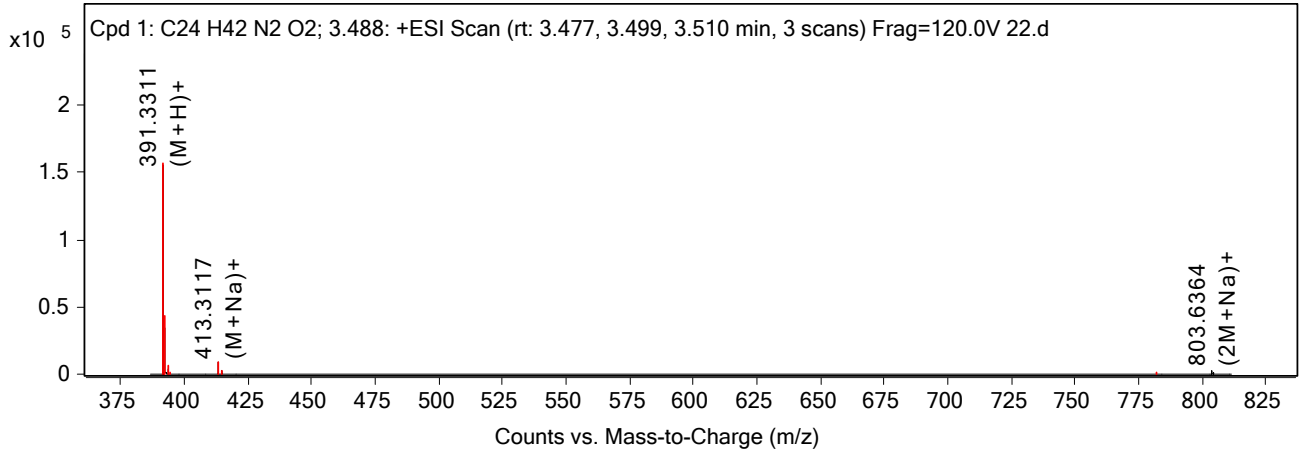

### MS Spectrum Peak List

| Obs. m/z | Charge | Abund    | Ion/Isotope | Tgt Mass Error (ppm) |
|----------|--------|----------|-------------|----------------------|
| 391.3311 | 1      | 157186.2 | (M+H)+      | 2.05                 |
| 392.3343 | 1      | 34222.83 | (M+H)+      | 2.13                 |
| 393.3367 | 1      | 4374.26  | (M+H)+      | 3.68                 |
| 394.3365 | 1      | 581.23   | (M+H)+      | 11.37                |
| 413.3117 | 1      | 8389.9   | (M+Na)+     | 5.14                 |
| 414.3157 | 1      | 2212.25  | (M+Na)+     | 3.3                  |
| 415.3139 | 1      | 561.18   | (M+Na)+     | 14.79                |
| 781.6537 | 1      | 848.04   | (2M+H)+     | 3.65                 |
| 803.6364 | 1      | 2707.53  | (2M+Na)+    | 2.56                 |
| 804.6401 | 1      | 1508.45  | (2M+Na)+    | 2.05                 |

--- End Of Report ---

# Target Compound Screening Report

|                                 |                                        |                               |                                                     |
|---------------------------------|----------------------------------------|-------------------------------|-----------------------------------------------------|
| <b>Data File</b>                | 18.d                                   | <b>Sample Name</b>            | H2987841                                            |
| <b>Sample Type</b>              | Sample                                 | <b>Position</b>               | P1-B9                                               |
| <b>Instrument Name</b>          | Instrument 1                           | <b>User Name</b>              | Denis V.Bylina                                      |
| <b>Acq Method</b>               | Fast_Gradient_HRMS_pos_Lock_08272019.m | <b>Acquired Time</b>          | 9/22/2021 3:22:21 PM (UTC+03:00)                    |
| <b>IRM Calibration Status</b>   | Success                                | <b>DA Method</b>              | 1.m                                                 |
| <b>Comment</b>                  |                                        |                               |                                                     |
| <b>Sample Group</b>             |                                        | <b>Info.</b>                  | Agilent 6224 TOF LC/MS                              |
| <b>MFC</b>                      | C22H38N2O2                             | <b>Stream Name</b>            | LC 1                                                |
| <b>Acquisition Time (Local)</b> | 9/22/2021 3:22:21 PM (UTC+03:00)       | <b>Acquisition SW Version</b> | 6200 series TOF/6500 series Q-TOF B.08.00 (B8058.0) |
| <b>TOF Driver Version</b>       | 8.00.00                                | <b>TOF Firmware Version</b>   | 8.643                                               |
| <b>Tune Mass Range Max.</b>     | 1700                                   |                               |                                                     |

## Compound Table

| Label                       | Tgt Score | Mass Error (ppm) | Tgt Formula   | Obs. RT | Ref. Mass | Obs. Mass |
|-----------------------------|-----------|------------------|---------------|---------|-----------|-----------|
| Cpd 1: C22 H38 N2 O2; 3.321 | 97.7      | -0.34            | C22 H38 N2 O2 | 3.321   | 362.2933  | 362.2932  |

| Obs. m/z | Obs. RT | Obs. Mass | Tgt Formula   | Tgt Mass | Tgt Mass Error (ppm) | RT Diff.        | Find Cpds Algorithm |
|----------|---------|-----------|---------------|----------|----------------------|-----------------|---------------------|
| 363.3006 | 3.321   | 362.2932  | C22 H38 N2 O2 | 362.2933 | -0.34                | Find By Formula |                     |

## Compound Chromatograms

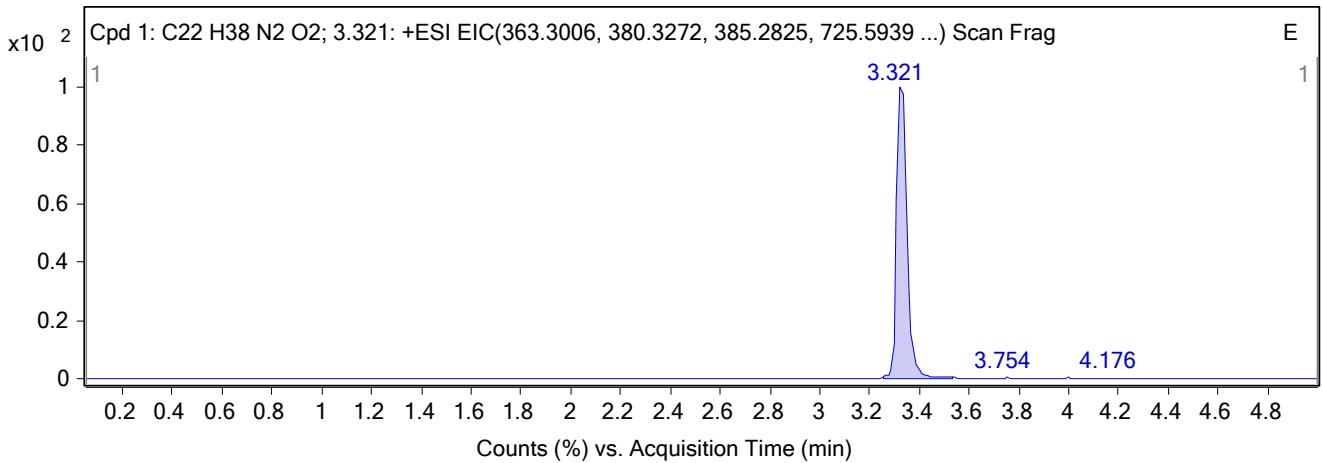

MS Zoomed Spectrum

# Target Compound Screening Report

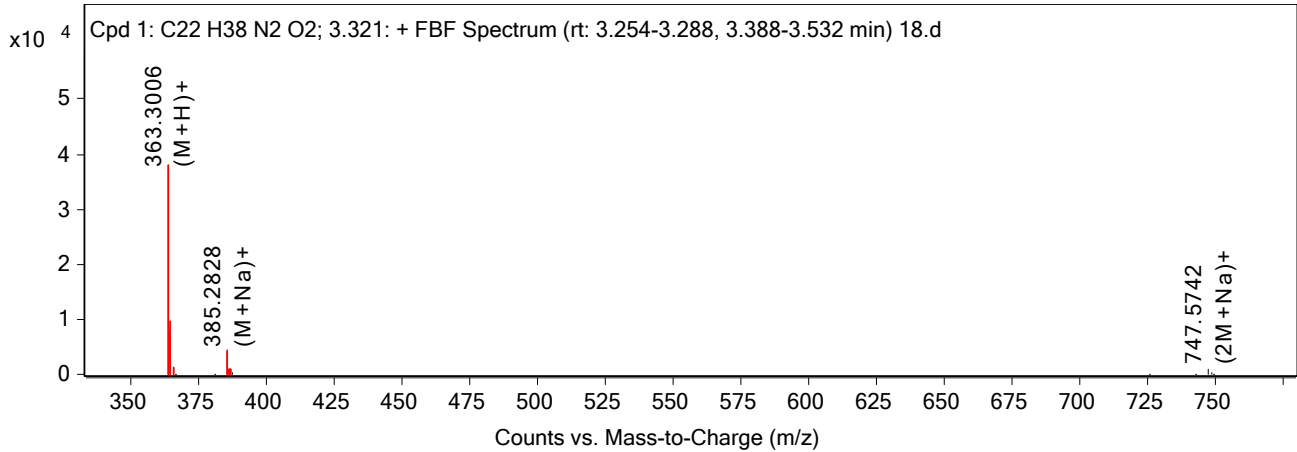

## MS Spectrum Peak List

| Obs. m/z | Charge | Abund    | Ion/Isotope |
|----------|--------|----------|-------------|
| 363.3006 | 1      | 37950.66 | (M+H)+      |
| 364.3039 | 1      | 8242.74  | (M+H)+      |
| 365.3048 | 1      | 1183.07  | (M+H)+      |
| 366.3031 | 1      | 167.22   | (M+H)+      |
| 385.2828 | 1      | 4117.02  | (M+Na)+     |
| 386.286  | 1      | 1048.16  | (M+Na)+     |
| 387.2843 | 1      | 236.5    | (M+Na)+     |
| 747.5742 | 1      | 944.49   | (2M+Na)+    |
| 748.578  | 1      | 475.91   | (2M+Na)+    |
| 749.5795 | 1      | 162.14   | (2M+Na)+    |

## MS Zoomed Spectrum

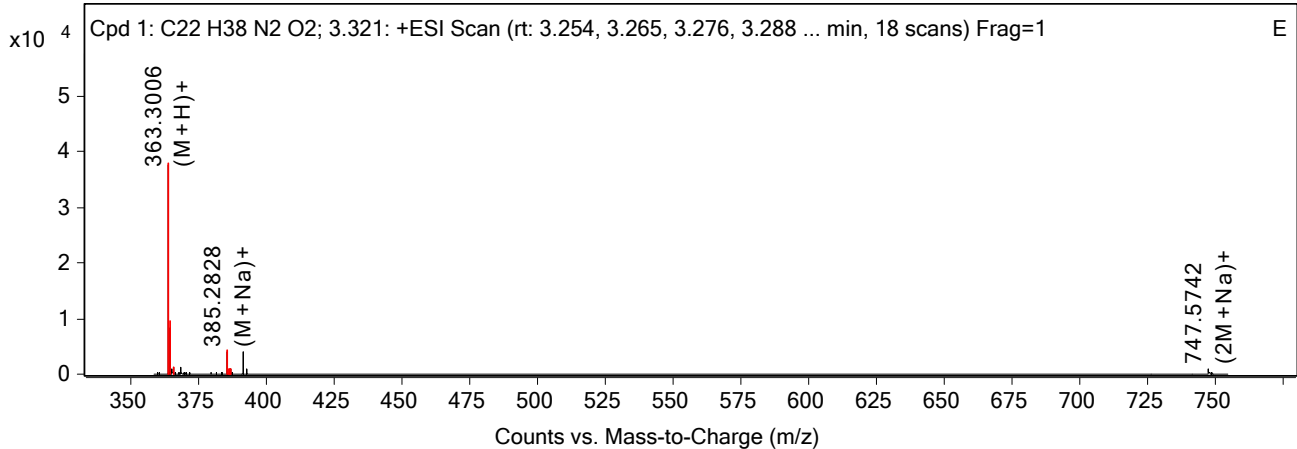

## MS Spectrum Peak List

| Obs. m/z | Charge | Abund    | Ion/Isotope | Tgt Mass Error (ppm) |
|----------|--------|----------|-------------|----------------------|
| 363.3006 | 1      | 37950.66 | (M+H)+      | -0.12                |
| 364.3039 | 1      | 8242.74  | (M+H)+      | -0.08                |
| 365.3048 | 1      | 1183.07  | (M+H)+      | 5.48                 |
| 366.3031 | 1      | 167.22   | (M+H)+      | 17.71                |
| 385.2828 | 1      | 4117.02  | (M+Na)+     | -0.66                |
| 386.286  | 1      | 1048.16  | (M+Na)+     | -0.48                |
| 387.2843 | 1      | 236.5    | (M+Na)+     | 11.49                |
| 747.5742 | 1      | 944.49   | (2M+Na)+    | 2.18                 |
| 748.578  | 1      | 475.91   | (2M+Na)+    | 1.41                 |
| 749.5795 | 1      | 162.14   | (2M+Na)+    | 3.54                 |

--- End Of Report ---

# Target Compound Screening Report

|                                 |                                        |                               |                                                     |
|---------------------------------|----------------------------------------|-------------------------------|-----------------------------------------------------|
| <b>Data File</b>                | 4-2.d                                  | <b>Sample Name</b>            | H2980753                                            |
| <b>Sample Type</b>              | Sample                                 | <b>Position</b>               | P1-A4                                               |
| <b>Instrument Name</b>          | Instrument 1                           | <b>User Name</b>              | Denis V.Bylina                                      |
| <b>Acq Method</b>               | Fast_Gradient_HRMS_pos_Lock_08272019.m | <b>Acquired Time</b>          | 9/24/2021 10:26:58 AM (UTC+03:00)                   |
| <b>IRM Calibration Status</b>   | Success                                | <b>DA Method</b>              | 1.m                                                 |
| <b>Comment</b>                  |                                        |                               |                                                     |
| <b>Sample Group</b>             |                                        | <b>Info.</b>                  | Agilent 6224 TOF LC/MS                              |
| <b>MFC</b>                      | C24H42N2O2                             | <b>Stream Name</b>            | LC 1                                                |
| <b>Acquisition Time (Local)</b> | 9/24/2021 10:26:58 AM (UTC+03:00)      | <b>Acquisition SW Version</b> | 6200 series TOF/6500 series Q-TOF B.08.00 (B8058.0) |
| <b>TOF Driver Version</b>       | 8.00.00                                | <b>TOF Firmware Version</b>   | 8.643                                               |
| <b>Tune Mass Range Max.</b>     | 1700                                   |                               |                                                     |

## Compound Table

| Label                       | Tgt Score | Mass Error (ppm) | Tgt Formula   | Obs. RT | Ref. Mass | Obs. Mass |
|-----------------------------|-----------|------------------|---------------|---------|-----------|-----------|
| Cpd 1: C24 H42 N2 O2; 3.631 | 95.36     | -2.58            | C24 H42 N2 O2 | 3.631   | 390.3246  | 390.3236  |

| Obs. m/z | Obs. RT | Obs. Mass | Tgt Formula   | Tgt Mass | Tgt Mass Error (ppm) | RT Diff.        | Find Cpd Algorithm |
|----------|---------|-----------|---------------|----------|----------------------|-----------------|--------------------|
| 413.313  | 3.631   | 390.3236  | C24 H42 N2 O2 | 390.3246 | -2.58                | Find By Formula |                    |

## Compound Chromatograms

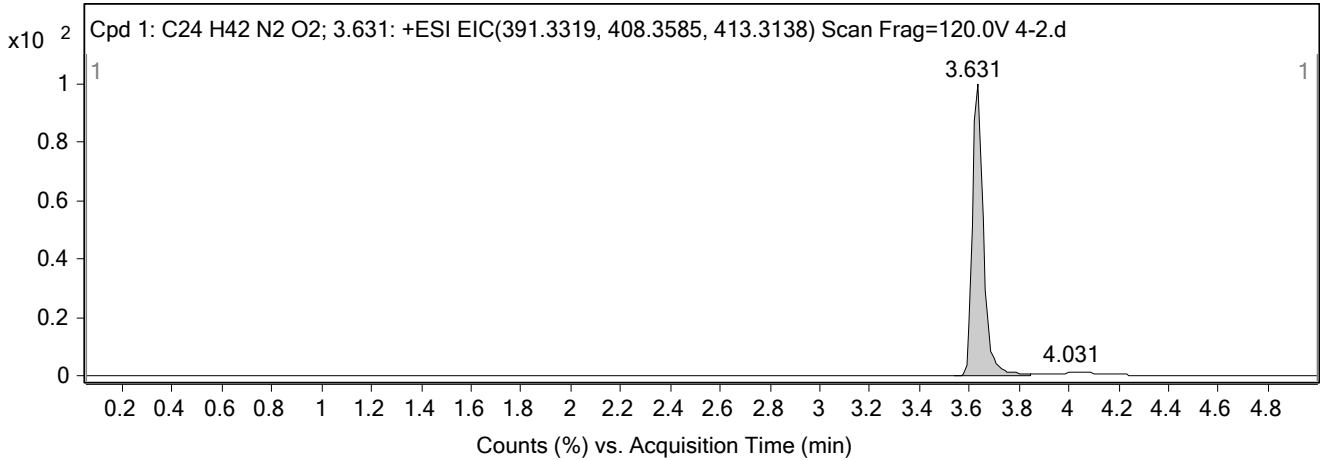

MS Zoomed Spectrum

# Target Compound Screening Report

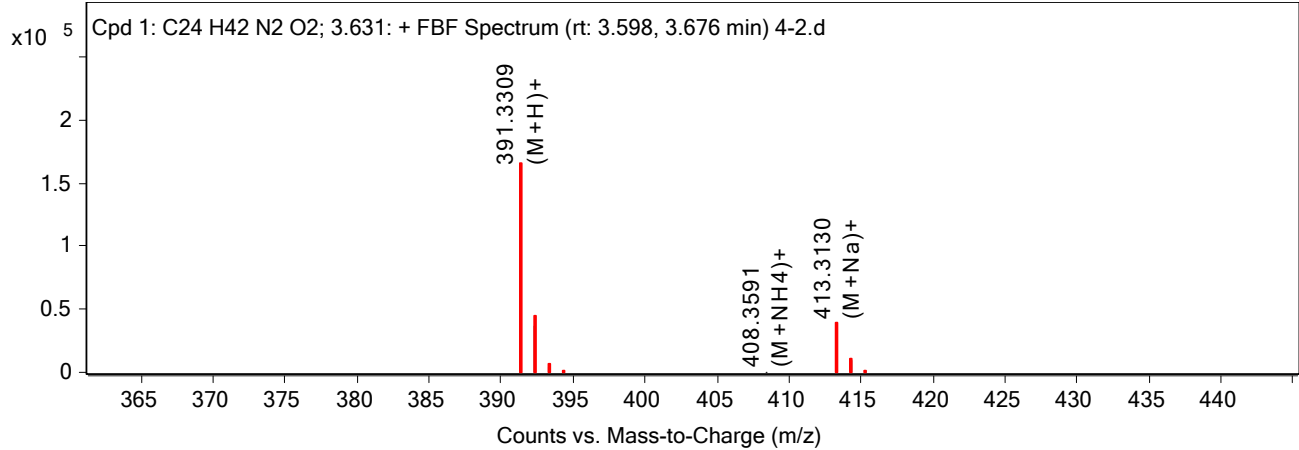

## MS Spectrum Peak List

| Obs. m/z | Charge | Abund    | Ion/Isotope           |
|----------|--------|----------|-----------------------|
| 391.3309 | 1      | 165707.5 | (M+H)+                |
| 392.3338 | 1      | 37082.18 | (M+H)+                |
| 393.3377 | 1      | 4610.06  | (M+H)+                |
| 394.3359 | 1      | 735.86   | (M+H)+                |
| 408.3591 | 1      | 184.18   | (M+NH <sub>4</sub> )+ |
| 413.313  | 1      | 38906.3  | (M+Na)+               |
| 414.3159 | 1      | 9269.09  | (M+Na)+               |
| 415.3208 | 1      | 1666.13  | (M+Na)+               |

## MS Zoomed Spectrum

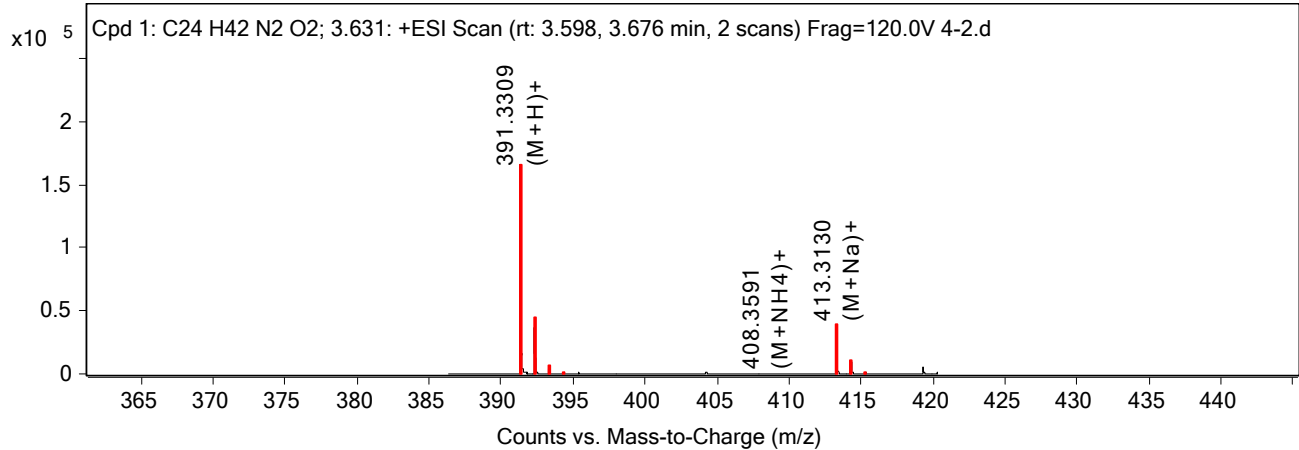

## MS Spectrum Peak List

| Obs. m/z | Charge | Abund    | Ion/Isotope           | Tgt Mass Error (ppm) |
|----------|--------|----------|-----------------------|----------------------|
| 391.3309 | 1      | 165707.5 | (M+H)+                | 2.48                 |
| 391.3309 |        | 165707.5 |                       |                      |
| 392.3338 | 1      | 37082.17 | (M+H)+                | 3.47                 |
| 393.3377 | 1      | 4610.06  | (M+H)+                | 1.24                 |
| 394.3359 | 1      | 735.86   | (M+H)+                | 12.93                |
| 408.3591 | 1      | 184.18   | (M+NH <sub>4</sub> )+ | -1.56                |
| 413.313  | 1      | 38906.31 | (M+Na)+               | 2.05                 |
| 414.3159 | 1      | 9269.09  | (M+Na)+               | 2.79                 |
| 415.3208 | 1      | 1666.13  | (M+Na)+               | -1.75                |

--- End Of Report ---

# Target Compound Screening Report

|                                 |                                        |                               |                                                     |
|---------------------------------|----------------------------------------|-------------------------------|-----------------------------------------------------|
| <b>Data File</b>                | 16.d                                   | <b>Sample Name</b>            | H2986293                                            |
| <b>Sample Type</b>              | Sample                                 | <b>Position</b>               | P1-B7                                               |
| <b>Instrument Name</b>          | Instrument 1                           | <b>User Name</b>              | Denis V.Bylina                                      |
| <b>Acq Method</b>               | Fast_Gradient_HRMS_pos_Lock_08272019.m | <b>Acquired Time</b>          | 9/22/2021 3:11:13 PM (UTC+03:00)                    |
| <b>IRM Calibration Status</b>   | Success                                | <b>DA Method</b>              | 1.m                                                 |
| <b>Comment</b>                  |                                        |                               |                                                     |
| <b>Sample Group</b>             |                                        | <b>Info.</b>                  | Agilent 6224 TOF LC/MS                              |
| <b>MFC</b>                      | C22H38N2O2                             | <b>Stream Name</b>            | LC 1                                                |
| <b>Acquisition Time (Local)</b> | 9/22/2021 3:11:13 PM (UTC+03:00)       | <b>Acquisition SW Version</b> | 6200 series TOF/6500 series Q-TOF B.08.00 (B8058.0) |
| <b>TOF Driver Version</b>       | 8.00.00                                | <b>TOF Firmware Version</b>   | 8.643                                               |
| <b>Tune Mass Range Max.</b>     | 1700                                   |                               |                                                     |

## Compound Table

| Label                       | Tgt Score | Mass Error (ppm) | Tgt Formula   | Obs. RT | Ref. Mass | Obs. Mass |
|-----------------------------|-----------|------------------|---------------|---------|-----------|-----------|
| Cpd 1: C22 H38 N2 O2; 3.348 | 97.21     | -0.25            | C22 H38 N2 O2 | 3.348   | 362.2933  | 362.2932  |

| Obs. m/z | Obs. RT | Obs. Mass | Tgt Formula   | Tgt Mass | Tgt Mass Error (ppm) | RT Diff.        | Find Cps Algorithm |
|----------|---------|-----------|---------------|----------|----------------------|-----------------|--------------------|
| 363.3006 | 3.348   | 362.2932  | C22 H38 N2 O2 | 362.2933 | -0.25                | Find By Formula |                    |

## Compound Chromatograms

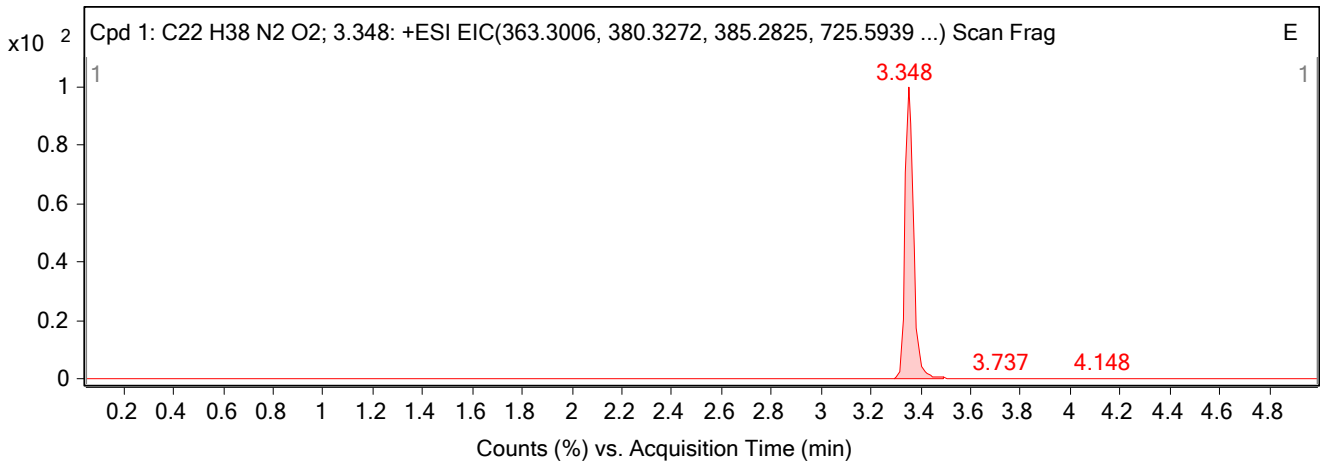

MS Zoomed Spectrum

# Target Compound Screening Report

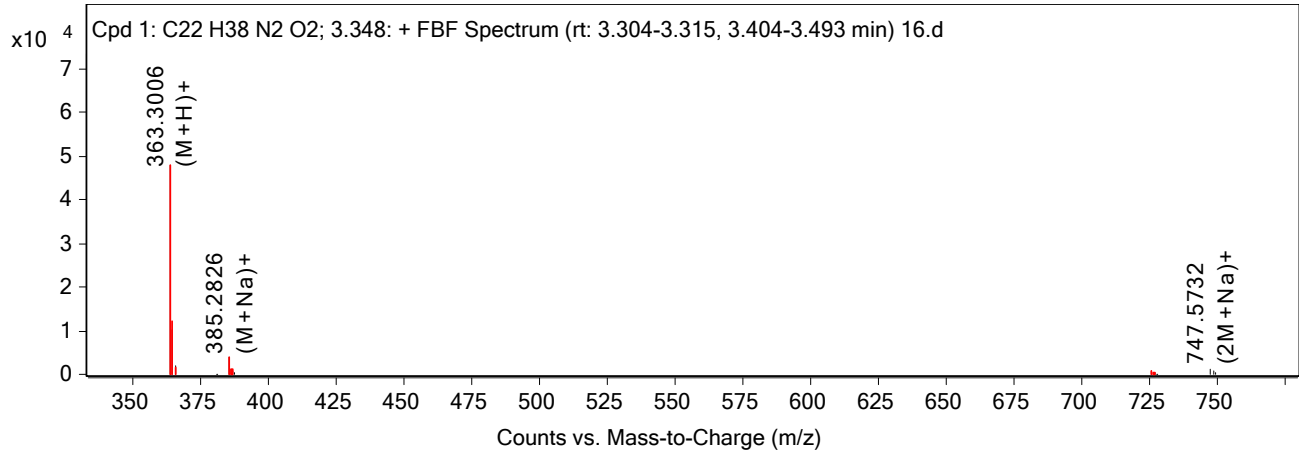

## MS Spectrum Peak List

| Obs. m/z | Charge | Abund    | Ion/Isotope |
|----------|--------|----------|-------------|
| 363.3006 | 1      | 47887.86 | (M+H)+      |
| 364.3038 | 1      | 10303.15 | (M+H)+      |
| 365.3085 | 1      | 1855.27  | (M+H)+      |
| 385.2826 | 1      | 3929.68  | (M+Na)+     |
| 386.2868 | 1      | 970.68   | (M+Na)+     |
| 387.2885 | 1      | 288.41   | (M+Na)+     |
| 725.5925 | 1      | 741.21   | (2M+H)+     |
| 726.5945 | 1      | 454.63   | (2M+H)+     |
| 747.5732 | 1      | 1264.37  | (2M+Na)+    |
| 748.5762 | 1      | 629.96   | (2M+Na)+    |

## MS Zoomed Spectrum

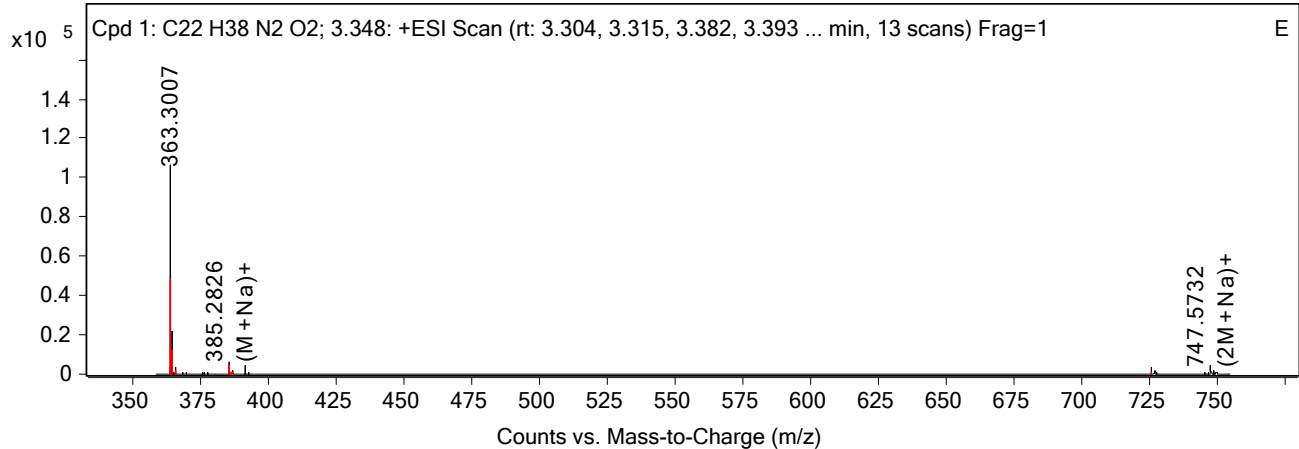

## MS Spectrum Peak List

| Obs. m/z | Charge | Abund    | Ion/Isotope | Tgt Mass Error (ppm) |
|----------|--------|----------|-------------|----------------------|
| 363.3006 | 1      | 47887.85 | (M+H)+      | -0.04                |
| 364.3038 | 1      | 10303.15 | (M+H)+      | 0.17                 |
| 365.3085 | 1      | 1855.27  | (M+H)+      | -4.8                 |
| 385.2826 | 1      | 3929.68  | (M+Na)+     | -0.26                |
| 386.2868 | 1      | 970.68   | (M+Na)+     | -2.78                |
| 387.2885 | 1      | 288.41   | (M+Na)+     | 0.62                 |
| 725.5925 | 1      | 741.21   | (2M+H)+     | 2.02                 |
| 726.5945 | 1      | 454.63   | (2M+H)+     | 3.61                 |
| 747.5732 | 1      | 1264.37  | (2M+Na)+    | 3.58                 |
| 748.5762 | 1      | 629.96   | (2M+Na)+    | 3.85                 |

--- End Of Report ---



# Target Compound Screening Report

|                                 |                                        |                               |                                                     |
|---------------------------------|----------------------------------------|-------------------------------|-----------------------------------------------------|
| <b>Data File</b>                | 24.d                                   | <b>Sample Name</b>            | H2987842                                            |
| <b>Sample Type</b>              | Sample                                 | <b>Position</b>               | P1-C6                                               |
| <b>Instrument Name</b>          | Instrument 1                           | <b>User Name</b>              | Denis V.Bylina                                      |
| <b>Acq Method</b>               | Fast_Gradient_HRMS_pos_Lock_08272019.m | <b>Acquired Time</b>          | 9/24/2021 12:45:00 PM (UTC+03:00)                   |
| <b>IRM Calibration Status</b>   | Success                                | <b>DA Method</b>              | 1.m                                                 |
| <b>Comment</b>                  |                                        |                               |                                                     |
| <b>Sample Group</b>             |                                        | <b>Info.</b>                  | Agilent 6224 TOF LC/MS                              |
| <b>MFC</b>                      | C23H40N2O2                             | <b>Stream Name</b>            | LC 1                                                |
| <b>Acquisition Time (Local)</b> | 9/24/2021 12:45:00 PM (UTC+03:00)      | <b>Acquisition SW Version</b> | 6200 series TOF/6500 series Q-TOF B.08.00 (B8058.0) |
| <b>TOF Driver Version</b>       | 8.00.00                                | <b>TOF Firmware Version</b>   | 8.643                                               |
| <b>Tune Mass Range Max.</b>     | 1700                                   |                               |                                                     |

## Compound Table

| Label                       | Tgt Score | Mass Error (ppm) | Tgt Formula   | Obs. RT | Ref. Mass | Obs. Mass |
|-----------------------------|-----------|------------------|---------------|---------|-----------|-----------|
| Cpd 1: C23 H40 N2 O2; 3.287 | 96.01     | -2.23            | C23 H40 N2 O2 | 3.287   | 376.309   | 376.3081  |

| Obs. m/z | Obs. RT | Obs. Mass | Tgt Formula   | Tgt Mass | Tgt Mass Error (ppm) | RT Diff.        | Find Cpds Algorithm |
|----------|---------|-----------|---------------|----------|----------------------|-----------------|---------------------|
| 377.3155 | 3.287   | 376.3081  | C23 H40 N2 O2 | 376.309  | -2.23                | Find By Formula |                     |

## Compound Chromatograms

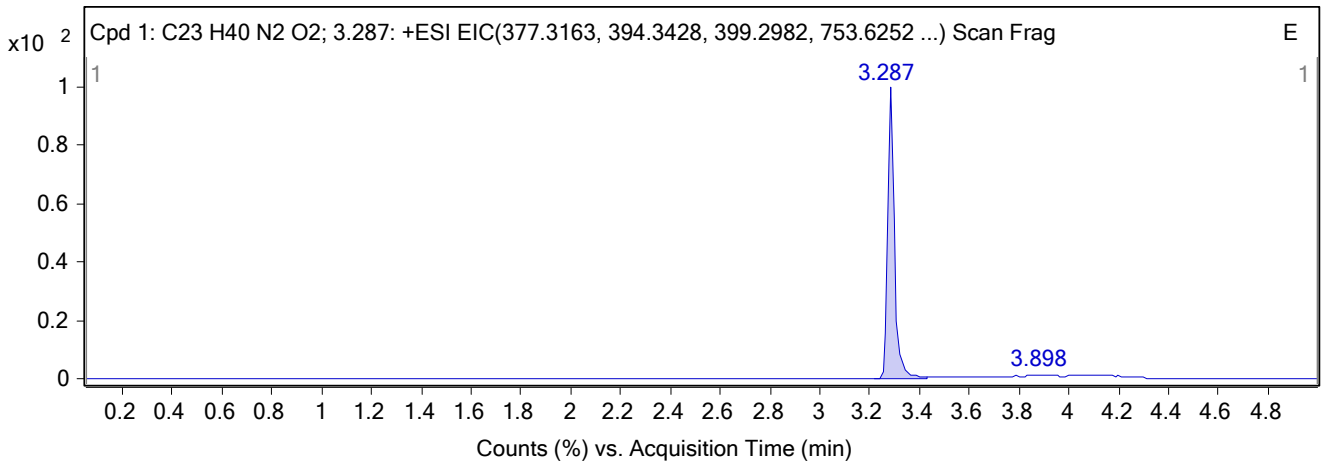

MS Zoomed Spectrum

# Target Compound Screening Report

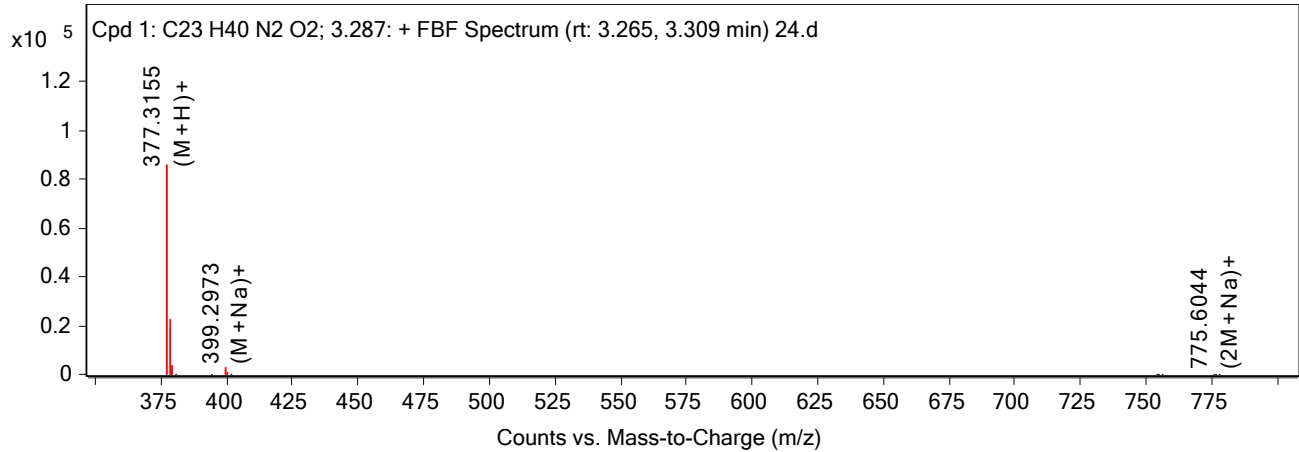

### MS Spectrum Peak List

| Obs. m/z | Charge | Abund    | Ion/Isotope |
|----------|--------|----------|-------------|
| 377.3155 | 1      | 85542.08 | (M+H)+      |
| 378.3188 | 1      | 18818.13 | (M+H)+      |
| 379.3219 | 1      | 2489.17  | (M+H)+      |
| 380.3247 | 1      | 245.07   | (M+H)+      |
| 399.2973 | 1      | 2521.12  | (M+Na)+     |
| 400.2993 | 1      | 815.44   | (M+Na)+     |
| 401.2943 | 1      | 218.01   | (M+Na)+     |
| 753.6175 | 1      | 162.61   | (2M+H)+     |
| 775.6044 | 1      | 384.5    | (2M+Na)+    |
| 776.6032 | 1      | 205.69   | (2M+Na)+    |

### MS Zoomed Spectrum

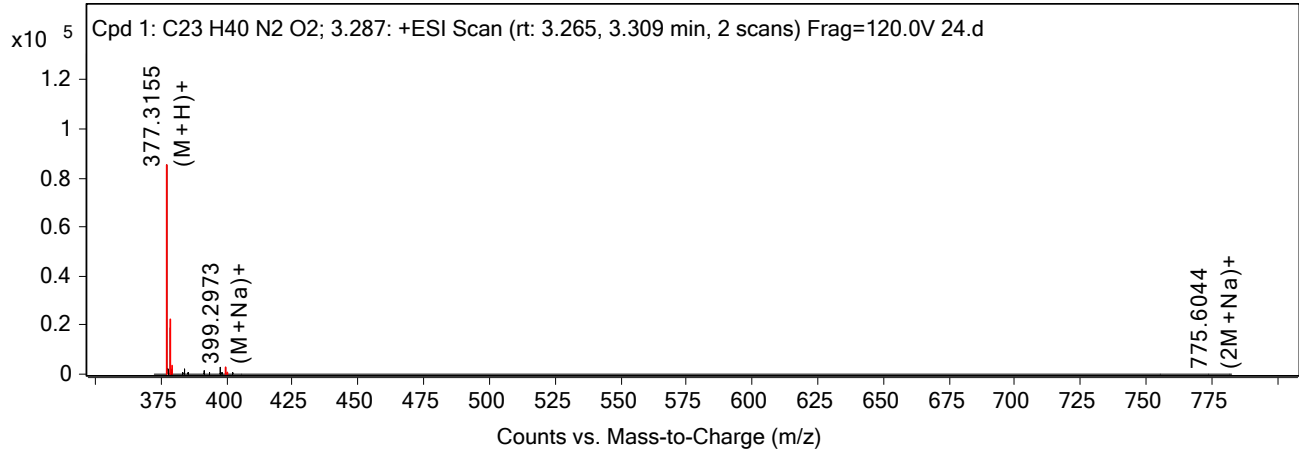

### MS Spectrum Peak List

| Obs. m/z | Charge | Abund    | Ion/Isotope | Tgt Mass Error (ppm) |
|----------|--------|----------|-------------|----------------------|
| 377.3155 | 1      | 85542.08 | (M+H)+      | 2.08                 |
| 378.3188 | 1      | 18818.13 | (M+H)+      | 1.95                 |
| 379.3219 | 1      | 2489.17  | (M+H)+      | 1.63                 |
| 380.3247 | 1      | 245.07   | (M+H)+      | 1.64                 |
| 399.2973 | 1      | 2521.12  | (M+Na)+     | 2.23                 |
| 400.2993 | 1      | 815.44   | (M+Na)+     | 5.27                 |
| 401.2943 | 1      | 218.01   | (M+Na)+     | 25.13                |
| 753.6175 | 1      | 162.61   | (2M+H)+     | 10.31                |
| 775.6044 | 1      | 384.5    | (2M+Na)+    | 3.62                 |
| 776.6032 | 1      | 205.69   | (2M+Na)+    | 9.34                 |

--- End Of Report ---

# Target Compound Screening Report

|                                 |                                        |                               |                                                     |
|---------------------------------|----------------------------------------|-------------------------------|-----------------------------------------------------|
| <b>Data File</b>                | 7.d                                    | <b>Sample Name</b>            | H2990491                                            |
| <b>Sample Type</b>              | Sample                                 | <b>Position</b>               | P1-A7                                               |
| <b>Instrument Name</b>          | Instrument 1                           | <b>User Name</b>              | Denis V.Bylina                                      |
| <b>Acq Method</b>               | Fast_Gradient_HRMS_pos_Lock_08272019.m | <b>Acquired Time</b>          | 10/7/2021 5:15:06 PM (UTC+03:00)                    |
| <b>IRM Calibration Status</b>   | Success                                | <b>DA Method</b>              | 1.m                                                 |
| <b>Comment</b>                  |                                        |                               |                                                     |
| <b>Sample Group</b>             |                                        | <b>Info.</b>                  | Agilent 6224 TOF LC/MS                              |
| <b>MFC</b>                      | C24H42N2O2                             | <b>Stream Name</b>            | LC 1                                                |
| <b>Acquisition Time (Local)</b> | 10/7/2021 5:15:06 PM (UTC+03:00)       | <b>Acquisition SW Version</b> | 6200 series TOF/6500 series Q-TOF B.08.00 (B8058.0) |
| <b>TOF Driver Version</b>       | 8.00.00                                | <b>TOF Firmware Version</b>   | 8.643                                               |
| <b>Tune Mass Range Max.</b>     | 1700                                   |                               |                                                     |

## Compound Table

| Label                       | Tgt Score | Mass Error (ppm) | Tgt Formula   | Obs. RT | Ref. Mass | Obs. Mass |
|-----------------------------|-----------|------------------|---------------|---------|-----------|-----------|
| Cpd 1: C24 H42 N2 O2; 3.647 | 95.34     | -0.75            | C24 H42 N2 O2 | 3.647   | 390.3246  | 390.3243  |

| Obs. m/z | Obs. RT | Obs. Mass | Tgt Formula   | Tgt Mass | Tgt Mass Error (ppm) | RT Diff.        | Find Cps Algorithm |
|----------|---------|-----------|---------------|----------|----------------------|-----------------|--------------------|
| 391.3313 | 3.647   | 390.3243  | C24 H42 N2 O2 | 390.3246 | -0.75                | Find By Formula |                    |

## Compound Chromatograms

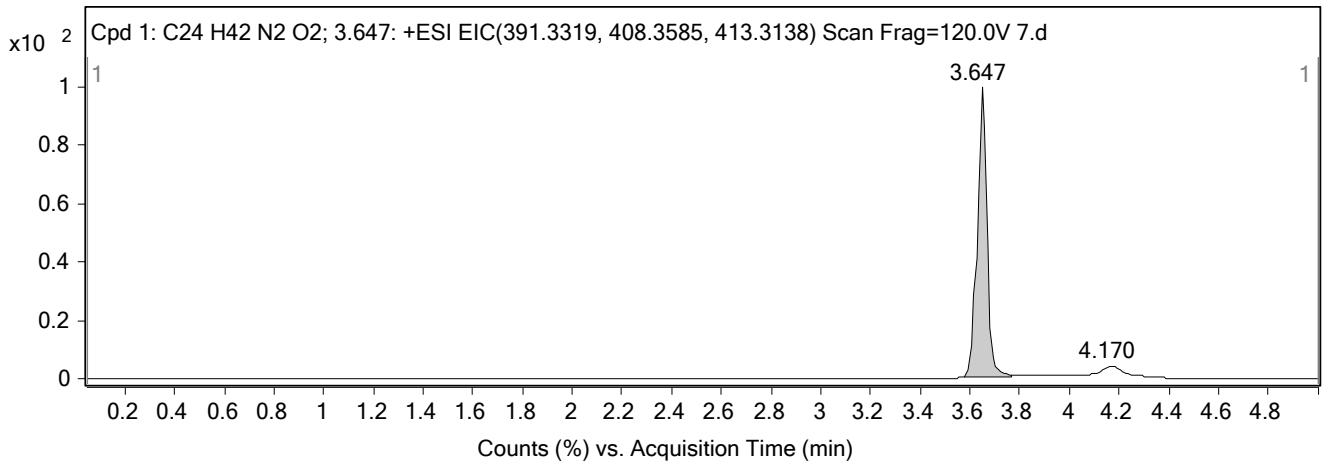

MS Zoomed Spectrum

# Target Compound Screening Report

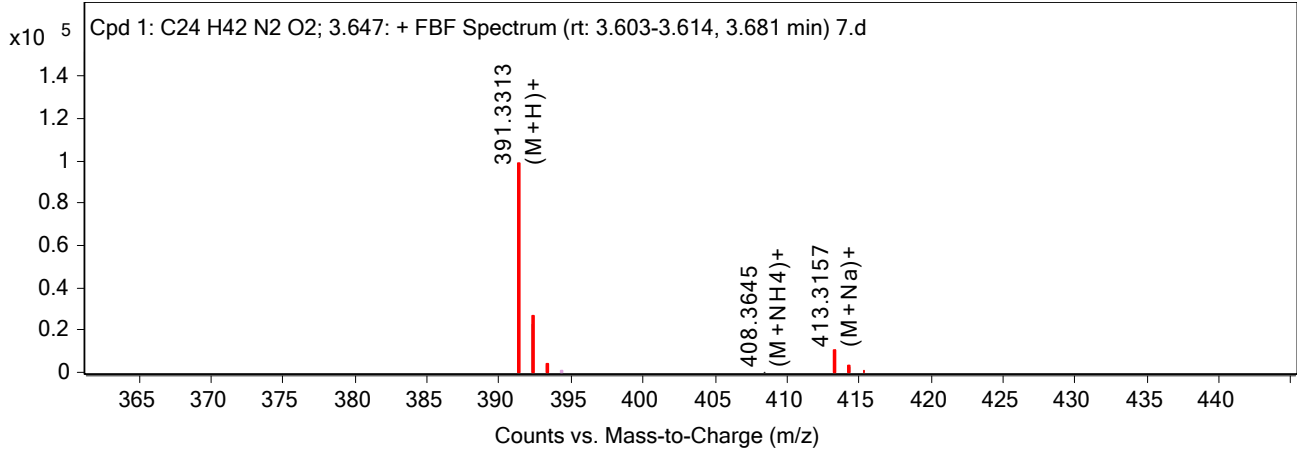

## MS Spectrum Peak List

| Obs. m/z | Charge | Abund    | Ion/Isotope           |
|----------|--------|----------|-----------------------|
| 391.3313 | 1      | 98789.72 | (M+H)+                |
| 392.3346 | 1      | 22481.72 | (M+H)+                |
| 393.3358 | 1      | 3314.95  | (M+H)+                |
| 408.3645 | 1      | 225.44   | (M+NH <sub>4</sub> )+ |
| 413.3157 | 1      | 10243.92 | (M+Na)+               |
| 414.3238 | 1      | 2865.45  | (M+Na)+               |
| 415.3151 | 1      | 793.69   | (M+Na)+               |

## MS Zoomed Spectrum

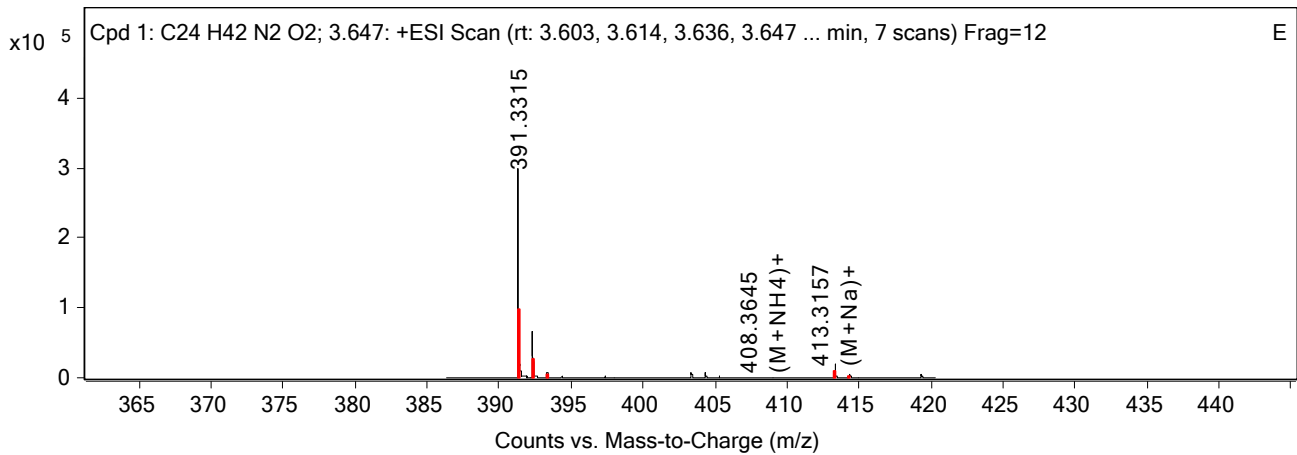

## MS Spectrum Peak List

| Obs. m/z | Charge | Abund     | Ion/Isotope           | Tgt Mass Error (ppm) |
|----------|--------|-----------|-----------------------|----------------------|
| 391.3313 | 1      | 98789.72  | (M+H)+                | 1.43                 |
| 391.3315 |        | 298853.51 |                       |                      |
| 392.3346 | 1      | 22481.72  | (M+H)+                | 1.45                 |
| 393.3358 | 1      | 3314.95   | (M+H)+                | 6.06                 |
| 408.3645 | 1      | 225.44    | (M+NH <sub>4</sub> )+ | -14.85               |
| 413.3157 | 1      | 10243.93  | (M+Na)+               | -4.48                |
| 414.3238 | 1      | 2865.45   | (M+Na)+               | -16.1                |
| 415.3151 | 1      | 793.69    | (M+Na)+               | 11.94                |

--- End Of Report ---

# Target Compound Screening Report

|                                 |                                        |                               |                                                     |
|---------------------------------|----------------------------------------|-------------------------------|-----------------------------------------------------|
| <b>Data File</b>                | 16-5.d                                 | <b>Sample Name</b>            | H2986295                                            |
| <b>Sample Type</b>              | Sample                                 | <b>Position</b>               | P1-B7                                               |
| <b>Instrument Name</b>          | Instrument 1                           | <b>User Name</b>              | Denis V.Bylina                                      |
| <b>Acq Method</b>               | Fast_Gradient_HRMS_pos_Lock_08272019.m | <b>Acquired Time</b>          | 9/23/2021 4:33:24 PM (UTC+03:00)                    |
| <b>IRM Calibration Status</b>   | Success                                | <b>DA Method</b>              | 1.m                                                 |
| <b>Comment</b>                  |                                        |                               |                                                     |
| <b>Sample Group</b>             |                                        | <b>Info.</b>                  | Agilent 6224 TOF LC/MS                              |
| <b>MFC</b>                      | C23H40N2O2                             | <b>Stream Name</b>            | LC 1                                                |
| <b>Acquisition Time (Local)</b> | 9/23/2021 4:33:24 PM (UTC+03:00)       | <b>Acquisition SW Version</b> | 6200 series TOF/6500 series Q-TOF B.08.00 (B8058.0) |
| <b>TOF Driver Version</b>       | 8.00.00                                | <b>TOF Firmware Version</b>   | 8.643                                               |
| <b>Tune Mass Range Max.</b>     | 1700                                   |                               |                                                     |

## Compound Table

| Label                       | Tgt Score | Mass Error (ppm) | Tgt Formula   | Obs. RT | Ref. Mass | Obs. Mass |
|-----------------------------|-----------|------------------|---------------|---------|-----------|-----------|
| Cpd 1: C23 H40 N2 O2; 3.458 | 96.06     | 0.65             | C23 H40 N2 O2 | 3.458   | 376.309   | 376.3092  |

| Obs. m/z | Obs. RT | Obs. Mass | Tgt Formula   | Tgt Mass | Tgt Mass Error (ppm) | RT Diff.        | Find Cpd Algorithm |
|----------|---------|-----------|---------------|----------|----------------------|-----------------|--------------------|
| 377.3152 | 3.458   | 376.3092  | C23 H40 N2 O2 | 376.309  | 0.65                 | Find By Formula |                    |

## Compound Chromatograms

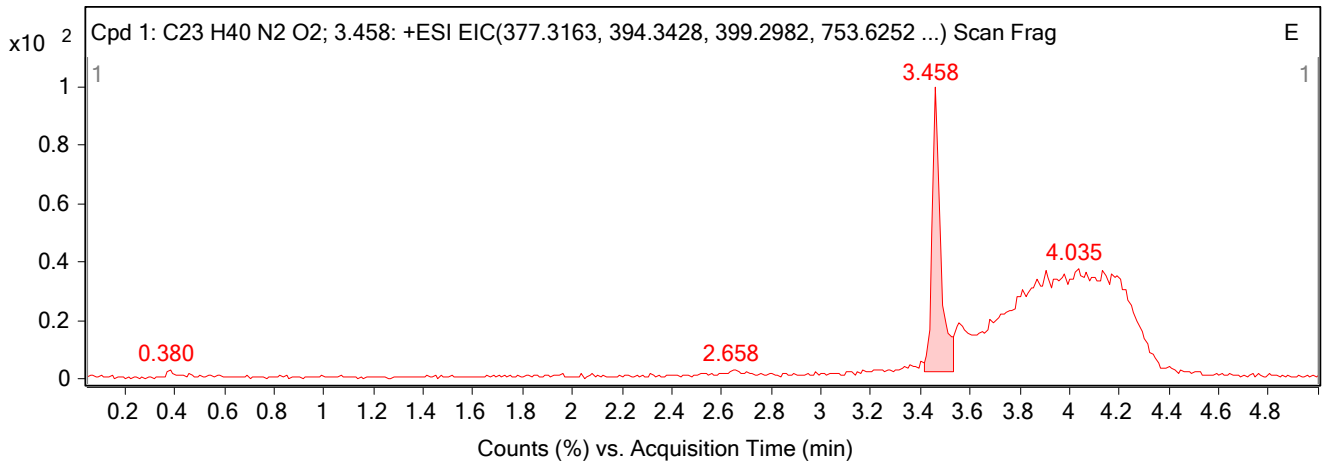

MS Zoomed Spectrum

# Target Compound Screening Report

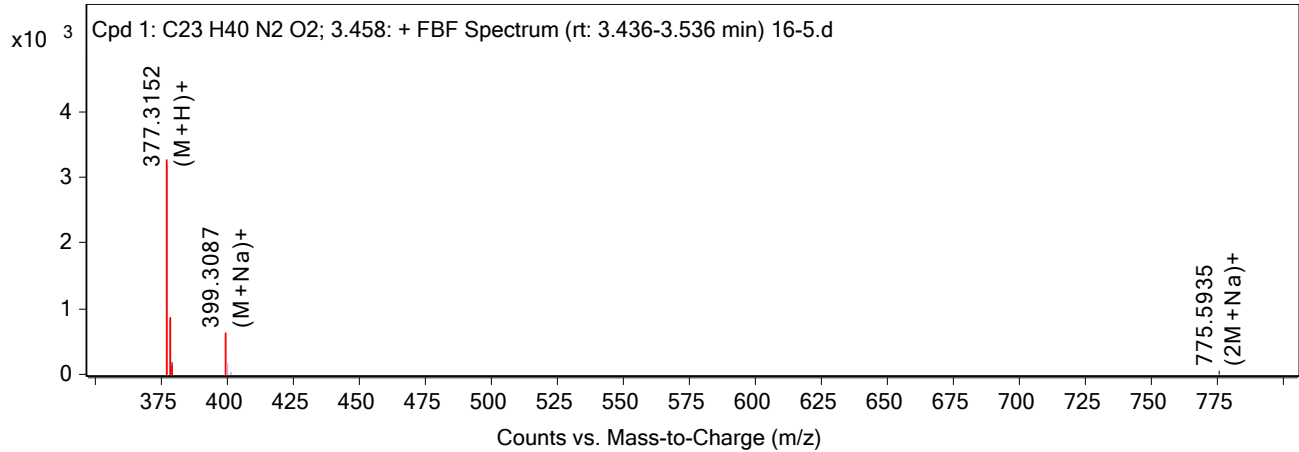

## MS Spectrum Peak List

| Obs. m/z | Charge | Abund   | Ion/Isotope |
|----------|--------|---------|-------------|
| 377.3152 | 1      | 3200.99 | (M+H)+      |
| 378.319  | 1      | 845.65  | (M+H)+      |
| 379.3186 | 1      | 190.26  | (M+H)+      |
| 399.3087 | 1      | 633.02  | (M+Na)+     |
| 775.5935 | 1      | 62.1    | (2M+Na)+    |

## MS Zoomed Spectrum

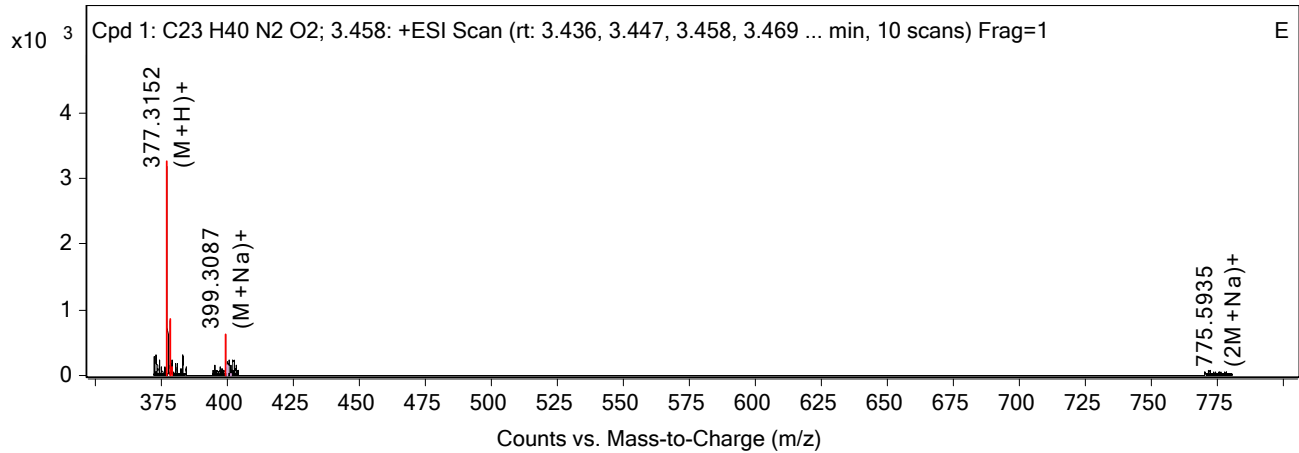

## MS Spectrum Peak List

| Obs. m/z | Charge | Abund   | Ion/Isotope | Tgt Mass Error (ppm) |
|----------|--------|---------|-------------|----------------------|
| 377.3152 | 1      | 3200.99 | (M+H)+      | 2.86                 |
| 378.319  | 1      | 845.65  | (M+H)+      | 1.22                 |
| 379.3186 | 1      | 190.26  | (M+H)+      | 10.19                |
| 399.3087 | 1      | 633.02  | (M+Na)+     | -26.25               |
| 775.5935 | 1      | 62.1    | (2M+Na)+    | 17.6                 |

--- End Of Report ---

# Target Compound Screening Report

|                                 |                                        |                               |                                                     |
|---------------------------------|----------------------------------------|-------------------------------|-----------------------------------------------------|
| <b>Data File</b>                | 15.d                                   | <b>Sample Name</b>            | H2987844                                            |
| <b>Sample Type</b>              | Sample                                 | <b>Position</b>               | P1-B6                                               |
| <b>Instrument Name</b>          | Instrument 1                           | <b>User Name</b>              | Denis V.Bylina                                      |
| <b>Acq Method</b>               | Fast_Gradient_HRMS_pos_Lock_08272019.m | <b>Acquired Time</b>          | 9/22/2021 3:05:40 PM (UTC+03:00)                    |
| <b>IRM Calibration Status</b>   | Success                                | <b>DA Method</b>              | 1.m                                                 |
| <b>Comment</b>                  |                                        |                               |                                                     |
| <b>Sample Group</b>             |                                        | <b>Info.</b>                  | Agilent 6224 TOF LC/MS                              |
| <b>MFC</b>                      | C23H40N2O2                             | <b>Stream Name</b>            | LC 1                                                |
| <b>Acquisition Time (Local)</b> | 9/22/2021 3:05:40 PM (UTC+03:00)       | <b>Acquisition SW Version</b> | 6200 series TOF/6500 series Q-TOF B.08.00 (B8058.0) |
| <b>TOF Driver Version</b>       | 8.00.00                                | <b>TOF Firmware Version</b>   | 8.643                                               |
| <b>Tune Mass Range Max.</b>     | 1700                                   |                               |                                                     |

## Compound Table

| Label                       | Tgt Score | Mass Error (ppm) | Tgt Formula   | Obs. RT | Ref. Mass | Obs. Mass |
|-----------------------------|-----------|------------------|---------------|---------|-----------|-----------|
| Cpd 1: C23 H40 N2 O2; 3.562 | 93.82     | -0.95            | C23 H40 N2 O2 | 3.562   | 376.309   | 376.3086  |

| Obs. m/z | Obs. RT | Obs. Mass | Tgt Formula   | Tgt Mass | Tgt Mass Error (ppm) | RT Diff.        | Find Cpd Algorithm |
|----------|---------|-----------|---------------|----------|----------------------|-----------------|--------------------|
| 377.3159 | 3.562   | 376.3086  | C23 H40 N2 O2 | 376.309  | -0.95                | Find By Formula |                    |

## Compound Chromatograms

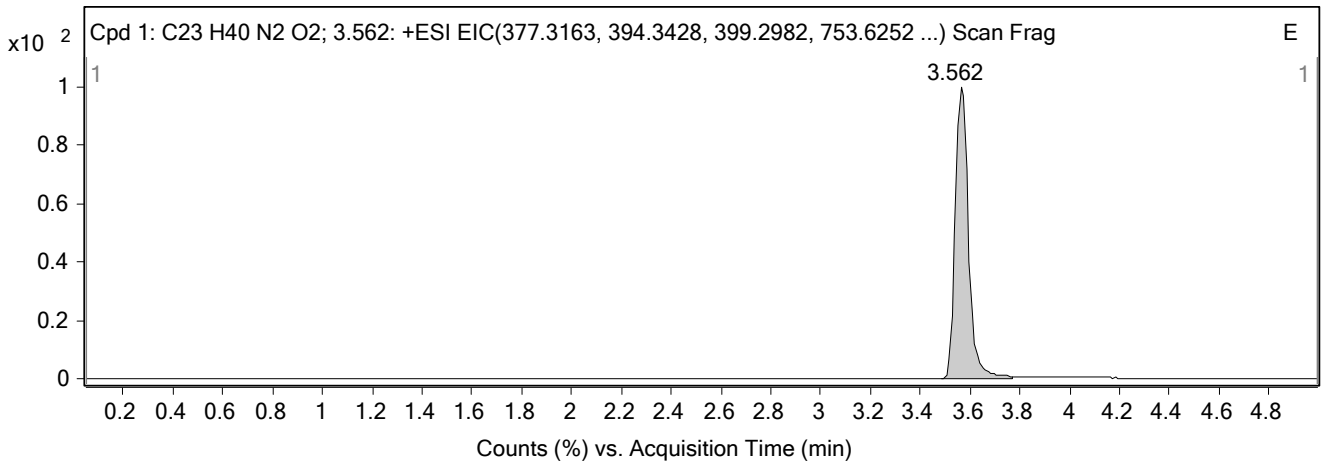

MS Zoomed Spectrum

# Target Compound Screening Report

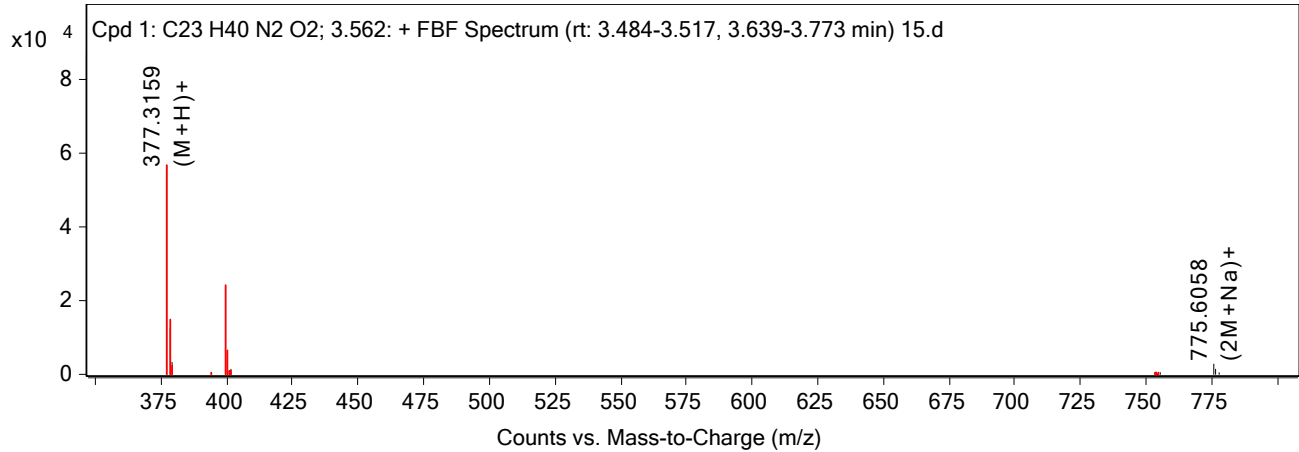

## MS Spectrum Peak List

| Obs. m/z | Charge | Abund    | Ion/Isotope |
|----------|--------|----------|-------------|
| 377.3159 | 1      | 56735.79 | (M+H)+      |
| 378.3192 | 1      | 12484.55 | (M+H)+      |
| 379.3266 | 1      | 3094.38  | (M+H)+      |
| 399.298  | 1      | 24281.5  | (M+Na)+     |
| 400.301  | 1      | 5641.24  | (M+Na)+     |
| 401.3096 | 1      | 1526.26  | (M+Na)+     |
| 754.6242 | 1      | 302.18   | (2M+H)+     |
| 775.6058 | 1      | 2665.99  | (2M+Na)+    |
| 776.6059 | 1      | 1493.38  | (2M+Na)+    |
| 777.6086 | 1      | 613.83   | (2M+Na)+    |

## MS Zoomed Spectrum

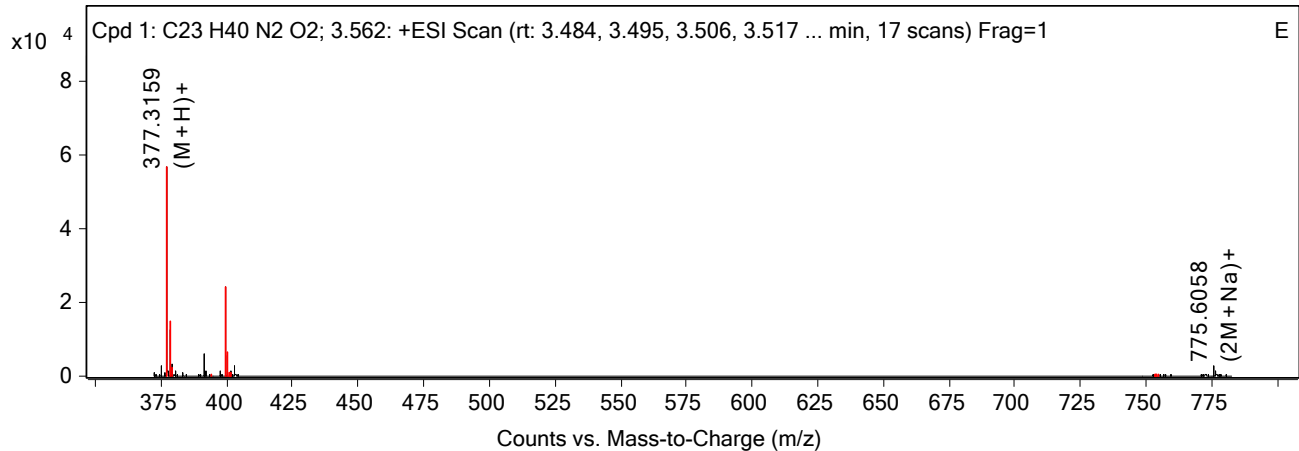

## MS Spectrum Peak List

| Obs. m/z | Charge | Abund    | Ion/Isotope | Tgt Mass Error (ppm) |
|----------|--------|----------|-------------|----------------------|
| 377.3159 | 1      | 56735.79 | (M+H)+      | 0.95                 |
| 378.3192 | 1      | 12484.55 | (M+H)+      | 0.83                 |
| 379.3266 | 1      | 3094.38  | (M+H)+      | -10.91               |
| 399.298  | 1      | 24281.5  | (M+Na)+     | 0.59                 |
| 400.301  | 1      | 5641.24  | (M+Na)+     | 0.98                 |
| 401.3096 | 1      | 1526.26  | (M+Na)+     | -13                  |
| 754.6242 | 1      | 302.18   | (2M+H)+     | 5.7                  |
| 775.6058 | 1      | 2665.99  | (2M+Na)+    | 1.77                 |
| 776.6059 | 1      | 1493.38  | (2M+Na)+    | 5.8                  |
| 777.6086 | 1      | 613.83   | (2M+Na)+    | 6.26                 |

--- End Of Report ---



# Target Compound Screening Report

|                                 |                                        |                               |                                                     |
|---------------------------------|----------------------------------------|-------------------------------|-----------------------------------------------------|
| <b>Data File</b>                | 20.d                                   | <b>Sample Name</b>            | H2986947                                            |
| <b>Sample Type</b>              | Sample                                 | <b>Position</b>               | P1-C2                                               |
| <b>Instrument Name</b>          | Instrument 1                           | <b>User Name</b>              | Denis V.Bylina                                      |
| <b>Acq Method</b>               | Fast_Gradient_HRMS_pos_Lock_08272019.m | <b>Acquired Time</b>          | 9/24/2021 12:04:18 PM (UTC+03:00)                   |
| <b>IRM Calibration Status</b>   | Success                                | <b>DA Method</b>              | 1.m                                                 |
| <b>Comment</b>                  |                                        |                               |                                                     |
| <b>Sample Group</b>             |                                        | <b>Info.</b>                  | Agilent 6224 TOF LC/MS                              |
| <b>MFC</b>                      | C24H42N2O2                             | <b>Stream Name</b>            | LC 1                                                |
| <b>Acquisition Time (Local)</b> | 9/24/2021 12:04:18 PM (UTC+03:00)      | <b>Acquisition SW Version</b> | 6200 series TOF/6500 series Q-TOF B.08.00 (B8058.0) |
| <b>TOF Driver Version</b>       | 8.00.00                                | <b>TOF Firmware Version</b>   | 8.643                                               |
| <b>Tune Mass Range Max.</b>     | 1700                                   |                               |                                                     |

### Compound Table

| Label                       | Tgt Score | Mass Error (ppm) | Tgt Formula   | Obs. RT | Ref. Mass | Obs. Mass |
|-----------------------------|-----------|------------------|---------------|---------|-----------|-----------|
| Cpd 1: C24 H42 N2 O2; 3.644 | 98.34     | -2.49            | C24 H42 N2 O2 | 3.644   | 390.3246  | 390.3237  |

| Obs. m/z | Obs. RT | Obs. Mass | Tgt Formula   | Tgt Mass | Tgt Mass Error (ppm) | RT Diff.        | Find Cpds Algorithm |
|----------|---------|-----------|---------------|----------|----------------------|-----------------|---------------------|
| 803.6372 | 3.644   | 390.3237  | C24 H42 N2 O2 | 390.3246 | -2.49                | Find By Formula |                     |

### Compound Chromatograms

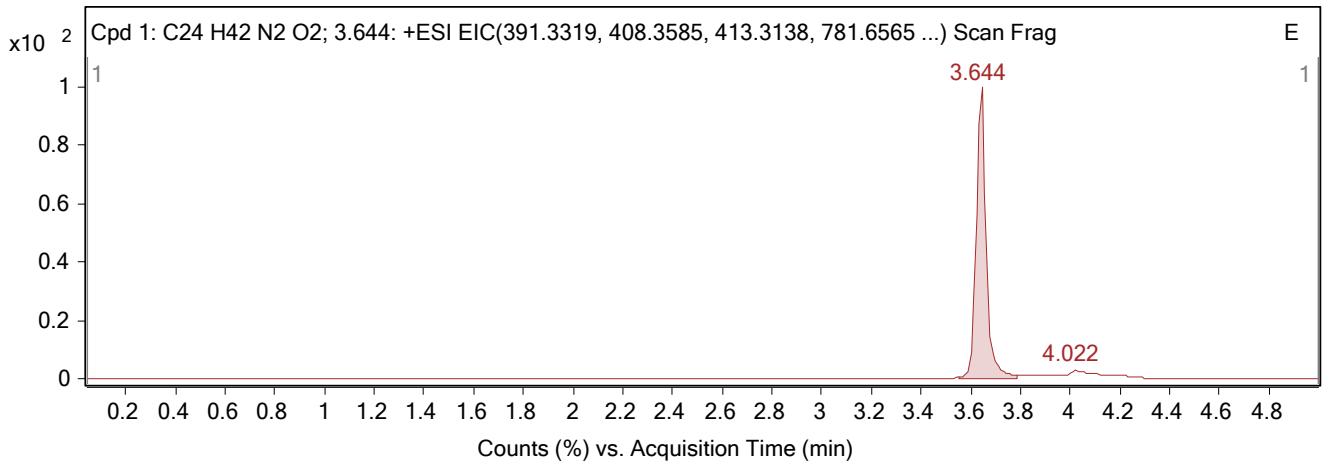

MS Zoomed Spectrum

# Target Compound Screening Report

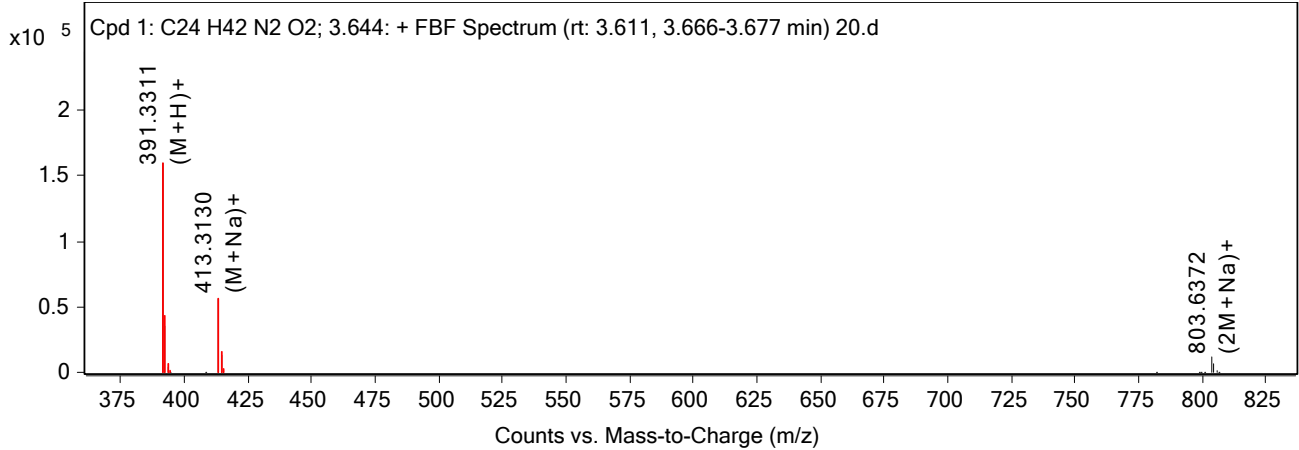

### MS Spectrum Peak List

| Obs. m/z | Charge | Abund     | Ion/Isotope |
|----------|--------|-----------|-------------|
| 391.3311 | 1      | 159283.53 | (M+H)+      |
| 392.3341 | 1      | 35164.73  | (M+H)+      |
| 393.3372 | 1      | 4554.9    | (M+H)+      |
| 394.3383 | 1      | 643.87    | (M+H)+      |
| 413.313  | 1      | 56289.82  | (M+Na)+     |
| 414.3157 | 1      | 13612.59  | (M+Na)+     |
| 415.319  | 1      | 1899.72   | (M+Na)+     |
| 803.6372 | 1      | 11544.44  | (2M+Na)+    |
| 804.6397 | 1      | 6031.28   | (2M+Na)+    |
| 805.6432 | 1      | 1734.36   | (2M+Na)+    |

### MS Zoomed Spectrum

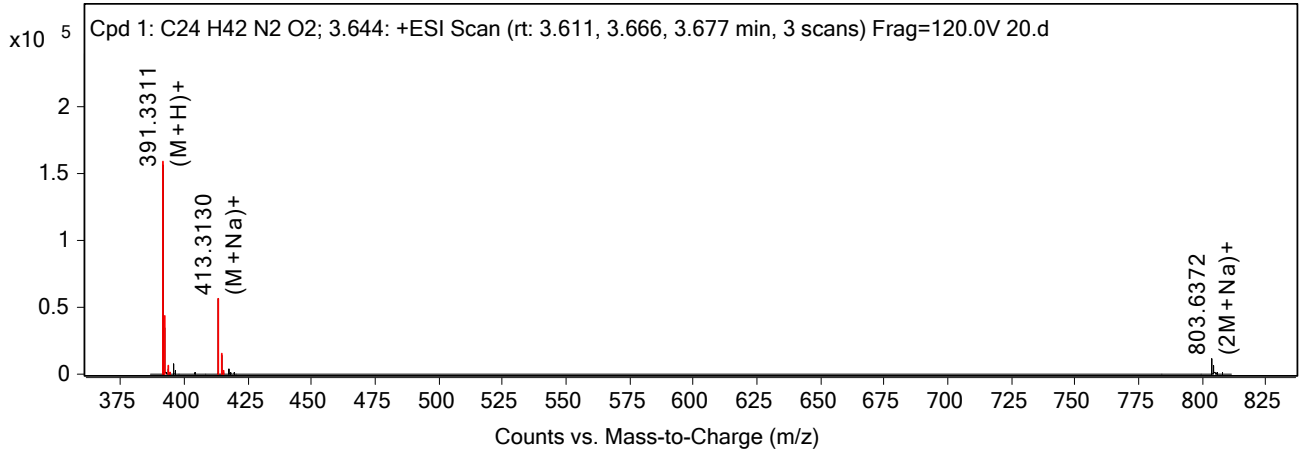

### MS Spectrum Peak List

| Obs. m/z | Charge | Abund     | Ion/Isotope | Tgt Mass Error (ppm) |
|----------|--------|-----------|-------------|----------------------|
| 391.3311 | 1      | 159283.54 | (M+H)+      | 2.16                 |
| 392.3341 | 1      | 35164.73  | (M+H)+      | 2.65                 |
| 393.3372 | 1      | 4554.9    | (M+H)+      | 2.31                 |
| 394.3383 | 1      | 643.87    | (M+H)+      | 6.98                 |
| 413.313  | 1      | 56289.82  | (M+Na)+     | 2.07                 |
| 414.3157 | 1      | 13612.59  | (M+Na)+     | 3.31                 |
| 415.319  | 1      | 1899.72   | (M+Na)+     | 2.7                  |
| 803.6372 | 1      | 11544.44  | (2M+Na)+    | 1.55                 |
| 804.6397 | 1      | 6031.28   | (2M+Na)+    | 2.51                 |
| 805.6432 | 1      | 1734.36   | (2M+Na)+    | 2.07                 |

--- End Of Report ---

# Target Compound Screening Report

|                                 |                                        |                               |                                                     |
|---------------------------------|----------------------------------------|-------------------------------|-----------------------------------------------------|
| <b>Data File</b>                | 25.d                                   | <b>Sample Name</b>            | H3486837                                            |
| <b>Sample Type</b>              | Sample                                 | <b>Position</b>               | P1-F1                                               |
| <b>Instrument Name</b>          | Instrument 1                           | <b>User Name</b>              | Denis V.Bylina                                      |
| <b>Acq Method</b>               | Fast_Gradient_HRMS_pos_Lock_08272019.m | <b>Acquired Time</b>          | 10/8/2021 3:28:52 PM (UTC+03:00)                    |
| <b>IRM Calibration Status</b>   | Success                                | <b>DA Method</b>              | 1.m                                                 |
| <b>Comment</b>                  |                                        |                               |                                                     |
| <b>Sample Group</b>             |                                        | <b>Info.</b>                  | Agilent 6224 TOF LC/MS                              |
| <b>MFC</b>                      | C23H39FN2O2                            | <b>Stream Name</b>            | LC 1                                                |
| <b>Acquisition Time (Local)</b> | 10/8/2021 3:28:52 PM (UTC+03:00)       | <b>Acquisition SW Version</b> | 6200 series TOF/6500 series Q-TOF B.08.00 (B8058.0) |
| <b>TOF Driver Version</b>       | 8.00.00                                | <b>TOF Firmware Version</b>   | 8.643                                               |
| <b>Tune Mass Range Max.</b>     | 1700                                   |                               |                                                     |

## Compound Table

| Label                         | Tgt Score | Mass Error (ppm) | Tgt Formula     | Obs. RT | Ref. Mass | Obs. Mass |
|-------------------------------|-----------|------------------|-----------------|---------|-----------|-----------|
| Cpd 1: C23 H39 F N2 O2; 3.653 | 86.75     | -1.63            | C23 H39 F N2 O2 | 3.653   | 394.2996  | 394.2989  |

| Obs. m/z | Obs. RT | Obs. Mass | Tgt Formula     | Tgt Mass | Tgt Mass Error (ppm) | RT Diff.        | Find Cpds Algorithm |
|----------|---------|-----------|-----------------|----------|----------------------|-----------------|---------------------|
| 395.3062 | 3.653   | 394.2989  | C23 H39 F N2 O2 | 394.2996 | -1.63                | Find By Formula |                     |

## Compound Chromatograms

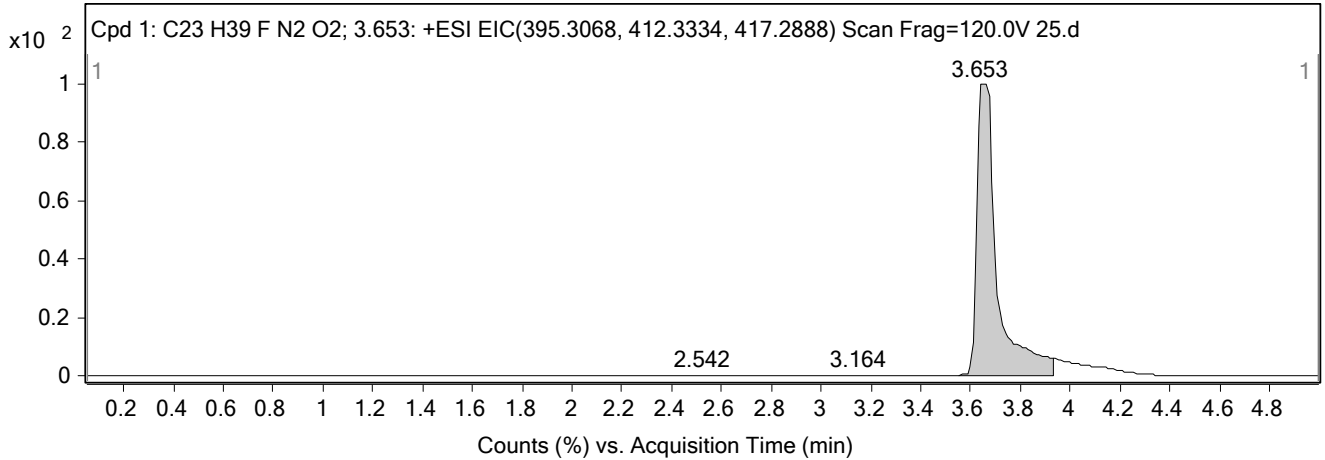

MS Zoomed Spectrum

# Target Compound Screening Report

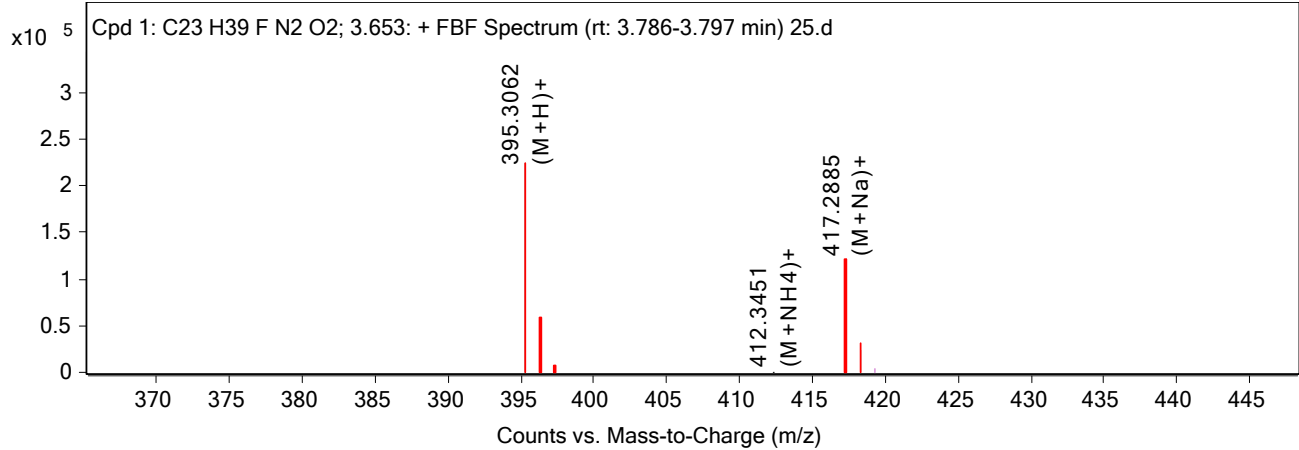

## MS Spectrum Peak List

| Obs. m/z | Charge | Abund     | Ion/Isotope |
|----------|--------|-----------|-------------|
| 395.3062 | 1      | 223752.03 | (M+H)+      |
| 396.3098 | 1      | 46393.2   | (M+H)+      |
| 397.3007 | 1      | 7963.53   | (M+H)+      |
| 412.3451 | 1      | 486.37    | (M+NH4)+    |
| 417.2885 | 1      | 120792.13 | (M+Na)+     |
| 418.2925 | 1      | 24671.84  | (M+Na)+     |

## MS Zoomed Spectrum

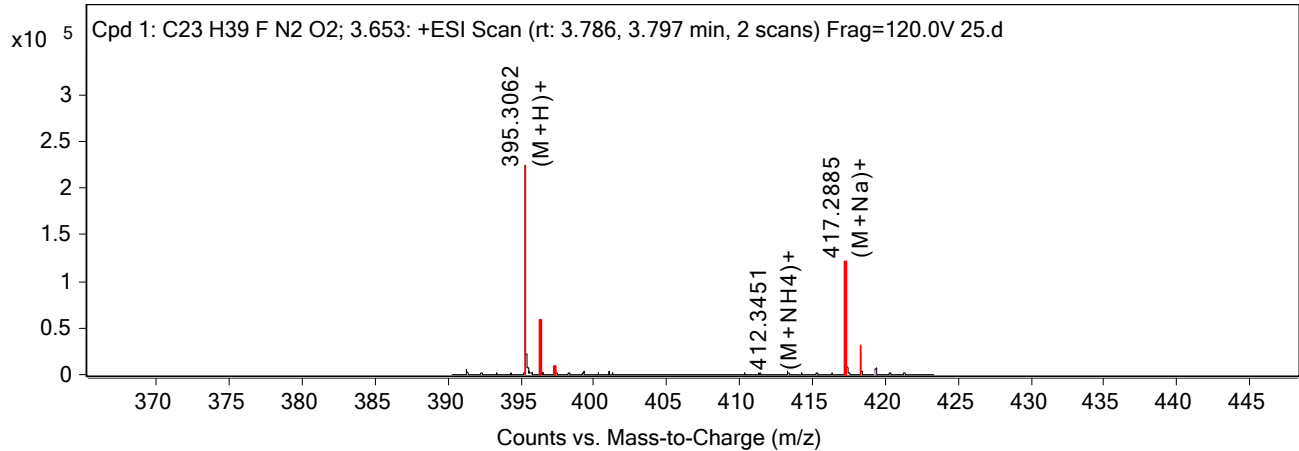

## MS Spectrum Peak List

| Obs. m/z | Charge | Abund     | Ion/Isotope | Tgt Mass Error (ppm) |
|----------|--------|-----------|-------------|----------------------|
| 395.3062 | 1      | 223752.03 | (M+H)+      | 1.6                  |
| 395.3062 |        | 223752.03 |             |                      |
| 396.3098 | 1      | 46393.2   | (M+H)+      | 0.64                 |
| 397.3007 | 1      | 7963.53   | (M+H)+      | 31.09                |
| 412.3451 | 1      | 486.37    | (M+NH4)+    | -28.48               |
| 417.2885 | 1      | 120792.13 | (M+Na)+     | 0.78                 |
| 418.2925 | 1      | 24671.84  | (M+Na)+     | -1.16                |

--- End Of Report ---

# Target Compound Screening Report

|                                 |                                        |                               |                                                     |
|---------------------------------|----------------------------------------|-------------------------------|-----------------------------------------------------|
| <b>Data File</b>                | 17.d                                   | <b>Sample Name</b>            | H2987845                                            |
| <b>Sample Type</b>              | Sample                                 | <b>Position</b>               | P1-B8                                               |
| <b>Instrument Name</b>          | Instrument 1                           | <b>User Name</b>              | Denis V.Bylina                                      |
| <b>Acq Method</b>               | Fast_Gradient_HRMS_pos_Lock_08272019.m | <b>Acquired Time</b>          | 9/22/2021 3:16:48 PM (UTC+03:00)                    |
| <b>IRM Calibration Status</b>   | Success                                | <b>DA Method</b>              | 1.m                                                 |
| <b>Comment</b>                  |                                        |                               |                                                     |
| <b>Sample Group</b>             |                                        | <b>Info.</b>                  | Agilent 6224 TOF LC/MS                              |
| <b>MFC</b>                      | C22H38N2O2                             | <b>Stream Name</b>            | LC 1                                                |
| <b>Acquisition Time (Local)</b> | 9/22/2021 3:16:48 PM (UTC+03:00)       | <b>Acquisition SW Version</b> | 6200 series TOF/6500 series Q-TOF B.08.00 (B8058.0) |
| <b>TOF Driver Version</b>       | 8.00.00                                | <b>TOF Firmware Version</b>   | 8.643                                               |
| <b>Tune Mass Range Max.</b>     | 1700                                   |                               |                                                     |

### Compound Table

| Label                       | Tgt Score | Mass Error (ppm) | Tgt Formula   | Obs. RT | Ref. Mass | Obs. Mass |
|-----------------------------|-----------|------------------|---------------|---------|-----------|-----------|
| Cpd 1: C22 H38 N2 O2; 3.270 | 98.01     | -1.99            | C22 H38 N2 O2 | 3.27    | 362.2933  | 362.2926  |

| Obs. m/z | Obs. RT | Obs. Mass | Tgt Formula   | Tgt Mass | Tgt Mass Error (ppm) | RT Diff.        | Find Cpd Algorithm |
|----------|---------|-----------|---------------|----------|----------------------|-----------------|--------------------|
| 385.2819 | 3.27    | 362.2926  | C22 H38 N2 O2 | 362.2933 | -1.99                | Find By Formula |                    |

### Compound Chromatograms

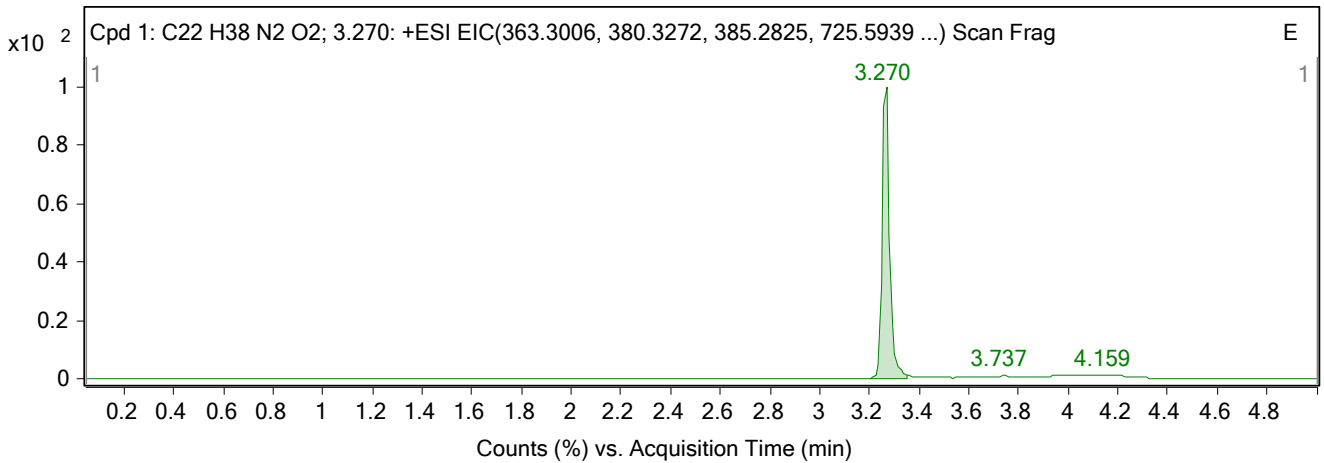

MS Zoomed Spectrum

# Target Compound Screening Report

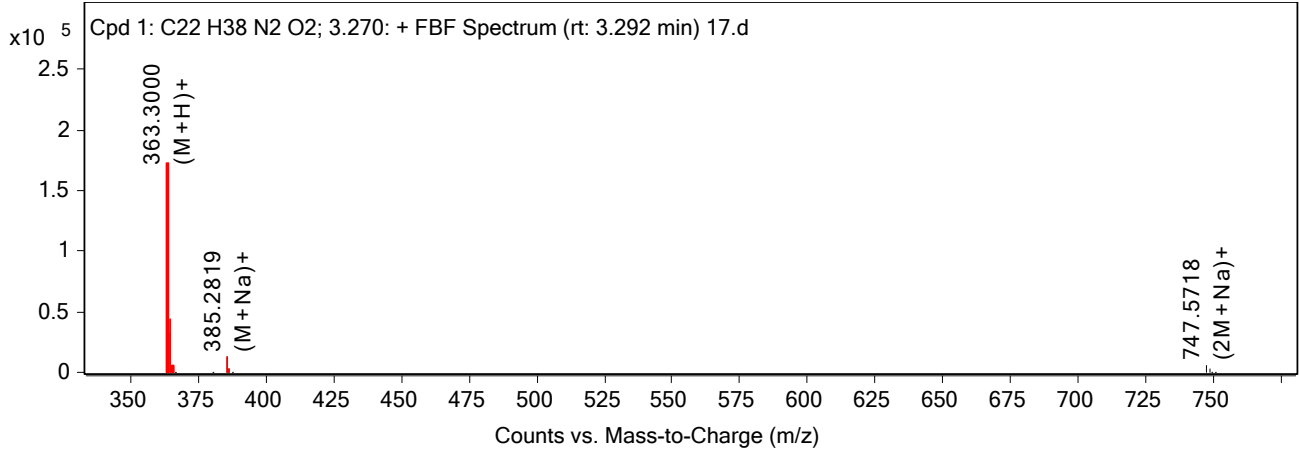

### MS Spectrum Peak List

| Obs. m/z | Charge | Abund     | Ion/Isotope |
|----------|--------|-----------|-------------|
| 363.3    | 1      | 172473.55 | (M+H)+      |
| 364.3035 | 1      | 33215.32  | (M+H)+      |
| 365.3066 | 1      | 4170.14   | (M+H)+      |
| 366.3097 | 1      | 516       | (M+H)+      |
| 385.2819 | 1      | 13034.42  | (M+Na)+     |
| 386.2849 | 1      | 3121.38   | (M+Na)+     |
| 387.2853 | 1      | 586.75    | (M+Na)+     |
| 747.5718 | 1      | 5772.5    | (2M+Na)+    |
| 748.5763 | 1      | 2706.85   | (2M+Na)+    |
| 749.5754 | 1      | 770.83    | (2M+Na)+    |

### MS Zoomed Spectrum

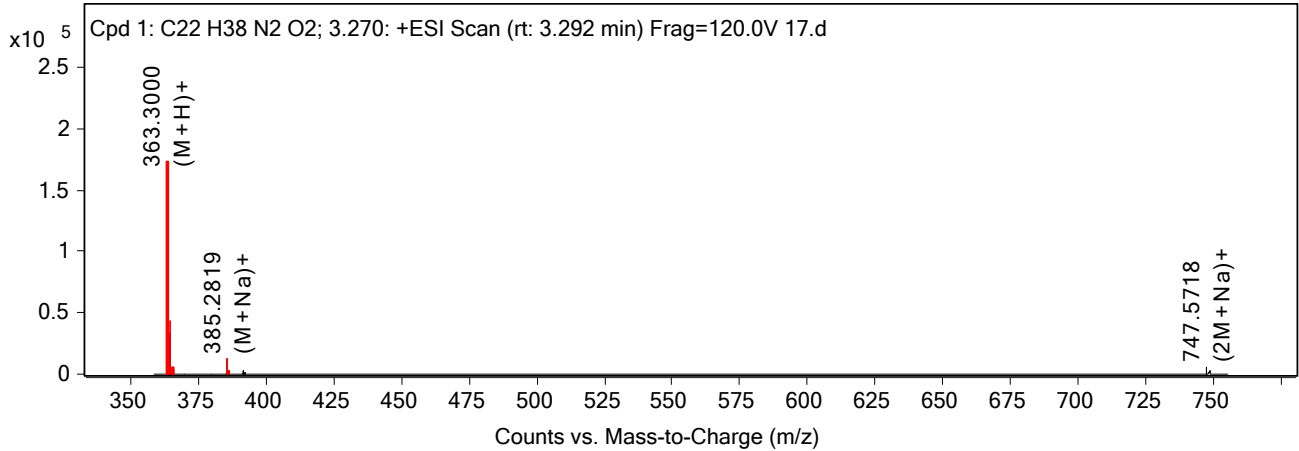

### MS Spectrum Peak List

| Obs. m/z | Charge | Abund     | Ion/Isotope | Tgt Mass Error (ppm) |
|----------|--------|-----------|-------------|----------------------|
| 363.3    | 1      | 172473.55 | (M+H)+      | 1.75                 |
| 364.3035 | 1      | 33215.32  | (M+H)+      | 0.78                 |
| 365.3066 | 1      | 4170.14   | (M+H)+      | 0.56                 |
| 366.3097 | 1      | 516       | (M+H)+      | -0.21                |
| 385.2819 | 1      | 13034.42  | (M+Na)+     | 1.73                 |
| 386.2849 | 1      | 3121.38   | (M+Na)+     | 2.2                  |
| 387.2853 | 1      | 586.75    | (M+Na)+     | 8.82                 |
| 747.5718 | 1      | 5772.5    | (2M+Na)+    | 5.5                  |
| 748.5763 | 1      | 2706.85   | (2M+Na)+    | 3.8                  |
| 749.5754 | 1      | 770.83    | (2M+Na)+    | 9.01                 |

--- End Of Report ---

## Target Compound Screening Report

|                                 |                                        |                               |                                                     |
|---------------------------------|----------------------------------------|-------------------------------|-----------------------------------------------------|
| <b>Data File</b>                | 21-7.d                                 | <b>Sample Name</b>            | H2986949                                            |
| <b>Sample Type</b>              | Sample                                 | <b>Position</b>               | P1-C3                                               |
| <b>Instrument Name</b>          | Instrument 1                           | <b>User Name</b>              | Denis V.Bylina                                      |
| <b>Acq Method</b>               | Fast_Gradient_HRMS_pos_Lock_08272019.m | <b>Acquired Time</b>          | 9/24/2021 5:50:21 PM (UTC+03:00)                    |
| <b>IRM Calibration Status</b>   | Success                                | <b>DA Method</b>              | 1.m                                                 |
| <b>Comment</b>                  |                                        |                               |                                                     |
| <b>Sample Group</b>             |                                        | <b>Info.</b>                  | Agilent 6224 TOF LC/MS                              |
| <b>MFC</b>                      | C24H42N2O2                             | <b>Stream Name</b>            | LC 1                                                |
| <b>Acquisition Time (Local)</b> | 9/24/2021 5:50:21 PM (UTC+03:00)       | <b>Acquisition SW Version</b> | 6200 series TOF/6500 series Q-TOF B.08.00 (B8058.0) |
| <b>TOF Driver Version</b>       | 8.00.00                                | <b>TOF Firmware Version</b>   | 8.643                                               |
| <b>Tune Mass Range Max.</b>     | 1700                                   |                               |                                                     |

### Compound Table

| Label                       | Tgt Score | Mass Error (ppm) | Tgt Formula   | Obs. RT | Ref. Mass | Obs. Mass |
|-----------------------------|-----------|------------------|---------------|---------|-----------|-----------|
| Cpd 1: C24 H42 N2 O2; 3.601 | 95.7      | -2.38            | C24 H42 N2 O2 | 3.601   | 390.3246  | 390.3237  |

| Obs. m/z | Obs. RT | Obs. Mass | Tgt Formula   | Tgt Mass | Tgt Mass Error (ppm) | RT Diff.        | Find Cpds Algorithm |
|----------|---------|-----------|---------------|----------|----------------------|-----------------|---------------------|
| 413.313  | 3.601   | 390.3237  | C24 H42 N2 O2 | 390.3246 | -2.38                | Find By Formula |                     |

### Compound Chromatograms

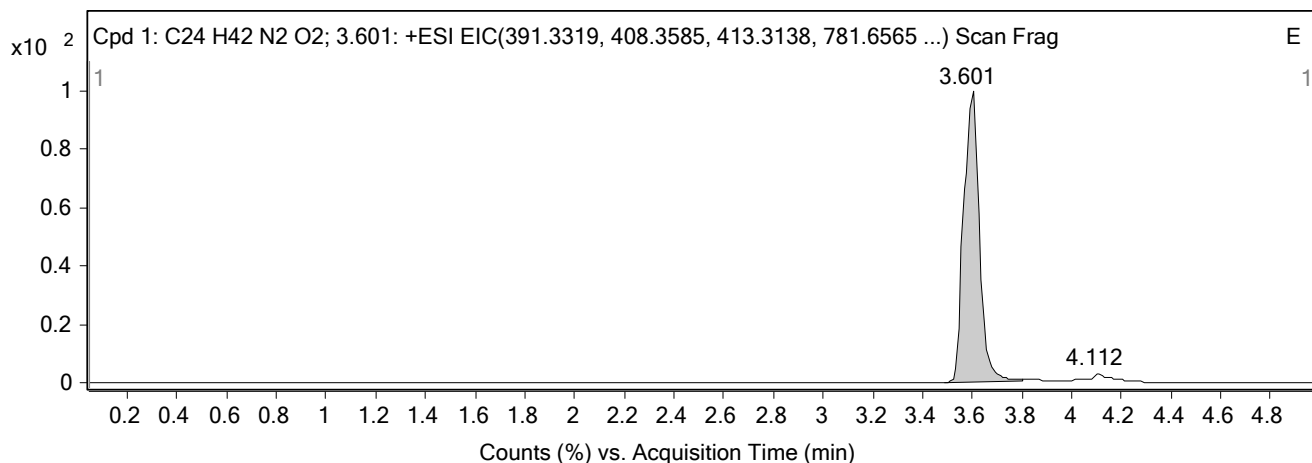

MS Zoomed Spectrum

# Target Compound Screening Report

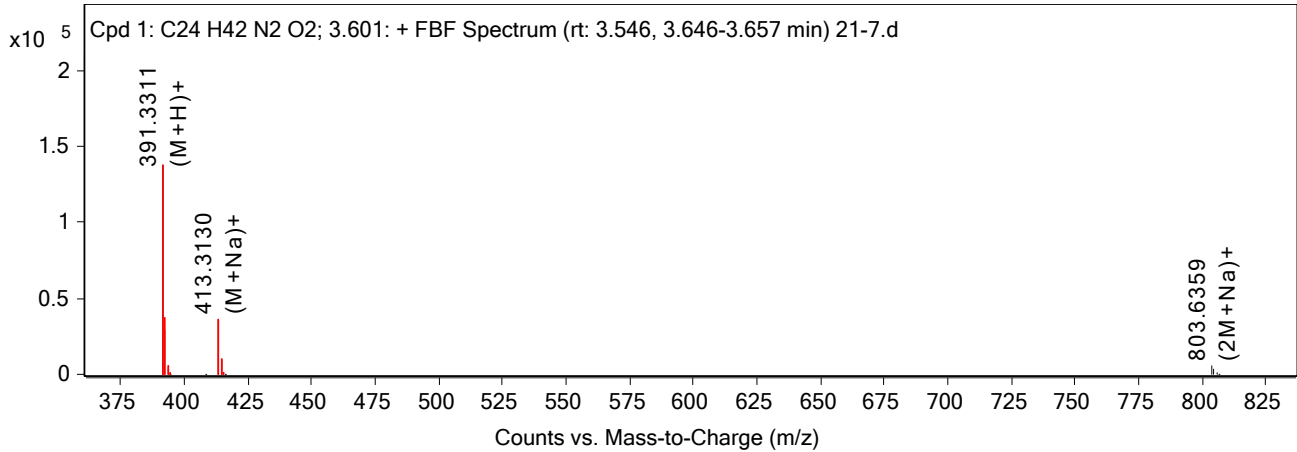

## MS Spectrum Peak List

| Obs. m/z | Charge | Abund     | Ion/Isotope |
|----------|--------|-----------|-------------|
| 391.3311 | 1      | 137549.02 | (M+H)+      |
| 392.3345 | 1      | 29926.91  | (M+H)+      |
| 393.3381 | 1      | 4325.33   | (M+H)+      |
| 394.3363 | 1      | 604.7     | (M+H)+      |
| 413.313  | 1      | 36632.86  | (M+Na)+     |
| 414.3161 | 1      | 8643.9    | (M+Na)+     |
| 415.3173 | 1      | 1623.49   | (M+Na)+     |
| 803.6359 | 1      | 5816.76   | (2M+Na)+    |
| 804.6381 | 1      | 3272.98   | (2M+Na)+    |
| 805.6389 | 1      | 972.12    | (2M+Na)+    |

## MS Zoomed Spectrum

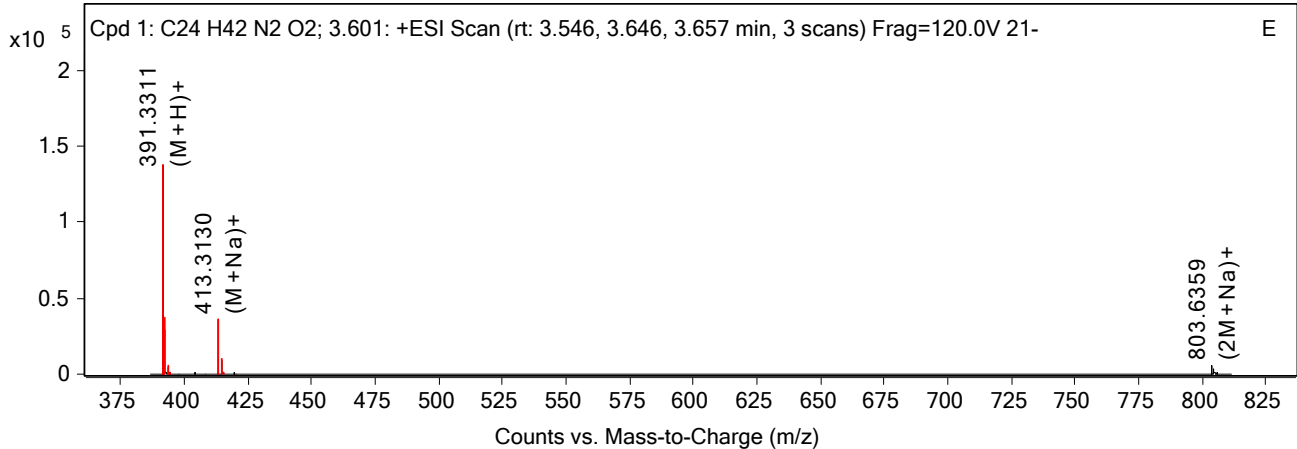

## MS Spectrum Peak List

| Obs. m/z | Charge | Abund     | Ion/Isotope | Tgt Mass Error (ppm) |
|----------|--------|-----------|-------------|----------------------|
| 391.3311 | 1      | 137549.02 | (M+H)+      | 1.99                 |
| 392.3345 | 1      | 29926.91  | (M+H)+      | 1.76                 |
| 393.3381 | 1      | 4325.33   | (M+H)+      | 0.26                 |
| 394.3363 | 1      | 604.7     | (M+H)+      | 11.89                |
| 413.313  | 1      | 36632.85  | (M+Na)+     | 2.12                 |
| 414.3161 | 1      | 8643.9    | (M+Na)+     | 2.46                 |
| 415.3173 | 1      | 1623.49   | (M+Na)+     | 6.63                 |
| 803.6359 | 1      | 5816.76   | (2M+Na)+    | 3.23                 |
| 804.6381 | 1      | 3272.98   | (2M+Na)+    | 4.53                 |
| 805.6389 | 1      | 972.12    | (2M+Na)+    | 7.36                 |

--- End Of Report ---



# Target Compound Screening Report

|                                 |                                        |                               |                                                     |
|---------------------------------|----------------------------------------|-------------------------------|-----------------------------------------------------|
| <b>Data File</b>                | 14.d                                   | <b>Sample Name</b>            | H2981663                                            |
| <b>Sample Type</b>              | Sample                                 | <b>Position</b>               | P1-B5                                               |
| <b>Instrument Name</b>          | Instrument 1                           | <b>User Name</b>              | Denis V.Bylina                                      |
| <b>Acq Method</b>               | Fast_Gradient_HRMS_pos_Lock_08272019.m | <b>Acquired Time</b>          | 9/24/2021 11:36:43 AM (UTC+03:00)                   |
| <b>IRM Calibration Status</b>   | Success                                | <b>DA Method</b>              | 1.m                                                 |
| <b>Comment</b>                  |                                        |                               |                                                     |
| <b>Sample Group</b>             |                                        | <b>Info.</b>                  | Agilent 6224 TOF LC/MS                              |
| <b>MFC</b>                      | C22H33N3O6S2                           | <b>Stream Name</b>            | LC 1                                                |
| <b>Acquisition Time (Local)</b> | 9/24/2021 11:36:43 AM (UTC+03:00)      | <b>Acquisition SW Version</b> | 6200 series TOF/6500 series Q-TOF B.08.00 (B8058.0) |
| <b>TOF Driver Version</b>       | 8.00.00                                | <b>TOF Firmware Version</b>   | 8.643                                               |
| <b>Tune Mass Range Max.</b>     | 1700                                   |                               |                                                     |

## Compound Table

| Label                          | Tgt Score | Mass Error (ppm) | Tgt Formula      | Obs. RT | Ref. Mass | Obs. Mass |
|--------------------------------|-----------|------------------|------------------|---------|-----------|-----------|
| Cpd 1: C22 H33 N3 O6 S2; 3.166 | 92.89     | -1.44            | C22 H33 N3 O6 S2 | 3.166   | 499.1811  | 499.1804  |

| Obs. m/z | Obs. RT | Obs. Mass | Tgt Formula      | Tgt Mass | Tgt Mass Error (ppm) | RT Diff.        | Find Cps Algorithm |
|----------|---------|-----------|------------------|----------|----------------------|-----------------|--------------------|
| 500.1876 | 3.166   | 499.1804  | C22 H33 N3 O6 S2 | 499.1811 | -1.44                | Find By Formula |                    |

## Compound Chromatograms

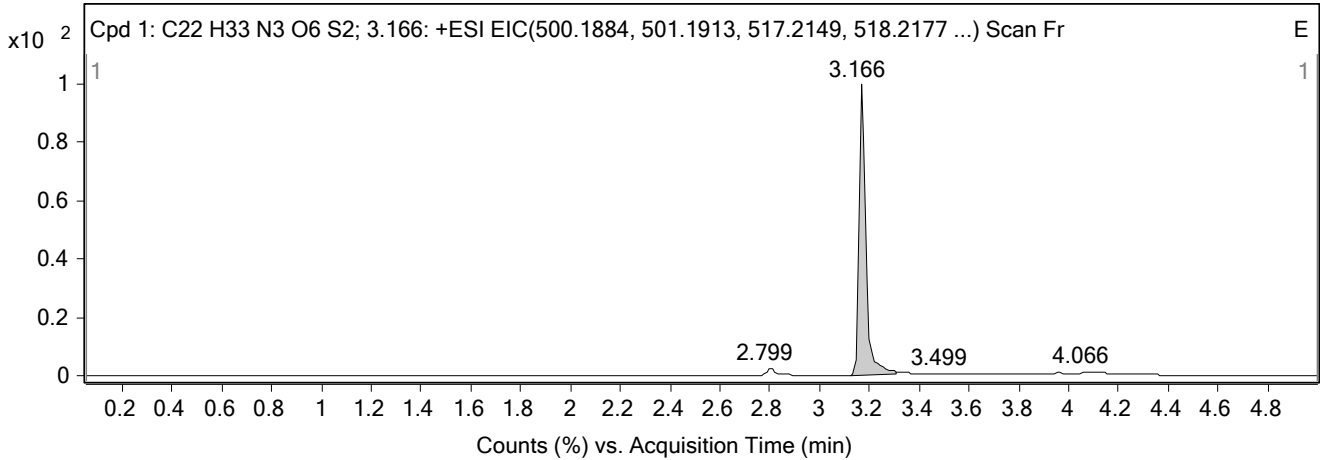

MS Zoomed Spectrum

# Target Compound Screening Report

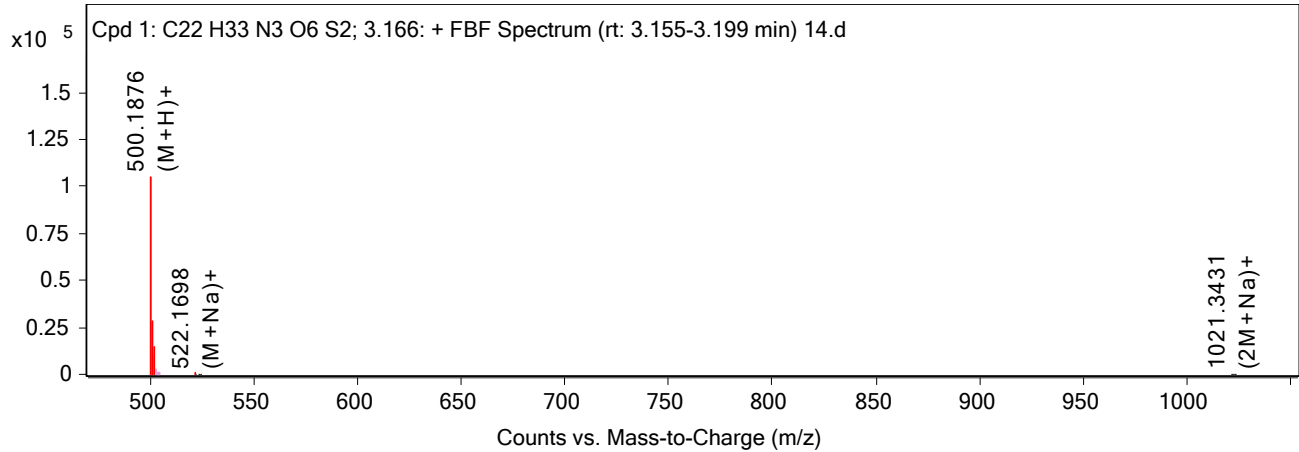

## MS Spectrum Peak List

| Obs. m/z  | Charge | Abund     | Ion/Isotope |
|-----------|--------|-----------|-------------|
| 500.1876  | 1      | 105141.89 | (M+H)+      |
| 501.1907  | 1      | 22892.09  | (M+H)+      |
| 502.1867  | 1      | 9947.18   | (M+H)+      |
| 522.1698  | 1      | 468.63    | (M+Na)+     |
| 523.17    | 1      | 170.03    | (M+Na)+     |
| 524.1723  | 1      | 104.2     | (M+Na)+     |
| 1021.3431 | 1      | 99.38     | (2M+Na)+    |
| 1022.3423 | 1      | 46.02     | (2M+Na)+    |
| 1023.3538 | 1      | 64.88     | (2M+Na)+    |

## MS Zoomed Spectrum

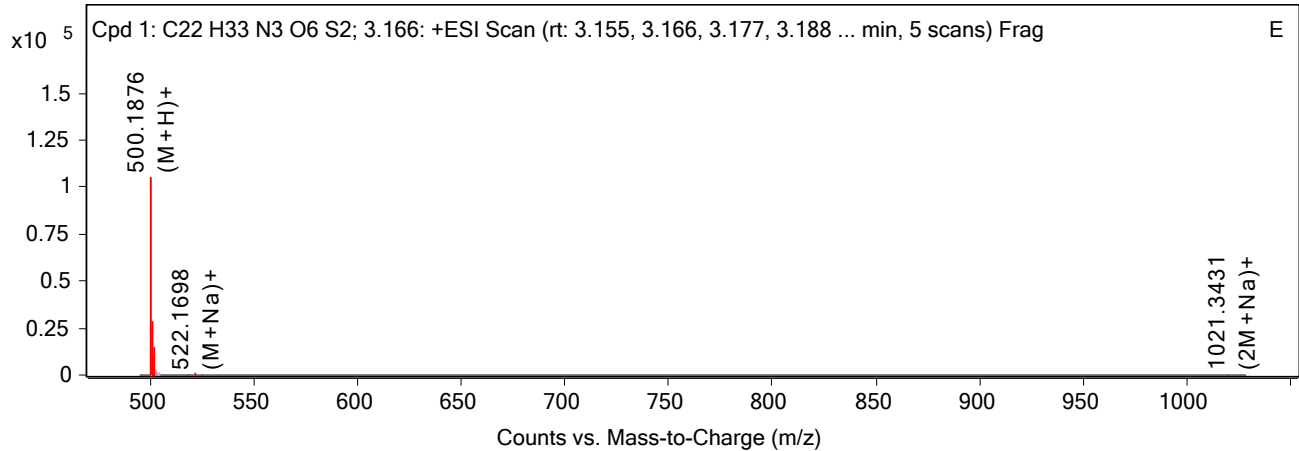

## MS Spectrum Peak List

| Obs. m/z  | Charge | Abund     | Ion/Isotope | Tgt Mass Error (ppm) |
|-----------|--------|-----------|-------------|----------------------|
| 500.1876  | 1      | 105141.89 | (M+H)+      | 1.48                 |
| 501.1907  | 1      | 22892.09  | (M+H)+      | 1.09                 |
| 502.1867  | 1      | 9947.18   | (M+H)+      | 1.55                 |
| 522.1698  | 1      | 468.63    | (M+Na)+     | 0.9                  |
| 523.17    | 1      | 170.03    | (M+Na)+     | 6.18                 |
| 524.1723  | 1      | 104.2     | (M+Na)+     | -5.51                |
| 1021.3431 | 1      | 99.38     | (2M+Na)+    | 8.13                 |
| 1022.3423 | 1      | 46.02     | (2M+Na)+    | 11.74                |
| 1023.3538 | 1      | 64.88     | (2M+Na)+    | -1.8                 |

--- End Of Report ---

# Target Compound Screening Report

|                                 |                                        |                               |                                                     |
|---------------------------------|----------------------------------------|-------------------------------|-----------------------------------------------------|
| <b>Data File</b>                | 3-2.d                                  | <b>Sample Name</b>            | H2979258                                            |
| <b>Sample Type</b>              | Sample                                 | <b>Position</b>               | P1-A3                                               |
| <b>Instrument Name</b>          | Instrument 1                           | <b>User Name</b>              | Denis V.Bylina                                      |
| <b>Acq Method</b>               | Fast_Gradient_HRMS_pos_Lock_08272019.m | <b>Acquired Time</b>          | 9/24/2021 10:21:27 AM (UTC+03:00)                   |
| <b>IRM Calibration Status</b>   | Success                                | <b>DA Method</b>              | 1.m                                                 |
| <b>Comment</b>                  |                                        |                               |                                                     |
| <b>Sample Group</b>             |                                        | <b>Info.</b>                  | Agilent 6224 TOF LC/MS                              |
| <b>MFC</b>                      | C22H29N3O6S2                           | <b>Stream Name</b>            | LC 1                                                |
| <b>Acquisition Time (Local)</b> | 9/24/2021 10:21:27 AM (UTC+03:00)      | <b>Acquisition SW Version</b> | 6200 series TOF/6500 series Q-TOF B.08.00 (B8058.0) |
| <b>TOF Driver Version</b>       | 8.00.00                                | <b>TOF Firmware Version</b>   | 8.643                                               |
| <b>Tune Mass Range Max.</b>     | 1700                                   |                               |                                                     |

## Compound Table

| Label                          | Tgt Score | Mass Error (ppm) | Tgt Formula      | Obs. RT | Ref. Mass | Obs. Mass |
|--------------------------------|-----------|------------------|------------------|---------|-----------|-----------|
| Cpd 1: C22 H29 N3 O6 S2; 3.253 | 94.76     | -1.96            | C22 H29 N3 O6 S2 | 3.253   | 495.1498  | 495.1488  |

| Obs. m/z | Obs. RT | Obs. Mass | Tgt Formula      | Tgt Mass | Tgt Mass Error (ppm) | RT Diff.        | Find Cpds Algorithm |
|----------|---------|-----------|------------------|----------|----------------------|-----------------|---------------------|
| 496.1561 | 3.253   | 495.1488  | C22 H29 N3 O6 S2 | 495.1498 | -1.96                | Find By Formula |                     |

## Compound Chromatograms

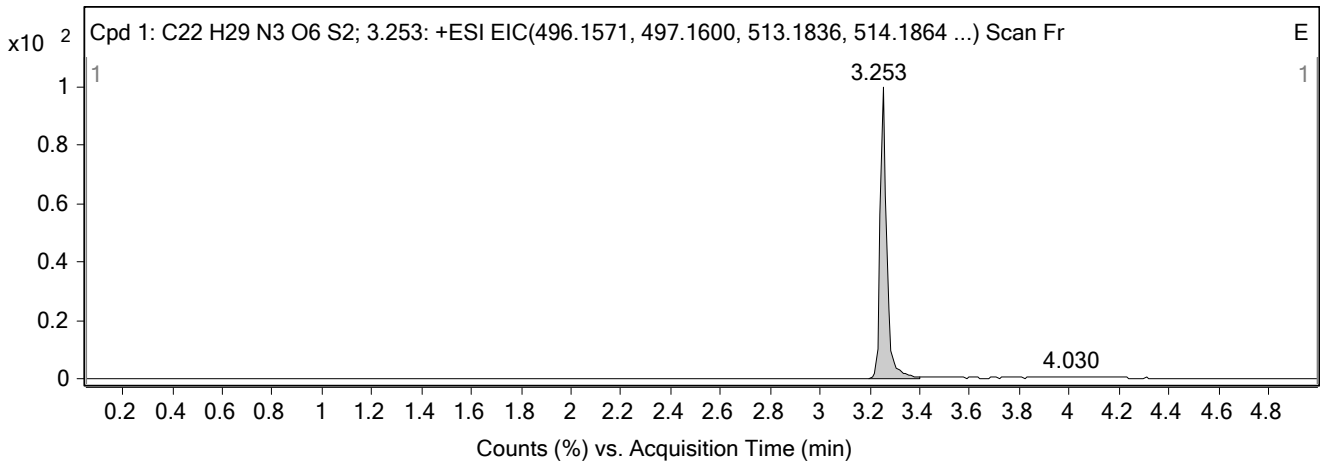

MS Zoomed Spectrum

# Target Compound Screening Report

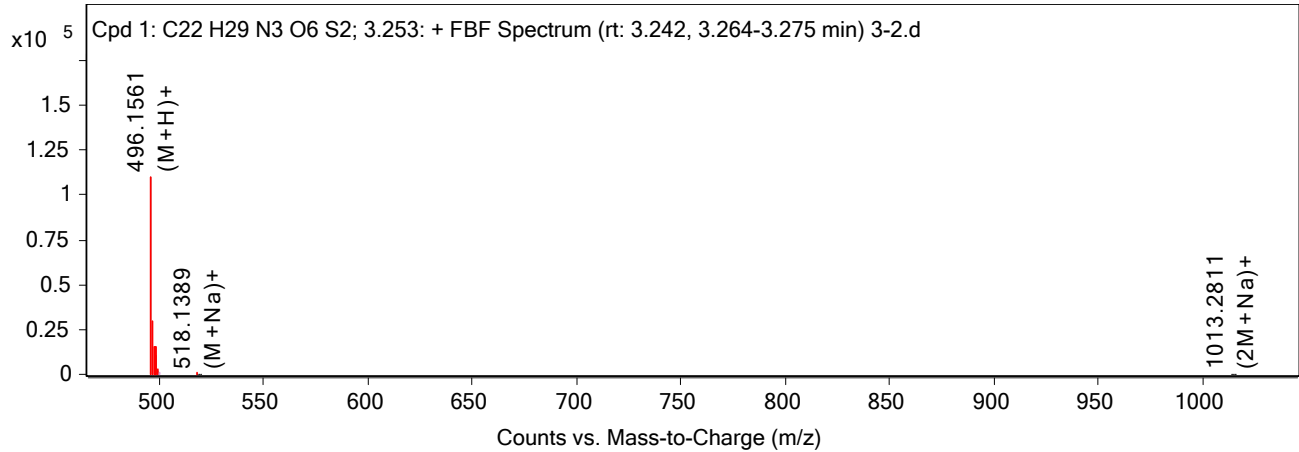

## MS Spectrum Peak List

| Obs. m/z  | Charge | Abund     | Ion/Isotope |
|-----------|--------|-----------|-------------|
| 496.1561  | 1      | 110150.62 | (M+H)+      |
| 497.1587  | 1      | 24613.67  | (M+H)+      |
| 498.1555  | 1      | 11038.03  | (M+H)+      |
| 499.1577  | 1      | 2068.2    | (M+H)+      |
| 518.1389  | 1      | 509.4     | (M+Na)+     |
| 519.1377  | 1      | 189.34    | (M+Na)+     |
| 520.138   | 1      | 117.31    | (M+Na)+     |
| 1013.2811 | 1      | 61.45     | (2M+Na)+    |
| 1014.2847 | 1      | 34.38     | (2M+Na)+    |
| 1015.2895 | 1      | 27.02     | (2M+Na)+    |

## MS Zoomed Spectrum

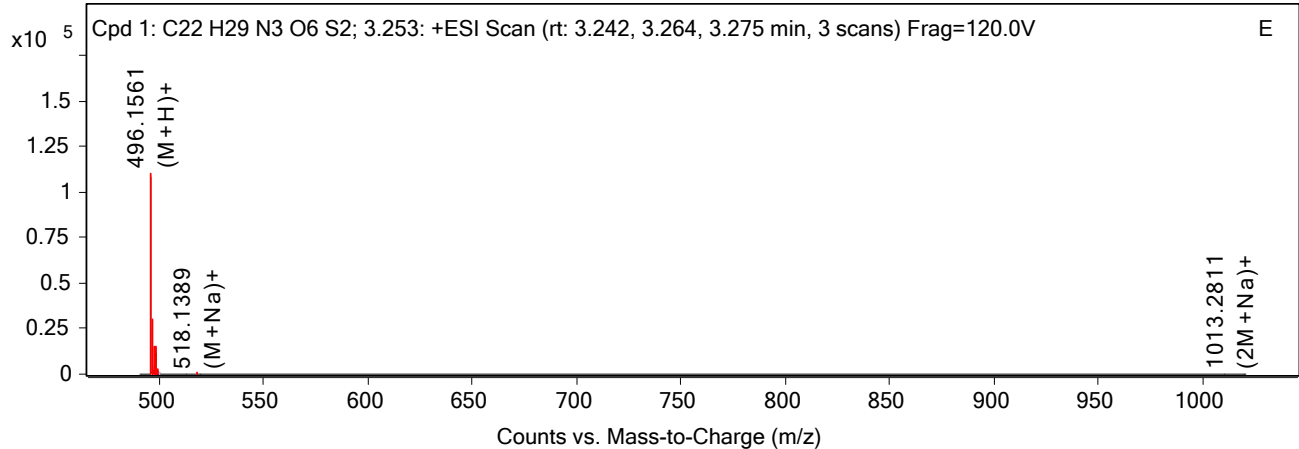

## MS Spectrum Peak List

| Obs. m/z  | Charge | Abund     | Ion/Isotope | Tgt Mass Error (ppm) |
|-----------|--------|-----------|-------------|----------------------|
| 496.1561  | 1      | 110150.62 | (M+H)+      | 1.89                 |
| 497.1587  | 1      | 24613.67  | (M+H)+      | 2.63                 |
| 498.1555  | 1      | 11038.03  | (M+H)+      | 1.4                  |
| 499.1577  | 1      | 2068.2    | (M+H)+      | 0.08                 |
| 518.1389  | 1      | 509.4     | (M+Na)+     | 0.11                 |
| 519.1377  | 1      | 189.34    | (M+Na)+     | 8.13                 |
| 520.138   | 1      | 117.31    | (M+Na)+     | 0.25                 |
| 1013.2811 | 1      | 61.45     | (2M+Na)+    | 7.58                 |
| 1014.2847 | 1      | 34.38     | (2M+Na)+    | 6.92                 |
| 1015.2895 | 1      | 27.02     | (2M+Na)+    | -0.14                |

--- End Of Report ---

# Target Compound Screening Report

|                                 |                                        |                               |                                                     |
|---------------------------------|----------------------------------------|-------------------------------|-----------------------------------------------------|
| <b>Data File</b>                | 8-2.d                                  | <b>Sample Name</b>            | H2982698                                            |
| <b>Sample Type</b>              | Sample                                 | <b>Position</b>               | P1-A8                                               |
| <b>Instrument Name</b>          | Instrument 1                           | <b>User Name</b>              | Denis V.Bylina                                      |
| <b>Acq Method</b>               | Fast_Gradient_HRMS_pos_Lock_08272019.m | <b>Acquired Time</b>          | 9/24/2021 10:49:03 AM (UTC+03:00)                   |
| <b>IRM Calibration Status</b>   | Success                                | <b>DA Method</b>              | 1.m                                                 |
| <b>Comment</b>                  |                                        |                               |                                                     |
| <b>Sample Group</b>             |                                        | <b>Info.</b>                  | Agilent 6224 TOF LC/MS                              |
| <b>MFC</b>                      | C21H27N3O5S3                           | <b>Stream Name</b>            | LC 1                                                |
| <b>Acquisition Time (Local)</b> | 9/24/2021 10:49:03 AM (UTC+03:00)      | <b>Acquisition SW Version</b> | 6200 series TOF/6500 series Q-TOF B.08.00 (B8058.0) |
| <b>TOF Driver Version</b>       | 8.00.00                                | <b>TOF Firmware Version</b>   | 8.643                                               |
| <b>Tune Mass Range Max.</b>     | 1700                                   |                               |                                                     |

## Compound Table

| Label                          | Tgt Score | Mass Error (ppm) | Tgt Formula      | Obs. RT | Ref. Mass | Obs. Mass |
|--------------------------------|-----------|------------------|------------------|---------|-----------|-----------|
| Cpd 1: C21 H27 N3 O5 S3; 3.223 | 93.17     | -1.24            | C21 H27 N3 O5 S3 | 3.223   | 497.1113  | 497.1107  |

| Obs. m/z | Obs. RT | Obs. Mass | Tgt Formula      | Tgt Mass | Tgt Mass Error (ppm) | RT Diff.        | Find Cps Algorithm |
|----------|---------|-----------|------------------|----------|----------------------|-----------------|--------------------|
| 498.1179 | 3.223   | 497.1107  | C21 H27 N3 O5 S3 | 497.1113 | -1.24                | Find By Formula |                    |

## Compound Chromatograms

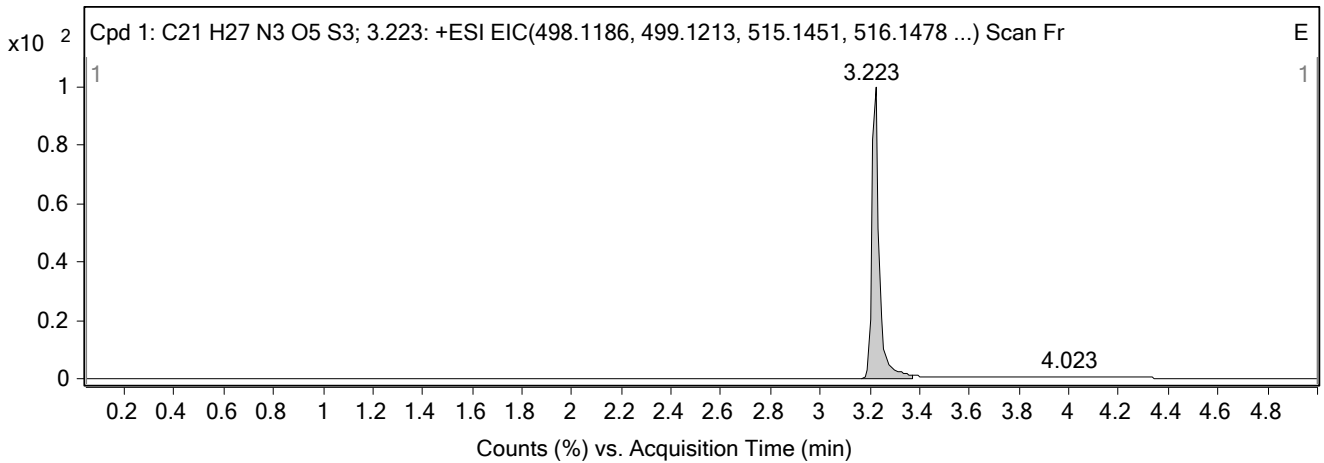

MS Zoomed Spectrum

# Target Compound Screening Report

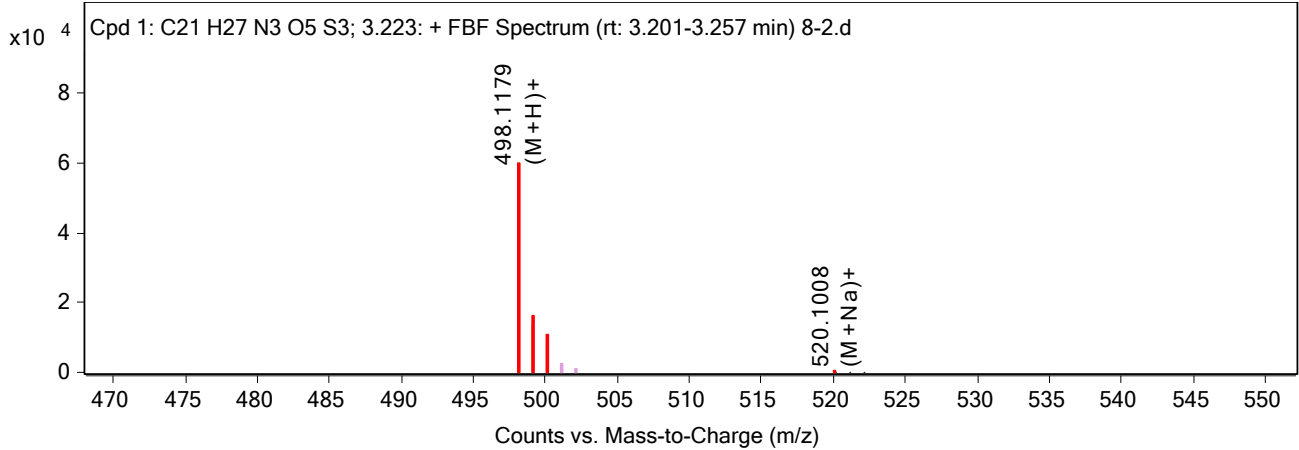

## MS Spectrum Peak List

| Obs. m/z | Charge | Abund    | Ion/Isotope |
|----------|--------|----------|-------------|
| 498.1179 | 1      | 59932.77 | (M+H)+      |
| 499.1207 | 1      | 13306.17 | (M+H)+      |
| 500.116  | 1      | 8061.89  | (M+H)+      |
| 520.1008 | 1      | 268.57   | (M+Na)+     |
| 521.1039 | 1      | 78.68    | (M+Na)+     |
| 522.1112 | 1      | 61.78    | (M+Na)+     |

## MS Zoomed Spectrum

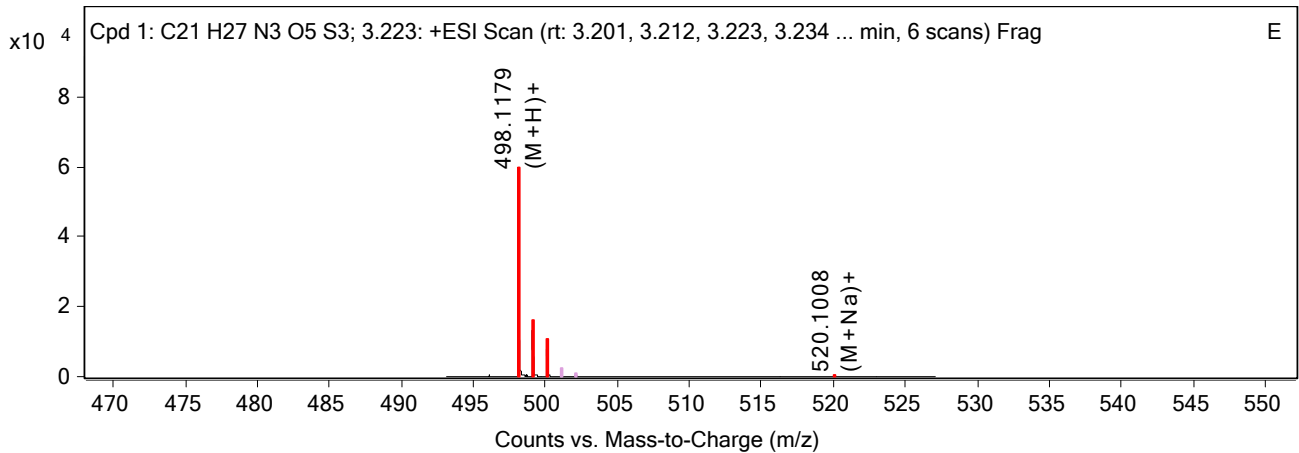

## MS Spectrum Peak List

| Obs. m/z | Charge | Abund    | Ion/Isotope | Tgt Mass Error (ppm) |
|----------|--------|----------|-------------|----------------------|
| 498.1179 | 1      | 59932.77 | (M+H)+      | 1.23                 |
| 498.1179 |        | 59932.77 |             |                      |
| 499.1207 | 1      | 13306.17 | (M+H)+      | 1.29                 |
| 500.116  | 1      | 8061.89  | (M+H)+      | 1.48                 |
| 520.1008 | 1      | 268.57   | (M+Na)+     | -0.51                |
| 521.1039 | 1      | 78.68    | (M+Na)+     | -1.23                |
| 522.1112 | 1      | 61.78    | (M+Na)+     | -24.1                |

--- End Of Report ---

# Target Compound Screening Report

|                                 |                                        |                               |                                                     |
|---------------------------------|----------------------------------------|-------------------------------|-----------------------------------------------------|
| <b>Data File</b>                | 12-2.d                                 | <b>Sample Name</b>            | H2981205                                            |
| <b>Sample Type</b>              | Sample                                 | <b>Position</b>               | P1-B3                                               |
| <b>Instrument Name</b>          | Instrument 1                           | <b>User Name</b>              | Denis V.Bylina                                      |
| <b>Acq Method</b>               | Fast_Gradient_HRMS_pos_Lock_08272019.m | <b>Acquired Time</b>          | 9/24/2021 11:31:11 AM (UTC+03:00)                   |
| <b>IRM Calibration Status</b>   | Success                                | <b>DA Method</b>              | 1.m                                                 |
| <b>Comment</b>                  |                                        |                               |                                                     |
| <b>Sample Group</b>             |                                        | <b>Info.</b>                  | Agilent 6224 TOF LC/MS                              |
| <b>MFC</b>                      | C22H29N3O5S2                           | <b>Stream Name</b>            | LC 1                                                |
| <b>Acquisition Time (Local)</b> | 9/24/2021 11:31:11 AM (UTC+03:00)      | <b>Acquisition SW Version</b> | 6200 series TOF/6500 series Q-TOF B.08.00 (B8058.0) |
| <b>TOF Driver Version</b>       | 8.00.00                                | <b>TOF Firmware Version</b>   | 8.643                                               |
| <b>Tune Mass Range Max.</b>     | 1700                                   |                               |                                                     |

## Compound Table

| Label                          | Tgt Score | Mass Error (ppm) | Tgt Formula      | Obs. RT | Ref. Mass | Obs. Mass |
|--------------------------------|-----------|------------------|------------------|---------|-----------|-----------|
| Cpd 1: C22 H29 N3 O5 S2; 3.223 | 94.44     | -1.02            | C22 H29 N3 O5 S2 | 3.223   | 479.1549  | 479.1544  |

| Obs. m/z | Obs. RT | Obs. Mass | Tgt Formula      | Tgt Mass | Tgt Mass Error (ppm) | RT Diff.        | Find Cps Algorithm |
|----------|---------|-----------|------------------|----------|----------------------|-----------------|--------------------|
| 480.1617 | 3.223   | 479.1544  | C22 H29 N3 O5 S2 | 479.1549 | -1.02                | Find By Formula |                    |

## Compound Chromatograms

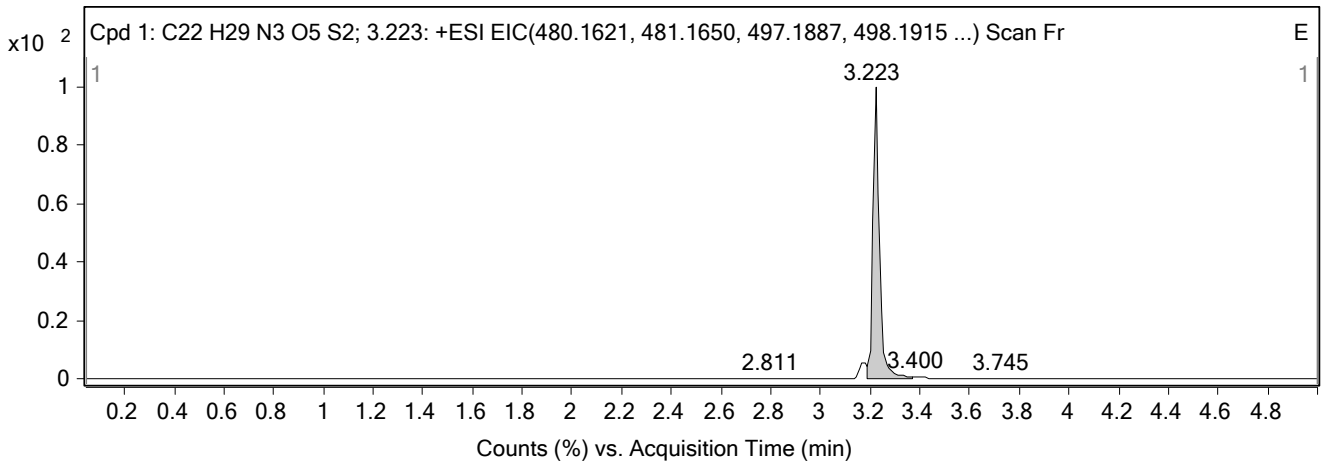

MS Zoomed Spectrum

# Target Compound Screening Report

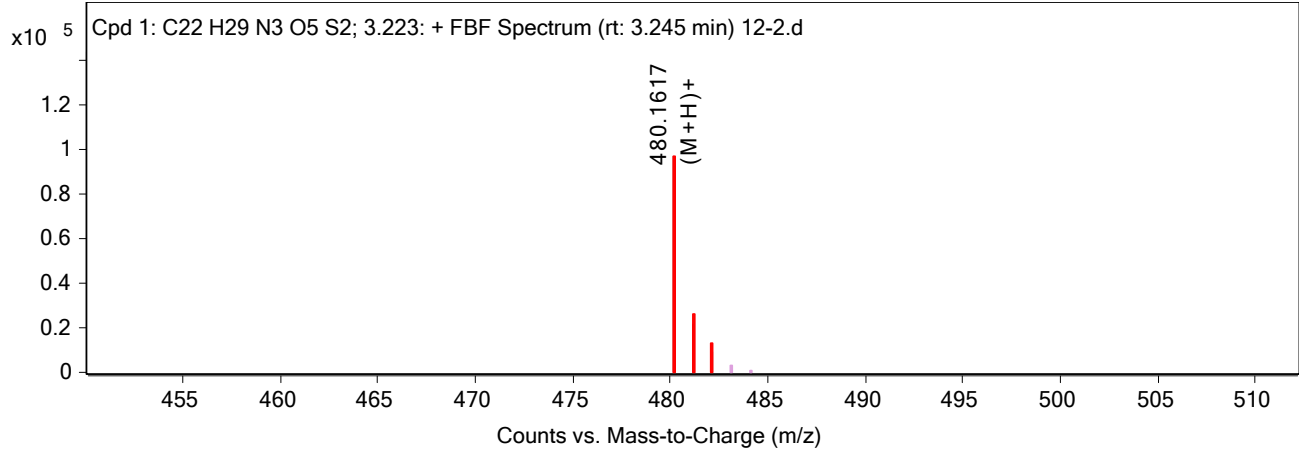

## MS Spectrum Peak List

| Obs. m/z | Charge | Abund    | Ion/Isotope |
|----------|--------|----------|-------------|
| 480.1617 | 1      | 96713.21 | (M+H)+      |
| 481.1644 | 1      | 21765.28 | (M+H)+      |
| 482.161  | 1      | 9451.3   | (M+H)+      |

## MS Zoomed Spectrum

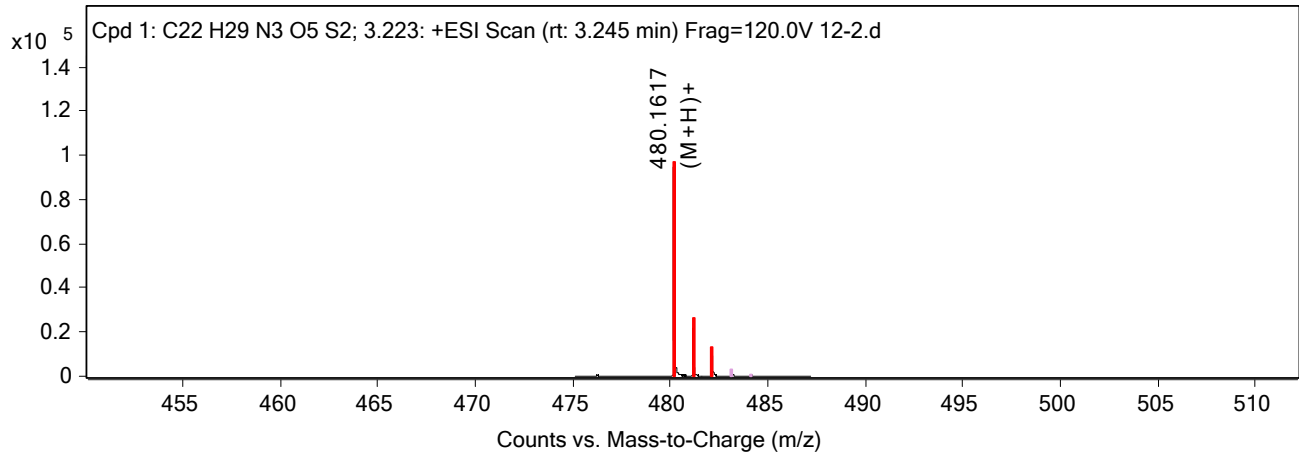

## MS Spectrum Peak List

| Obs. m/z | Charge | Abund    | Ion/Isotope | Tgt Mass Error (ppm) |
|----------|--------|----------|-------------|----------------------|
| 480.1617 | 1      | 96713.21 | (M+H)+      | 0.98                 |
| 480.1617 |        | 96713.21 |             |                      |
| 481.1644 | 1      | 21765.27 | (M+H)+      | 1.44                 |
| 482.161  | 1      | 9451.3   | (M+H)+      | 0.35                 |

--- End Of Report ---



# Target Compound Screening Report

|                                 |                                        |                               |                                                     |
|---------------------------------|----------------------------------------|-------------------------------|-----------------------------------------------------|
| <b>Data File</b>                | 1.d                                    | <b>Sample Name</b>            | H2981851                                            |
| <b>Sample Type</b>              | Sample                                 | <b>Position</b>               | P1-A1                                               |
| <b>Instrument Name</b>          | Instrument 1                           | <b>User Name</b>              | Denis V.Bylina                                      |
| <b>Acq Method</b>               | Fast_Gradient_HRMS_pos_Lock_08272019.m | <b>Acquired Time</b>          | 9/23/2021 6:16:20 PM (UTC+03:00)                    |
| <b>IRM Calibration Status</b>   | Success                                | <b>DA Method</b>              | 1.m                                                 |
| <b>Comment</b>                  |                                        |                               |                                                     |
| <b>Sample Group</b>             |                                        | <b>Info.</b>                  | Agilent 6224 TOF LC/MS                              |
| <b>MFC</b>                      | C21H32N4O6S2                           | <b>Stream Name</b>            | LC 1                                                |
| <b>Acquisition Time (Local)</b> | 9/23/2021 6:16:20 PM (UTC+03:00)       | <b>Acquisition SW Version</b> | 6200 series TOF/6500 series Q-TOF B.08.00 (B8058.0) |
| <b>TOF Driver Version</b>       | 8.00.00                                | <b>TOF Firmware Version</b>   | 8.643                                               |
| <b>Tune Mass Range Max.</b>     | 1700                                   |                               |                                                     |

## Compound Table

| Label                          | Tgt Score | Mass Error (ppm) | Tgt Formula      | Obs. RT | Ref. Mass | Obs. Mass |
|--------------------------------|-----------|------------------|------------------|---------|-----------|-----------|
| Cpd 1: C21 H32 N4 O6 S2; 2.789 | 92.88     | -1.13            | C21 H32 N4 O6 S2 | 2.789   | 500.1763  | 500.1758  |

| Obs. m/z | Obs. RT | Obs. Mass | Tgt Formula      | Tgt Mass | Tgt Mass Error (ppm) | RT Diff.        | Find Cpds Algorithm |
|----------|---------|-----------|------------------|----------|----------------------|-----------------|---------------------|
| 501.183  | 2.789   | 500.1758  | C21 H32 N4 O6 S2 | 500.1763 | -1.13                | Find By Formula |                     |

## Compound Chromatograms

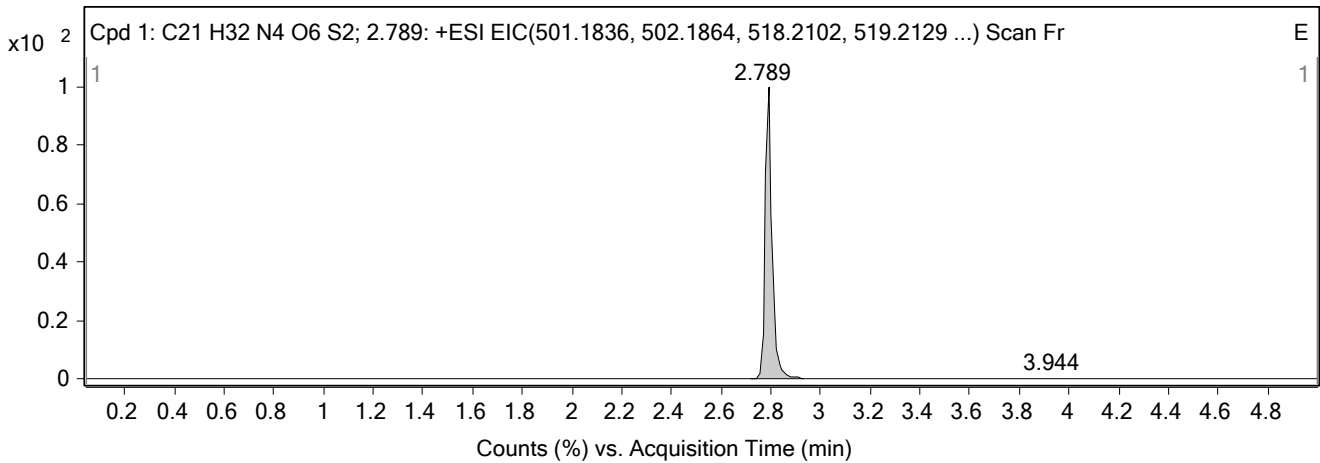

MS Zoomed Spectrum

# Target Compound Screening Report

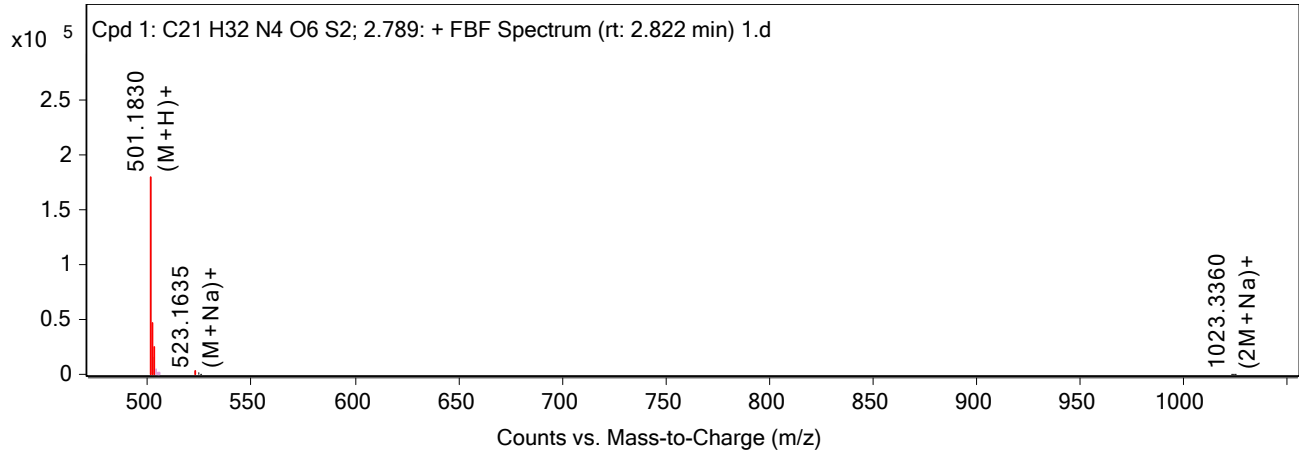

## MS Spectrum Peak List

| Obs. m/z  | Charge | Abund     | Ion/Isotope |
|-----------|--------|-----------|-------------|
| 501.183   | 1      | 179483.88 | (M+H)+      |
| 502.1862  | 1      | 38143.91  | (M+H)+      |
| 503.1821  | 1      | 16147.53  | (M+H)+      |
| 523.1635  | 1      | 2475.8    | (M+Na)+     |
| 524.1696  | 1      | 933.39    | (M+Na)+     |
| 525.1558  | 1      | 347.65    | (M+Na)+     |
| 1023.336  | 1      | 573.57    | (2M+Na)+    |
| 1024.3397 | 1      | 297.71    | (2M+Na)+    |
| 1025.332  | 1      | 180.2     | (2M+Na)+    |

## MS Zoomed Spectrum

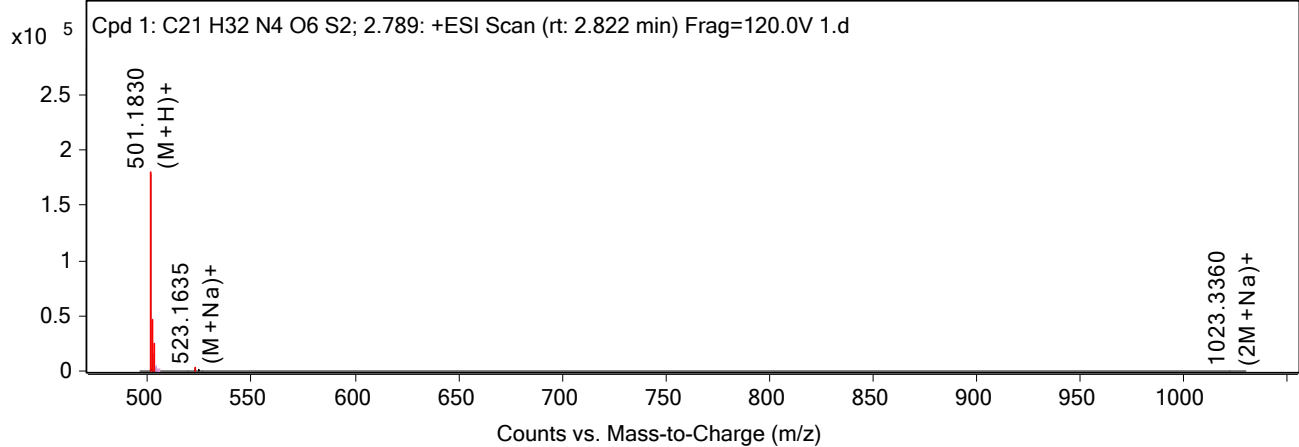

## MS Spectrum Peak List

| Obs. m/z  | Charge | Abund     | Ion/Isotope | Tgt Mass Error (ppm) |
|-----------|--------|-----------|-------------|----------------------|
| 501.183   | 1      | 179483.88 | (M+H)+      | 1.18                 |
| 502.1862  | 1      | 38143.91  | (M+H)+      | 0.37                 |
| 503.1821  | 1      | 16147.53  | (M+H)+      | 0.94                 |
| 523.1635  | 1      | 2475.8    | (M+Na)+     | 3.86                 |
| 524.1696  | 1      | 933.39    | (M+Na)+     | -2.42                |
| 525.1558  | 1      | 347.65    | (M+Na)+     | 16.7                 |
| 1023.336  | 1      | 573.57    | (2M+Na)+    | 5.7                  |
| 1024.3397 | 1      | 297.71    | (2M+Na)+    | 4.9                  |
| 1025.332  | 1      | 180.2     | (2M+Na)+    | 9.97                 |

--- End Of Report ---

# Target Compound Screening Report

|                                 |                                        |                               |                                                     |
|---------------------------------|----------------------------------------|-------------------------------|-----------------------------------------------------|
| <b>Data File</b>                | 6-2.d                                  | <b>Sample Name</b>            | H2980128                                            |
| <b>Sample Type</b>              | Sample                                 | <b>Position</b>               | P1-A6                                               |
| <b>Instrument Name</b>          | Instrument 1                           | <b>User Name</b>              | Denis V.Bylina                                      |
| <b>Acq Method</b>               | Fast_Gradient_HRMS_pos_Lock_08272019.m | <b>Acquired Time</b>          | 9/24/2021 10:38:00 AM (UTC+03:00)                   |
| <b>IRM Calibration Status</b>   | Success                                | <b>DA Method</b>              | 1.m                                                 |
| <b>Comment</b>                  |                                        |                               |                                                     |
| <b>Sample Group</b>             |                                        | <b>Info.</b>                  | Agilent 6224 TOF LC/MS                              |
| <b>MFC</b>                      | C23H29N3O5S2                           | <b>Stream Name</b>            | LC 1                                                |
| <b>Acquisition Time (Local)</b> | 9/24/2021 10:38:00 AM (UTC+03:00)      | <b>Acquisition SW Version</b> | 6200 series TOF/6500 series Q-TOF B.08.00 (B8058.0) |
| <b>TOF Driver Version</b>       | 8.00.00                                | <b>TOF Firmware Version</b>   | 8.643                                               |
| <b>Tune Mass Range Max.</b>     | 1700                                   |                               |                                                     |

## Compound Table

| Label                          | Tgt Score | Mass Error (ppm) | Tgt Formula      | Obs. RT | Ref. Mass | Obs. Mass |
|--------------------------------|-----------|------------------|------------------|---------|-----------|-----------|
| Cpd 1: C23 H29 N3 O5 S2; 3.272 | 94.09     | -2.11            | C23 H29 N3 O5 S2 | 3.272   | 491.1549  | 491.1538  |

| Obs. m/z | Obs. RT | Obs. Mass | Tgt Formula      | Tgt Mass | Tgt Mass Error (ppm) | RT Diff.        | Find Cpds Algorithm |
|----------|---------|-----------|------------------|----------|----------------------|-----------------|---------------------|
| 492.1613 | 3.272   | 491.1538  | C23 H29 N3 O5 S2 | 491.1549 | -2.11                | Find By Formula |                     |

## Compound Chromatograms

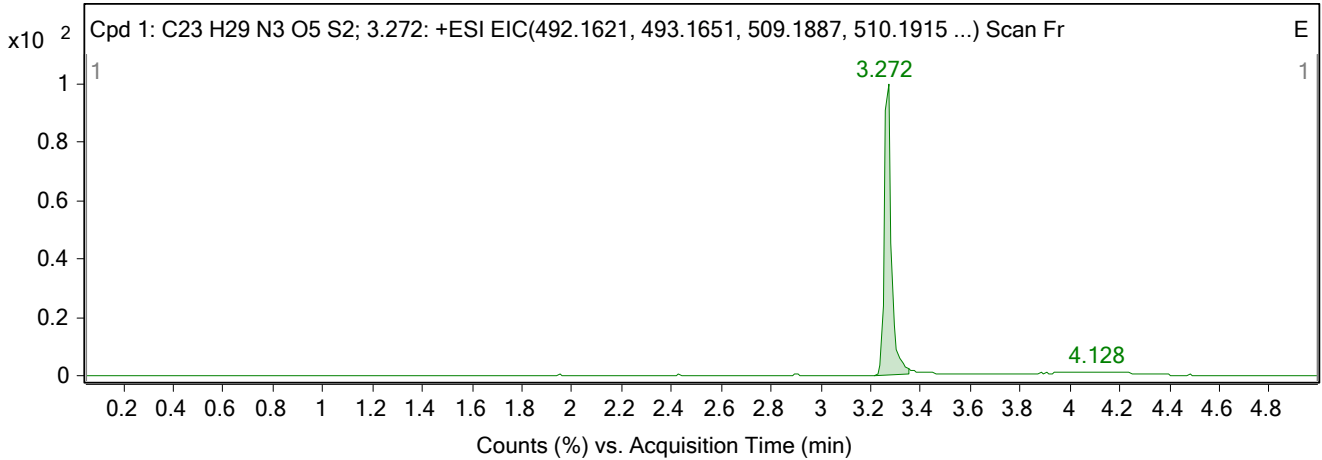

MS Zoomed Spectrum

# Target Compound Screening Report

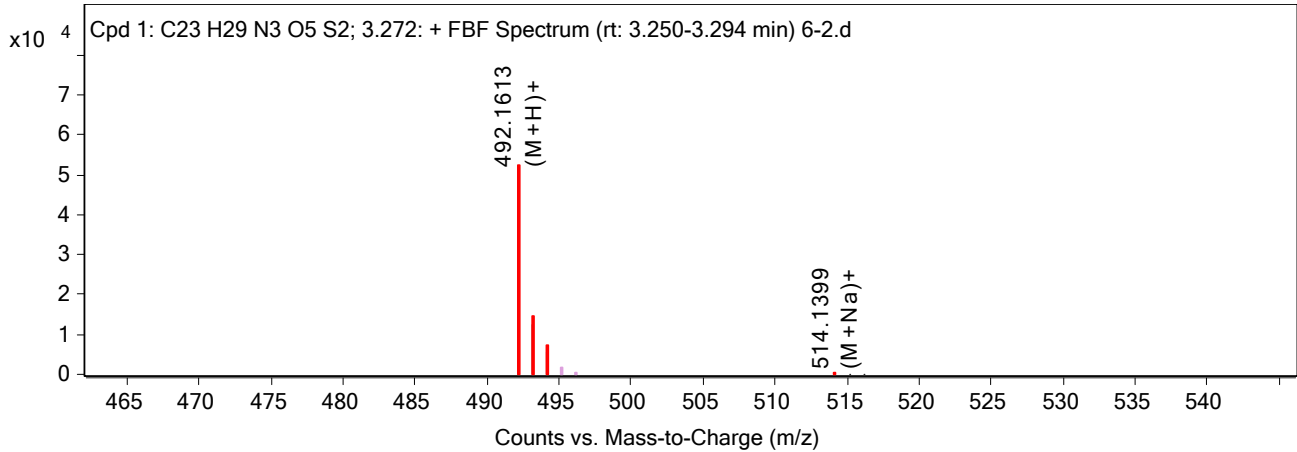

## MS Spectrum Peak List

| Obs. m/z | Charge | Abund    | Ion/Isotope |
|----------|--------|----------|-------------|
| 492.1613 | 1      | 52308.46 | (M+H)+      |
| 493.1636 | 1      | 12494.91 | (M+H)+      |
| 494.1601 | 1      | 5416.83  | (M+H)+      |
| 514.1399 | 1      | 261.42   | (M+Na)+     |
| 515.1414 | 1      | 113.3    | (M+Na)+     |
| 516.1404 | 1      | 69.64    | (M+Na)+     |

## MS Zoomed Spectrum

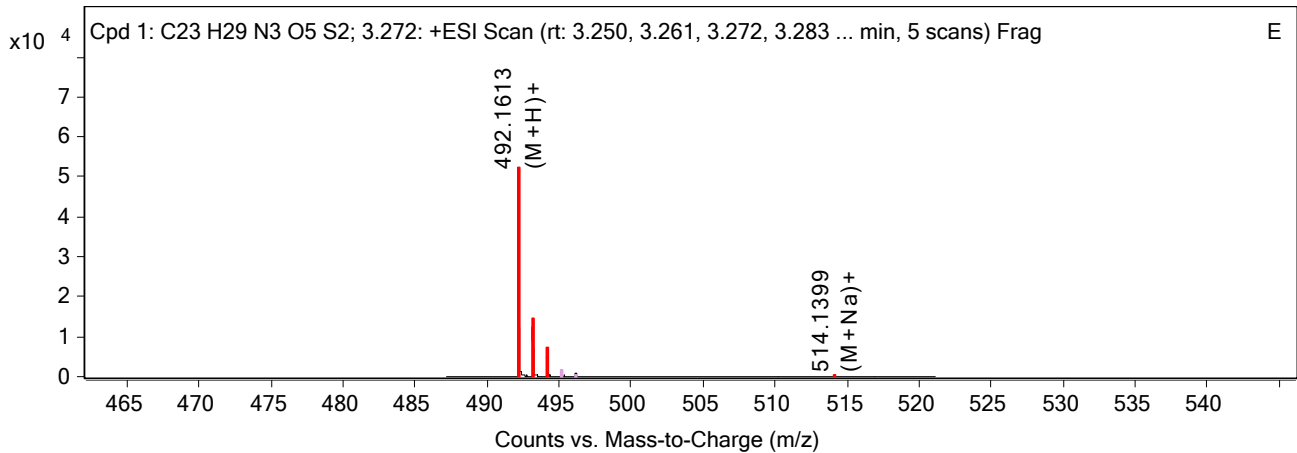

## MS Spectrum Peak List

| Obs. m/z | Charge | Abund    | Ion/Isotope | Tgt Mass Error (ppm) |
|----------|--------|----------|-------------|----------------------|
| 492.1613 | 1      | 52308.46 | (M+H)+      | 1.8                  |
| 492.1613 |        | 52308.46 |             |                      |
| 493.1636 | 1      | 12494.91 | (M+H)+      | 2.99                 |
| 494.1601 | 1      | 5416.83  | (M+H)+      | 2.46                 |
| 514.1399 | 1      | 261.42   | (M+Na)+     | 8.12                 |
| 515.1414 | 1      | 113.3    | (M+Na)+     | 10.87                |
| 516.1404 | 1      | 69.64    | (M+Na)+     | 5.67                 |

--- End Of Report ---

# Target Compound Screening Report

|                                 |                                        |                               |                                                     |
|---------------------------------|----------------------------------------|-------------------------------|-----------------------------------------------------|
| <b>Data File</b>                | 39.d                                   | <b>Sample Name</b>            | H2974026                                            |
| <b>Sample Type</b>              | Sample                                 | <b>Position</b>               | P1-E3                                               |
| <b>Instrument Name</b>          | Instrument 1                           | <b>User Name</b>              | Denis V.Bylina                                      |
| <b>Acq Method</b>               | Fast_Gradient_HRMS_pos_Lock_08272019.m | <b>Acquired Time</b>          | 9/22/2021 5:18:58 PM (UTC+03:00)                    |
| <b>IRM Calibration Status</b>   | Success                                | <b>DA Method</b>              | 1.m                                                 |
| <b>Comment</b>                  |                                        |                               |                                                     |
| <b>Sample Group</b>             |                                        | <b>Info.</b>                  | Agilent 6224 TOF LC/MS                              |
| <b>MFC</b>                      | C24H36N2O5S                            | <b>Stream Name</b>            | LC 1                                                |
| <b>Acquisition Time (Local)</b> | 9/22/2021 5:18:58 PM (UTC+03:00)       | <b>Acquisition SW Version</b> | 6200 series TOF/6500 series Q-TOF B.08.00 (B8058.0) |
| <b>TOF Driver Version</b>       | 8.00.00                                | <b>TOF Firmware Version</b>   | 8.643                                               |
| <b>Tune Mass Range Max.</b>     | 1700                                   |                               |                                                     |

## Compound Table

| Label                         | Tgt Score | Mass Error (ppm) | Tgt Formula     | Obs. RT | Ref. Mass | Obs. Mass |
|-------------------------------|-----------|------------------|-----------------|---------|-----------|-----------|
| Cpd 1: C24 H36 N2 O5 S; 3.781 | 96.79     | -0.4             | C24 H36 N2 O5 S | 3.781   | 464.2345  | 464.2343  |

| Obs. m/z | Obs. RT | Obs. Mass | Tgt Formula     | Tgt Mass | Tgt Mass Error (ppm) | RT Diff.        | Find Cpds Algorithm |
|----------|---------|-----------|-----------------|----------|----------------------|-----------------|---------------------|
| 487.2242 | 3.781   | 464.2343  | C24 H36 N2 O5 S | 464.2345 | -0.4                 | Find By Formula |                     |

## Compound Chromatograms

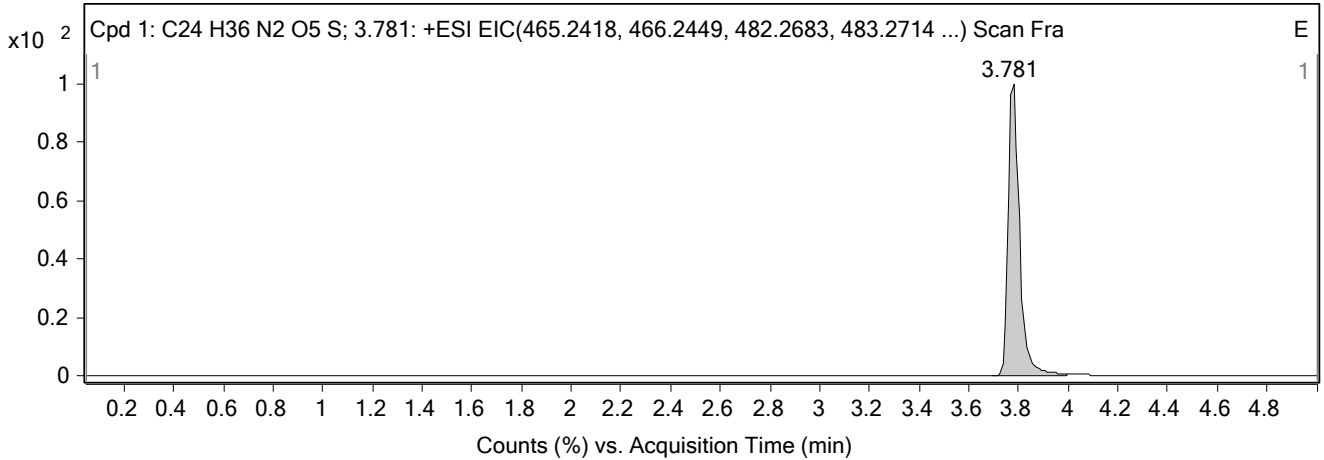

MS Zoomed Spectrum

# Target Compound Screening Report

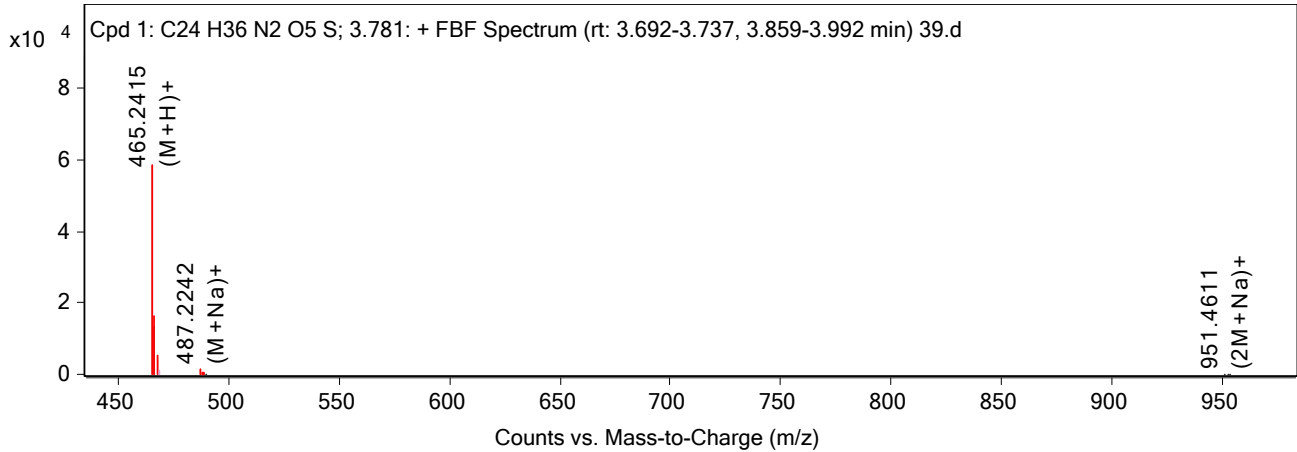

## MS Spectrum Peak List

| Obs. m/z | Charge | Abund    | Ion/Isotope |
|----------|--------|----------|-------------|
| 465.2415 | 1      | 58522.44 | (M+H)+      |
| 466.2445 | 1      | 13513.19 | (M+H)+      |
| 467.2435 | 1      | 4099.84  | (M+H)+      |
| 487.2242 | 1      | 1585.76  | (M+Na)+     |
| 488.2264 | 1      | 485.3    | (M+Na)+     |
| 489.2247 | 1      | 183.57   | (M+Na)+     |
| 951.4611 | 1      | 159.12   | (2M+Na)+    |
| 952.4589 | 1      | 109.36   | (2M+Na)+    |
| 953.4572 | 1      | 80.07    | (2M+Na)+    |

## MS Zoomed Spectrum

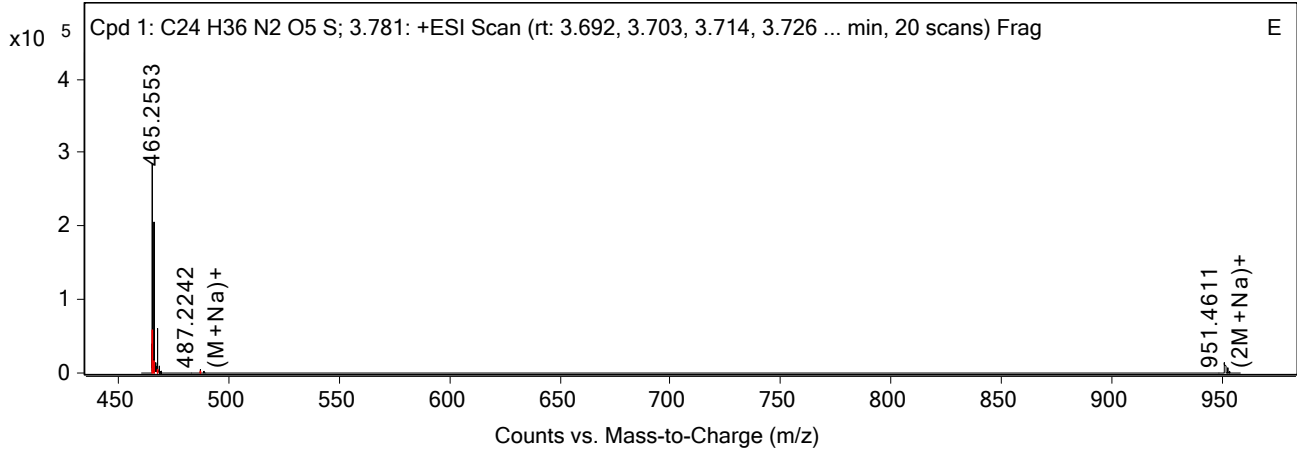

## MS Spectrum Peak List

| Obs. m/z | Charge | Abund     | Ion/Isotope | Tgt Mass Error (ppm) |
|----------|--------|-----------|-------------|----------------------|
| 465.2415 | 1      | 58522.44  | (M+H)+      | 0.48                 |
| 465.2553 |        | 284031.68 |             |                      |
| 466.2445 | 1      | 13513.19  | (M+H)+      | 0.8                  |
| 467.2435 | 1      | 4099.84   | (M+H)+      | -1.46                |
| 487.2242 | 1      | 1585.76   | (M+Na)+     | -1.02                |
| 488.2264 | 1      | 485.3     | (M+Na)+     | 0.87                 |
| 489.2247 | 1      | 183.57    | (M+Na)+     | -0.01                |
| 951.4611 | 1      | 159.12    | (2M+Na)+    | -3.09                |
| 952.4589 | 1      | 109.36    | (2M+Na)+    | 2.6                  |
| 953.4572 | 1      | 80.07     | (2M+Na)+    | 3.71                 |

--- End Of Report ---

# Target Compound Screening Report

|                                 |                                        |                               |                                                     |
|---------------------------------|----------------------------------------|-------------------------------|-----------------------------------------------------|
| <b>Data File</b>                | 24.d                                   | <b>Sample Name</b>            | H3000295                                            |
| <b>Sample Type</b>              | Sample                                 | <b>Position</b>               | P1-C6                                               |
| <b>Instrument Name</b>          | Instrument 1                           | <b>User Name</b>              | Denis V.Bylina                                      |
| <b>Acq Method</b>               | Fast_Gradient_HRMS_pos_Lock_08272019.m | <b>Acquired Time</b>          | 9/22/2021 3:55:41 PM (UTC+03:00)                    |
| <b>IRM Calibration Status</b>   | Success                                | <b>DA Method</b>              | 1.m                                                 |
| <b>Comment</b>                  |                                        |                               |                                                     |
| <b>Sample Group</b>             |                                        | <b>Info.</b>                  | Agilent 6224 TOF LC/MS                              |
| <b>MFC</b>                      | C24H25N5O3                             | <b>Stream Name</b>            | LC 1                                                |
| <b>Acquisition Time (Local)</b> | 9/22/2021 3:55:41 PM (UTC+03:00)       | <b>Acquisition SW Version</b> | 6200 series TOF/6500 series Q-TOF B.08.00 (B8058.0) |
| <b>TOF Driver Version</b>       | 8.00.00                                | <b>TOF Firmware Version</b>   | 8.643                                               |
| <b>Tune Mass Range Max.</b>     | 1700                                   |                               |                                                     |

## Compound Table

| Label                       | Tgt Score | Mass Error (ppm) | Tgt Formula   | Obs. RT | Ref. Mass | Obs. Mass |
|-----------------------------|-----------|------------------|---------------|---------|-----------|-----------|
| Cpd 1: C24 H25 N5 O3; 2.777 | 98.45     | -1.3             | C24 H25 N5 O3 | 2.777   | 431.1957  | 431.1952  |

| Obs. m/z | Obs. RT | Obs. Mass | Tgt Formula   | Tgt Mass | Tgt Mass Error (ppm) | RT Diff.        | Find Cpd Algorithm |
|----------|---------|-----------|---------------|----------|----------------------|-----------------|--------------------|
| 454.1841 | 2.777   | 431.1952  | C24 H25 N5 O3 | 431.1957 | -1.3                 | Find By Formula |                    |

## Compound Chromatograms

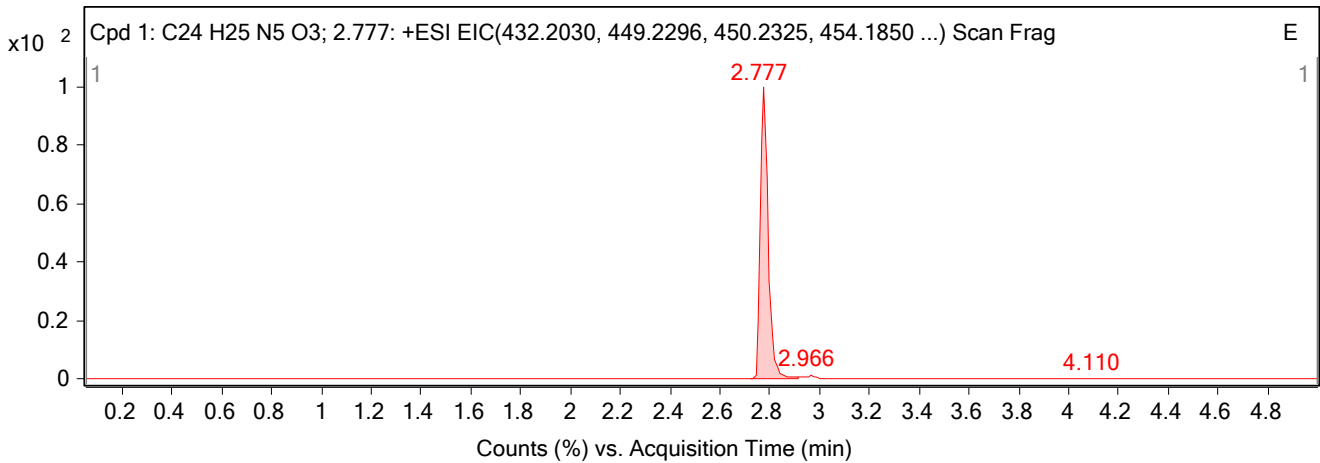

MS Zoomed Spectrum

# Target Compound Screening Report

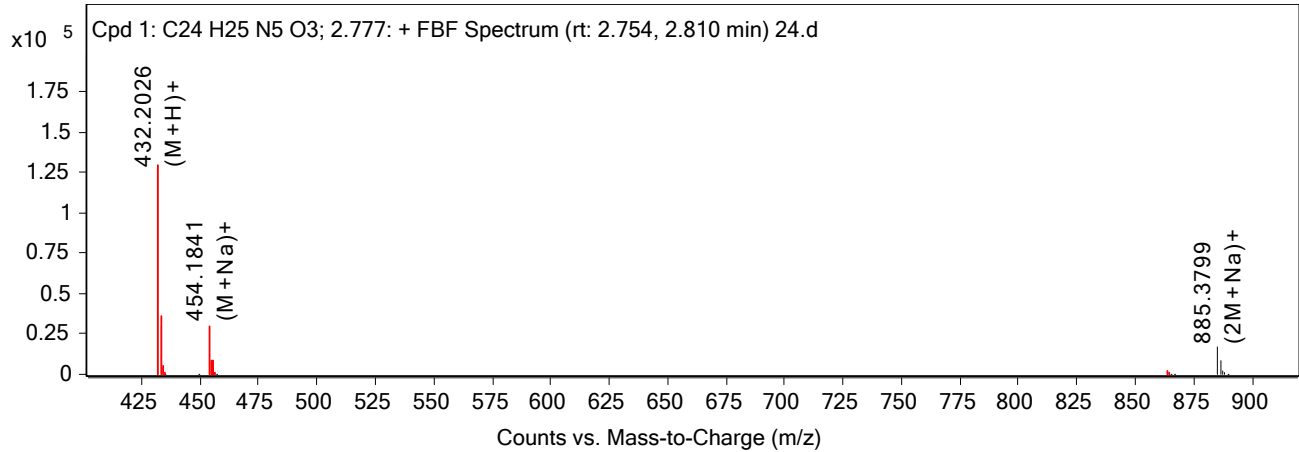

## MS Spectrum Peak List

| Obs. m/z | Charge | Abund     | Ion/Isotope |
|----------|--------|-----------|-------------|
| 432.2026 | 1      | 129515.03 | (M+H)+      |
| 433.2055 | 1      | 30015.54  | (M+H)+      |
| 434.2084 | 1      | 4094.67   | (M+H)+      |
| 454.1841 | 1      | 30002.59  | (M+Na)+     |
| 455.188  | 1      | 7843.45   | (M+Na)+     |
| 863.3957 | 1      | 2510.33   | (2M+H)+     |
| 864.3998 | 1      | 1447.51   | (2M+H)+     |
| 885.3799 | 1      | 16570.65  | (2M+Na)+    |
| 886.3822 | 1      | 8850.51   | (2M+Na)+    |
| 887.389  | 1      | 2685.03   | (2M+Na)+    |

## MS Zoomed Spectrum

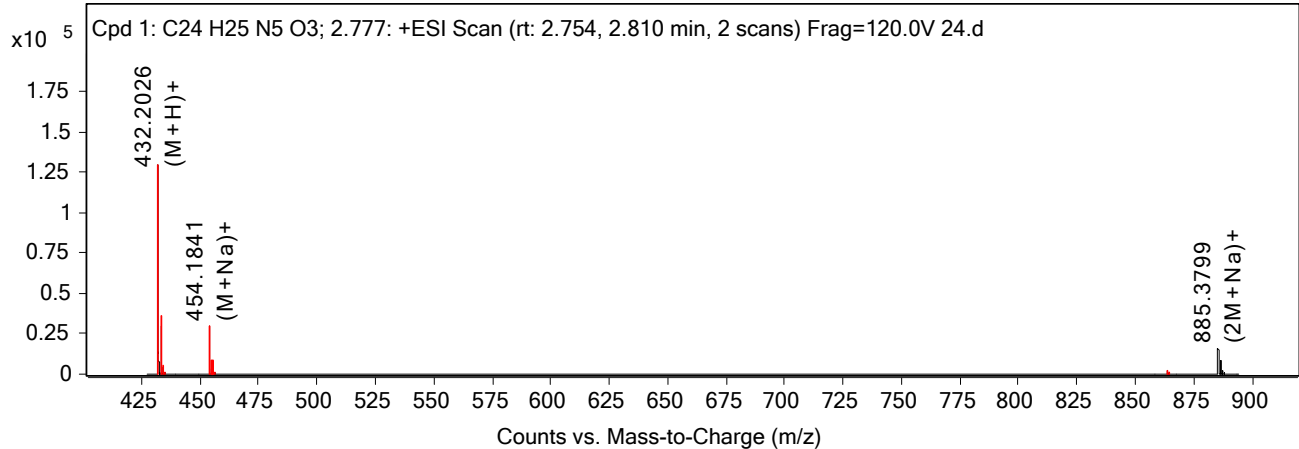

## MS Spectrum Peak List

| Obs. m/z | Charge | Abund     | Ion/Isotope | Tgt Mass Error (ppm) |
|----------|--------|-----------|-------------|----------------------|
| 432.2026 | 1      | 129515.03 | (M+H)+      | 1.05                 |
| 433.2055 | 1      | 30015.54  | (M+H)+      | 1.11                 |
| 434.2084 | 1      | 4094.67   | (M+H)+      | 0.67                 |
| 454.1841 | 1      | 30002.59  | (M+Na)+     | 1.8                  |
| 455.188  | 1      | 7843.45   | (M+Na)+     | -0.08                |
| 863.3957 | 1      | 2510.33   | (2M+H)+     | 3.59                 |
| 864.3998 | 1      | 1447.51   | (2M+H)+     | 2.21                 |
| 885.3799 | 1      | 16570.65  | (2M+Na)+    | 0.87                 |
| 886.3822 | 1      | 8850.51   | (2M+Na)+    | 1.65                 |
| 887.389  | 1      | 2685.03   | (2M+Na)+    | -2.79                |

--- End Of Report ---



# Target Compound Screening Report

|                                 |                                        |                               |                                                     |
|---------------------------------|----------------------------------------|-------------------------------|-----------------------------------------------------|
| <b>Data File</b>                | 33.d                                   | <b>Sample Name</b>            | H2990793                                            |
| <b>Sample Type</b>              | Sample                                 | <b>Position</b>               | P1-D6                                               |
| <b>Instrument Name</b>          | Instrument 1                           | <b>User Name</b>              | Denis V.Bylina                                      |
| <b>Acq Method</b>               | Fast_Gradient_HRMS_pos_Lock_08272019.m | <b>Acquired Time</b>          | 9/23/2021 2:14:21 PM (UTC+03:00)                    |
| <b>IRM Calibration Status</b>   | Success                                | <b>DA Method</b>              | 1.m                                                 |
| <b>Comment</b>                  |                                        |                               |                                                     |
| <b>Sample Group</b>             |                                        | <b>Info.</b>                  | Agilent 6224 TOF LC/MS                              |
| <b>MFC</b>                      | C23H22FN5O4                            | <b>Stream Name</b>            | LC 1                                                |
| <b>Acquisition Time (Local)</b> | 9/23/2021 2:14:21 PM (UTC+03:00)       | <b>Acquisition SW Version</b> | 6200 series TOF/6500 series Q-TOF B.08.00 (B8058.0) |
| <b>TOF Driver Version</b>       | 8.00.00                                | <b>TOF Firmware Version</b>   | 8.643                                               |
| <b>Tune Mass Range Max.</b>     | 1700                                   |                               |                                                     |

## Compound Table

| Label                         | Tgt Score | Mass Error (ppm) | Tgt Formula     | Obs. RT | Ref. Mass | Obs. Mass |
|-------------------------------|-----------|------------------|-----------------|---------|-----------|-----------|
| Cpd 1: C23 H22 F N5 O4; 2.642 | 99.22     | -1.86            | C23 H22 F N5 O4 | 2.642   | 451.1656  | 451.1647  |

| Obs. m/z | Obs. RT | Obs. Mass | Tgt Formula     | Tgt Mass | Tgt Mass Error (ppm) | RT Diff.        | Find Cpds Algorithm |
|----------|---------|-----------|-----------------|----------|----------------------|-----------------|---------------------|
| 474.1542 | 2.642   | 451.1647  | C23 H22 F N5 O4 | 451.1656 | -1.86                | Find By Formula |                     |

## Compound Chromatograms

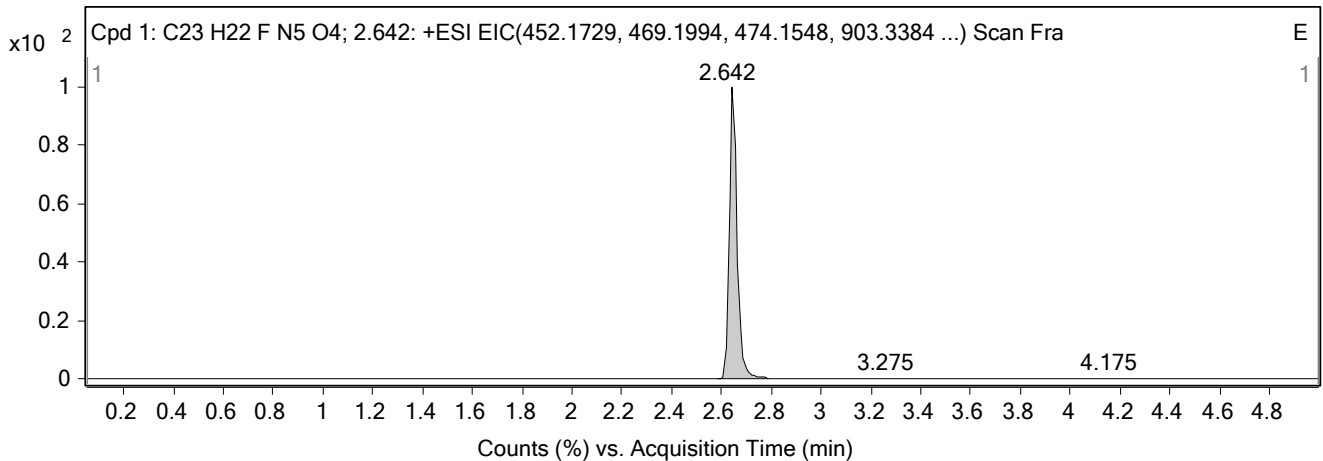

MS Zoomed Spectrum

# Target Compound Screening Report

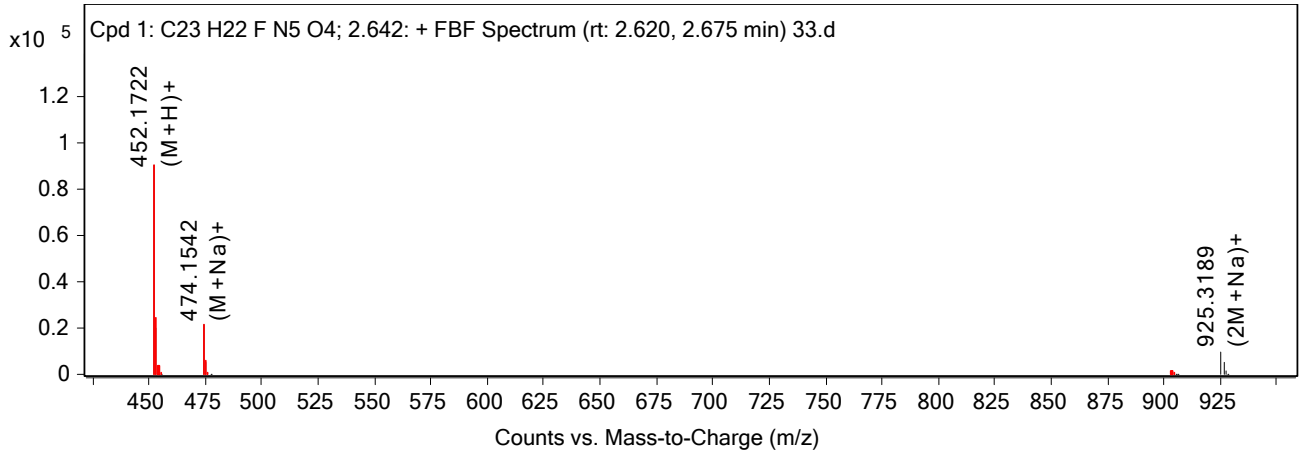

## MS Spectrum Peak List

| Obs. m/z | Charge | Abund    | Ion/Isotope |
|----------|--------|----------|-------------|
| 452.1722 | 1      | 90265.47 | (M+H)+      |
| 453.1748 | 1      | 19805.79 | (M+H)+      |
| 454.1774 | 1      | 3108.79  | (M+H)+      |
| 474.1542 | 1      | 21409.36 | (M+Na)+     |
| 475.1574 | 1      | 5457.98  | (M+Na)+     |
| 476.1605 | 1      | 898.78   | (M+Na)+     |
| 903.3347 | 1      | 1608.19  | (2M+H)+     |
| 925.3189 | 1      | 9933.19  | (2M+Na)+    |
| 926.3214 | 1      | 5580.23  | (2M+Na)+    |
| 927.325  | 1      | 1516.13  | (2M+Na)+    |

## MS Zoomed Spectrum

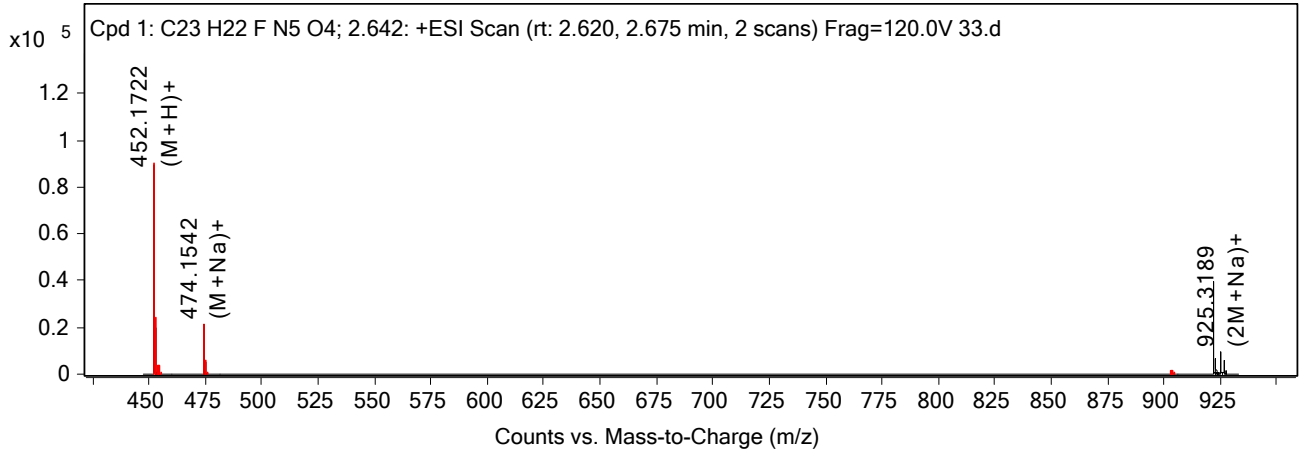

## MS Spectrum Peak List

| Obs. m/z | Charge | Abund    | Ion/Isotope | Tgt Mass Error (ppm) |
|----------|--------|----------|-------------|----------------------|
| 452.1722 | 1      | 90265.47 | (M+H)+      | 1.44                 |
| 453.1748 | 1      | 19805.79 | (M+H)+      | 2.3                  |
| 454.1774 | 1      | 3108.79  | (M+H)+      | 2.23                 |
| 474.1542 | 1      | 21409.36 | (M+Na)+     | 1.34                 |
| 475.1574 | 1      | 5457.98  | (M+Na)+     | 0.8                  |
| 476.1605 | 1      | 898.78   | (M+Na)+     | -0.14                |
| 903.3347 | 1      | 1608.19  | (2M+H)+     | 4.14                 |
| 925.3189 | 1      | 9933.19  | (2M+Na)+    | 1.55                 |
| 926.3214 | 1      | 5580.23  | (2M+Na)+    | 2.06                 |
| 927.325  | 1      | 1516.13  | (2M+Na)+    | 1.19                 |

--- End Of Report ---

# Target Compound Screening Report

|                                 |                                        |                               |                                                     |
|---------------------------------|----------------------------------------|-------------------------------|-----------------------------------------------------|
| <b>Data File</b>                | 33.d                                   | <b>Sample Name</b>            | H2976998                                            |
| <b>Sample Type</b>              | Sample                                 | <b>Position</b>               | P1-D6                                               |
| <b>Instrument Name</b>          | Instrument 1                           | <b>User Name</b>              | Denis V.Bylina                                      |
| <b>Acq Method</b>               | Fast_Gradient_HRMS_pos_Lock_08272019.m | <b>Acquired Time</b>          | 9/22/2021 4:45:42 PM (UTC+03:00)                    |
| <b>IRM Calibration Status</b>   | Success                                | <b>DA Method</b>              | 1.m                                                 |
| <b>Comment</b>                  |                                        |                               |                                                     |
| <b>Sample Group</b>             |                                        | <b>Info.</b>                  | Agilent 6224 TOF LC/MS                              |
| <b>MFC</b>                      | C26H30N4O2                             | <b>Stream Name</b>            | LC 1                                                |
| <b>Acquisition Time (Local)</b> | 9/22/2021 4:45:42 PM (UTC+03:00)       | <b>Acquisition SW Version</b> | 6200 series TOF/6500 series Q-TOF B.08.00 (B8058.0) |
| <b>TOF Driver Version</b>       | 8.00.00                                | <b>TOF Firmware Version</b>   | 8.643                                               |
| <b>Tune Mass Range Max.</b>     | 1700                                   |                               |                                                     |

### Compound Table

| Label                       | Tgt Score | Mass Error (ppm) | Tgt Formula   | Obs. RT | Ref. Mass | Obs. Mass |
|-----------------------------|-----------|------------------|---------------|---------|-----------|-----------|
| Cpd 1: C26 H30 N4 O2; 3.389 | 97.37     | -0.62            | C26 H30 N4 O2 | 3.389   | 430.2369  | 430.2366  |

| Obs. m/z | Obs. RT | Obs. Mass | Tgt Formula   | Tgt Mass | Tgt Mass Error (ppm) | RT Diff.        | Find Cpds Algorithm |
|----------|---------|-----------|---------------|----------|----------------------|-----------------|---------------------|
| 431.2439 | 3.389   | 430.2366  | C26 H30 N4 O2 | 430.2369 | -0.62                | Find By Formula |                     |

### Compound Chromatograms

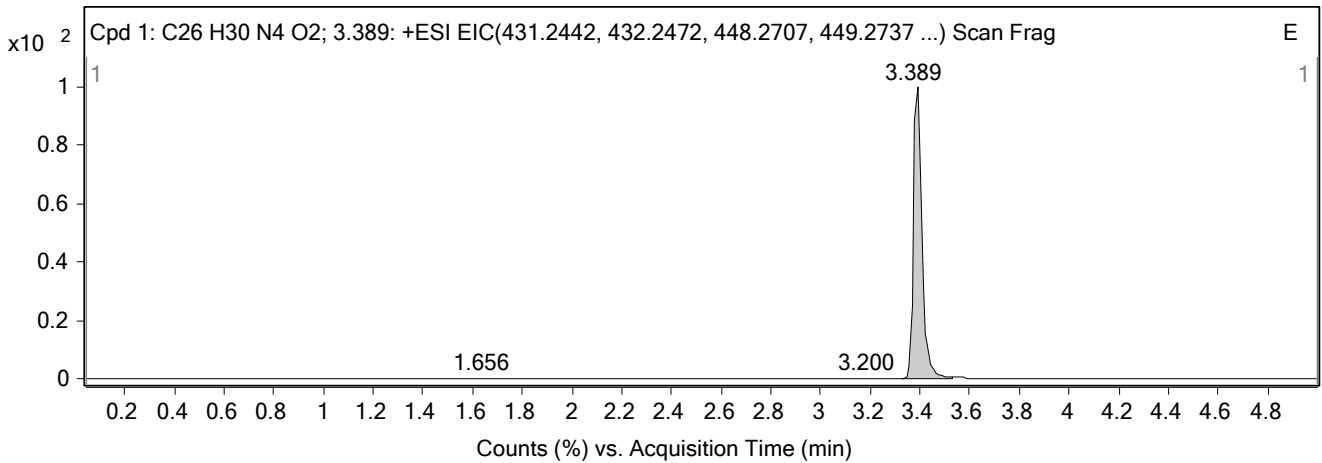

MS Zoomed Spectrum

# Target Compound Screening Report

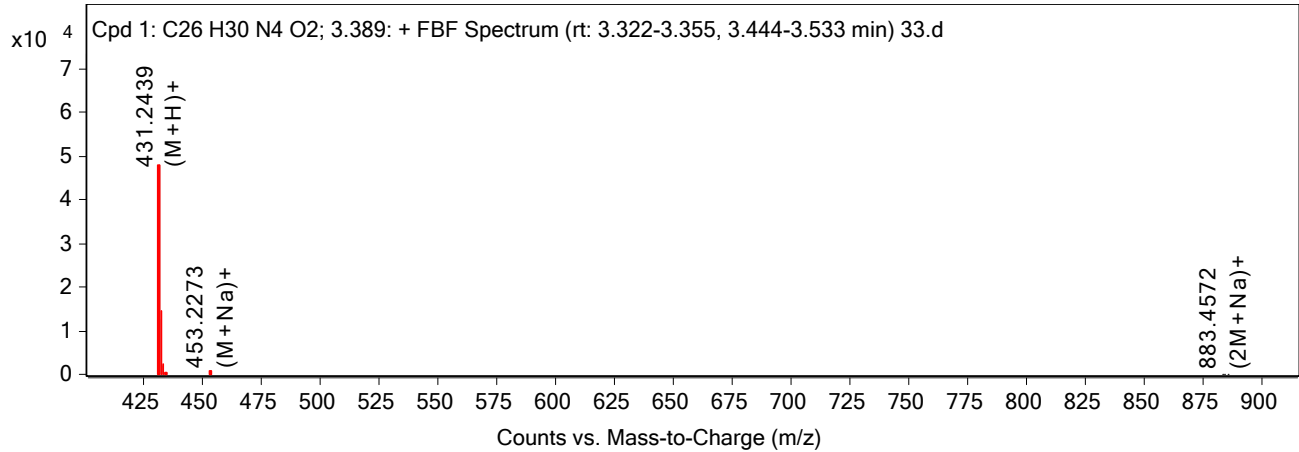

## MS Spectrum Peak List

| Obs. m/z | Charge | Abund    | Ion/Isotope |
|----------|--------|----------|-------------|
| 431.2439 | 1      | 47804.26 | (M+H)+      |
| 432.247  | 1      | 12436.5  | (M+H)+      |
| 433.2498 | 1      | 1944.15  | (M+H)+      |
| 434.2525 | 1      | 259.19   | (M+H)+      |
| 453.2273 | 1      | 590.08   | (M+Na)+     |
| 883.4572 | 1      | 213.24   | (2M+Na)+    |
| 884.4626 | 1      | 122.24   | (2M+Na)+    |
| 885.468  | 1      | 66.55    | (2M+Na)+    |

## MS Zoomed Spectrum

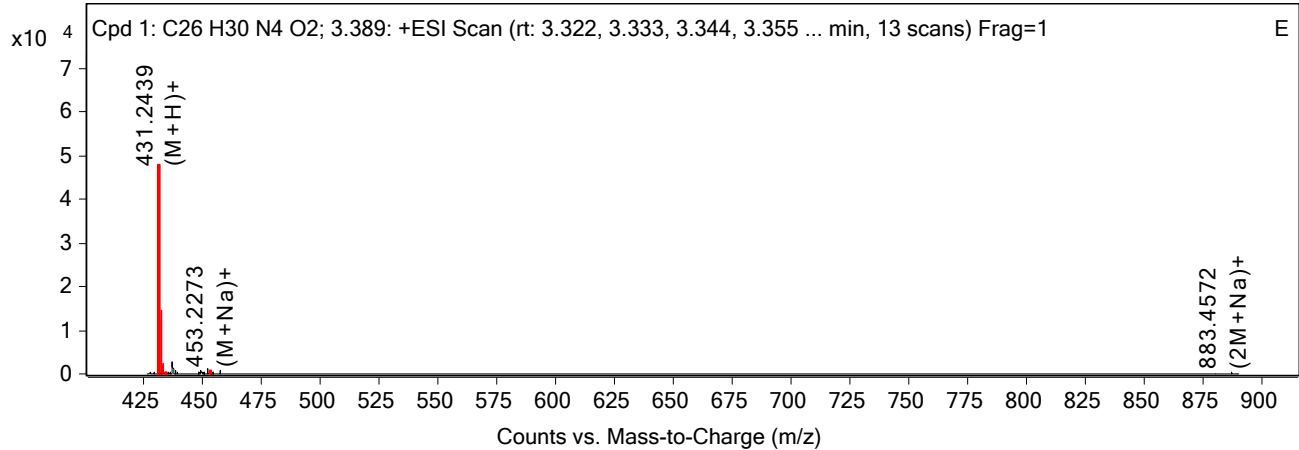

## MS Spectrum Peak List

| Obs. m/z | Charge | Abund    | Ion/Isotope | Tgt Mass Error (ppm) |
|----------|--------|----------|-------------|----------------------|
| 431.2439 | 1      | 47804.26 | (M+H)+      | 0.59                 |
| 431.2439 | 1      | 47804.26 | (M+H)+      |                      |
| 432.247  | 1      | 12436.5  | (M+H)+      | 0.5                  |
| 433.2498 | 1      | 1944.15  | (M+H)+      | 0.84                 |
| 434.2525 | 1      | 259.19   | (M+H)+      | 1.1                  |
| 453.2273 | 1      | 590.08   | (M+Na)+     | -2.67                |
| 883.4572 | 1      | 213.24   | (2M+Na)+    | 6.55                 |
| 884.4626 | 1      | 122.24   | (2M+Na)+    | 3.93                 |
| 885.468  | 1      | 66.55    | (2M+Na)+    | 1.22                 |

--- End Of Report ---

# Target Compound Screening Report

|                                 |                                        |                               |                                                     |
|---------------------------------|----------------------------------------|-------------------------------|-----------------------------------------------------|
| <b>Data File</b>                | 22.d                                   | <b>Sample Name</b>            | H2997982                                            |
| <b>Sample Type</b>              | Sample                                 | <b>Position</b>               | P1-C4                                               |
| <b>Instrument Name</b>          | Instrument 1                           | <b>User Name</b>              | Denis V.Bylina                                      |
| <b>Acq Method</b>               | Fast_Gradient_HRMS_pos_Lock_08272019.m | <b>Acquired Time</b>          | 9/22/2021 3:44:35 PM (UTC+03:00)                    |
| <b>IRM Calibration Status</b>   | Success                                | <b>DA Method</b>              | 1.m                                                 |
| <b>Comment</b>                  |                                        |                               |                                                     |
| <b>Sample Group</b>             |                                        | <b>Info.</b>                  | Agilent 6224 TOF LC/MS                              |
| <b>MFC</b>                      | C24H25FN4O4                            | <b>Stream Name</b>            | LC 1                                                |
| <b>Acquisition Time (Local)</b> | 9/22/2021 3:44:35 PM (UTC+03:00)       | <b>Acquisition SW Version</b> | 6200 series TOF/6500 series Q-TOF B.08.00 (B8058.0) |
| <b>TOF Driver Version</b>       | 8.00.00                                | <b>TOF Firmware Version</b>   | 8.643                                               |
| <b>Tune Mass Range Max.</b>     | 1700                                   |                               |                                                     |

### Compound Table

| Label                         | Tgt Score | Mass Error (ppm) | Tgt Formula     | Obs. RT | Ref. Mass | Obs. Mass |
|-------------------------------|-----------|------------------|-----------------|---------|-----------|-----------|
| Cpd 1: C24 H25 F N4 O4; 2.966 | 97.37     | -0.93            | C24 H25 F N4 O4 | 2.966   | 452.186   | 452.1856  |

| Obs. m/z | Obs. RT | Obs. Mass | Tgt Formula     | Tgt Mass | Tgt Mass Error (ppm) | RT Diff.        | Find Cpd Algorithm |
|----------|---------|-----------|-----------------|----------|----------------------|-----------------|--------------------|
| 475.1739 | 2.966   | 452.1856  | C24 H25 F N4 O4 | 452.186  | -0.93                | Find By Formula |                    |

### Compound Chromatograms

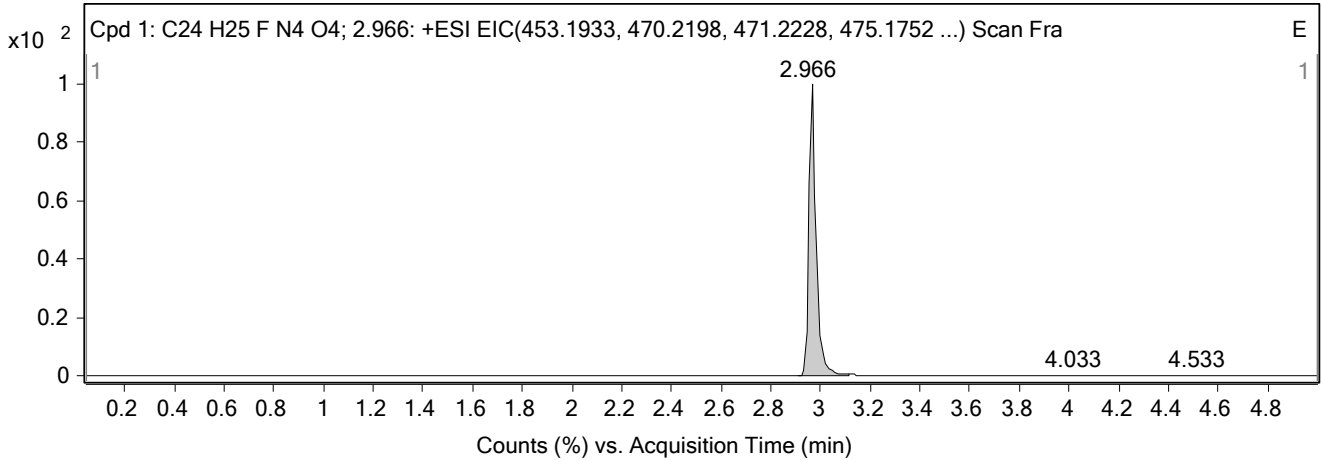

MS Zoomed Spectrum

# Target Compound Screening Report

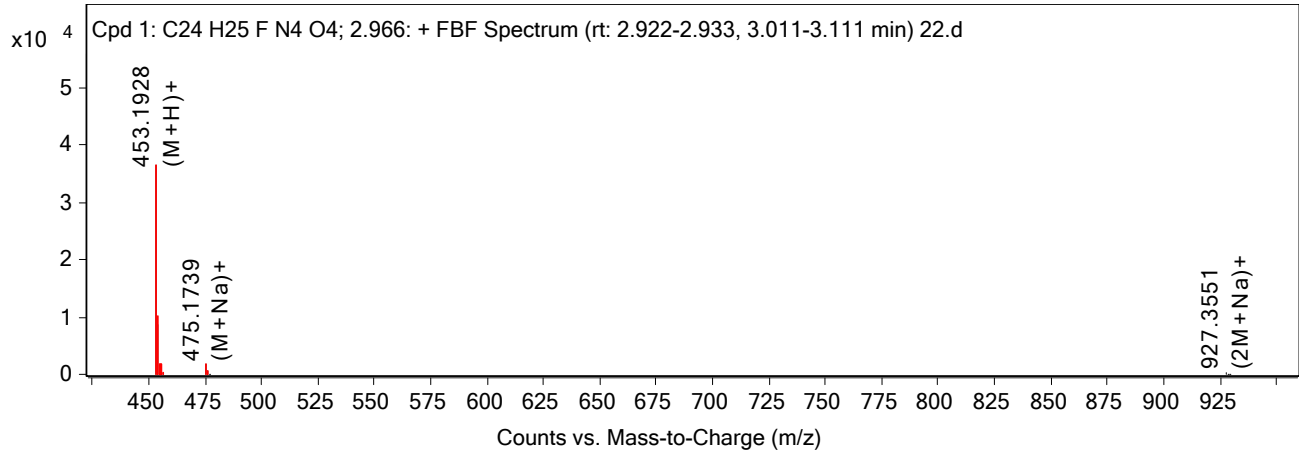

### MS Spectrum Peak List

| Obs. m/z | Charge | Abund    | Ion/Isotope |
|----------|--------|----------|-------------|
| 453.1928 | 1      | 36475.39 | (M+H)+      |
| 454.1961 | 1      | 8699.07  | (M+H)+      |
| 455.1992 | 1      | 1415.51  | (M+H)+      |
| 456.2026 | 1      | 168.28   | (M+H)+      |
| 475.1739 | 1      | 1792.66  | (M+Na)+     |
| 476.1782 | 1      | 519.44   | (M+Na)+     |
| 477.1807 | 1      | 108.92   | (M+Na)+     |
| 927.3551 | 1      | 258.7    | (2M+Na)+    |
| 928.3622 | 1      | 147.77   | (2M+Na)+    |
| 929.3845 | 1      | 60.49    | (2M+Na)+    |

### MS Zoomed Spectrum

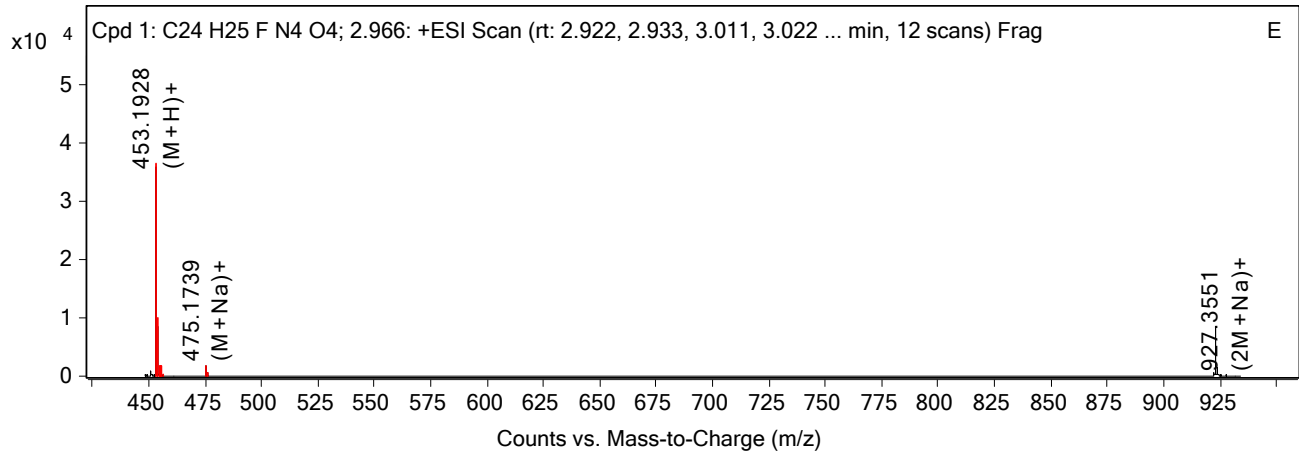

### MS Spectrum Peak List

| Obs. m/z | Charge | Abund   | Ion/Isotope | Tgt Mass Error (ppm) |
|----------|--------|---------|-------------|----------------------|
| 453.1928 | 1      | 36475.4 | (M+H)+      | 0.97                 |
| 454.1961 | 1      | 8699.07 | (M+H)+      | 0.51                 |
| 455.1992 | 1      | 1415.51 | (M+H)+      | -0.37                |
| 456.2026 | 1      | 168.28  | (M+H)+      | -2.07                |
| 475.1739 | 1      | 1792.66 | (M+Na)+     | 2.83                 |
| 476.1782 | 1      | 519.44  | (M+Na)+     | 0.09                 |
| 477.1807 | 1      | 108.92  | (M+Na)+     | 0.48                 |
| 927.3551 | 1      | 258.7   | (2M+Na)+    | 6.62                 |
| 928.3622 | 1      | 147.77  | (2M+Na)+    | 2.24                 |
| 929.3845 | 1      | 60.49   | (2M+Na)+    | -18.68               |

--- End Of Report ---

# Target Compound Screening Report

|                                 |                                        |                               |                                                     |
|---------------------------------|----------------------------------------|-------------------------------|-----------------------------------------------------|
| <b>Data File</b>                | 26.d                                   | <b>Sample Name</b>            | H2977667                                            |
| <b>Sample Type</b>              | Sample                                 | <b>Position</b>               | P1-C8                                               |
| <b>Instrument Name</b>          | Instrument 1                           | <b>User Name</b>              | Denis V.Bylina                                      |
| <b>Acq Method</b>               | Fast_Gradient_HRMS_pos_Lock_08272019.m | <b>Acquired Time</b>          | 9/23/2021 1:35:29 PM (UTC+03:00)                    |
| <b>IRM Calibration Status</b>   | Success                                | <b>DA Method</b>              | 1.m                                                 |
| <b>Comment</b>                  |                                        |                               |                                                     |
| <b>Sample Group</b>             |                                        | <b>Info.</b>                  | Agilent 6224 TOF LC/MS                              |
| <b>MFC</b>                      | C25H28N4O2                             | <b>Stream Name</b>            | LC 1                                                |
| <b>Acquisition Time (Local)</b> | 9/23/2021 1:35:29 PM (UTC+03:00)       | <b>Acquisition SW Version</b> | 6200 series TOF/6500 series Q-TOF B.08.00 (B8058.0) |
| <b>TOF Driver Version</b>       | 8.00.00                                | <b>TOF Firmware Version</b>   | 8.643                                               |
| <b>Tune Mass Range Max.</b>     | 1700                                   |                               |                                                     |

## Compound Table

| Label                       | Tgt Score | Mass Error (ppm) | Tgt Formula   | Obs. RT | Ref. Mass | Obs. Mass |
|-----------------------------|-----------|------------------|---------------|---------|-----------|-----------|
| Cpd 1: C25 H28 N4 O2; 3.302 | 96.35     | -0.64            | C25 H28 N4 O2 | 3.302   | 416.2212  | 416.221   |

| Obs. m/z | Obs. RT | Obs. Mass | Tgt Formula   | Tgt Mass | Tgt Mass Error (ppm) | RT Diff.        | Find Cpd Algorithm |
|----------|---------|-----------|---------------|----------|----------------------|-----------------|--------------------|
| 417.2282 | 3.302   | 416.221   | C25 H28 N4 O2 | 416.2212 | -0.64                | Find By Formula |                    |

## Compound Chromatograms

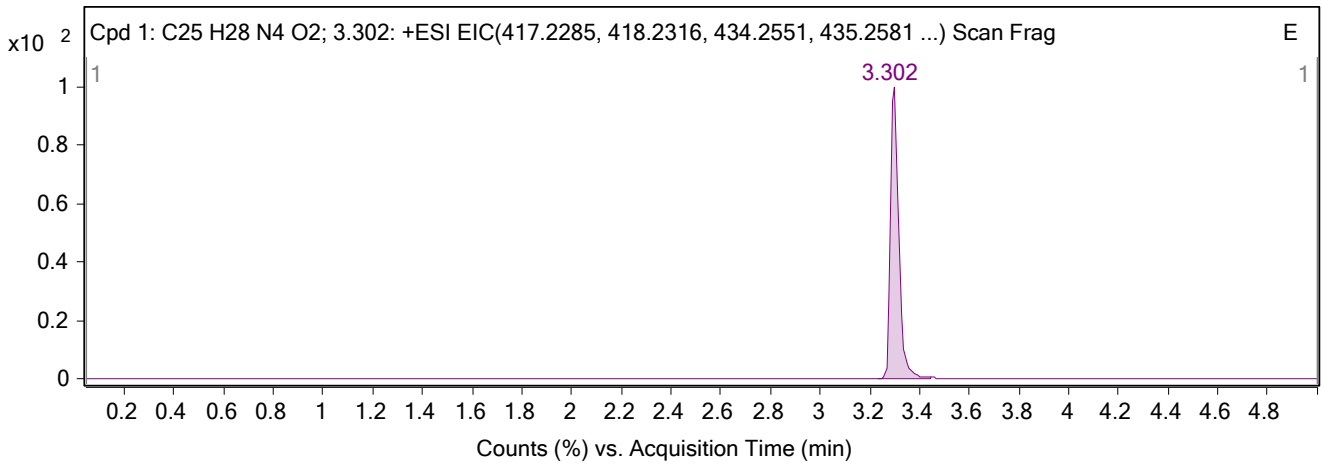

## MS Zoomed Spectrum

# Target Compound Screening Report

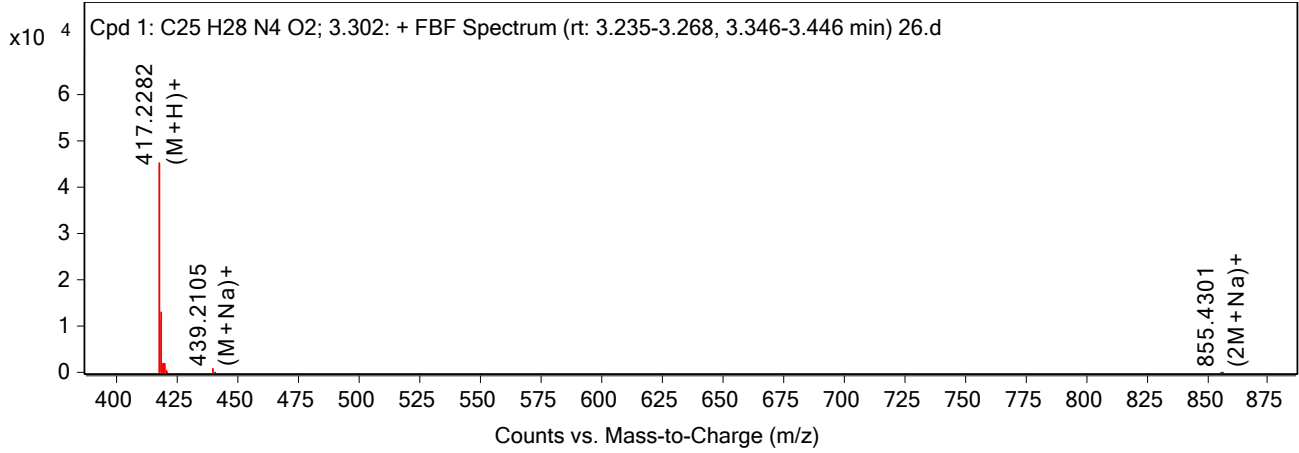

## MS Spectrum Peak List

| Obs. m/z | Charge | Abund    | Ion/Isotope |
|----------|--------|----------|-------------|
| 417.2282 | 1      | 45228.46 | (M+H)+      |
| 418.2312 | 1      | 10977.14 | (M+H)+      |
| 419.2349 | 1      | 1663.48  | (M+H)+      |
| 420.236  | 1      | 191.55   | (M+H)+      |
| 439.2105 | 1      | 627.68   | (M+Na)+     |
| 440.2163 | 1      | 176.59   | (M+Na)+     |
| 855.4301 | 1      | 163.33   | (2M+Na)+    |
| 856.4348 | 1      | 105.99   | (2M+Na)+    |

## MS Zoomed Spectrum

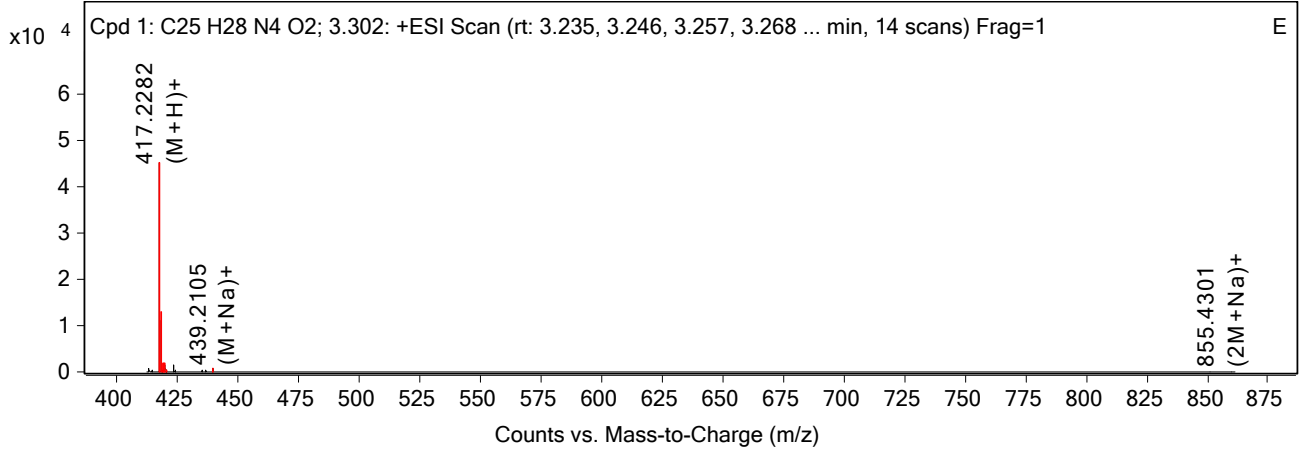

## MS Spectrum Peak List

| Obs. m/z | Charge | Abund    | Ion/Isotope | Tgt Mass Error (ppm) |
|----------|--------|----------|-------------|----------------------|
| 417.2282 | 1      | 45228.46 | (M+H)+      | 0.65                 |
| 418.2312 | 1      | 10977.14 | (M+H)+      | 0.92                 |
| 419.2349 | 1      | 1663.48  | (M+H)+      | -0.97                |
| 420.236  | 1      | 191.55   | (M+H)+      | 2.87                 |
| 439.2105 | 1      | 627.68   | (M+Na)+     | -0.18                |
| 440.2163 | 1      | 176.59   | (M+Na)+     | -6.31                |
| 855.4301 | 1      | 163.33   | (2M+Na)+    | 1.81                 |
| 856.4348 | 1      | 105.99   | (2M+Na)+    | -0.02                |

--- End Of Report ---



# Target Compound Screening Report

|                                 |                                        |                               |                                                     |
|---------------------------------|----------------------------------------|-------------------------------|-----------------------------------------------------|
| <b>Data File</b>                | 29.d                                   | <b>Sample Name</b>            | H2986300                                            |
| <b>Sample Type</b>              | Sample                                 | <b>Position</b>               | P1-D2                                               |
| <b>Instrument Name</b>          | Instrument 1                           | <b>User Name</b>              | Denis V.Bylina                                      |
| <b>Acq Method</b>               | Fast_Gradient_HRMS_pos_Lock_08272019.m | <b>Acquired Time</b>          | 9/24/2021 1:12:35 PM (UTC+03:00)                    |
| <b>IRM Calibration Status</b>   | Success                                | <b>DA Method</b>              | 1.m                                                 |
| <b>Comment</b>                  |                                        |                               |                                                     |
| <b>Sample Group</b>             |                                        | <b>Info.</b>                  | Agilent 6224 TOF LC/MS                              |
| <b>MFC</b>                      | C23H40N2O2                             | <b>Stream Name</b>            | LC 1                                                |
| <b>Acquisition Time (Local)</b> | 9/24/2021 1:12:35 PM (UTC+03:00)       | <b>Acquisition SW Version</b> | 6200 series TOF/6500 series Q-TOF B.08.00 (B8058.0) |
| <b>TOF Driver Version</b>       | 8.00.00                                | <b>TOF Firmware Version</b>   | 8.643                                               |
| <b>Tune Mass Range Max.</b>     | 1700                                   |                               |                                                     |

## Compound Table

| Label                       | Tgt Score | Mass Error (ppm) | Tgt Formula   | Obs. RT | Ref. Mass | Obs. Mass |
|-----------------------------|-----------|------------------|---------------|---------|-----------|-----------|
| Cpd 1: C23 H40 N2 O2; 3.421 | 97.46     | -2.03            | C23 H40 N2 O2 | 3.421   | 376.309   | 376.3082  |

| Obs. m/z | Obs. RT | Obs. Mass | Tgt Formula   | Tgt Mass | Tgt Mass Error (ppm) | RT Diff.        | Find Cpd Algorithm |
|----------|---------|-----------|---------------|----------|----------------------|-----------------|--------------------|
| 775.6065 | 3.421   | 376.3082  | C23 H40 N2 O2 | 376.309  | -2.03                | Find By Formula |                    |

## Compound Chromatograms

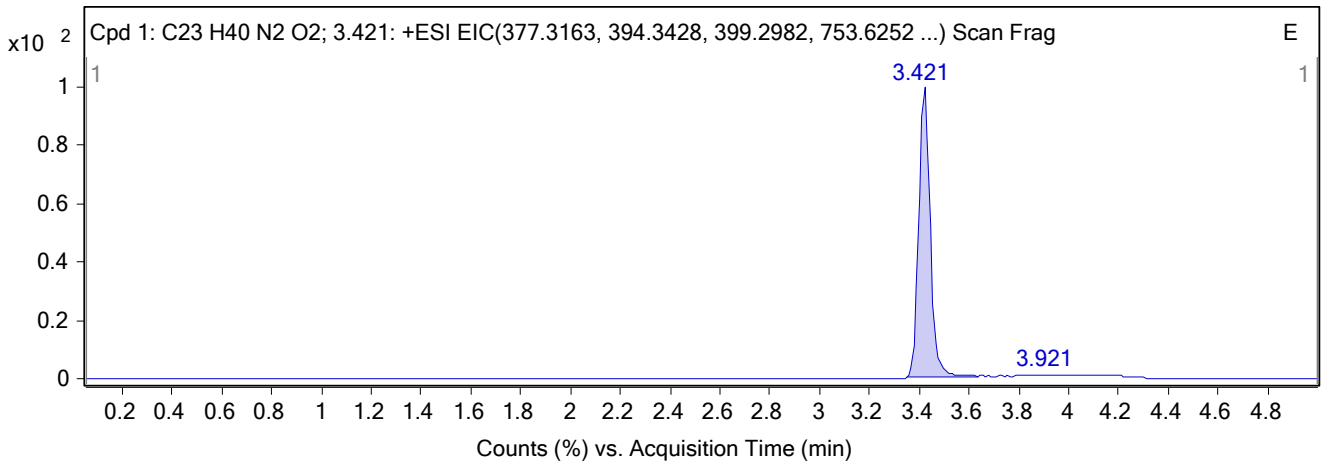

MS Zoomed Spectrum

# Target Compound Screening Report

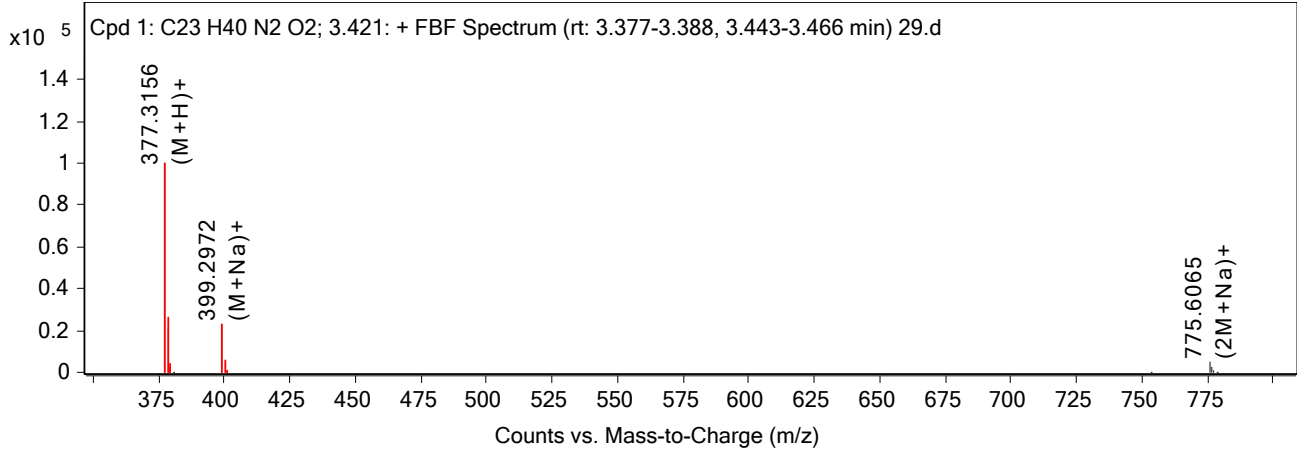

## MS Spectrum Peak List

| Obs. m/z | Charge | Abund    | Ion/Isotope |
|----------|--------|----------|-------------|
| 377.3156 | 1      | 99809.05 | (M+H)+      |
| 378.3186 | 1      | 21266.61 | (M+H)+      |
| 379.3217 | 1      | 2699.36  | (M+H)+      |
| 380.3181 | 1      | 354.17   | (M+H)+      |
| 399.2972 | 1      | 22646.62 | (M+Na)+     |
| 400.301  | 1      | 5160.78  | (M+Na)+     |
| 401.3018 | 1      | 799.57   | (M+Na)+     |
| 775.6065 | 1      | 4701.25  | (2M+Na)+    |
| 776.6088 | 1      | 2407.88  | (2M+Na)+    |
| 777.611  | 1      | 537.13   | (2M+Na)+    |

## MS Zoomed Spectrum

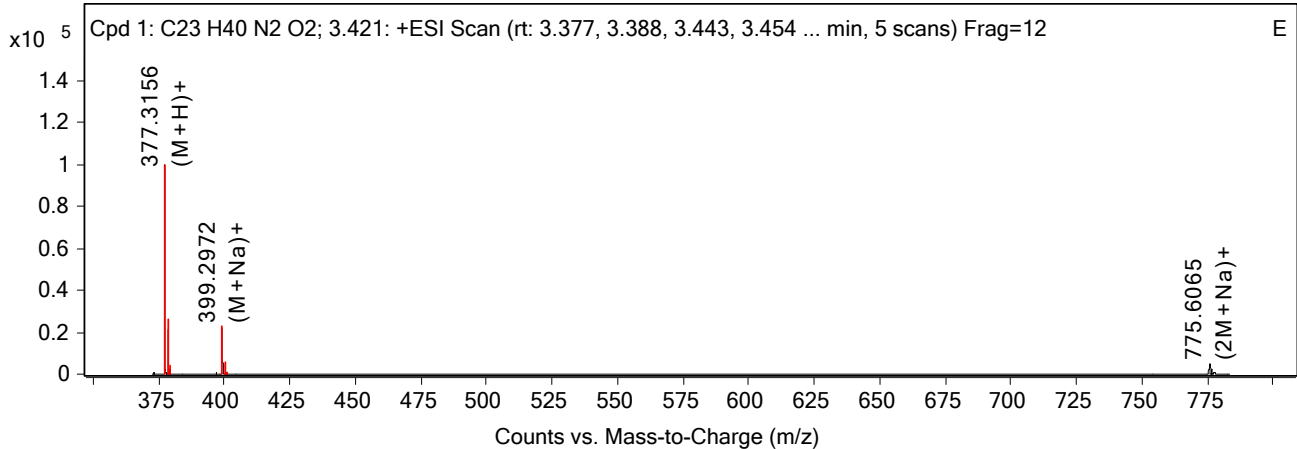

## MS Spectrum Peak List

| Obs. m/z | Charge | Abund    | Ion/Isotope | Tgt Mass Error (ppm) |
|----------|--------|----------|-------------|----------------------|
| 377.3156 | 1      | 99809.05 | (M+H)+      | 1.72                 |
| 378.3186 | 1      | 21266.61 | (M+H)+      | 2.31                 |
| 379.3217 | 1      | 2699.36  | (M+H)+      | 1.92                 |
| 380.3181 | 1      | 354.17   | (M+H)+      | 18.81                |
| 399.2972 | 1      | 22646.62 | (M+Na)+     | 2.38                 |
| 400.301  | 1      | 5160.78  | (M+Na)+     | 0.99                 |
| 401.3018 | 1      | 799.57   | (M+Na)+     | 6.47                 |
| 775.6065 | 1      | 4701.25  | (2M+Na)+    | 0.9                  |
| 776.6088 | 1      | 2407.88  | (2M+Na)+    | 2.12                 |
| 777.611  | 1      | 537.13   | (2M+Na)+    | 3.21                 |

--- End Of Report ---

# Target Compound Screening Report

|                                 |                                        |                               |                                                     |
|---------------------------------|----------------------------------------|-------------------------------|-----------------------------------------------------|
| <b>Data File</b>                | 25.d                                   | <b>Sample Name</b>            | H2990769                                            |
| <b>Sample Type</b>              | Sample                                 | <b>Position</b>               | P1-C7                                               |
| <b>Instrument Name</b>          | Instrument 1                           | <b>User Name</b>              | Denis V.Bylina                                      |
| <b>Acq Method</b>               | Fast_Gradient_HRMS_pos_Lock_08272019.m | <b>Acquired Time</b>          | 9/24/2021 12:50:32 PM (UTC+03:00)                   |
| <b>IRM Calibration Status</b>   | Success                                | <b>DA Method</b>              | 1.m                                                 |
| <b>Comment</b>                  |                                        |                               |                                                     |
| <b>Sample Group</b>             |                                        | <b>Info.</b>                  | Agilent 6224 TOF LC/MS                              |
| <b>MFC</b>                      | C21H38N2O2                             | <b>Stream Name</b>            | LC 1                                                |
| <b>Acquisition Time (Local)</b> | 9/24/2021 12:50:32 PM (UTC+03:00)      | <b>Acquisition SW Version</b> | 6200 series TOF/6500 series Q-TOF B.08.00 (B8058.0) |
| <b>TOF Driver Version</b>       | 8.00.00                                | <b>TOF Firmware Version</b>   | 8.643                                               |
| <b>Tune Mass Range Max.</b>     | 1700                                   |                               |                                                     |

## Compound Table

| Label                       | Tgt Score | Mass Error (ppm) | Tgt Formula   | Obs. RT | Ref. Mass | Obs. Mass |
|-----------------------------|-----------|------------------|---------------|---------|-----------|-----------|
| Cpd 1: C21 H38 N2 O2; 3.315 | 98.41     | -1.19            | C21 H38 N2 O2 | 3.315   | 350.2933  | 350.2929  |

| Obs. m/z | Obs. RT | Obs. Mass | Tgt Formula   | Tgt Mass | Tgt Mass Error (ppm) | RT Diff.        | Find Cpds Algorithm |
|----------|---------|-----------|---------------|----------|----------------------|-----------------|---------------------|
| 723.5755 | 3.315   | 350.2929  | C21 H38 N2 O2 | 350.2933 | -1.19                | Find By Formula |                     |

## Compound Chromatograms

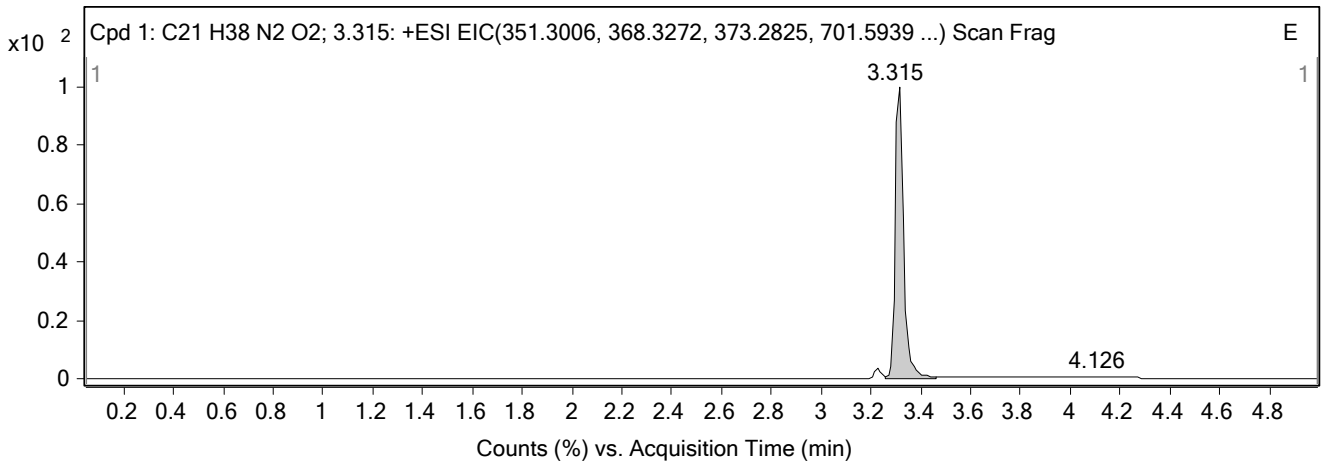

MS Zoomed Spectrum

# Target Compound Screening Report

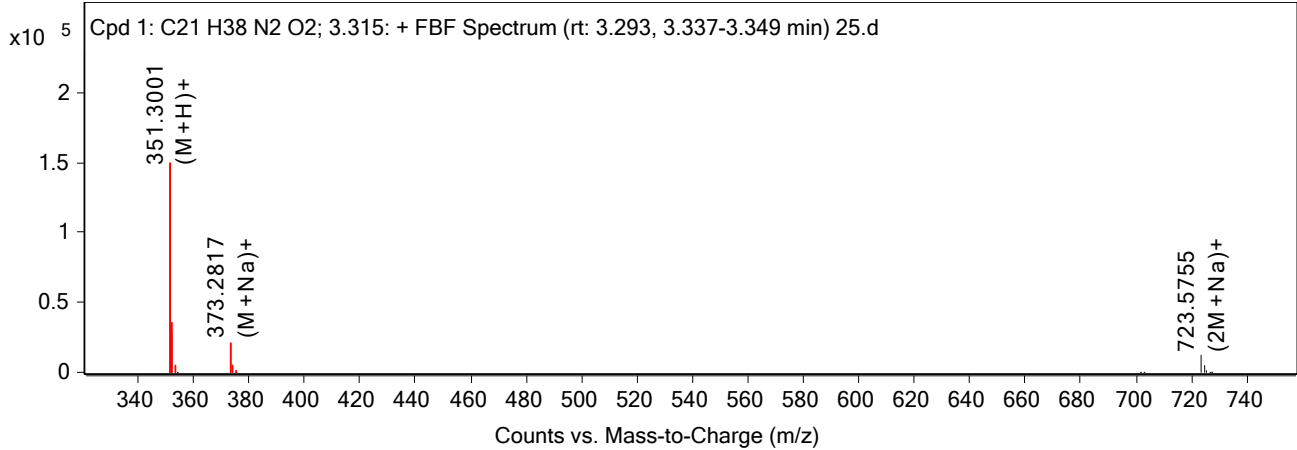

## MS Spectrum Peak List

| Obs. m/z | Charge | Abund     | Ion/Isotope |
|----------|--------|-----------|-------------|
| 351.3001 | 1      | 149143.94 | (M+H)+      |
| 352.3041 | 1      | 27999.71  | (M+H)+      |
| 353.3077 | 1      | 3514.03   | (M+H)+      |
| 354.3111 | 1      | 400.44    | (M+H)+      |
| 373.2817 | 1      | 21229.28  | (M+Na)+     |
| 374.2854 | 1      | 4681.22   | (M+Na)+     |
| 375.2865 | 1      | 673.8     | (M+Na)+     |
| 723.5755 | 1      | 11723.36  | (2M+Na)+    |
| 724.5777 | 1      | 5218.04   | (2M+Na)+    |
| 725.5812 | 1      | 1314.22   | (2M+Na)+    |

## MS Zoomed Spectrum

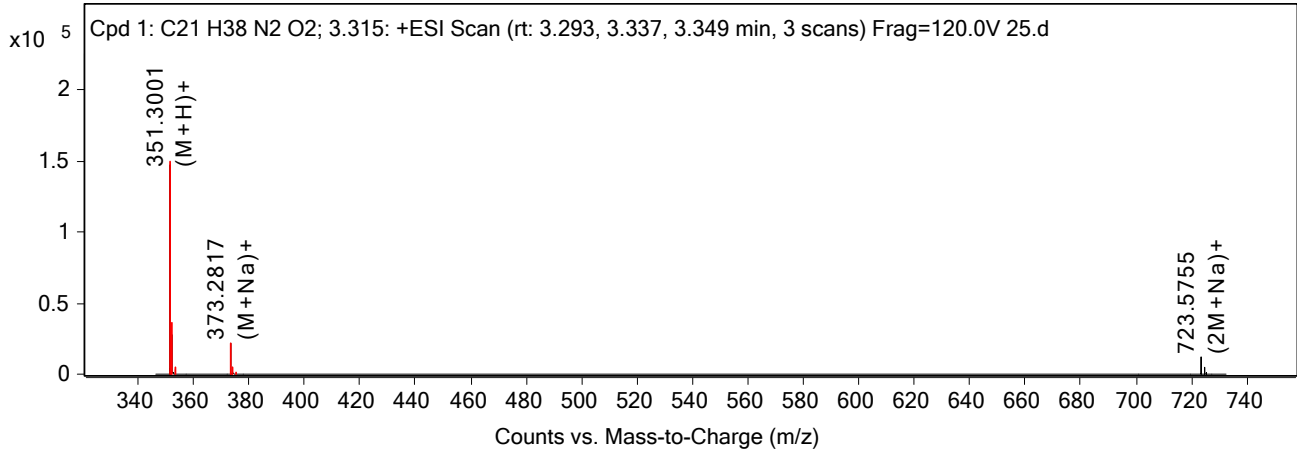

## MS Spectrum Peak List

| Obs. m/z | Charge | Abund     | Ion/Isotope | Tgt Mass Error (ppm) |
|----------|--------|-----------|-------------|----------------------|
| 351.3001 | 1      | 149143.94 | (M+H)+      | 1.36                 |
| 352.3041 | 1      | 27999.71  | (M+H)+      | -0.84                |
| 353.3077 | 1      | 3514.03   | (M+H)+      | -2.75                |
| 354.3111 | 1      | 400.44    | (M+H)+      | -4.32                |
| 373.2817 | 1      | 21229.28  | (M+Na)+     | 2.15                 |
| 374.2854 | 1      | 4681.22   | (M+Na)+     | 1                    |
| 375.2865 | 1      | 673.8     | (M+Na)+     | 5.73                 |
| 723.5755 | 1      | 11723.36  | (2M+Na)+    | 0.5                  |
| 724.5777 | 1      | 5218.04   | (2M+Na)+    | 1.98                 |
| 725.5812 | 1      | 1314.22   | (2M+Na)+    | 1.27                 |

--- End Of Report ---

# Target Compound Screening Report

|                                 |                                        |                               |                                                     |
|---------------------------------|----------------------------------------|-------------------------------|-----------------------------------------------------|
| <b>Data File</b>                | 23.d                                   | <b>Sample Name</b>            | H2990770                                            |
| <b>Sample Type</b>              | Sample                                 | <b>Position</b>               | P1-C5                                               |
| <b>Instrument Name</b>          | Instrument 1                           | <b>User Name</b>              | Denis V.Bylina                                      |
| <b>Acq Method</b>               | Fast_Gradient_HRMS_pos_Lock_08272019.m | <b>Acquired Time</b>          | 9/23/2021 8:55:47 PM (UTC+03:00)                    |
| <b>IRM Calibration Status</b>   | Success                                | <b>DA Method</b>              | 1.m                                                 |
| <b>Comment</b>                  |                                        |                               |                                                     |
| <b>Sample Group</b>             |                                        | <b>Info.</b>                  | Agilent 6224 TOF LC/MS                              |
| <b>MFC</b>                      | C22H38N2O2                             | <b>Stream Name</b>            | LC 1                                                |
| <b>Acquisition Time (Local)</b> | 9/23/2021 8:55:47 PM (UTC+03:00)       | <b>Acquisition SW Version</b> | 6200 series TOF/6500 series Q-TOF B.08.00 (B8058.0) |
| <b>TOF Driver Version</b>       | 8.00.00                                | <b>TOF Firmware Version</b>   | 8.643                                               |
| <b>Tune Mass Range Max.</b>     | 1700                                   |                               |                                                     |

## Compound Table

| Label                       | Tgt Score | Mass Error (ppm) | Tgt Formula   | Obs. RT | Ref. Mass | Obs. Mass |
|-----------------------------|-----------|------------------|---------------|---------|-----------|-----------|
| Cpd 1: C22 H38 N2 O2; 3.265 | 99.72     | -0.15            | C22 H38 N2 O2 | 3.265   | 362.2933  | 362.2933  |

| Obs. m/z | Obs. RT | Obs. Mass | Tgt Formula   | Tgt Mass | Tgt Mass Error (ppm) | RT Diff.        | Find Cps Algorithm |
|----------|---------|-----------|---------------|----------|----------------------|-----------------|--------------------|
| 385.2825 | 3.265   | 362.2933  | C22 H38 N2 O2 | 362.2933 | -0.15                | Find By Formula |                    |

## Compound Chromatograms

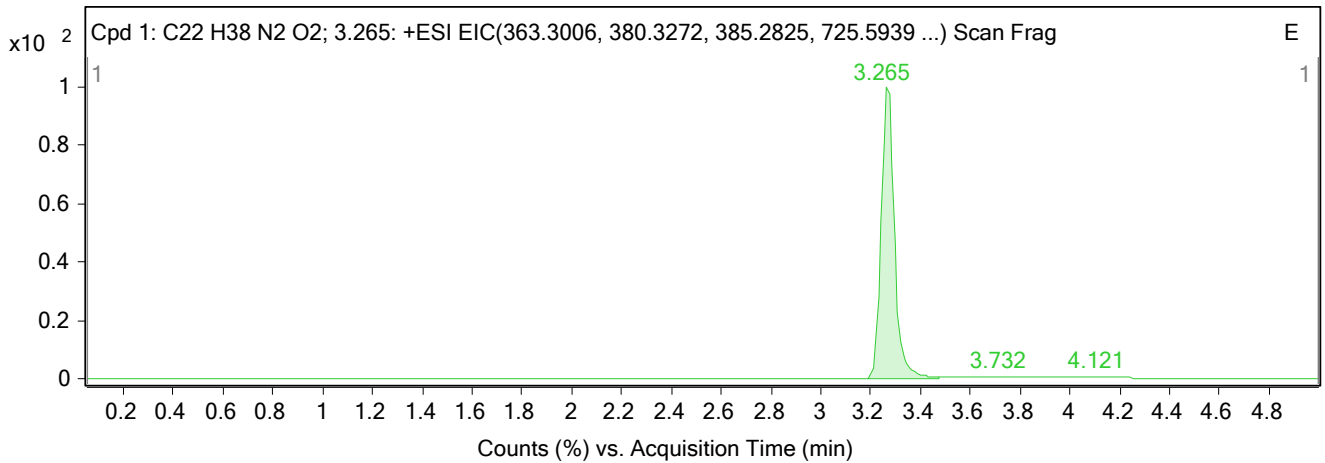

MS Zoomed Spectrum

# Target Compound Screening Report

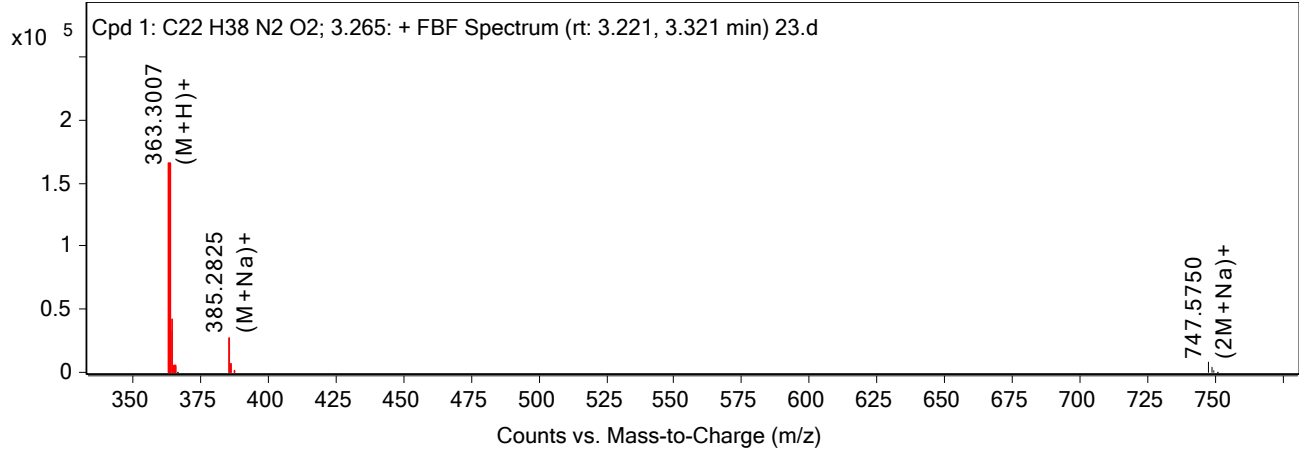

### MS Spectrum Peak List

| Obs. m/z | Charge | Abund     | Ion/Isotope |
|----------|--------|-----------|-------------|
| 363.3007 | 1      | 165753.05 | (M+H)+      |
| 364.3035 | 1      | 32806.52  | (M+H)+      |
| 365.3071 | 1      | 3868.58   | (M+H)+      |
| 366.3047 | 1      | 416.89    | (M+H)+      |
| 385.2825 | 1      | 27447.09  | (M+Na)+     |
| 386.2858 | 1      | 6593.94   | (M+Na)+     |
| 387.2892 | 1      | 1026.03   | (M+Na)+     |
| 747.575  | 1      | 7863.71   | (2M+Na)+    |
| 748.5766 | 1      | 3904.6    | (2M+Na)+    |
| 749.5785 | 1      | 1055.03   | (2M+Na)+    |

### MS Zoomed Spectrum

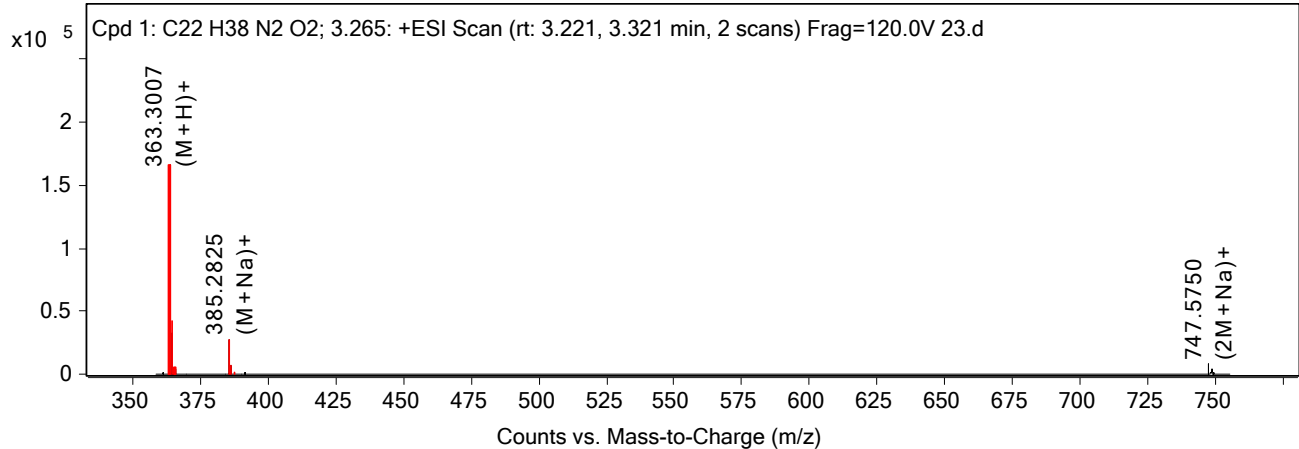

### MS Spectrum Peak List

| Obs. m/z | Charge | Abund     | Ion/Isotope | Tgt Mass Error (ppm) |
|----------|--------|-----------|-------------|----------------------|
| 363.3007 | 1      | 165753.05 | (M+H)+      | -0.35                |
| 364.3035 | 1      | 32806.52  | (M+H)+      | 1.04                 |
| 365.3071 | 1      | 3868.58   | (M+H)+      | -0.88                |
| 366.3047 | 1      | 416.89    | (M+H)+      | 13.29                |
| 385.2825 | 1      | 27447.09  | (M+Na)+     | 0                    |
| 386.2858 | 1      | 6593.94   | (M+Na)+     | -0.03                |
| 387.2892 | 1      | 1026.03   | (M+Na)+     | -1.16                |
| 747.575  | 1      | 7863.71   | (2M+Na)+    | 1.14                 |
| 748.5766 | 1      | 3904.6    | (2M+Na)+    | 3.28                 |
| 749.5785 | 1      | 1055.03   | (2M+Na)+    | 4.95                 |

--- End Of Report ---
