# Supplementary material
Source: PubMed Central journal article supplement (PMC9763054)
Supplement: NIHMS1852089-supplement-SI_3.pdf [file NIHMS1852089-supplement-SI_3.pdf]

<sup>1</sup>H NMR spectrum of PV-000002653403

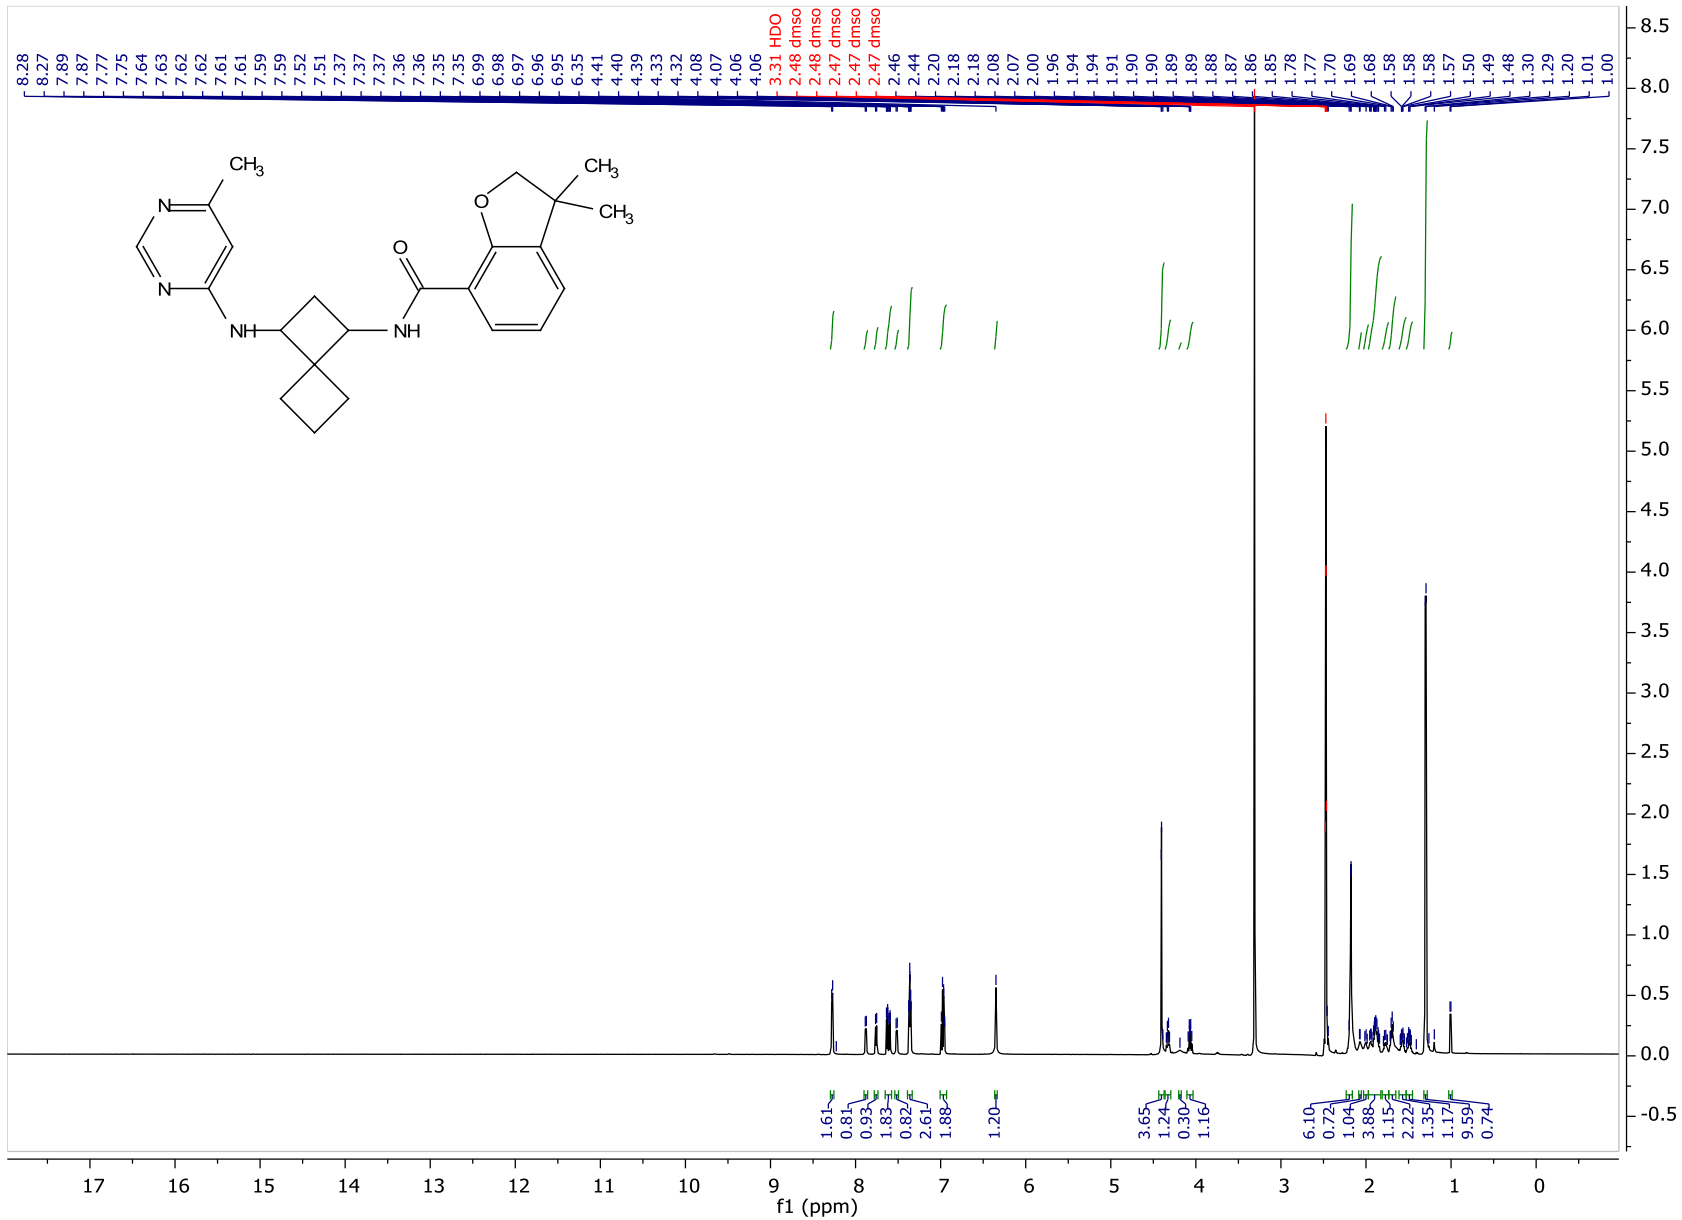

<sup>13</sup>C NMR spectrum of PV-000002653403

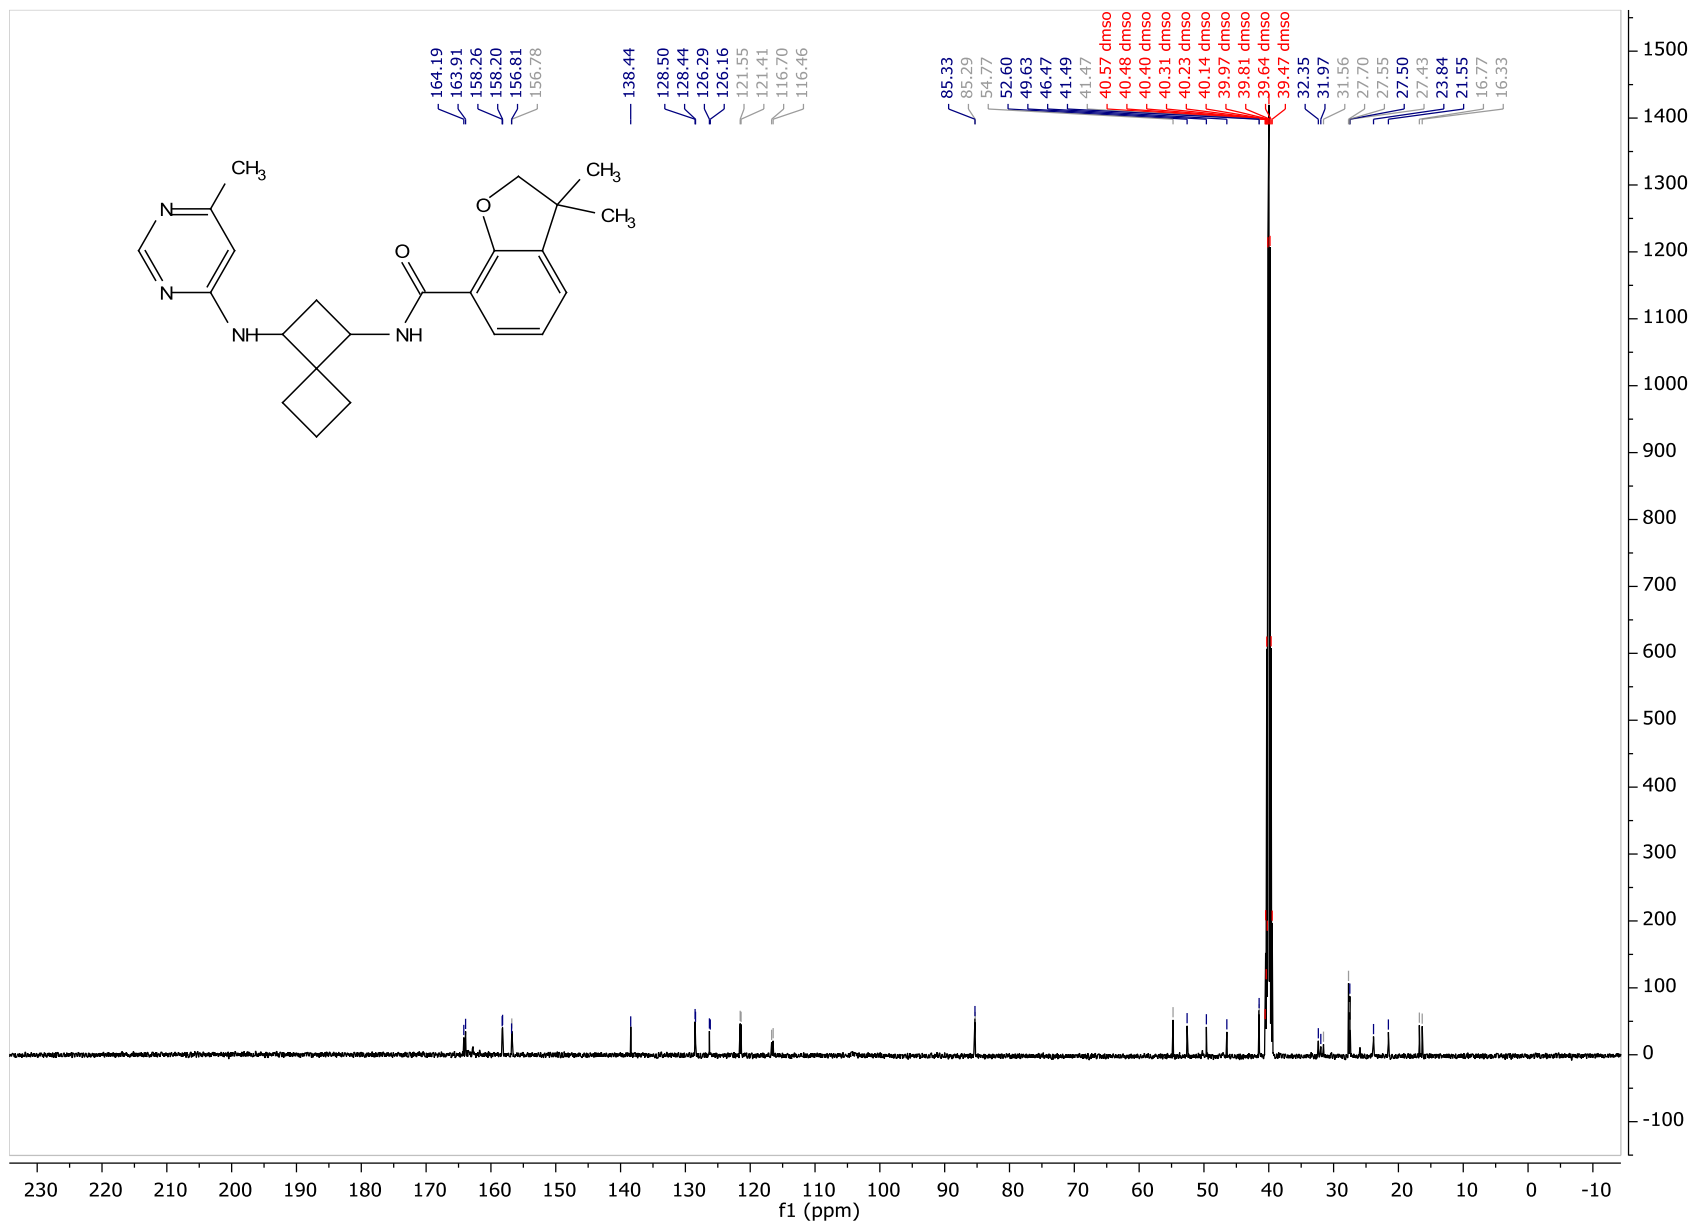



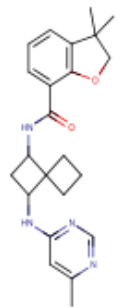

Mol Wt 392.49  
 Exact Mass 392.26

| # | Time  | Area% |
|---|-------|-------|
| 1 | 1.184 | 49.36 |
| 2 | 1.208 | 50.64 |

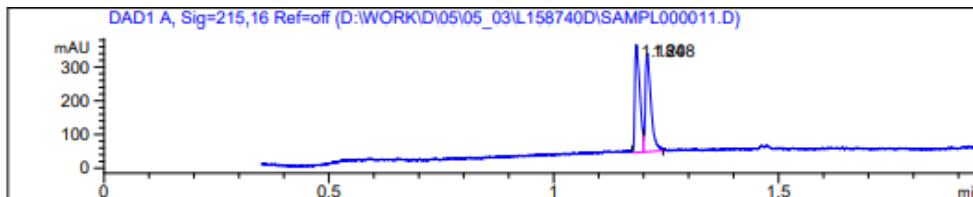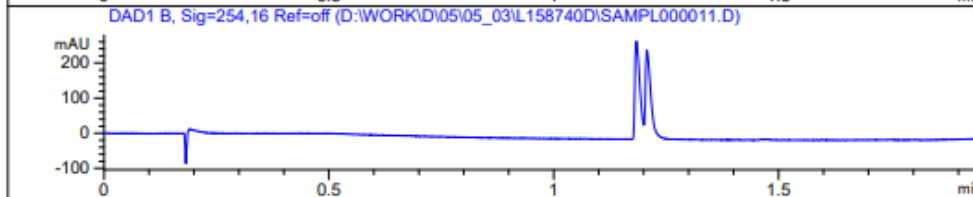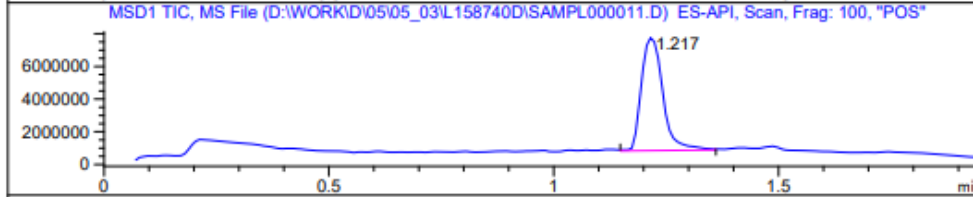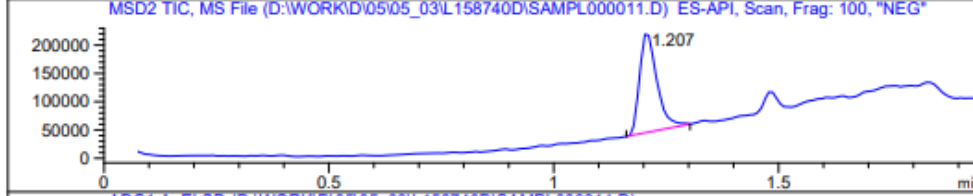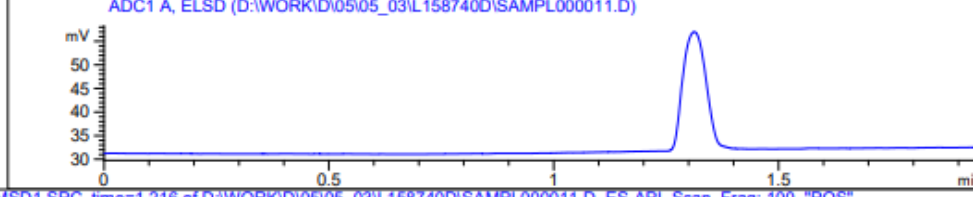

RT 1.217

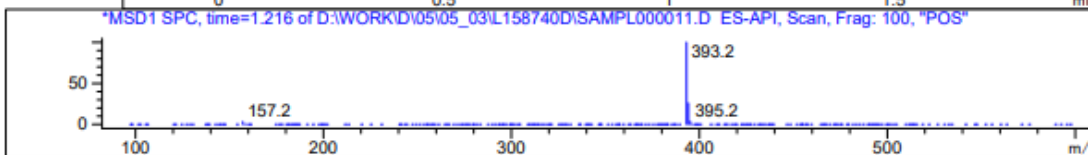

RT 1.207

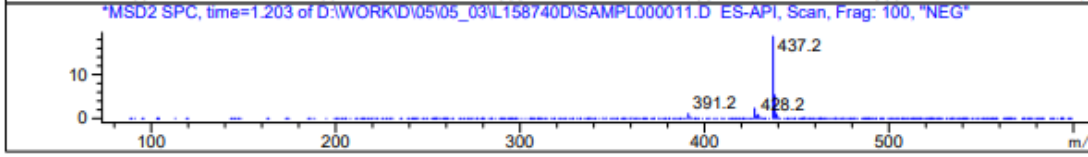

<sup>1</sup>H NMR spectrum of PV-000027612529

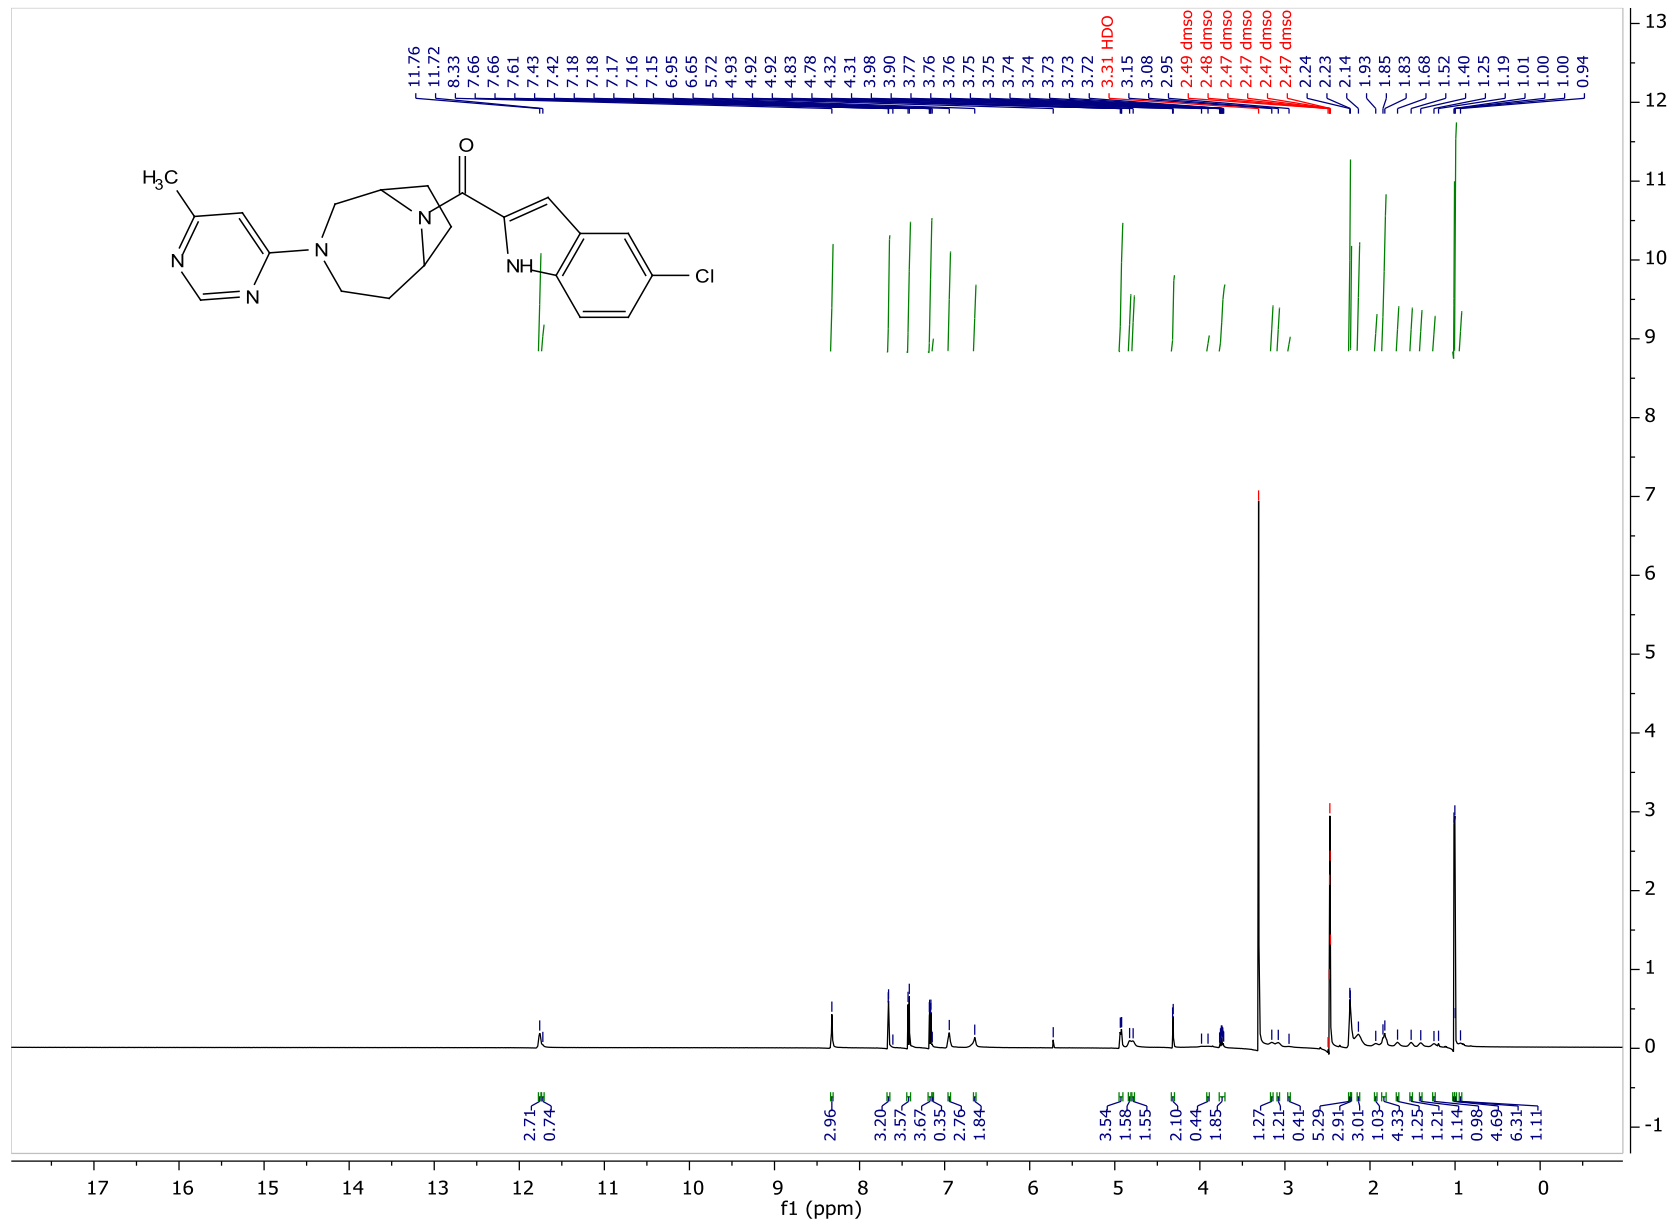

<sup>13</sup>C NMR spectrum of PV-000027612529

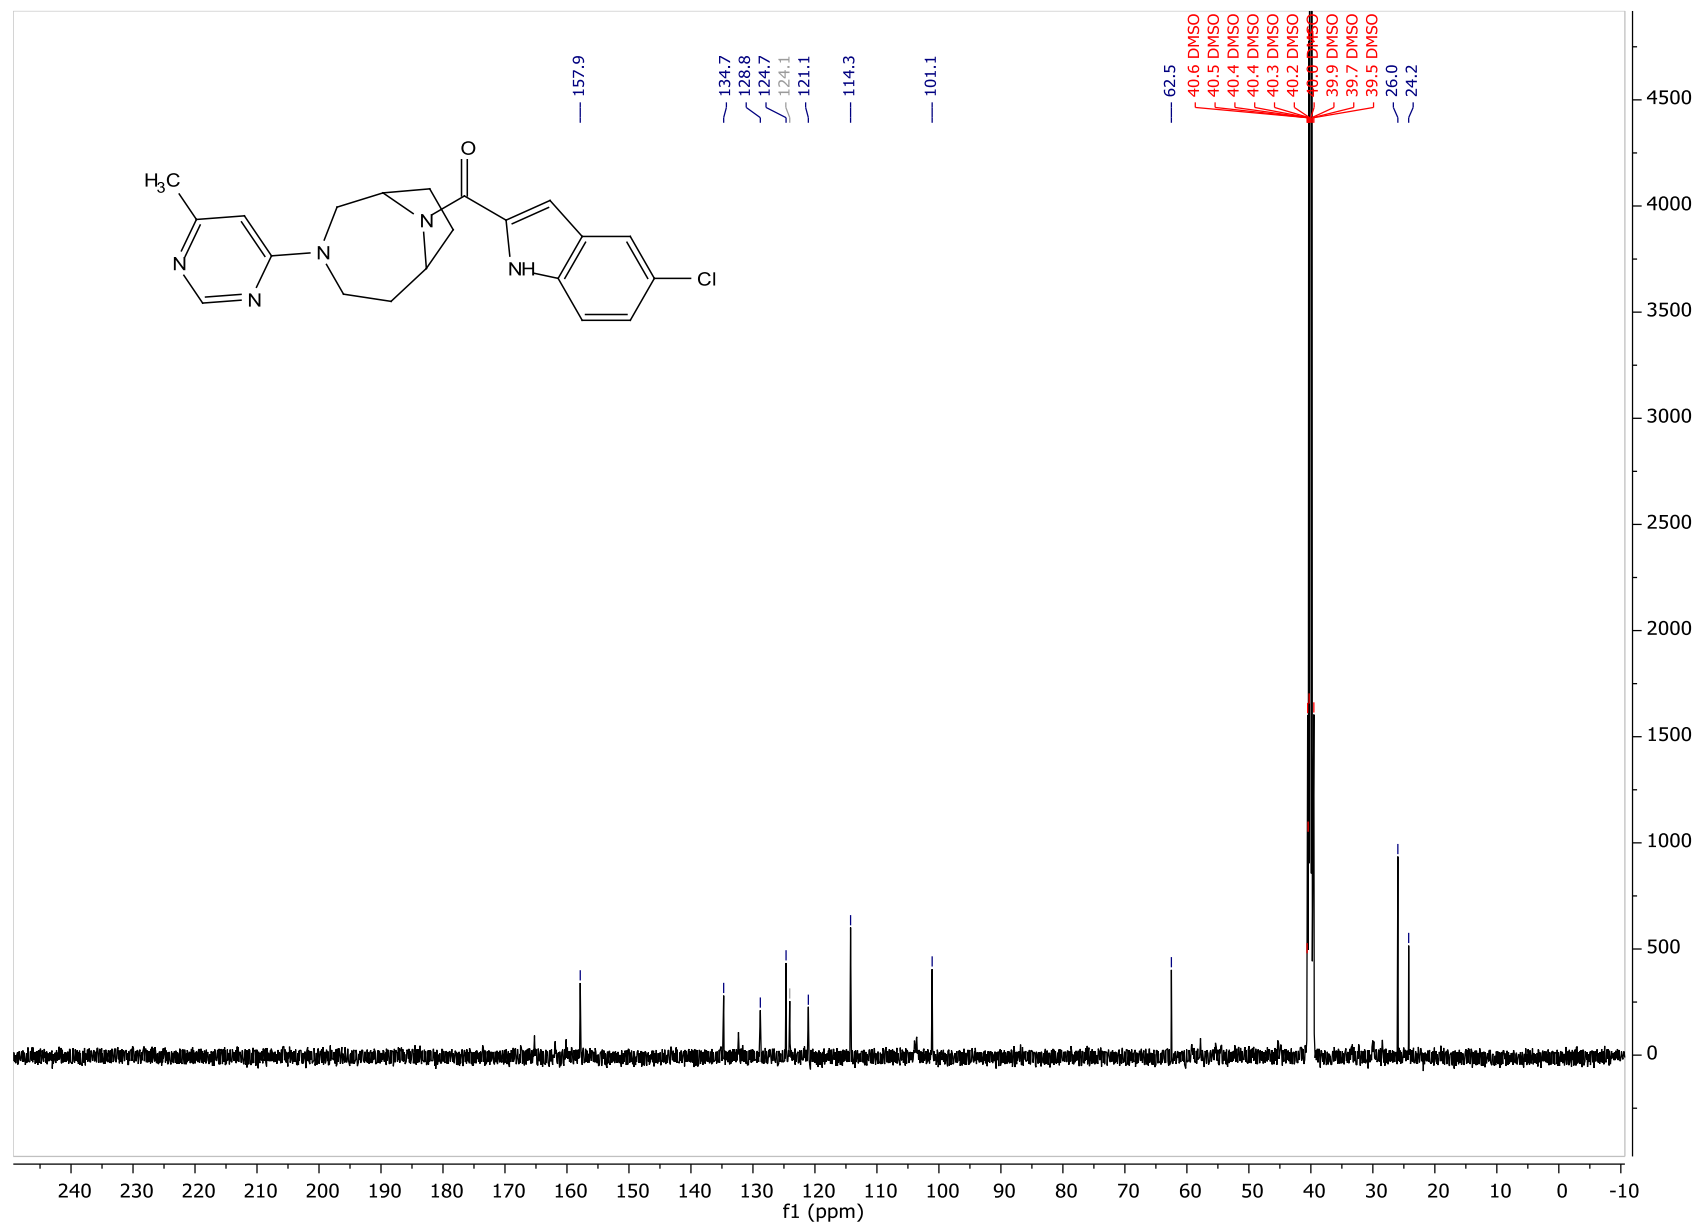

Ret\_Time: 1.343 min

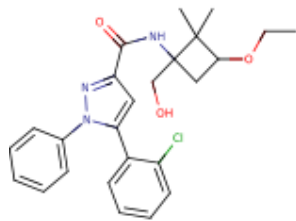

**Mol Wt** 453.96  
**Exact Mass** 453.22

| # | Time  | Area%  |
|---|-------|--------|
| 1 | 1.343 | 100.00 |

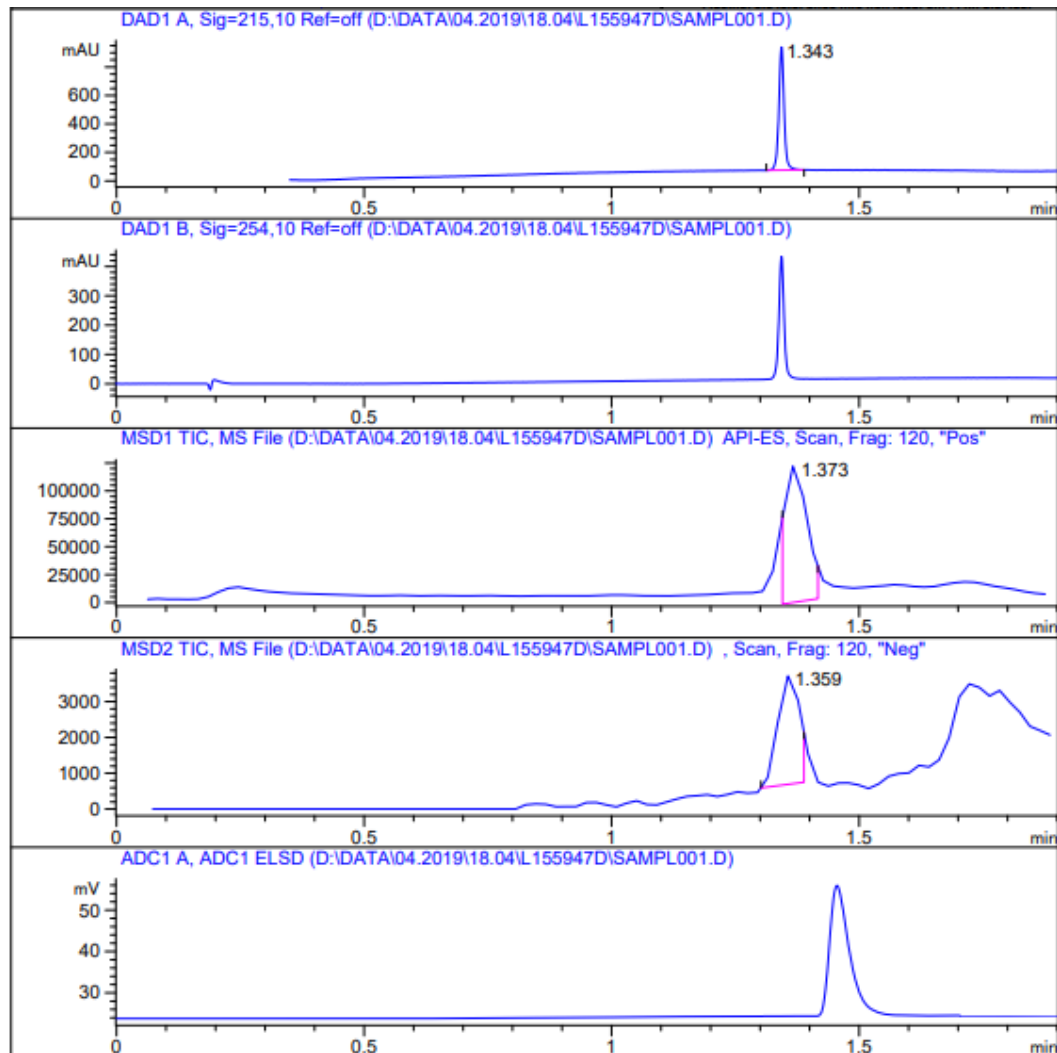

RT 1.373

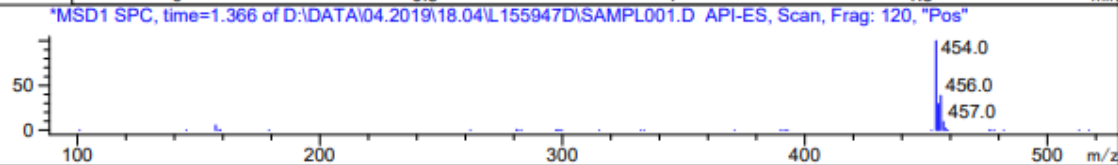

RT 1.359

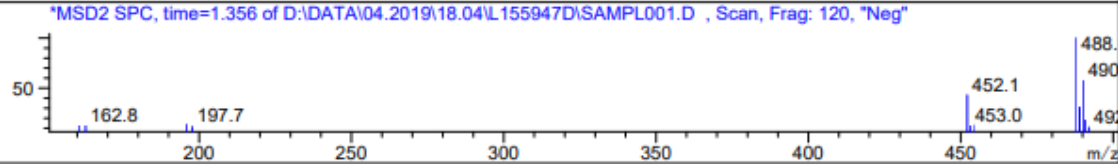

<sup>1</sup>H NMR spectrum of PV-001843530178

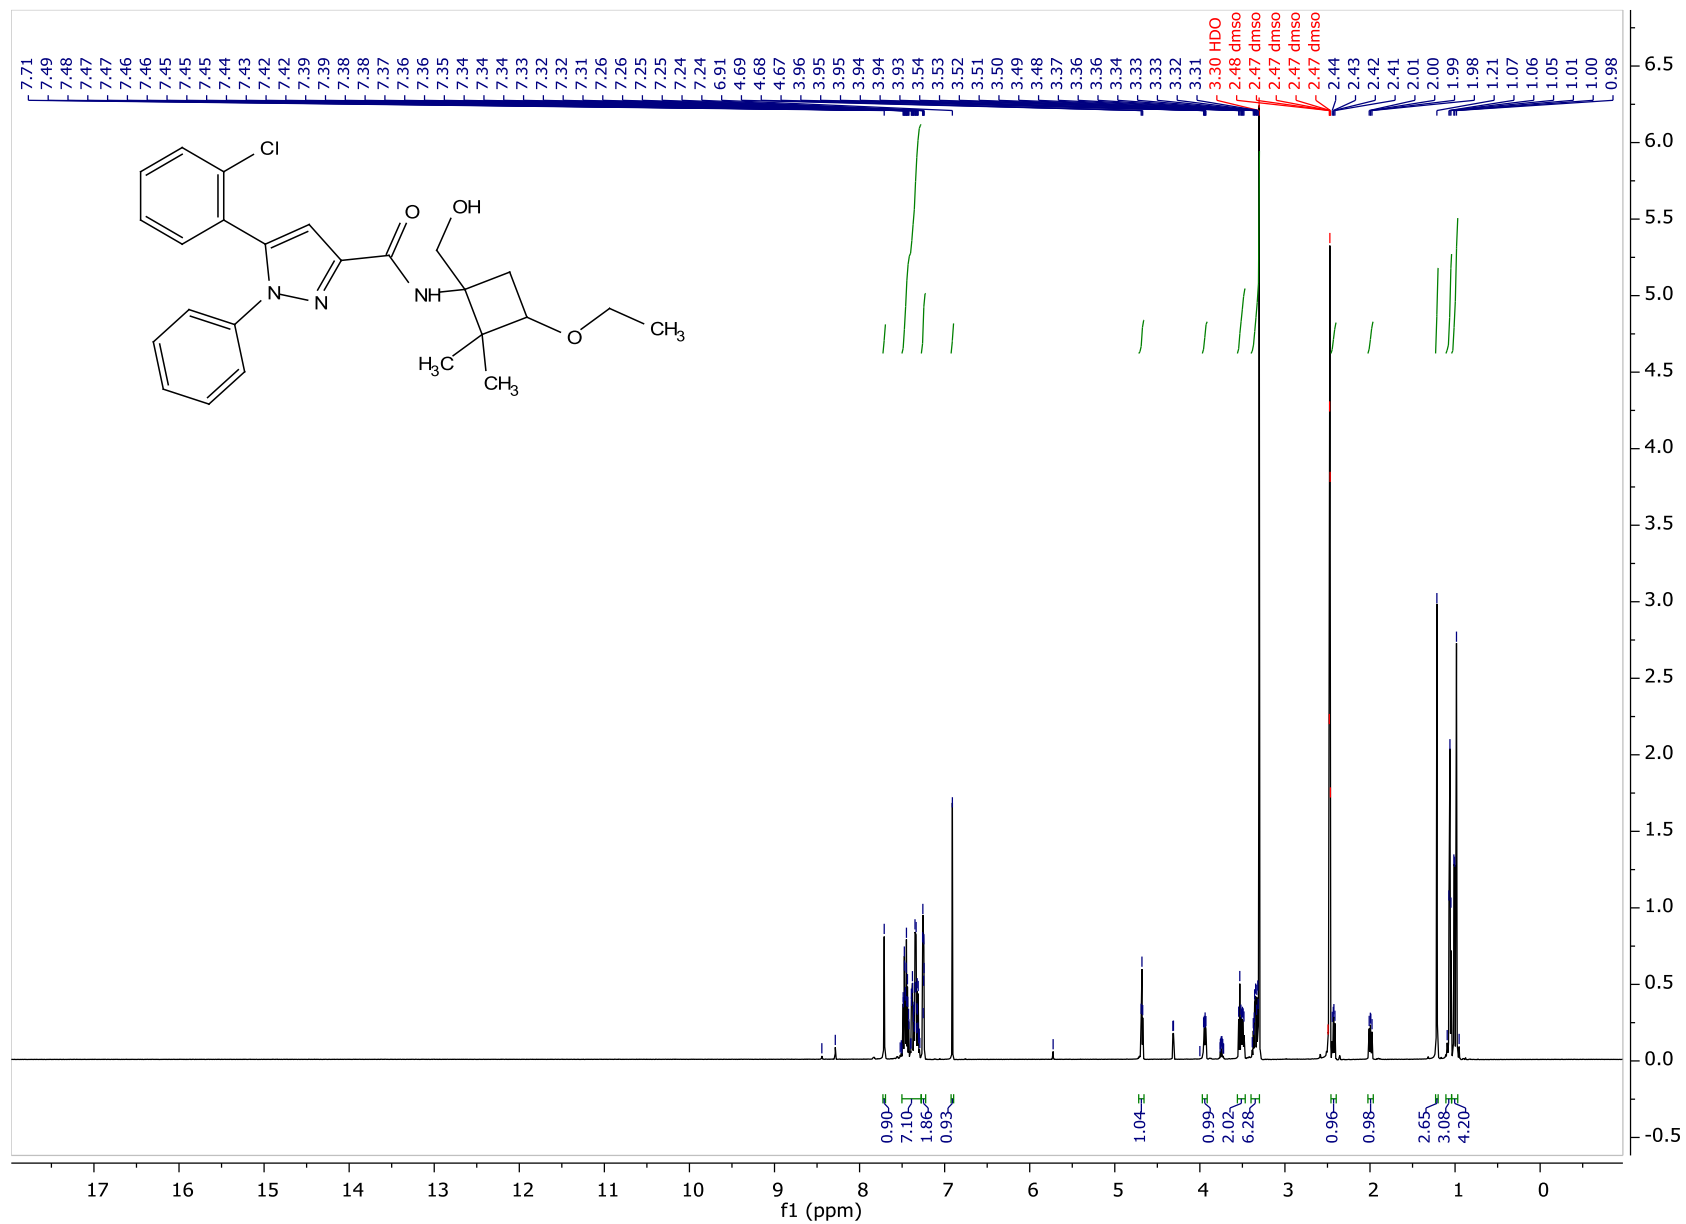

<sup>13</sup>C NMR spectrum of PV-001843530178

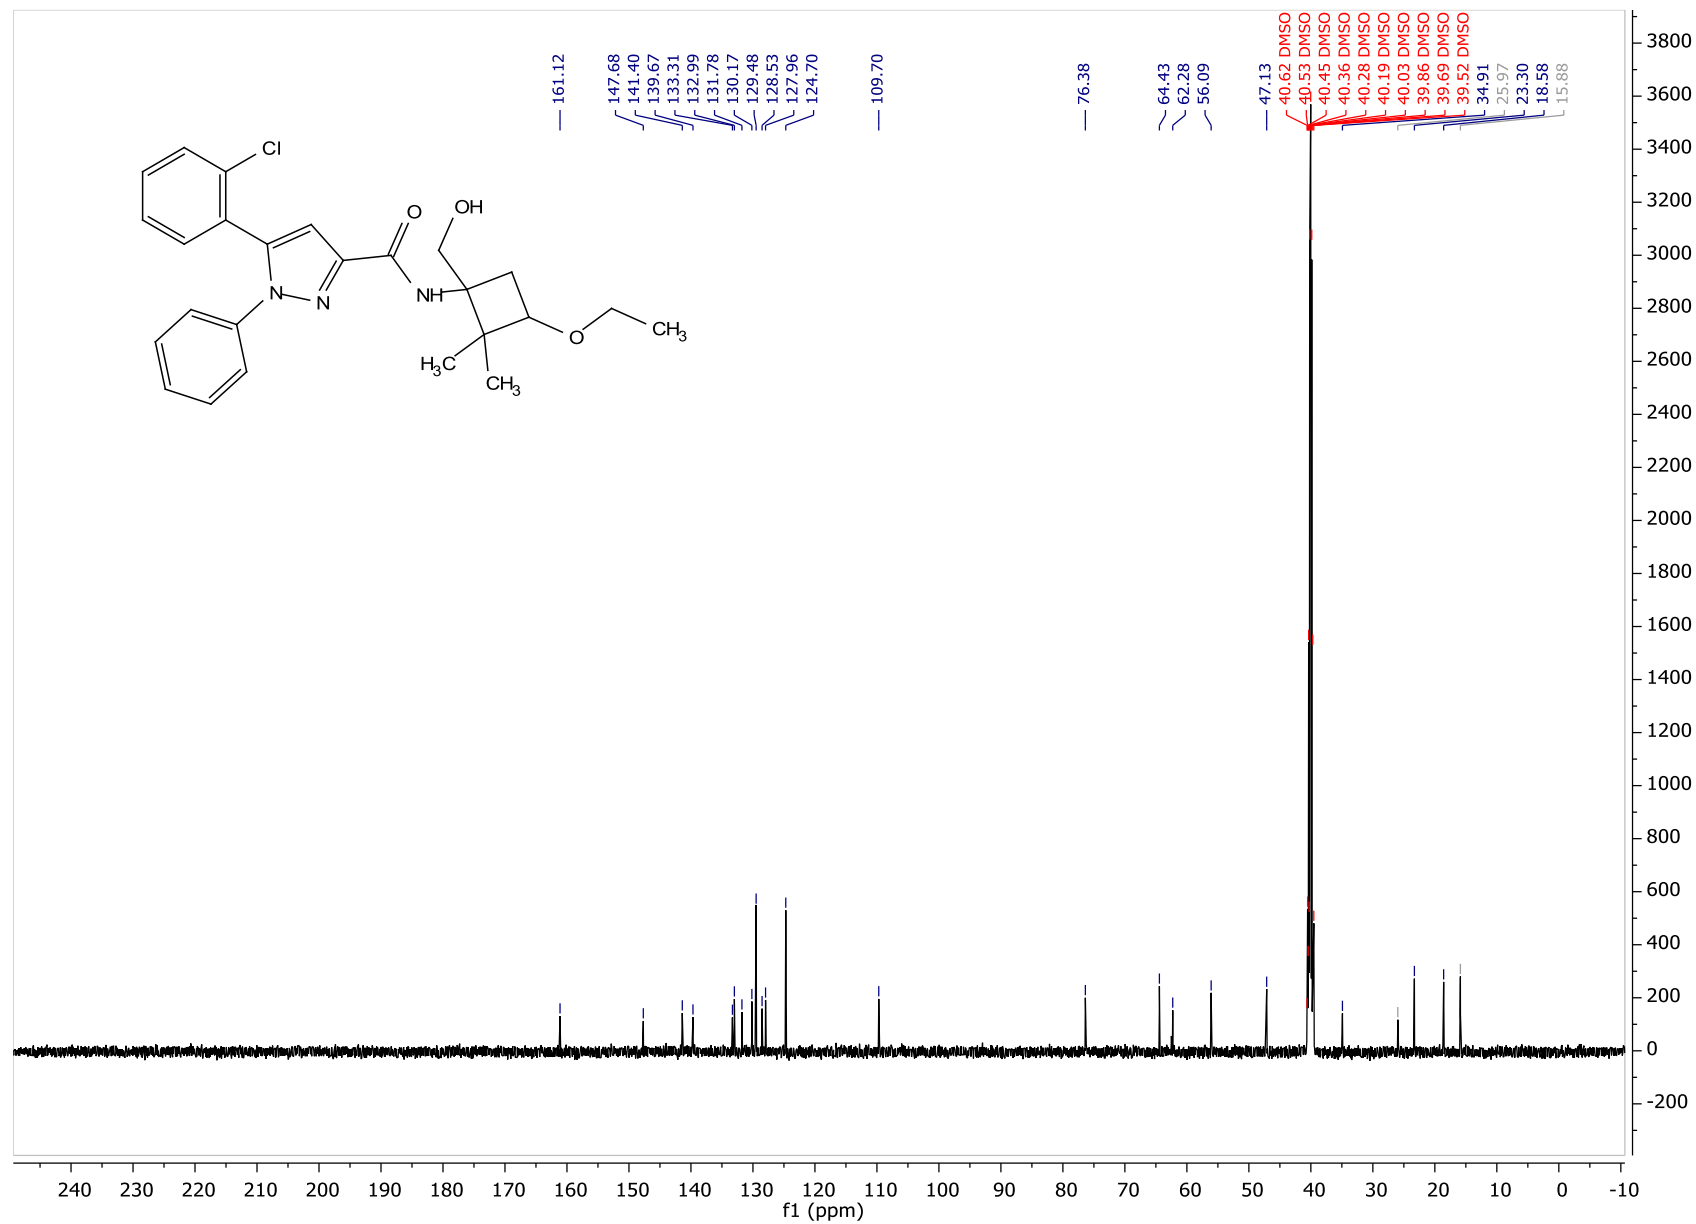

Ret\_Time: 1.343 min

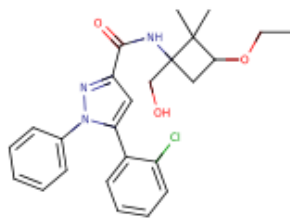

**Mol Wt** 453.96  
**Exact Mass** 453.22

| # | Time  | Area%  |
|---|-------|--------|
| 1 | 1.343 | 100.00 |

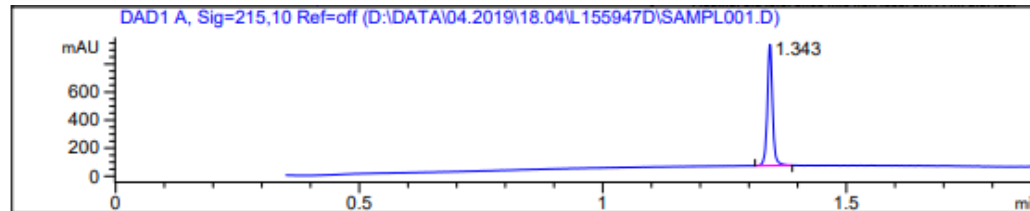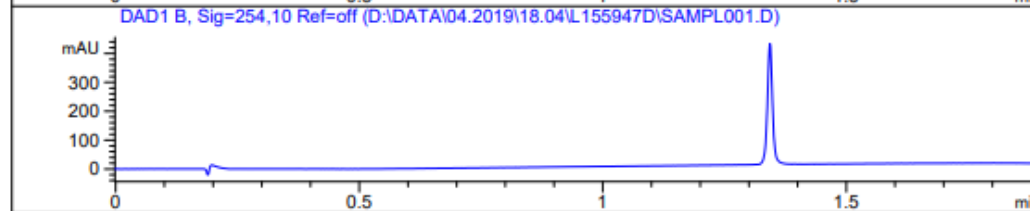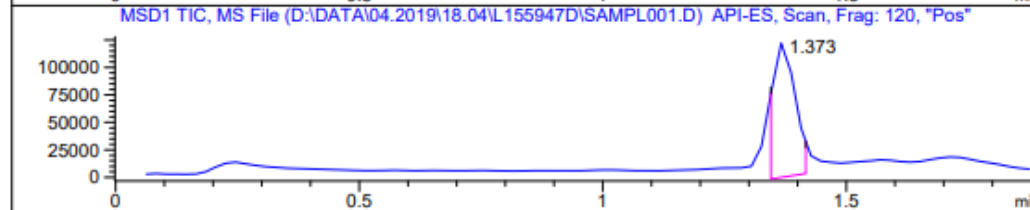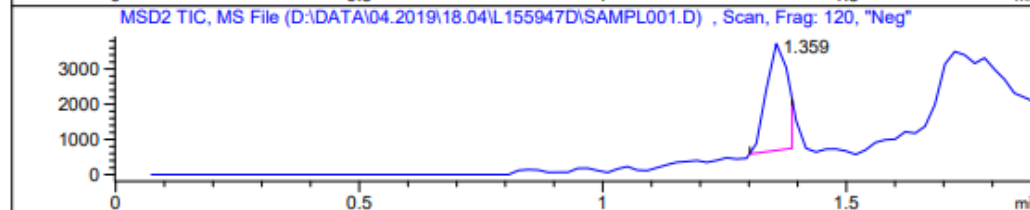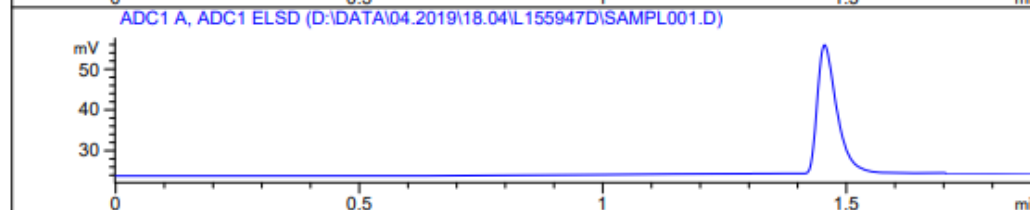

RT 1.373

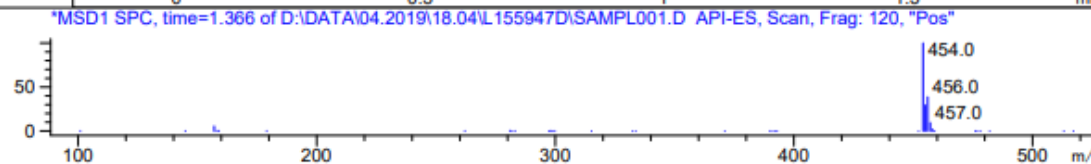

RT 1.359

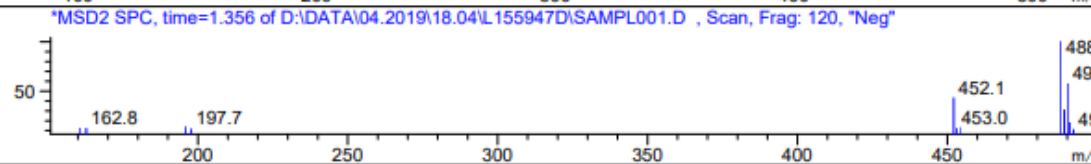

<sup>1</sup>H NMR spectrum of PV-001853441755

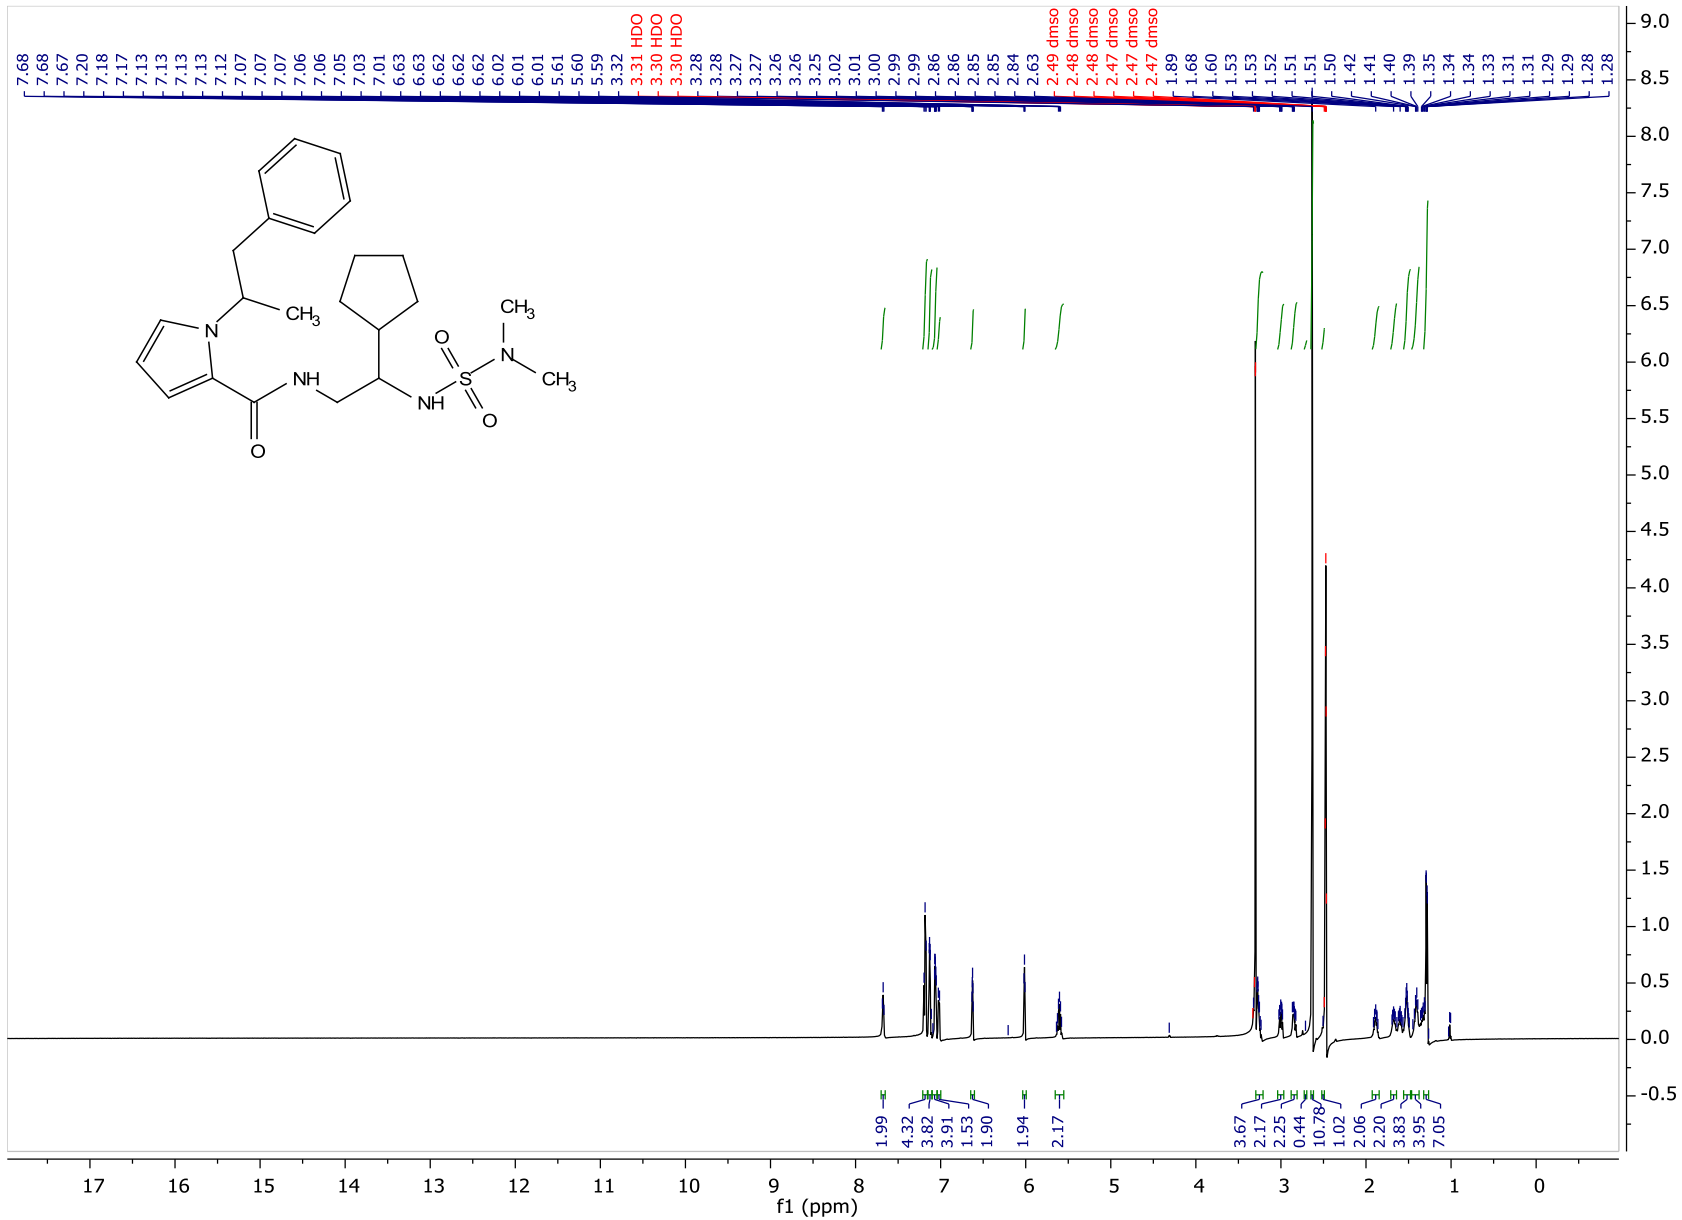



<sup>13</sup>C NMR spectrum of PV-001853441755

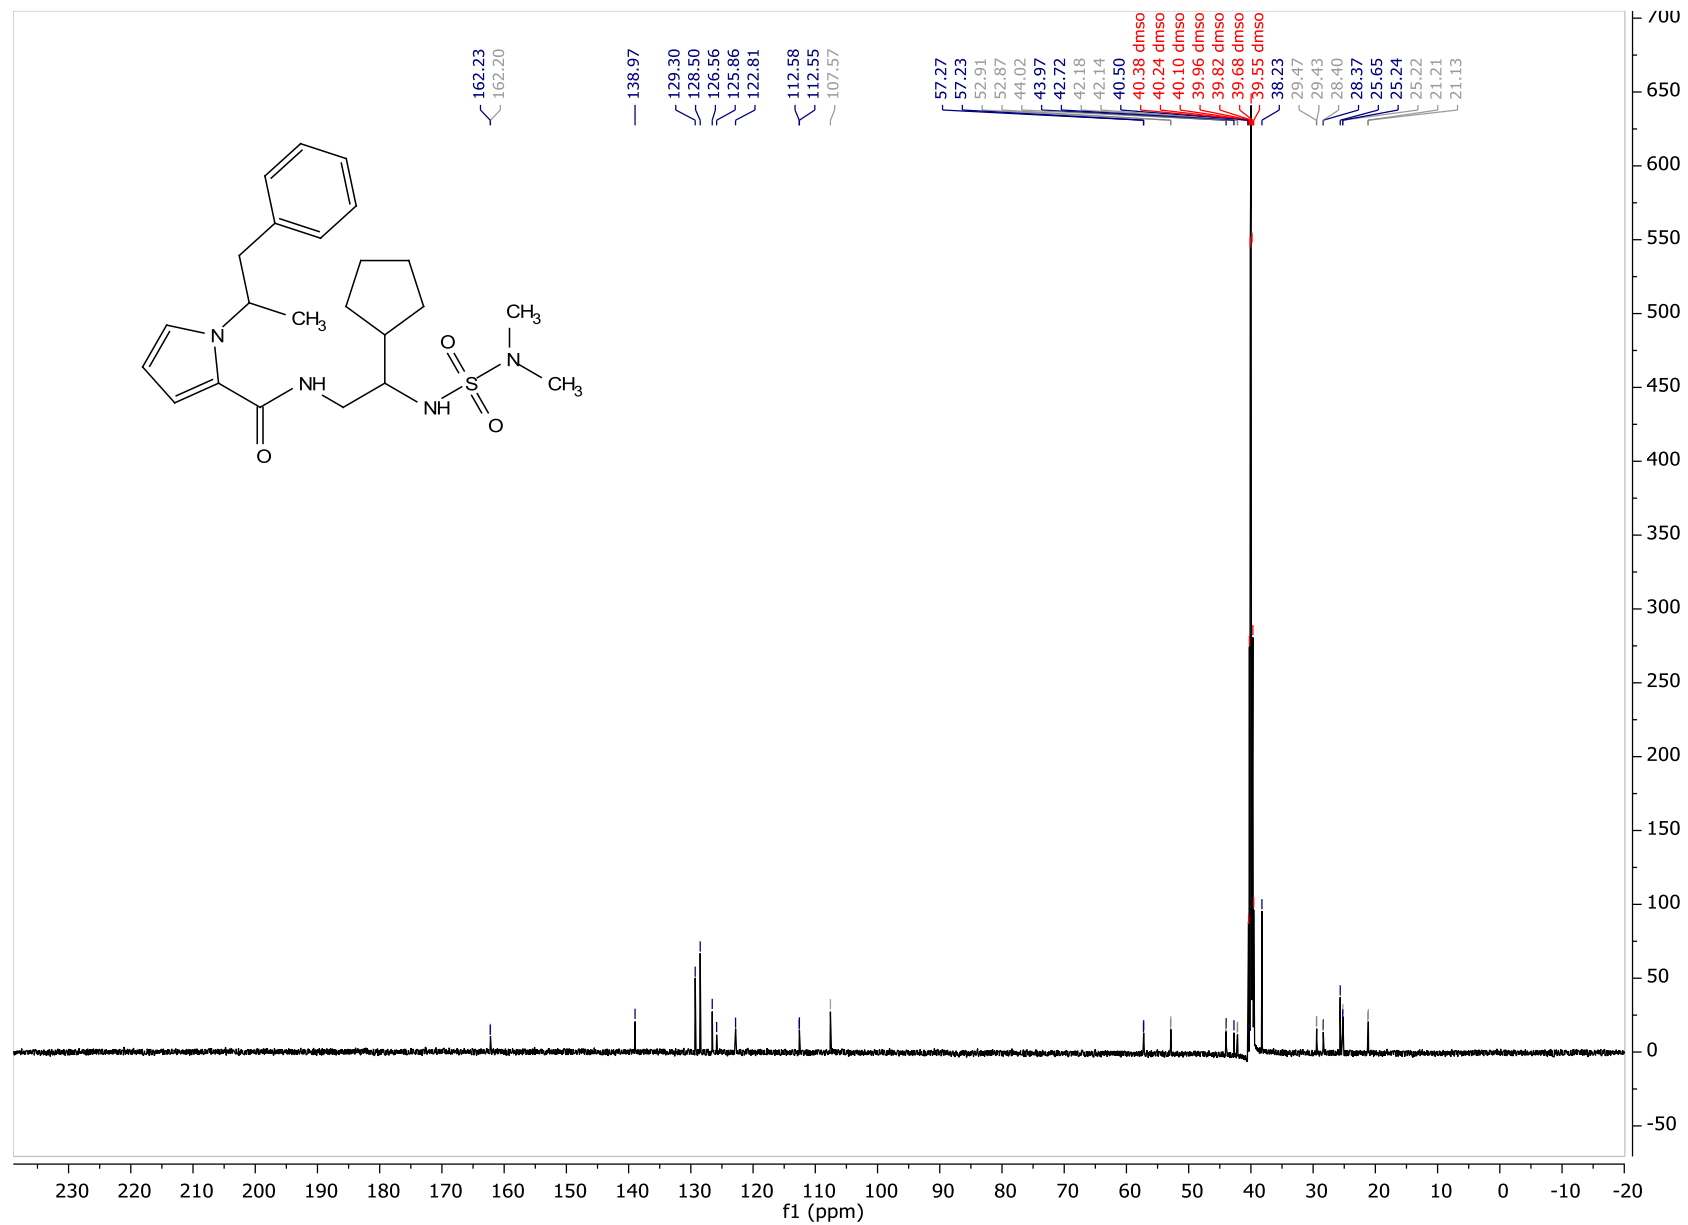

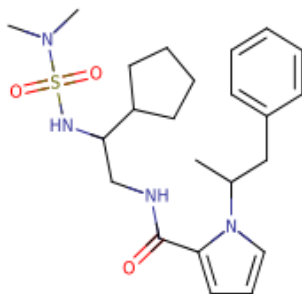

**Mol Wt** 446.61  
**Exact Mass** 446.28

| # | Time  | Area%  |
|---|-------|--------|
| 1 | 1.555 | 100.00 |

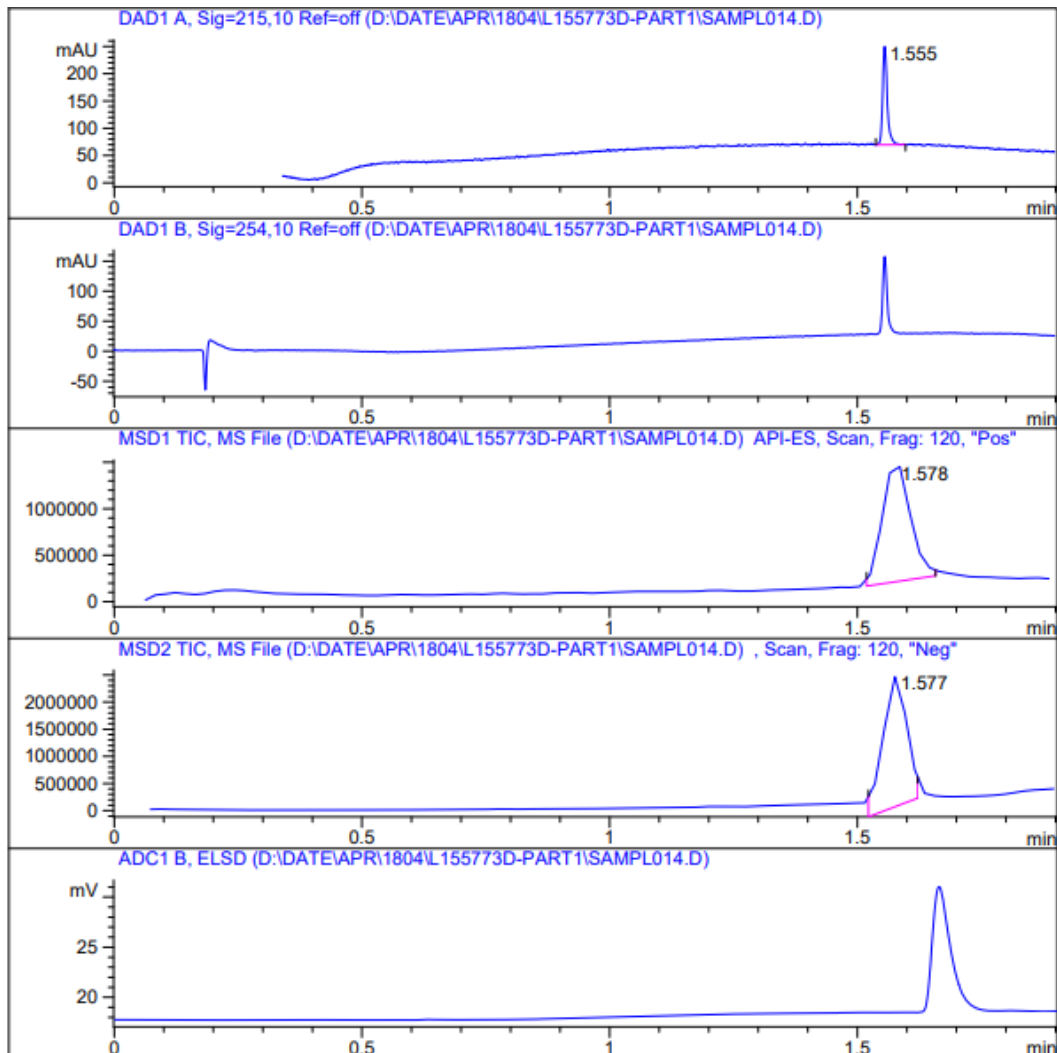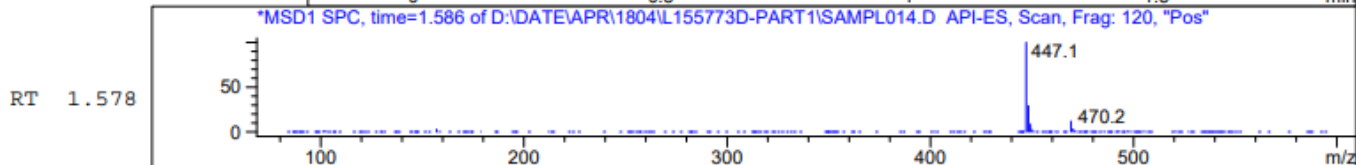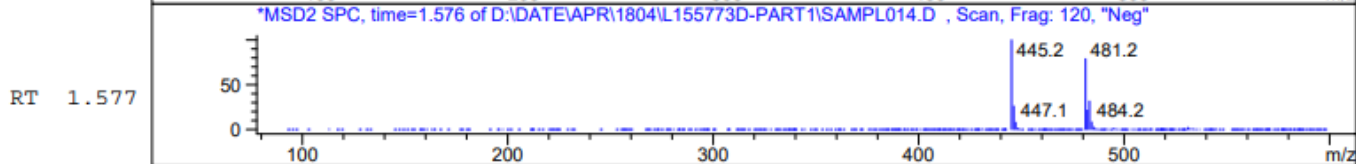

<sup>1</sup>H NMR spectrum of PV-001856731120

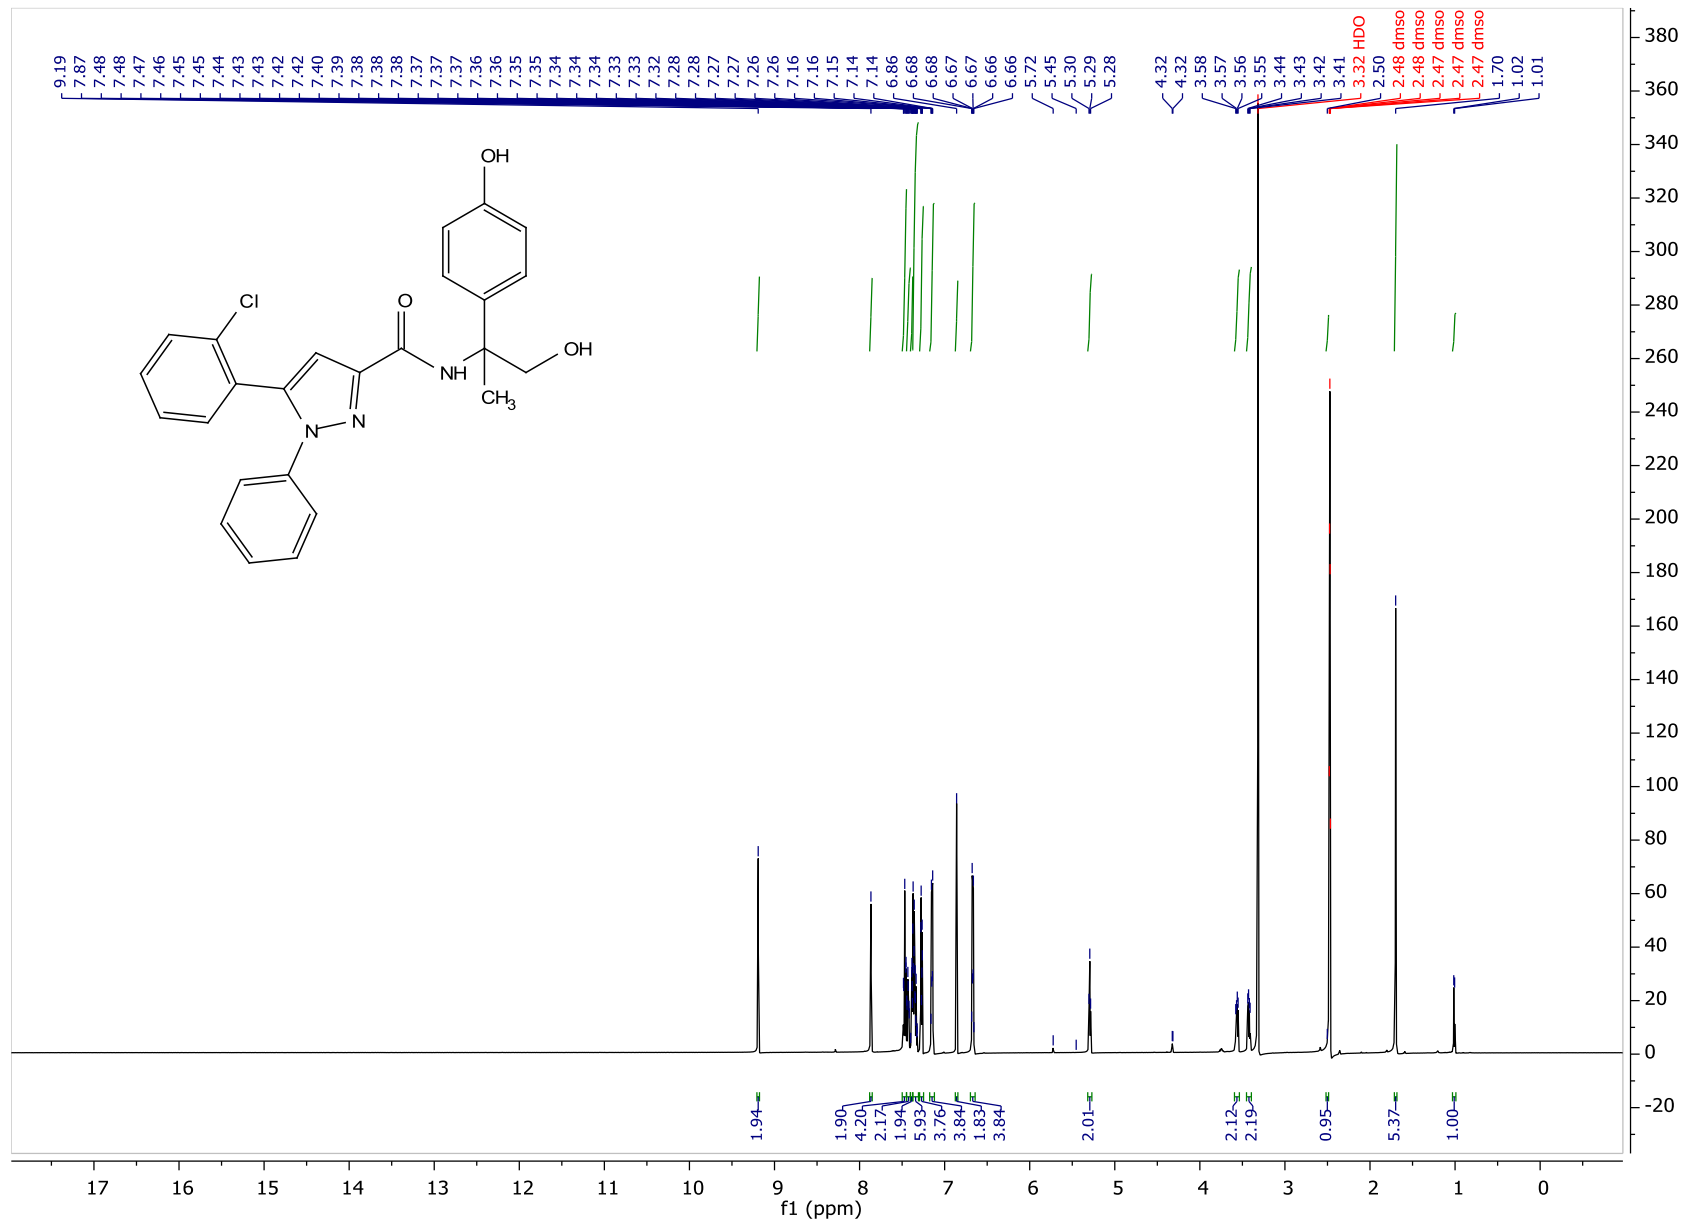

<sup>13</sup>C NMR spectrum of PV-001856731120

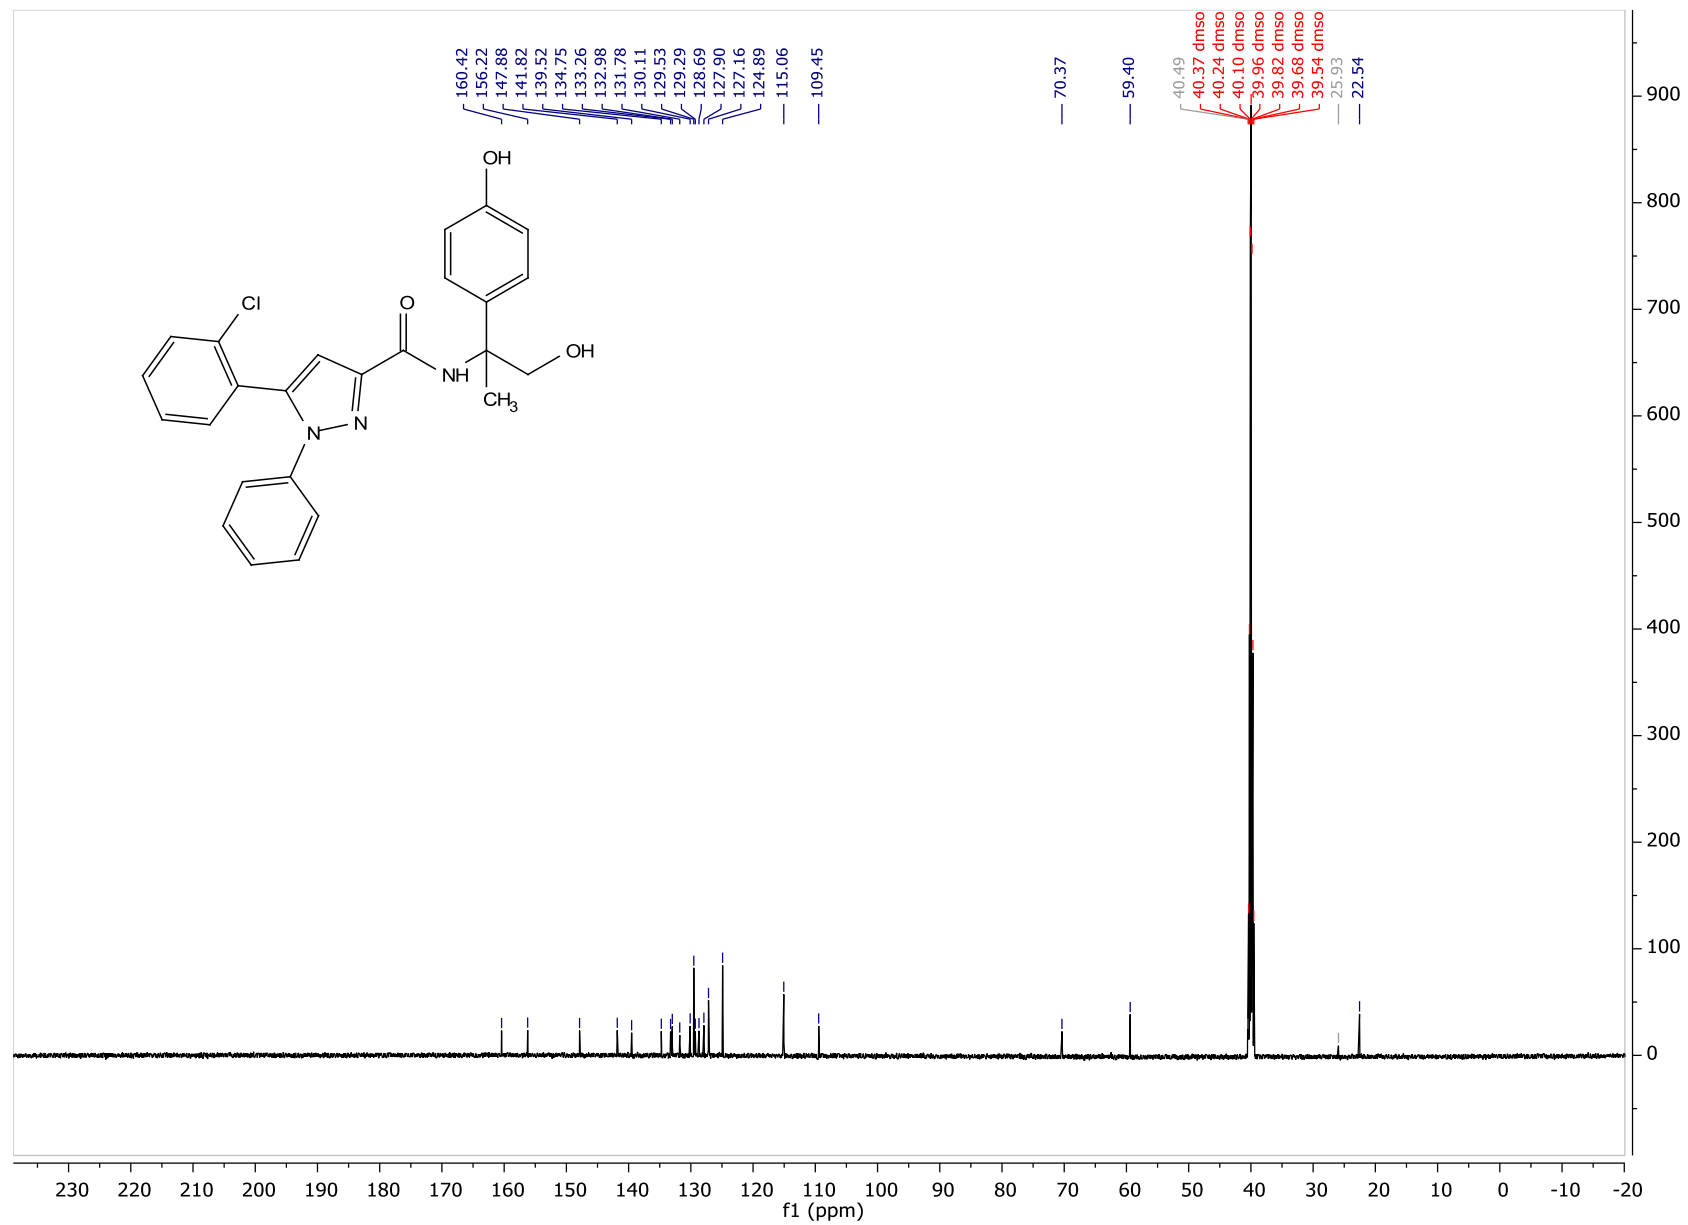

LC/MS spectrum of PV-001856731120

Ret\_Time: 1.366 min

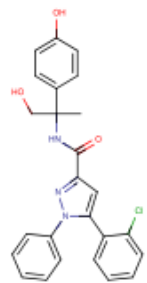

Mol Wt 447.91  
Exact Mass 447.16

| # | Time  | Area% |
|---|-------|-------|
| 1 | 1.326 | 9.58  |
| 2 | 1.366 | 90.42 |

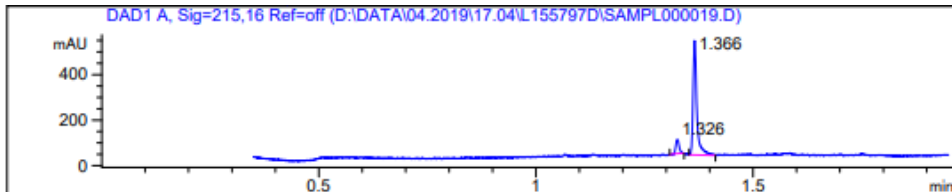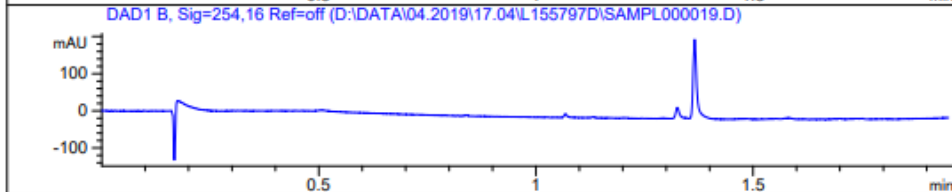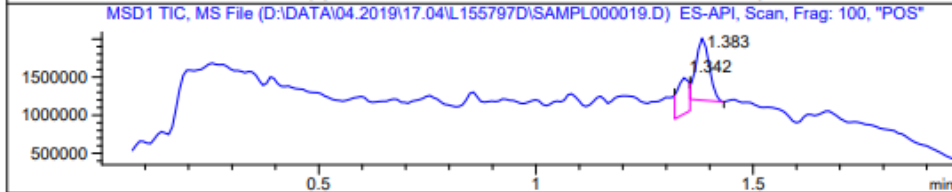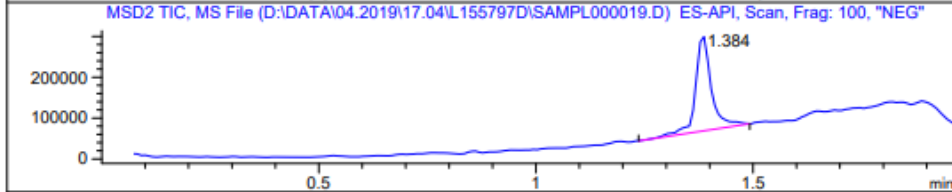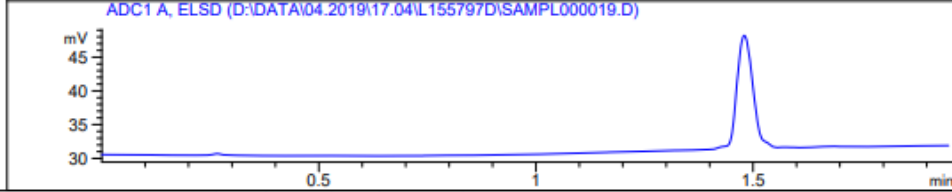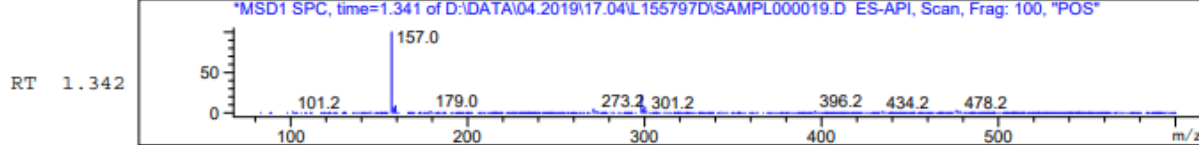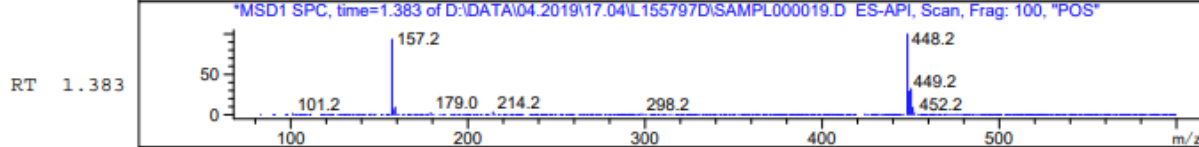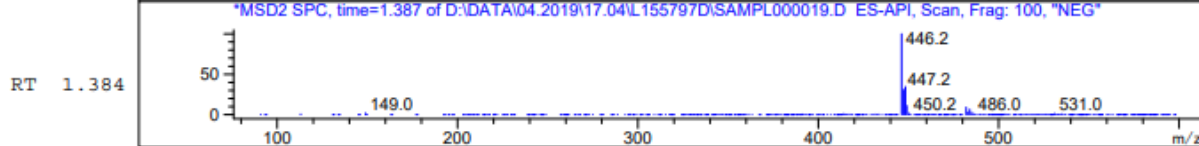

<sup>1</sup>H NMR spectrum of PV-001945154150

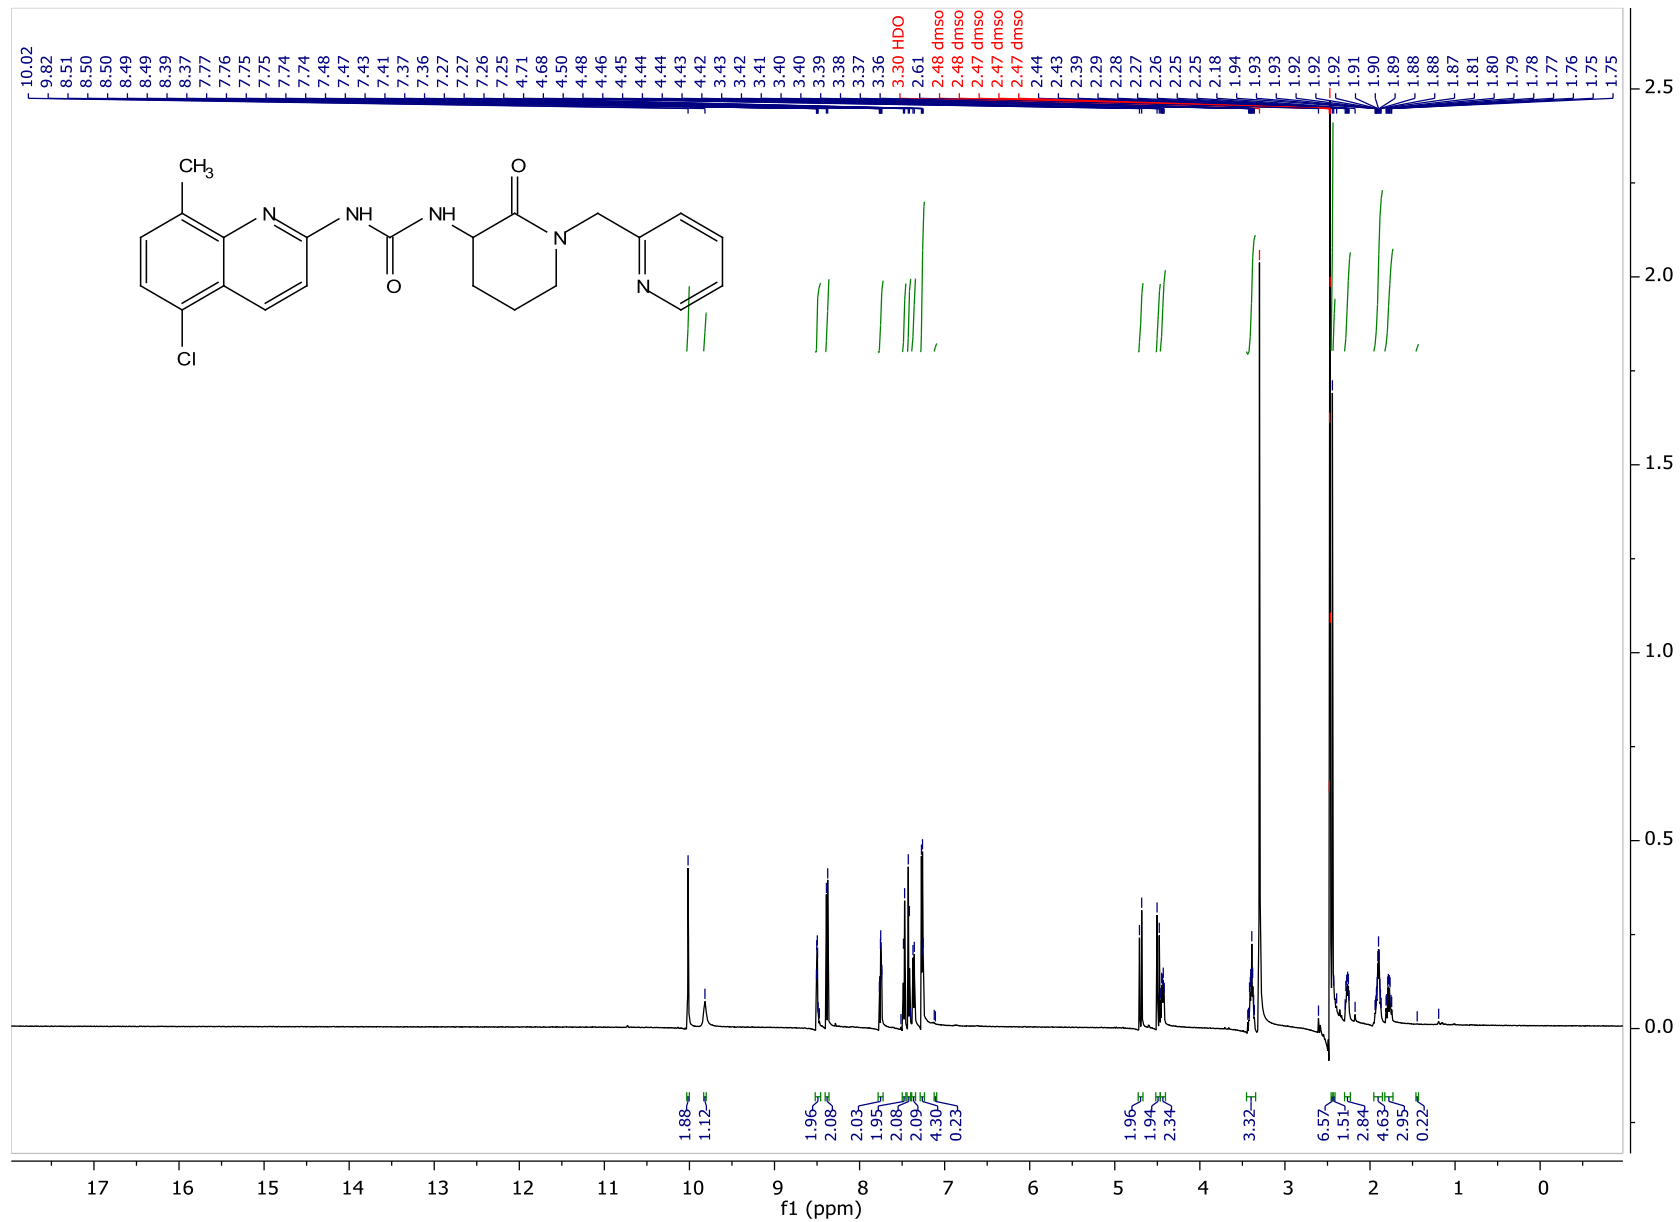

<sup>13</sup>C NMR spectrum of PV-001945154150

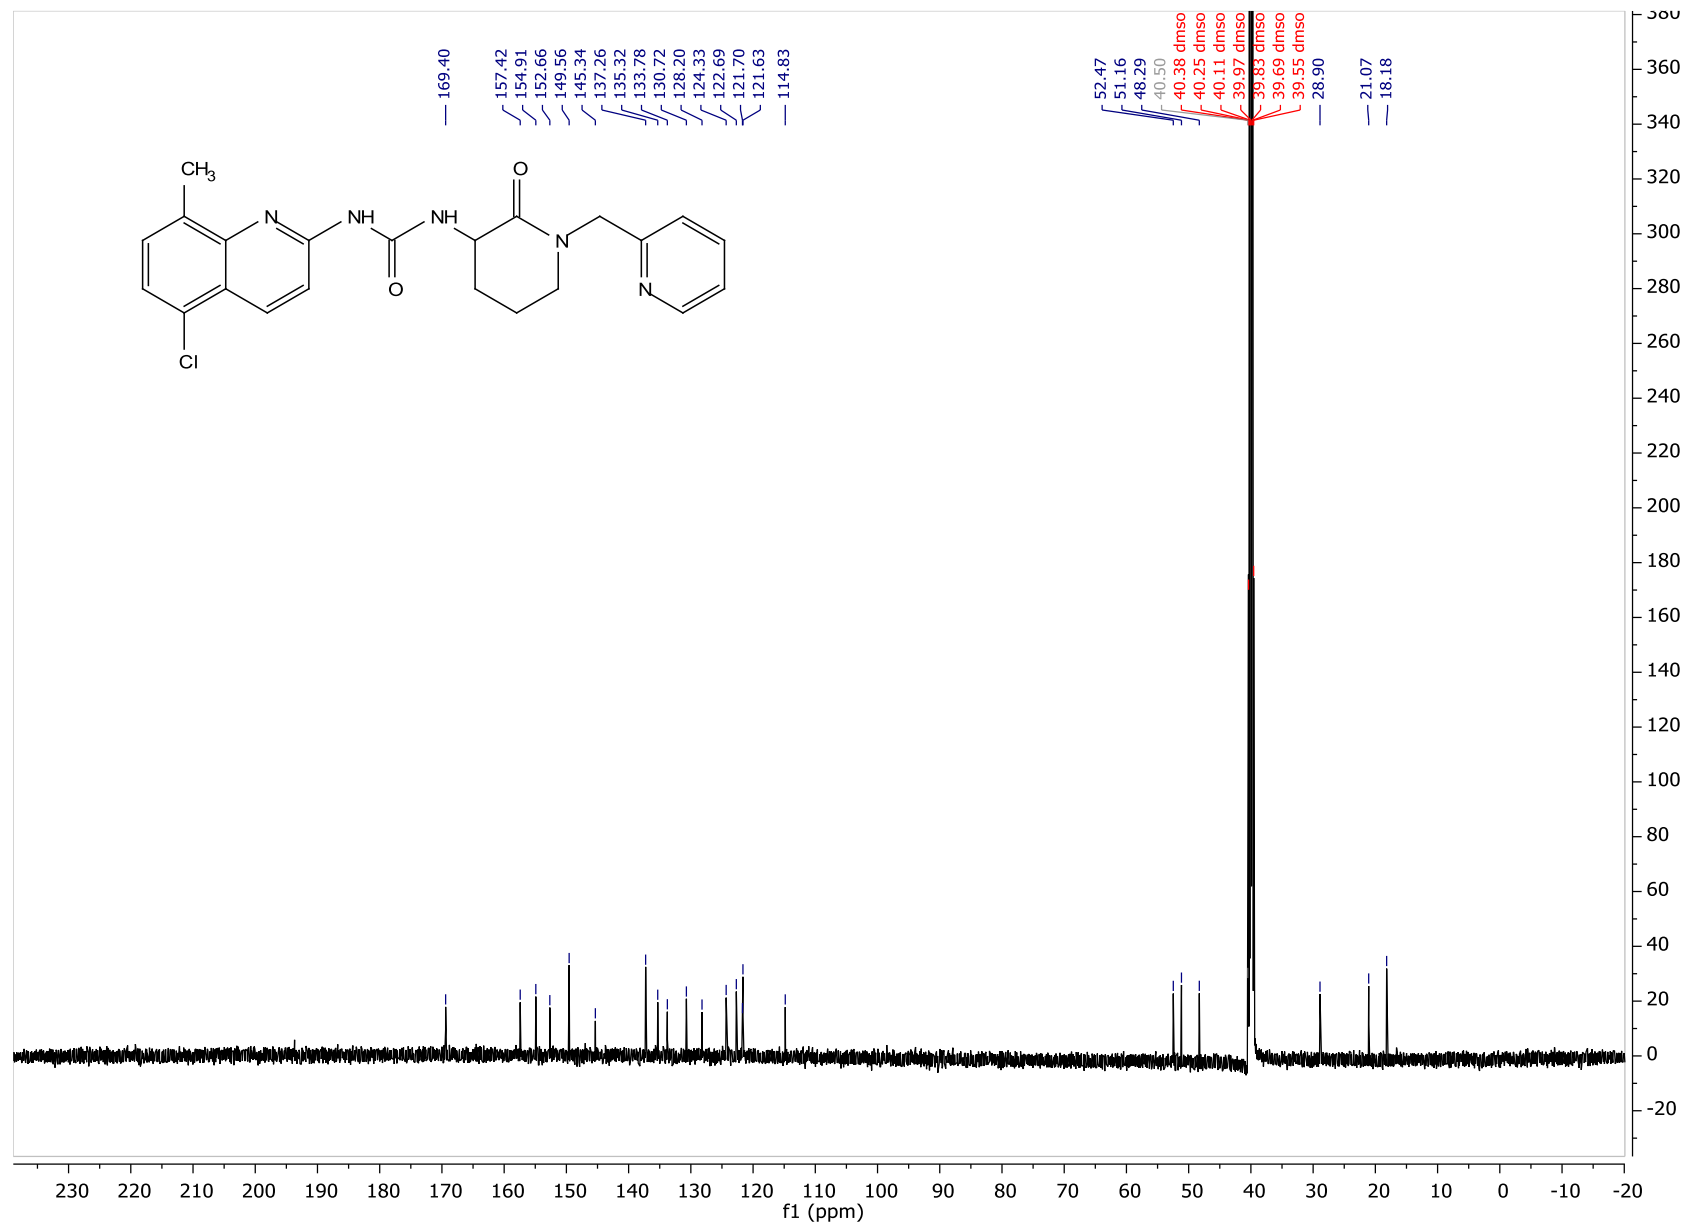

Ret\_Time: 1.163 min

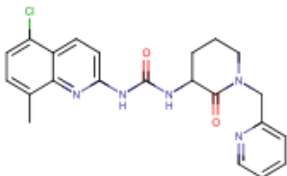

**Mol Wt** 423.9  
**Exact Mass** 423.17

| # | Time  | Area%  |
|---|-------|--------|
| 1 | 1.163 | 100.00 |

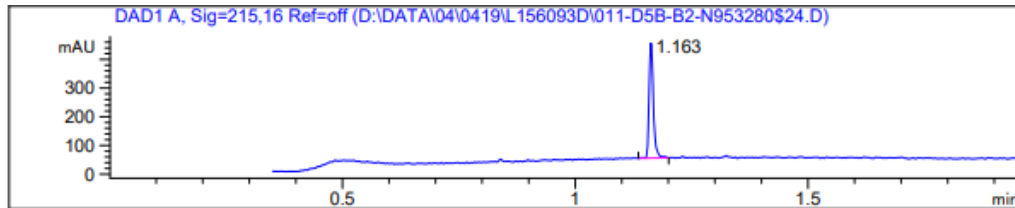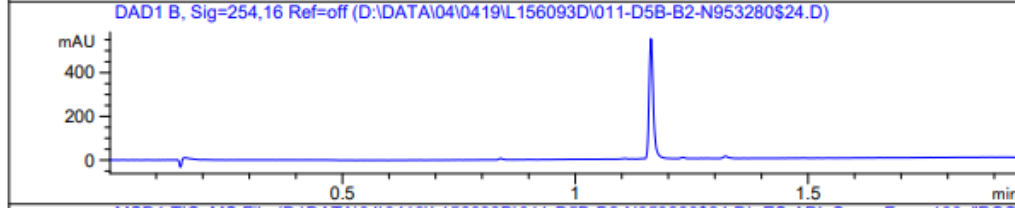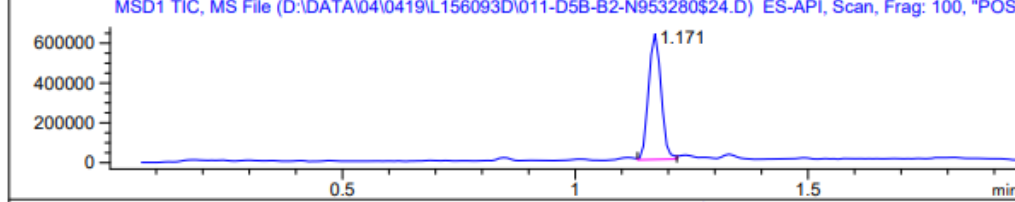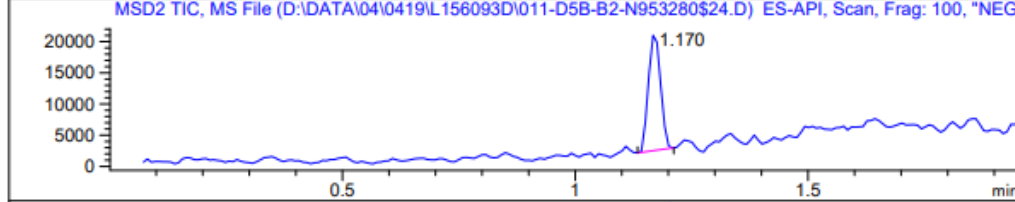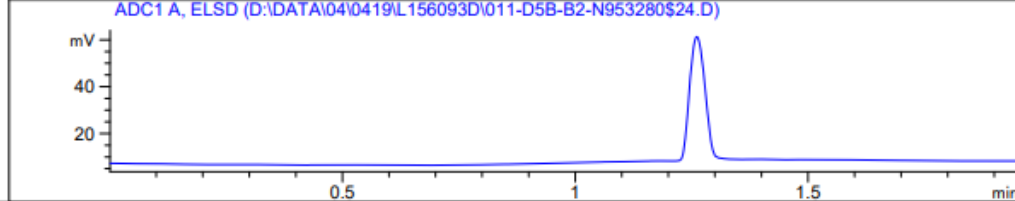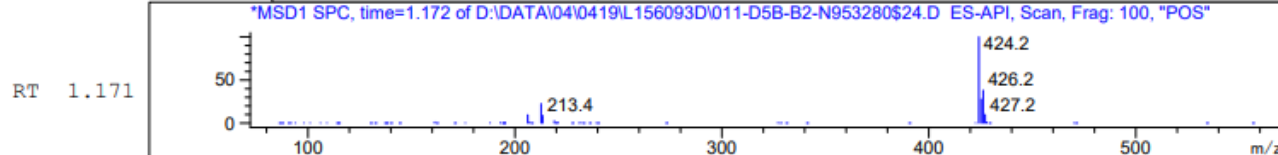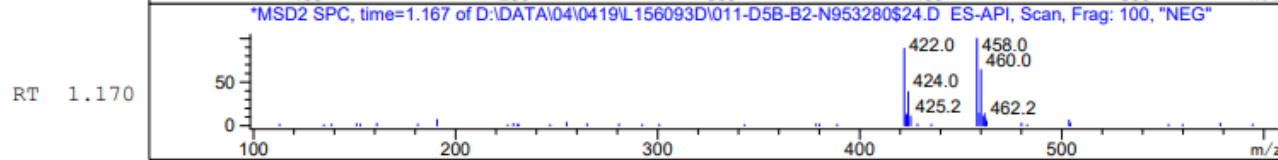



<sup>1</sup>H NMR spectrum of PV-001961067500

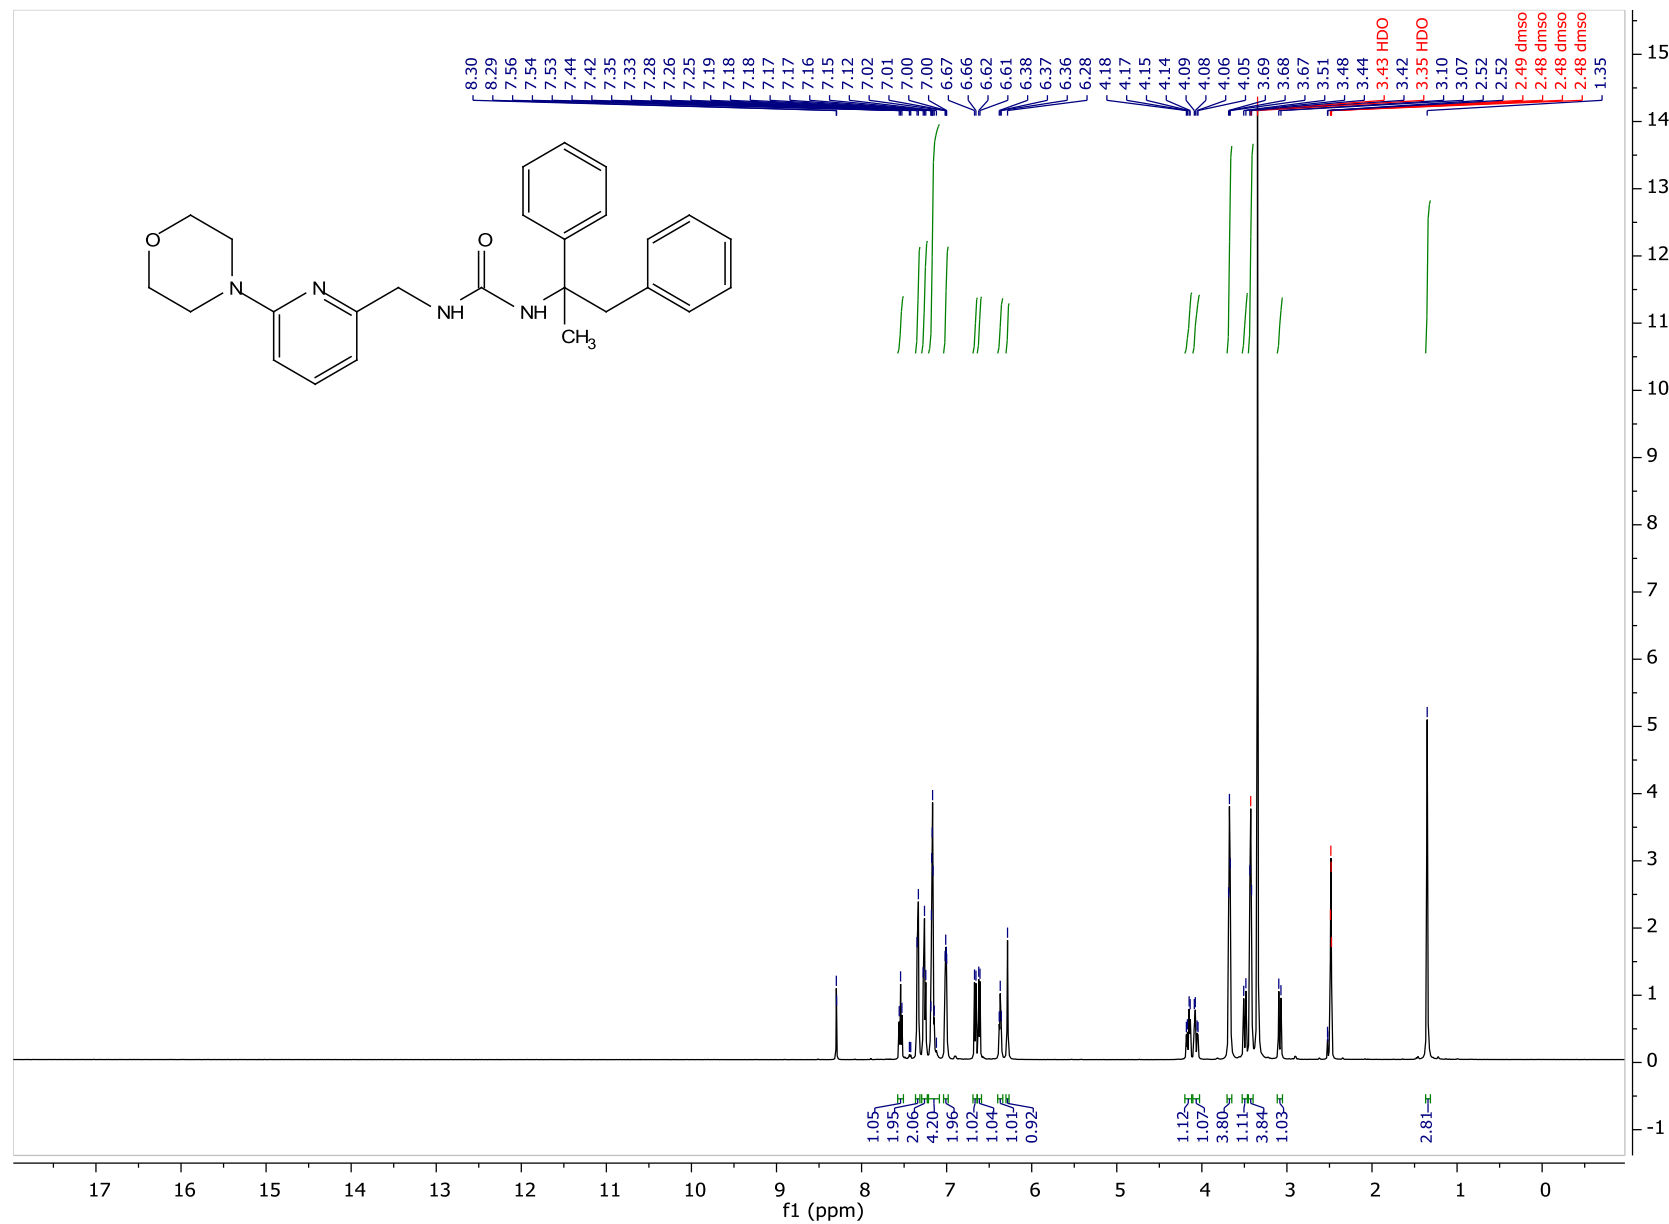

<sup>13</sup>C NMR spectrum of PV-001961067500

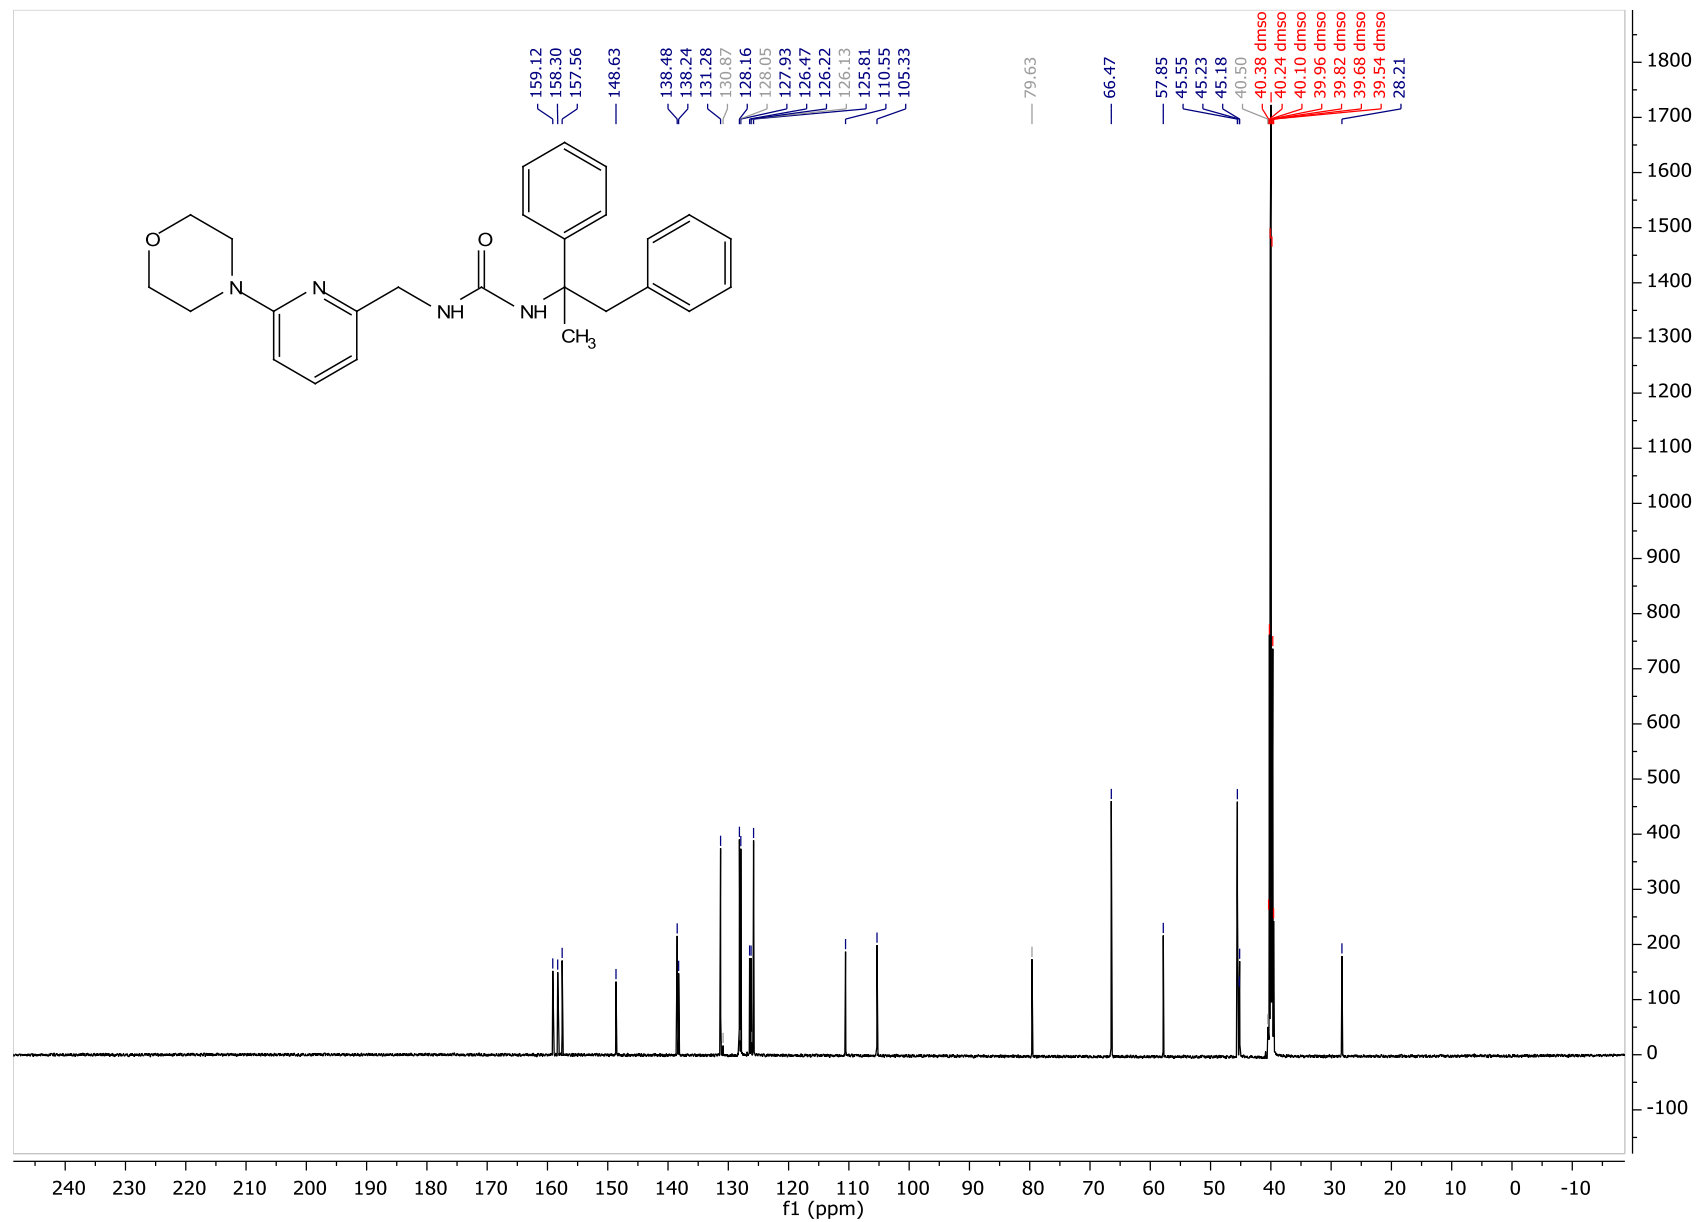

LC/MS spectrum of PV-001961067500

Ret\_Time: 1.203 min

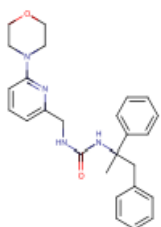

Mol Wt 430.54  
Exact Mass 430.28

| # | Time  | Area% |
|---|-------|-------|
| 1 | 0.941 | 2.16  |
| 2 | 1.203 | 95.68 |
| 3 | 1.387 | 2.16  |

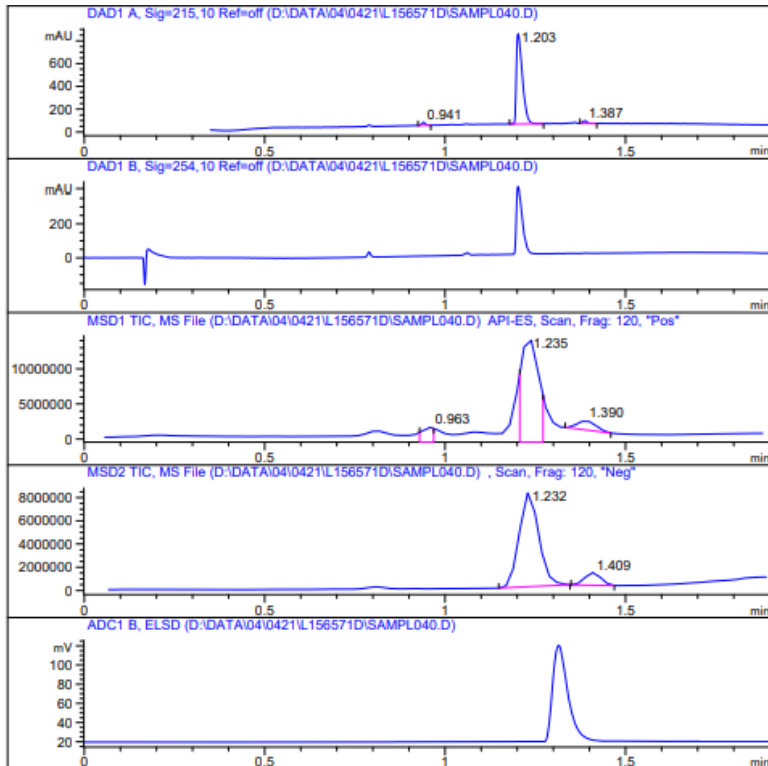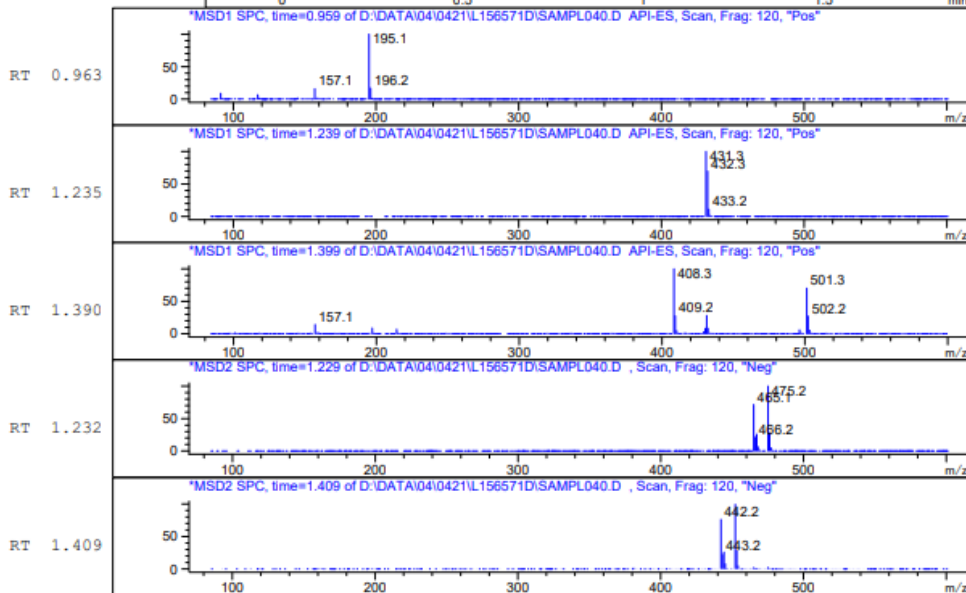

<sup>1</sup>H NMR spectrum of PV-001962076740

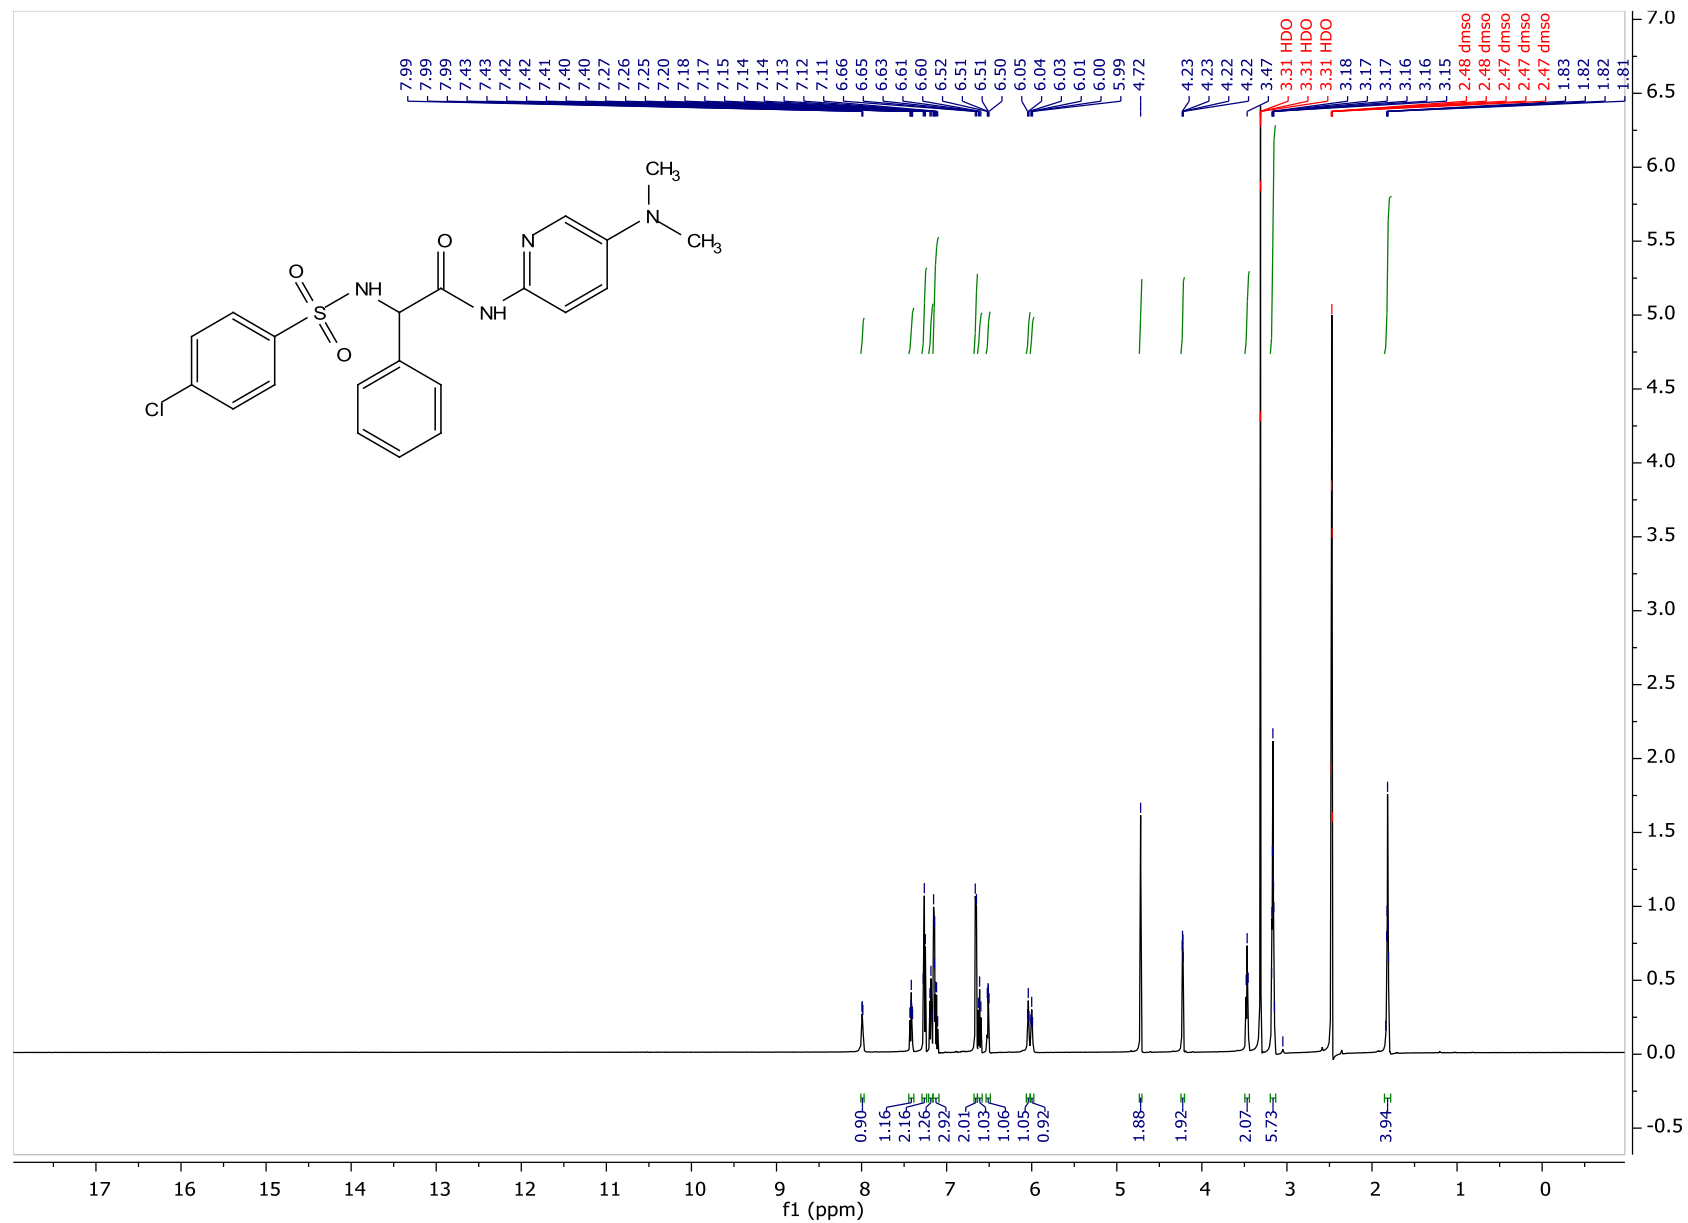

<sup>13</sup>C NMR spectrum of PV-001962076740

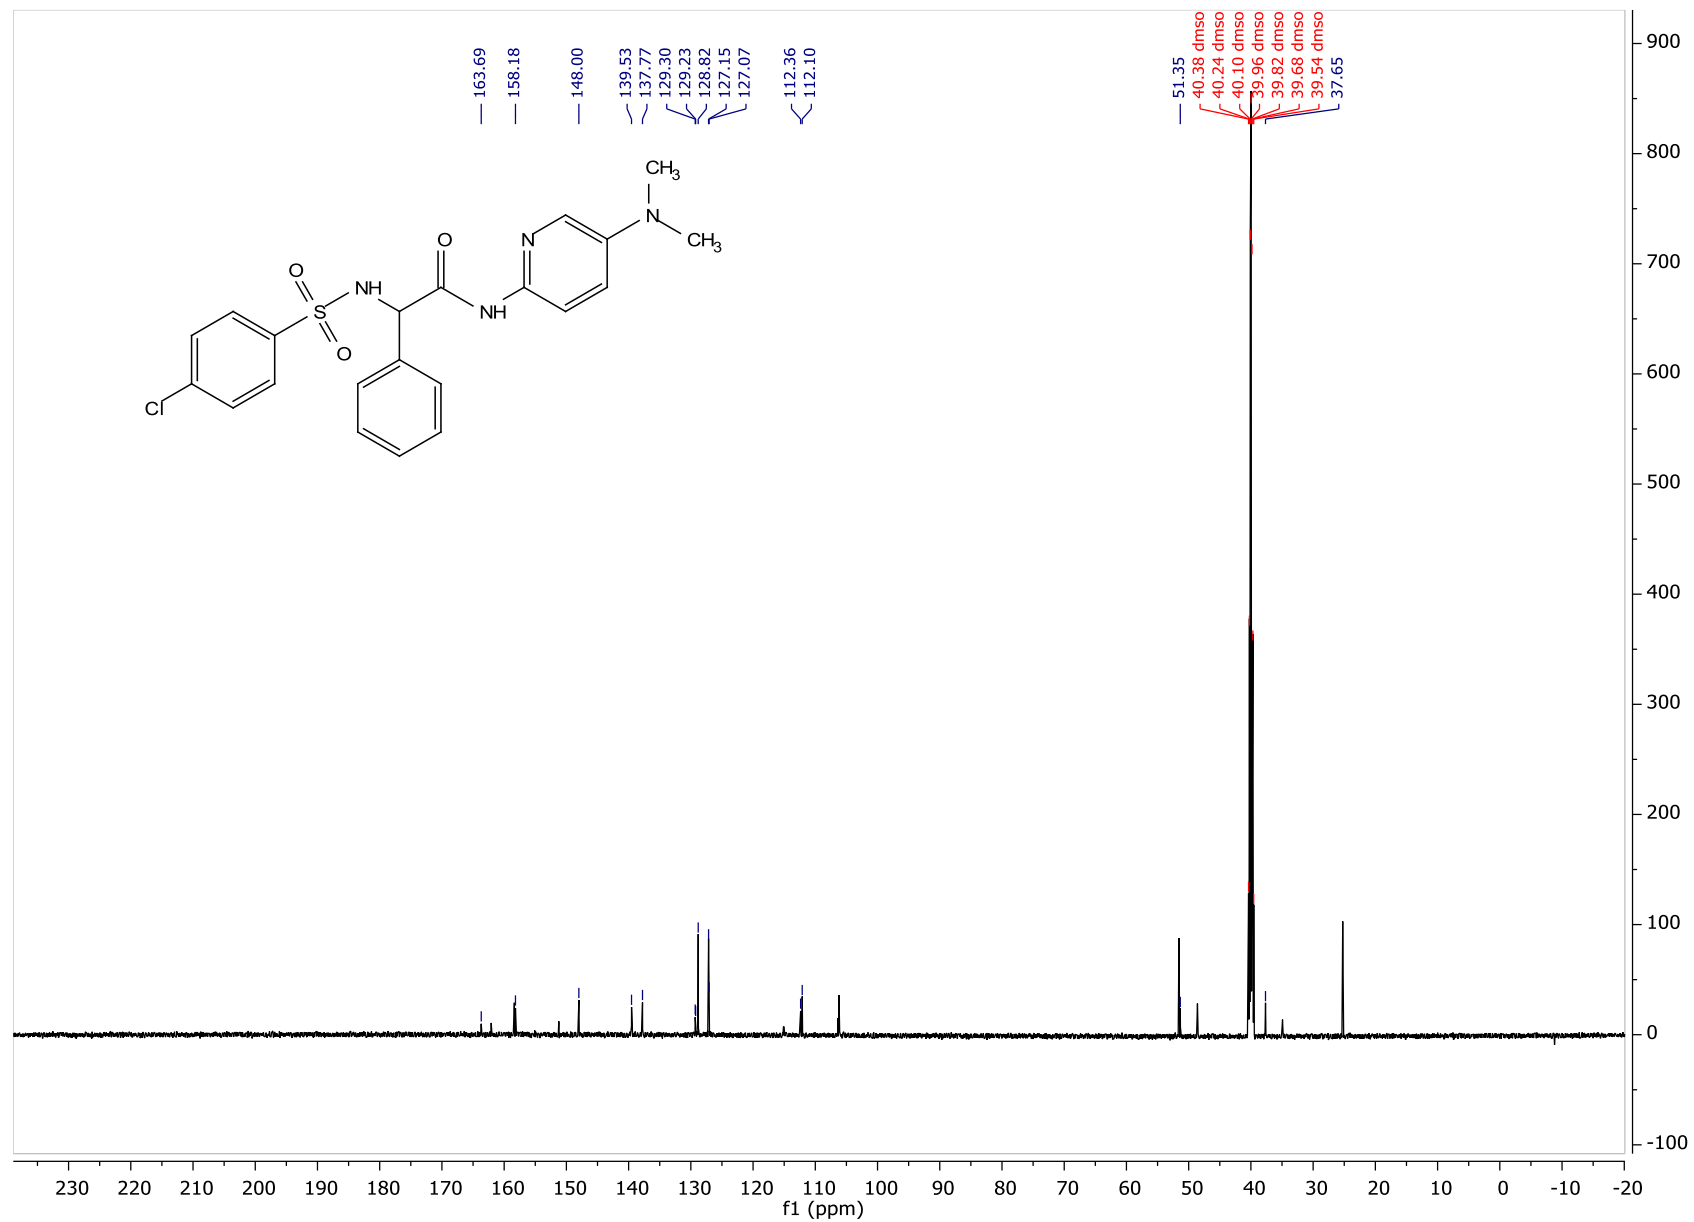

LC/MS spectrum of PV-001962076740

Ret\_Time: 1.007 min

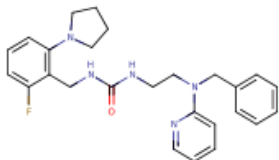

Mol Wt 447.55  
Exact Mass 447.29

| # | Time  | Area% |
|---|-------|-------|
| 1 | 0.914 | 2.35  |
| 2 | 1.007 | 97.65 |

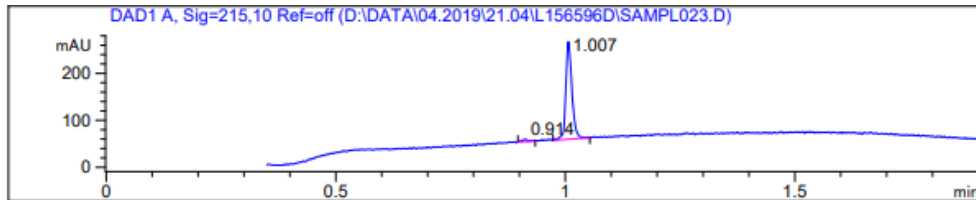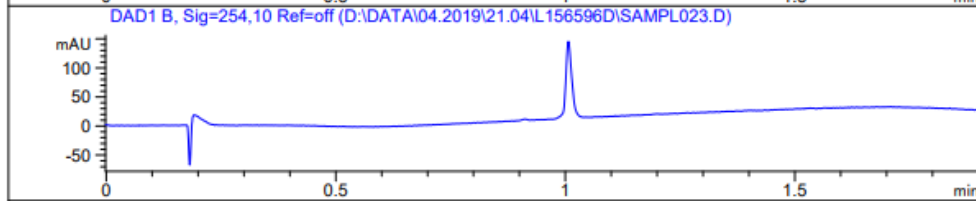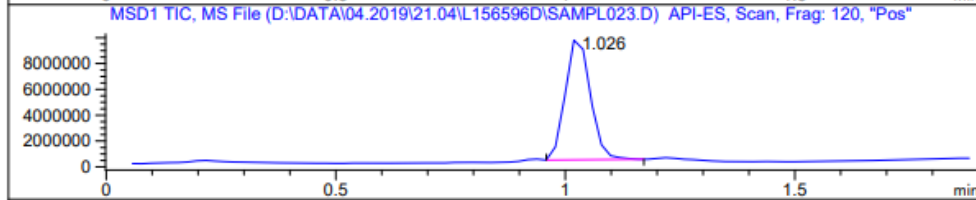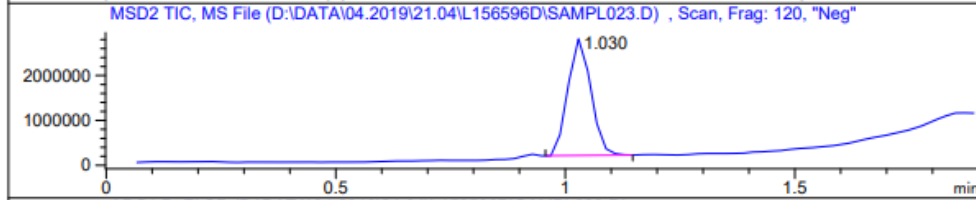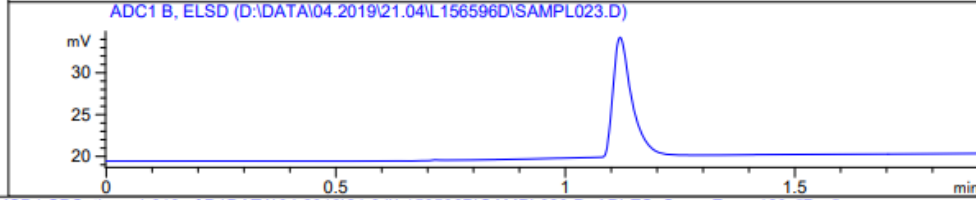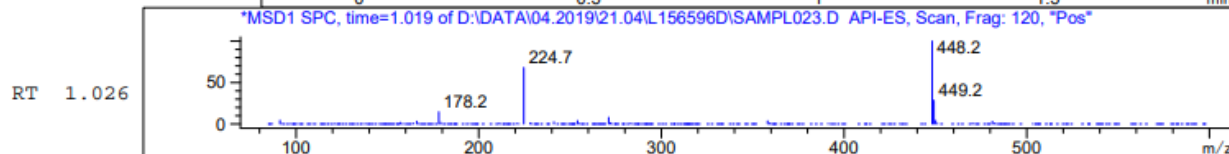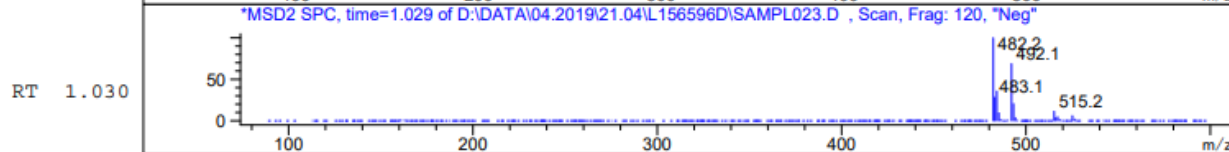

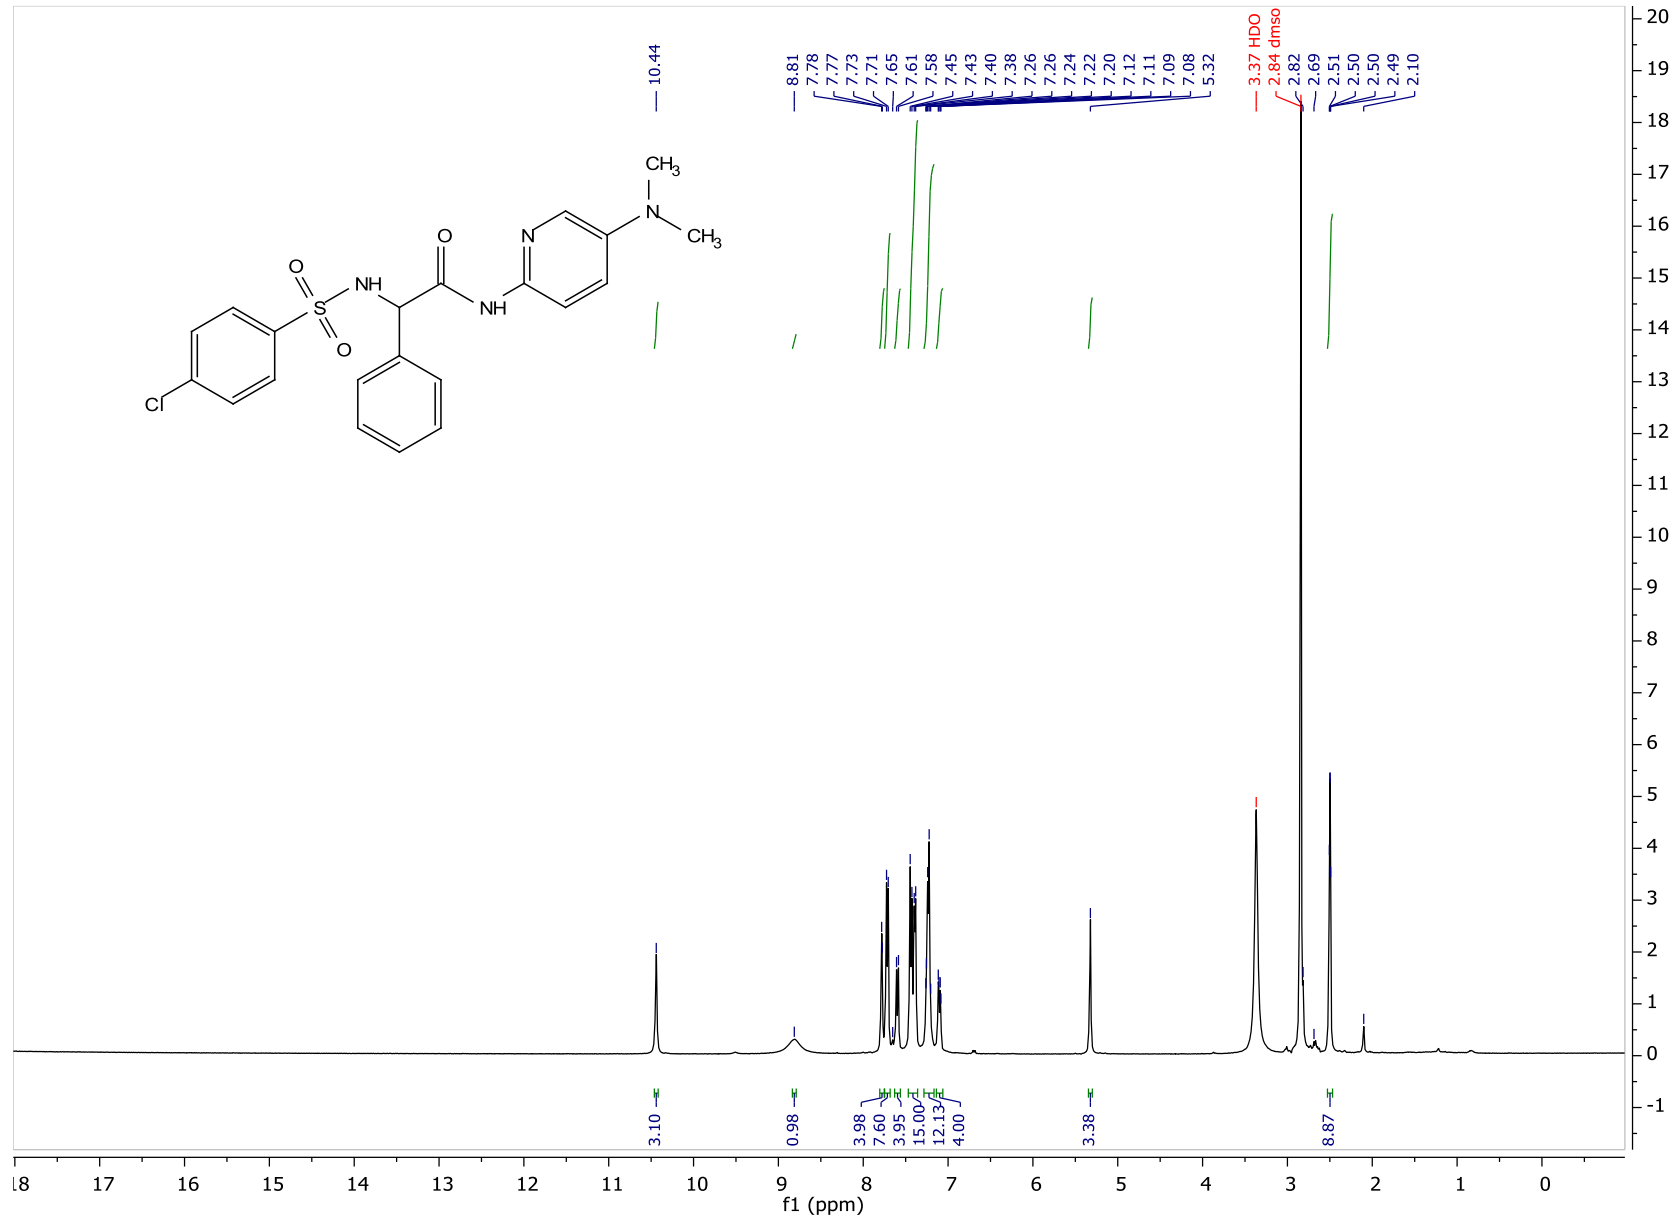

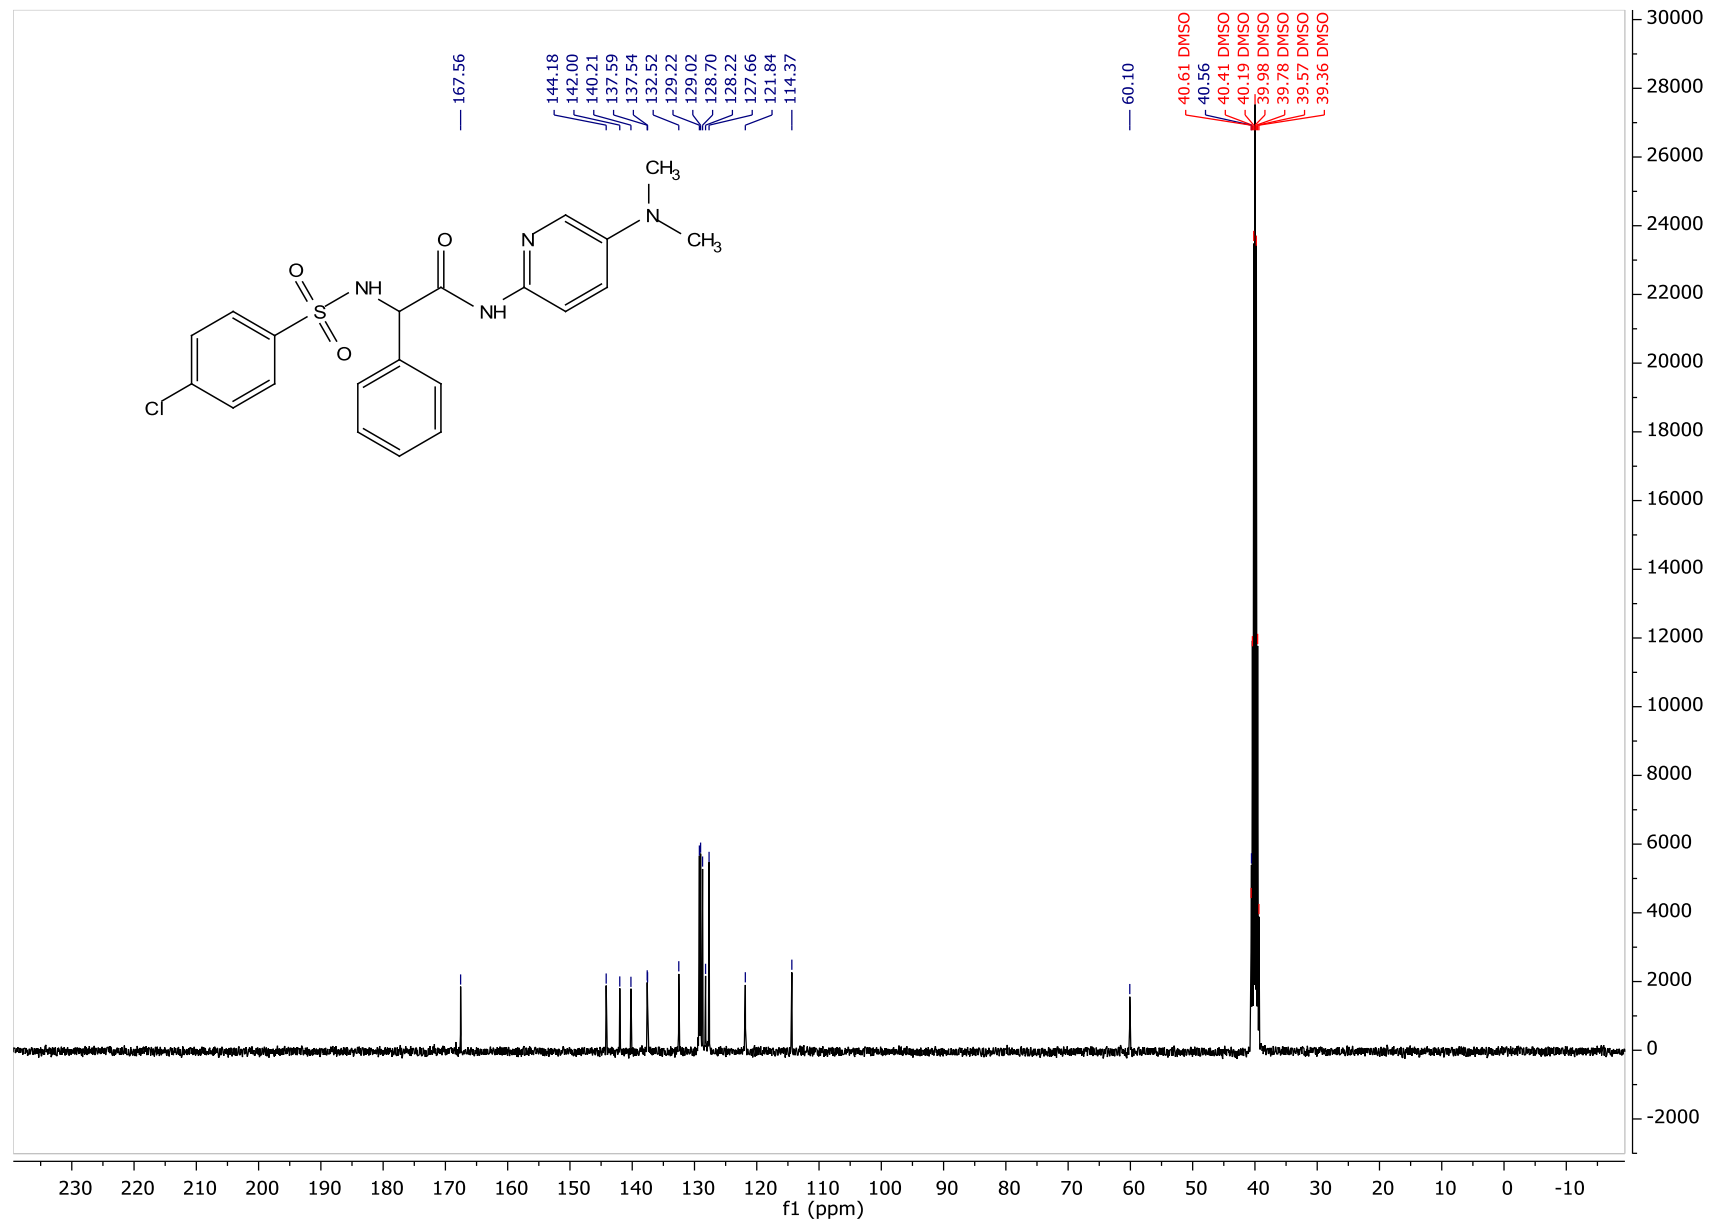



LC/MS spectrum of PV-002089418236

Ret\_Time: 1.333 min

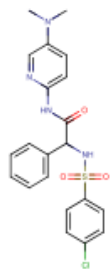

Mol Wt 444.93  
Exact Mass 444.12

| # | Time  | Area% |
|---|-------|-------|
| 1 | 1.333 | 91.35 |
| 2 | 1.432 | 5.17  |
| 3 | 1.458 | 3.48  |

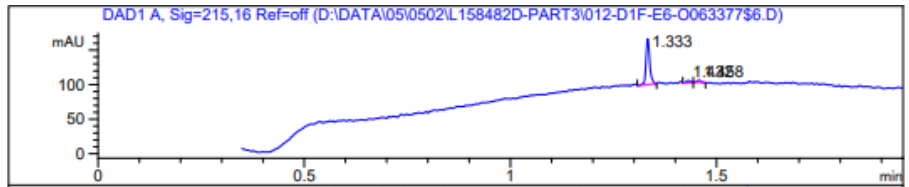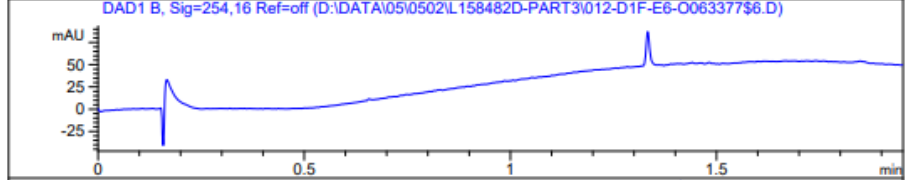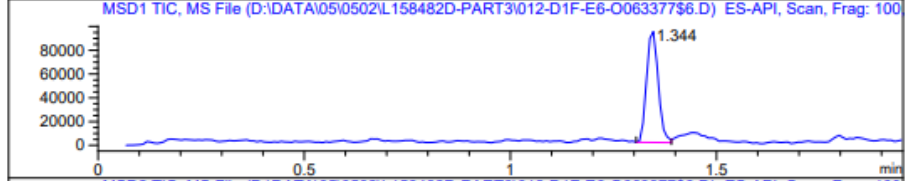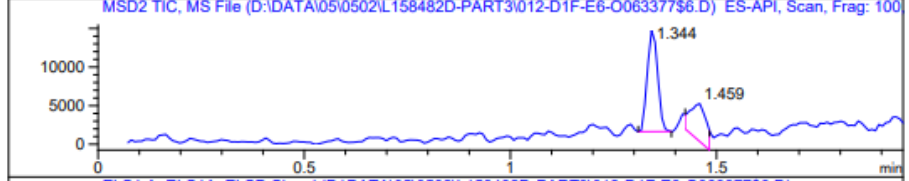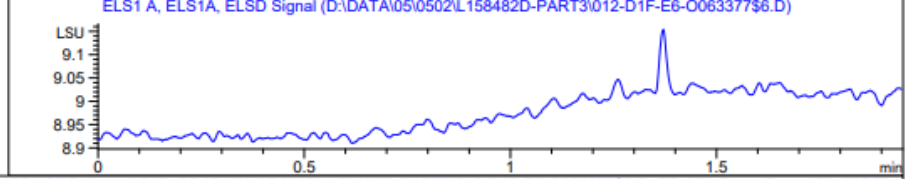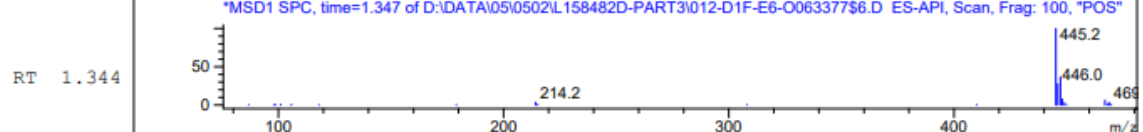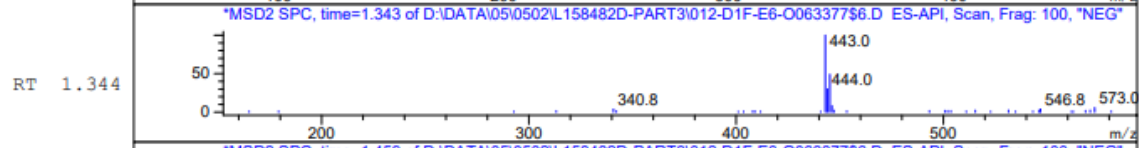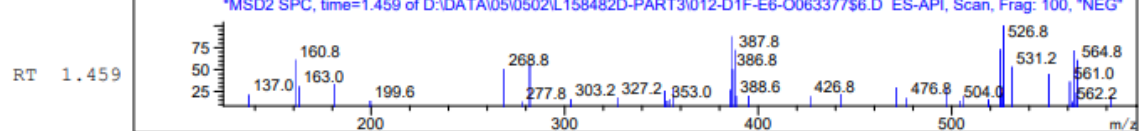

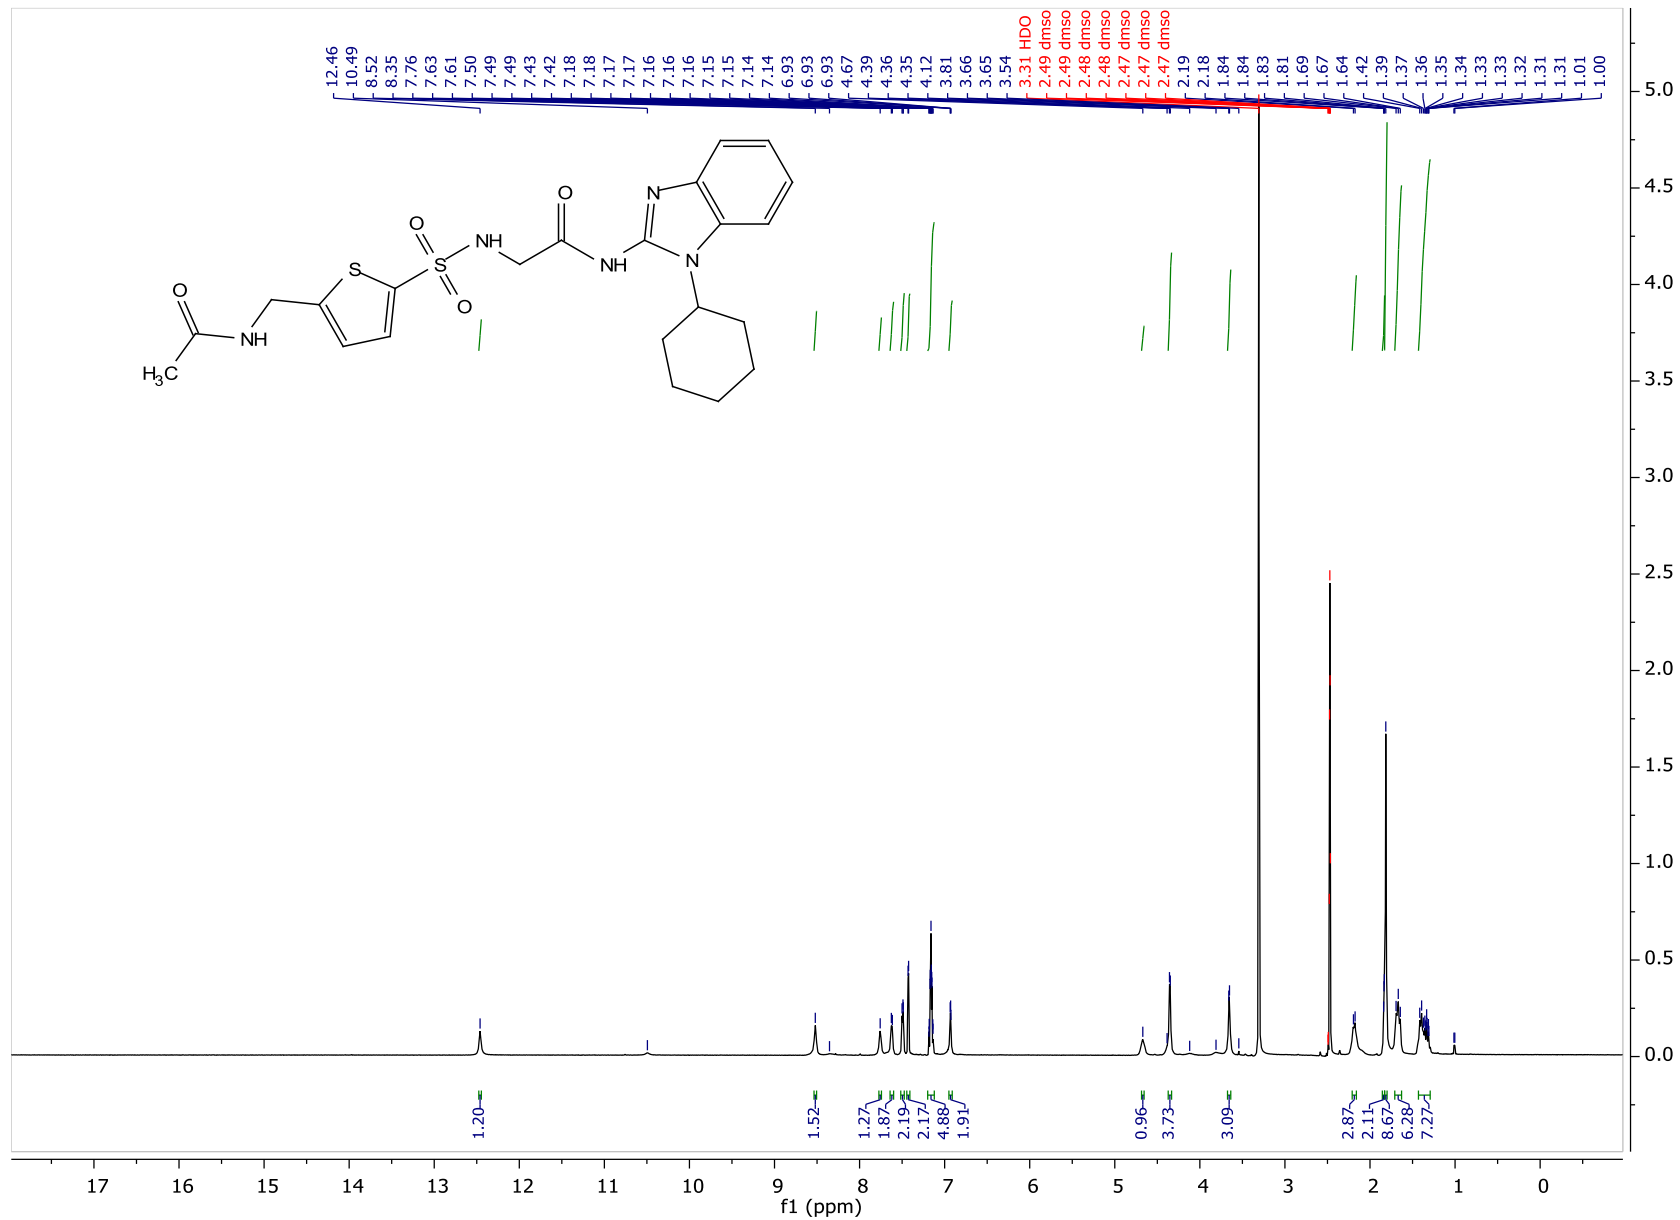

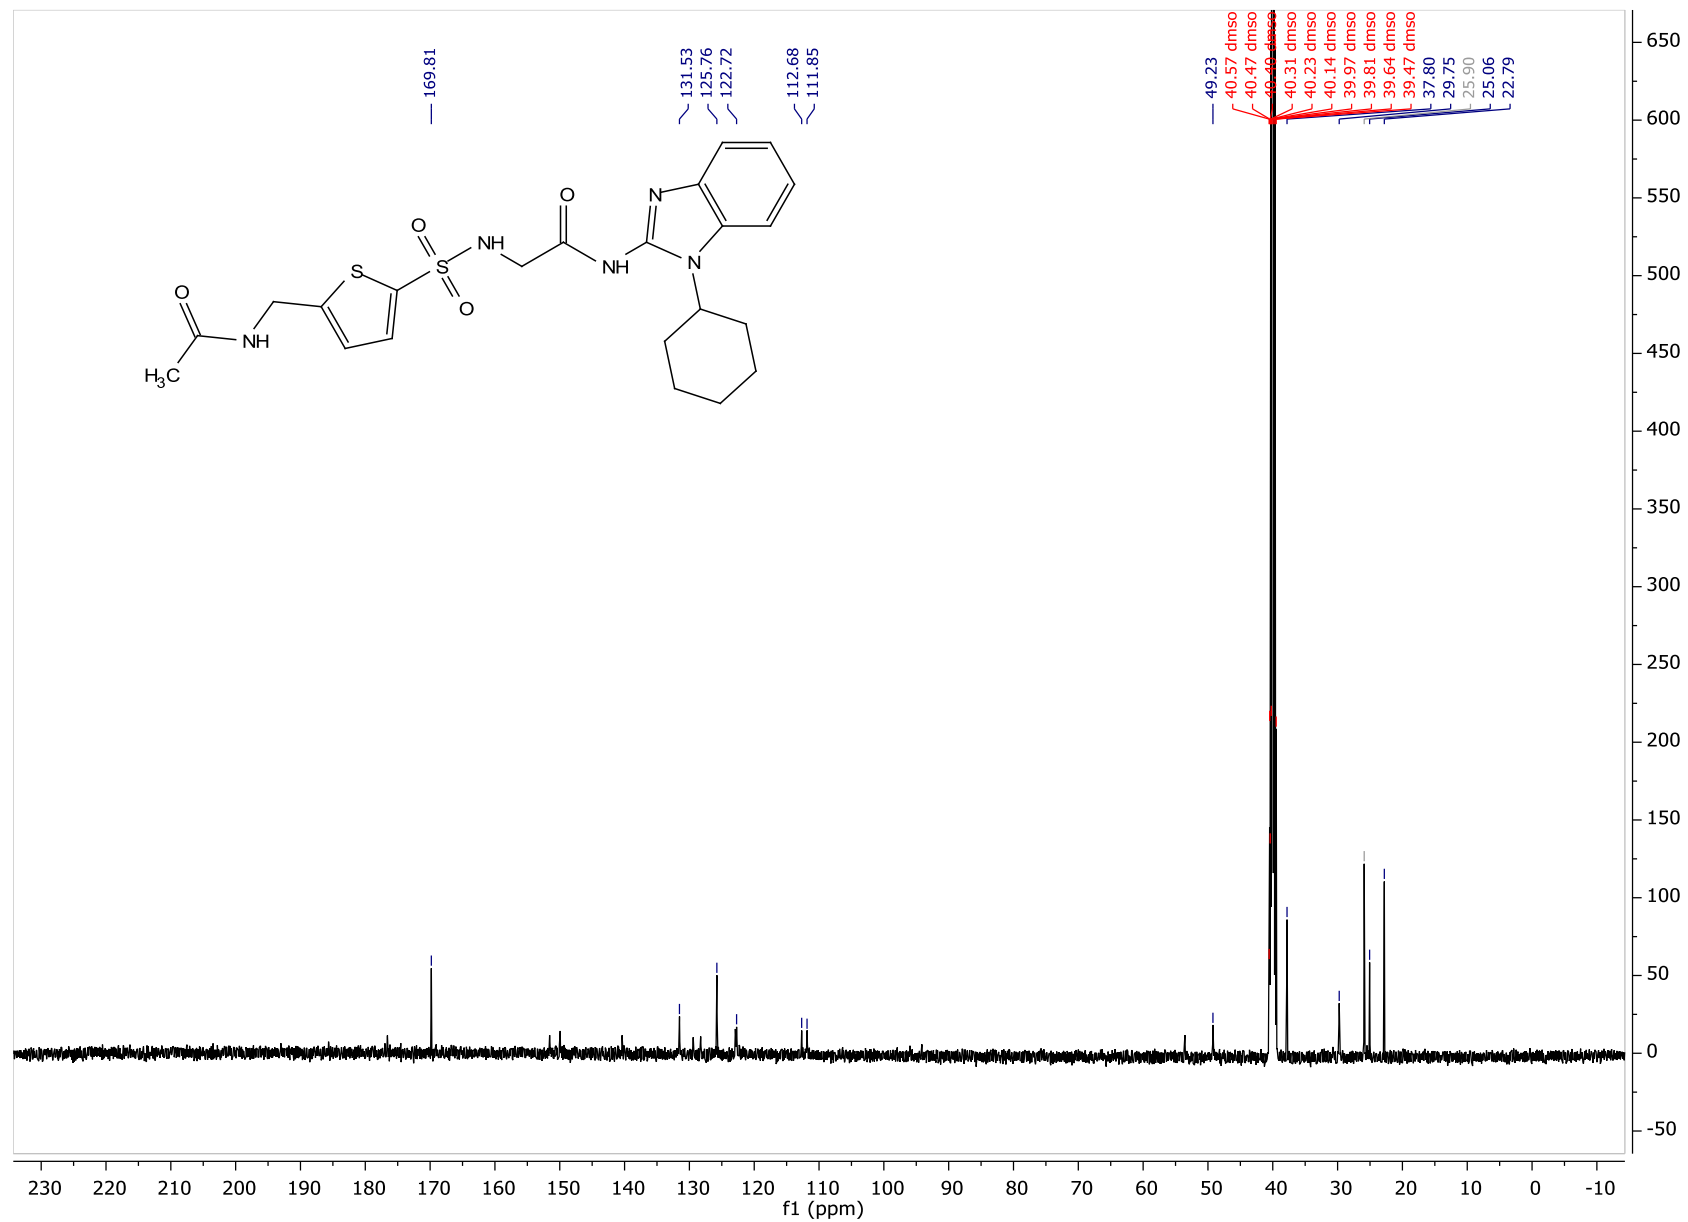

Ret\_Time: 1.223 min

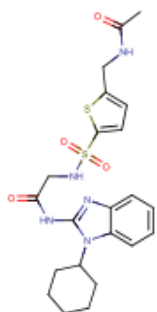

**Mol Wt** 489.61  
**Exact Mass** 489.17

| # | Time  | Area%  |
|---|-------|--------|
| 1 | 1.223 | 100.00 |

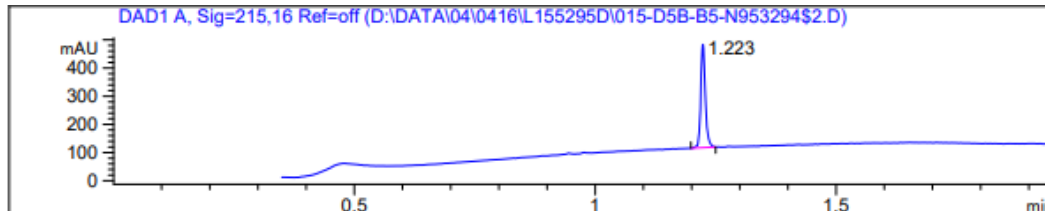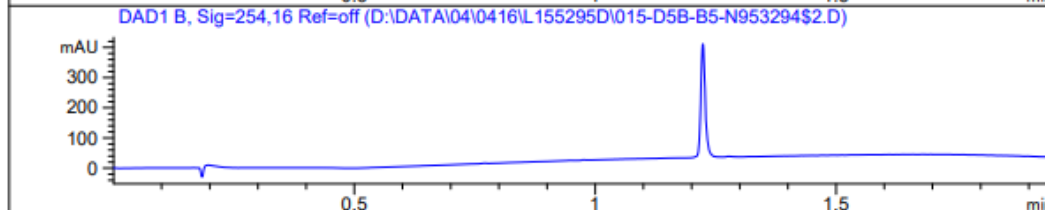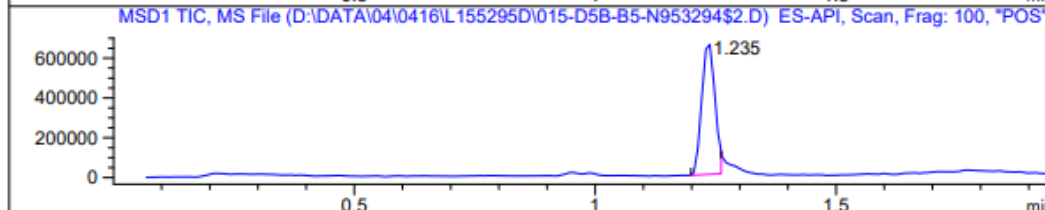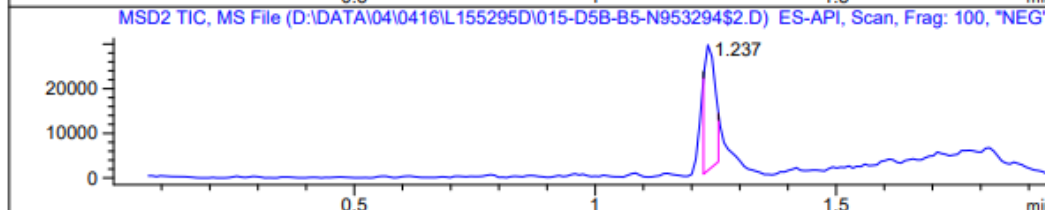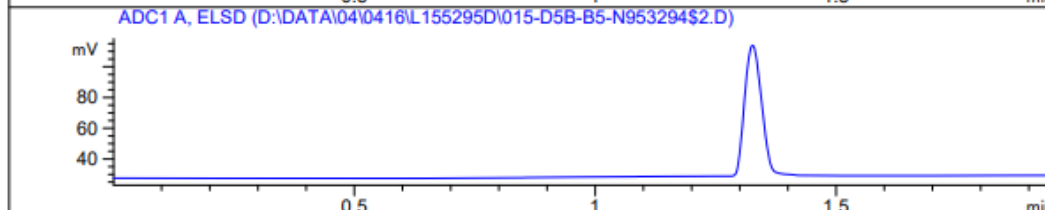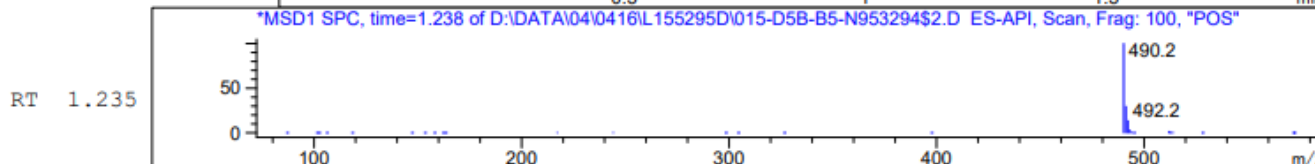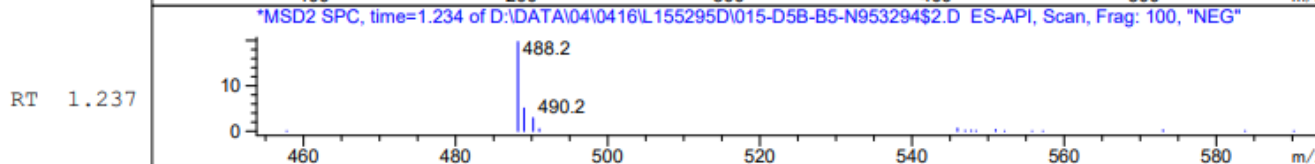

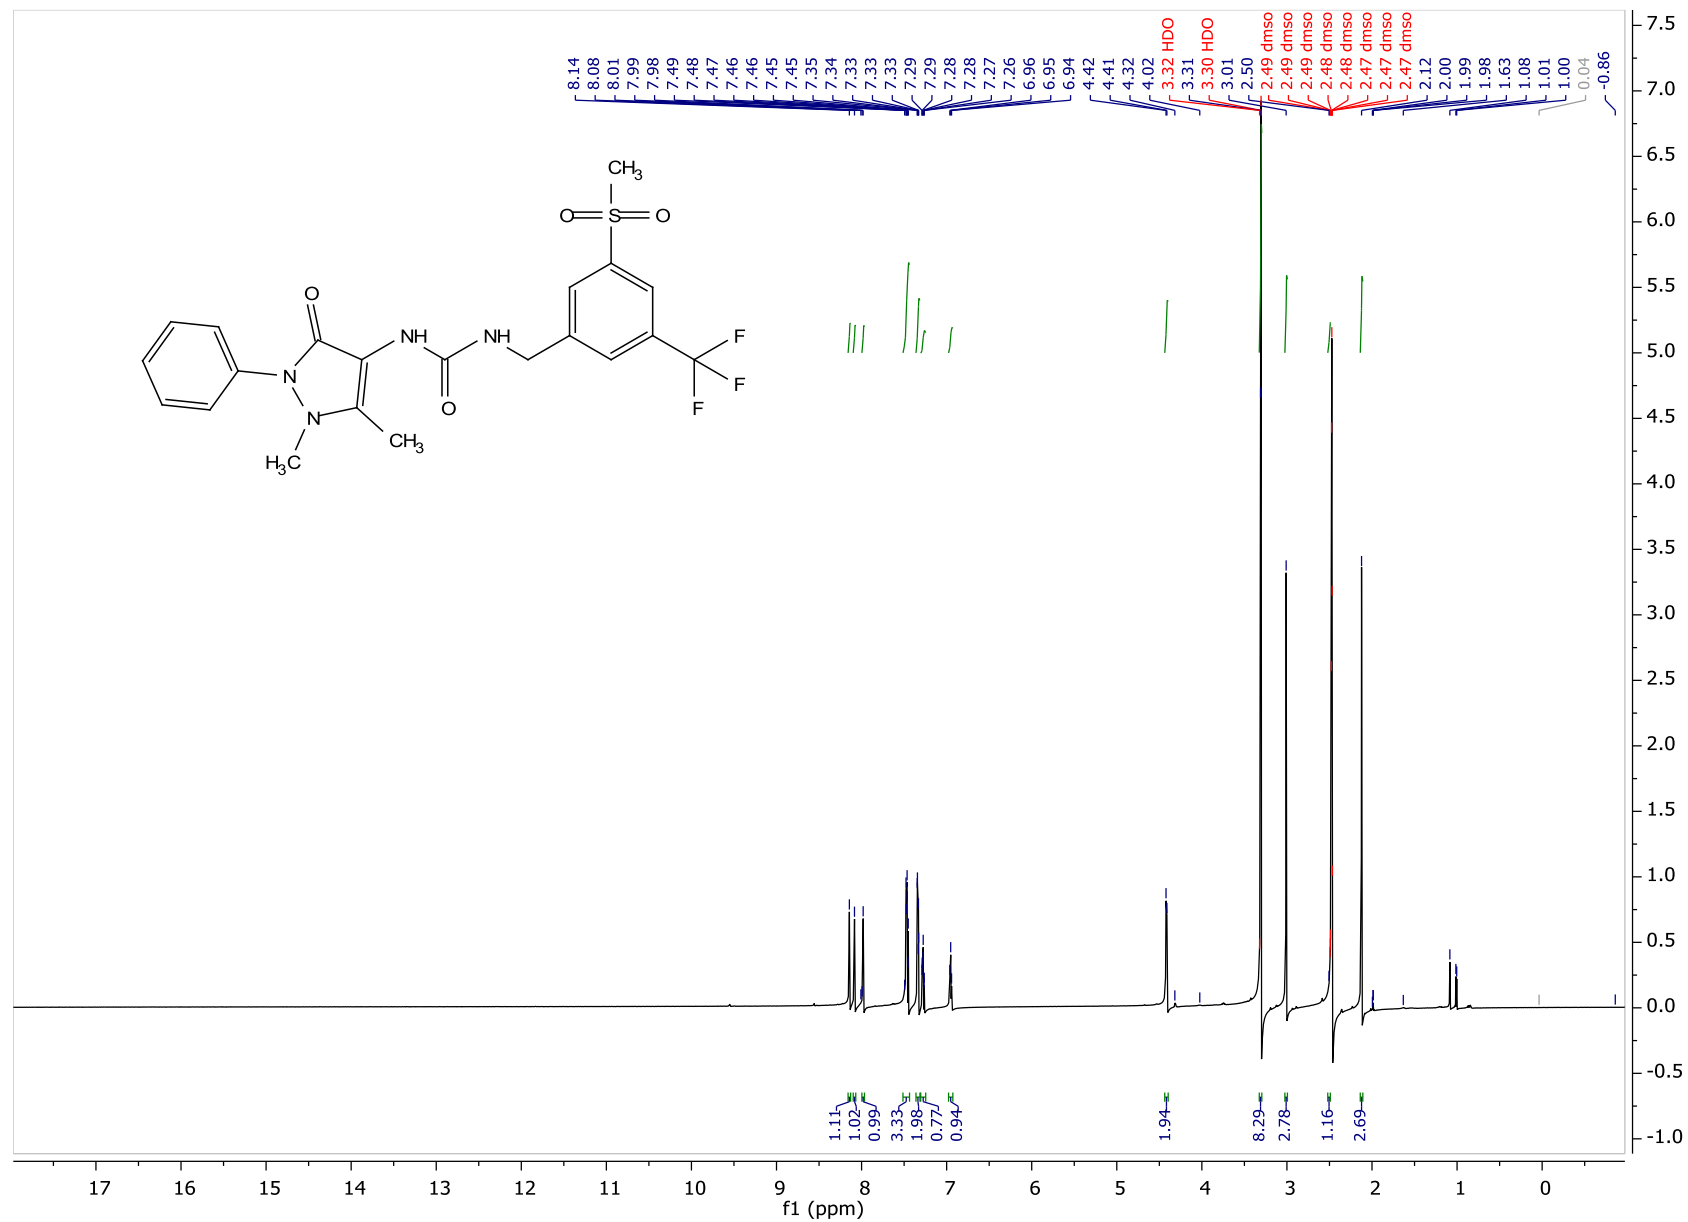

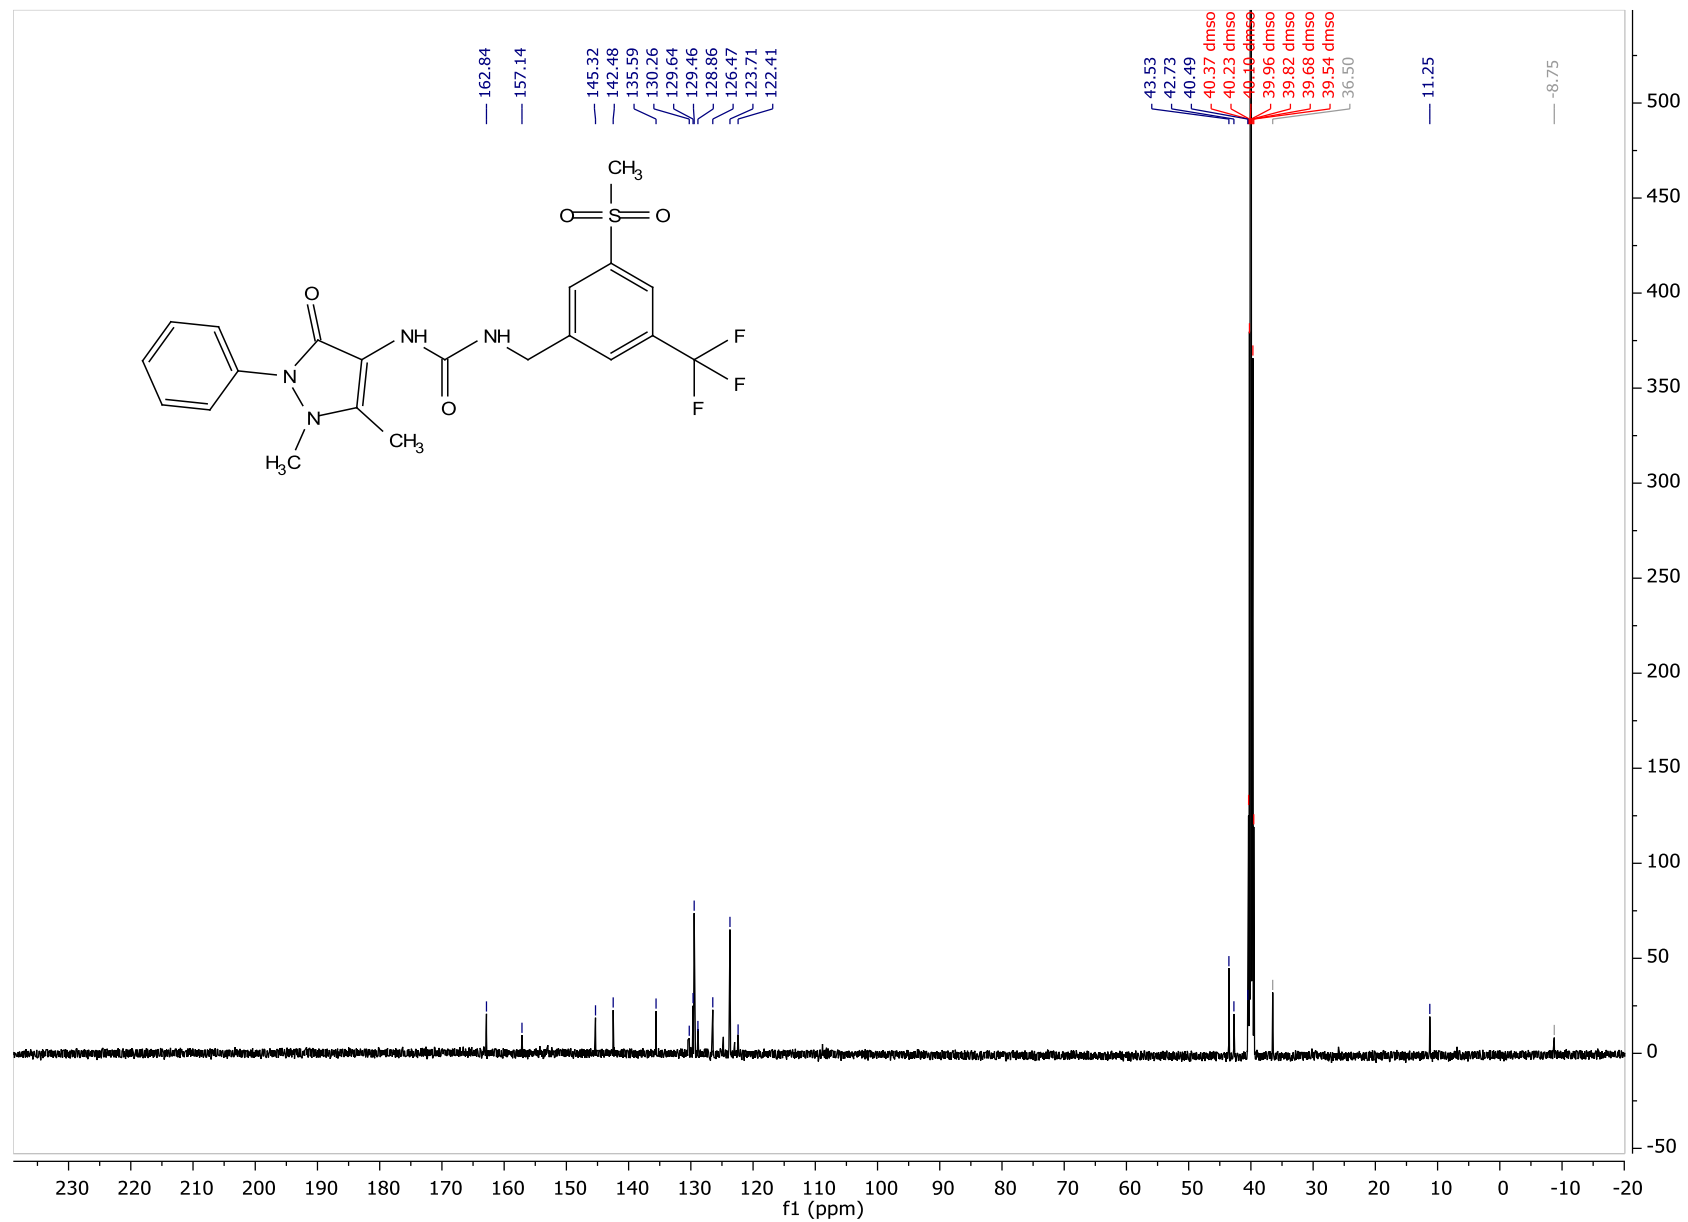

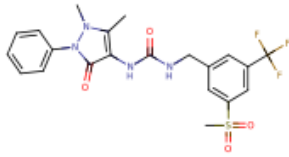

**Mol Wt** 482.48  
**Exact Mass** 482.14

| # | Time  | Area%  |
|---|-------|--------|
| 1 | 1.106 | 100.00 |

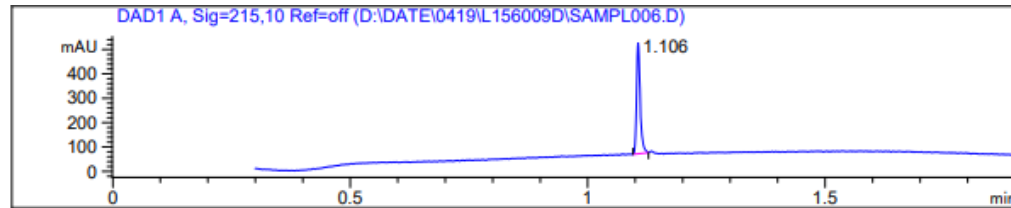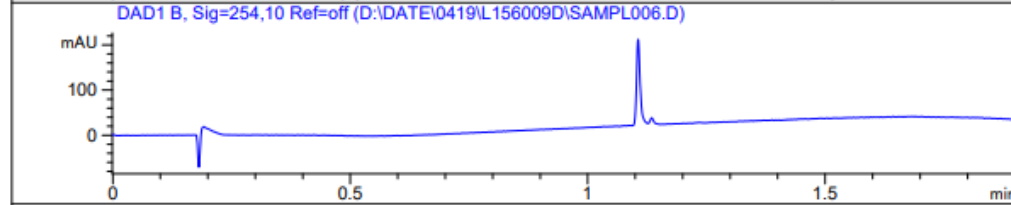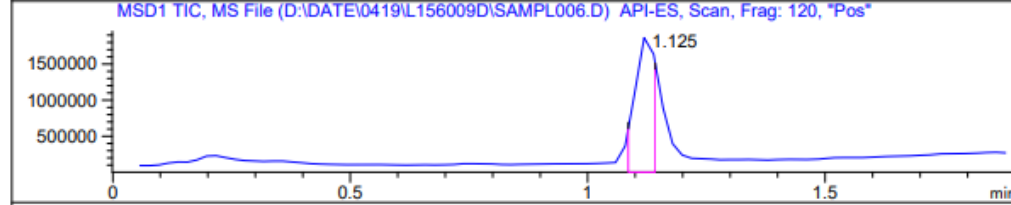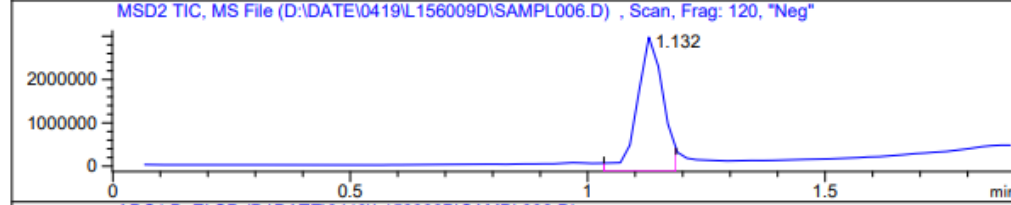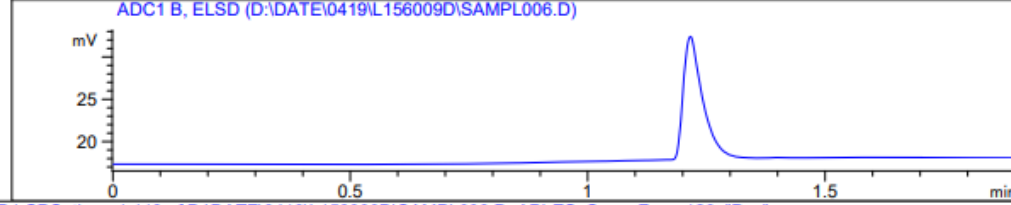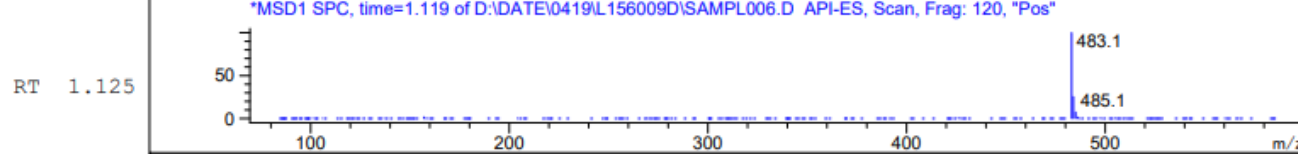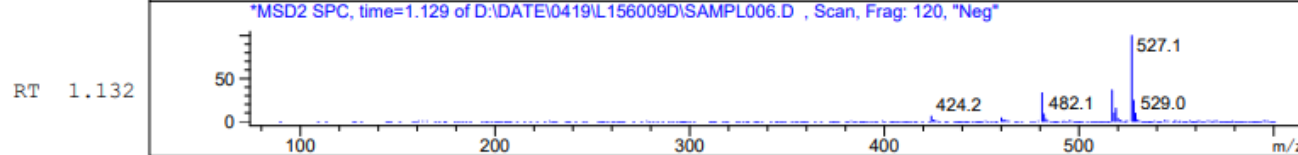

<sup>1</sup>H NMR spectrum of PV-002362019903

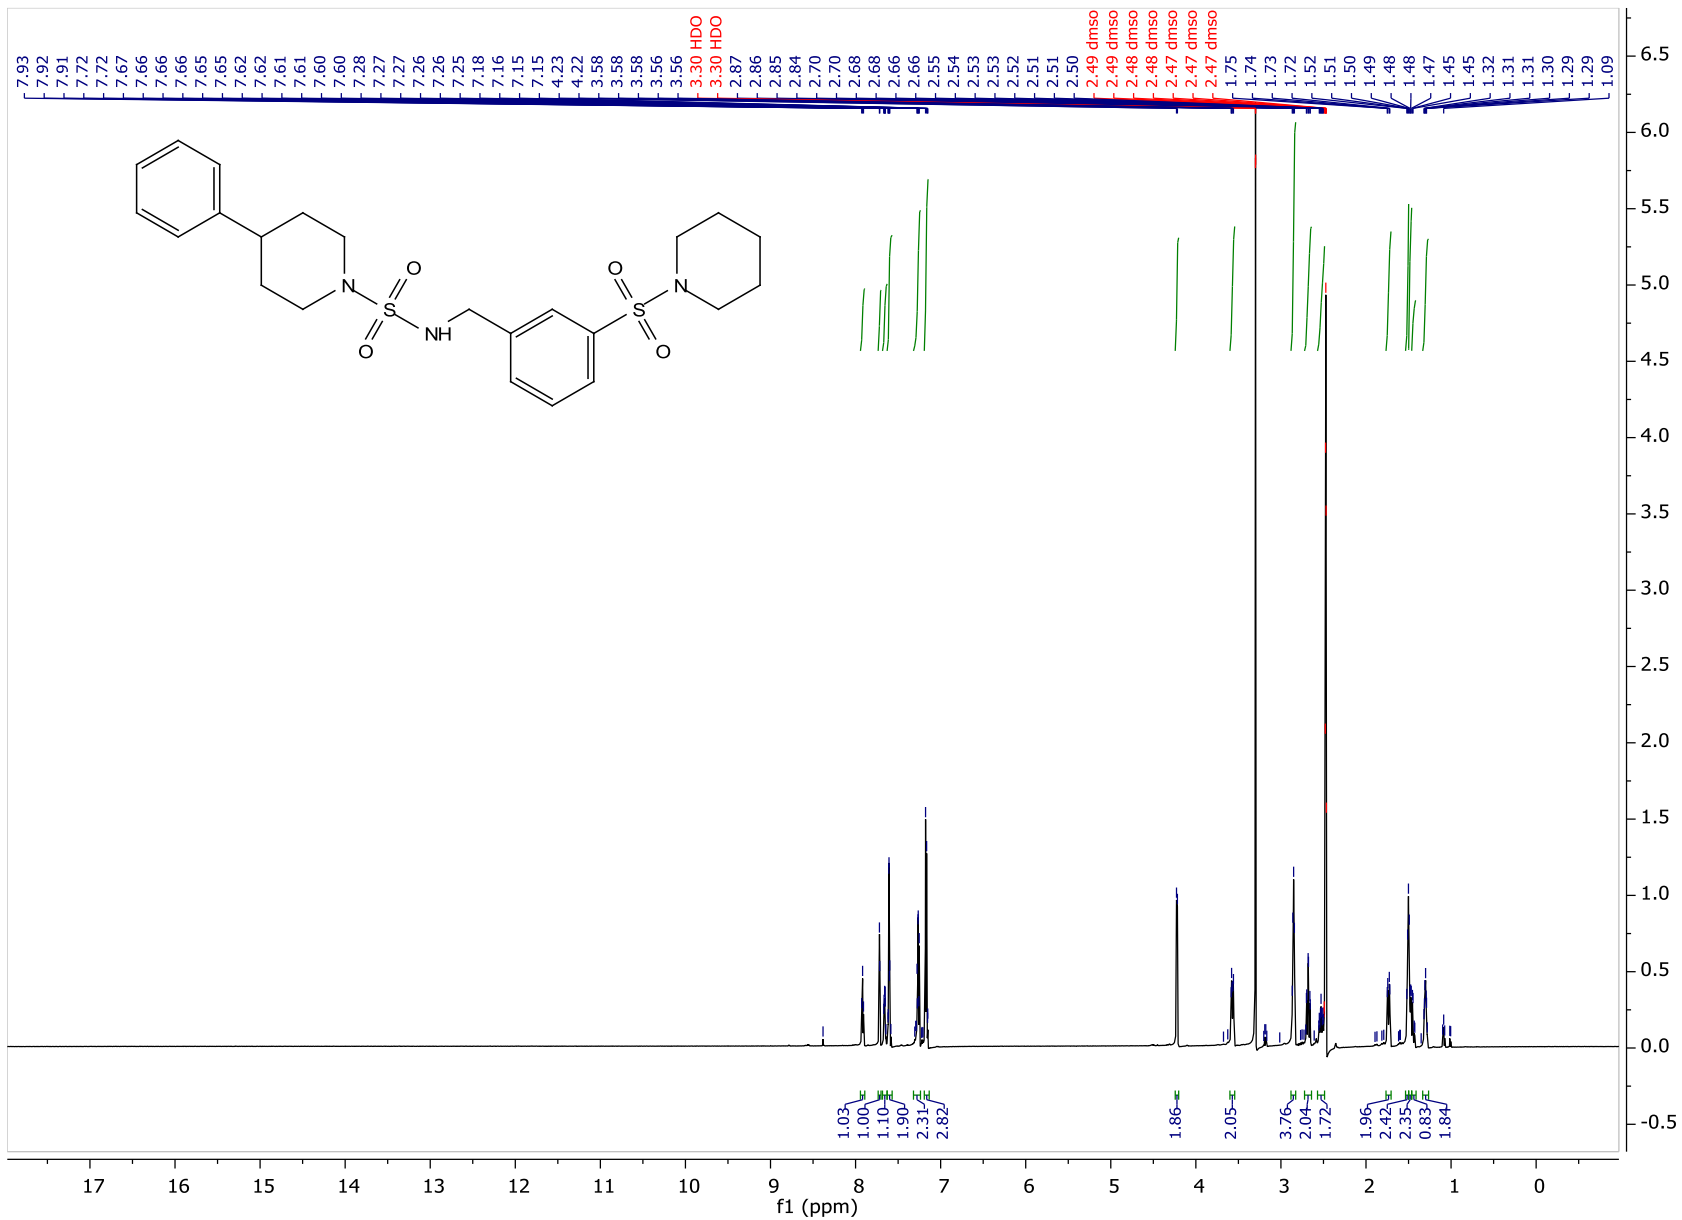



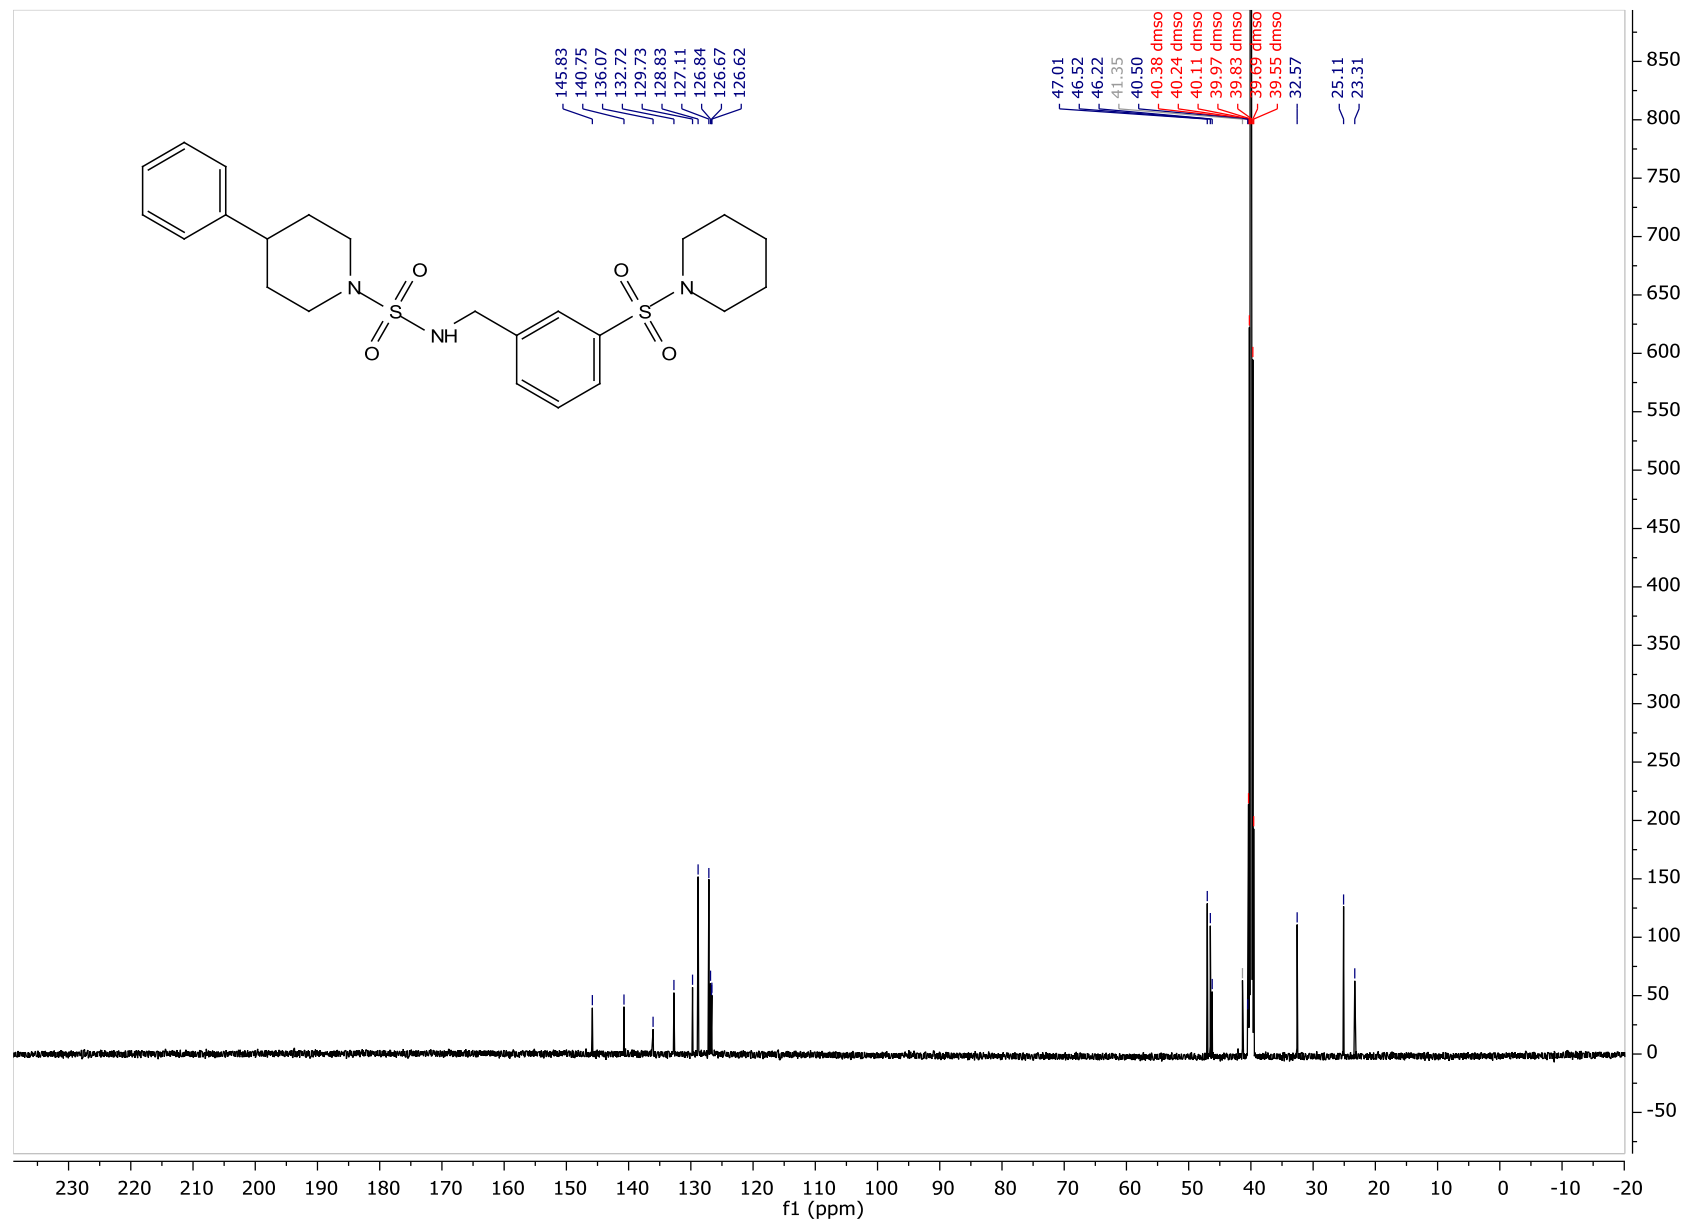

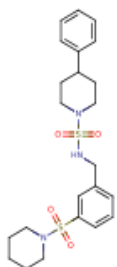

Mol Wt 477.64

Exact Mass 477.21

| # | Time  | Area% |
|---|-------|-------|
| 1 | 1.327 | 5.31  |
| 2 | 1.518 | 94.69 |

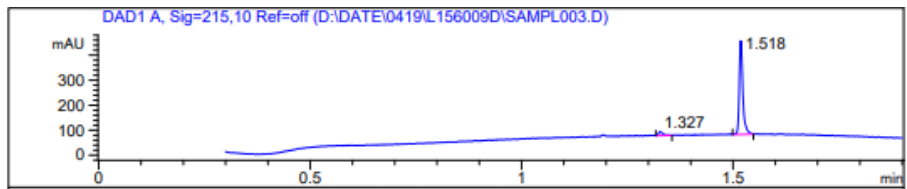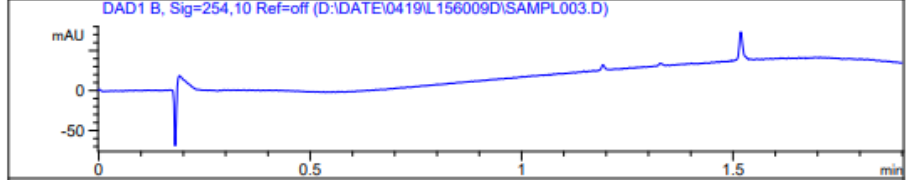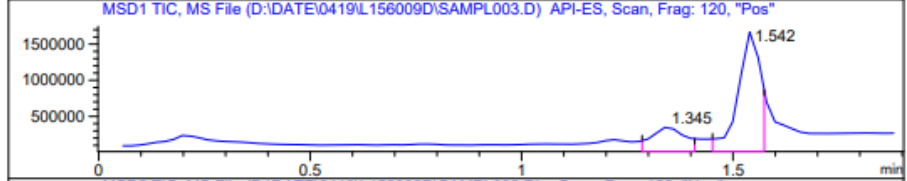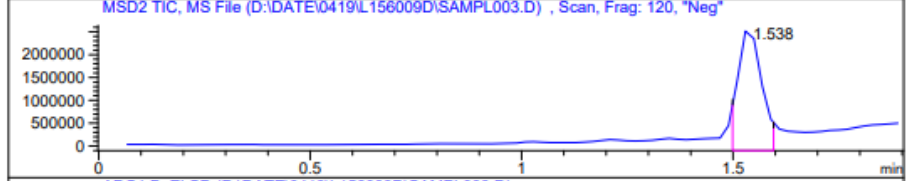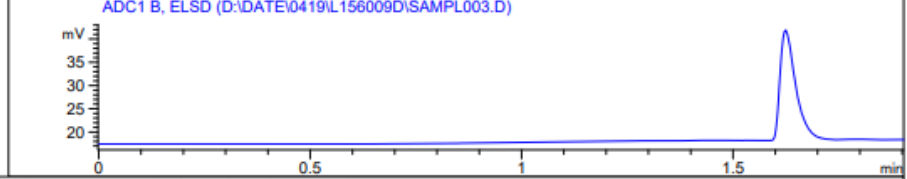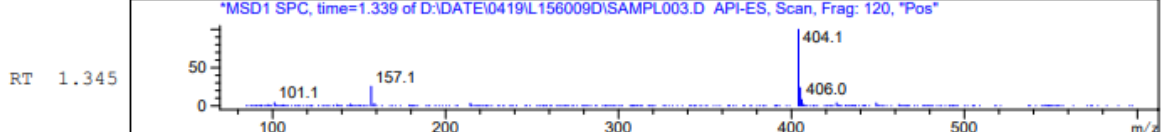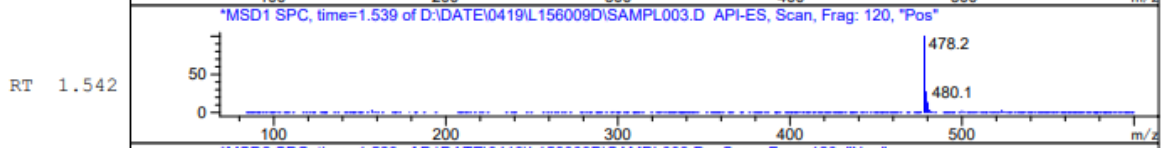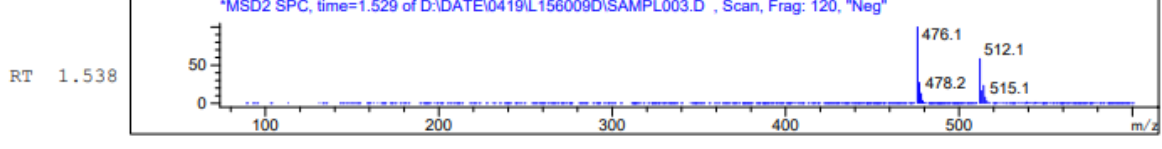

<sup>1</sup>H NMR spectrum of PV-002513928135

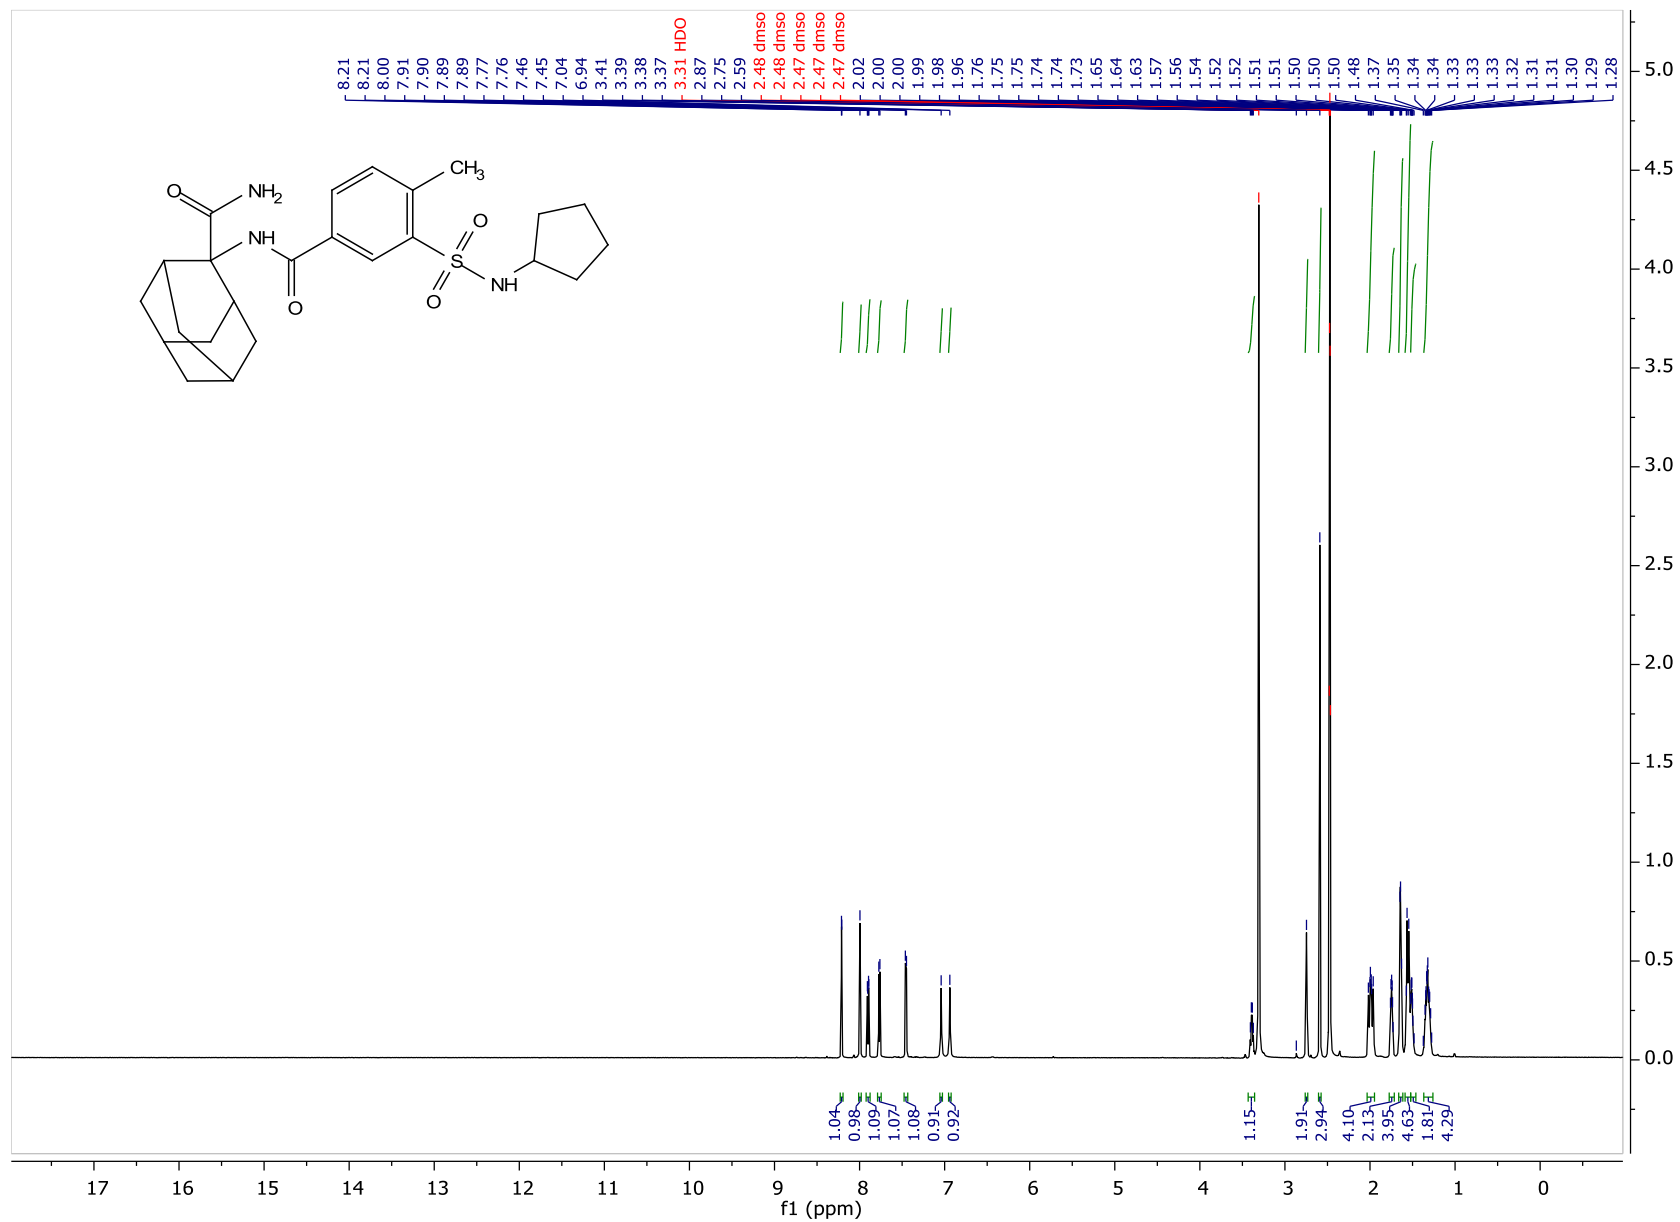

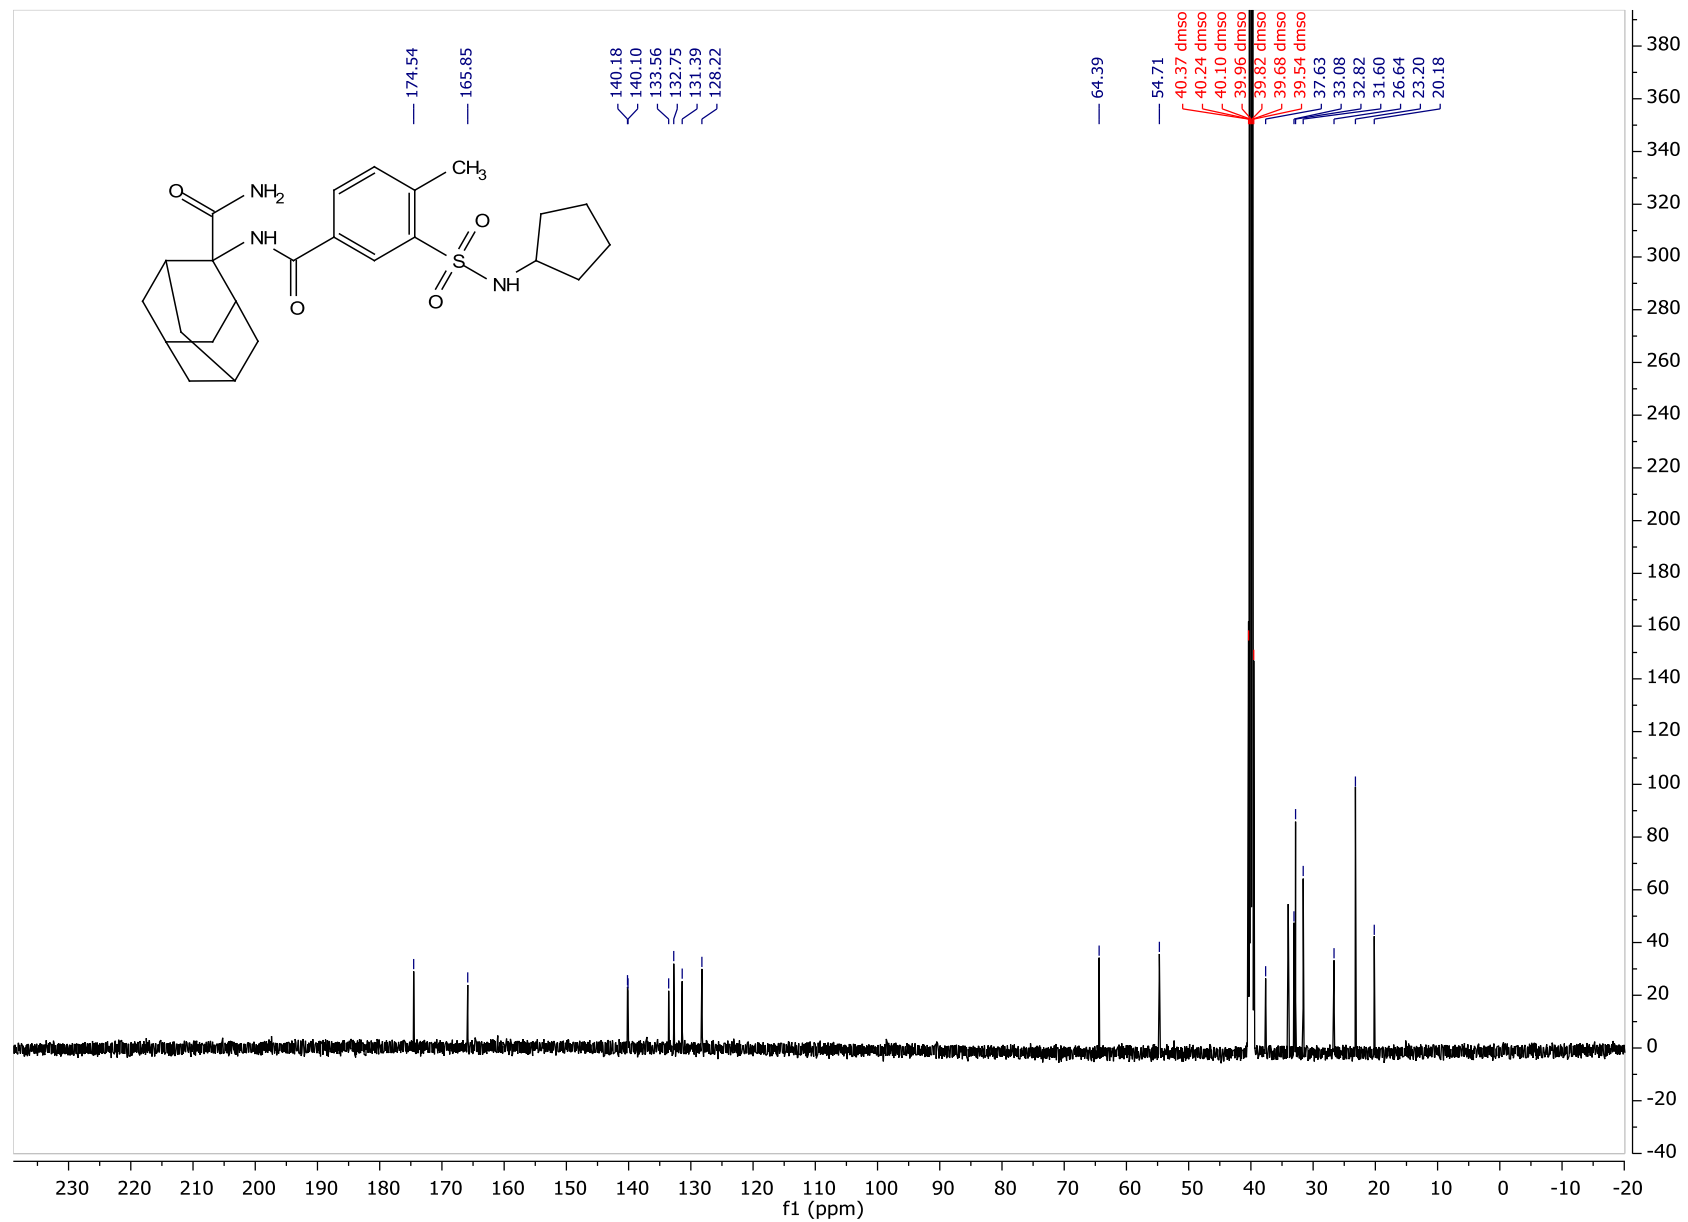

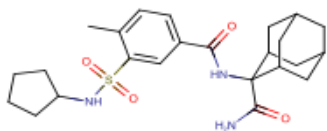

**Mol Wt** 459.6  
**Exact Mass** 459.26

| # | Time  | Area% |
|---|-------|-------|
| 1 | 1.354 | 2.49  |
| 2 | 1.399 | 95.18 |
| 3 | 1.536 | 2.33  |

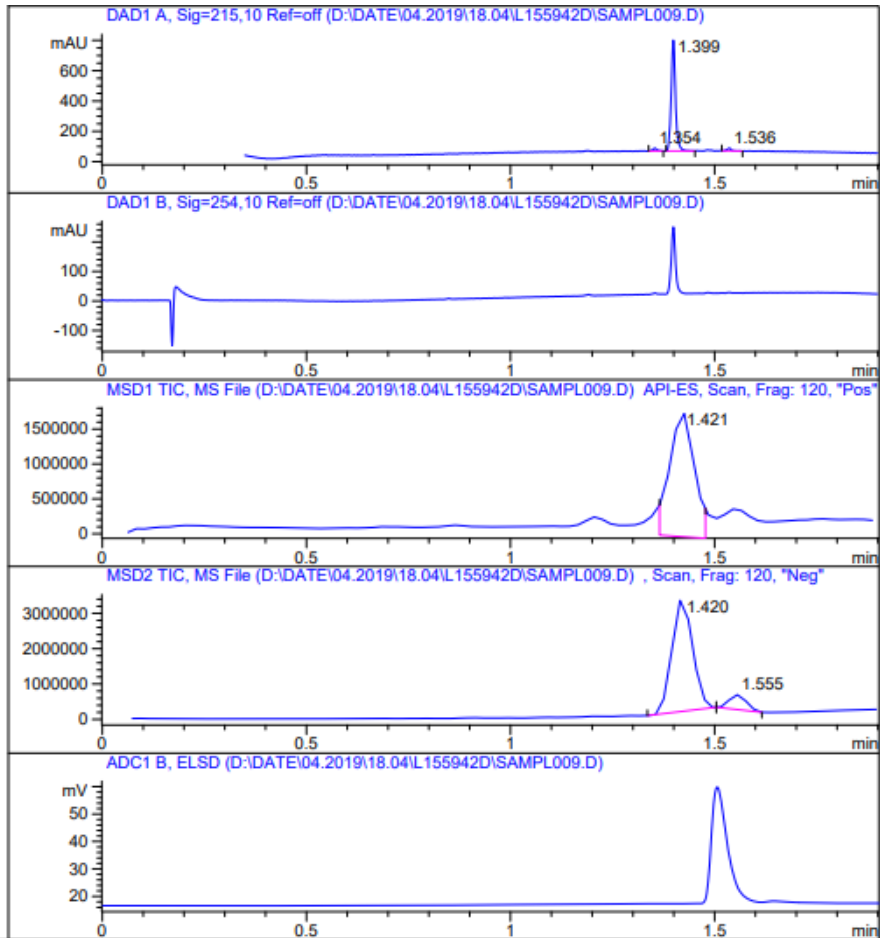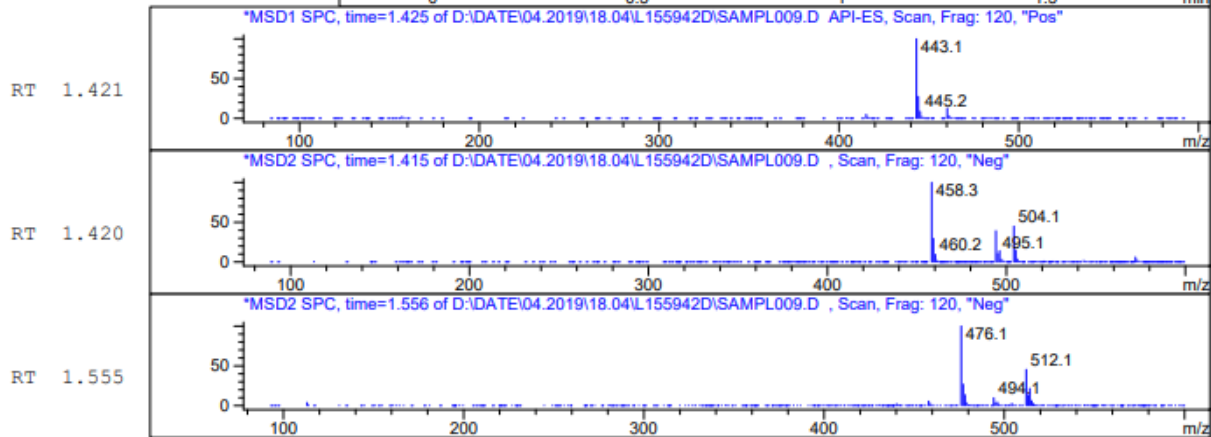

<sup>1</sup>H NMR spectrum of PV-002590000161

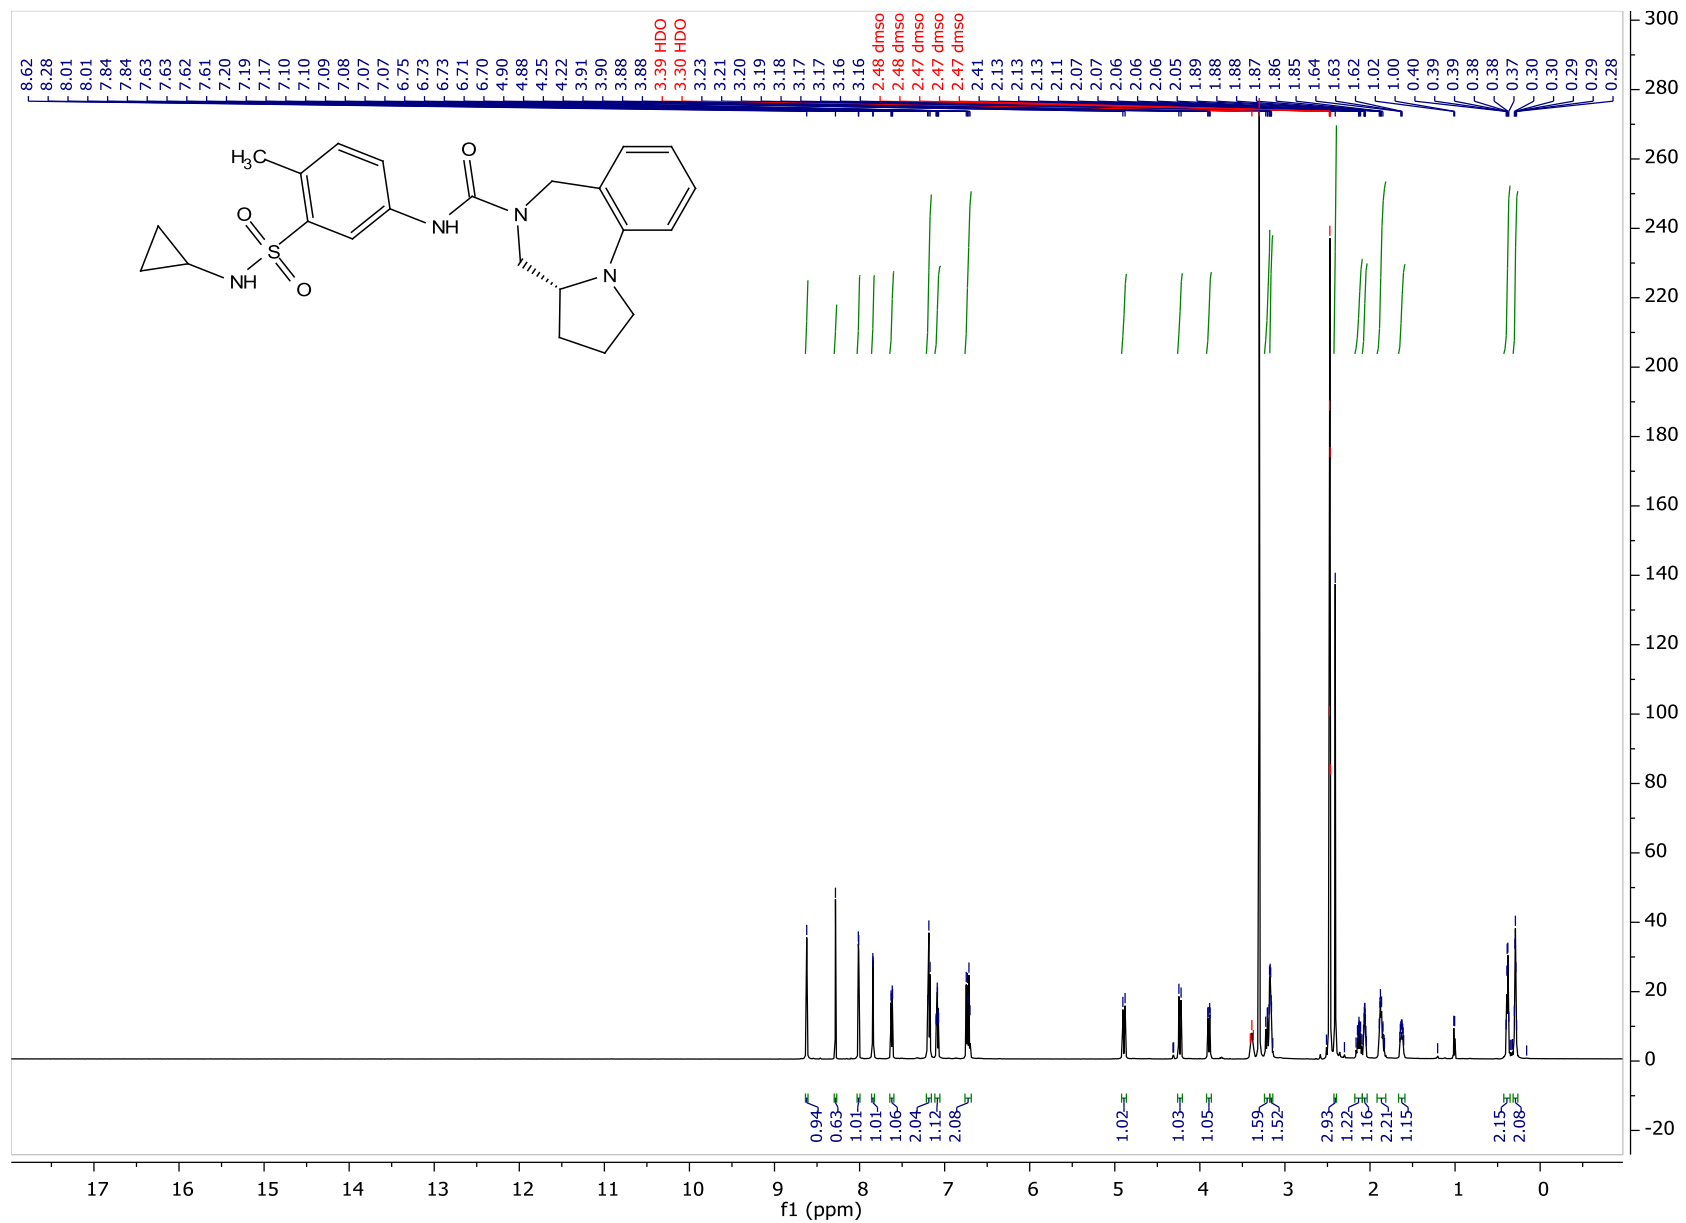

<sup>13</sup>C NMR spectrum of PV-002590000161

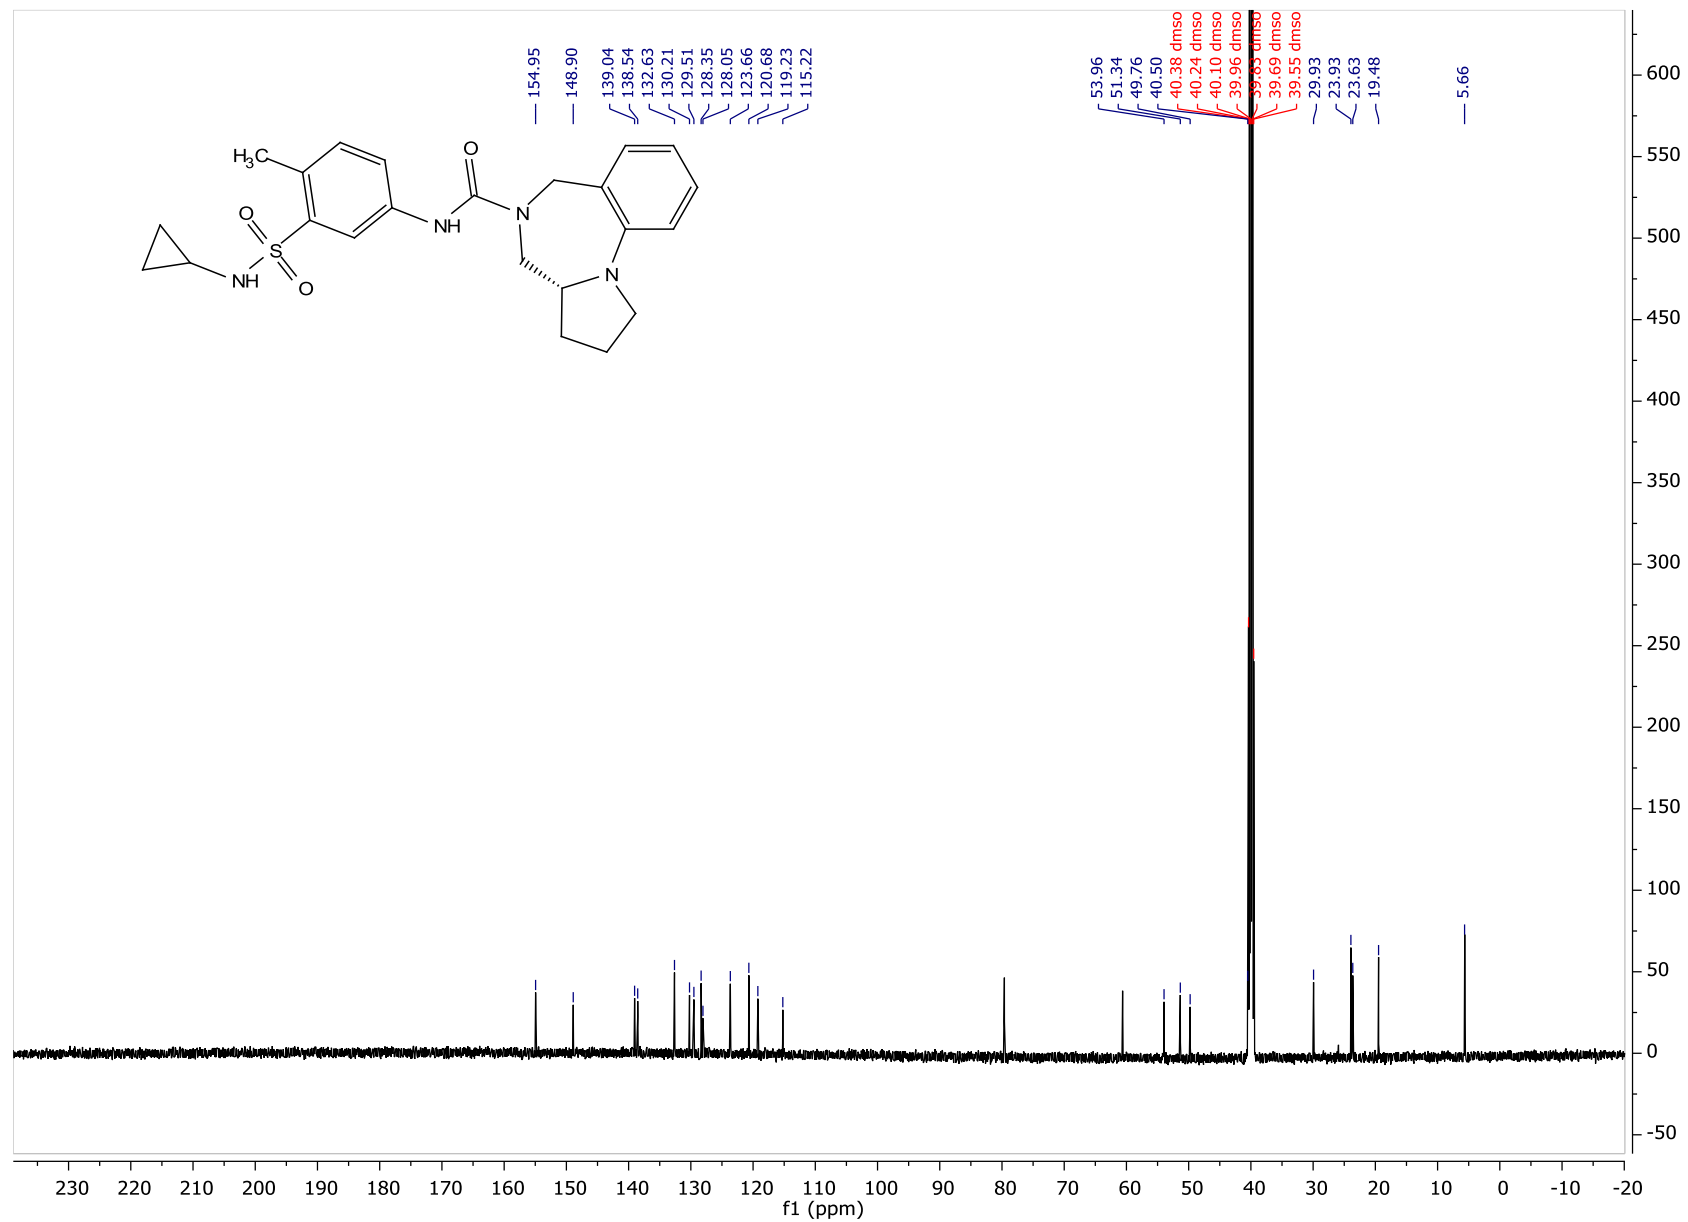

Ret\_Time: 1.283 min

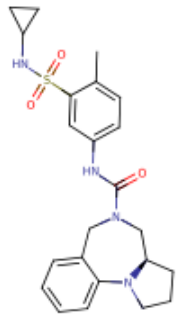

Mol Wt 440.56

Exact Mass 440.22

| # | Time  | Area%  |
|---|-------|--------|
| 1 | 1.283 | 100.00 |

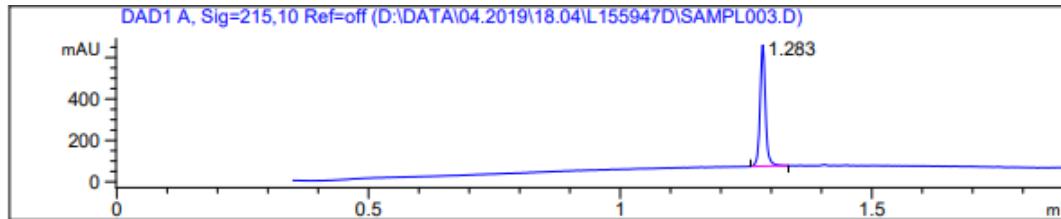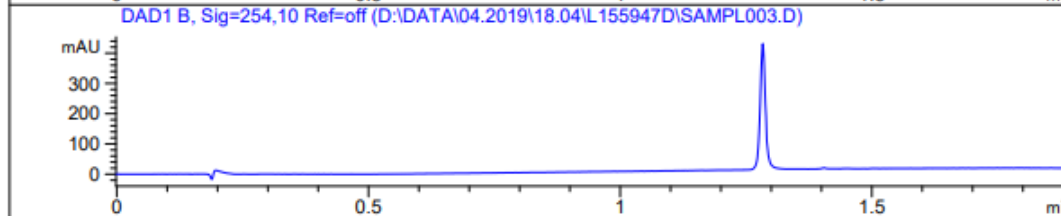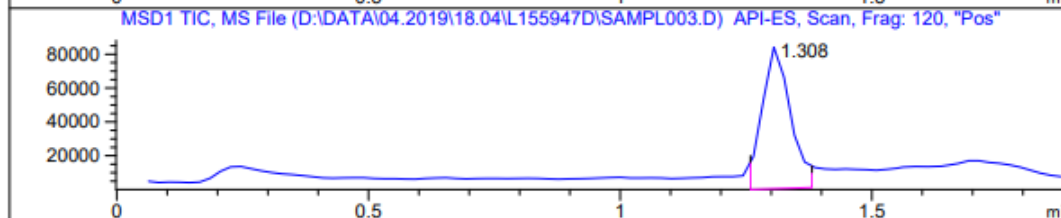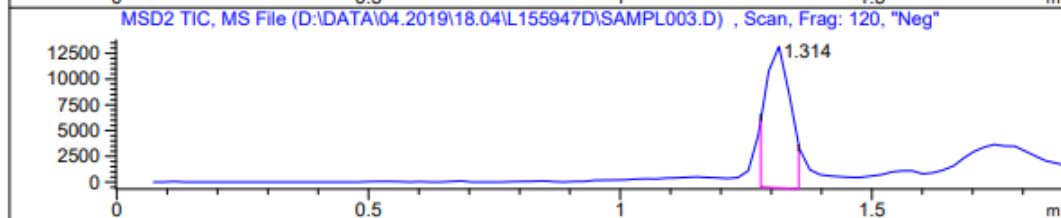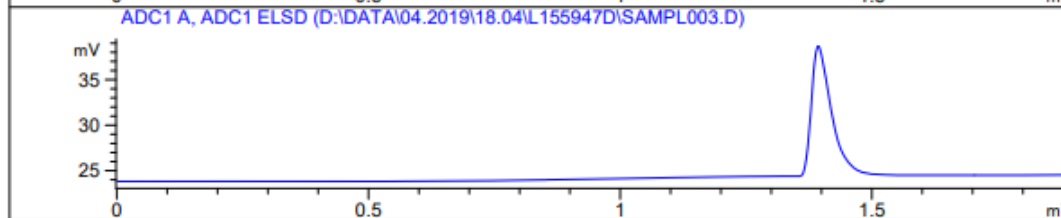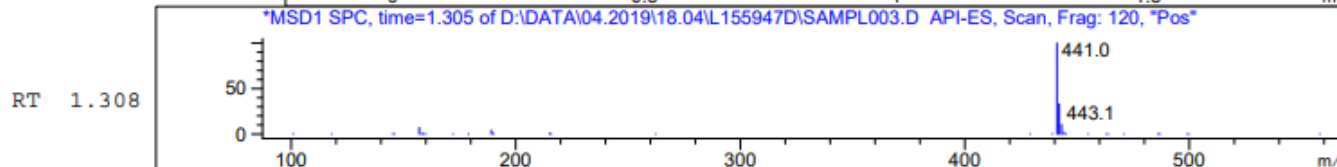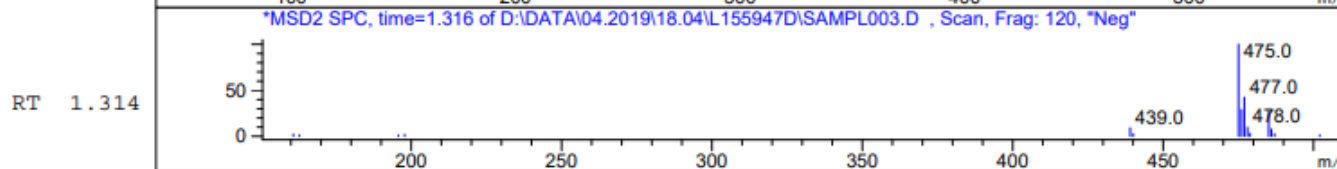



<sup>1</sup>H NMR spectrum of PV-002596373138

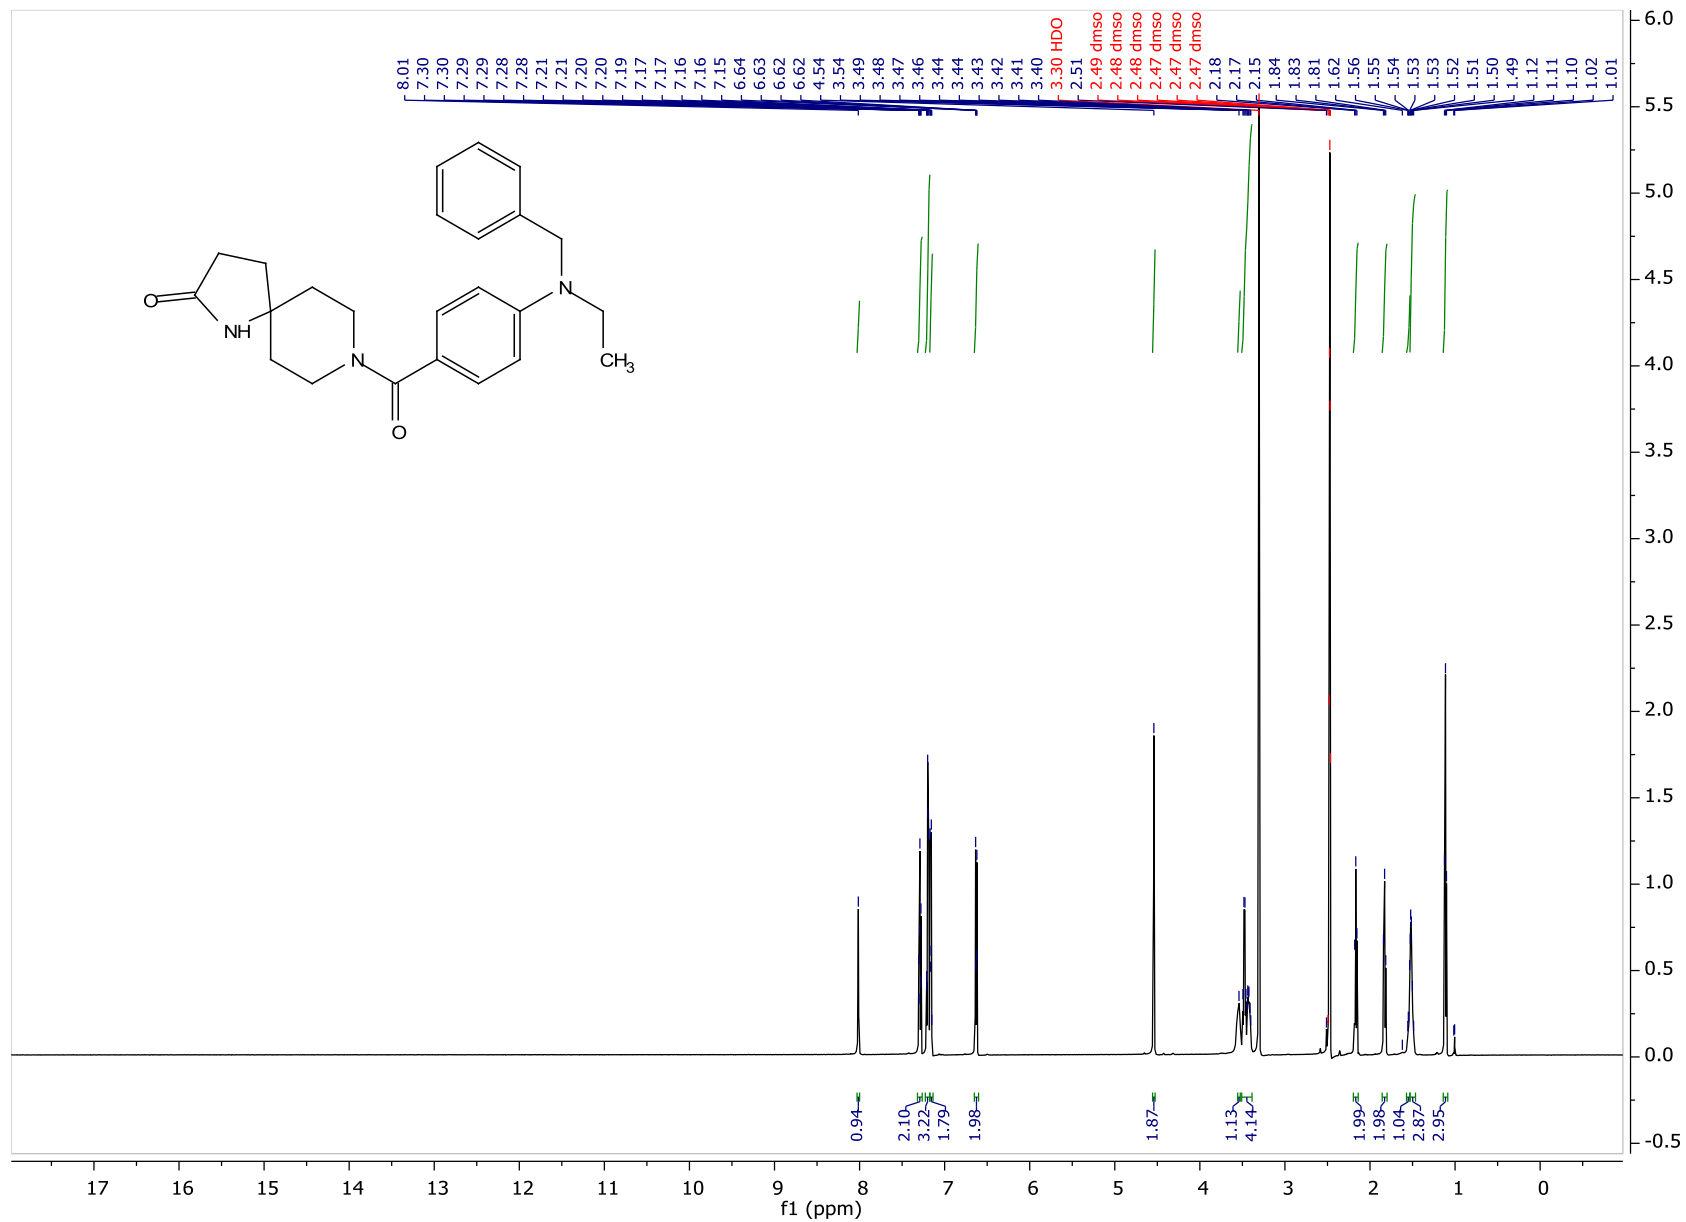

<sup>13</sup>C NMR spectrum of PV-002596373138

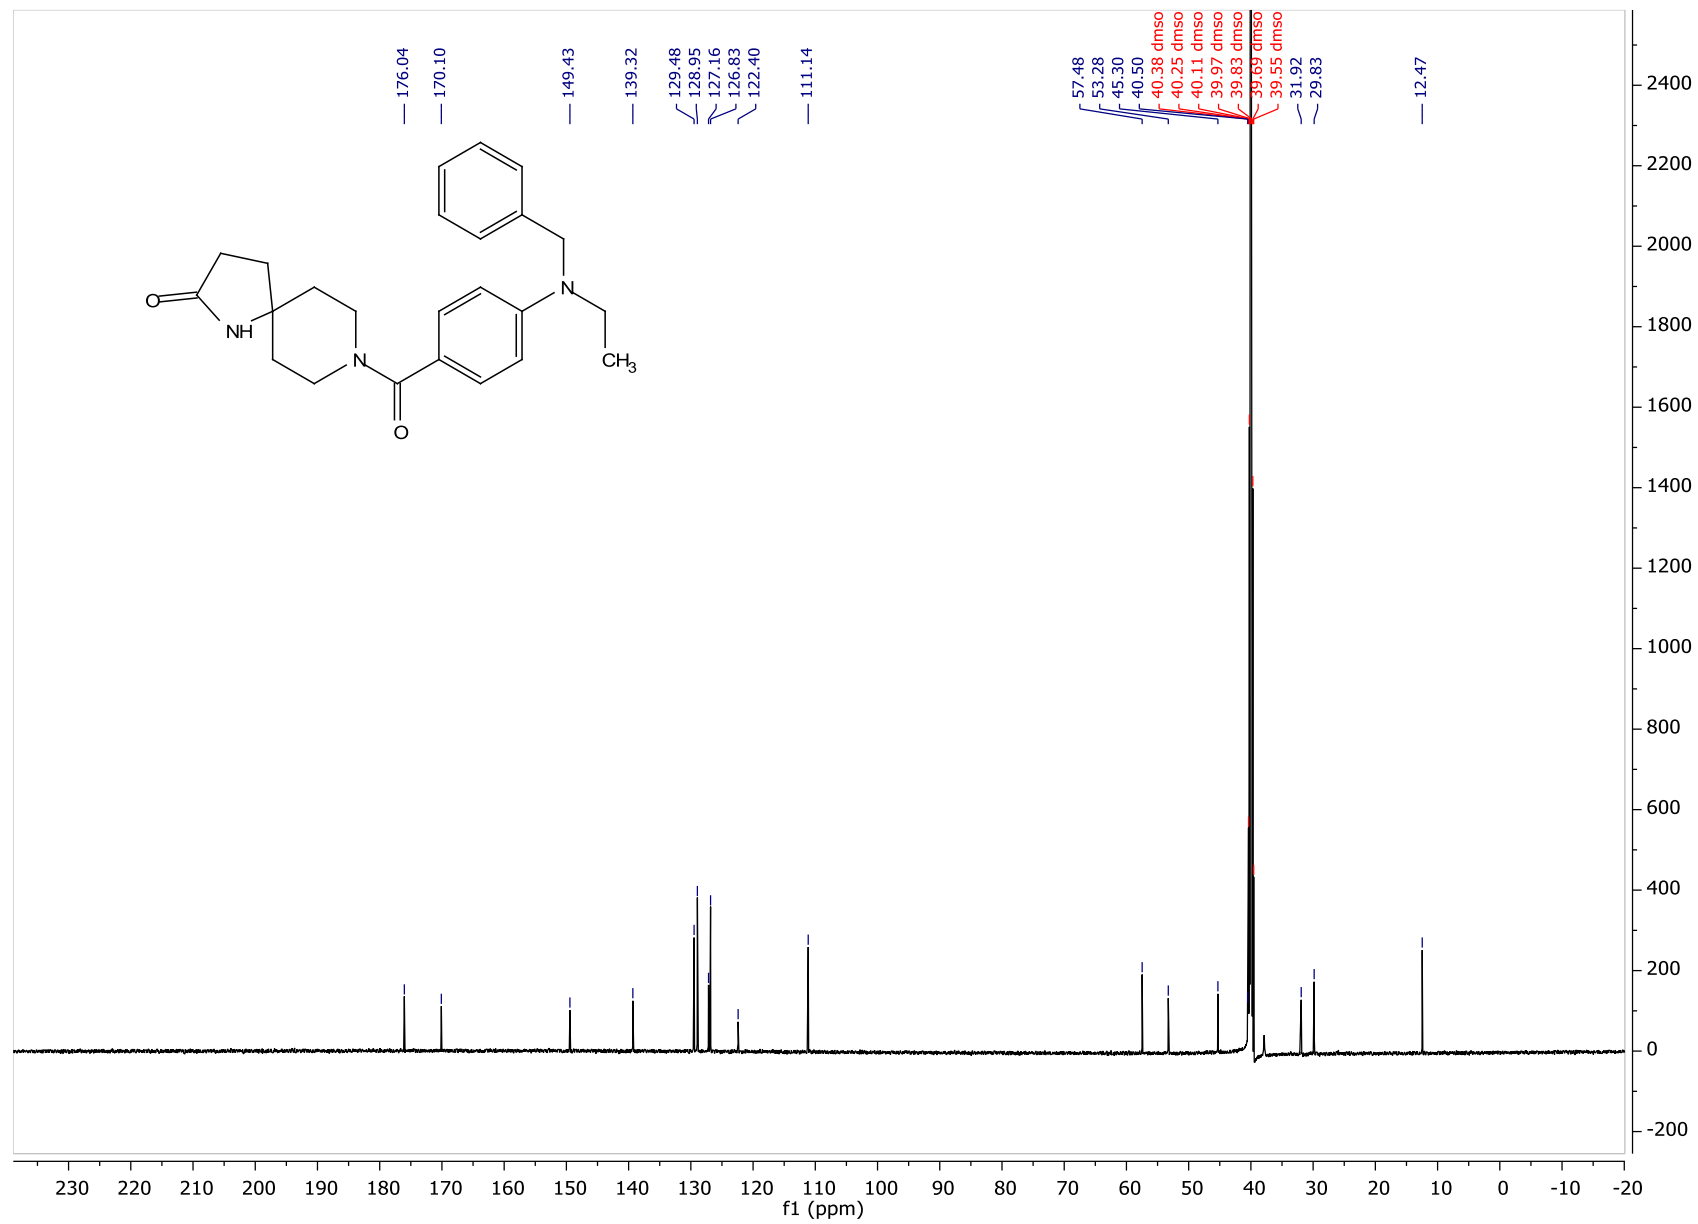

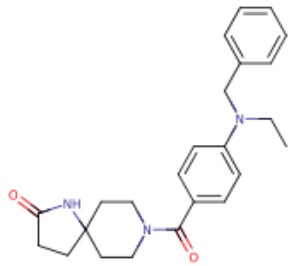

**Mol Wt** 391.51  
**Exact Mass** 391.27

| # | Time  | Area%  |
|---|-------|--------|
| 1 | 1.315 | 100.00 |

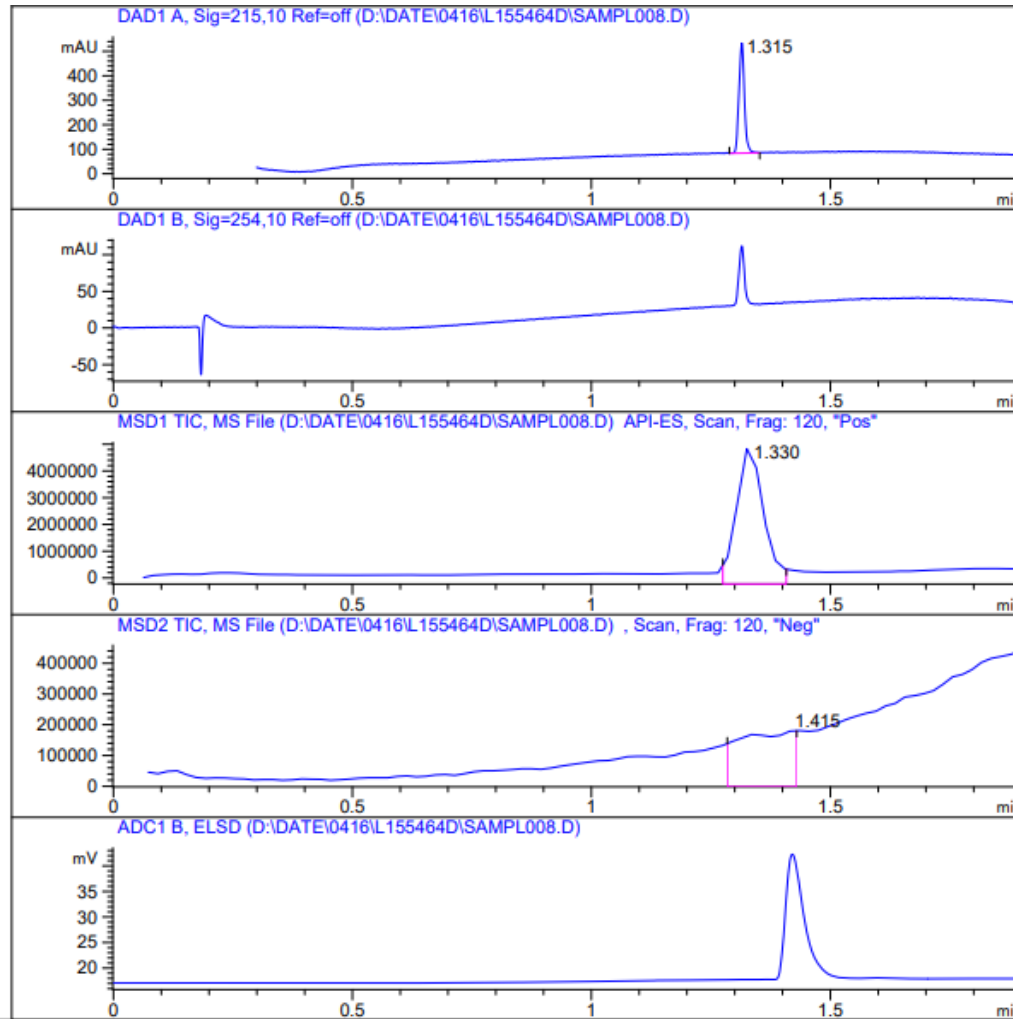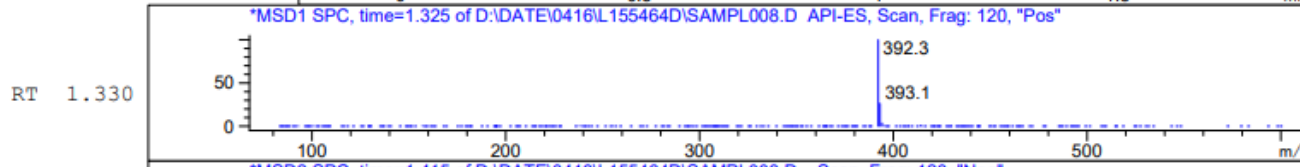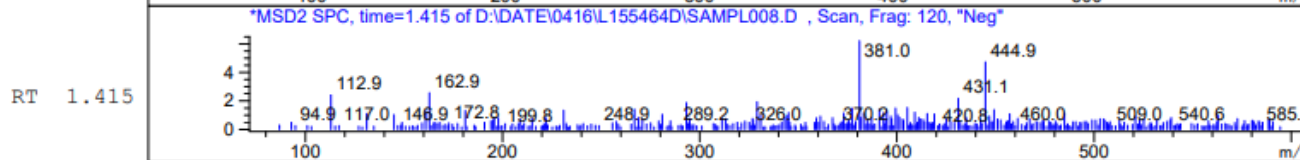

<sup>1</sup>H NMR spectrum of Z1200683193

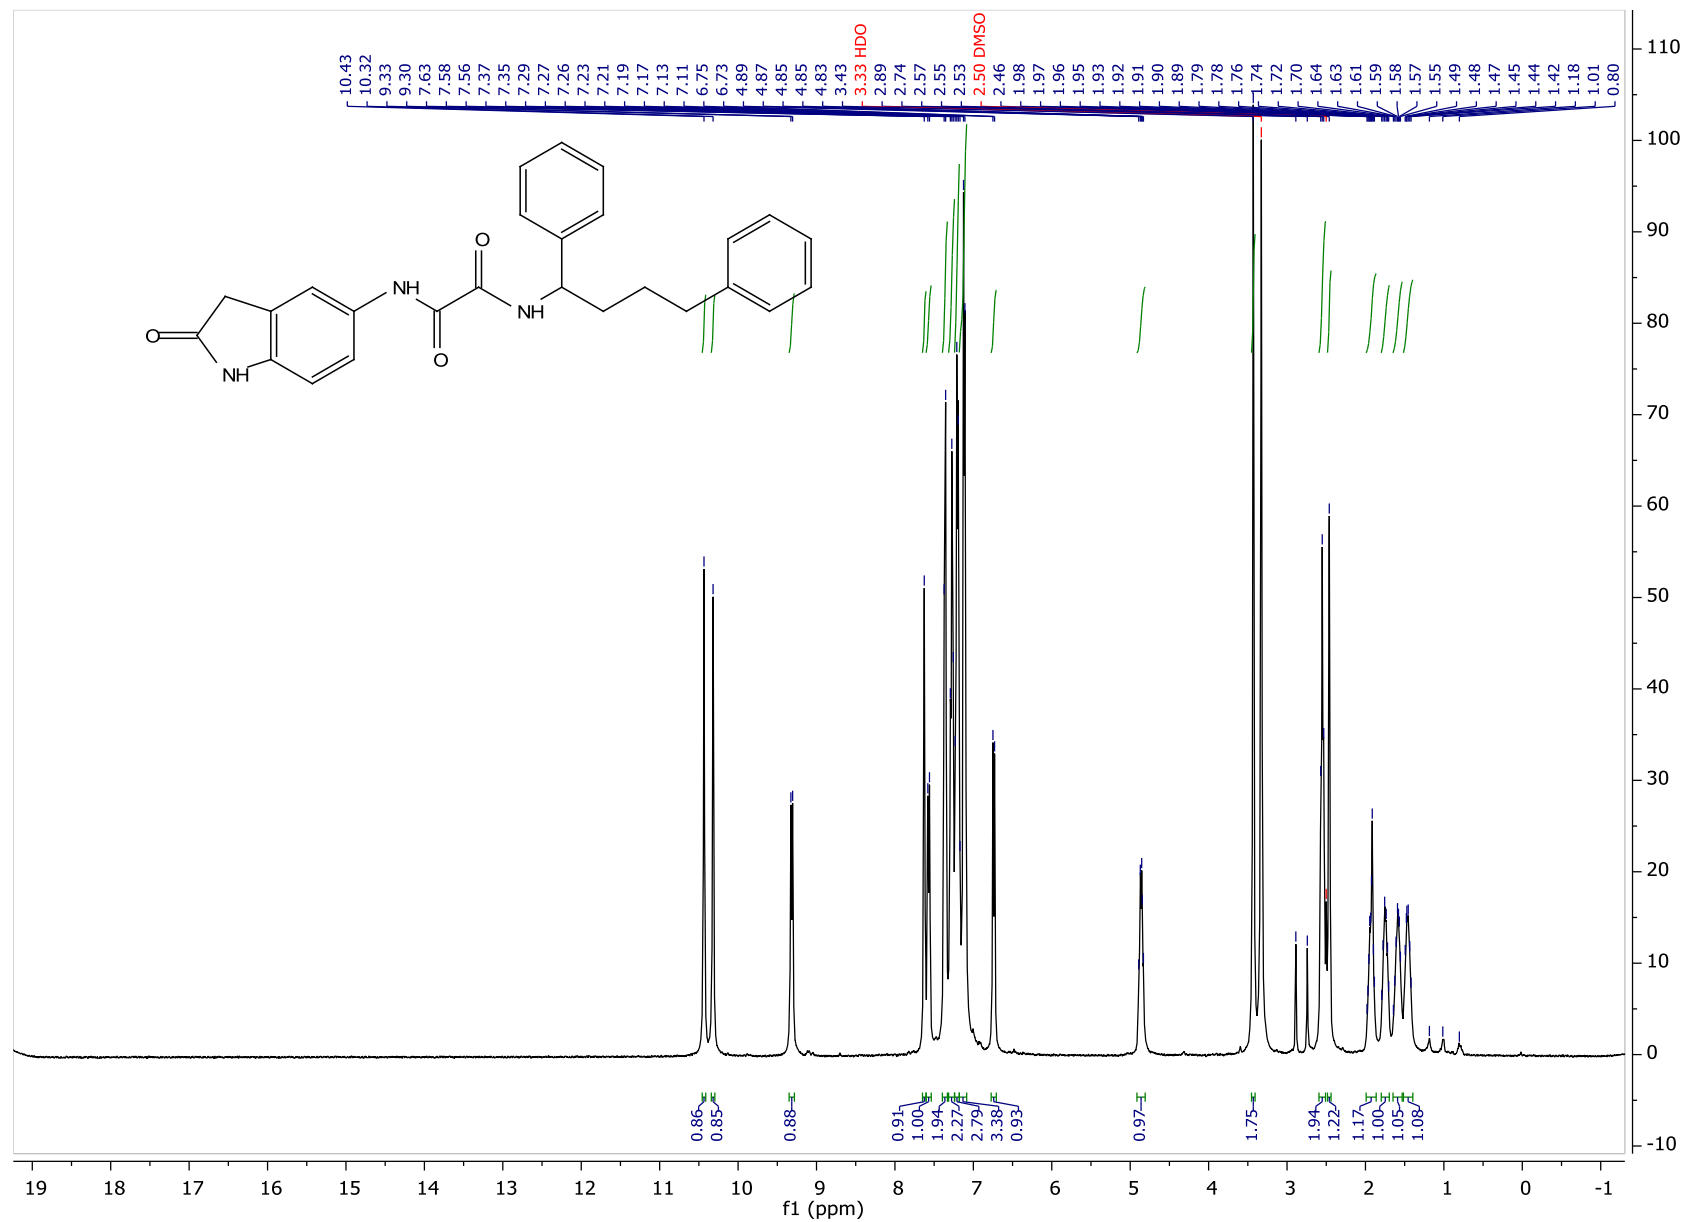

<sup>13</sup>C NMR spectrum of Z1200683193

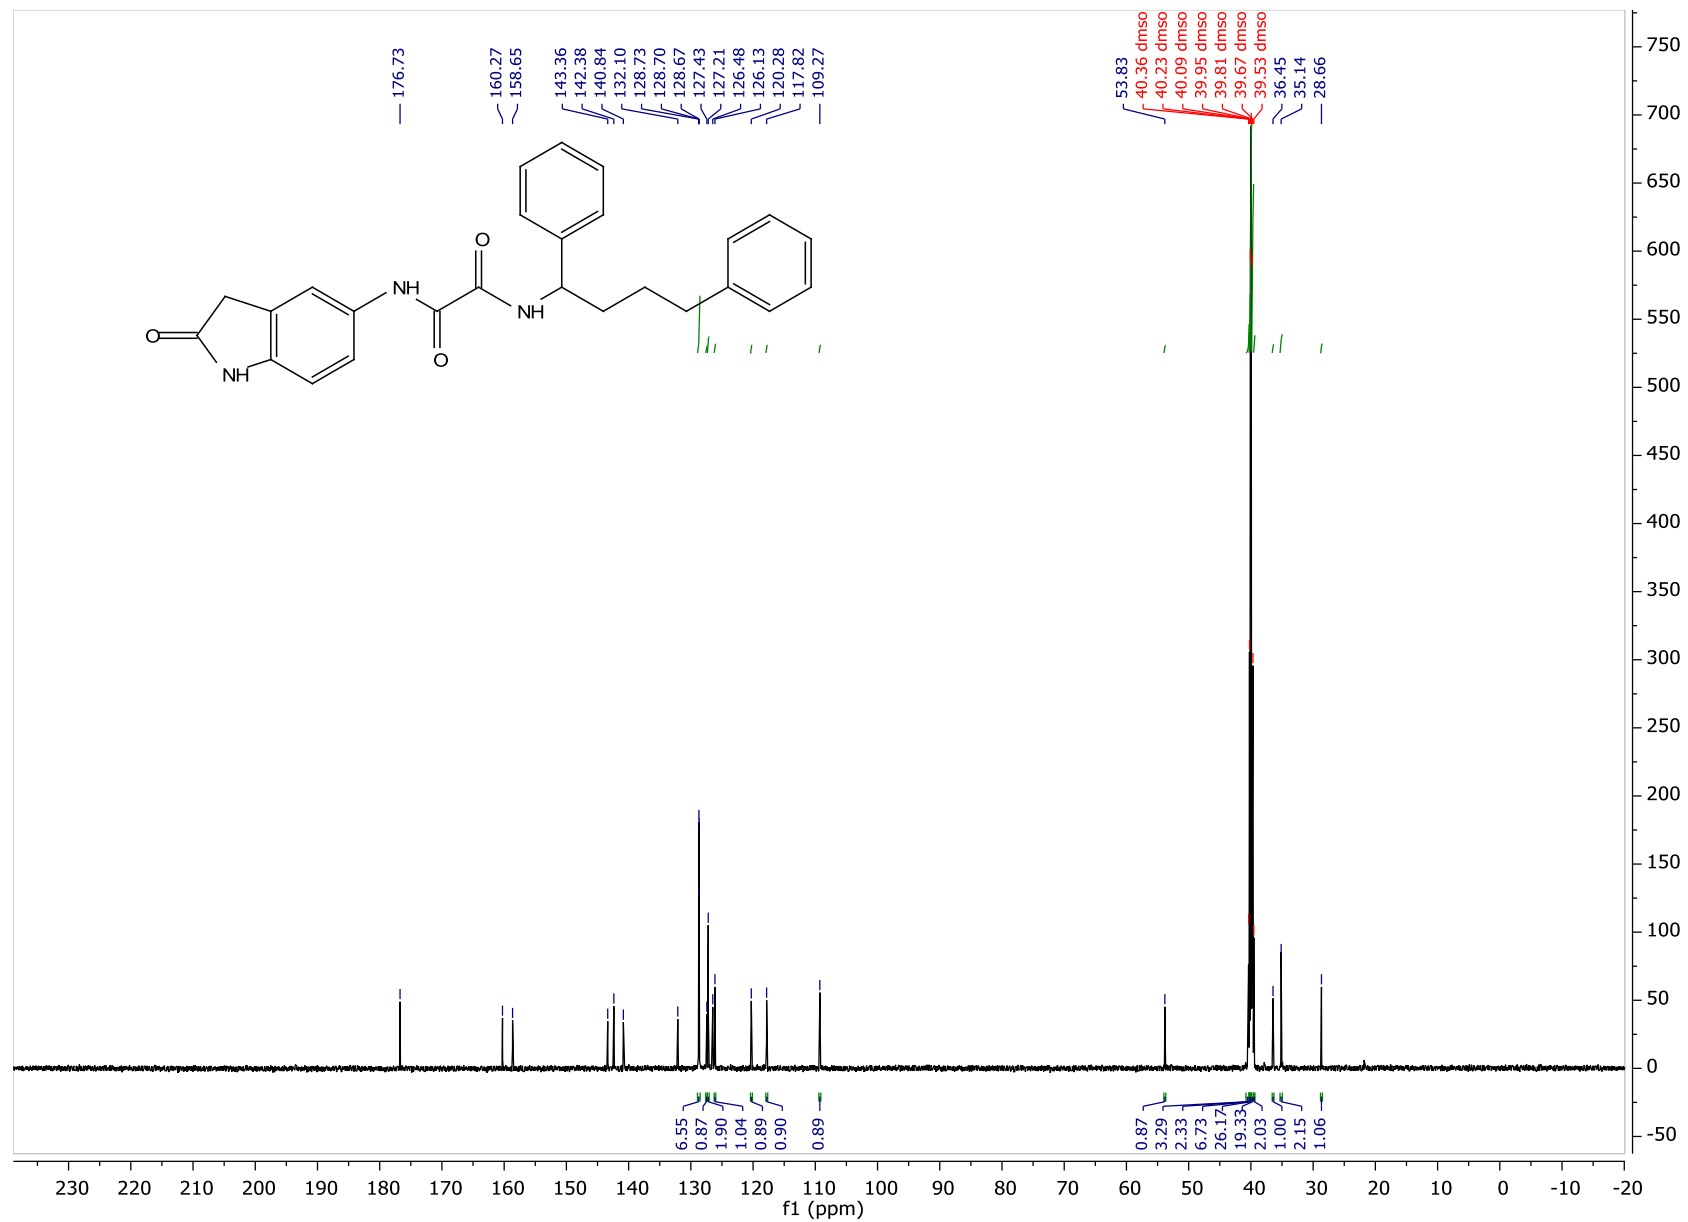

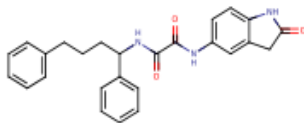

**Mol Wt** 427.5  
**Exact Mass** 427.22

| # | Time  | Area%  |
|---|-------|--------|
| 1 | 1.502 | 100.00 |

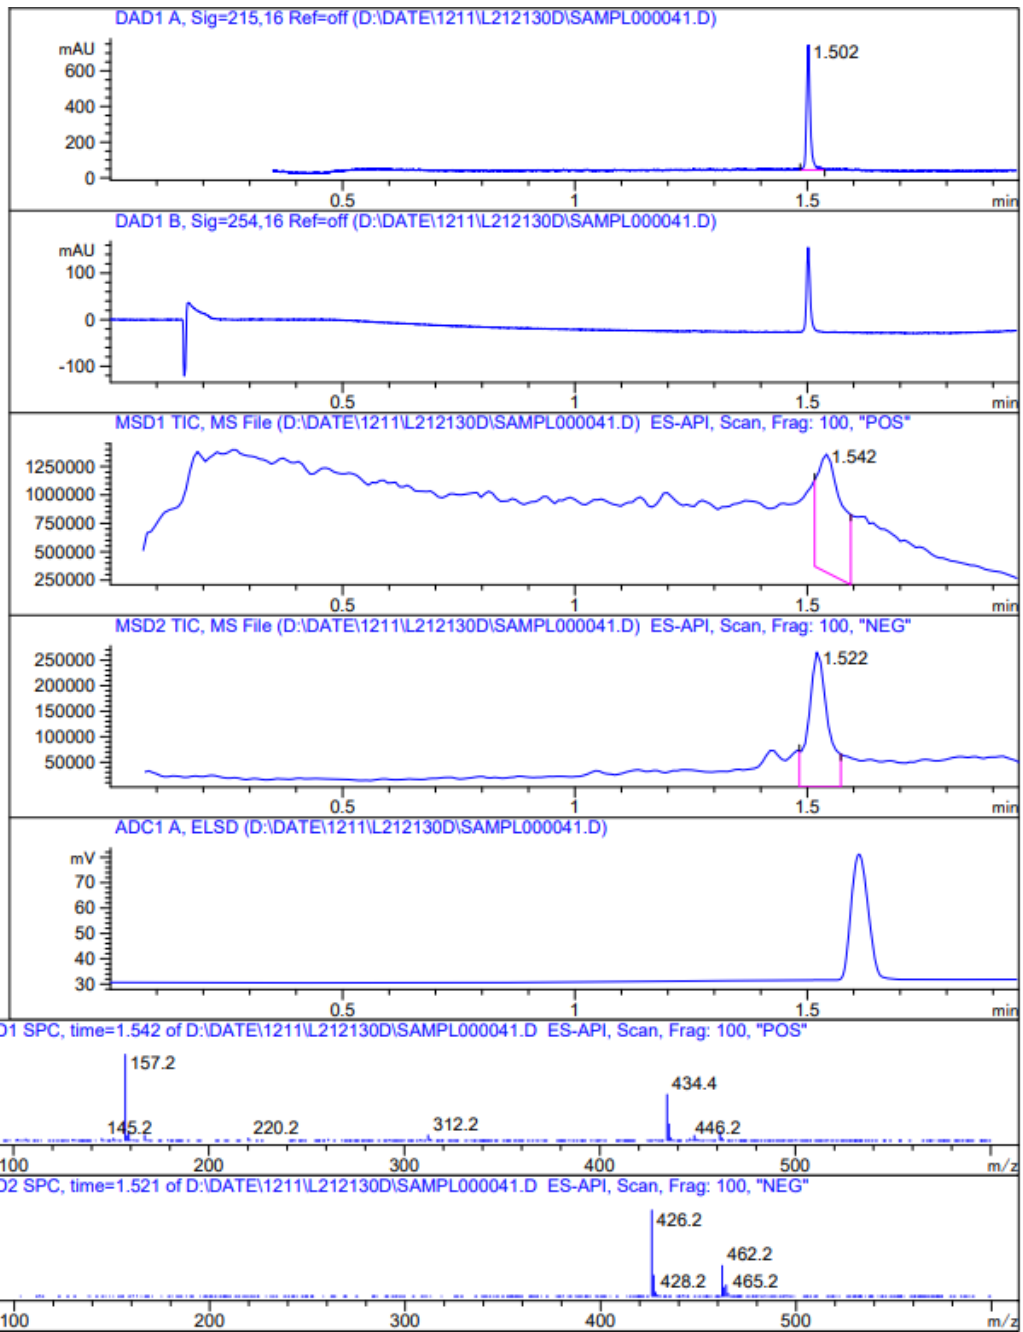

RT 1.542

RT 1.522

<sup>1</sup>H NMR spectrum of Z1270981281

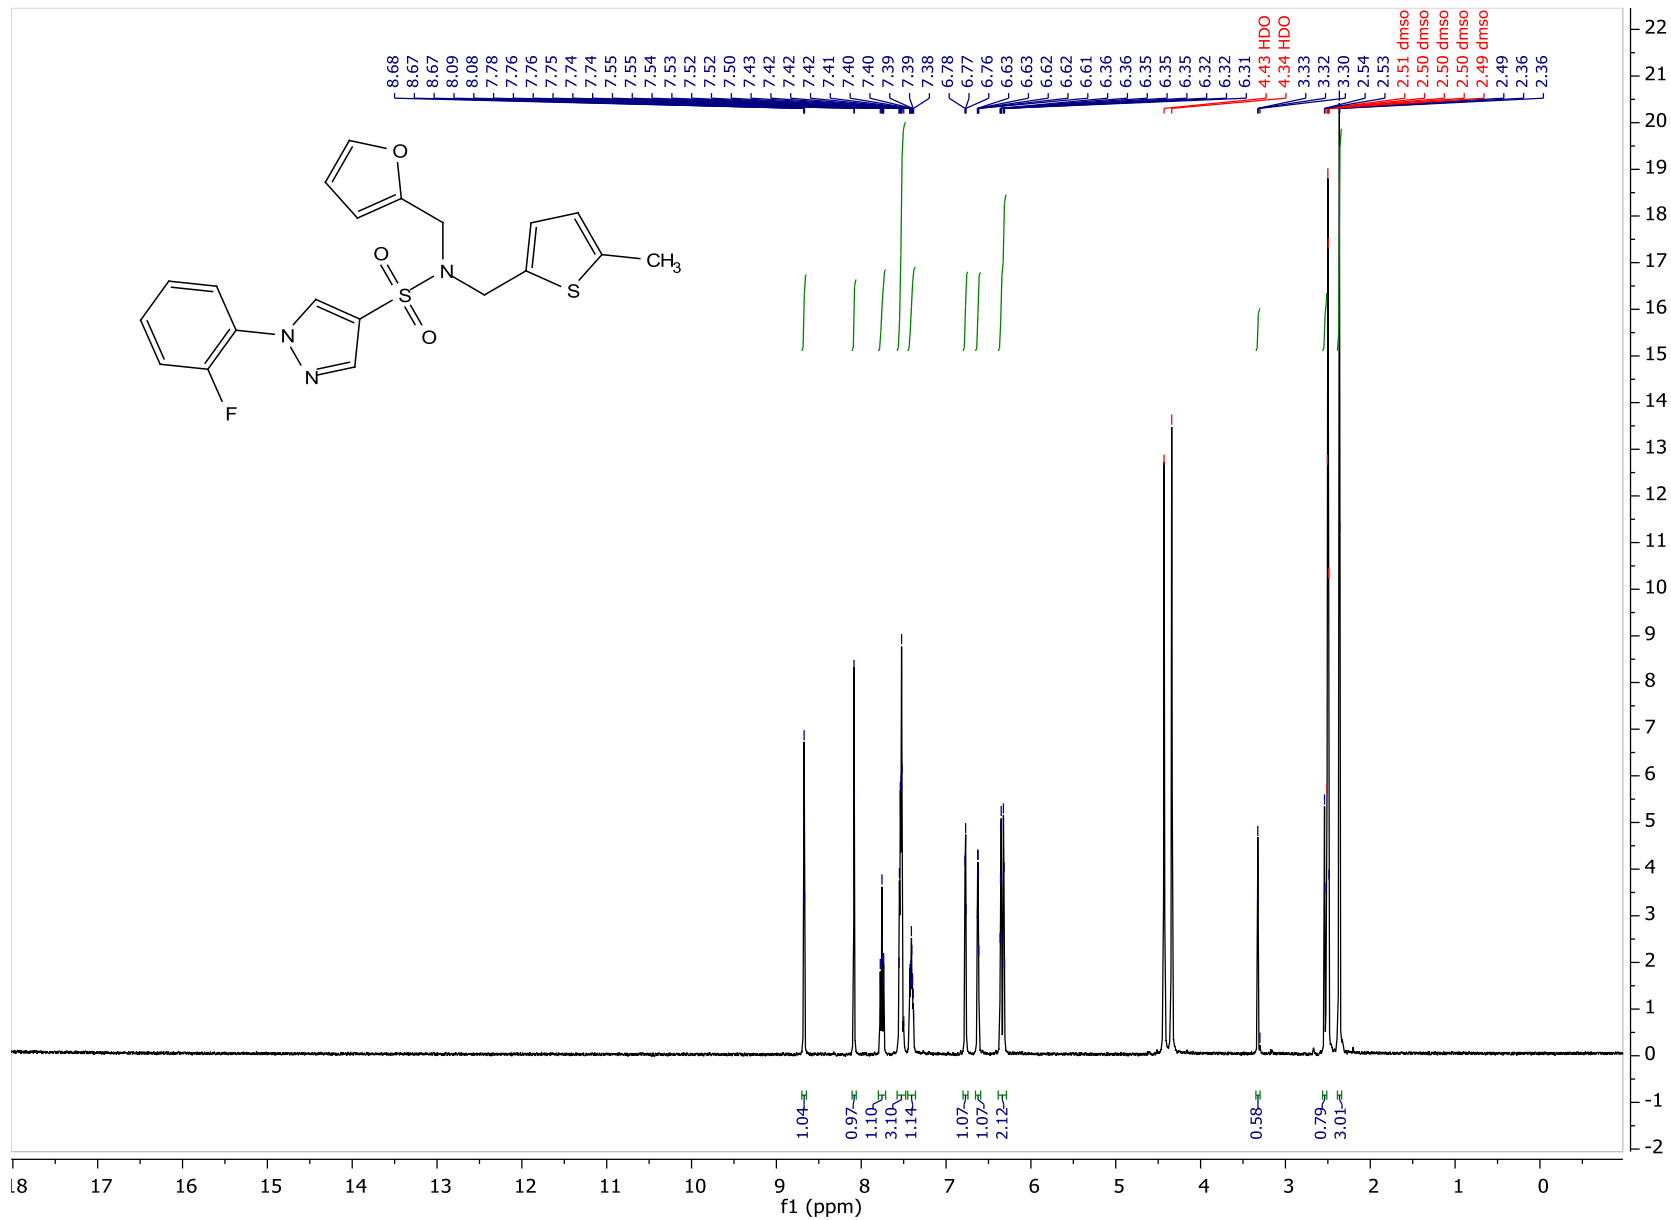

<sup>13</sup>C NMR spectrum of Z1270981281

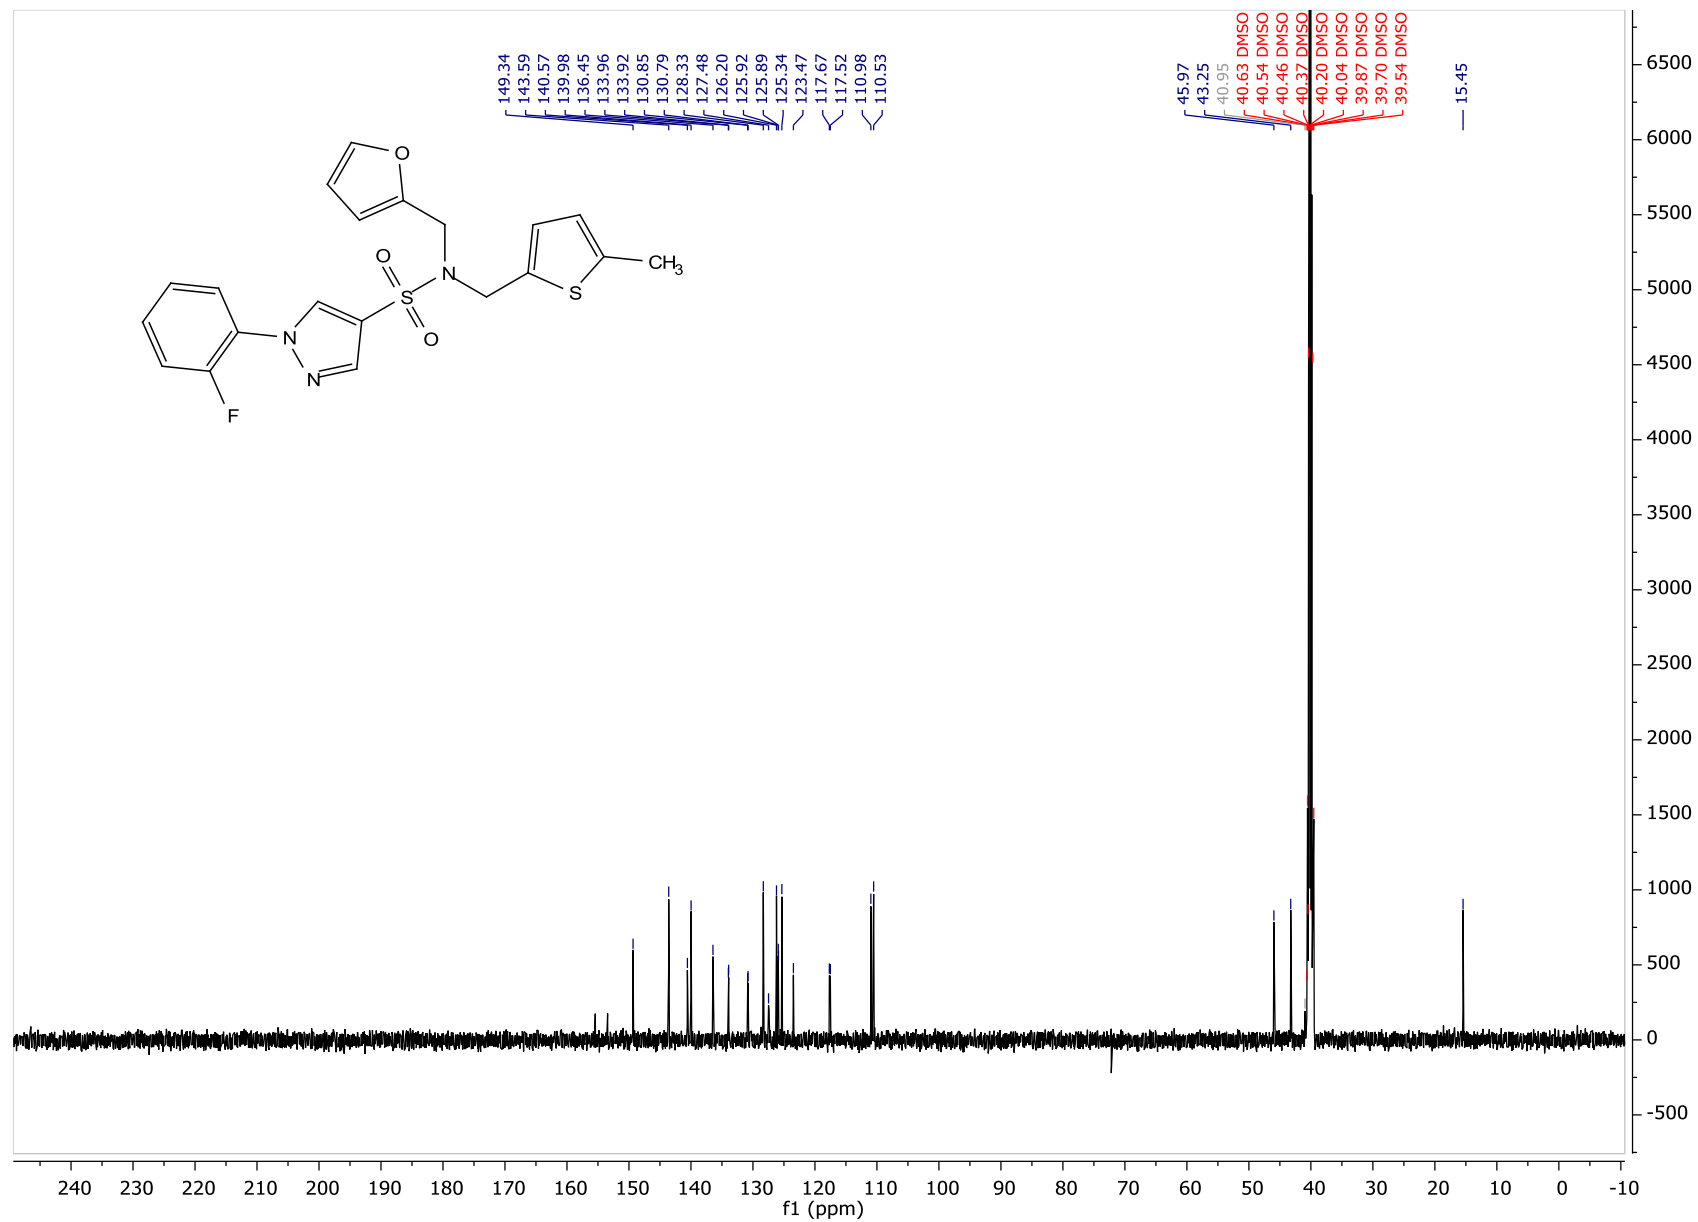



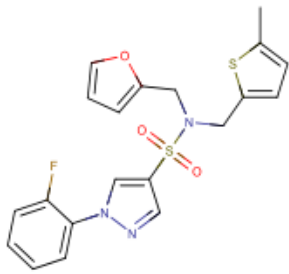

**Mol Wt** 431.5  
**Exact Mass** 431.09

| # | Time  | Area%  |
|---|-------|--------|
| 1 | 1.468 | 100.00 |

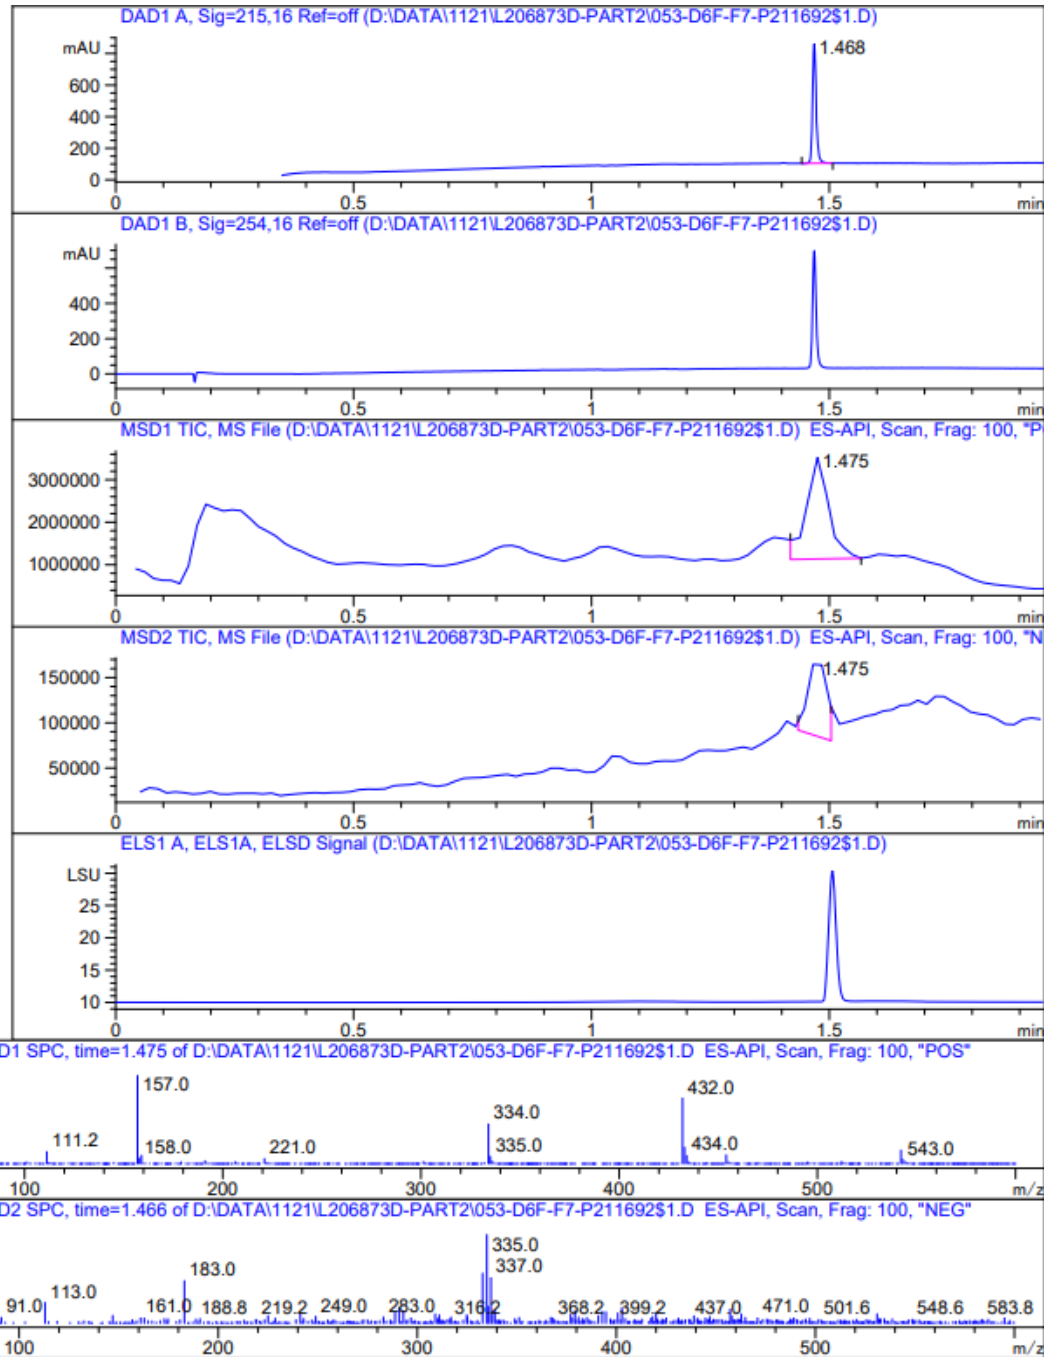

<sup>1</sup>H NMR spectrum of Z1565632280

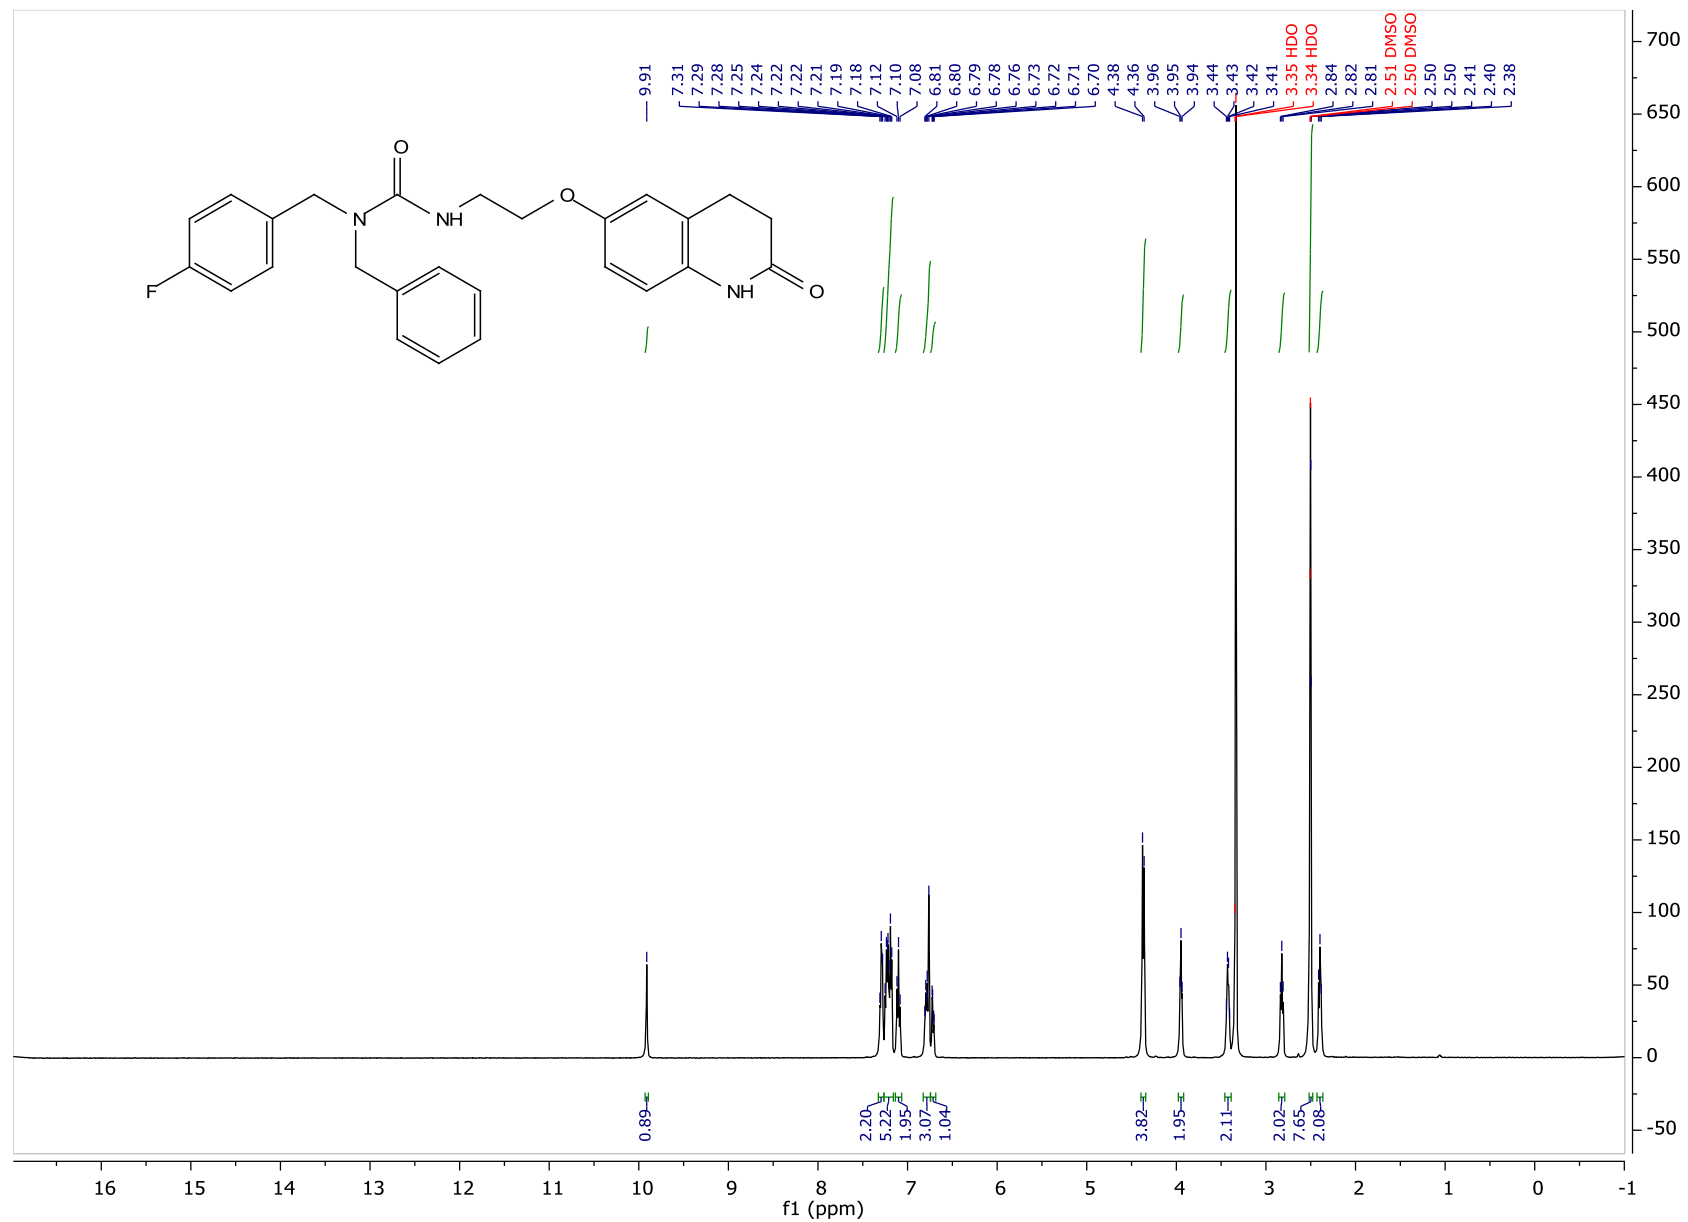

<sup>13</sup>C NMR spectrum of Z1565632280

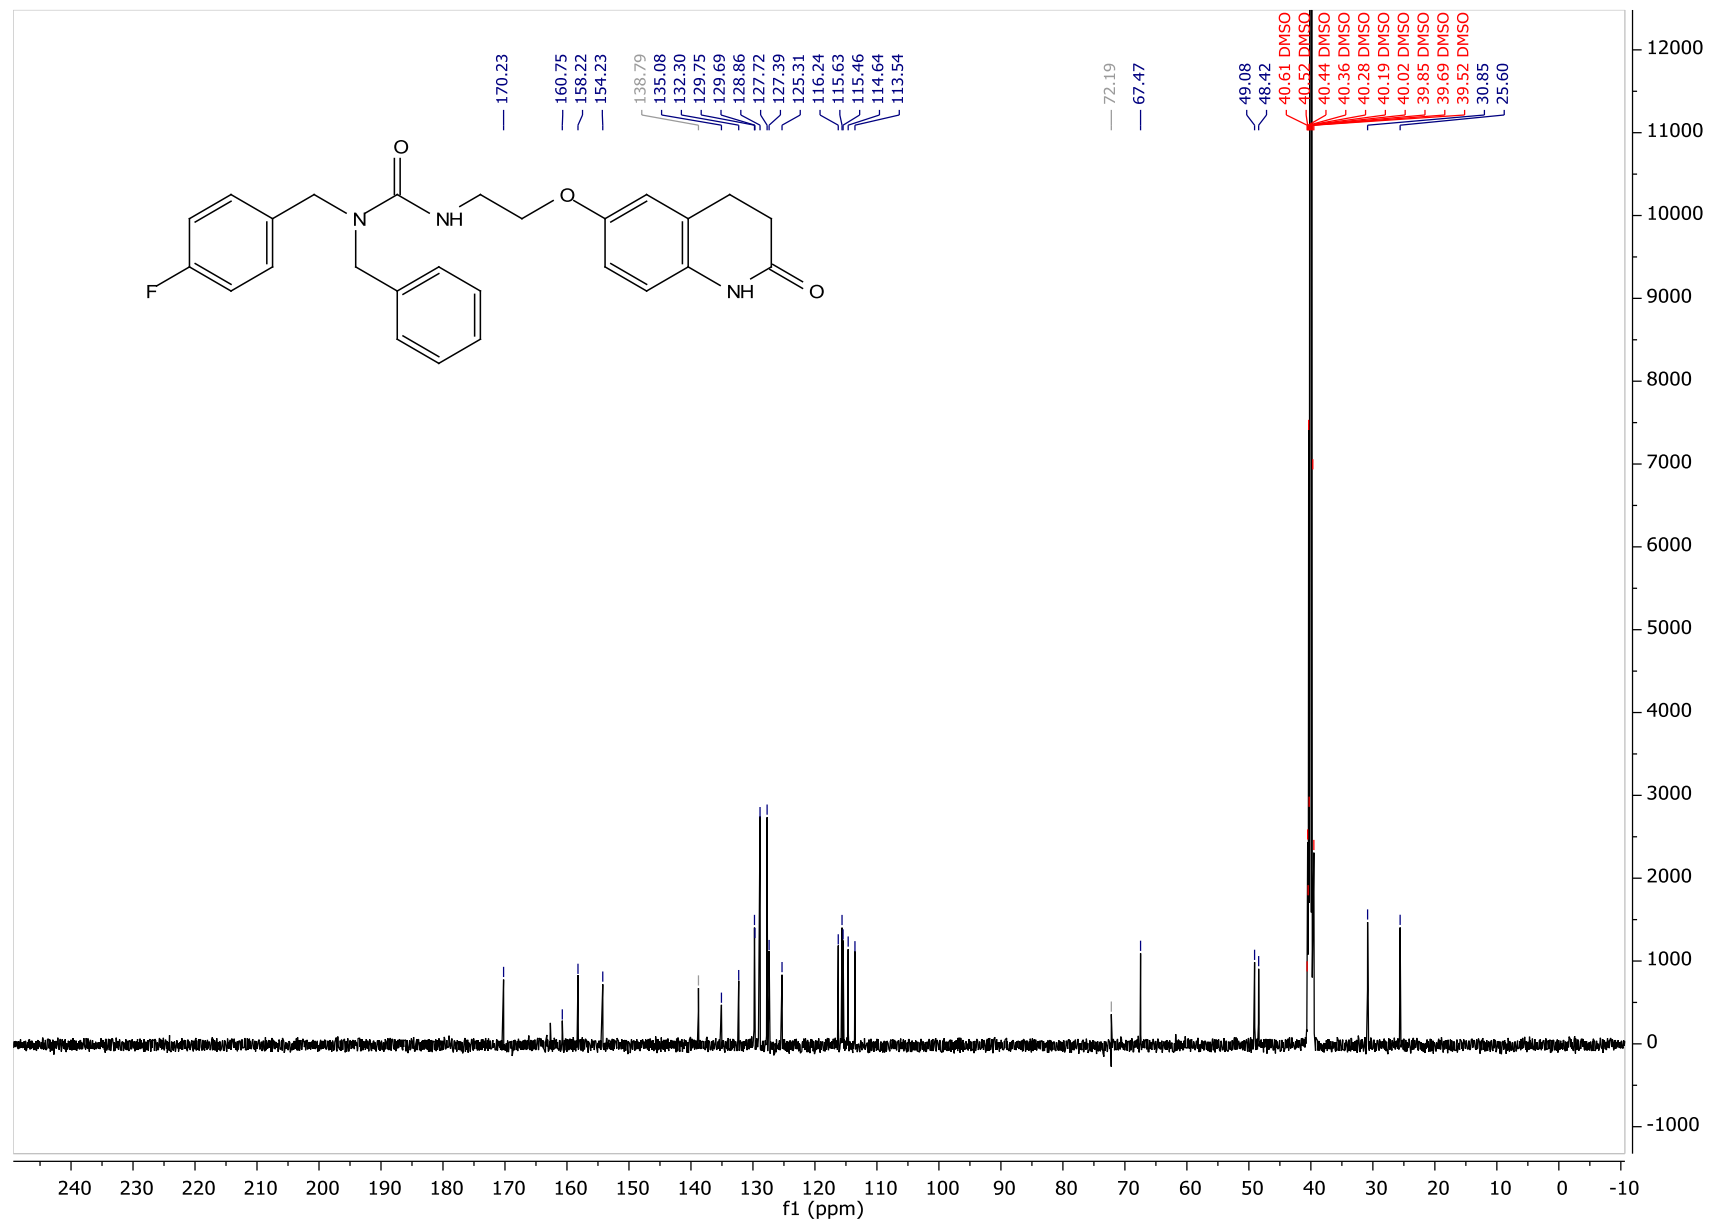

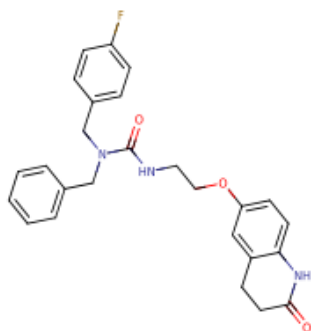

**Mol Wt** 447.5

**Exact Mass** 447.23

| # | Time  | Area%  |
|---|-------|--------|
| 1 | 1.397 | 100.00 |

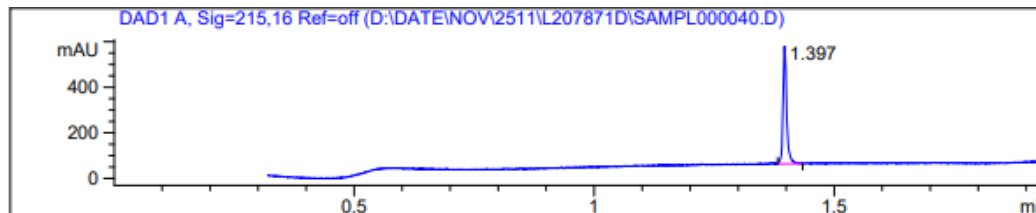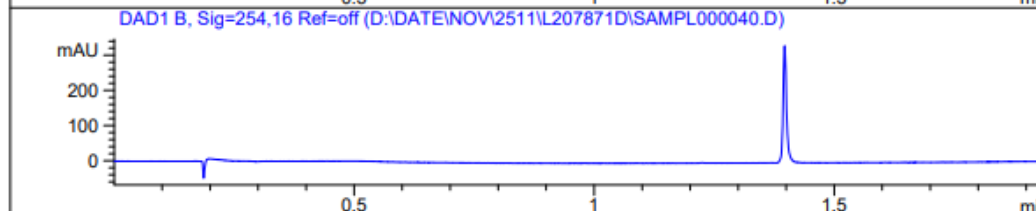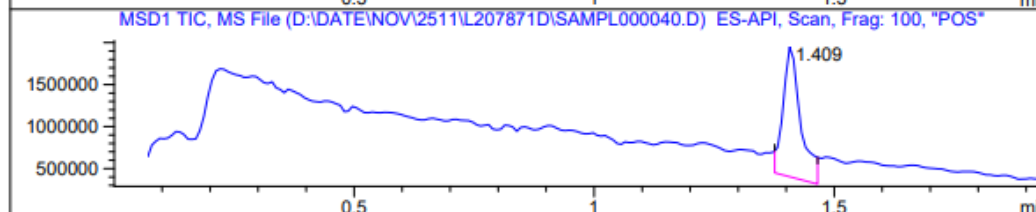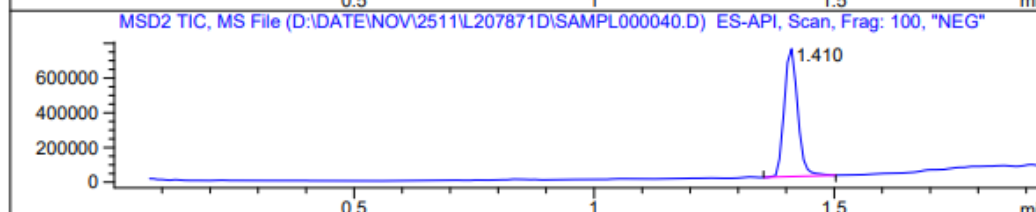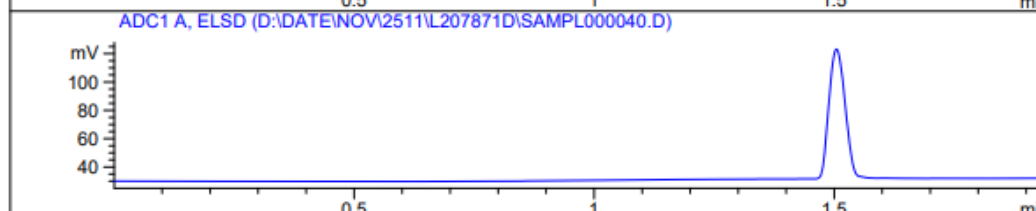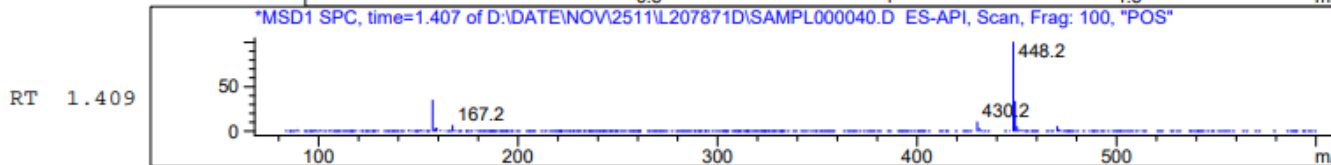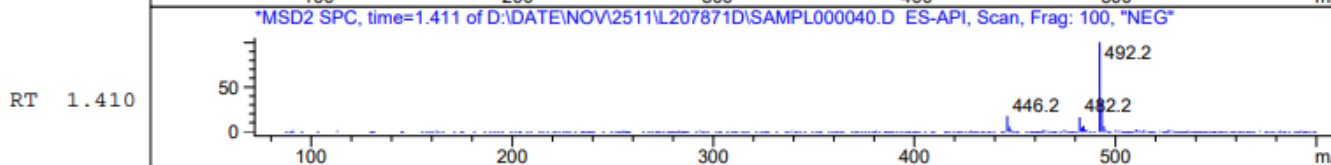

<sup>1</sup>H NMR spectrum of Z1581087524

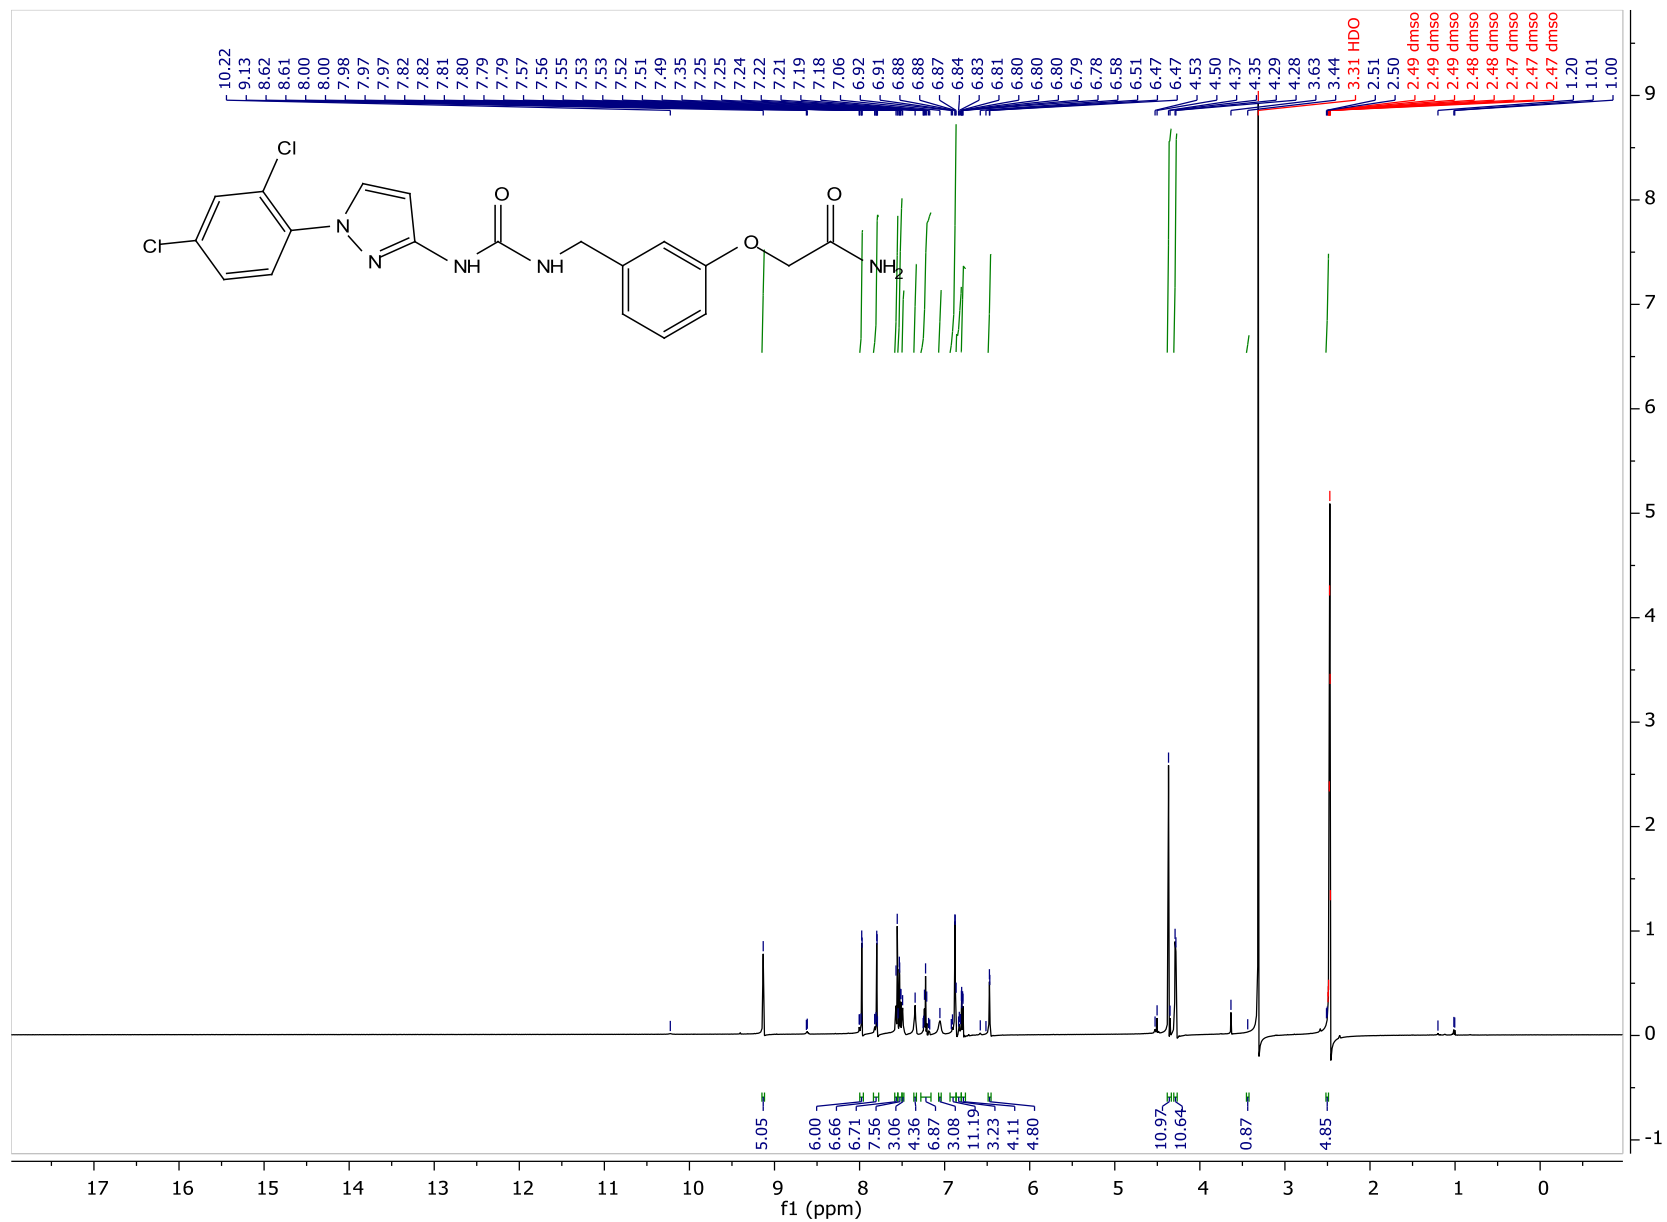

<sup>13</sup>C NMR spectrum of Z1581087524

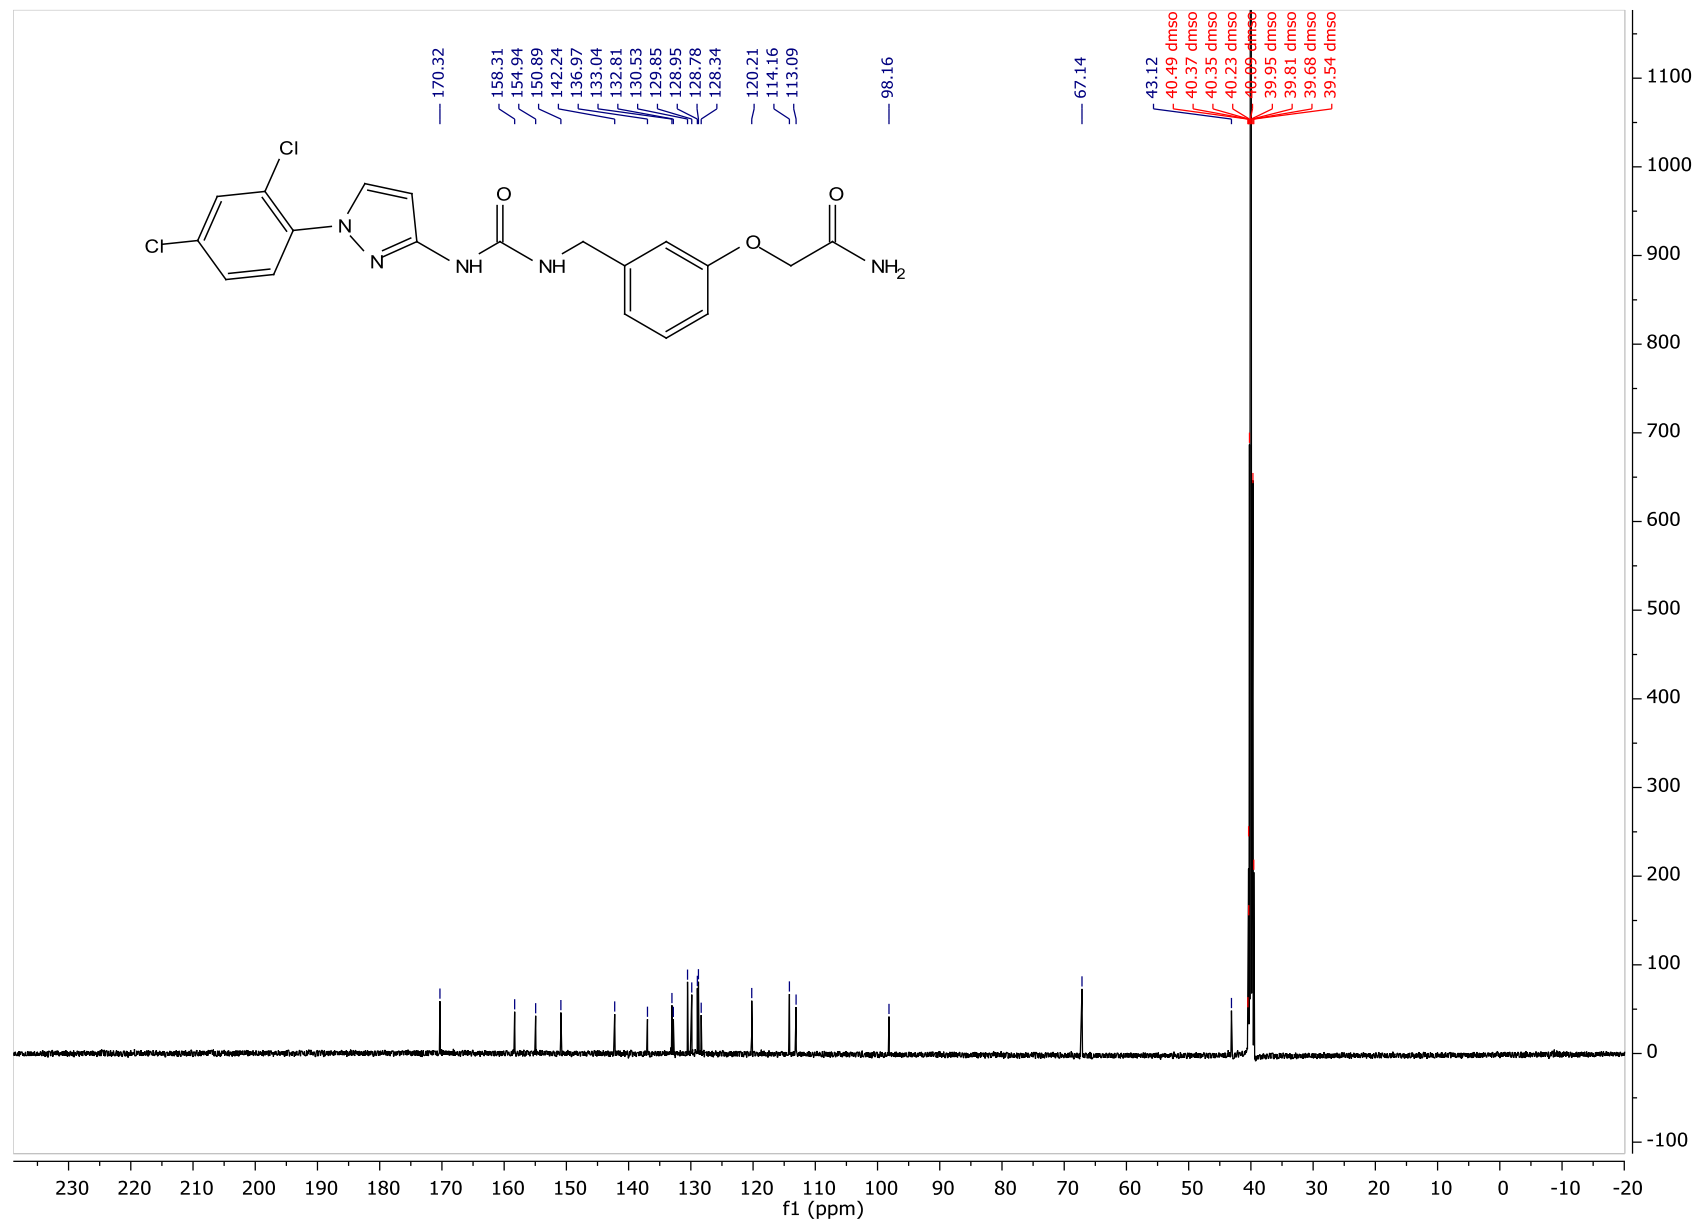

Ret\_Time: 1.191 min

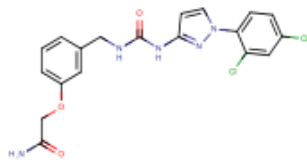

**Mol Wt** 434.28  
**Exact Mass** 433.08

| # | Time  | Area% |
|---|-------|-------|
| 1 | 1.191 | 94.93 |
| 2 | 1.243 | 5.07  |

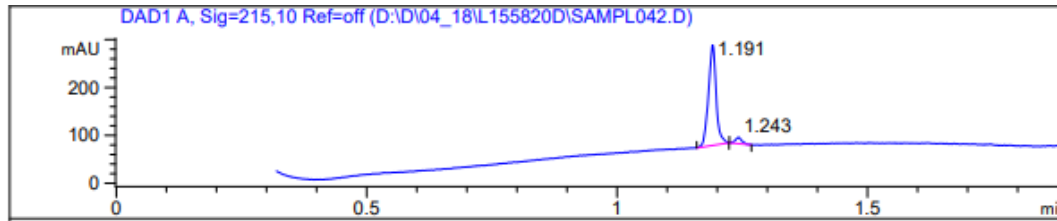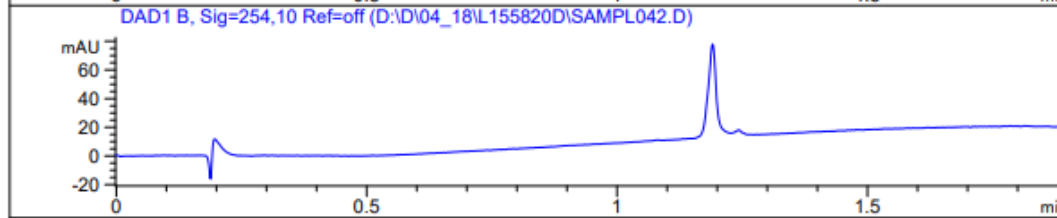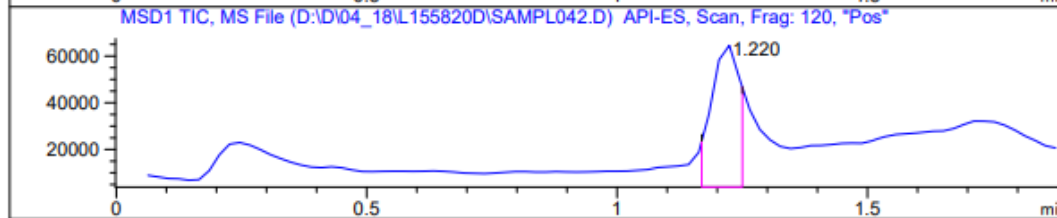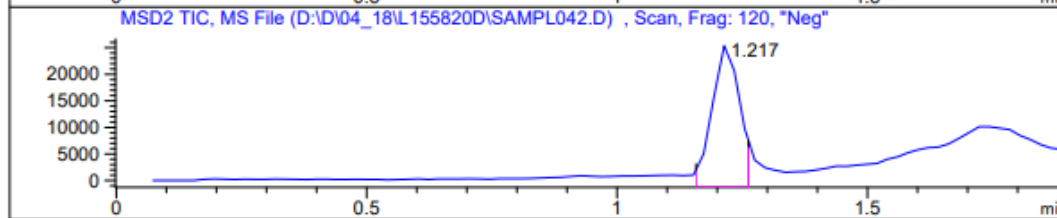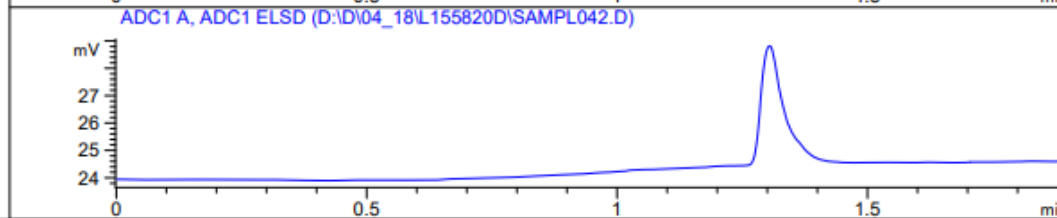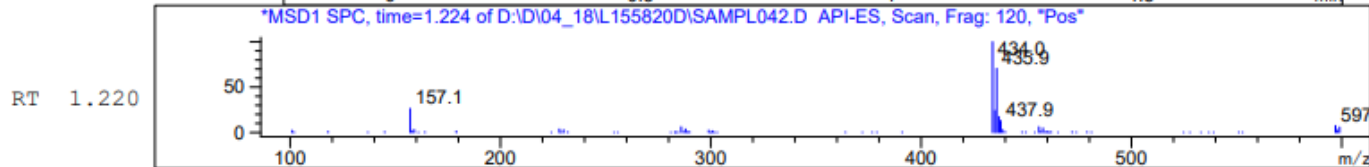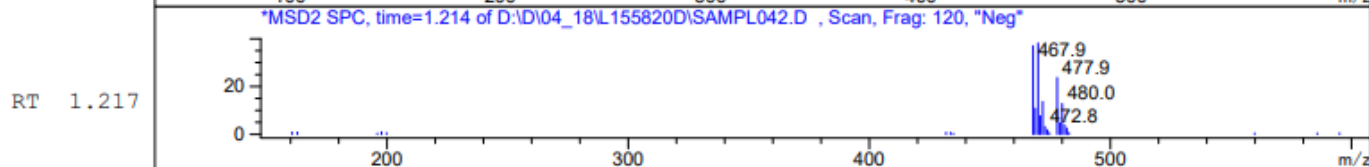

<sup>1</sup>H NMR spectrum of Z1733663498

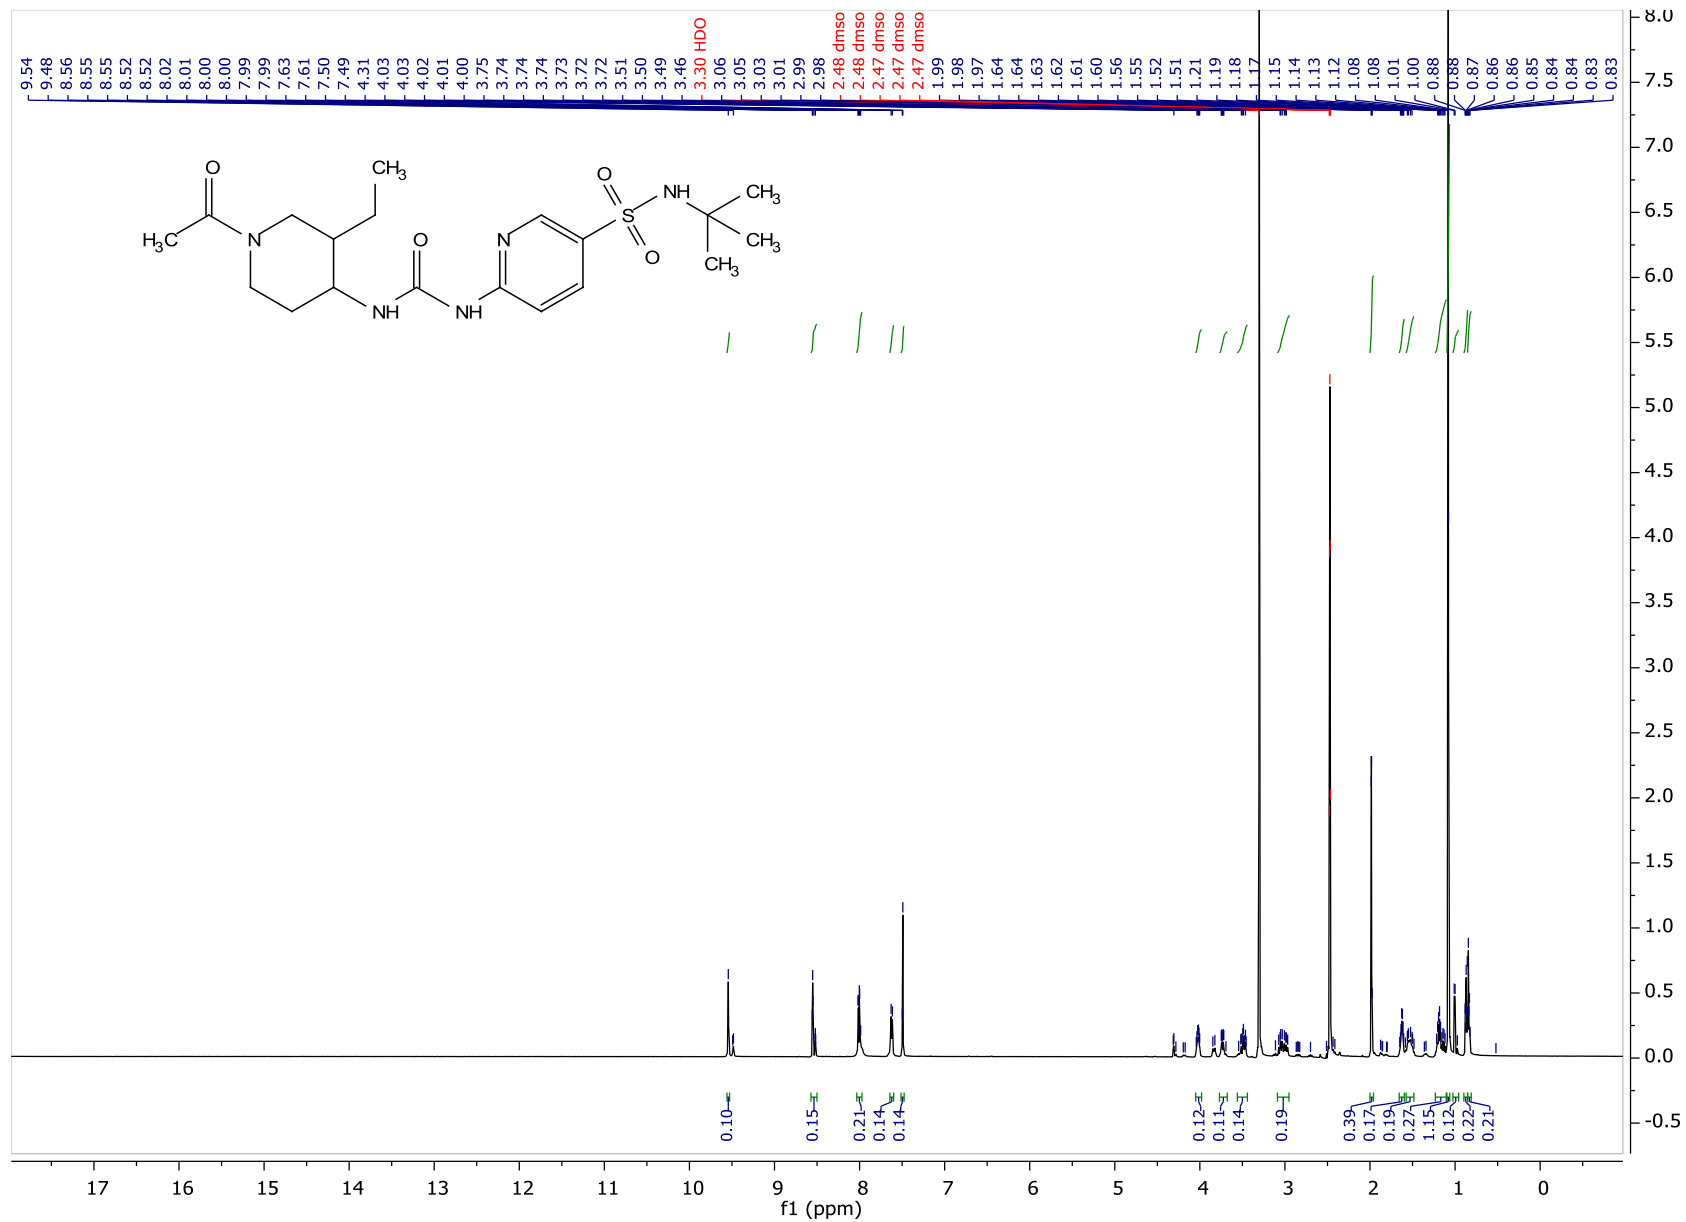



<sup>13</sup>C NMR spectrum of Z1733663498

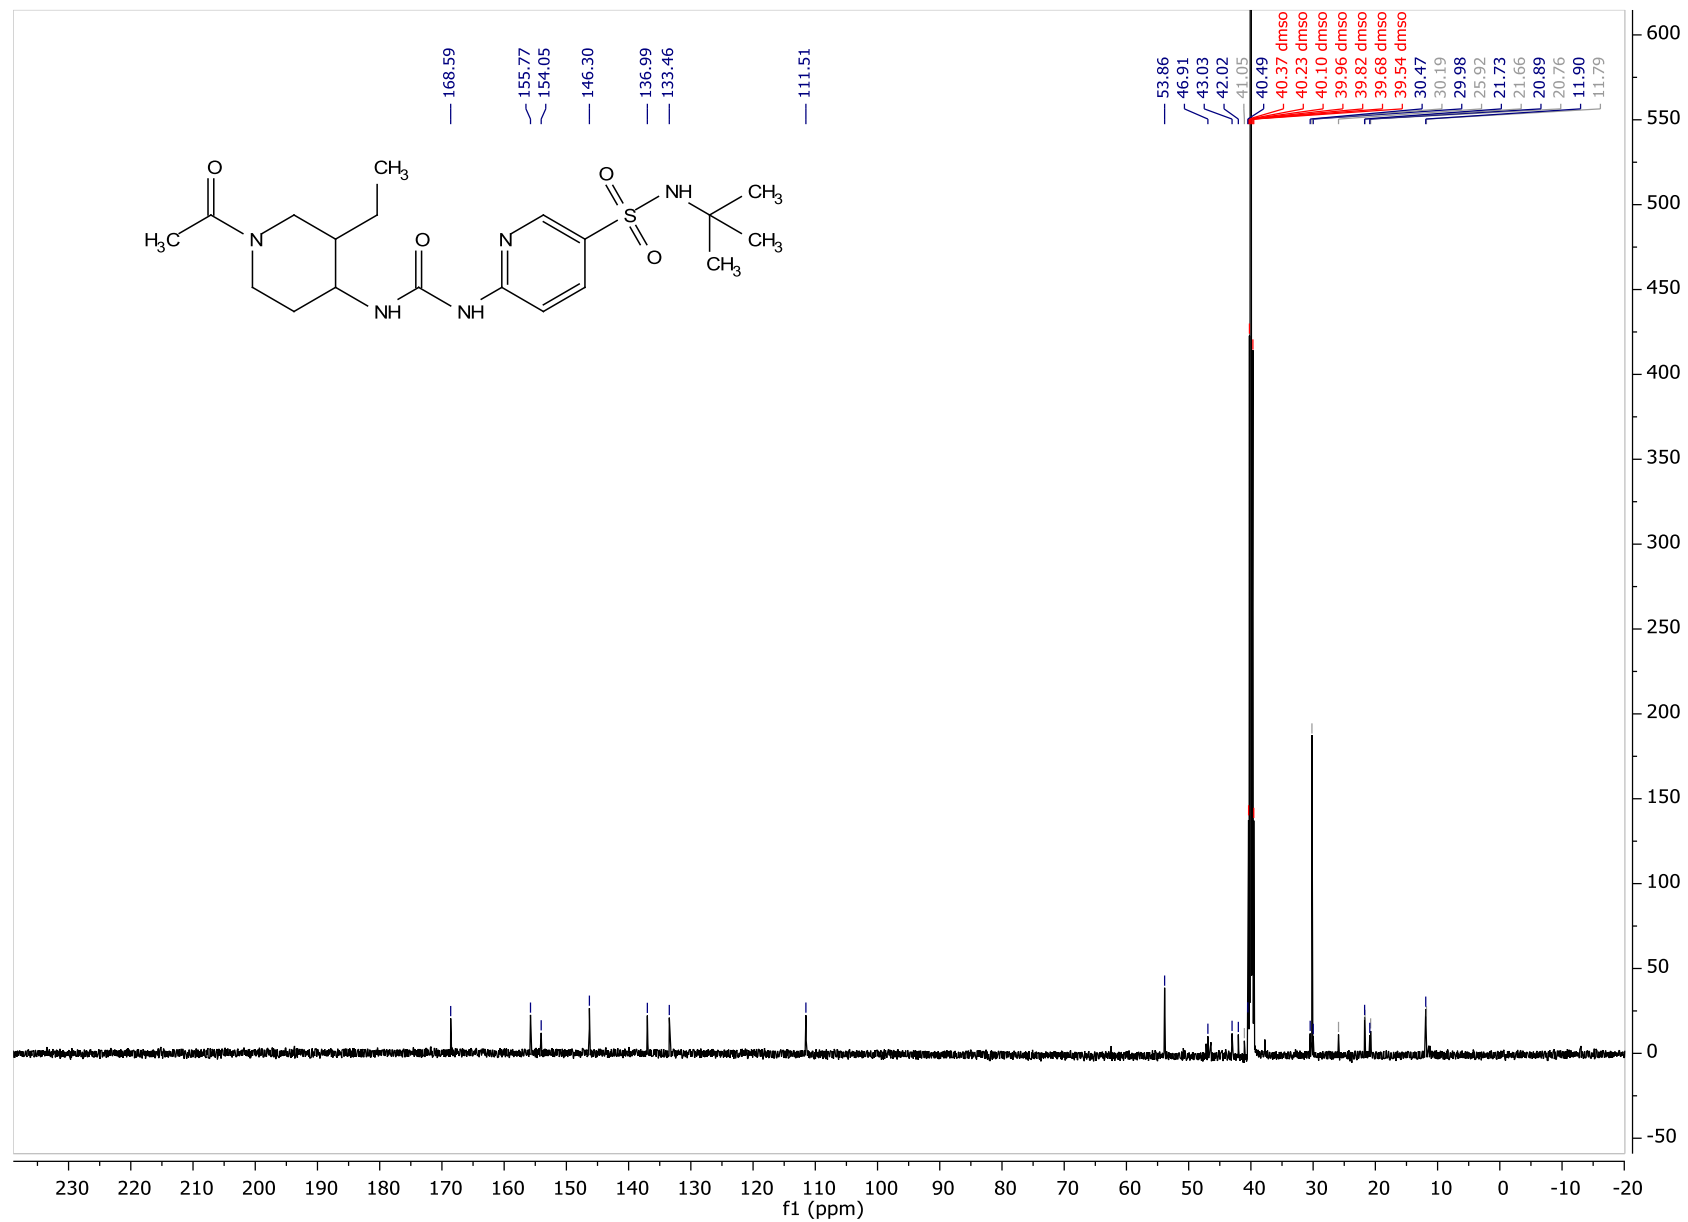

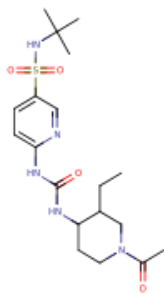

Mol Wt 425.55  
 Exact Mass 425.24

| # | Time  | Area%  |
|---|-------|--------|
| 1 | 1.135 | 100.00 |

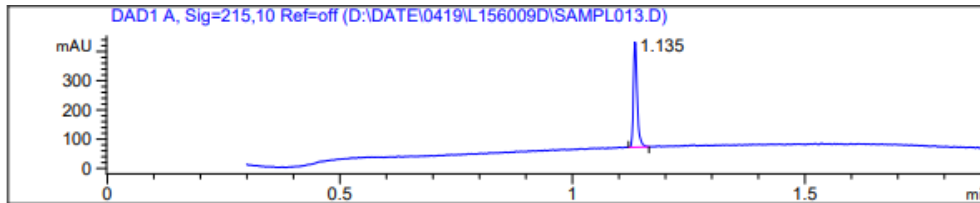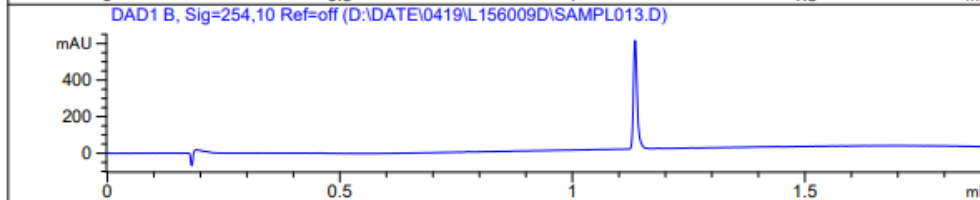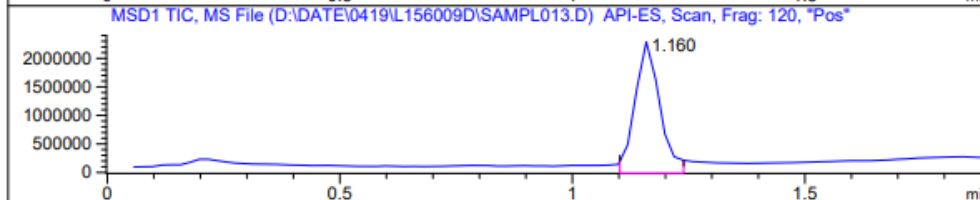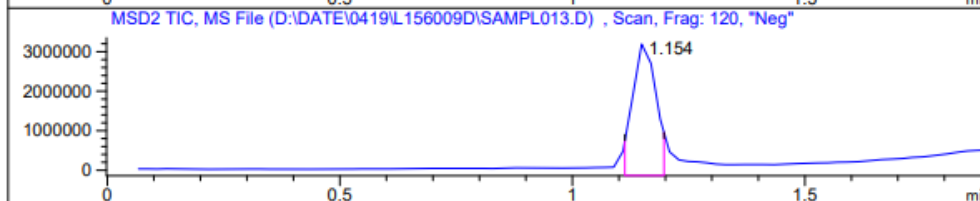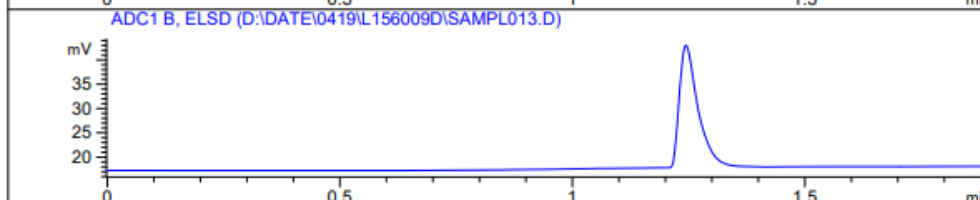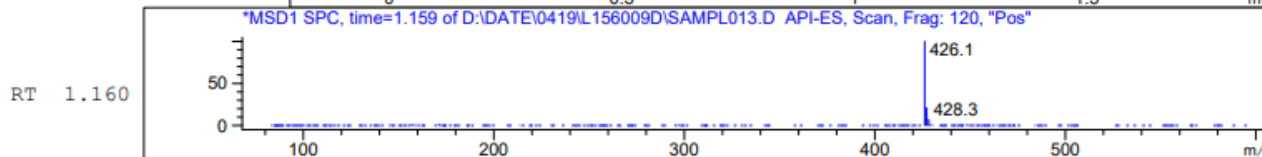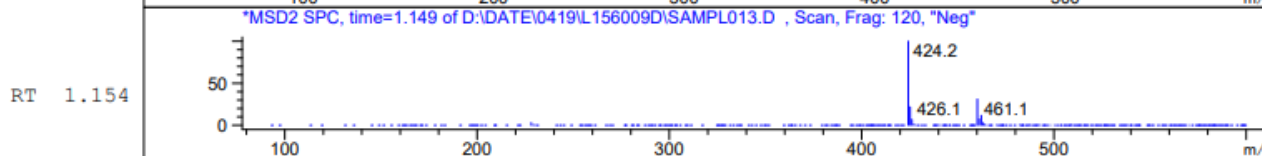

<sup>1</sup>H NMR spectrum of Z1733663560

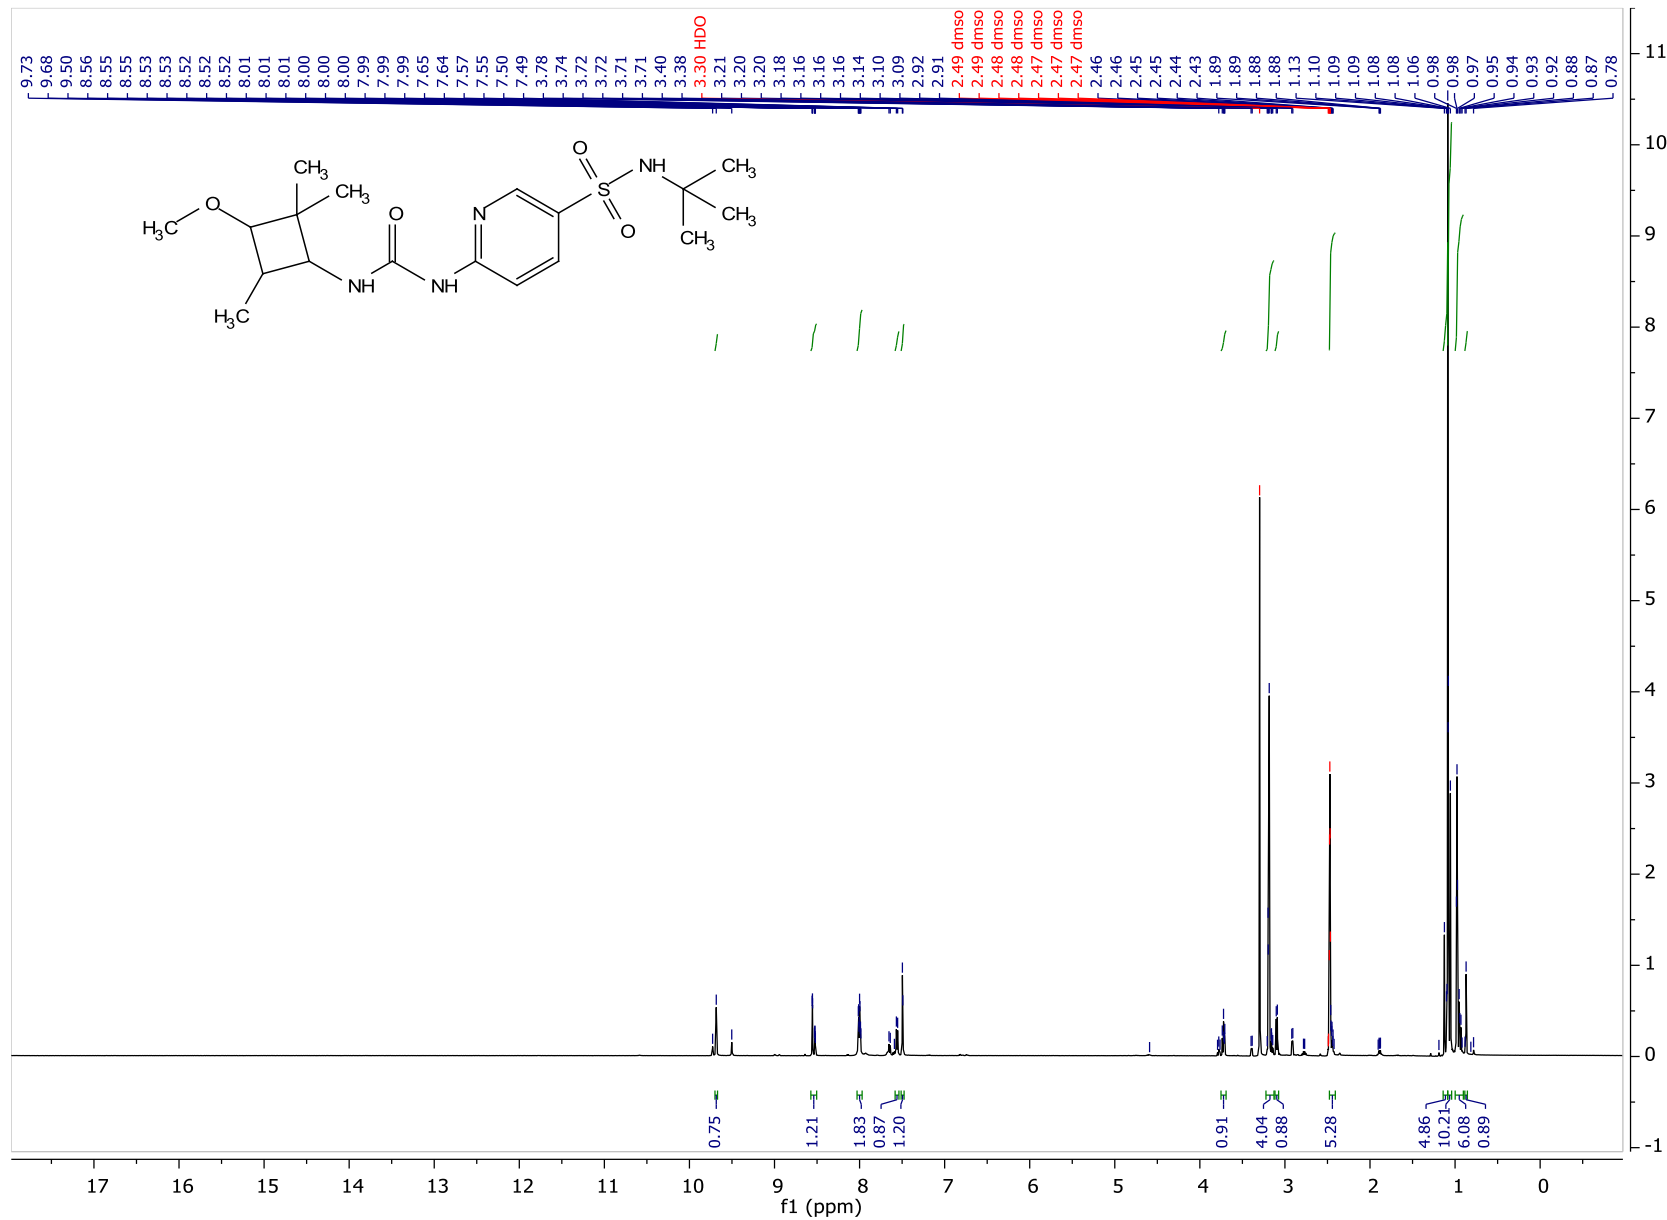

<sup>13</sup>C NMR spectrum of Z1733663560

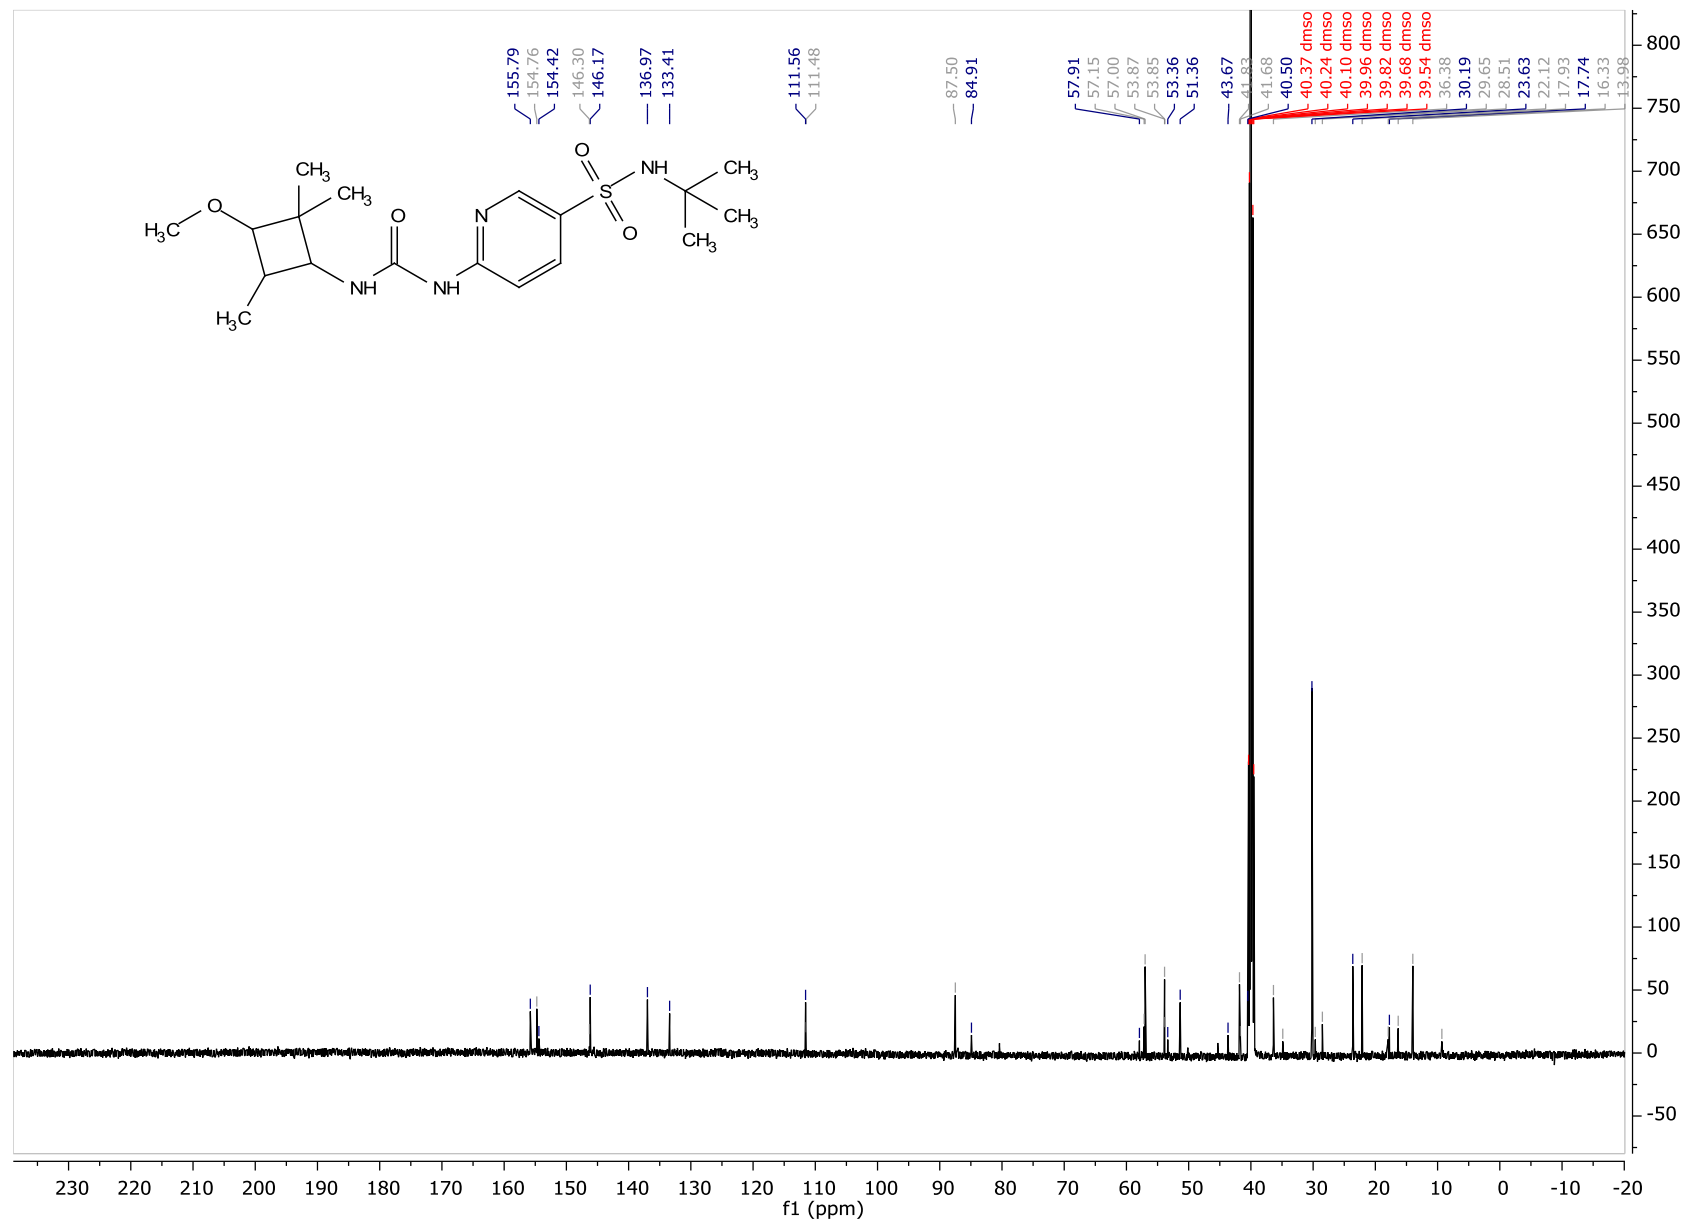

Ret\_Time: 1.293 min

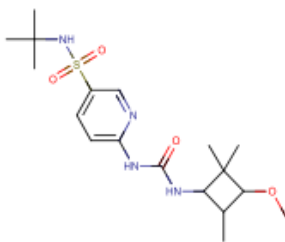

Mol Wt 398.52  
Exact Mass 398.23

| # | Time  | Area% |
|---|-------|-------|
| 1 | 1.293 | 61.74 |
| 2 | 1.309 | 18.19 |
| 3 | 1.326 | 10.51 |
| 4 | 1.336 | 9.56  |

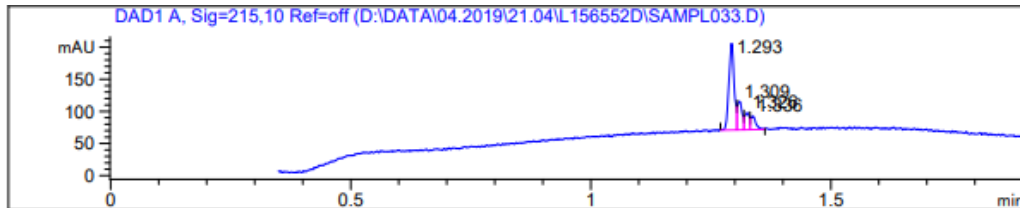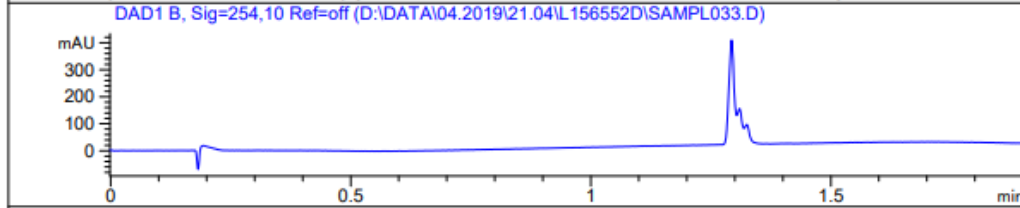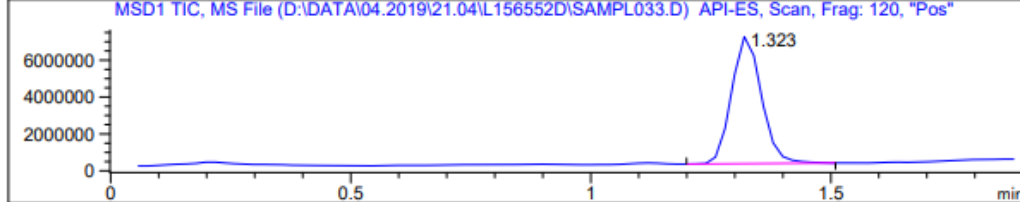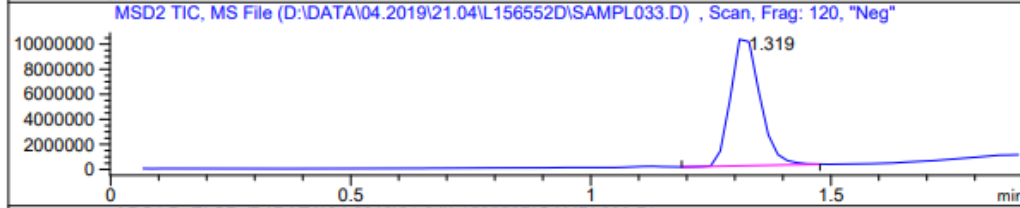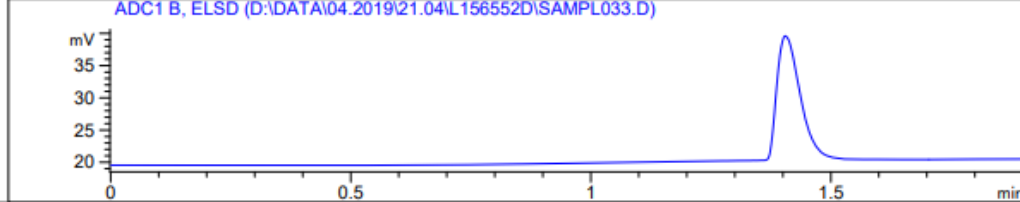

RT 1.323

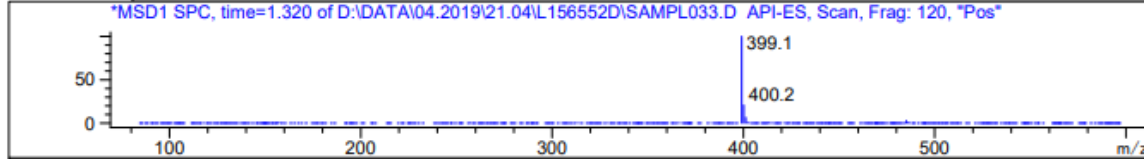

RT 1.319

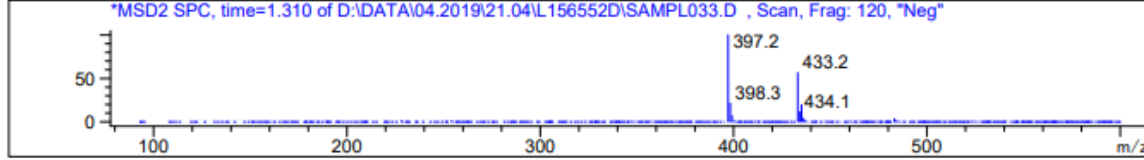

<sup>1</sup>H NMR spectrum of Z1893460093

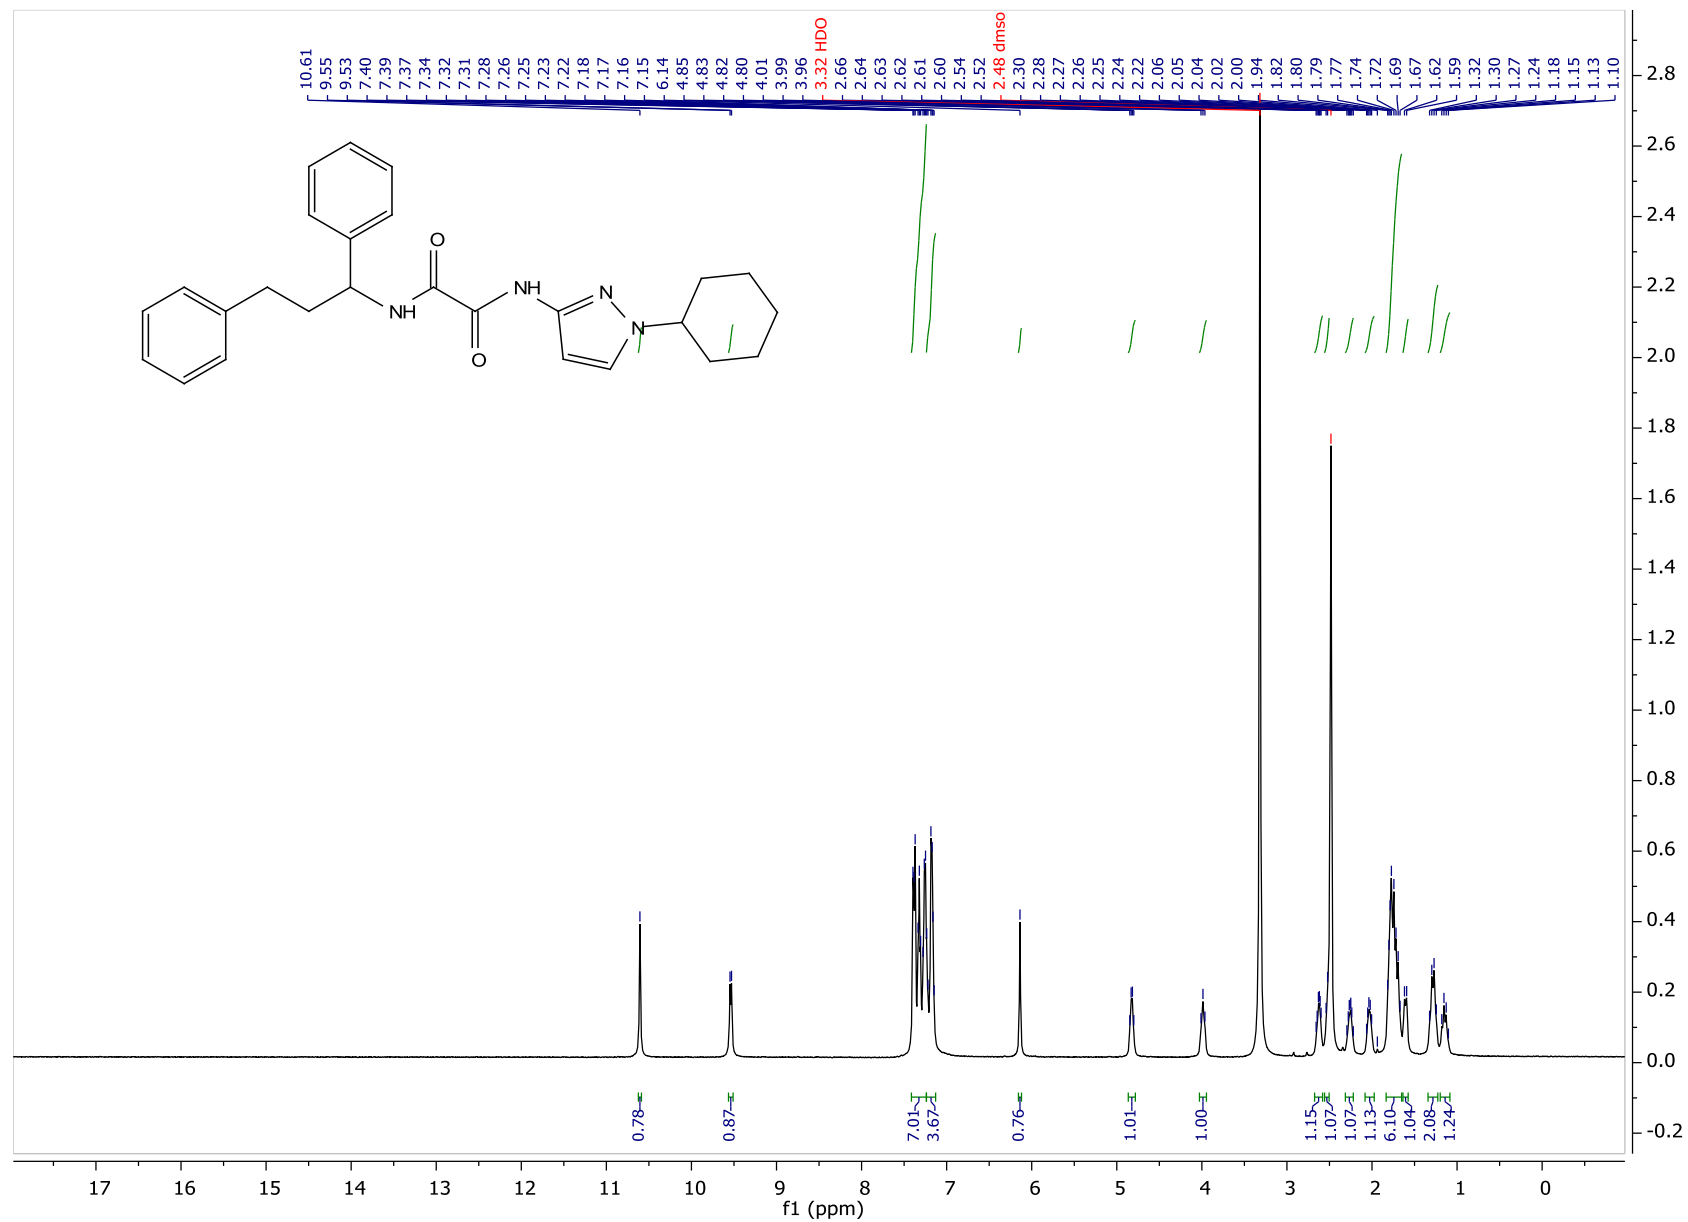

<sup>13</sup>C NMR spectrum of Z1893460093

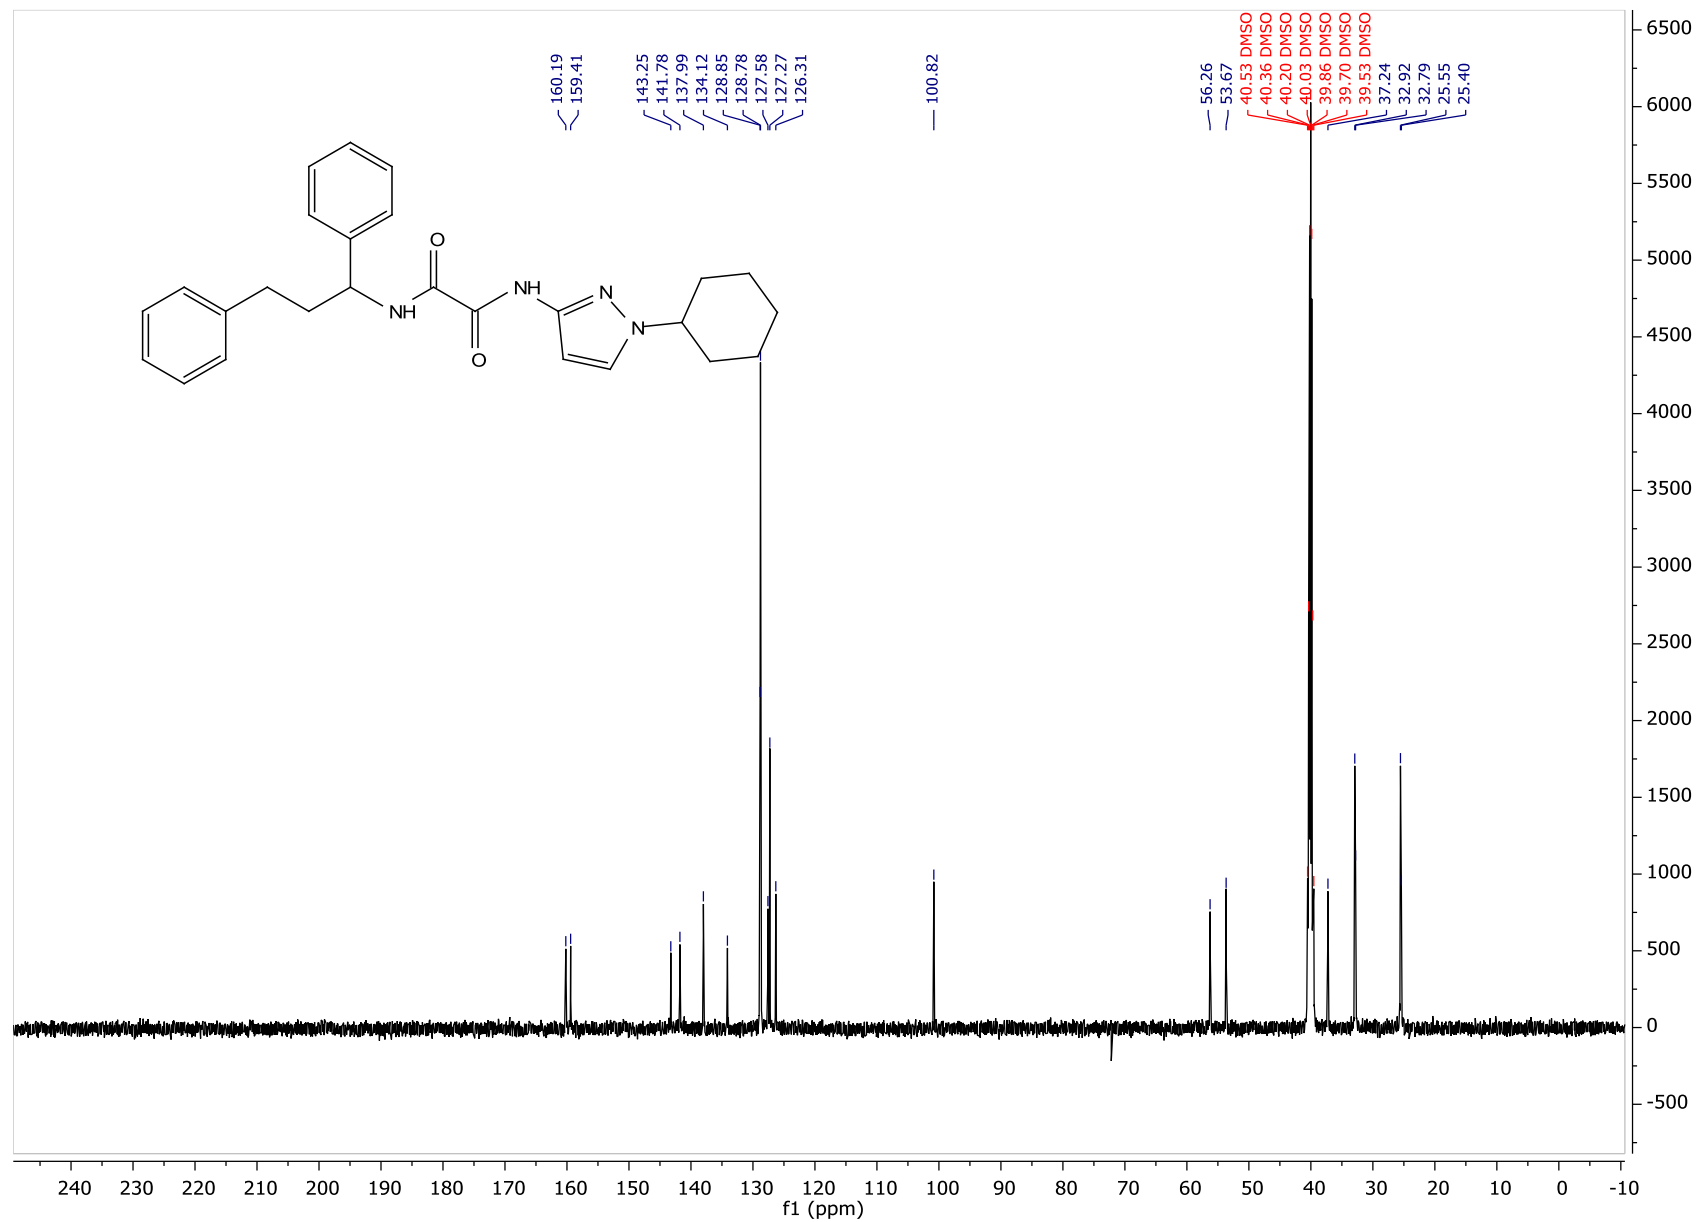

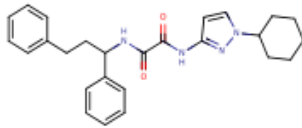

**Mol Wt** 430.54  
**Exact Mass** 430.28

| # | Time  | Area%  |
|---|-------|--------|
| 1 | 1.529 | 100.00 |

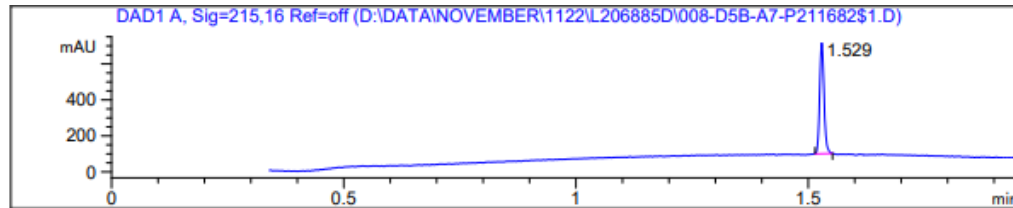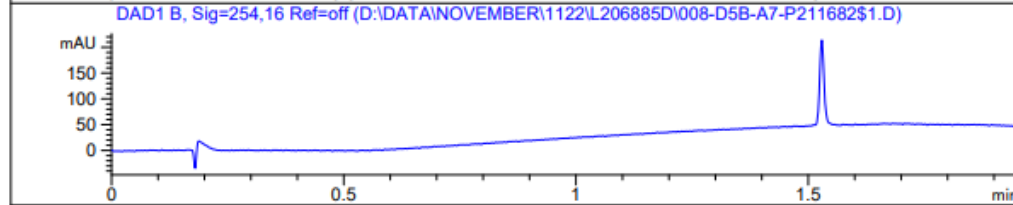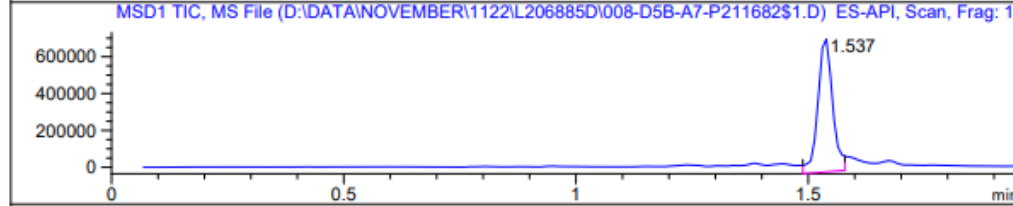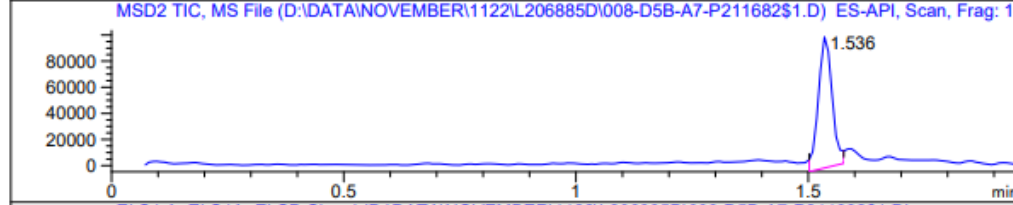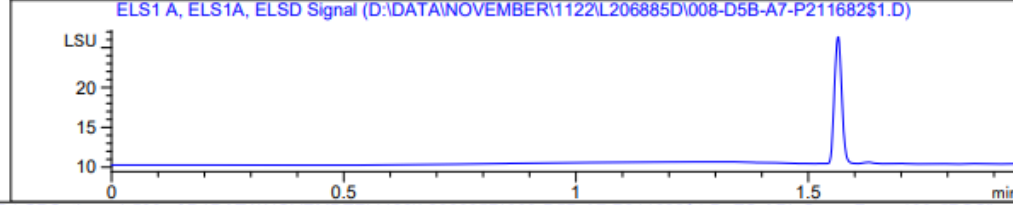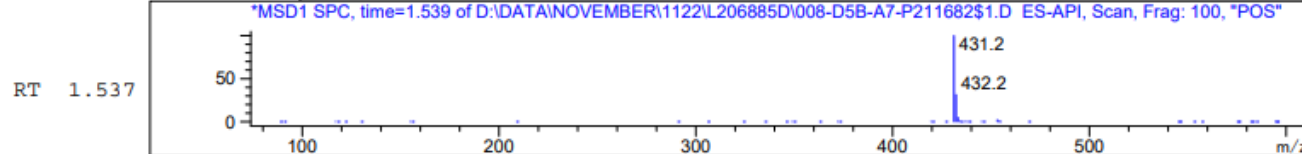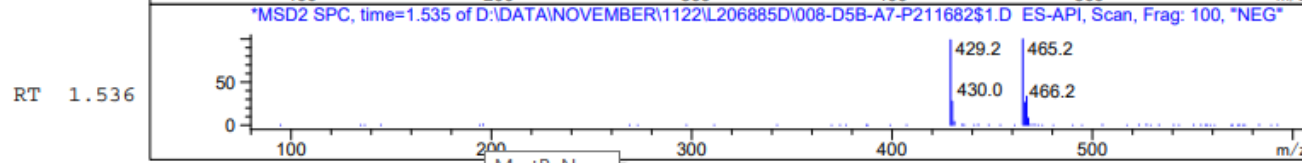



<sup>1</sup>H NMR spectrum of Z2057335502

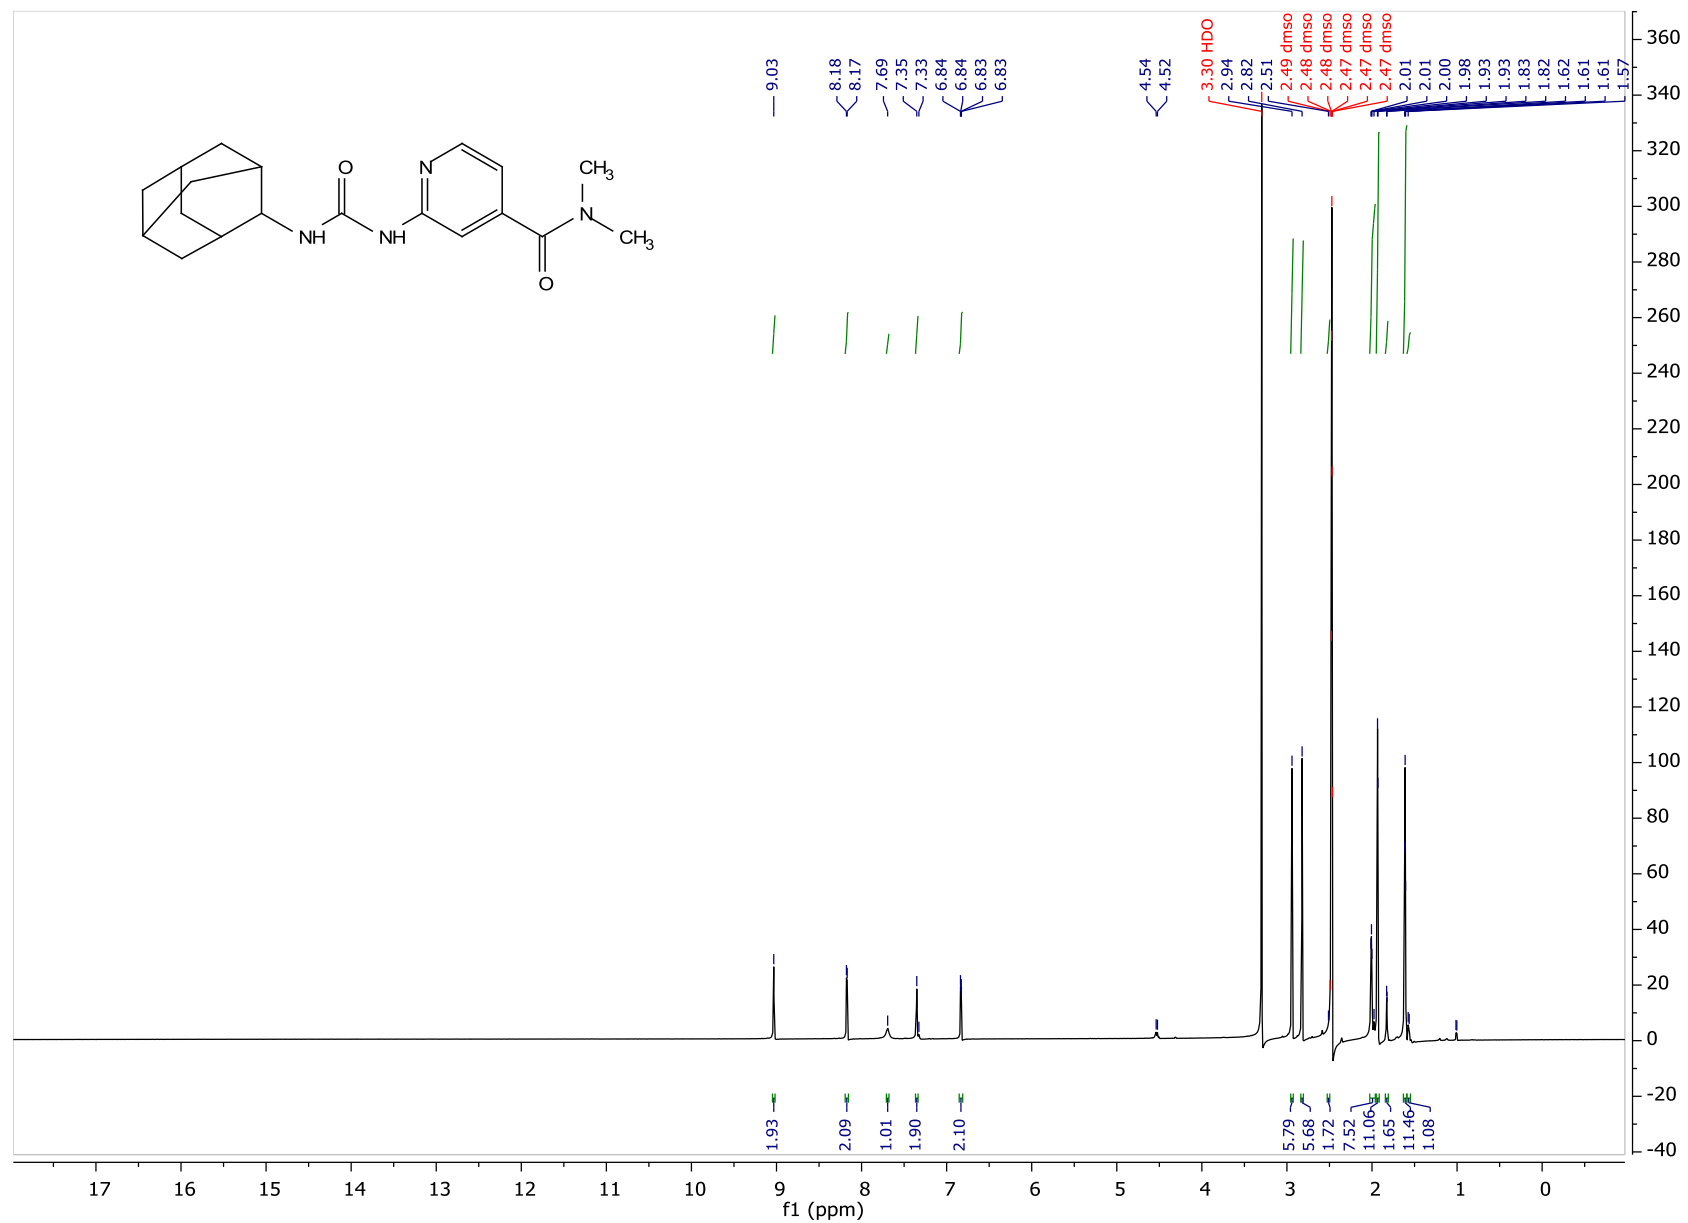

<sup>13</sup>C NMR spectrum of Z2057335502

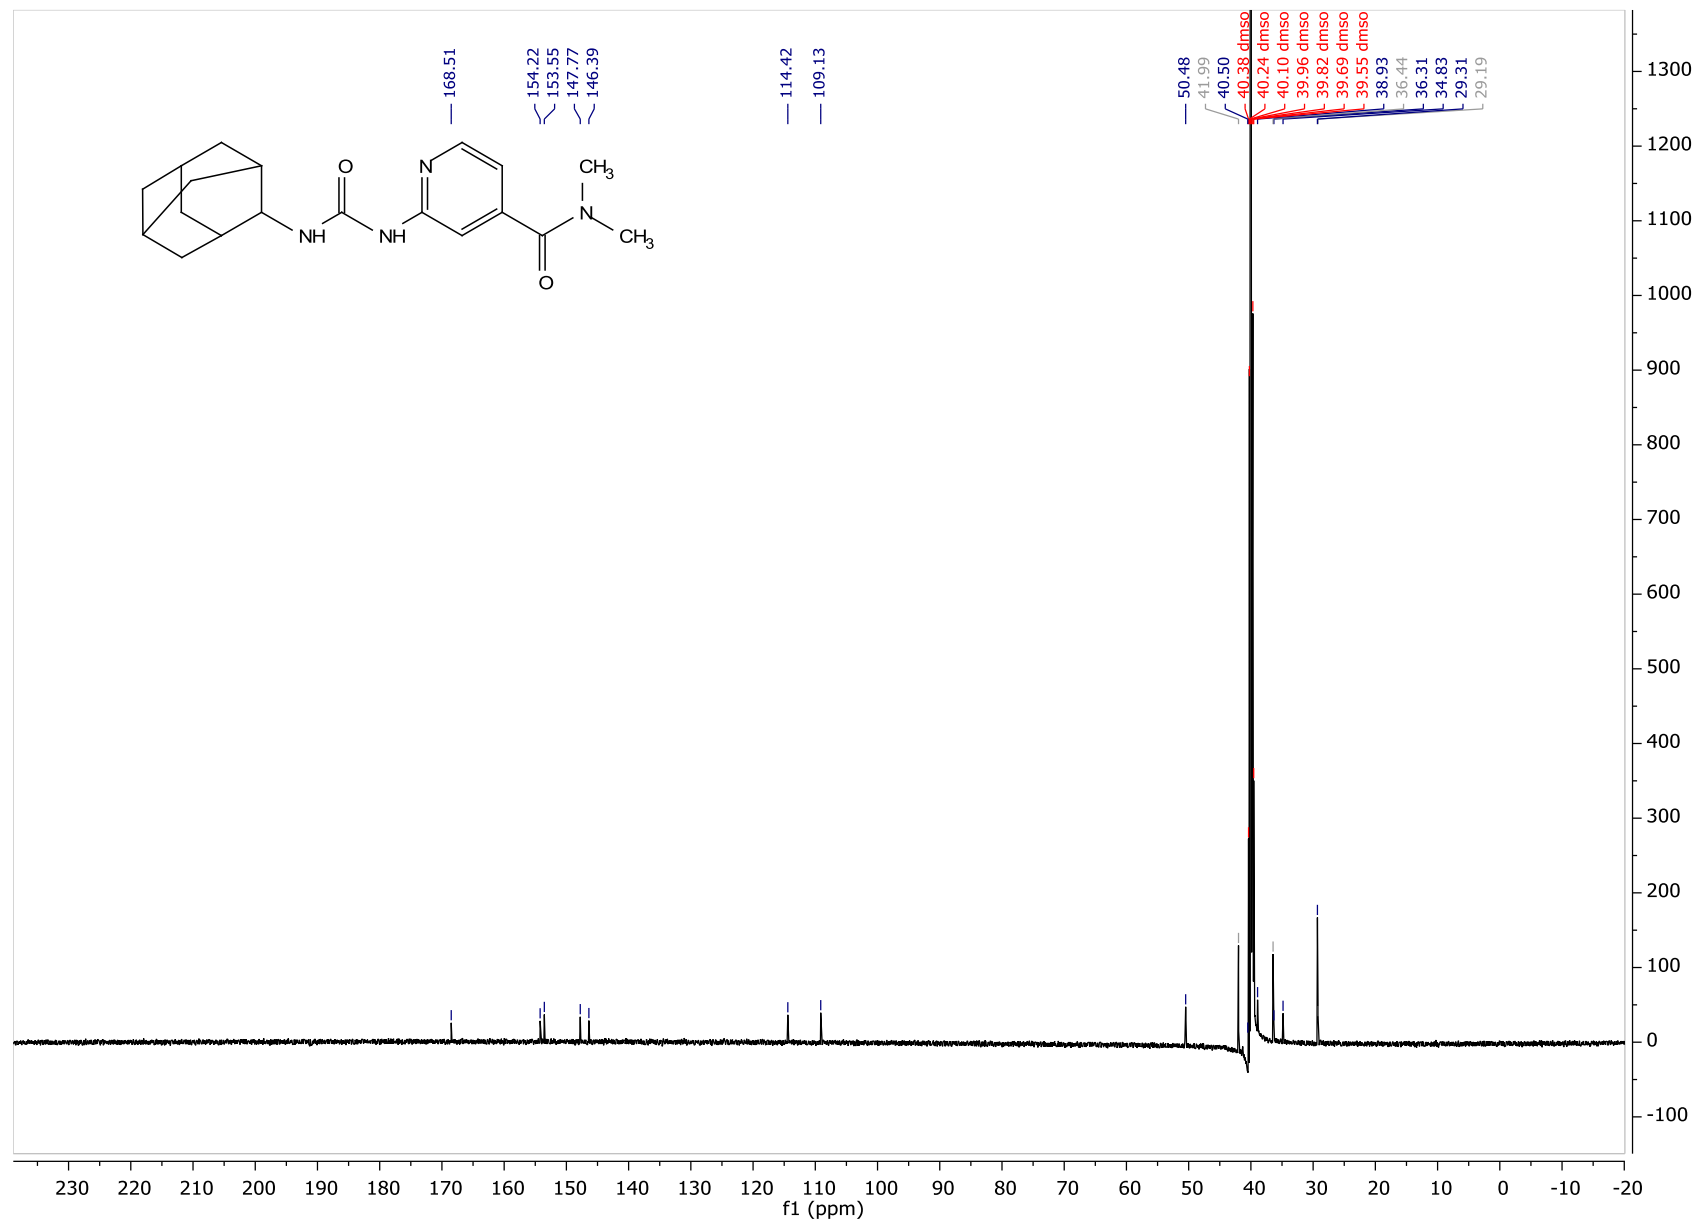

Ret\_Time: 1.332 min

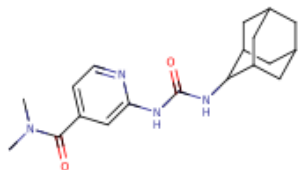

**Mol Wt** 342.44  
**Exact Mass** 342.24

| # | Time  | Area%  |
|---|-------|--------|
| 1 | 1.332 | 100.00 |

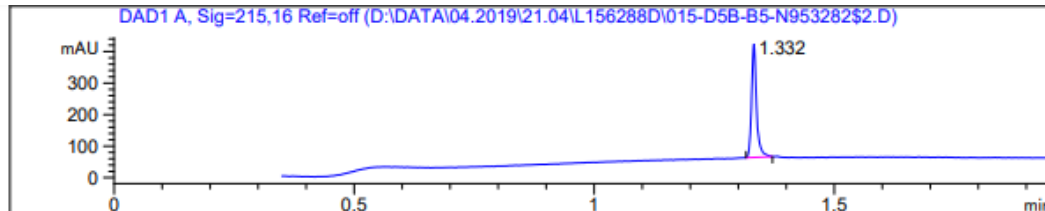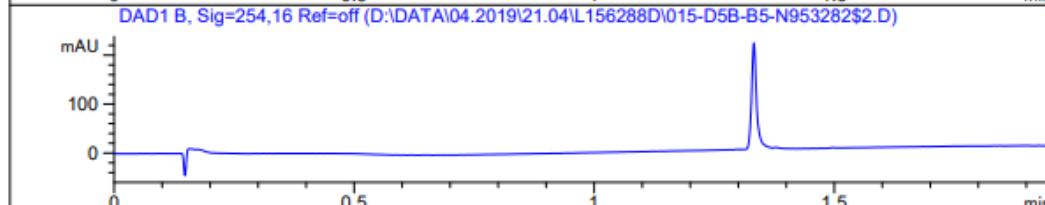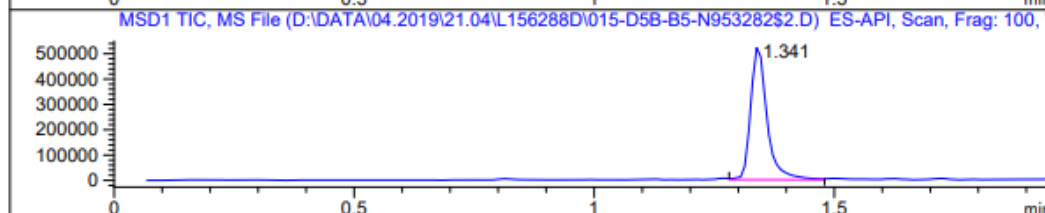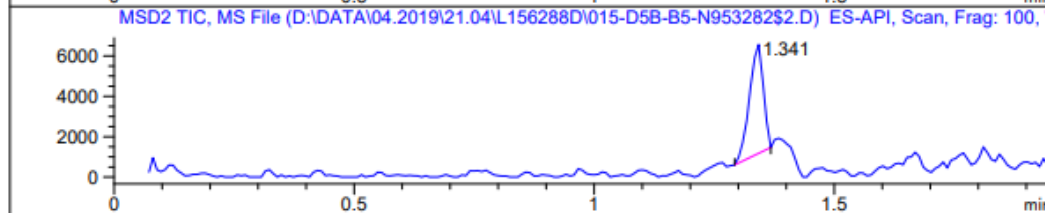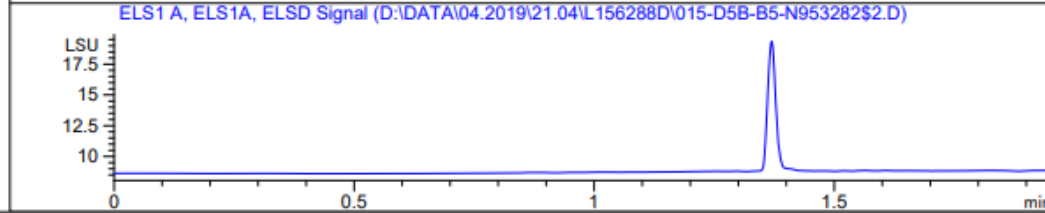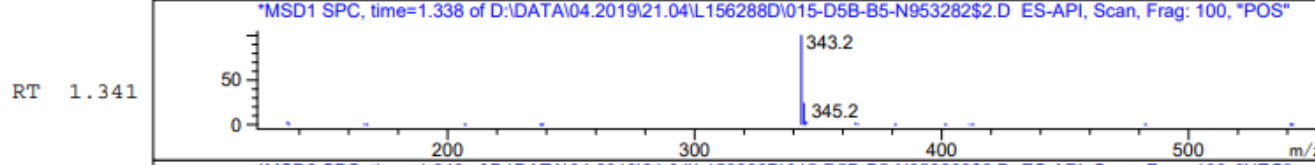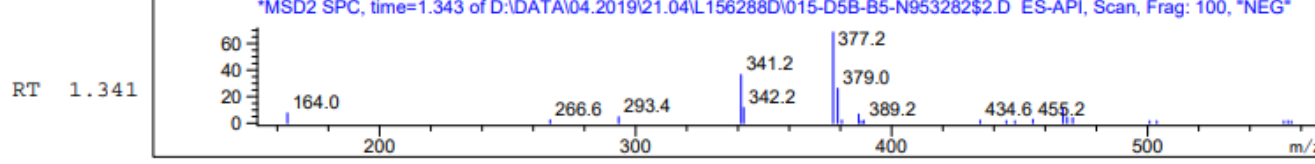

<sup>1</sup>H NMR spectrum of Z2295310789

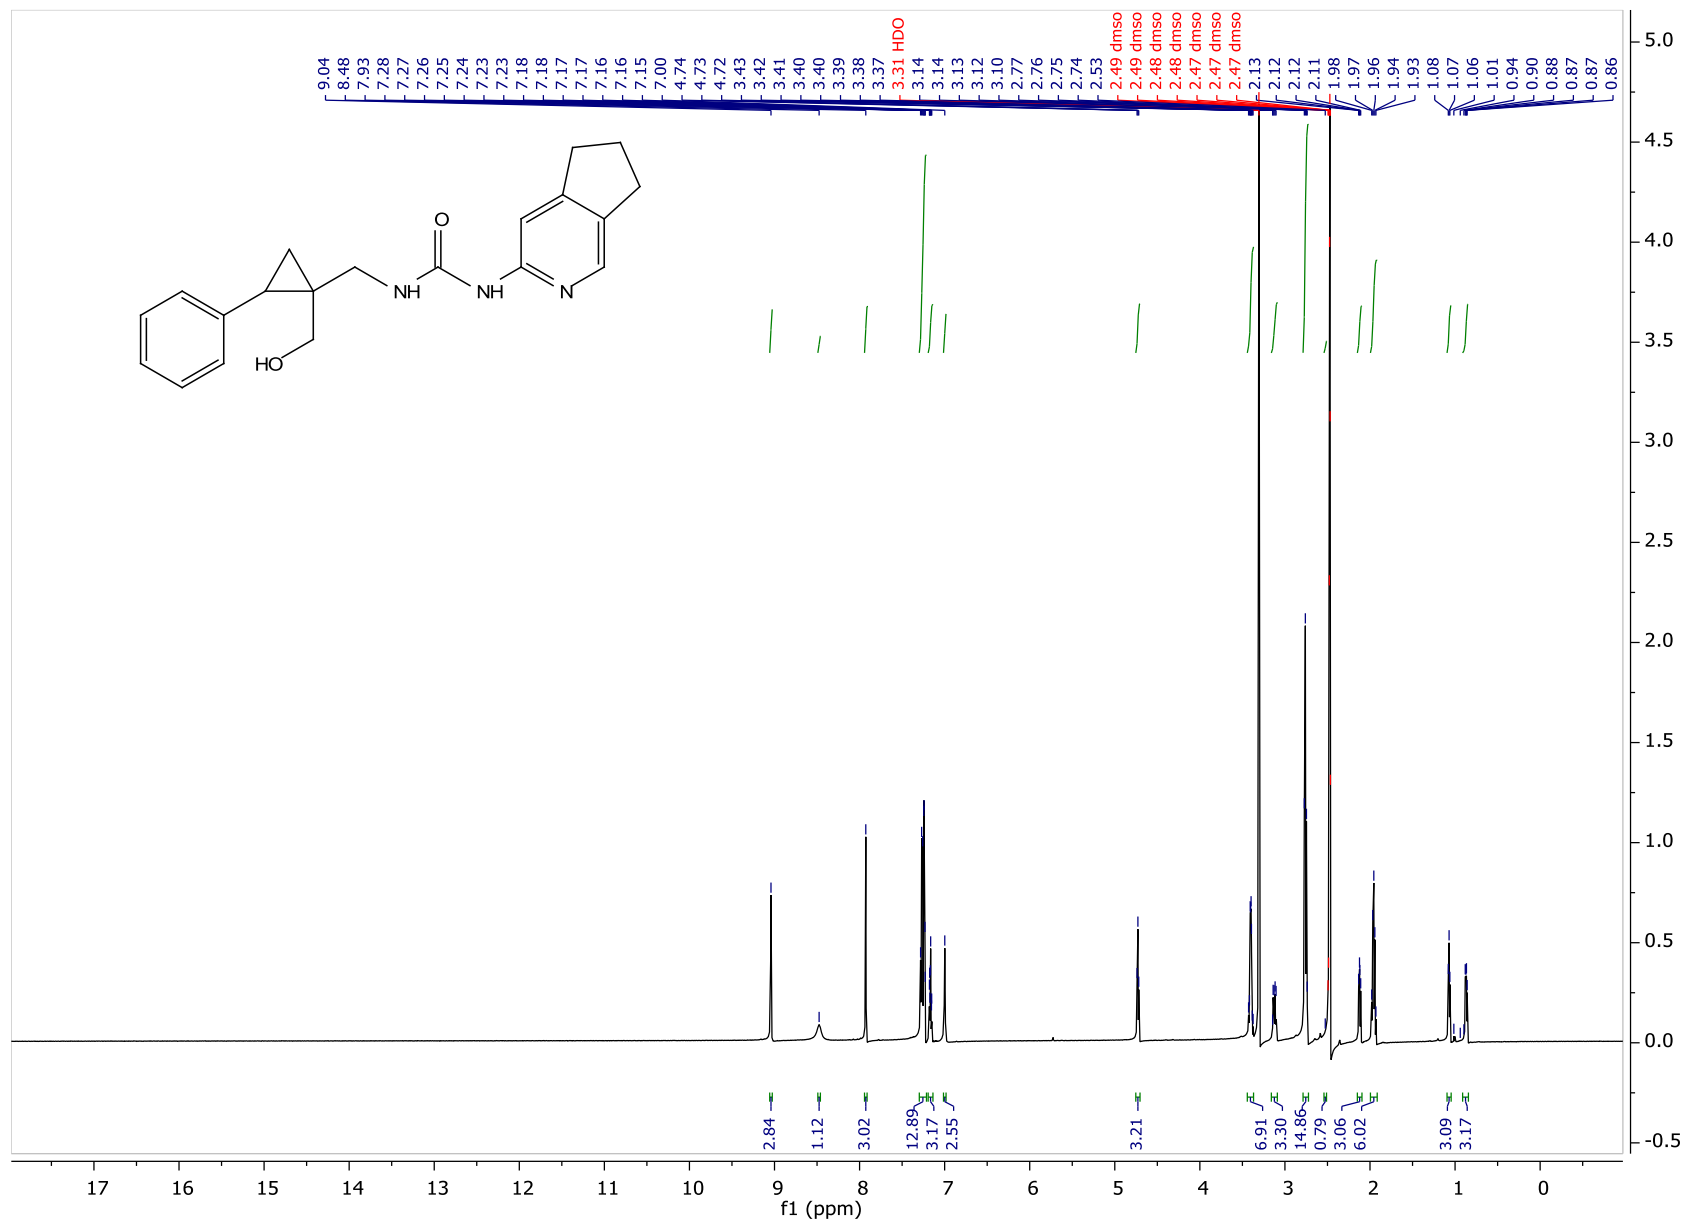

<sup>13</sup>C NMR spectrum of Z2295310789

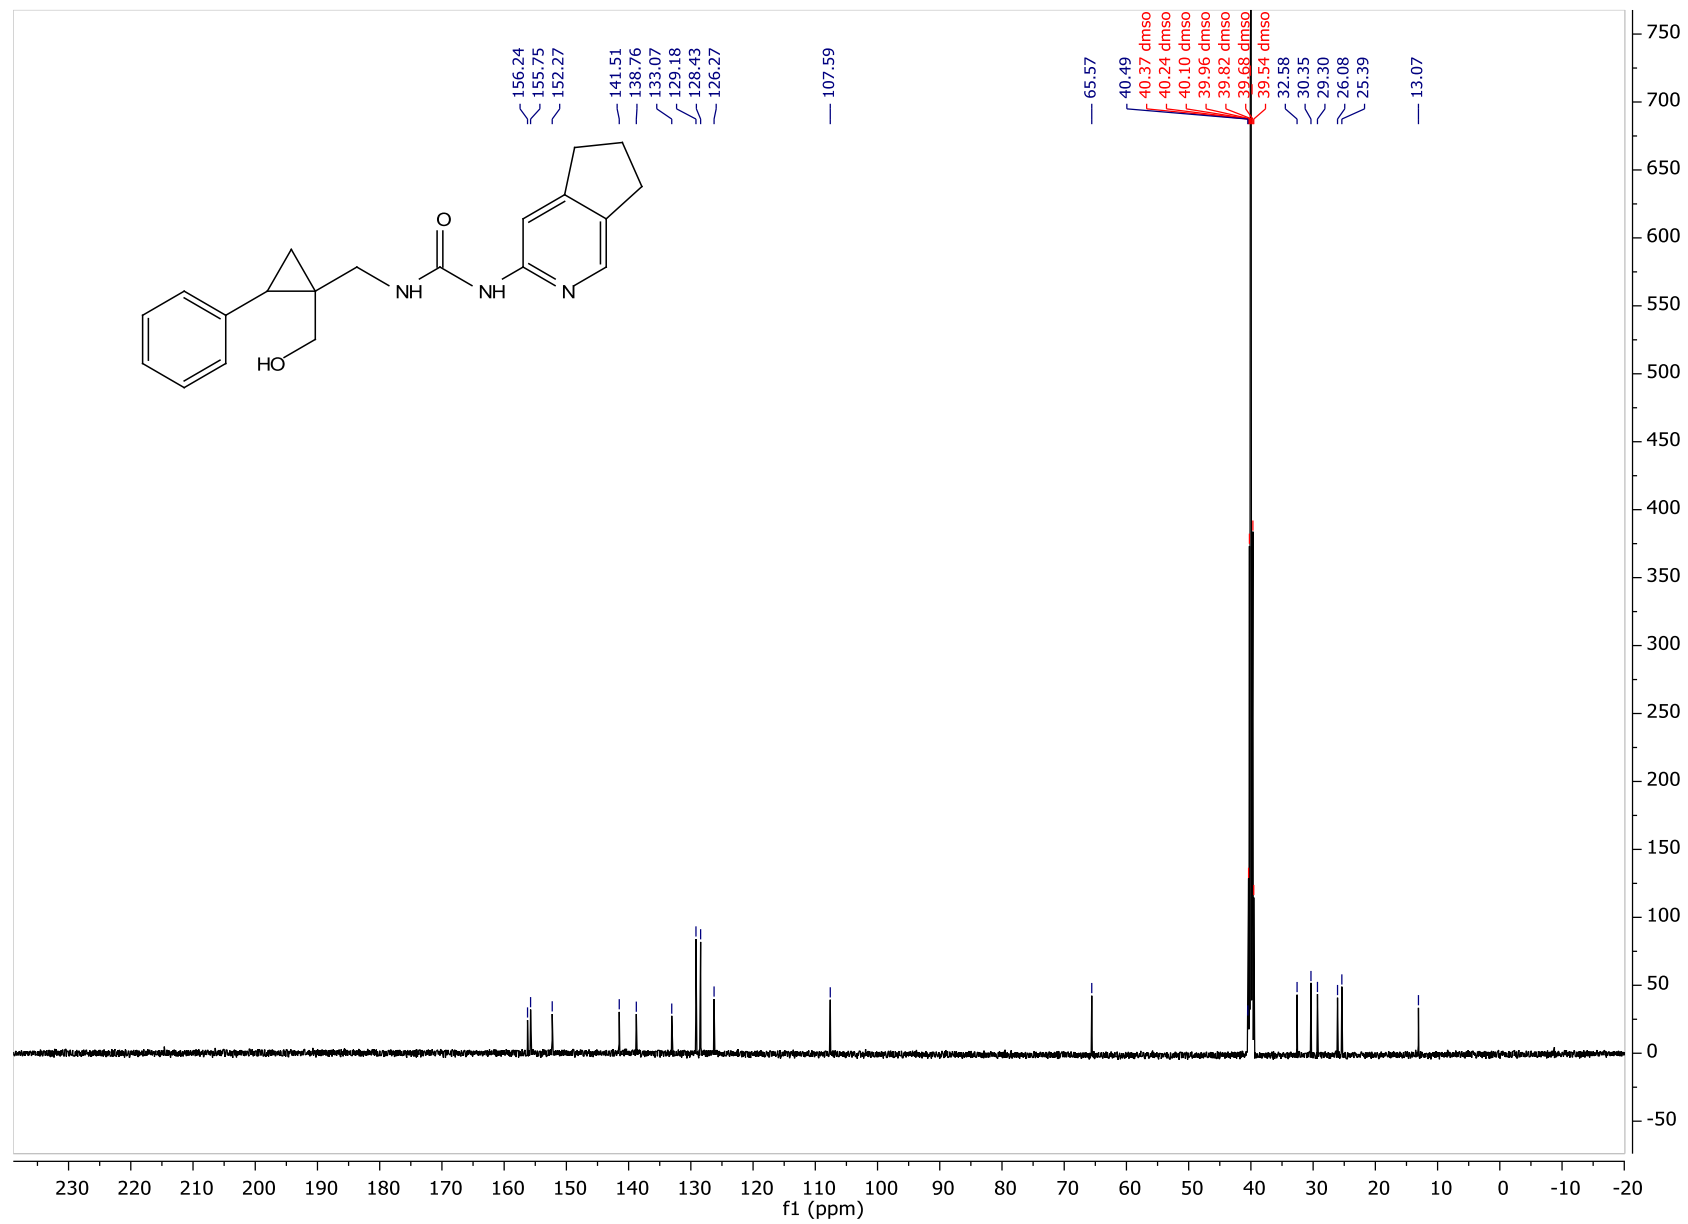

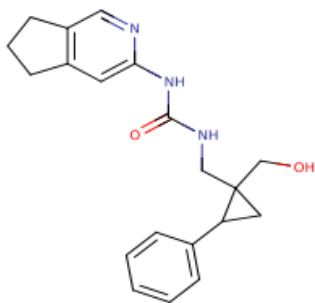

**Mol Wt** 337.42  
**Exact Mass** 337.21

| # | Time  | Area%  |
|---|-------|--------|
| 1 | 0.972 | 100.00 |

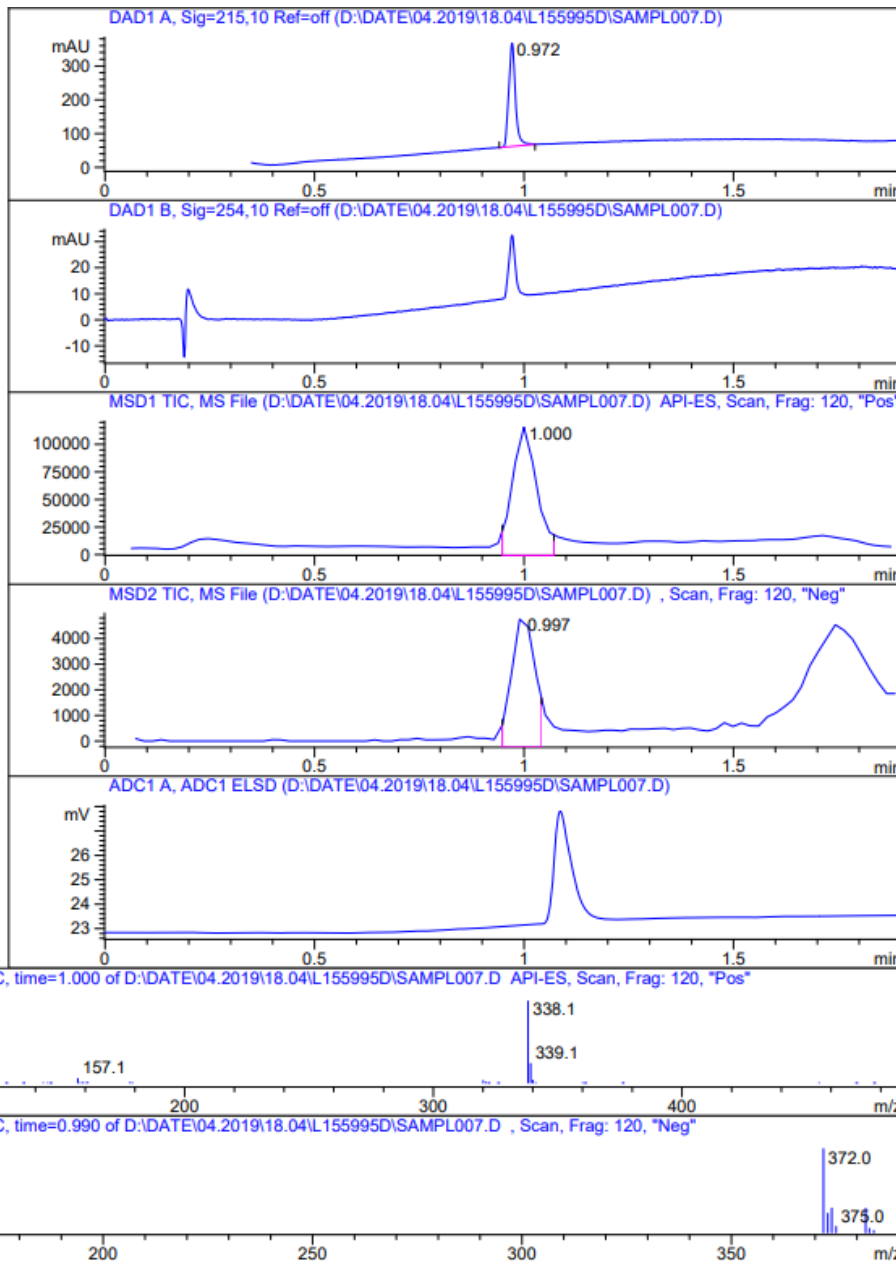

<sup>1</sup>H NMR spectrum of Z2350120658

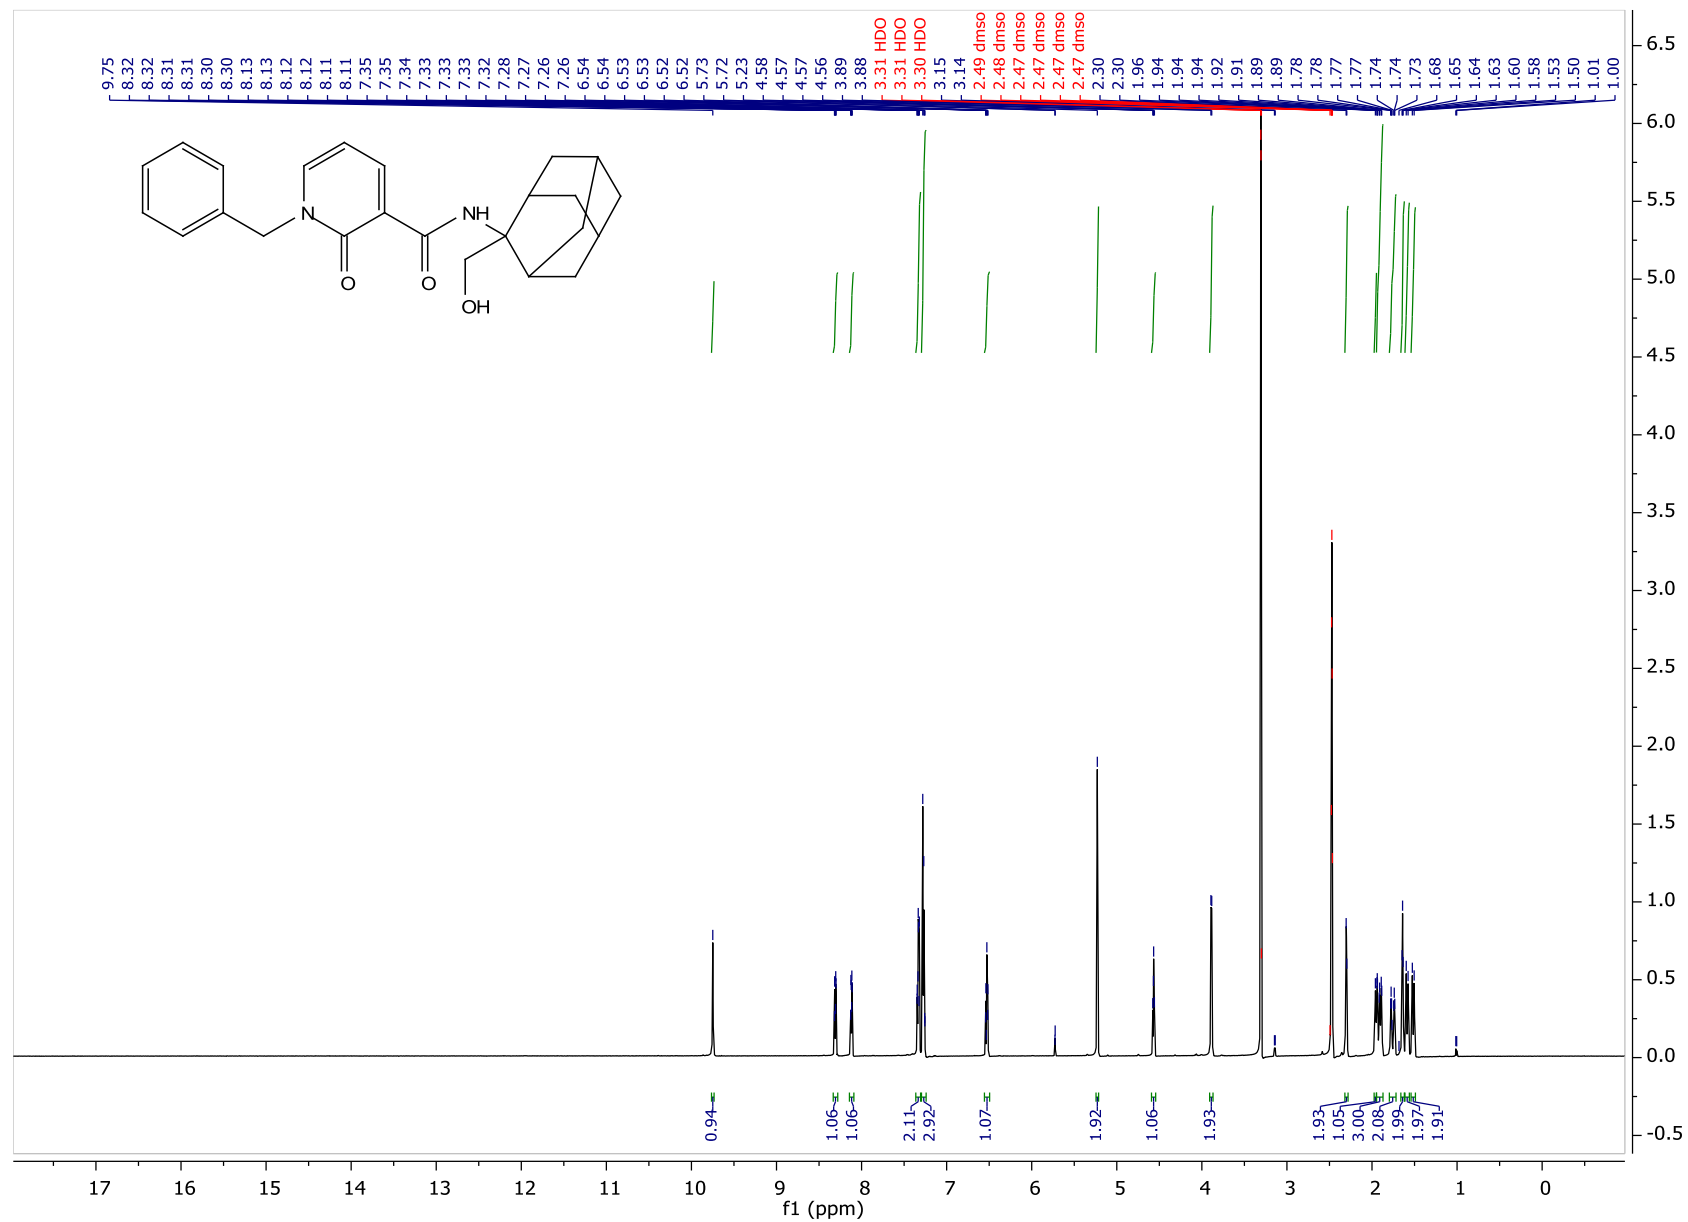

<sup>13</sup>C NMR spectrum of Z2350120658

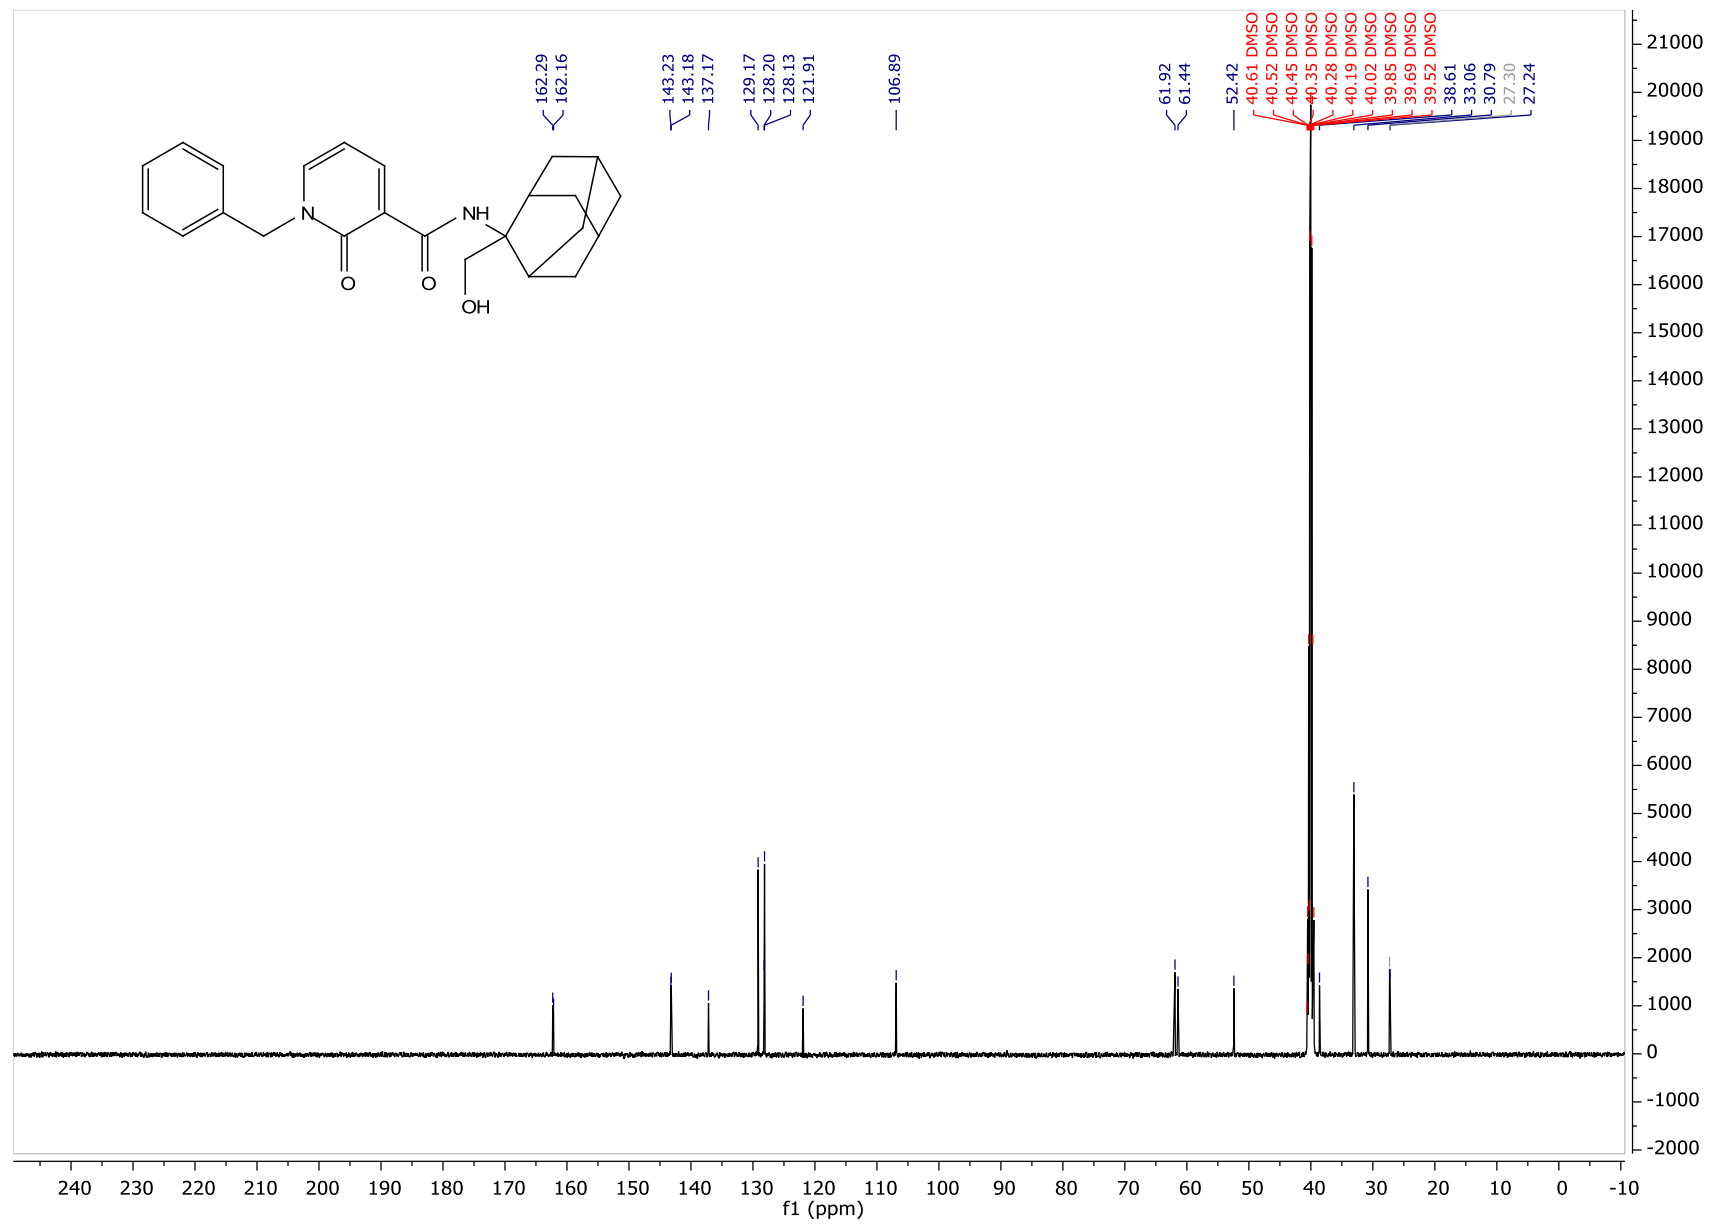



LC/MS spectrum of Z2350120658

Ret\_Time: 1.408 min

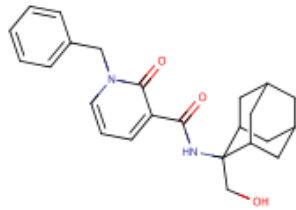

Mol Wt 392.49  
Exact Mass 392.25

| # | Time  | Area%  |
|---|-------|--------|
| 1 | 1.408 | 100.00 |

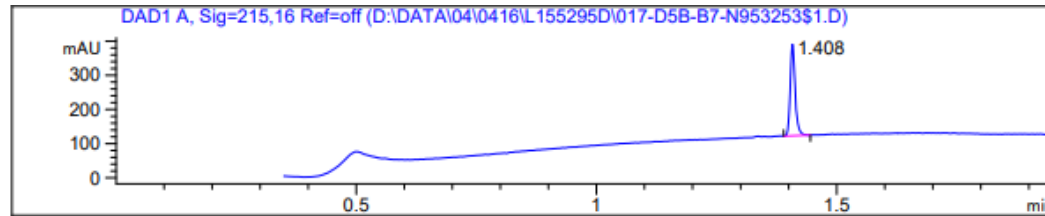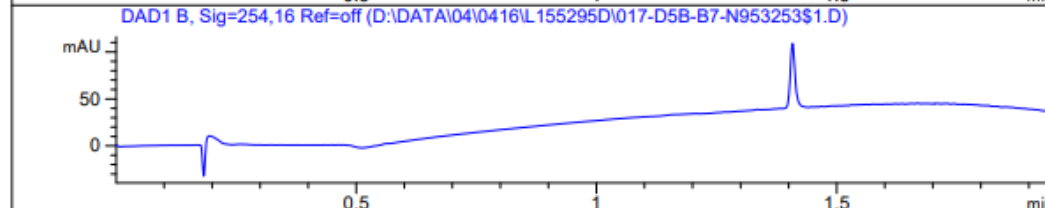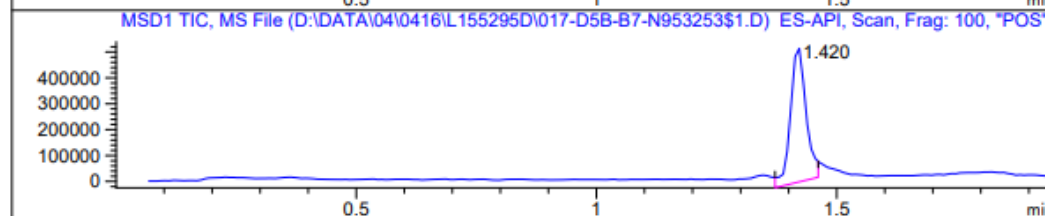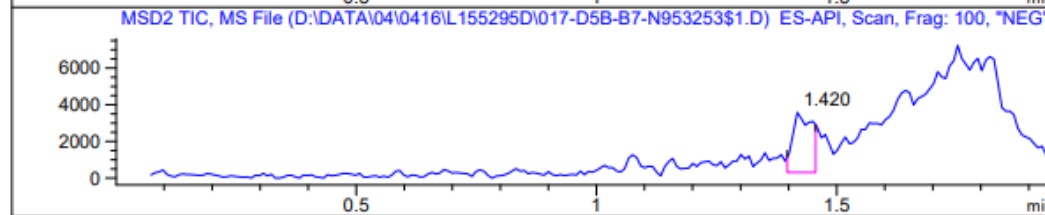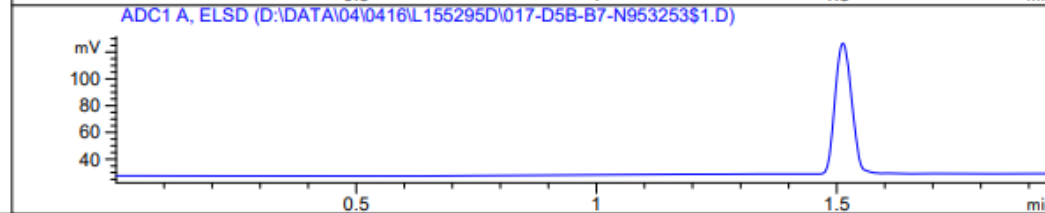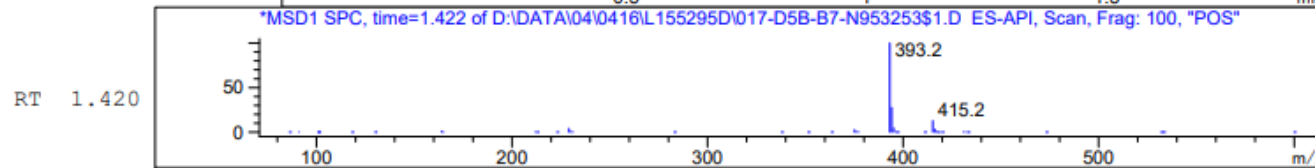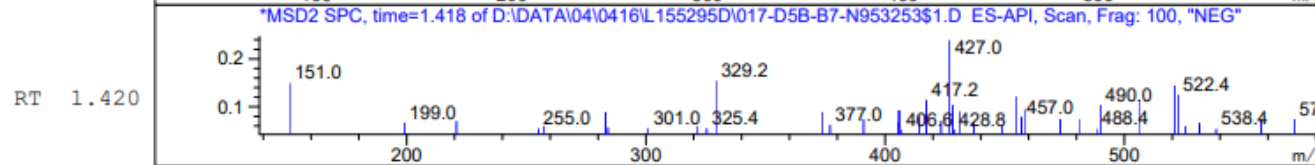

<sup>1</sup>H NMR spectrum of Z2370574710

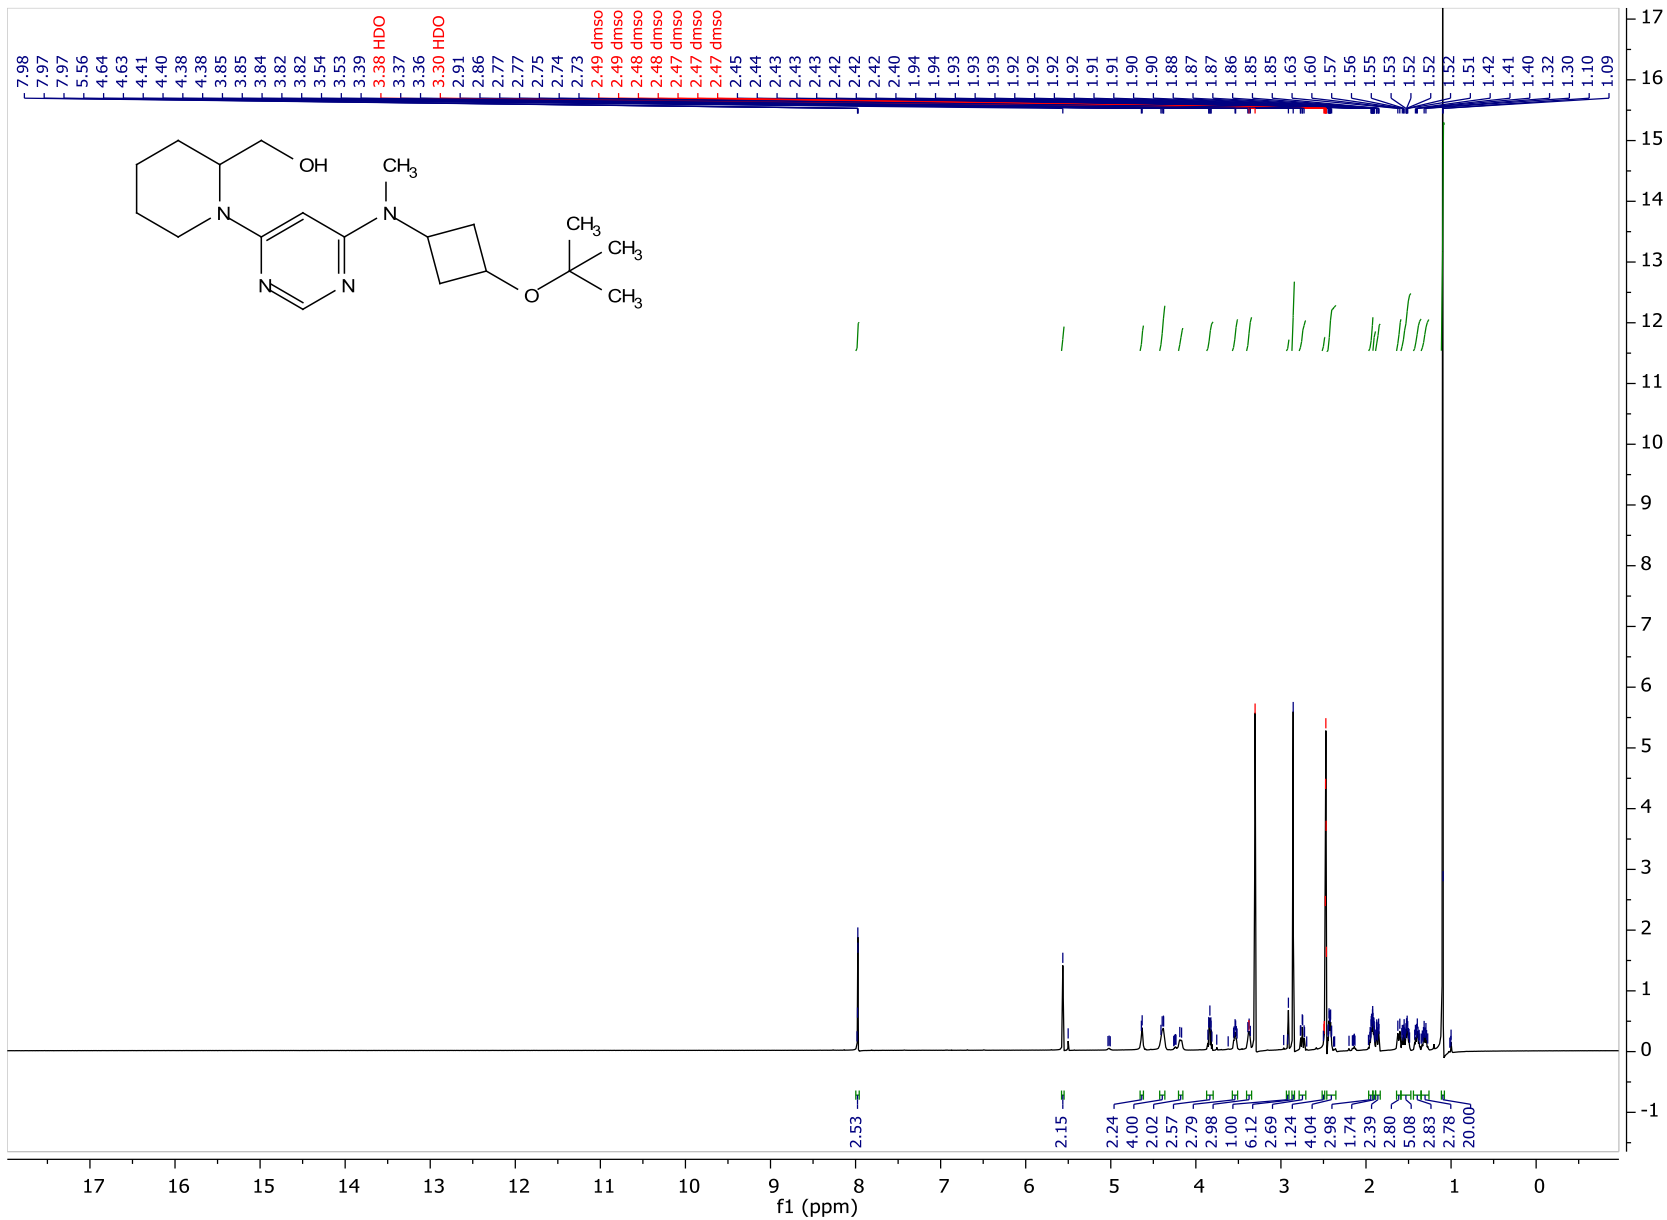

<sup>13</sup>C NMR spectrum of Z2370574710

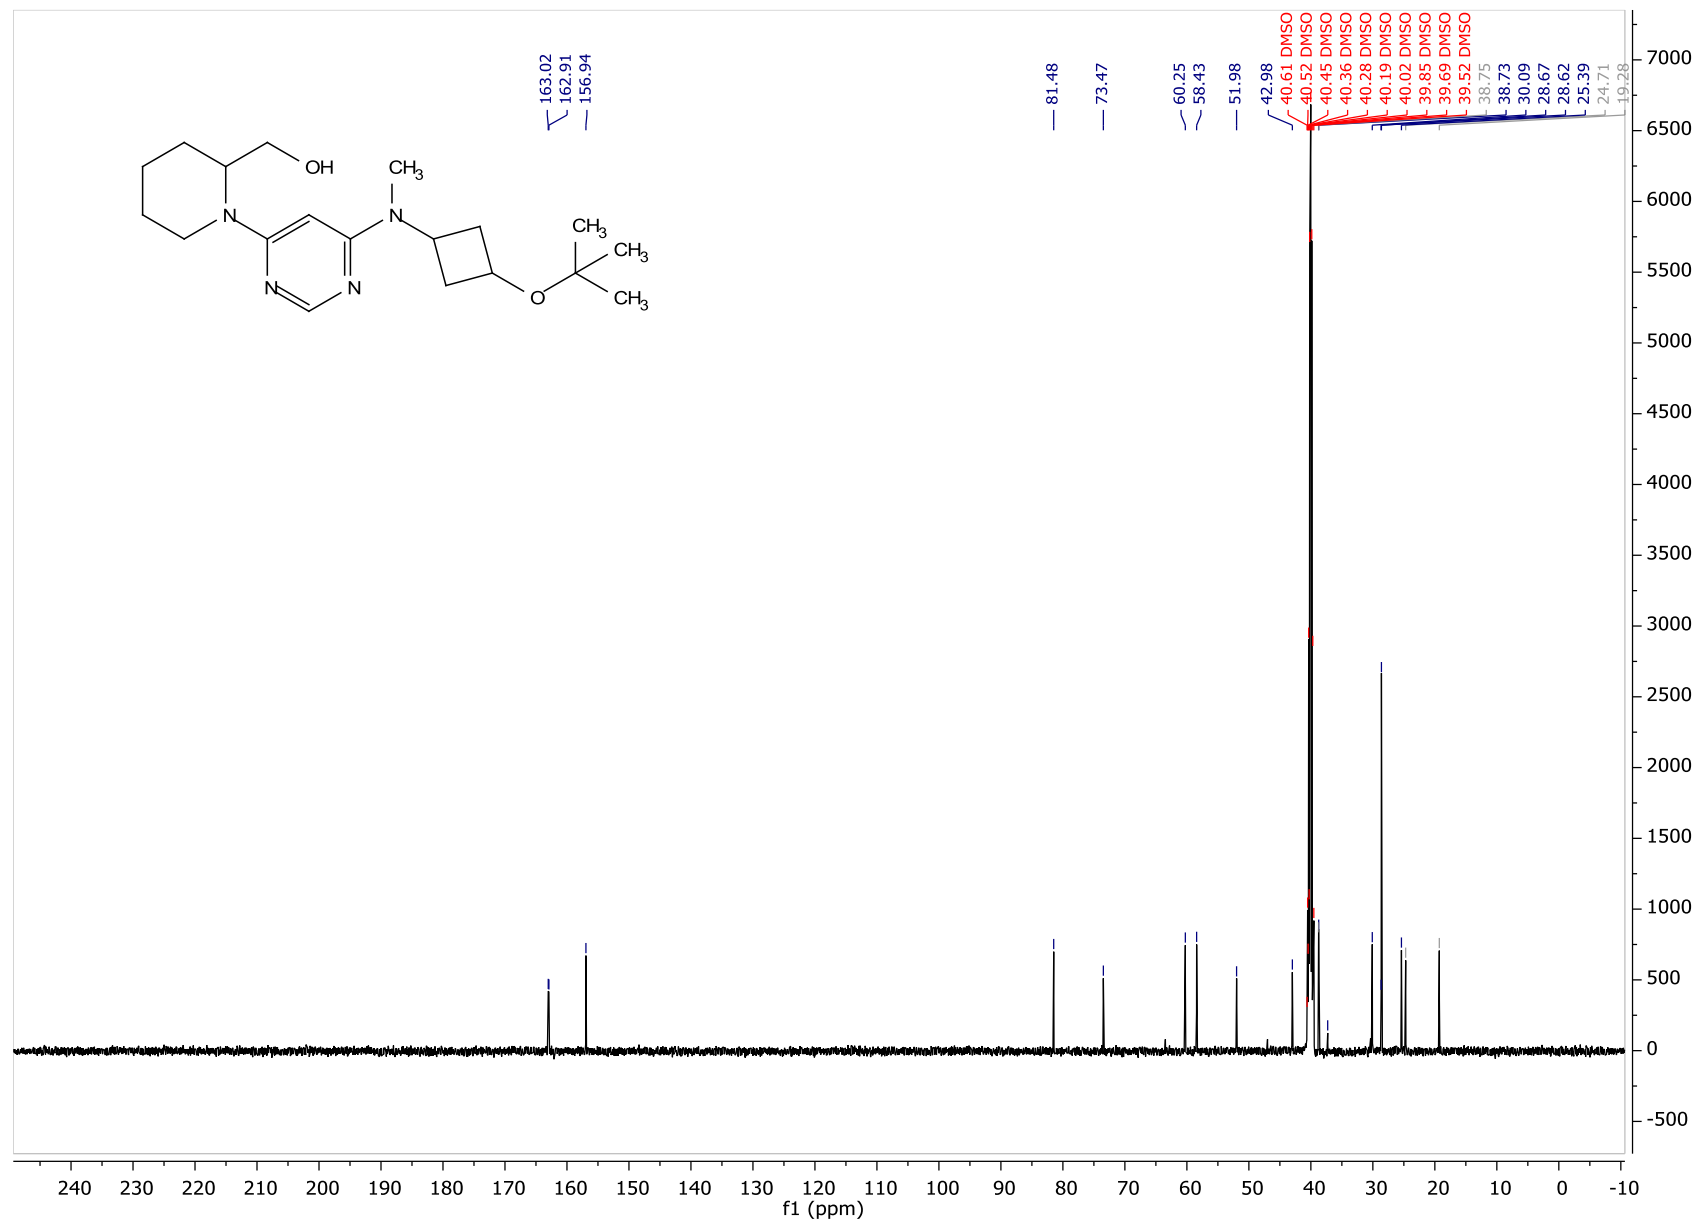

LC/MS spectrum of Z2370574710

Ret\_Time: 1.047 min

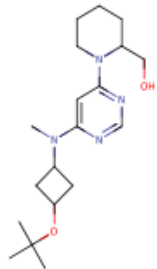

Mol Wt 348.48  
Exact Mass 348.3

| # | Time  | Area% |
|---|-------|-------|
| 1 | 0.999 | 2.78  |
| 2 | 1.047 | 97.22 |

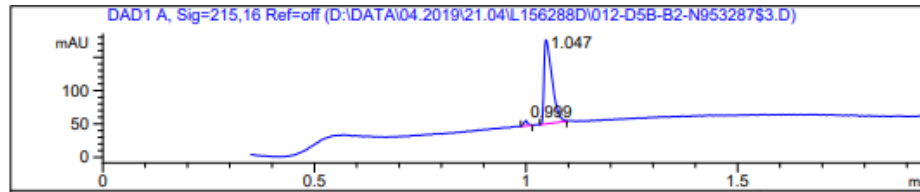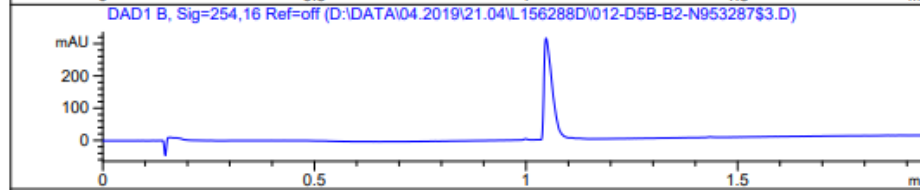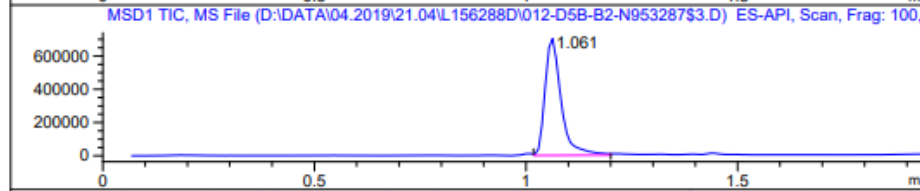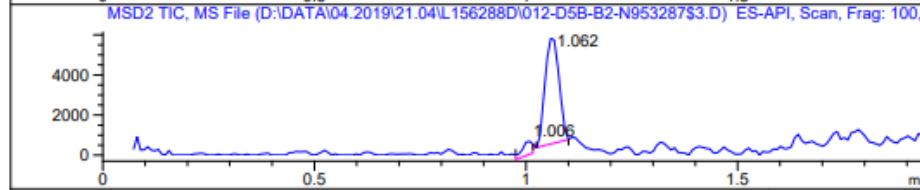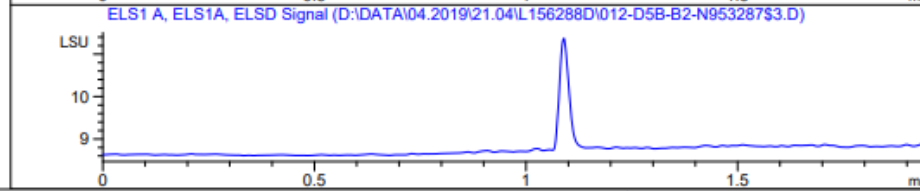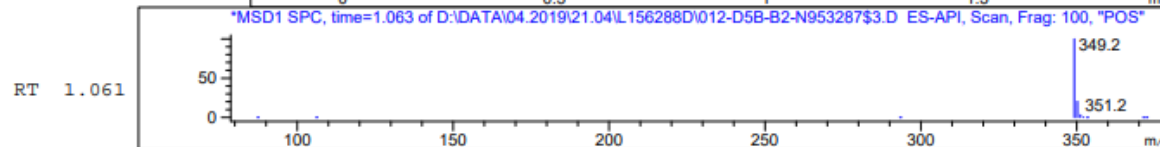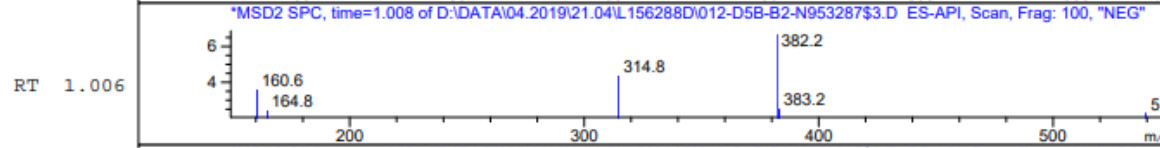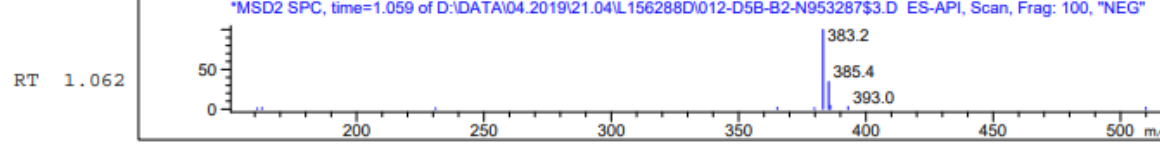

<sup>1</sup>H NMR spectrum of Z4121492004

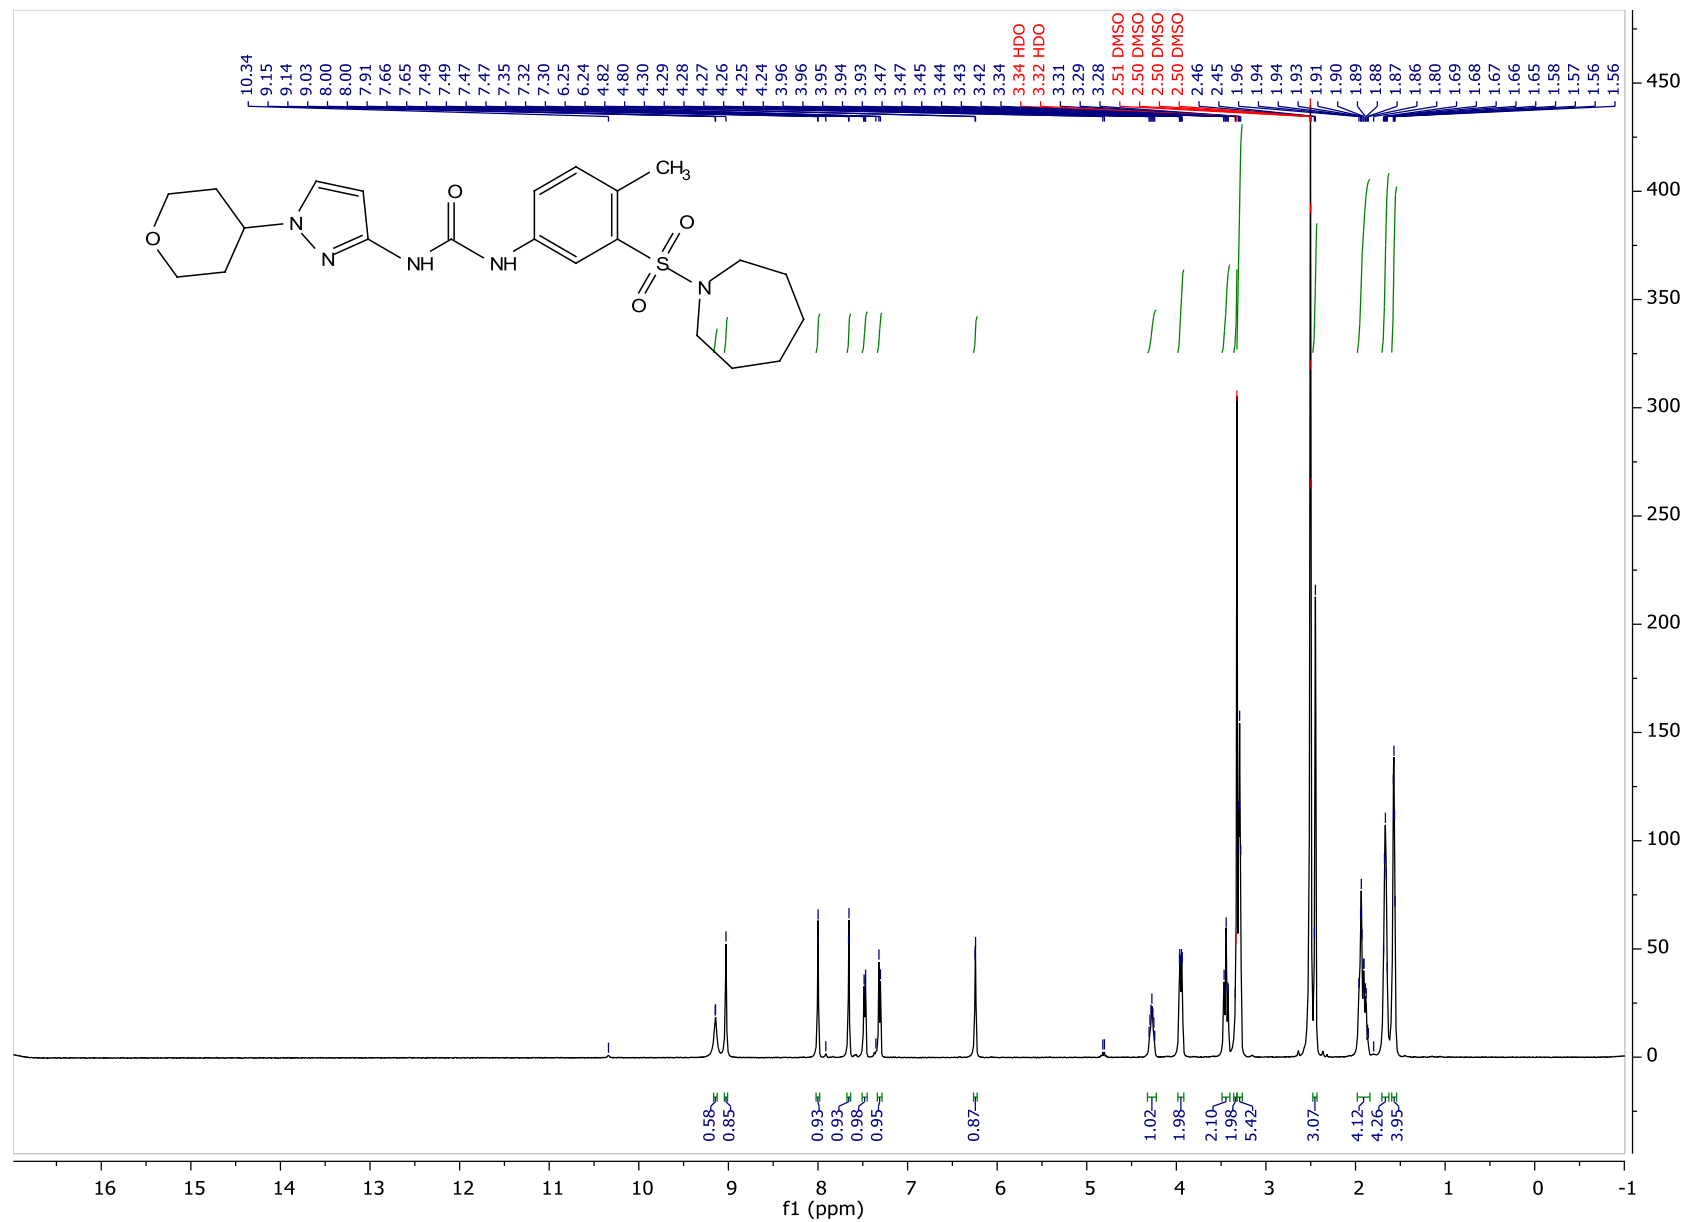

<sup>13</sup>C NMR spectrum of Z4121492004

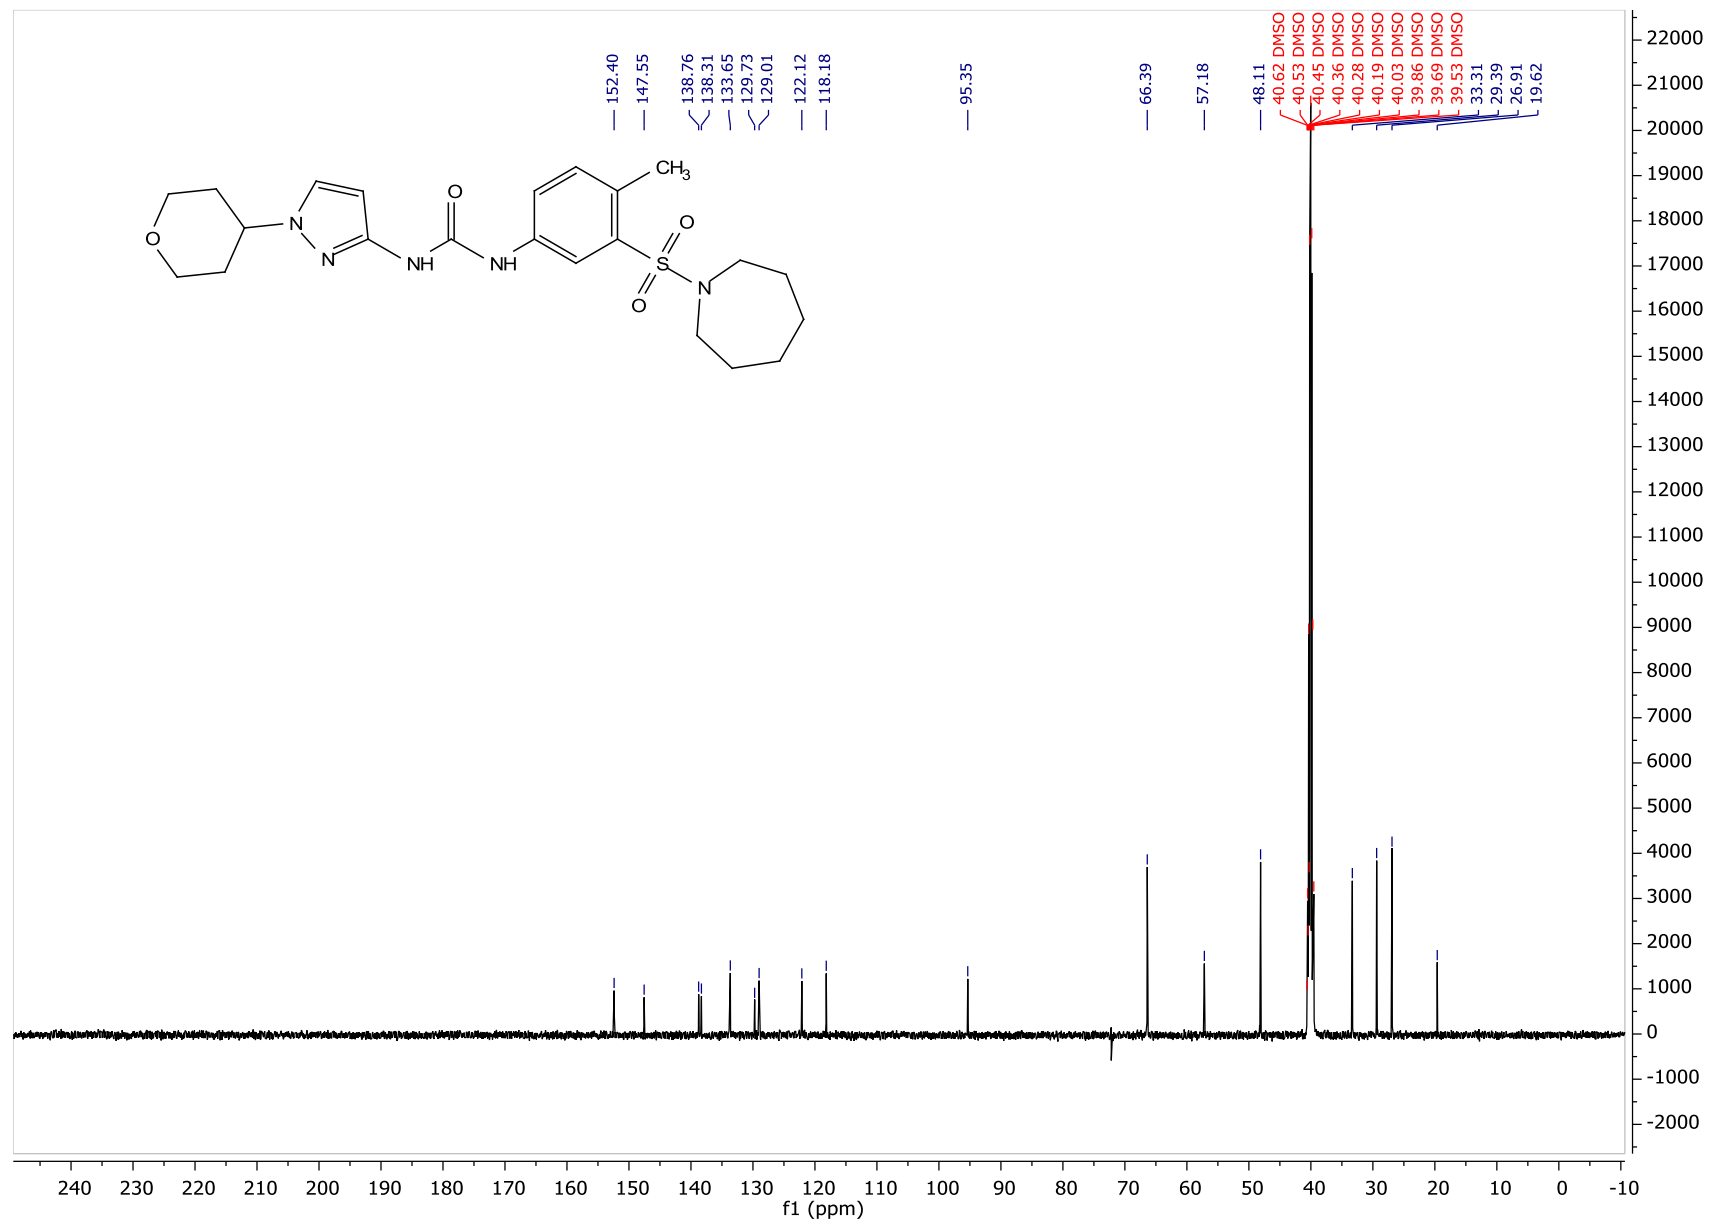

Ret\_Time: 1.430 min

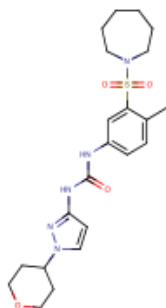

**Mol Wt** 461.58  
**Exact Mass** 461.24

| # | Time  | Area%  |
|---|-------|--------|
| 1 | 1.430 | 100.00 |

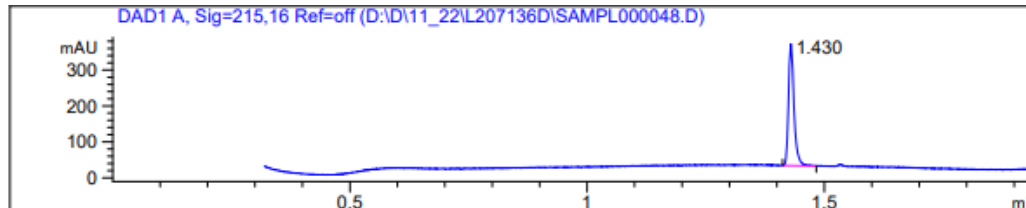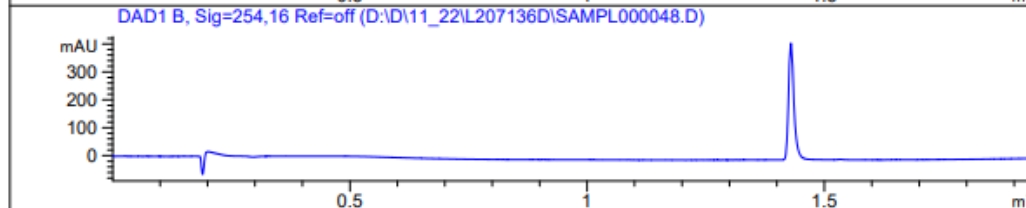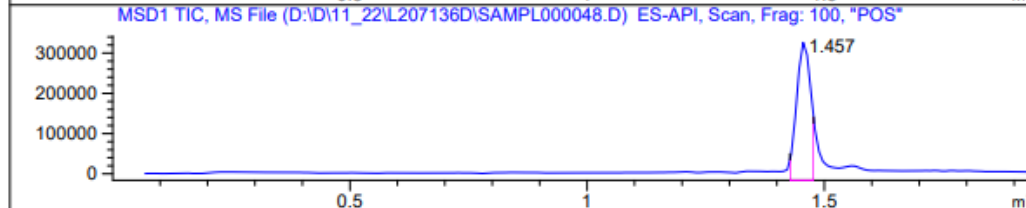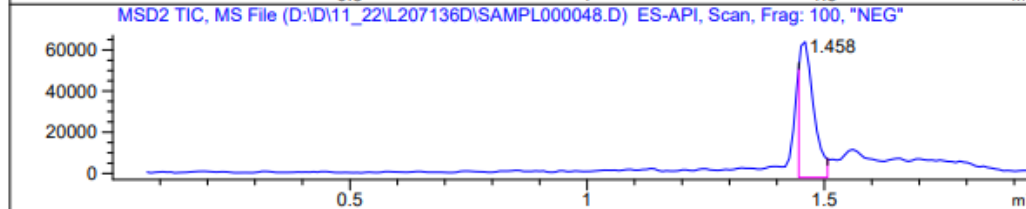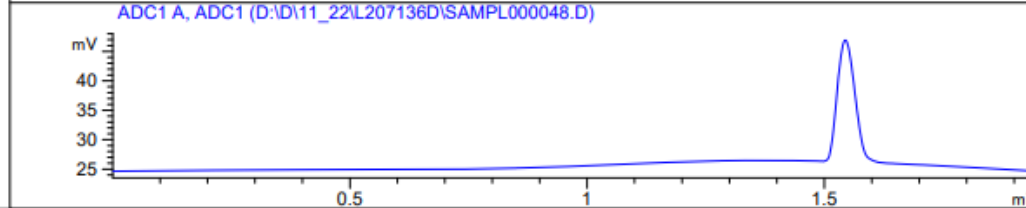

RT 1.457

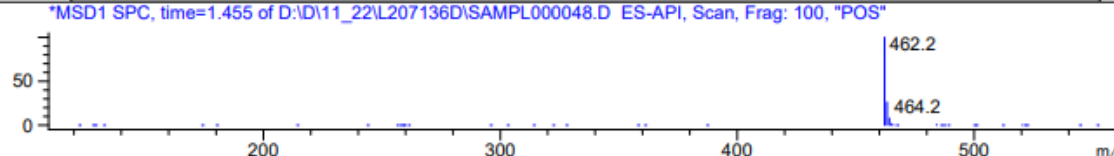

RT 1.458

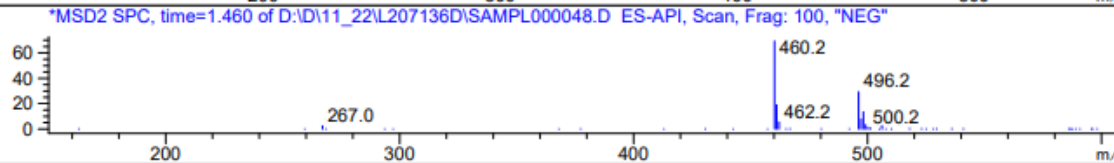

<sup>1</sup>H NMR spectrum of Z4121492019

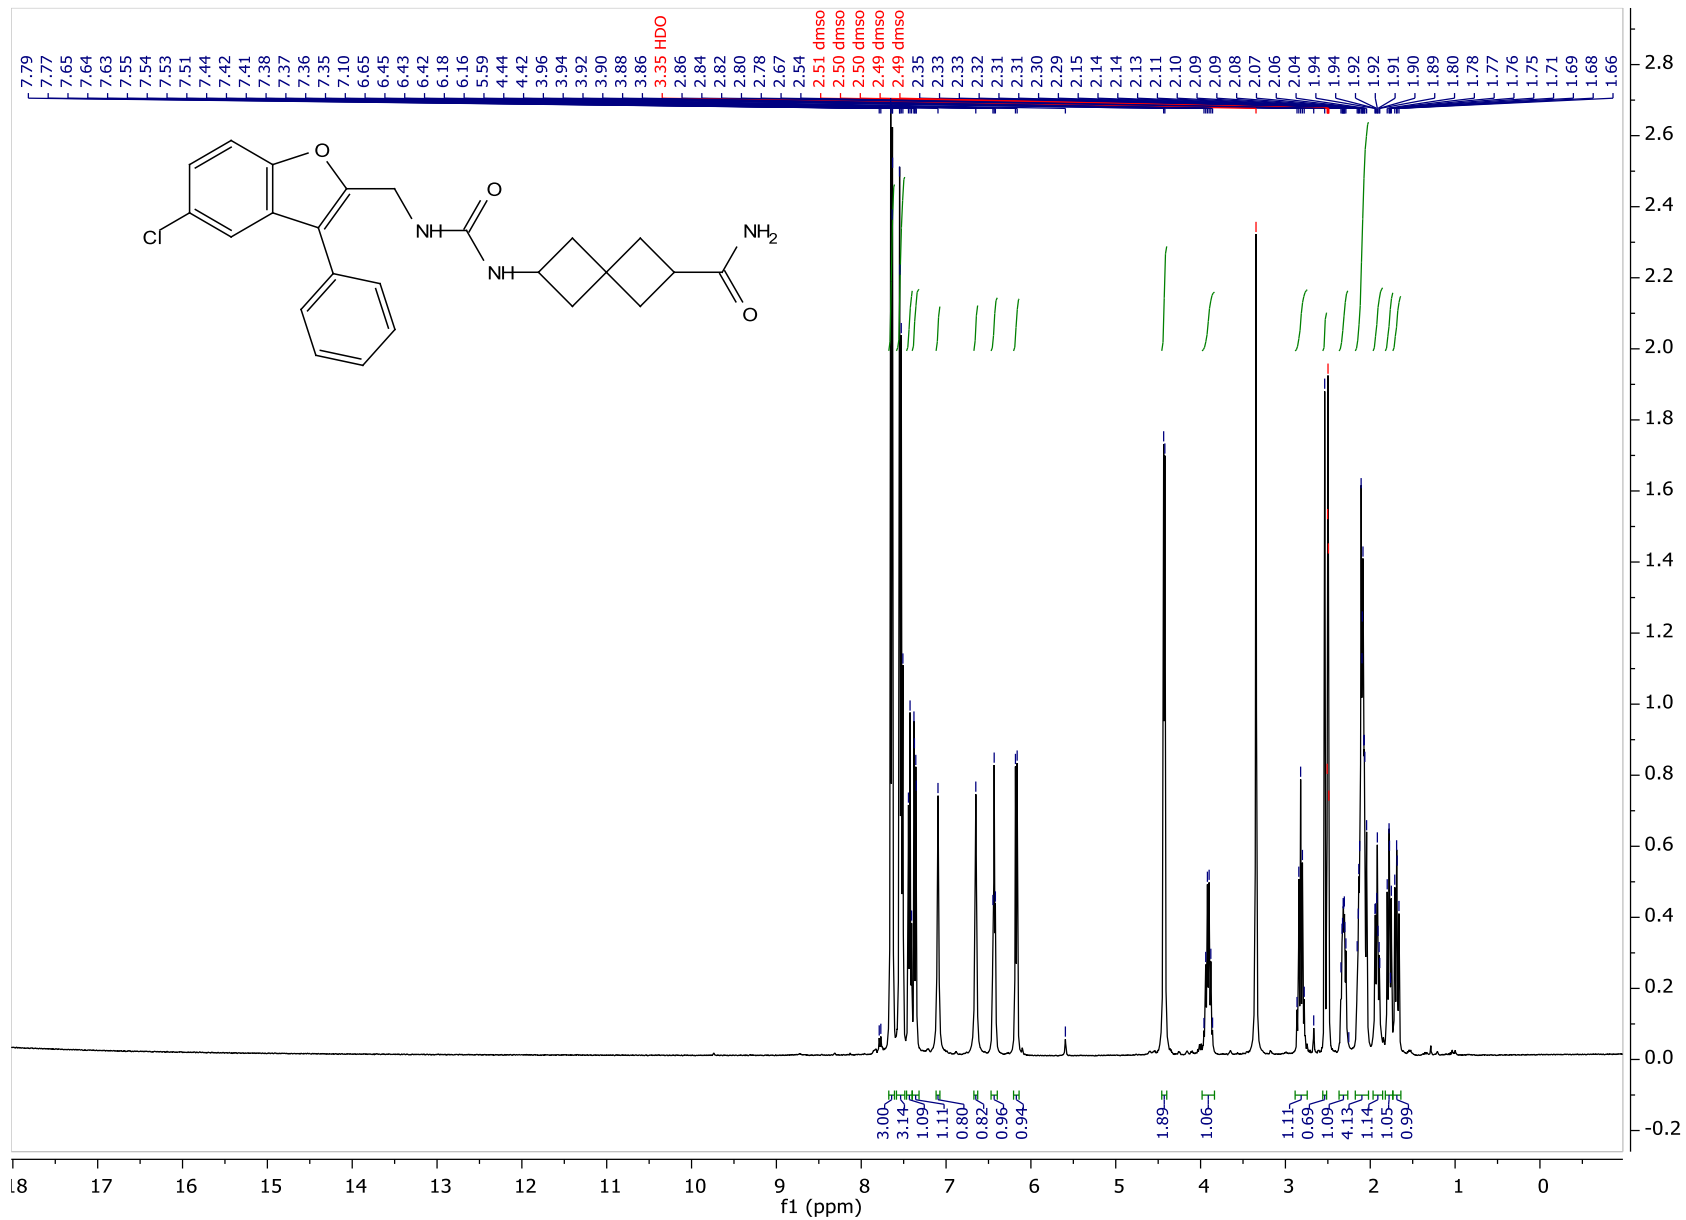



<sup>13</sup>C NMR spectrum of Z4121492019

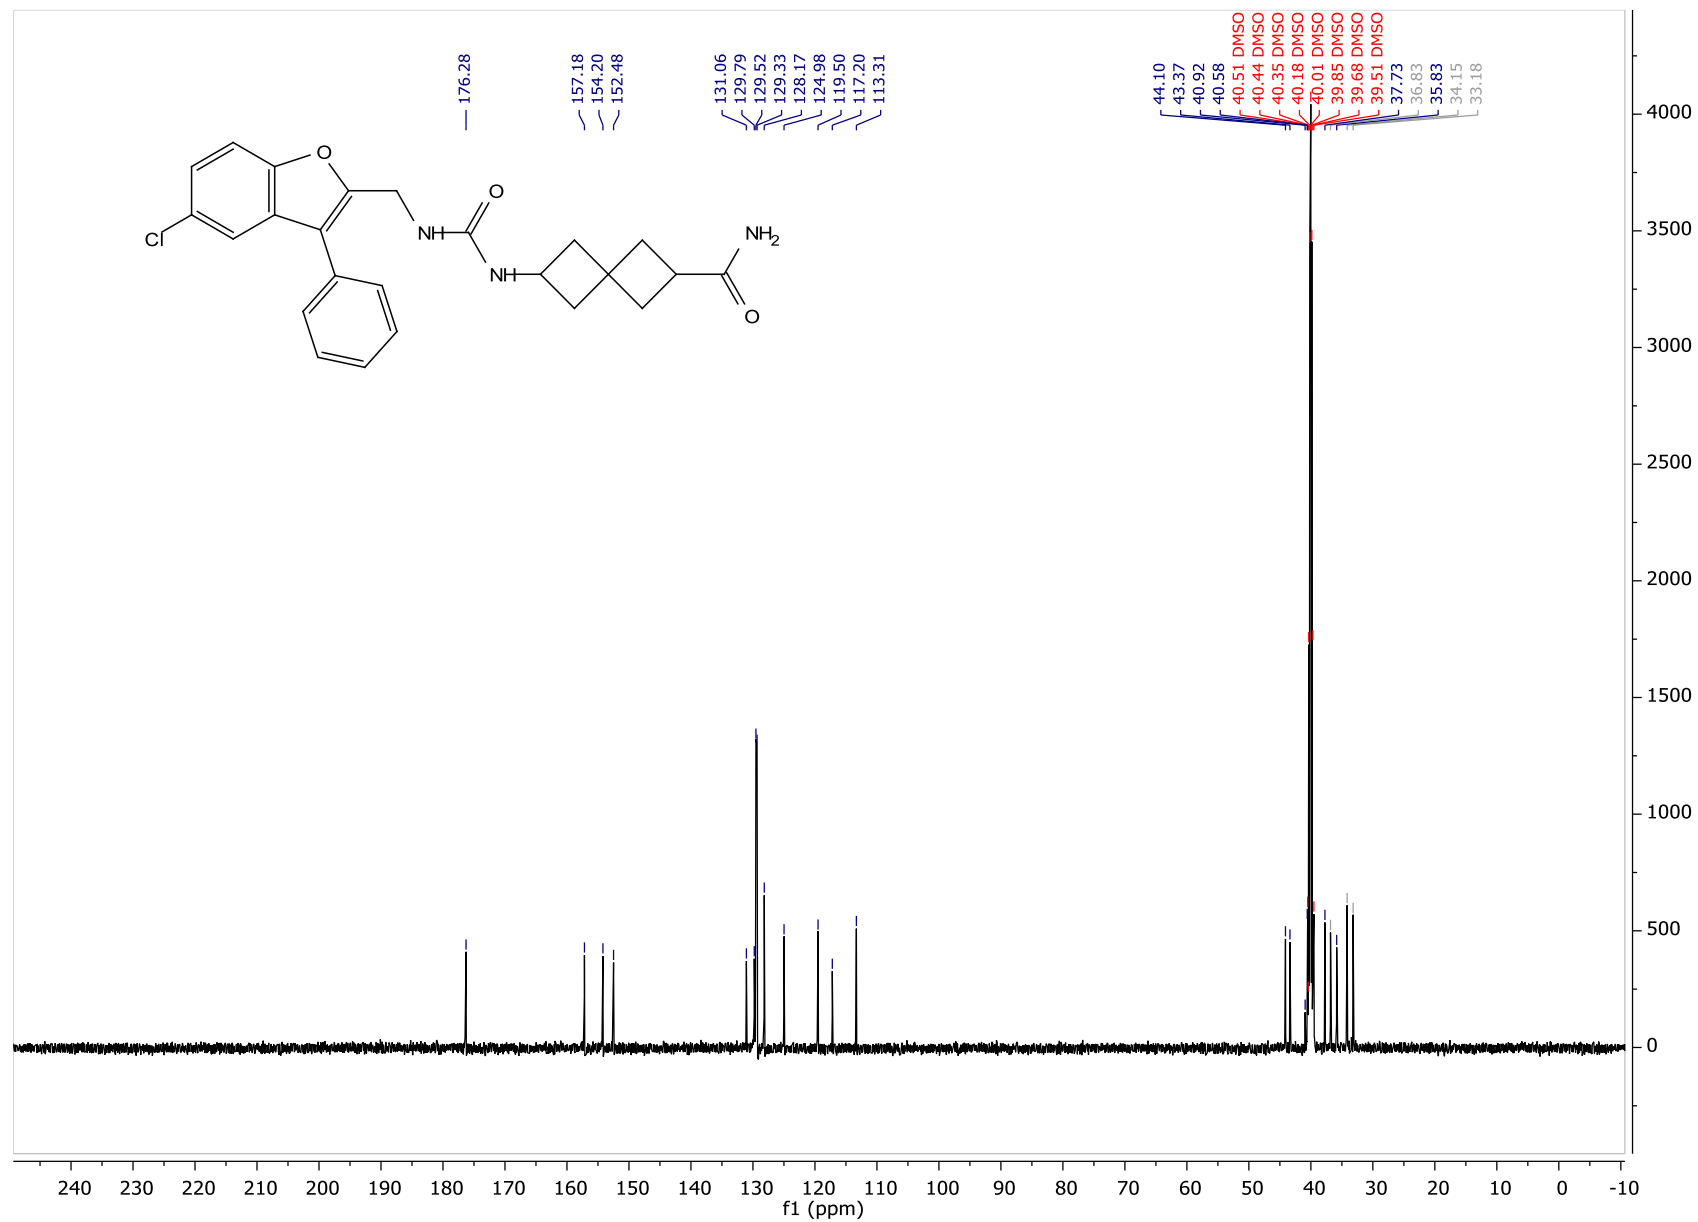

LC/MS spectrum of Z4121492019

Ret\_Time: 1.427 min

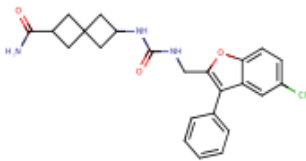

**Mol Wt** 437.92  
**Exact Mass** 437.18

| # | Time  | Area% |
|---|-------|-------|
| 1 | 1.427 | 92.56 |
| 2 | 1.455 | 7.44  |

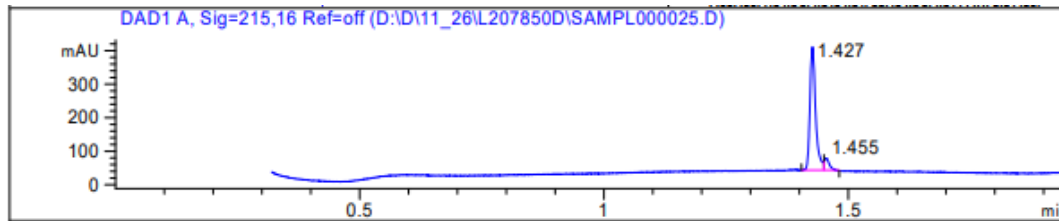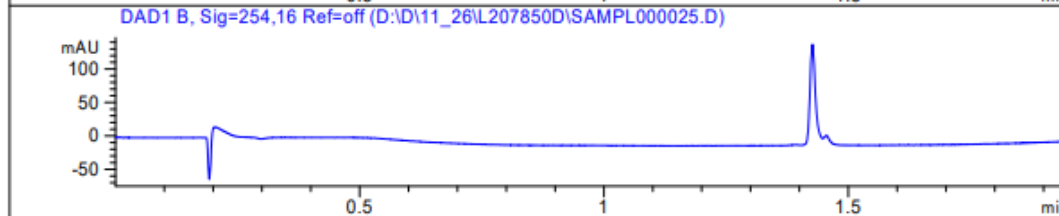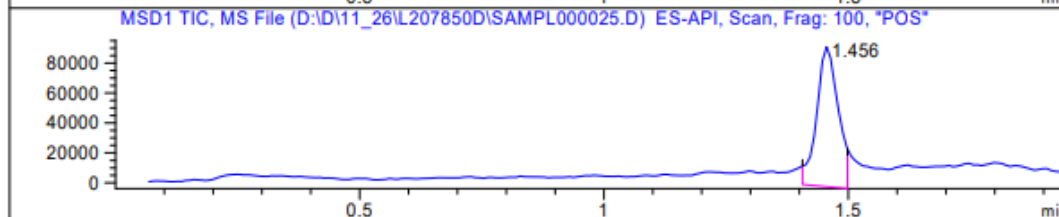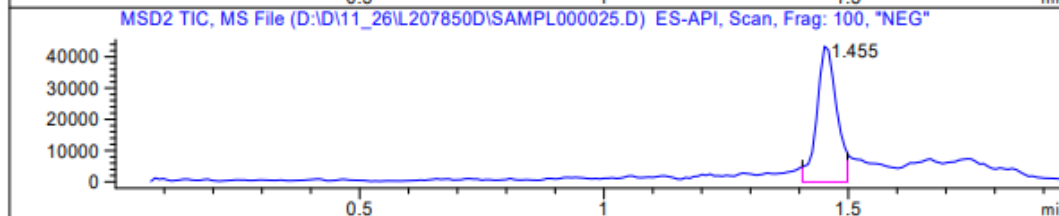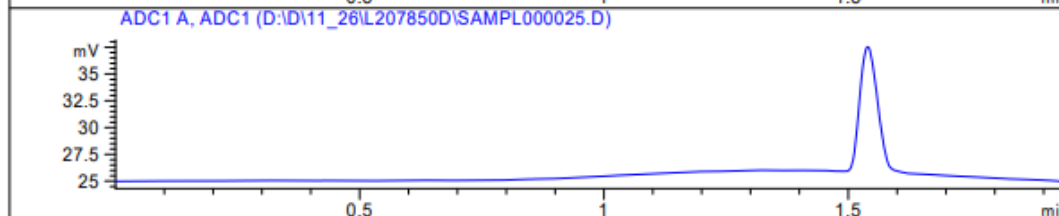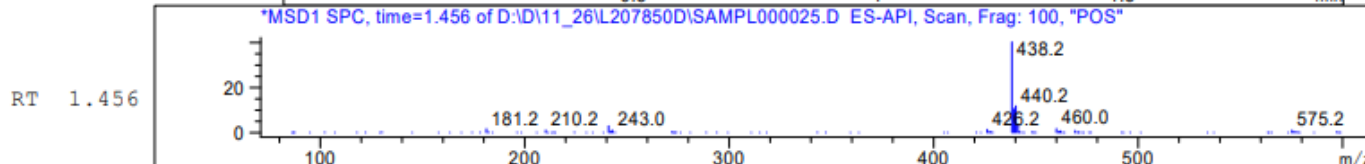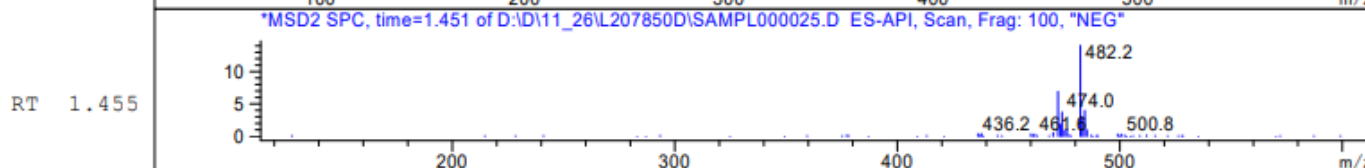

<sup>1</sup>H NMR spectrum of Z4121492020

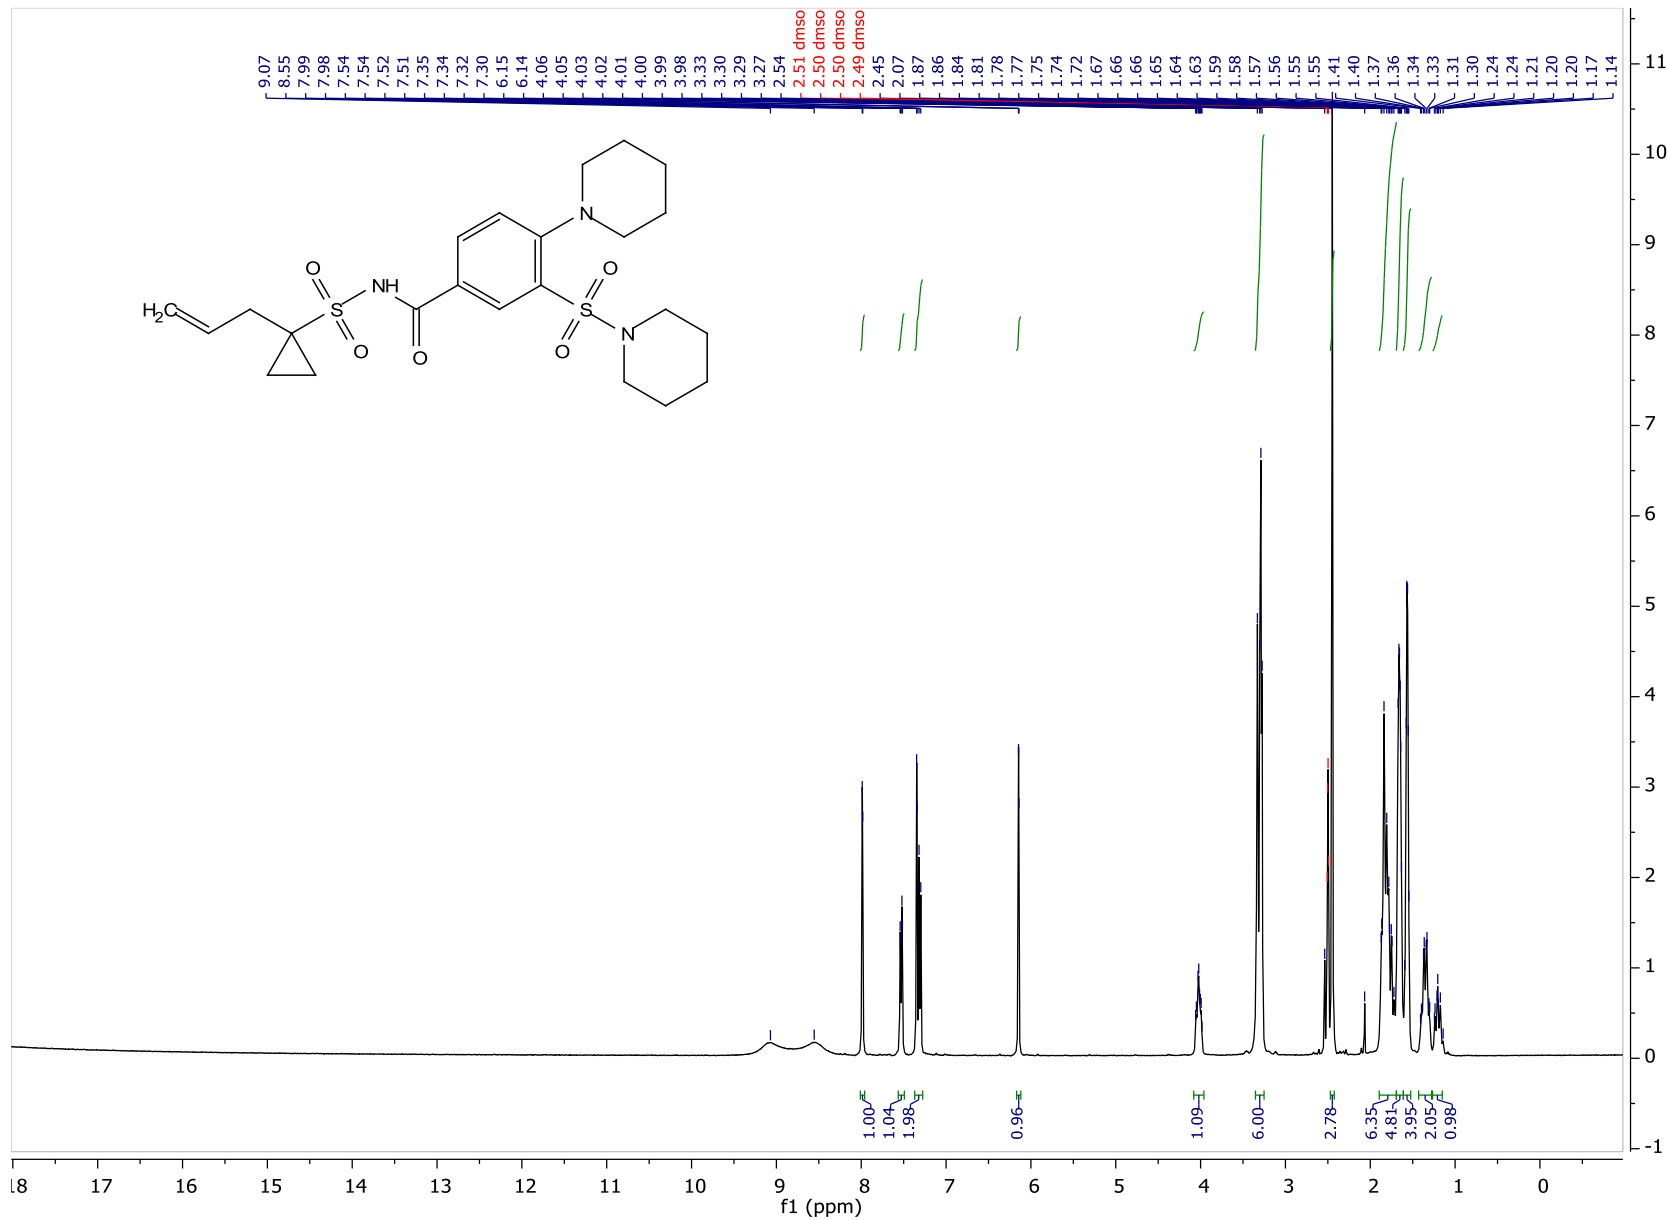

<sup>13</sup>C NMR spectrum of Z4121492020

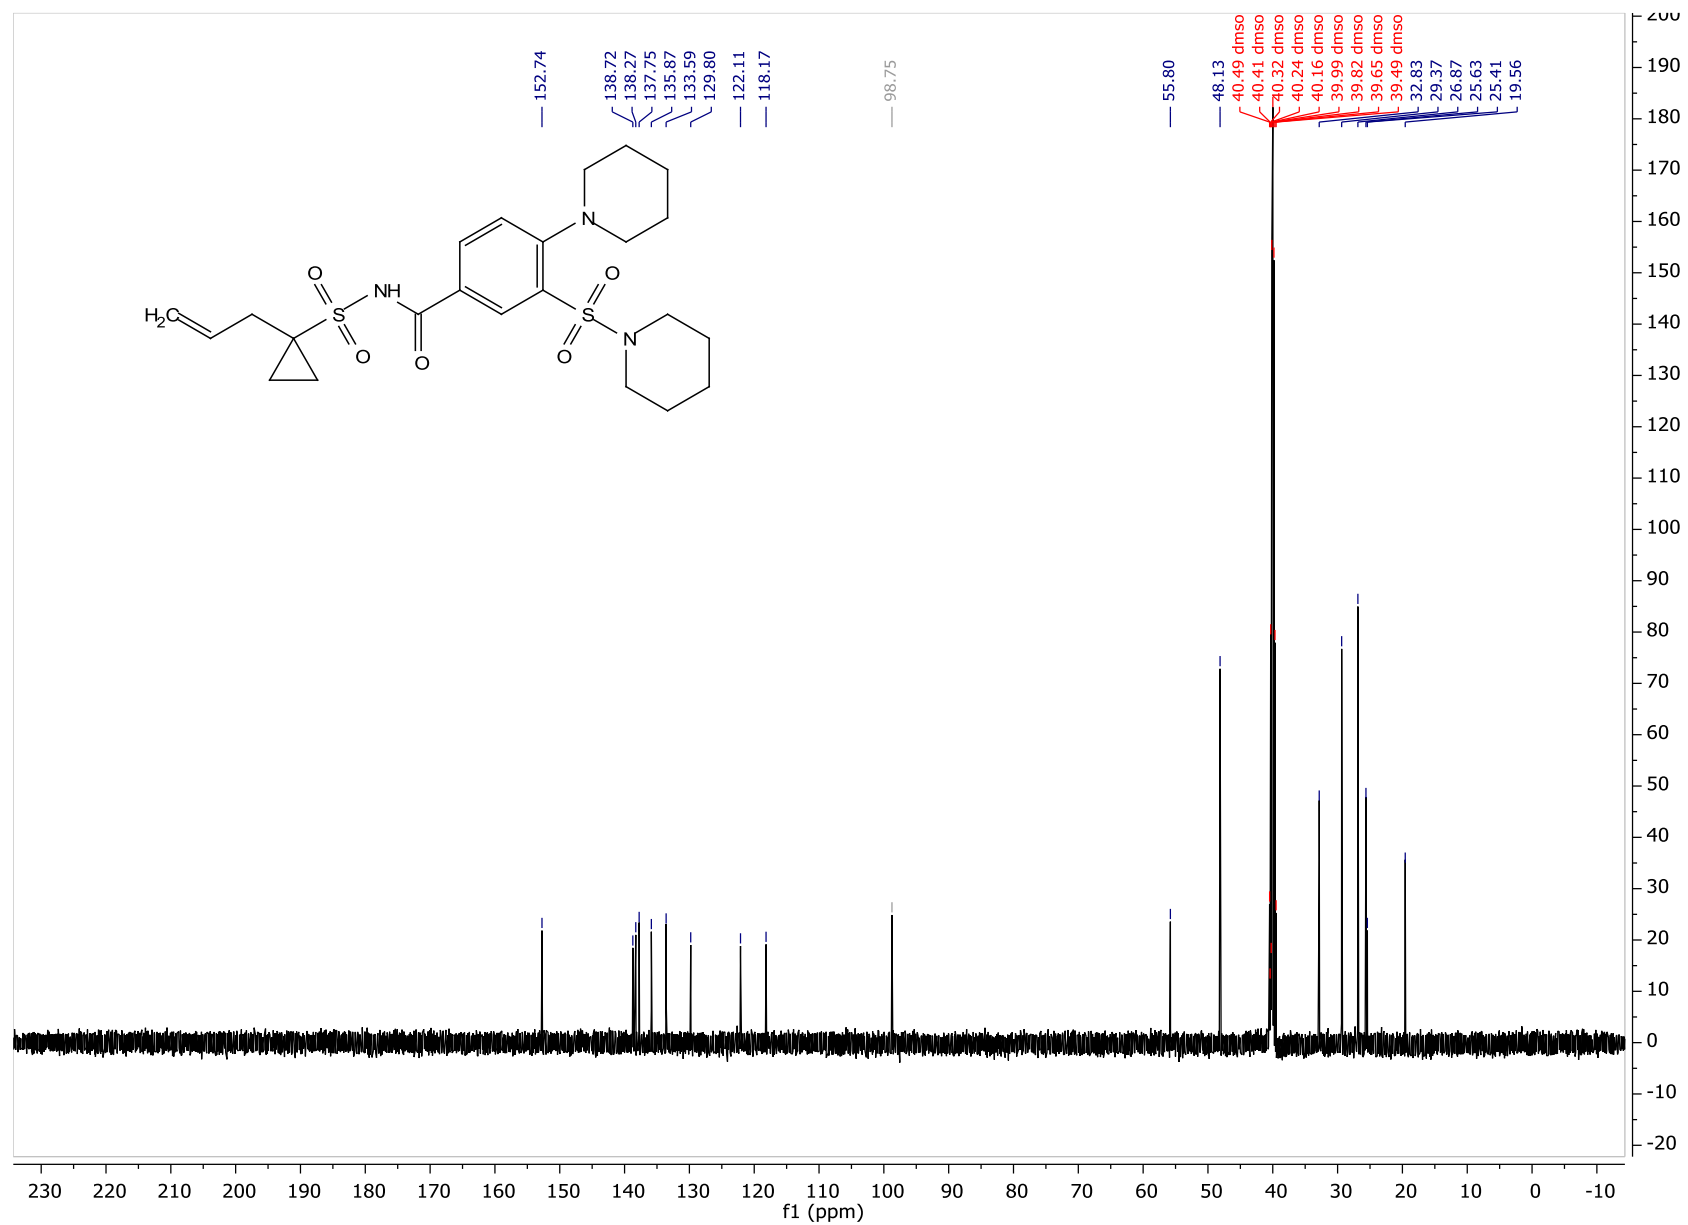

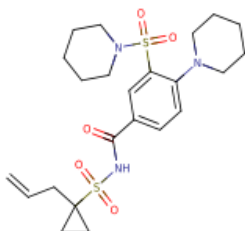

Mol Wt 495.66  
Exact Mass 495.22

| # | Time  | Area% |
|---|-------|-------|
| 1 | 1.595 | 9.87  |
| 2 | 1.630 | 90.13 |

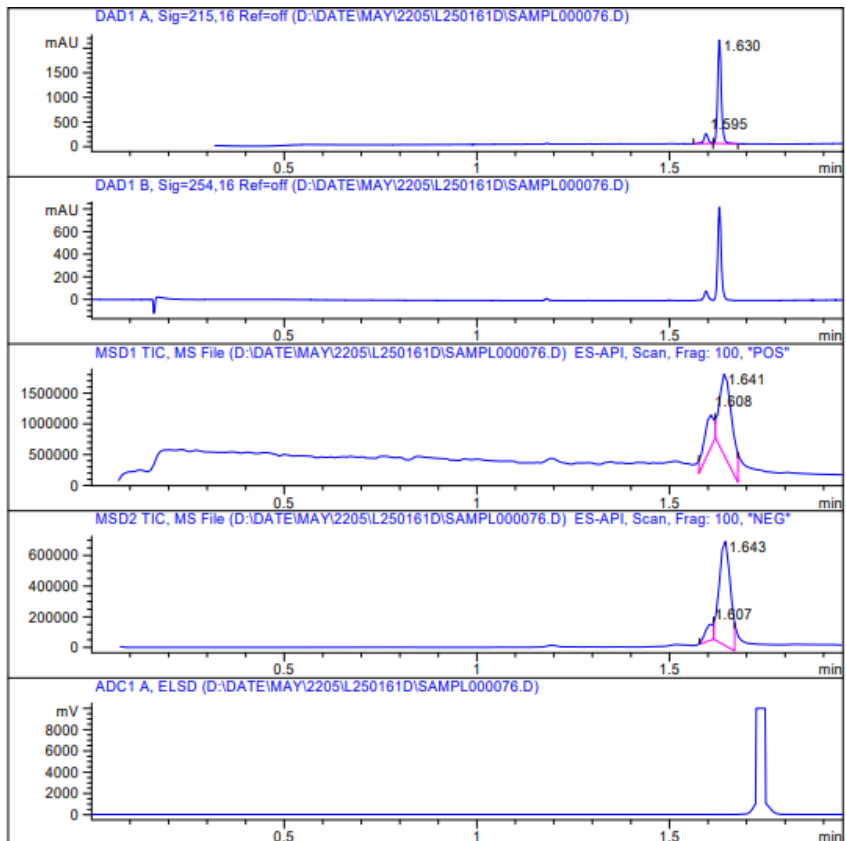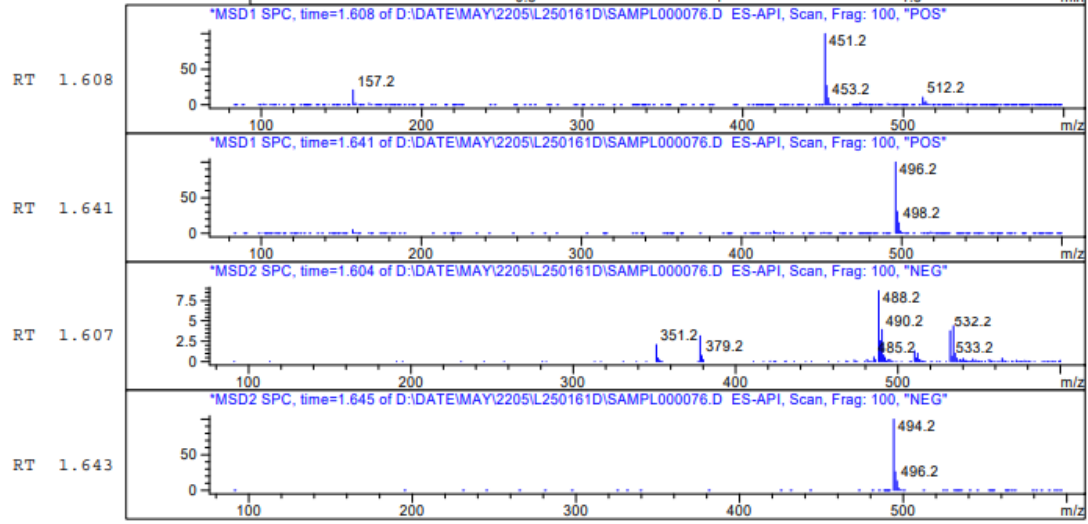

<sup>1</sup>H NMR spectrum of Z4121492036

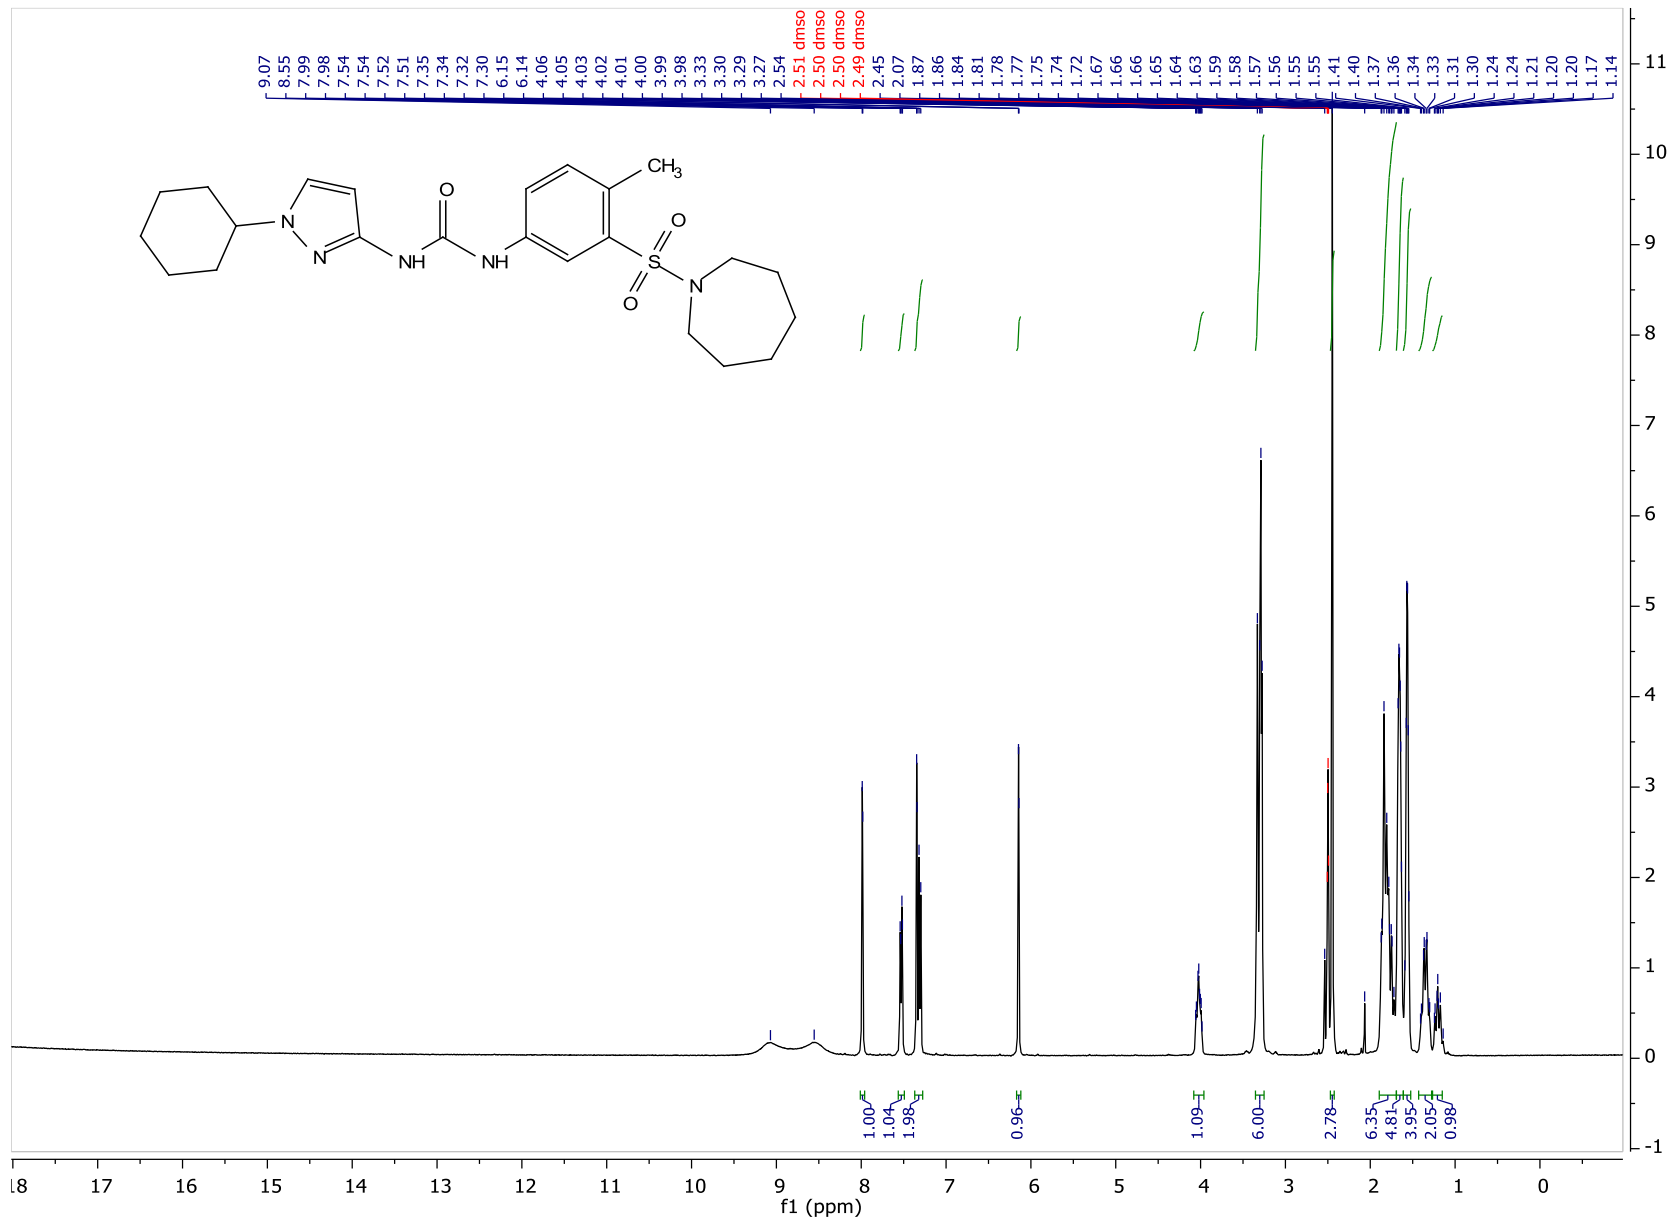

<sup>13</sup>C NMR spectrum of Z4121492036

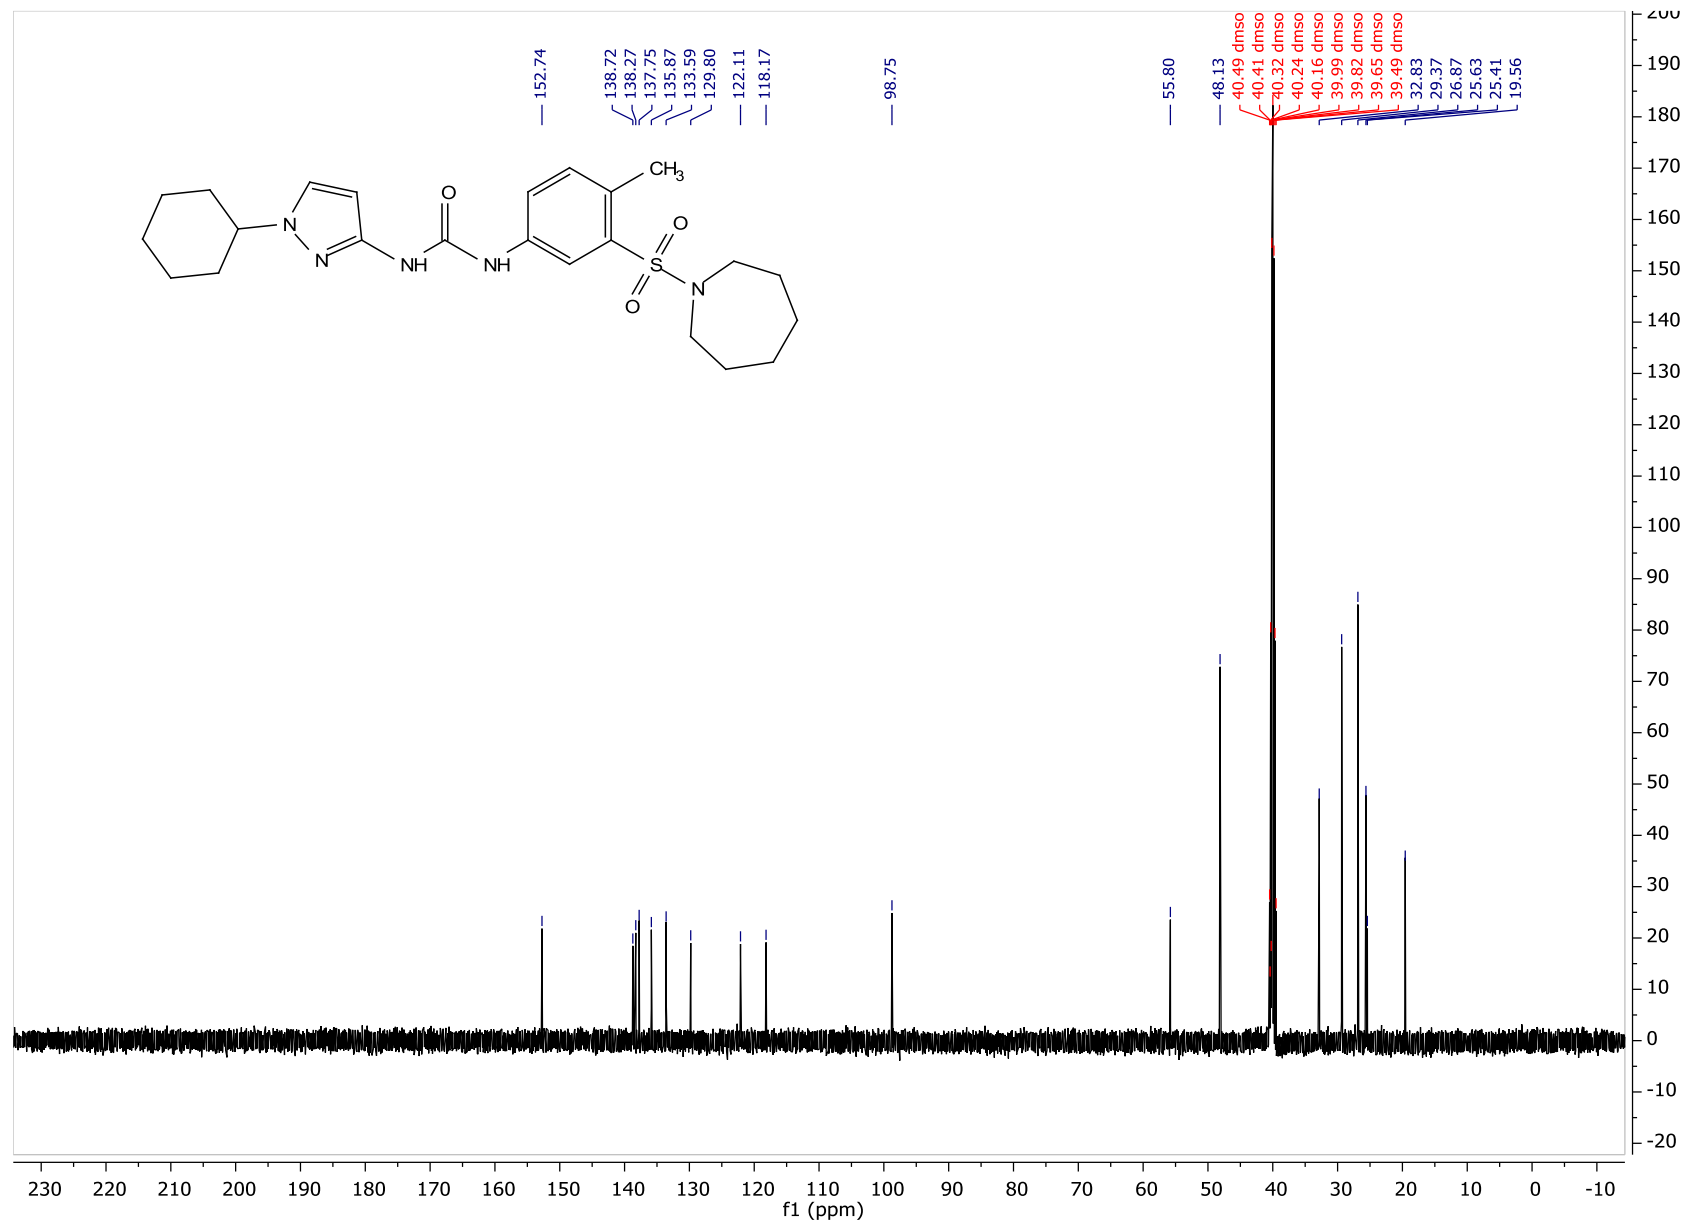

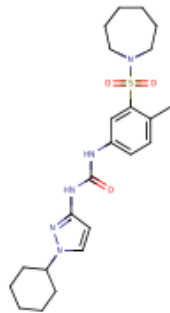

Mol Wt 459.6  
 Exact Mass 459.27

| # | Time  | Area%  |
|---|-------|--------|
| 1 | 1.395 | 100.00 |

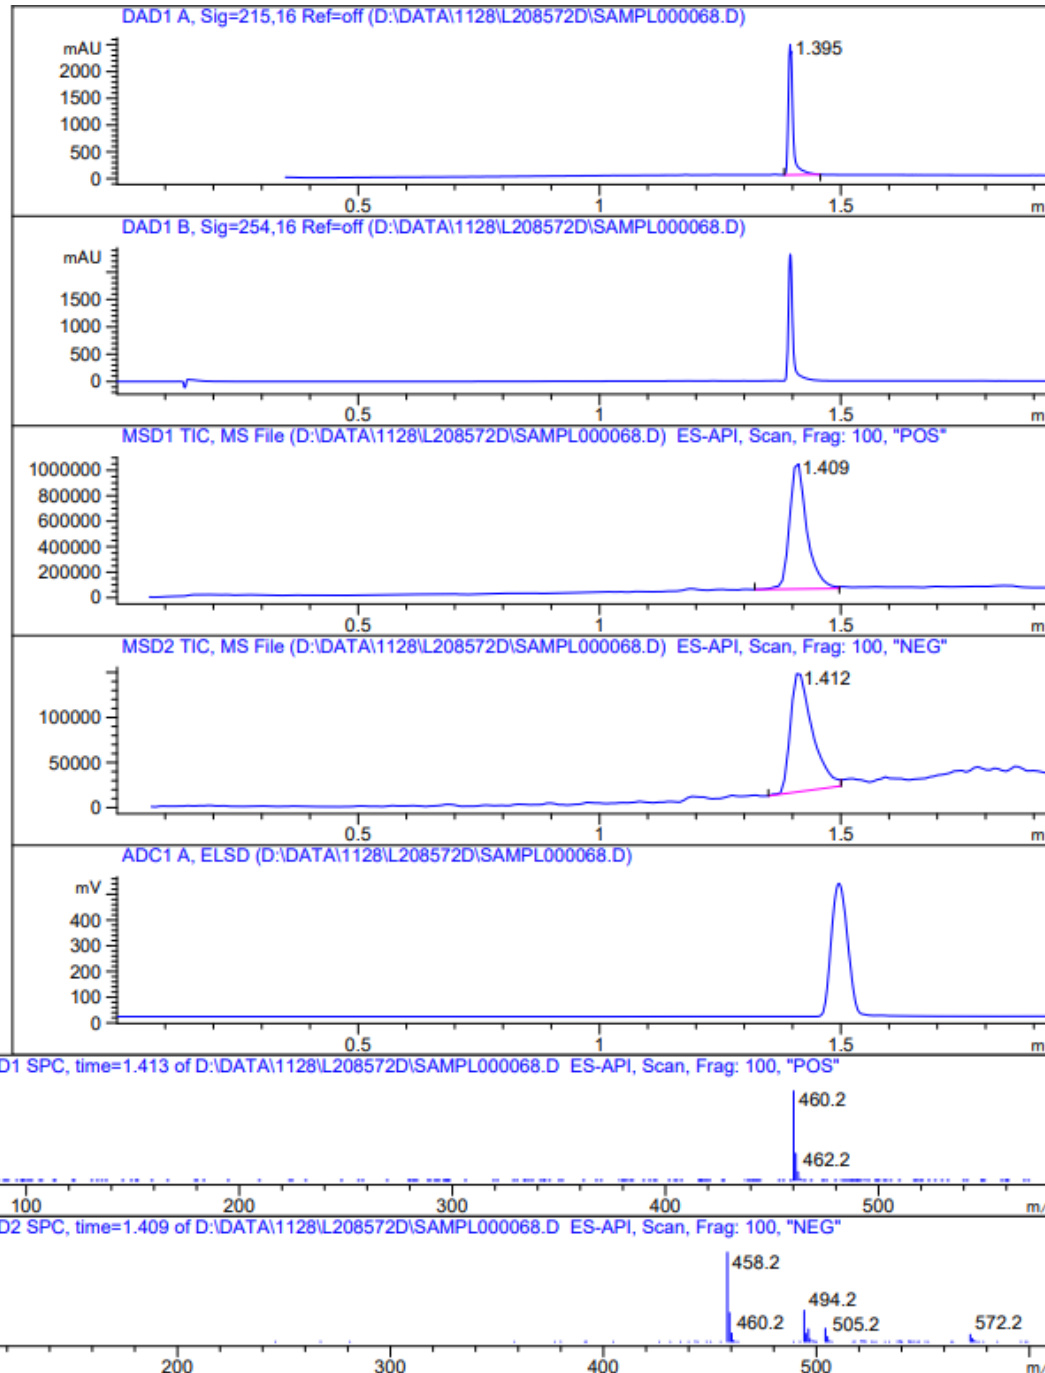

RT 1.409

RT 1.412



<sup>1</sup>H NMR spectrum of Z4121492050

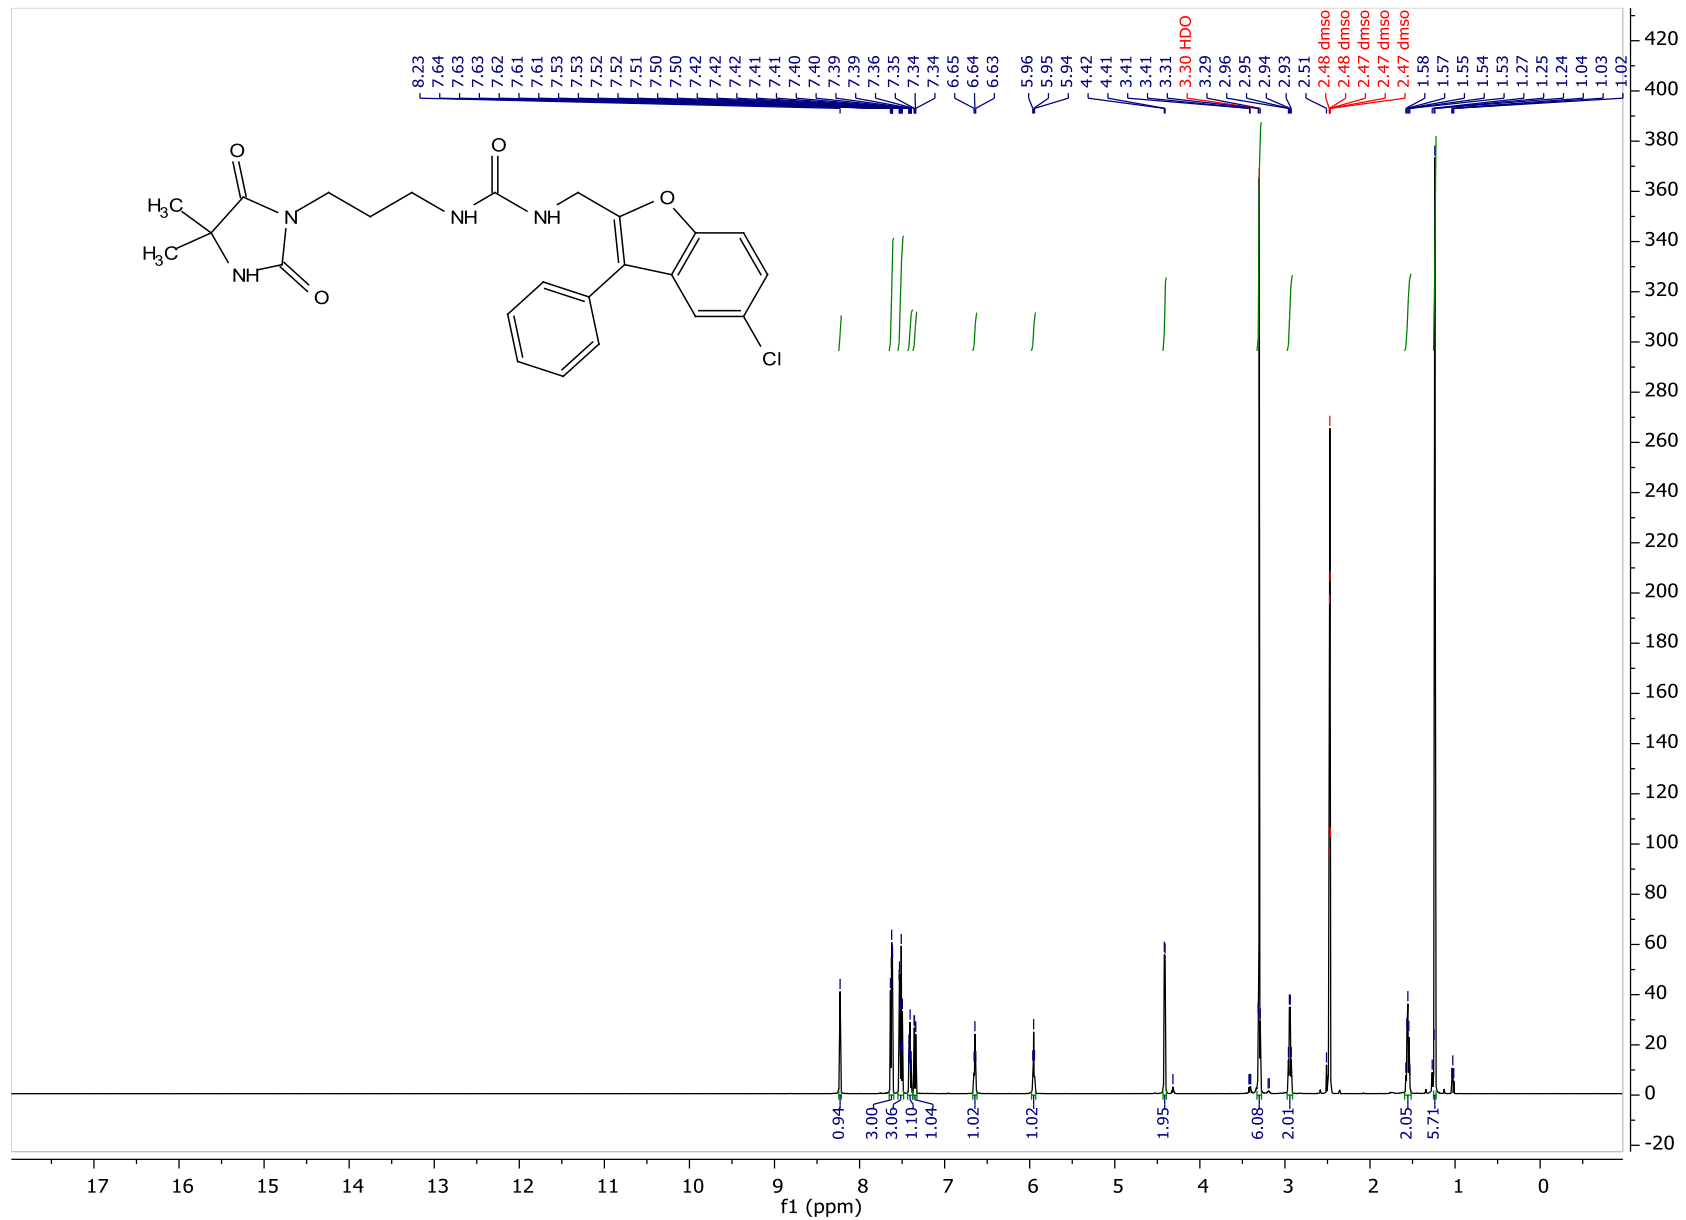

<sup>13</sup>C NMR spectrum of Z4121492050

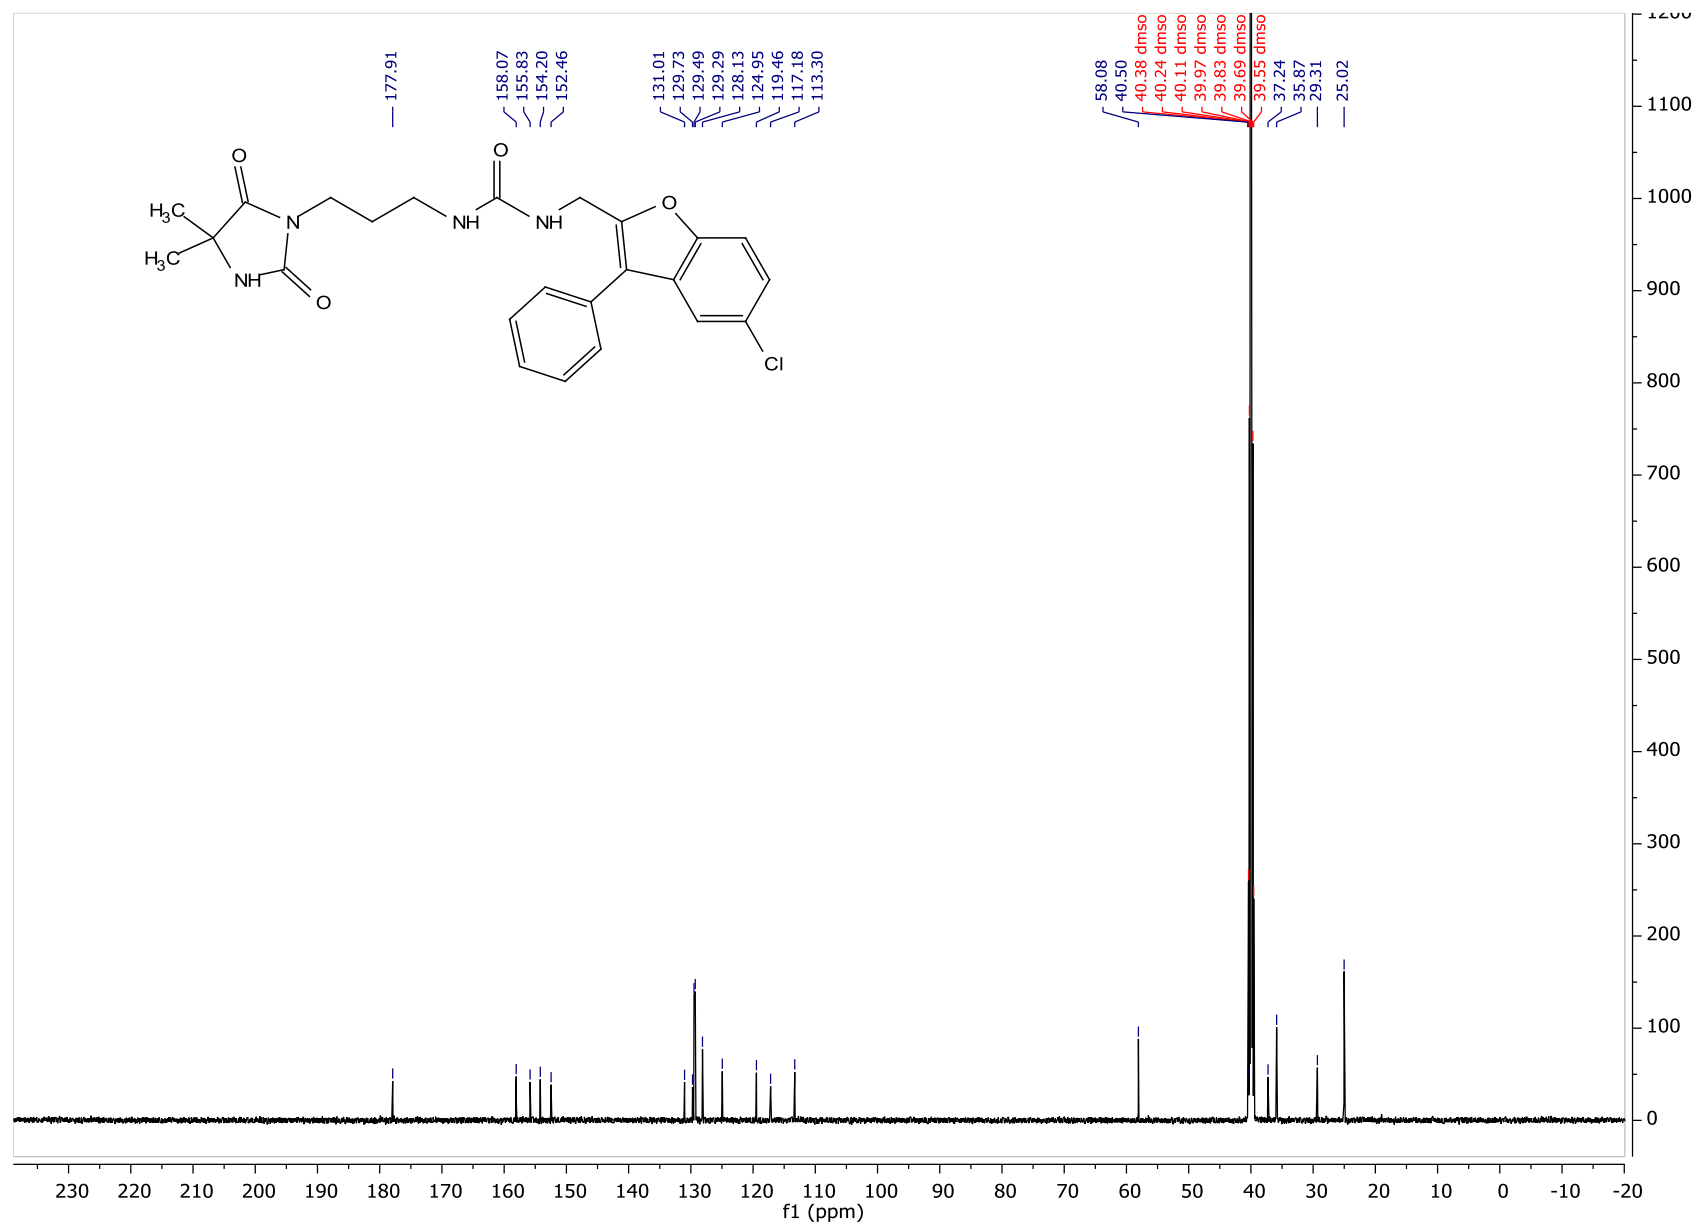

LC/MS spectrum of Z4121492050

Ret\_Time: 1.405 min

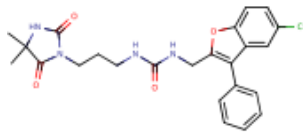

**Mol Wt** 468.93  
**Exact Mass** 468.18

| # | Time  | Area% |
|---|-------|-------|
| 1 | 1.356 | 1.67  |
| 2 | 1.405 | 98.33 |

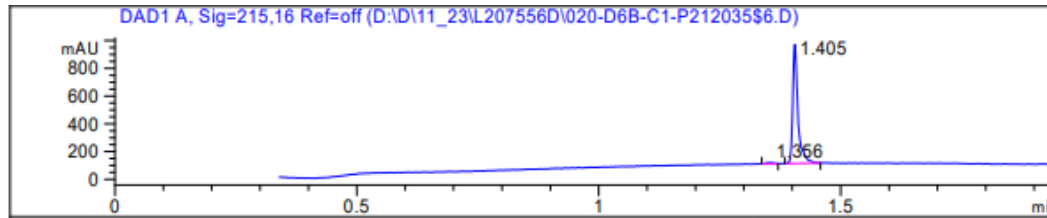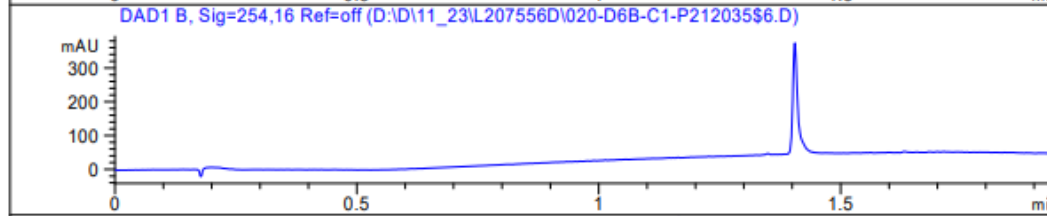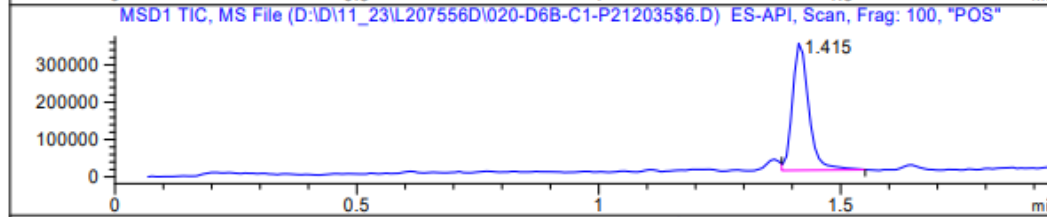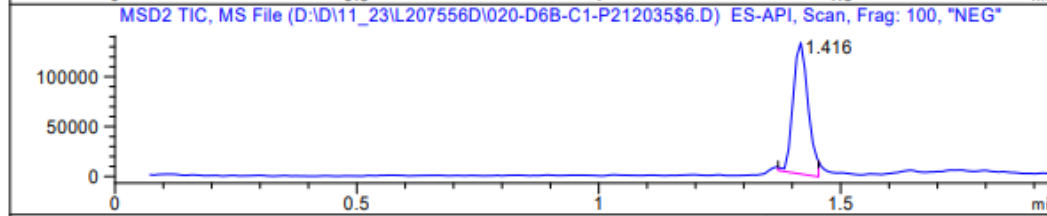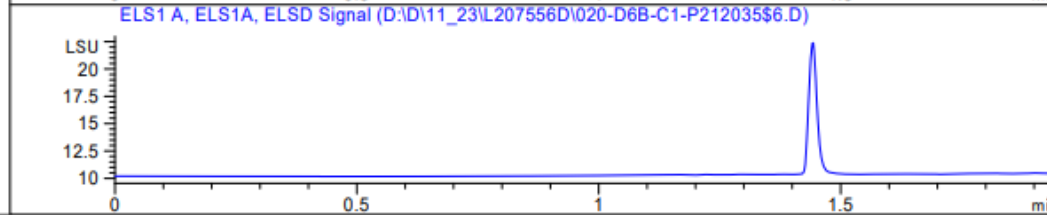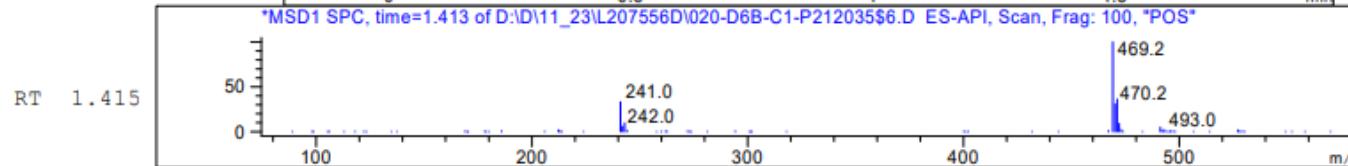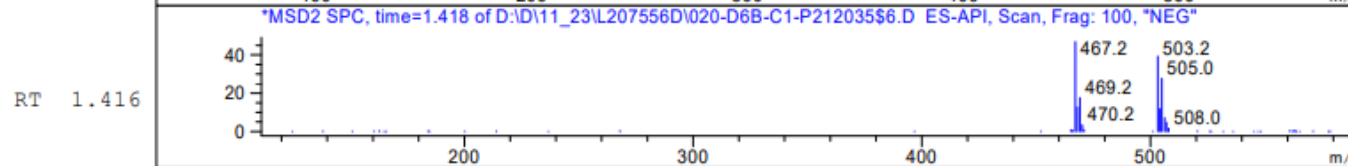

<sup>1</sup>H NMR spectrum of Z4121492118

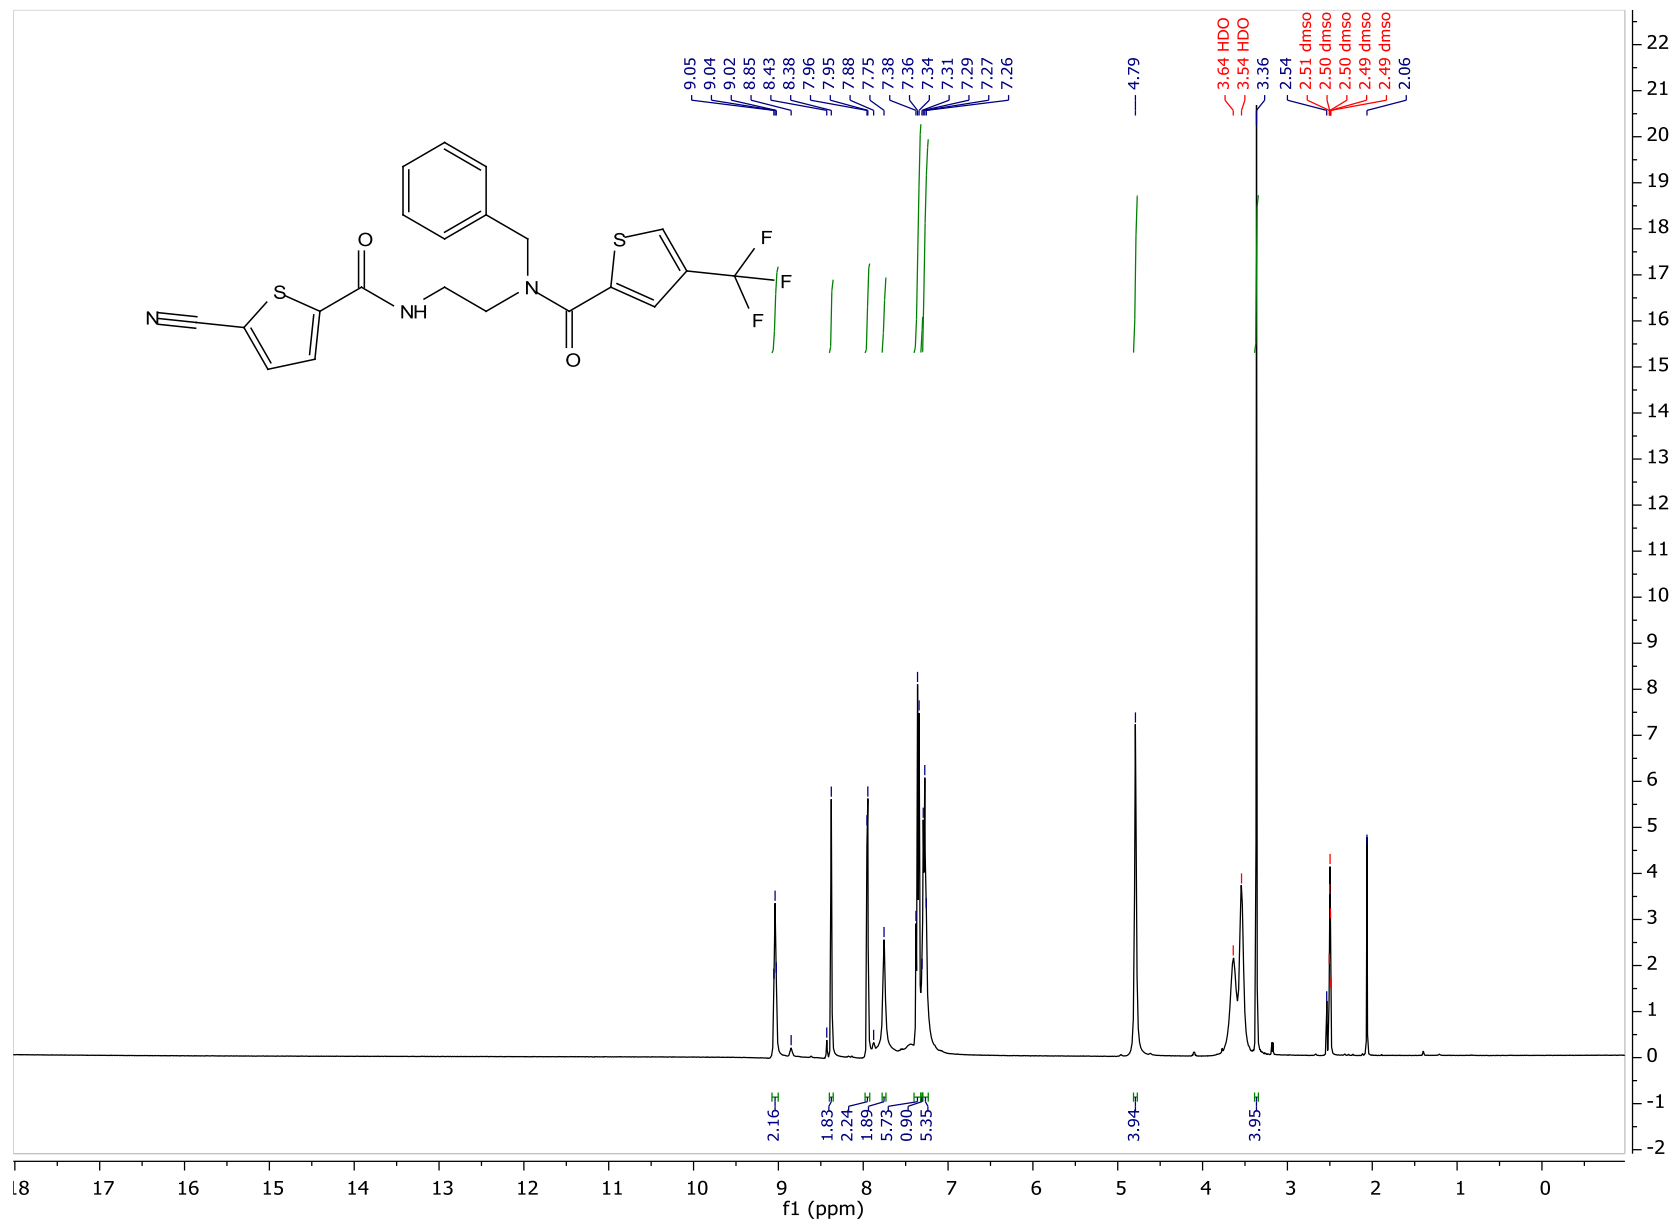

<sup>13</sup>C NMR spectrum of Z4121492118

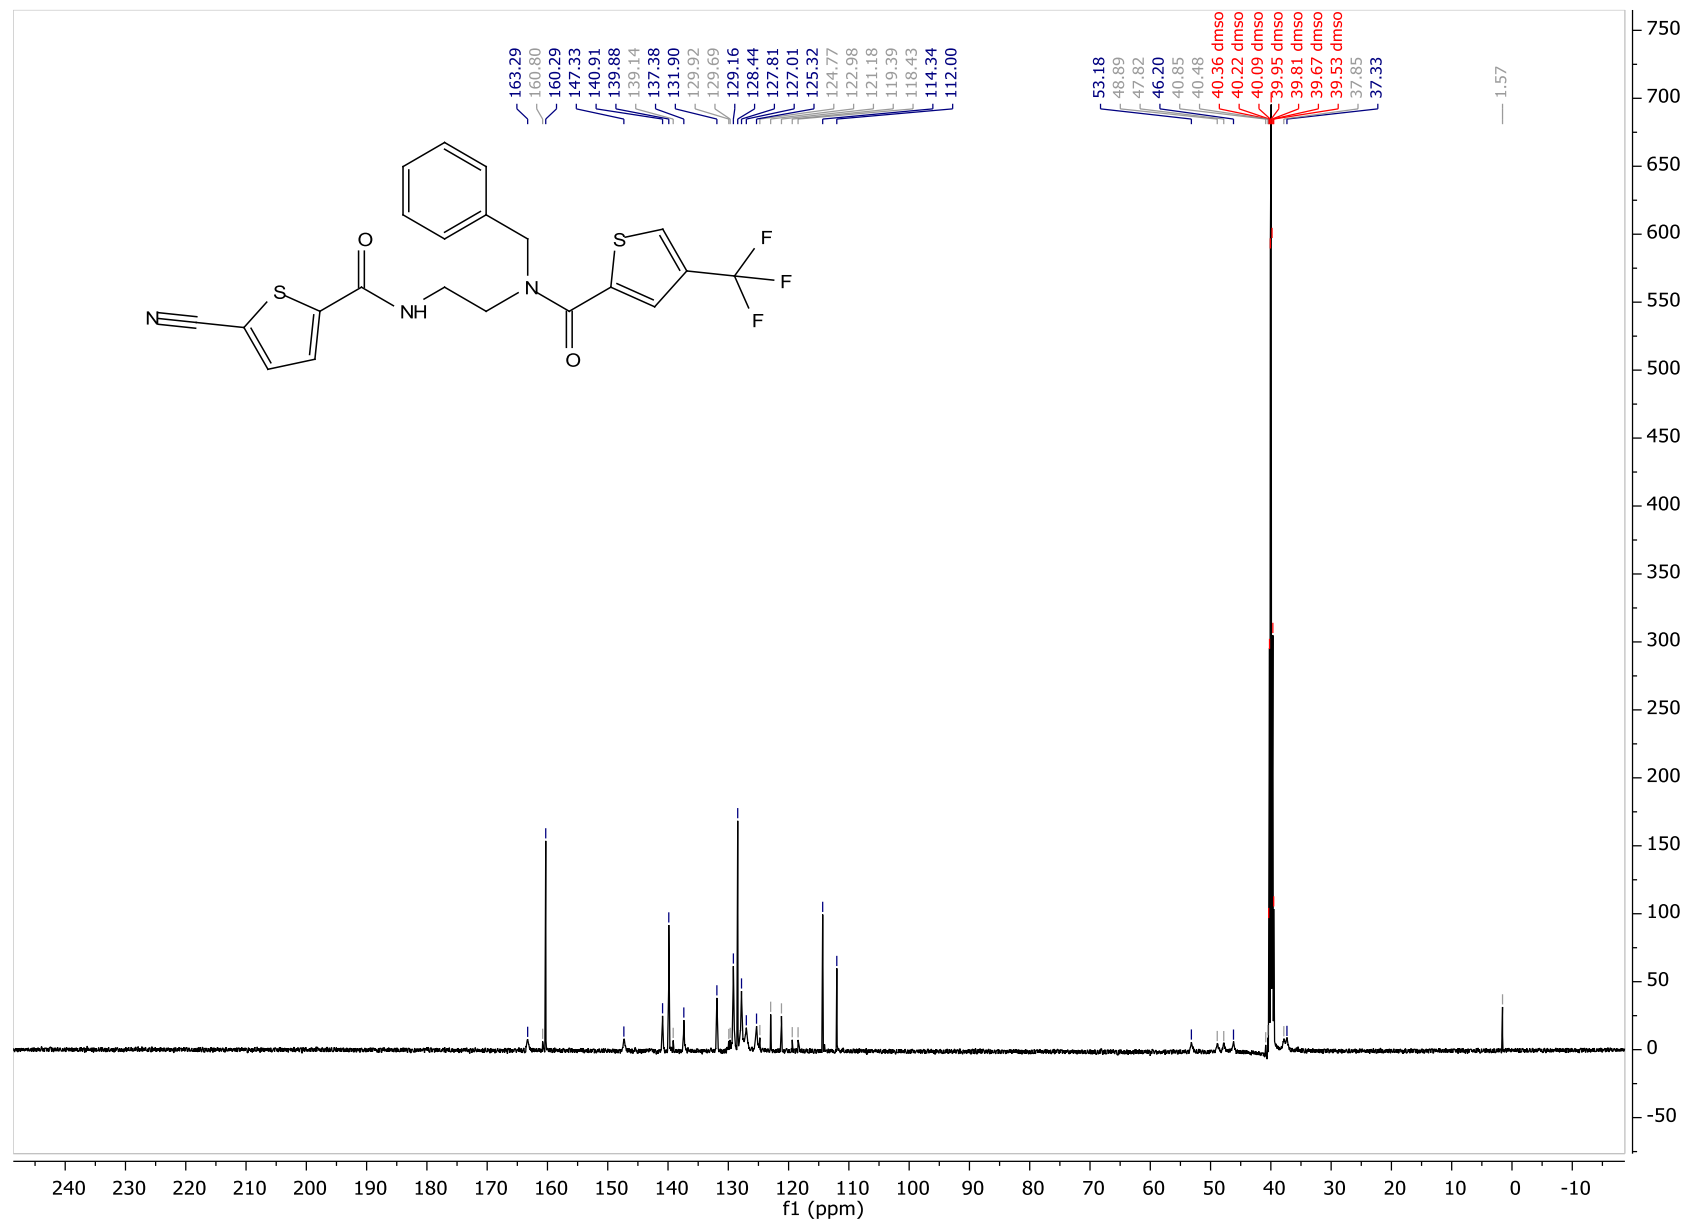

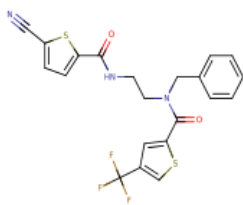

Mol Wt 463.5

Exact Mass 463.08

| # | Time  | Area% |
|---|-------|-------|
| 1 | 1.301 | 6.14  |
| 2 | 1.478 | 93.86 |

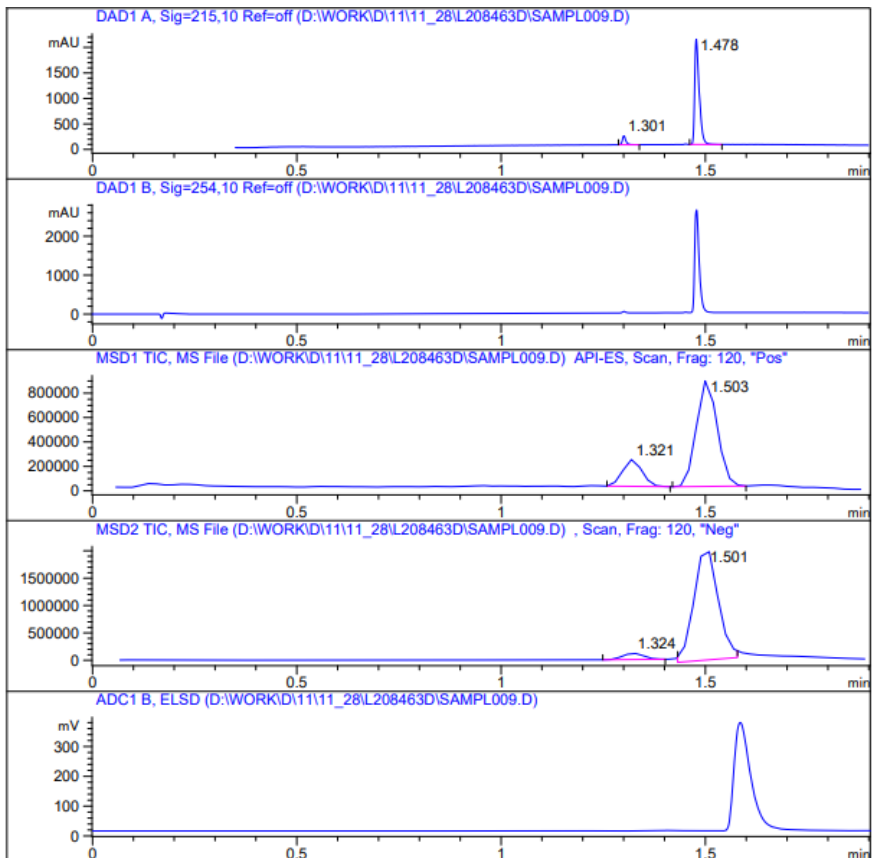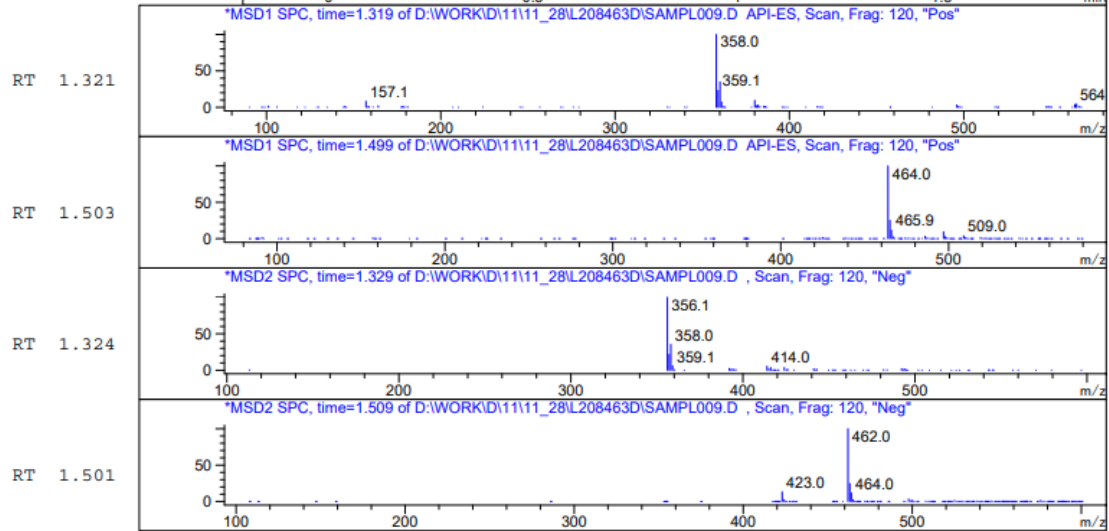

<sup>1</sup>H NMR spectrum of Z4121492133

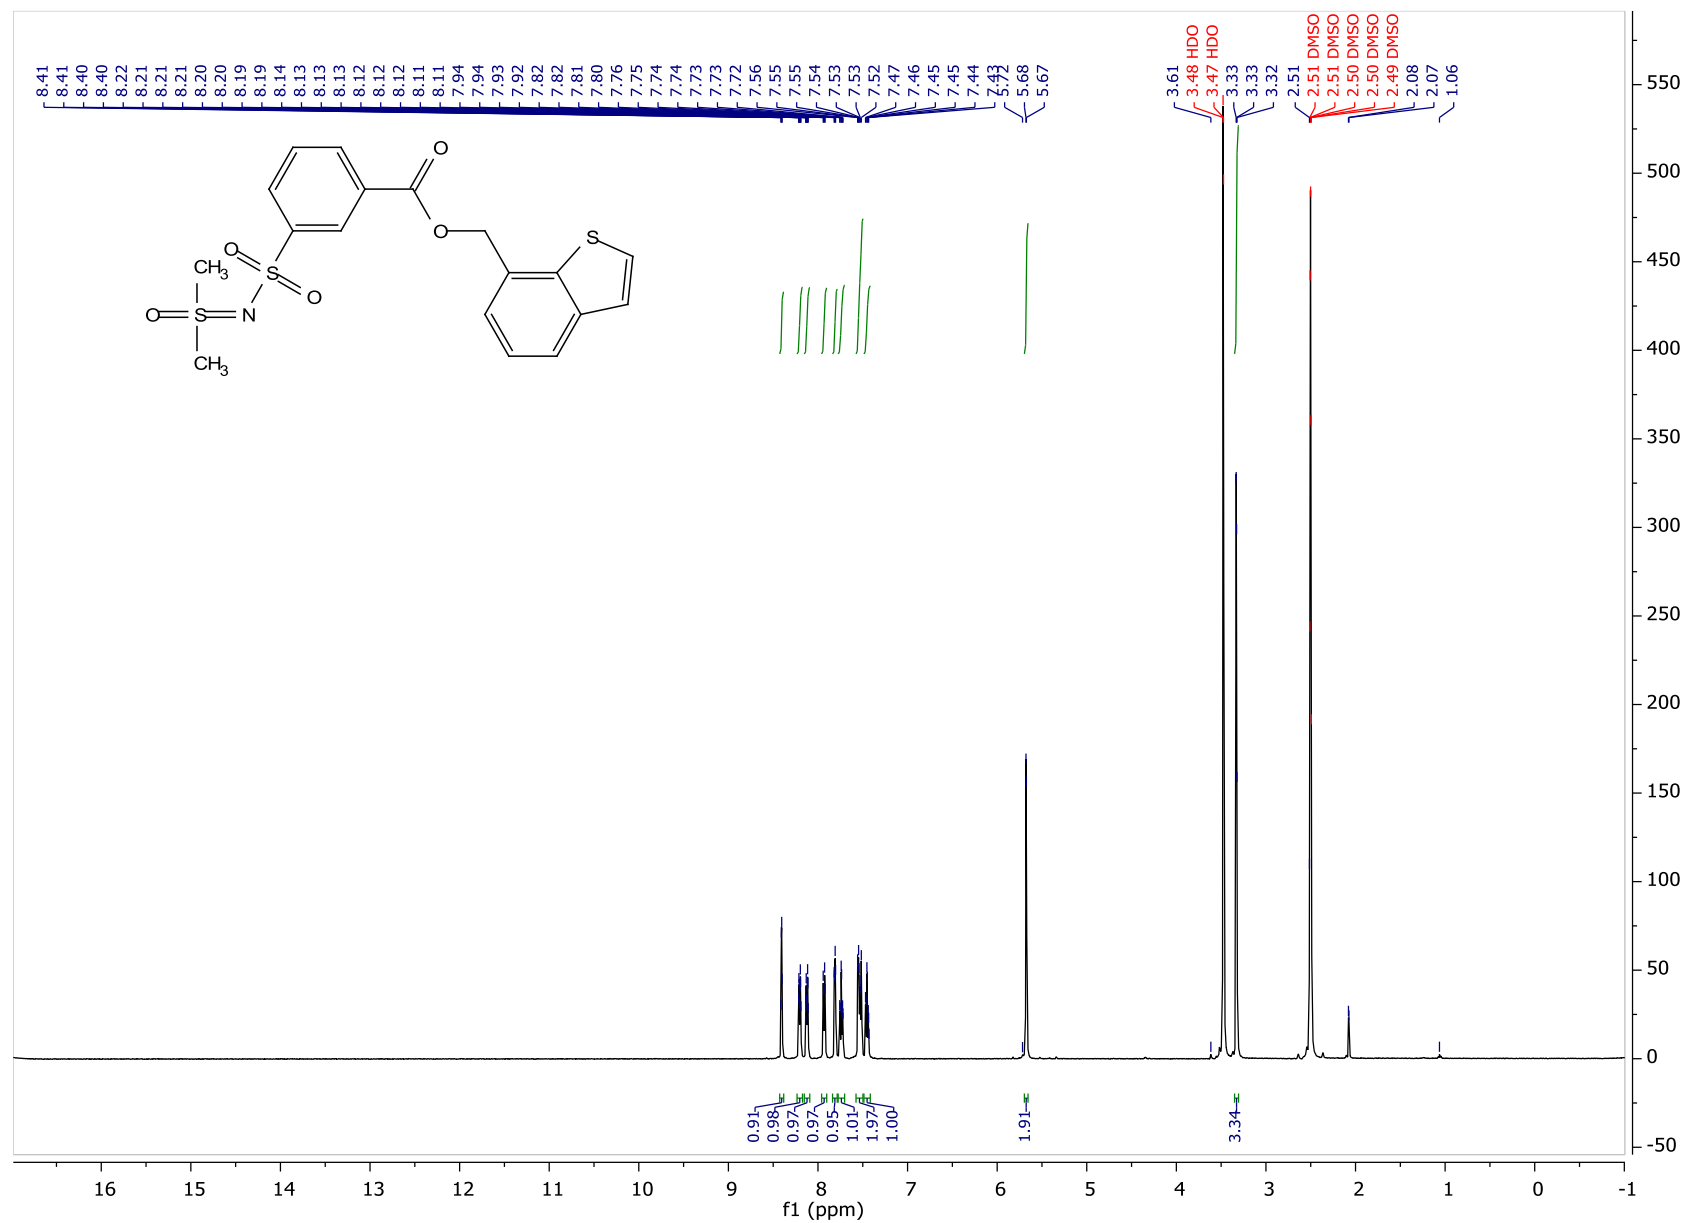

<sup>13</sup>C NMR spectrum of Z4121492133

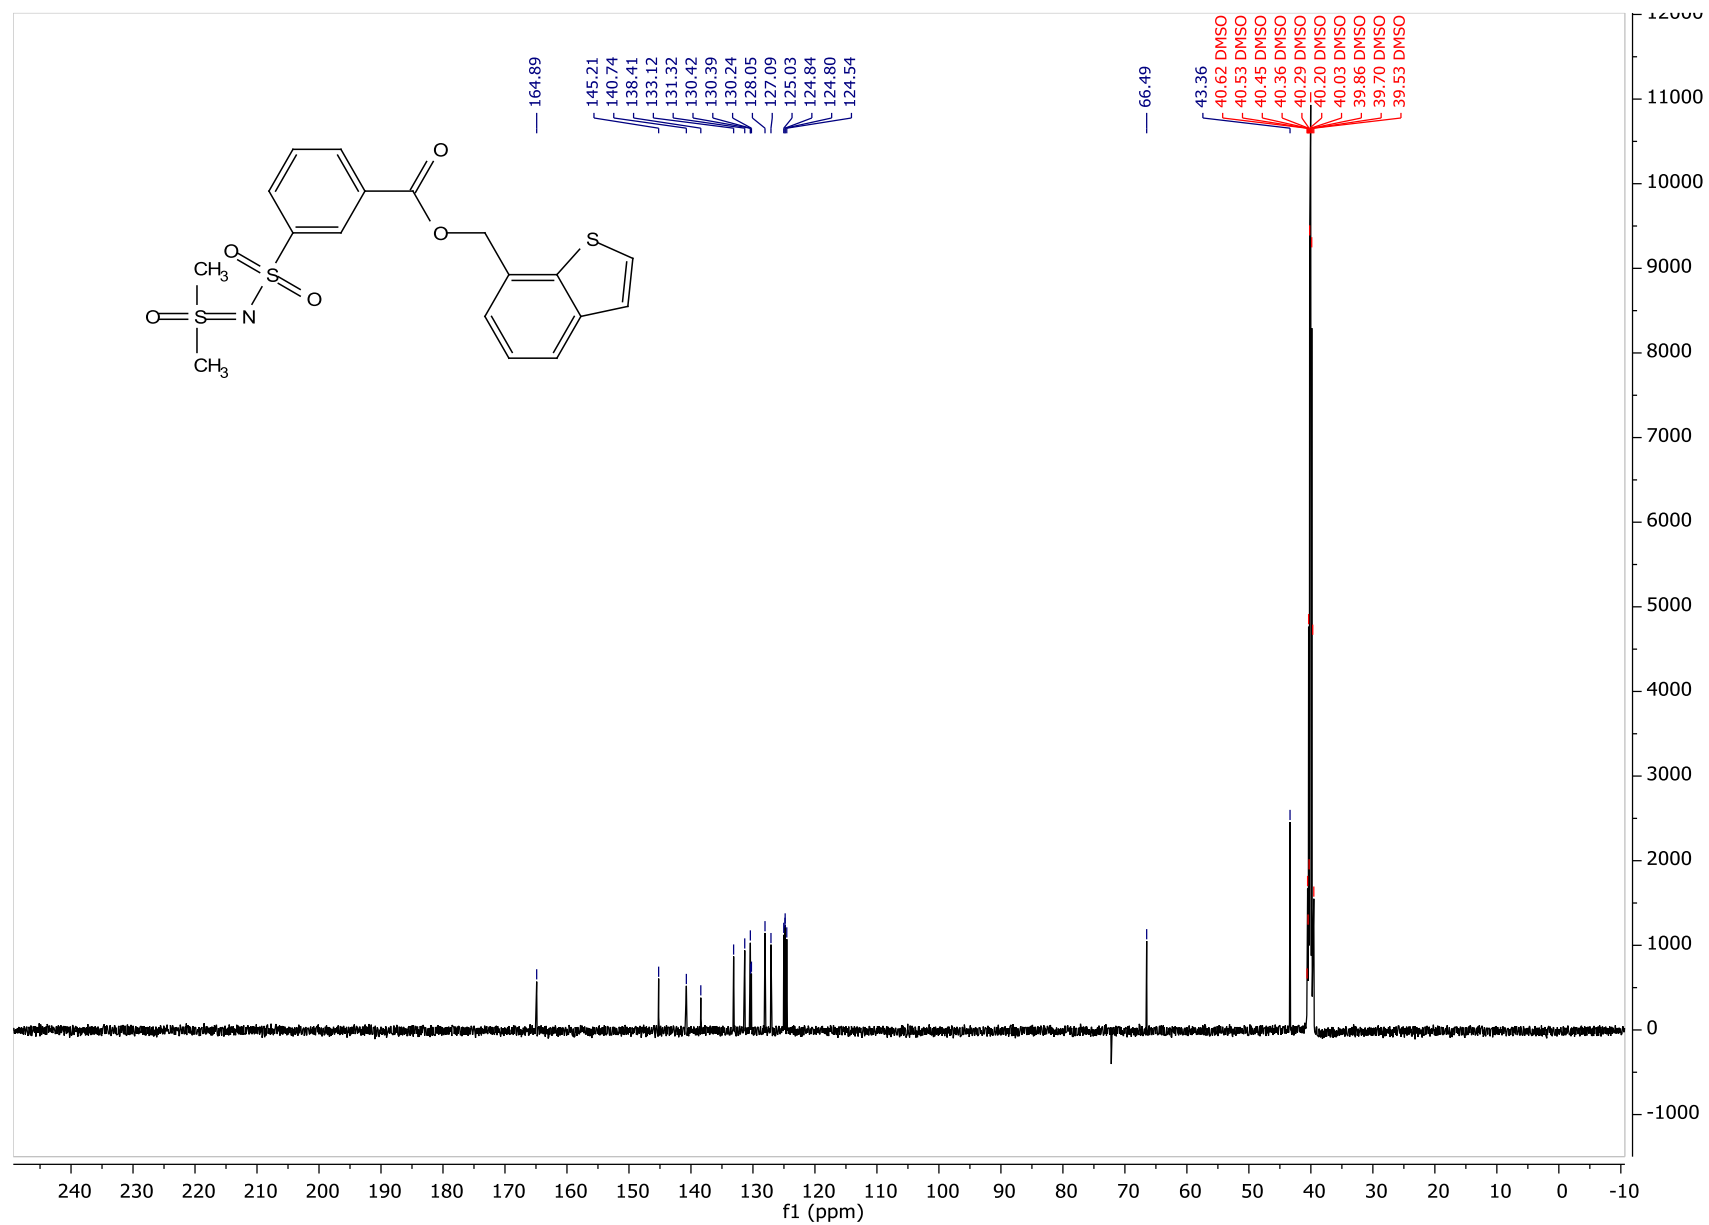



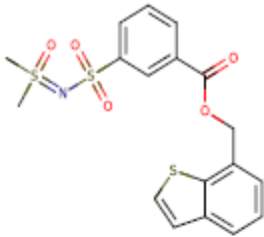

Mol Wt 423.53  
 Exact Mass 423.03

| # | Time  | Area%  |
|---|-------|--------|
| 1 | 1.337 | 100.00 |

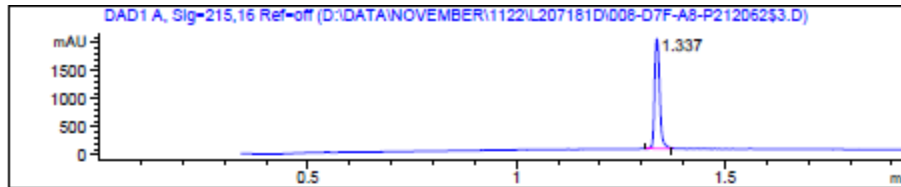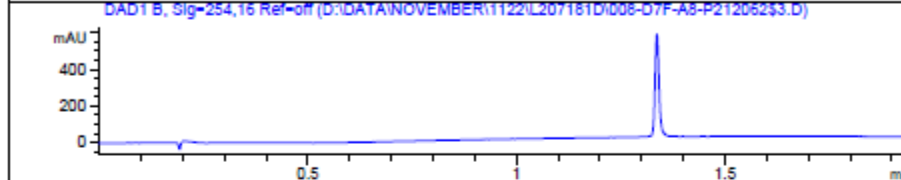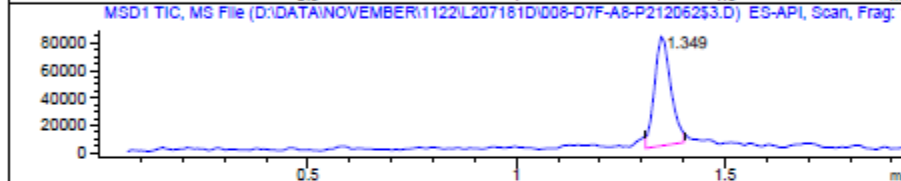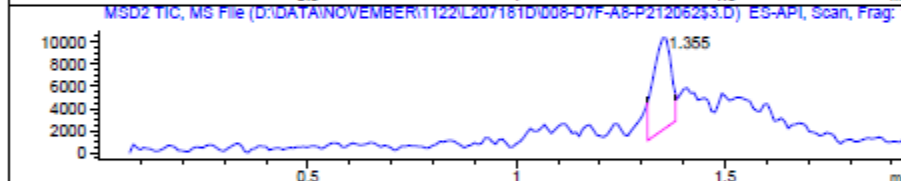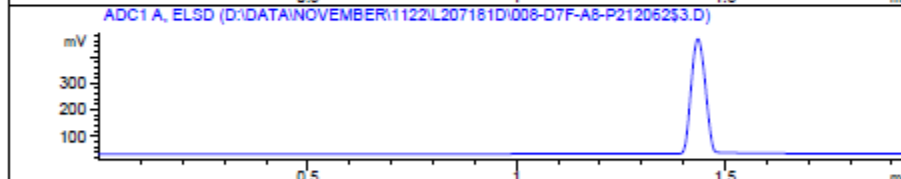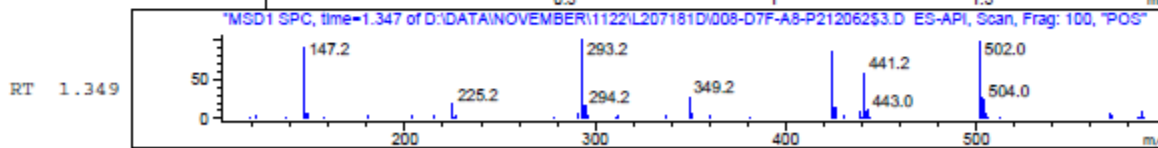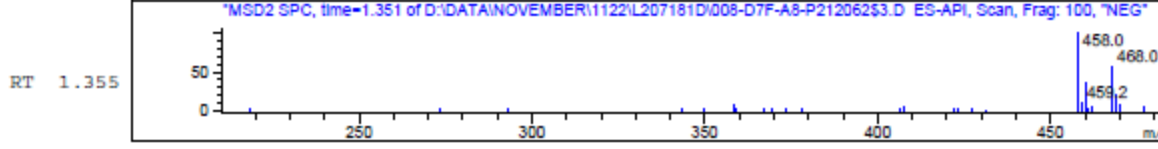

<sup>1</sup>H NMR spectrum of Z4121492147

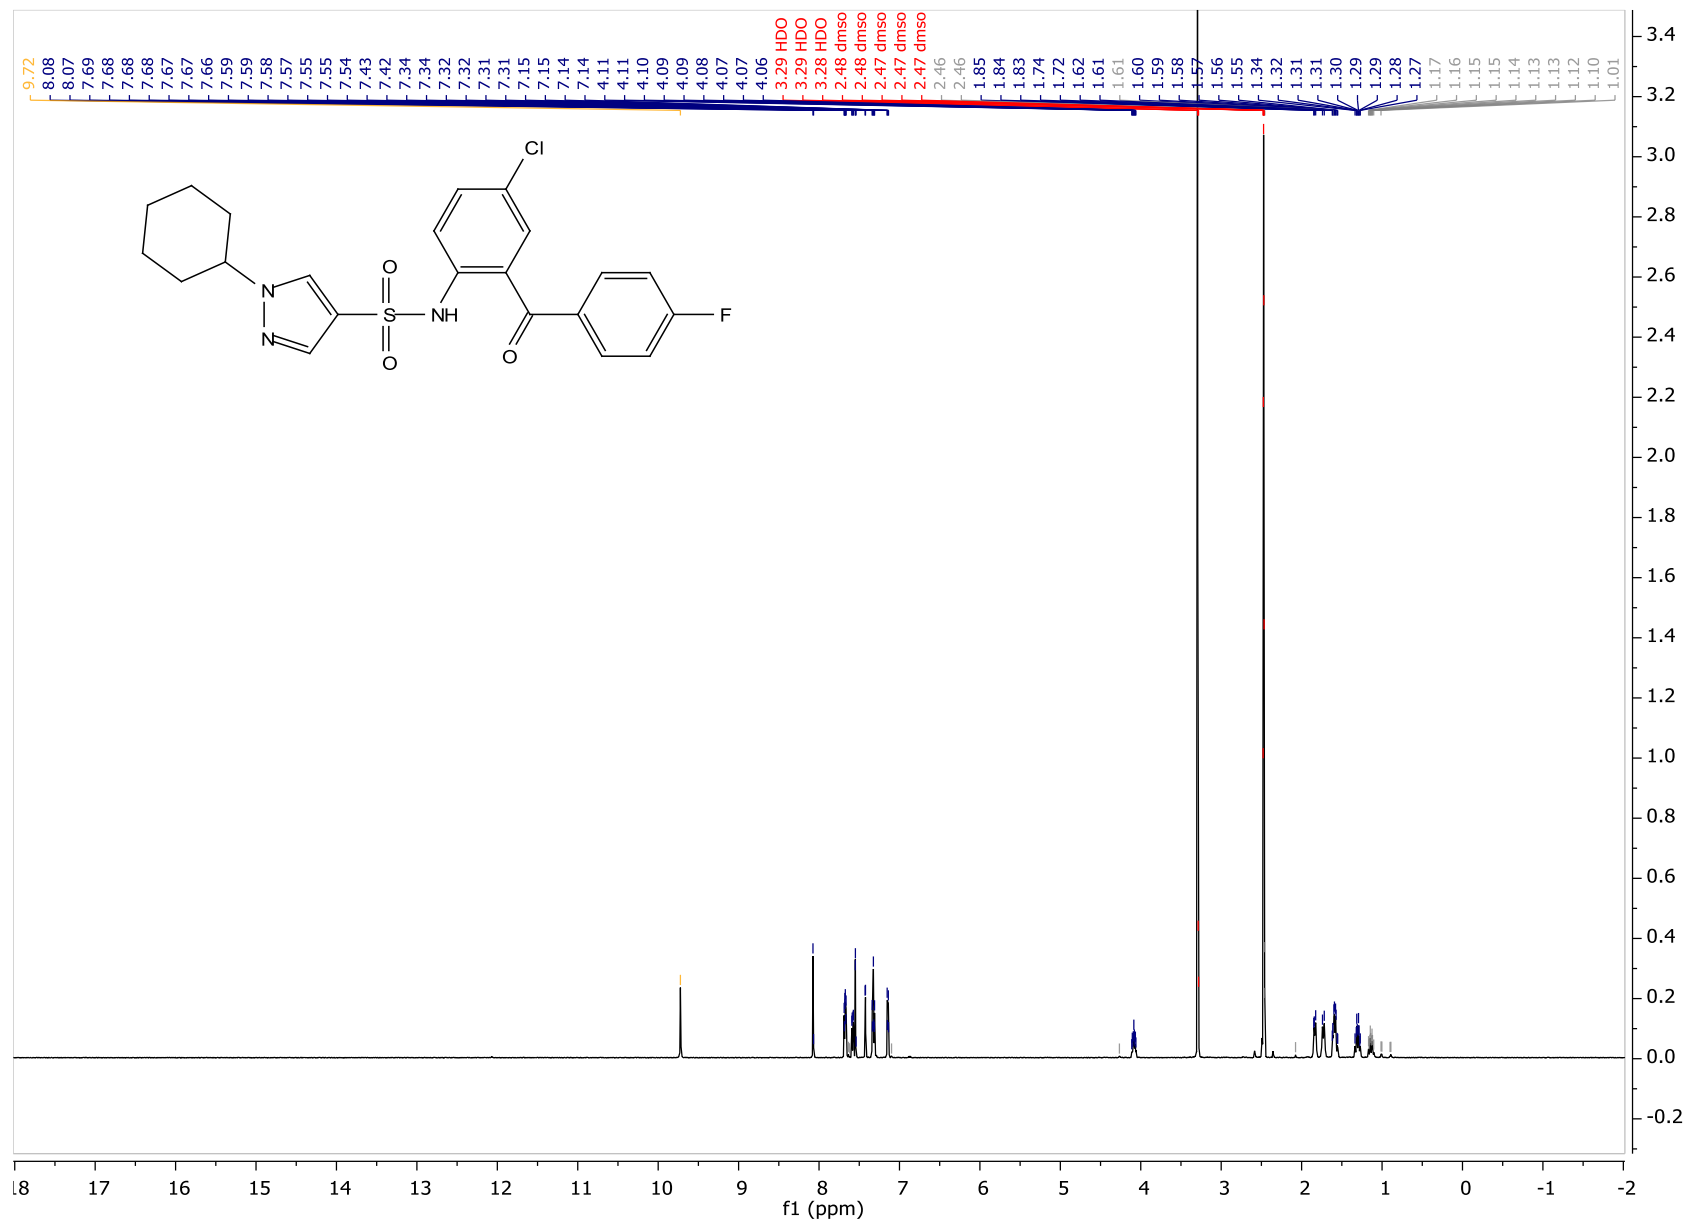

<sup>13</sup>C NMR spectrum of Z4121492147

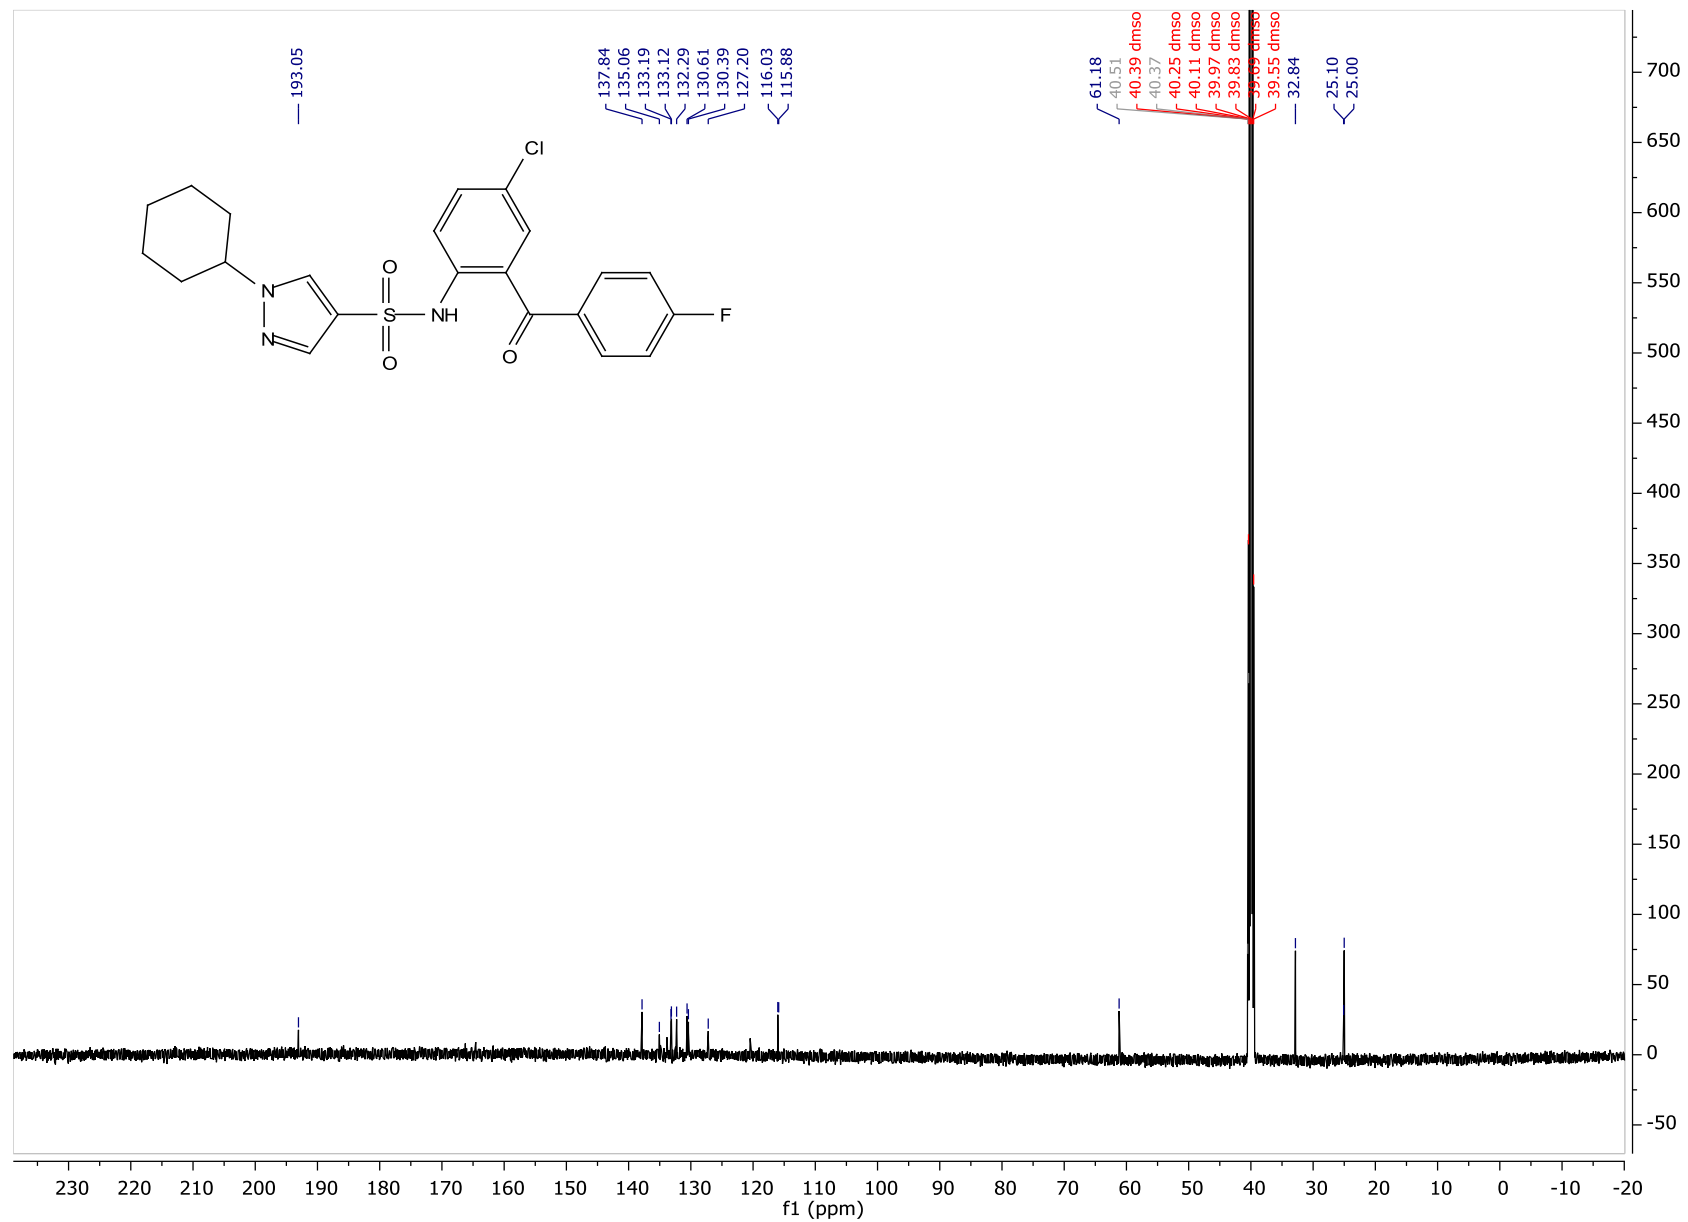

Ret\_Time: 1.669 min

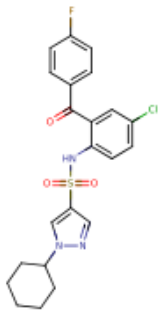

**Mol Wt** 461.94  
**Exact Mass** 461.12

| # | Time  | Area% |
|---|-------|-------|
| 1 | 1.631 | 2.48  |
| 2 | 1.669 | 97.52 |

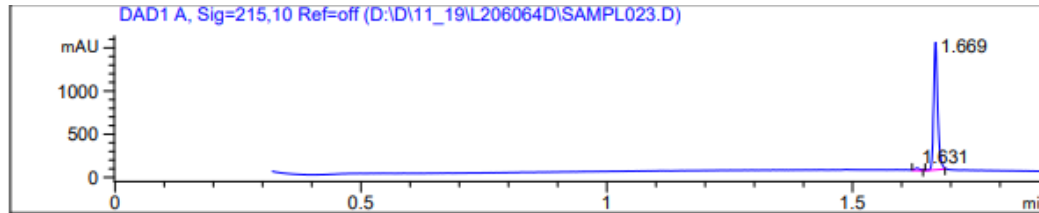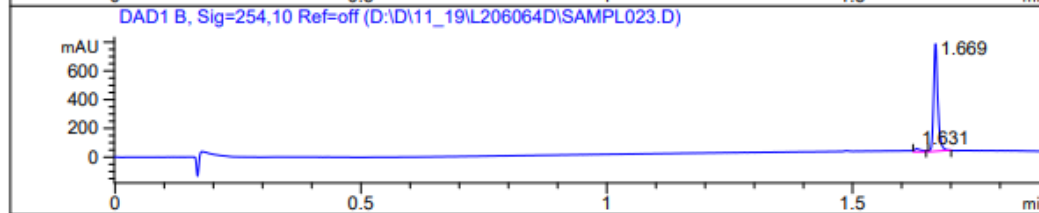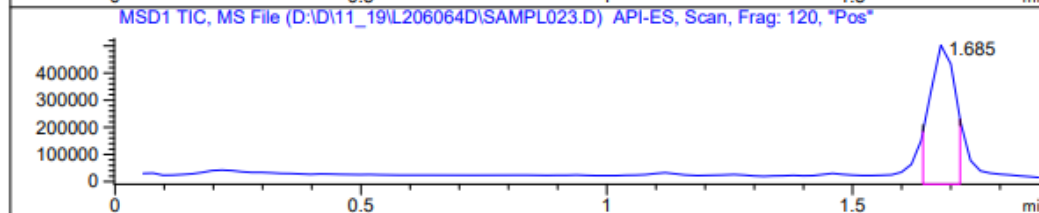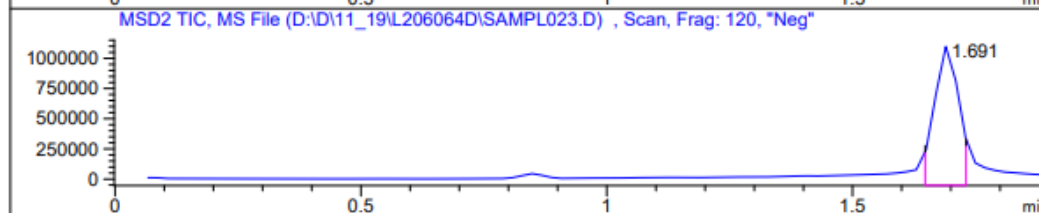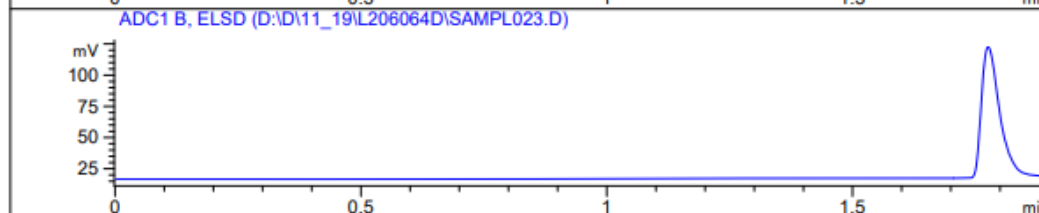

RT 1.685

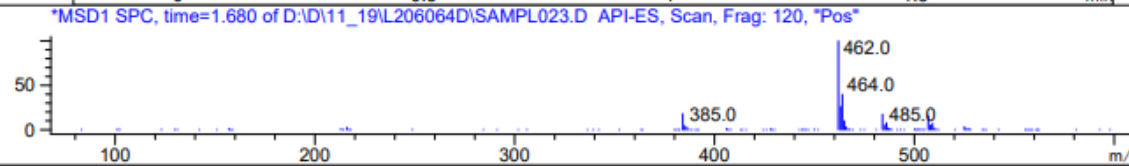

RT 1.691

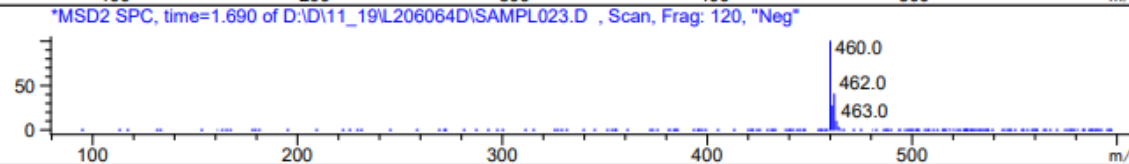

<sup>1</sup>H NMR spectrum of Z4121492165

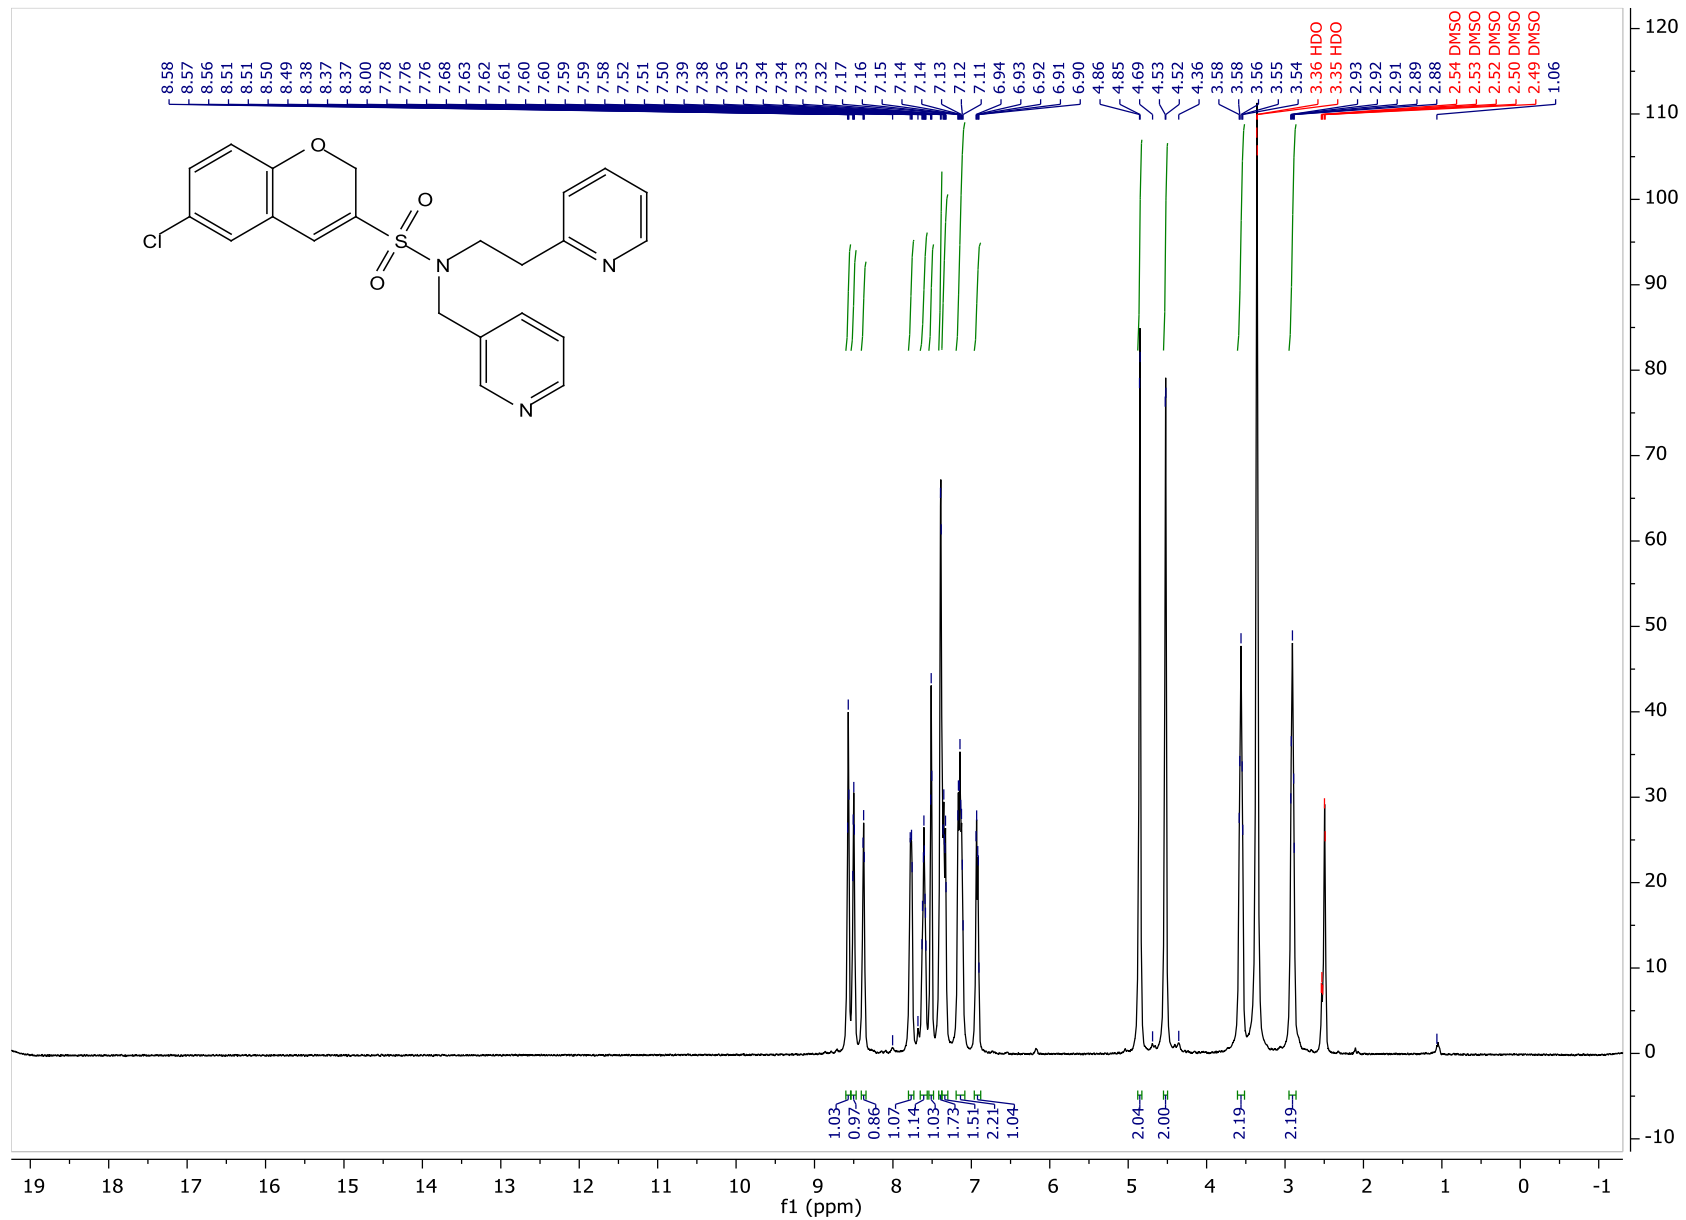

<sup>13</sup>C NMR spectrum of Z4121492165

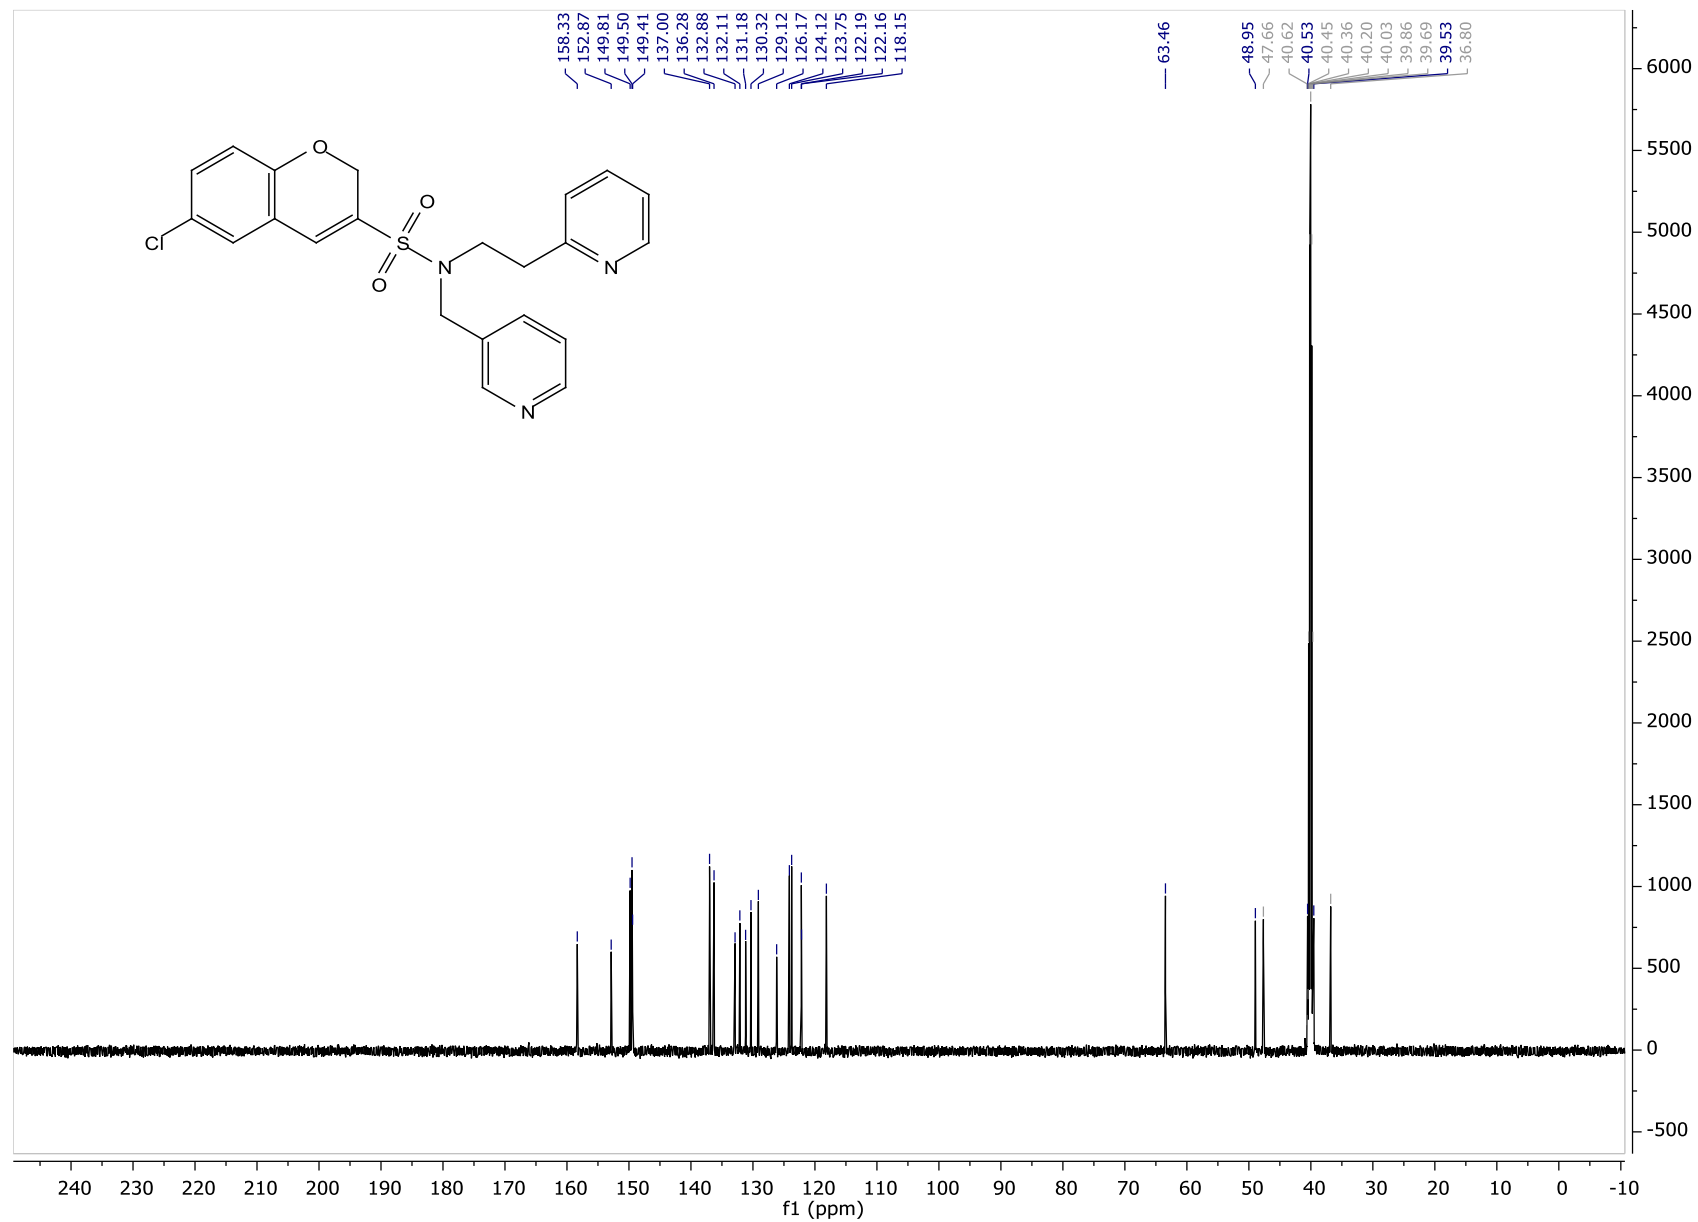

LC/MS spectrum of Z4121492165

Ret\_Time: 1.014 min

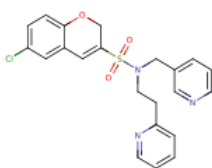

Mol Wt 441.93  
Exact Mass 441.11

| # | Time  | Area% |
|---|-------|-------|
| 1 | 0.859 | 2.57  |
| 2 | 0.898 | 6.44  |
| 3 | 1.014 | 90.99 |

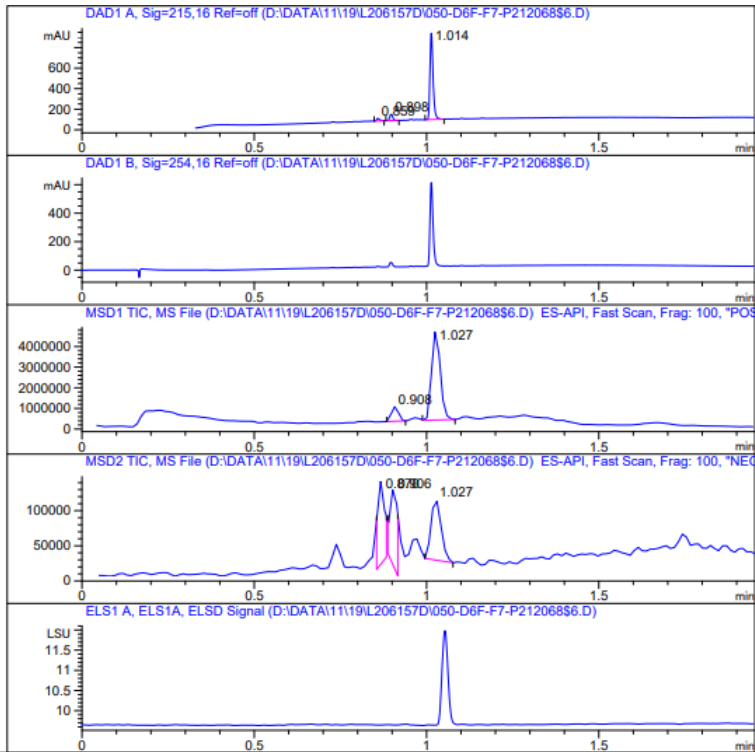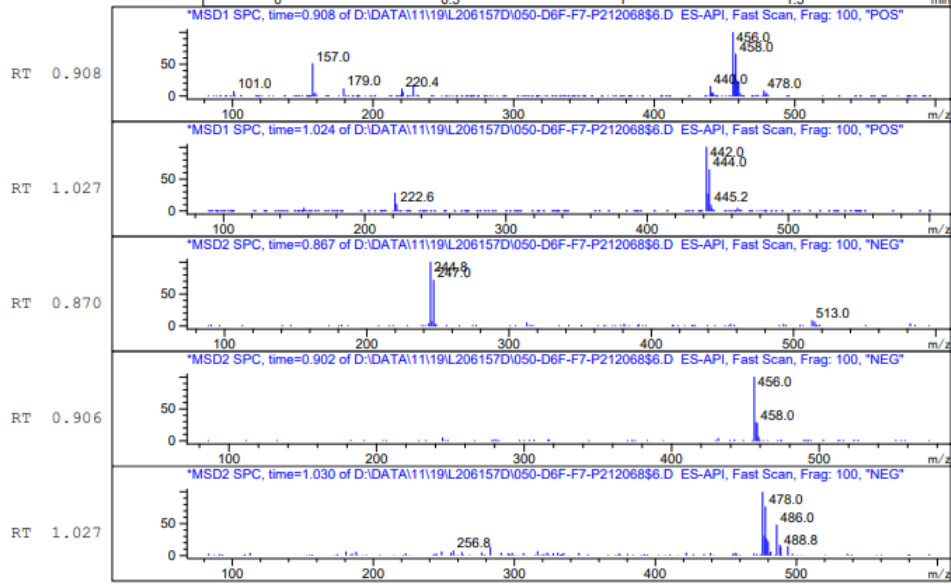

<sup>1</sup>H NMR spectrum of Z4121492212

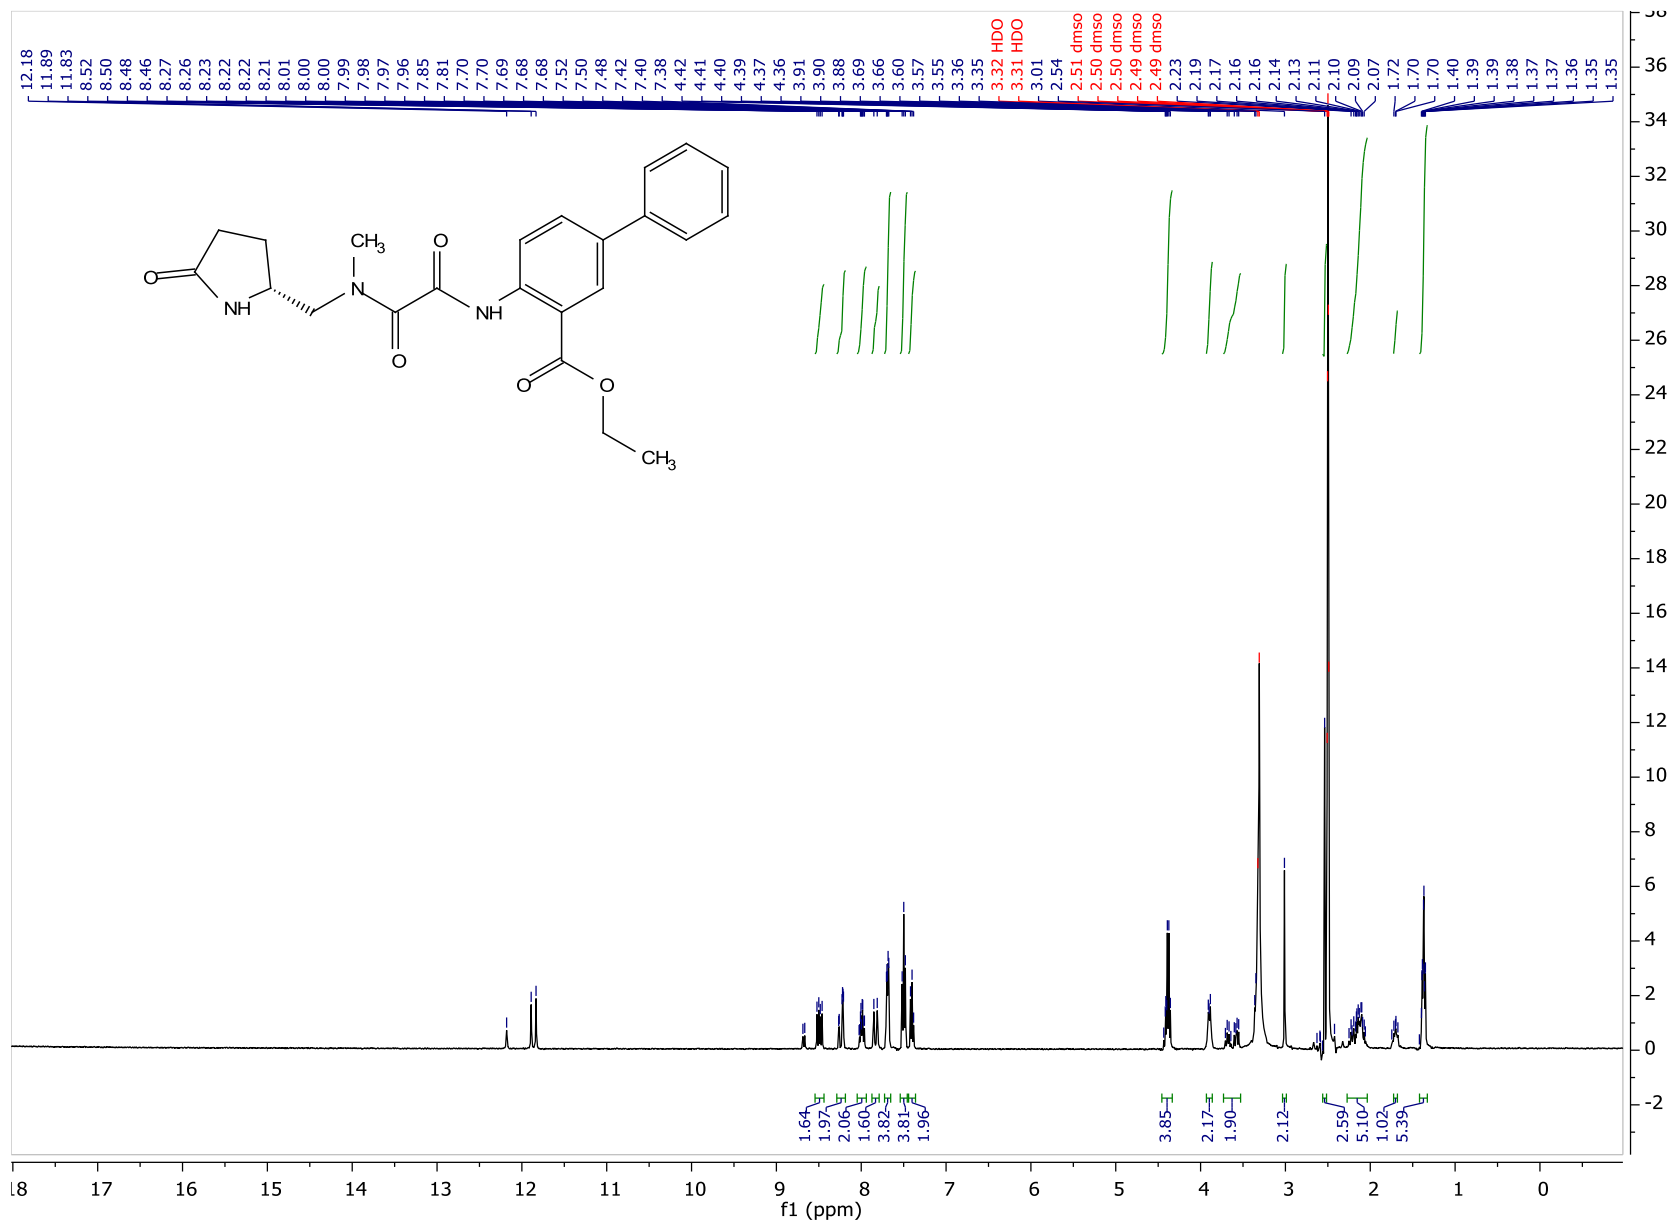



<sup>13</sup>C NMR spectrum of Z4121492212

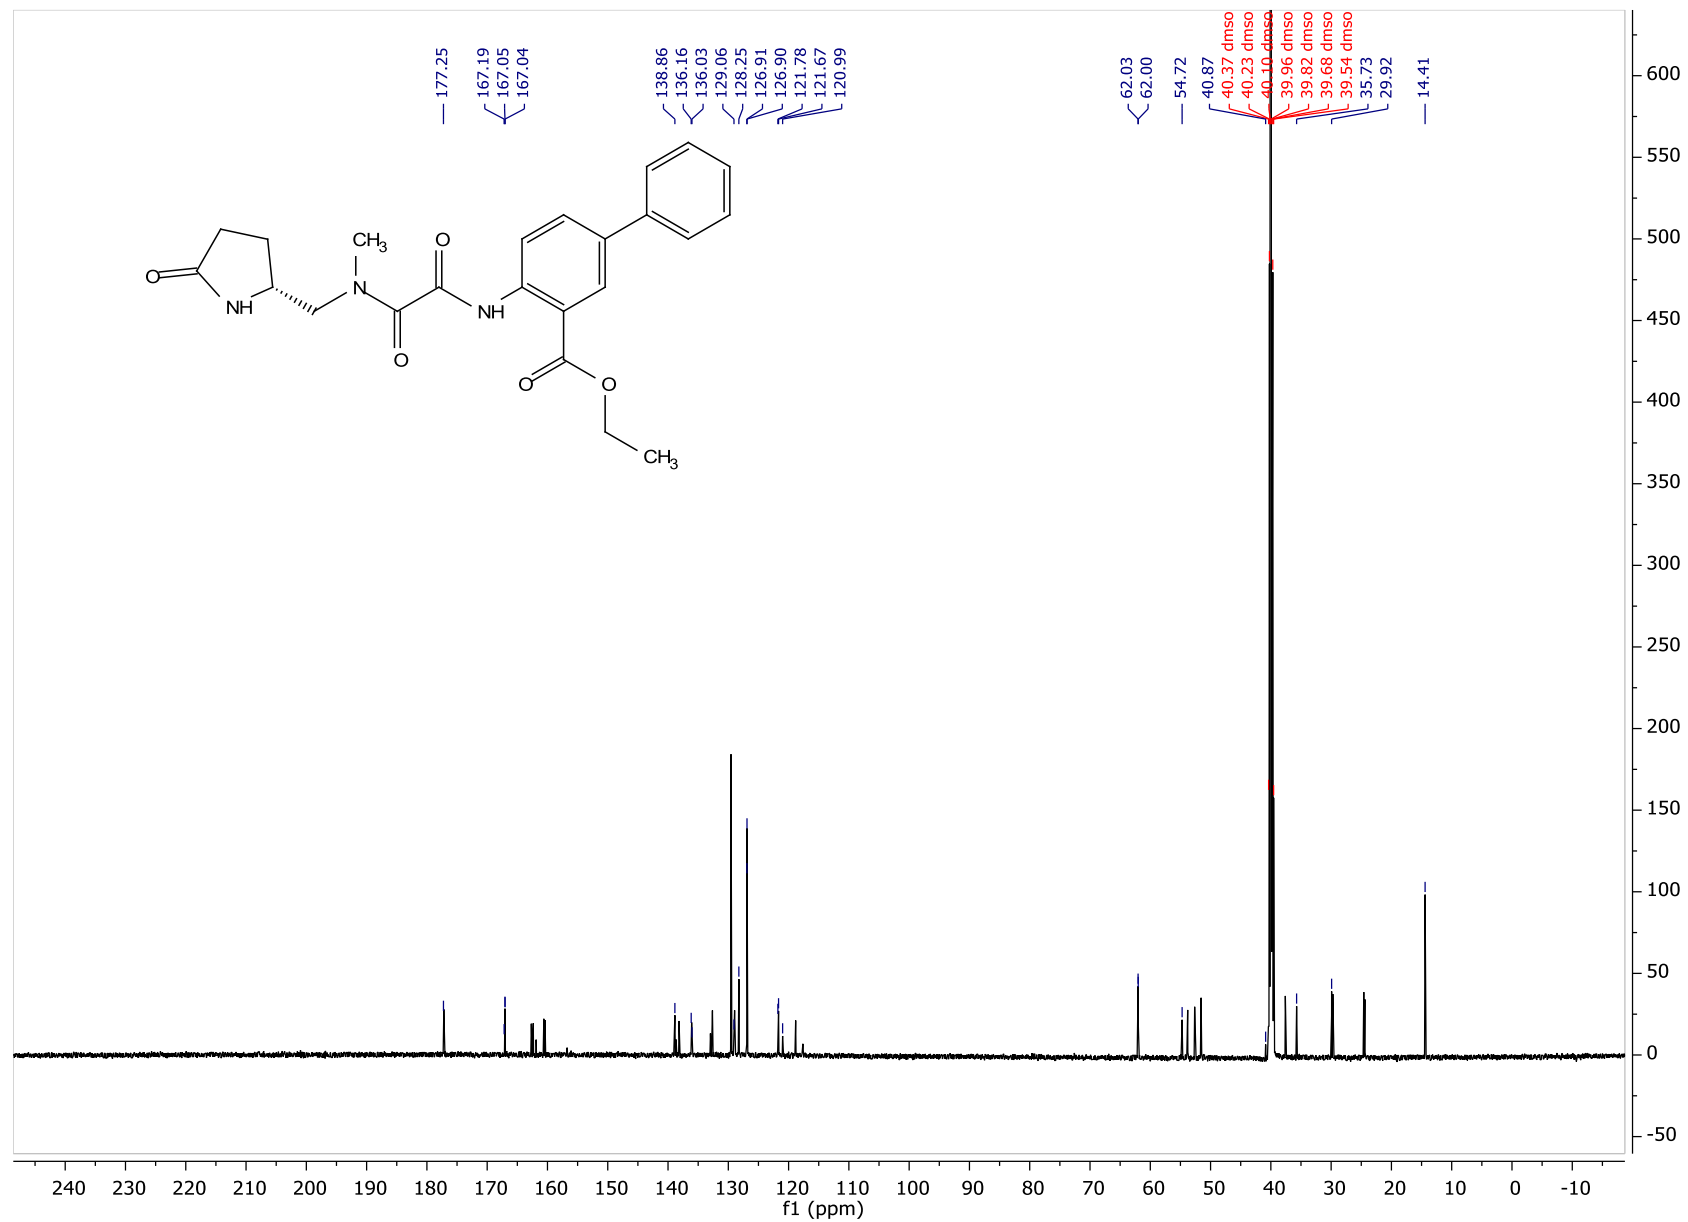

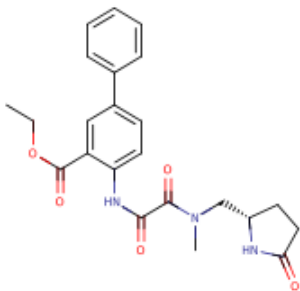

**Mol Wt** 423.46

**Exact Mass** 423.2

| # | Time  | Area% |
|---|-------|-------|
| 1 | 1.426 | 93.13 |
| 2 | 1.516 | 6.87  |

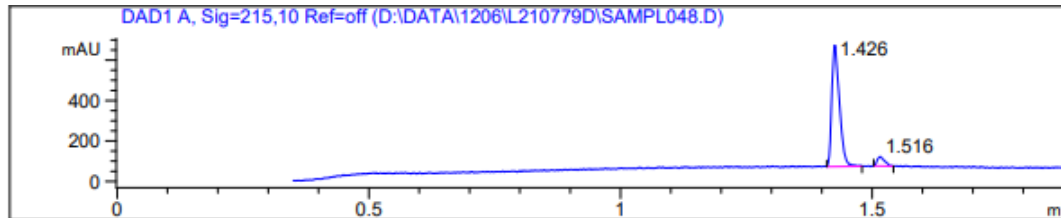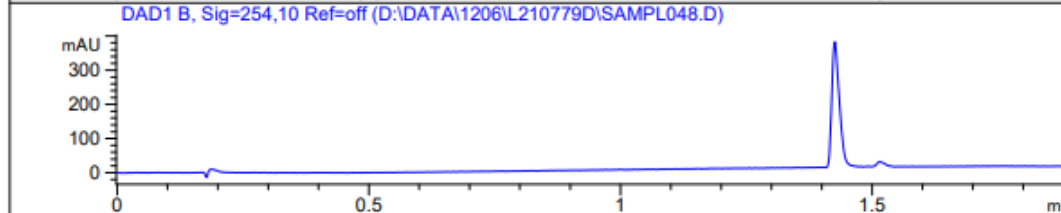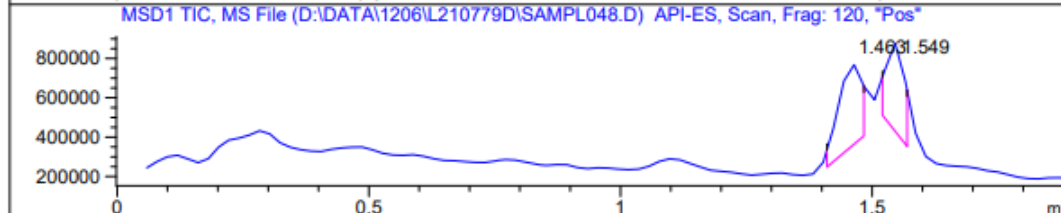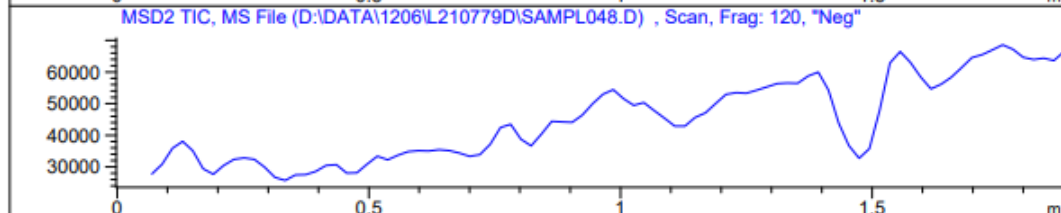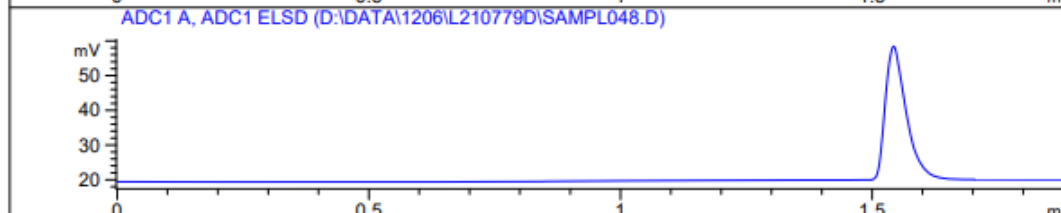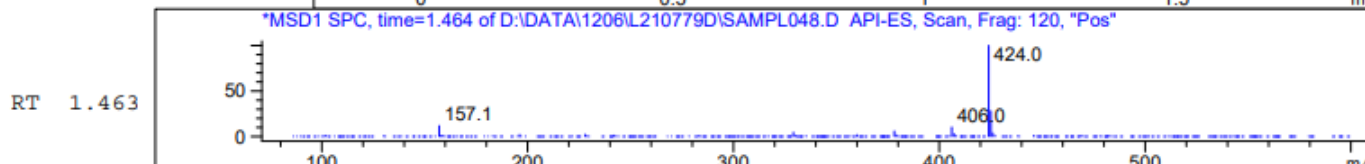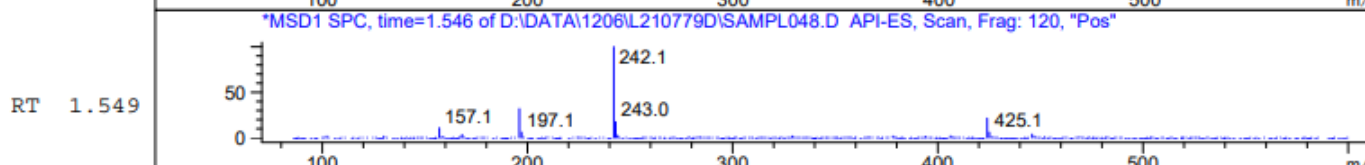

<sup>1</sup>H NMR spectrum of Z4121492251

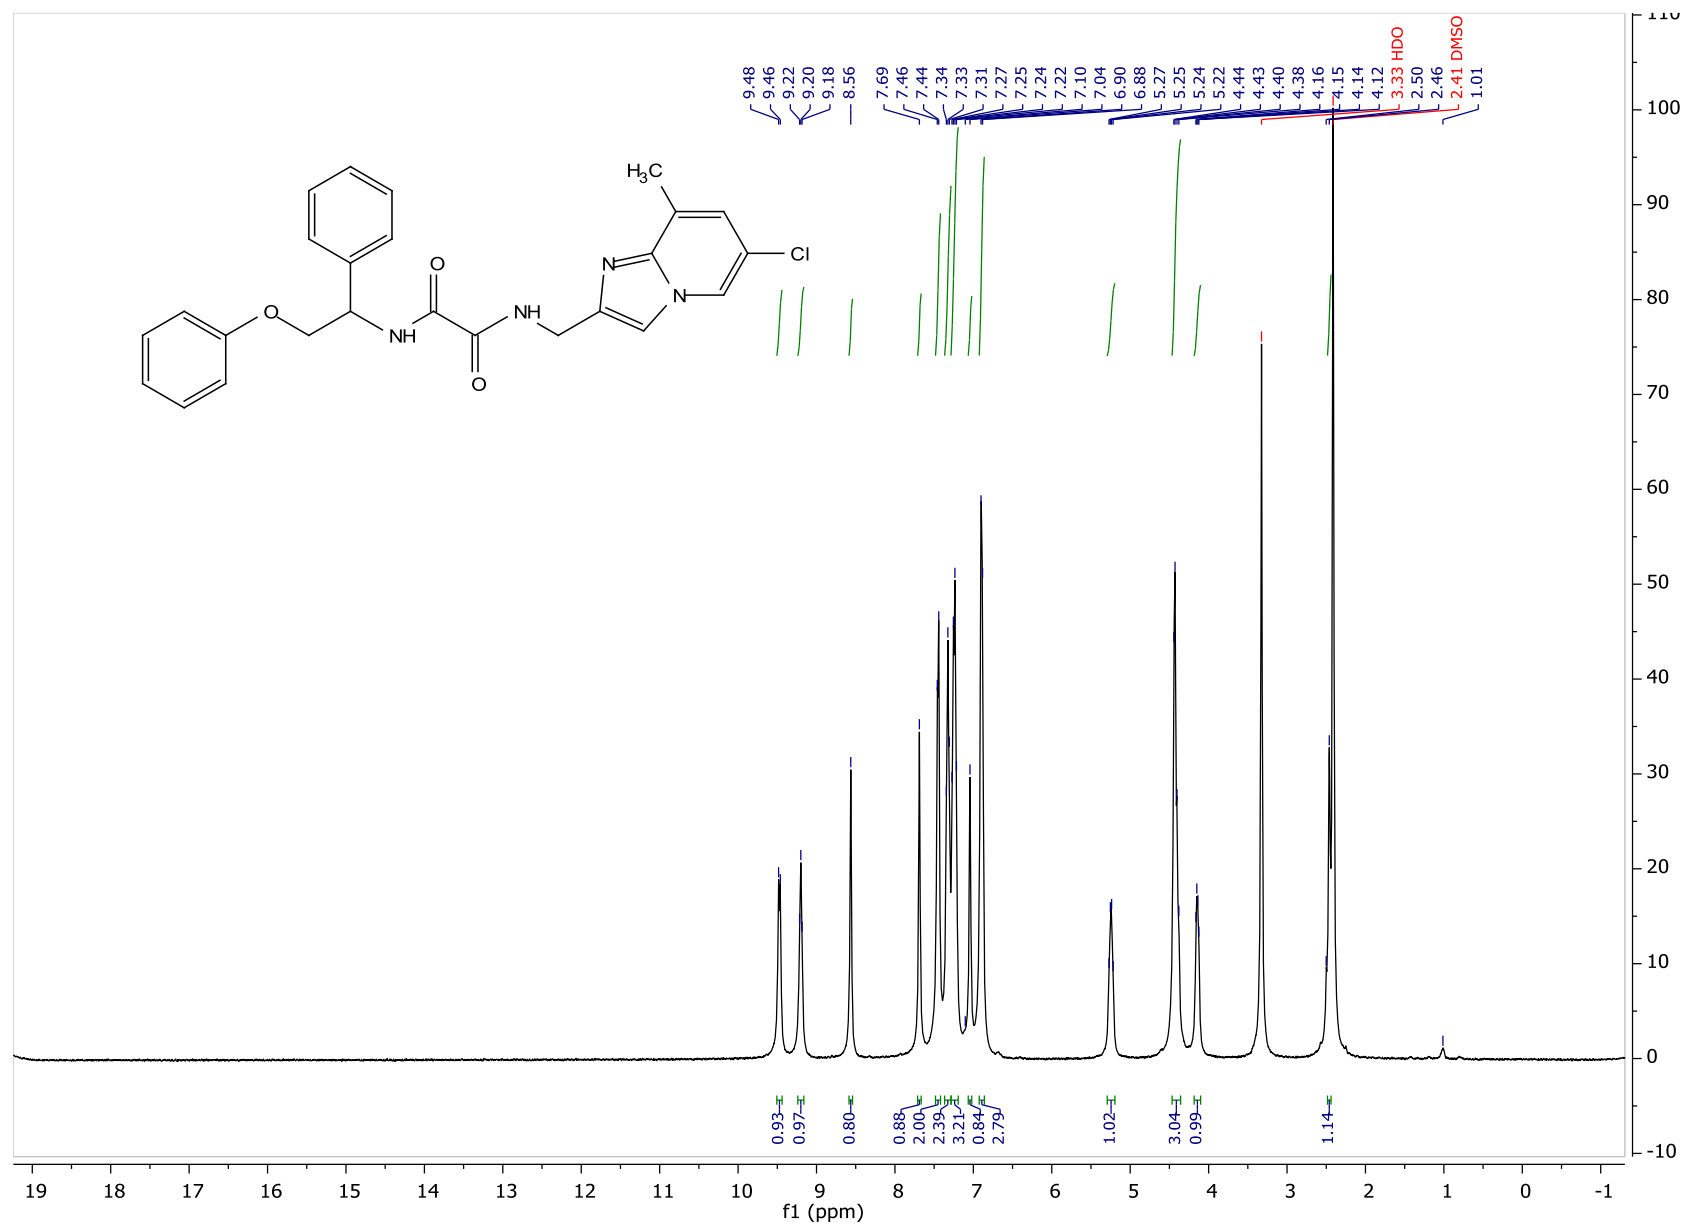

<sup>13</sup>C NMR spectrum of Z4121492251

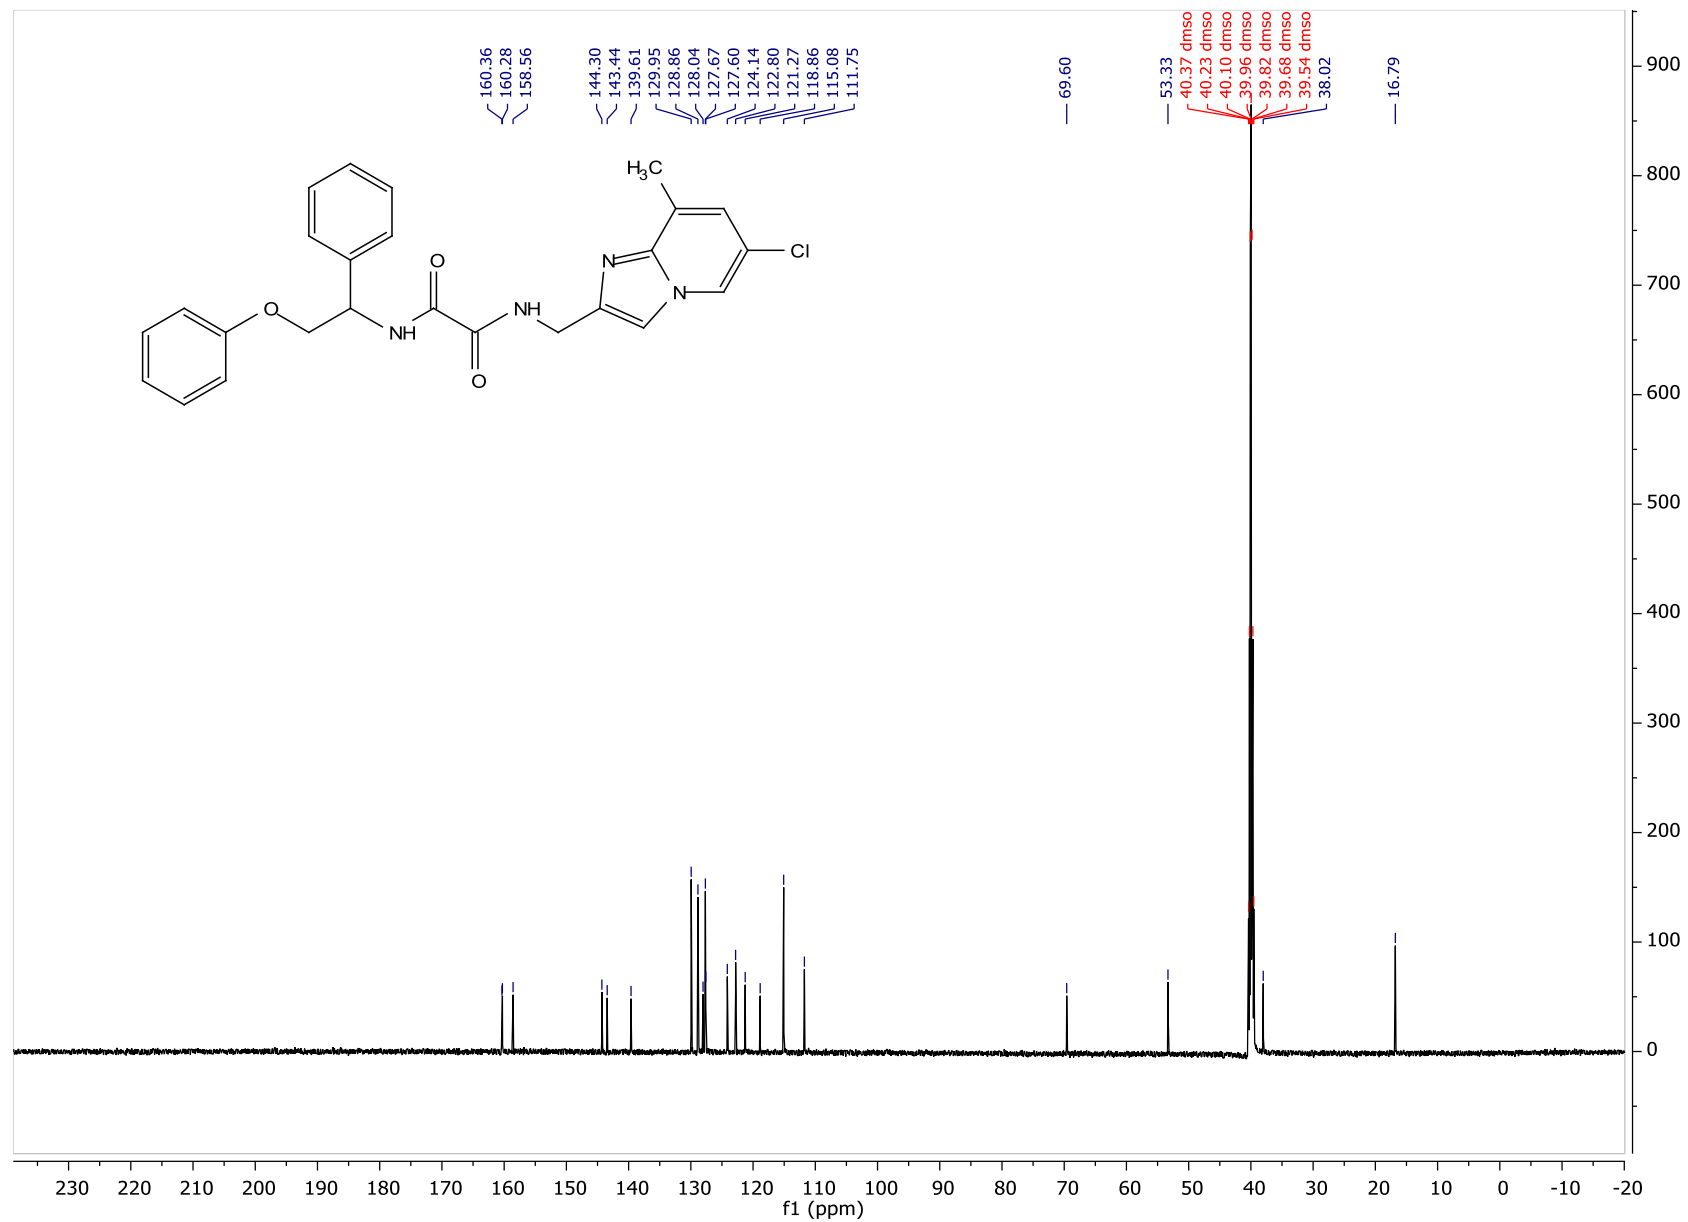

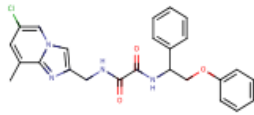

Mol Wt 462.93

Exact Mass 462.17

| # | Time  | Area% |
|---|-------|-------|
| 1 | 1.060 | 1.50  |
| 2 | 1.178 | 98.50 |

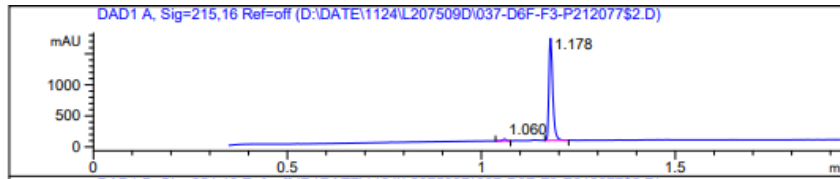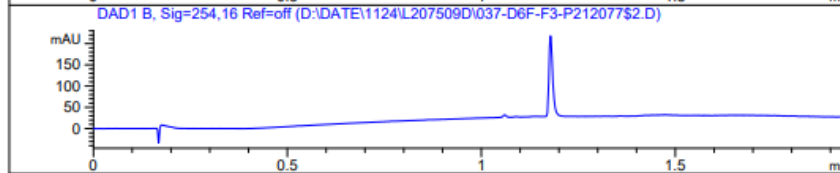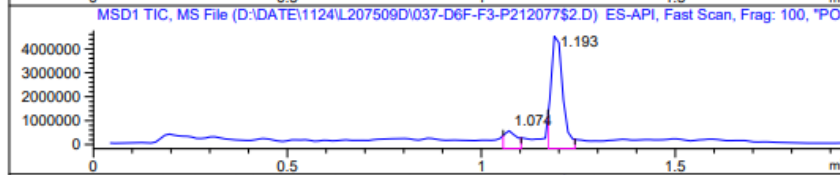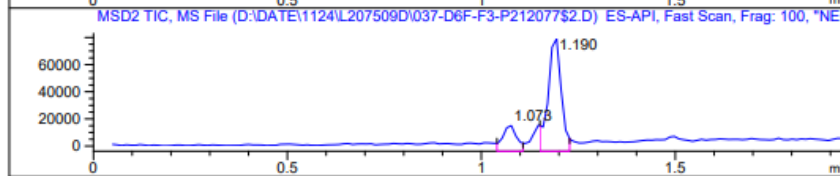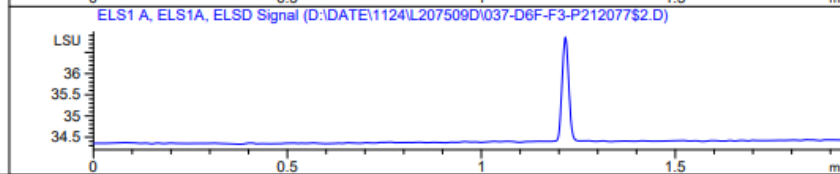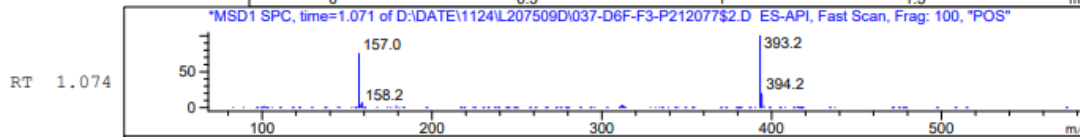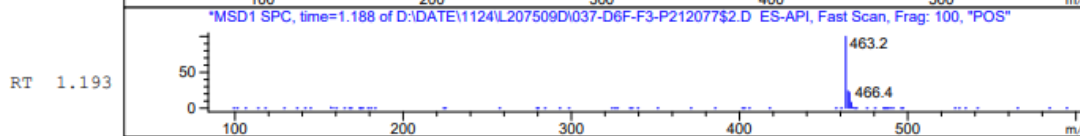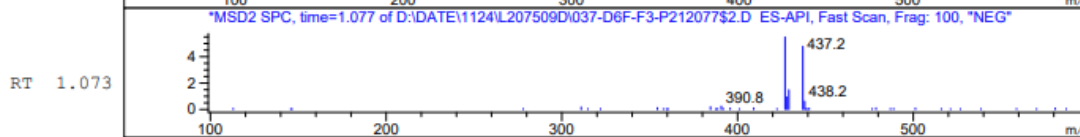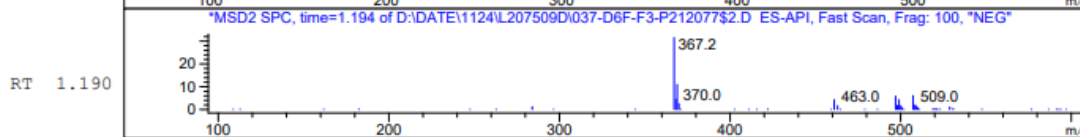

<sup>1</sup>H NMR spectrum of Z4121492273

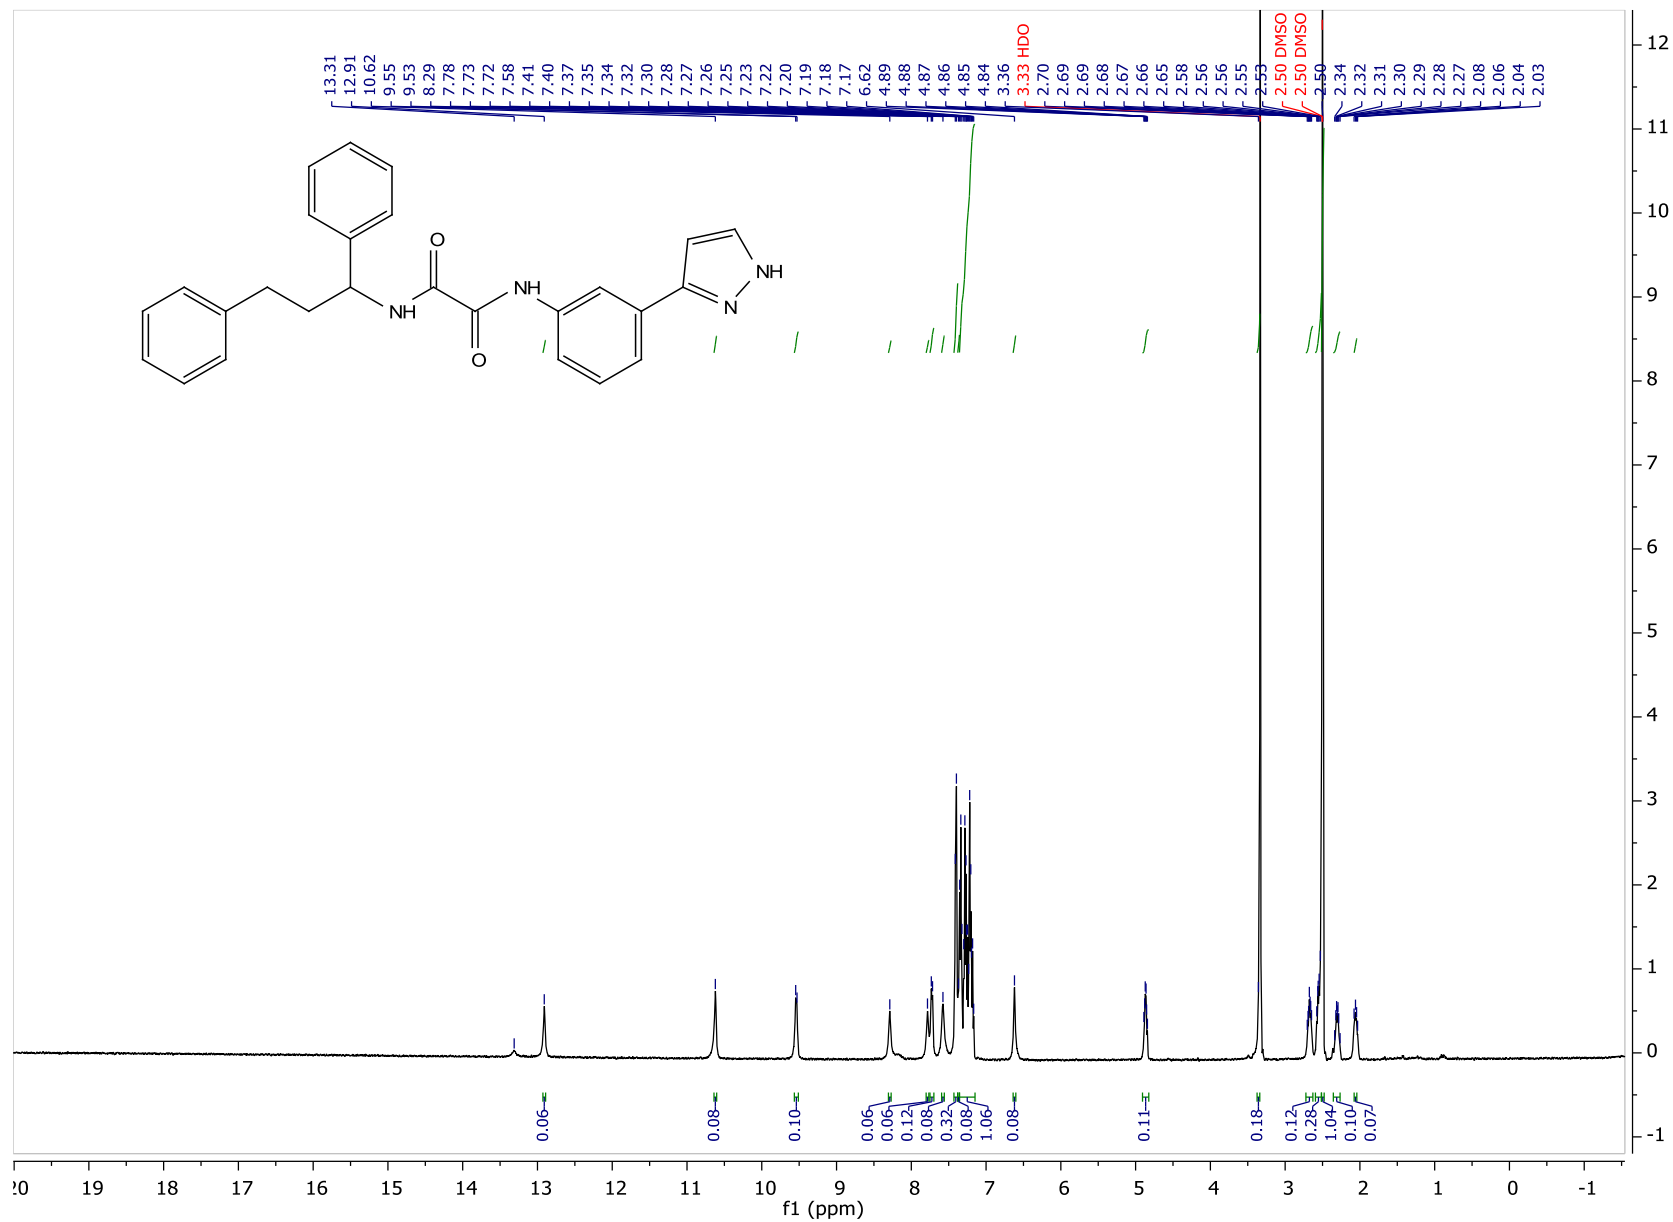

<sup>13</sup>C NMR spectrum of Z4121492273

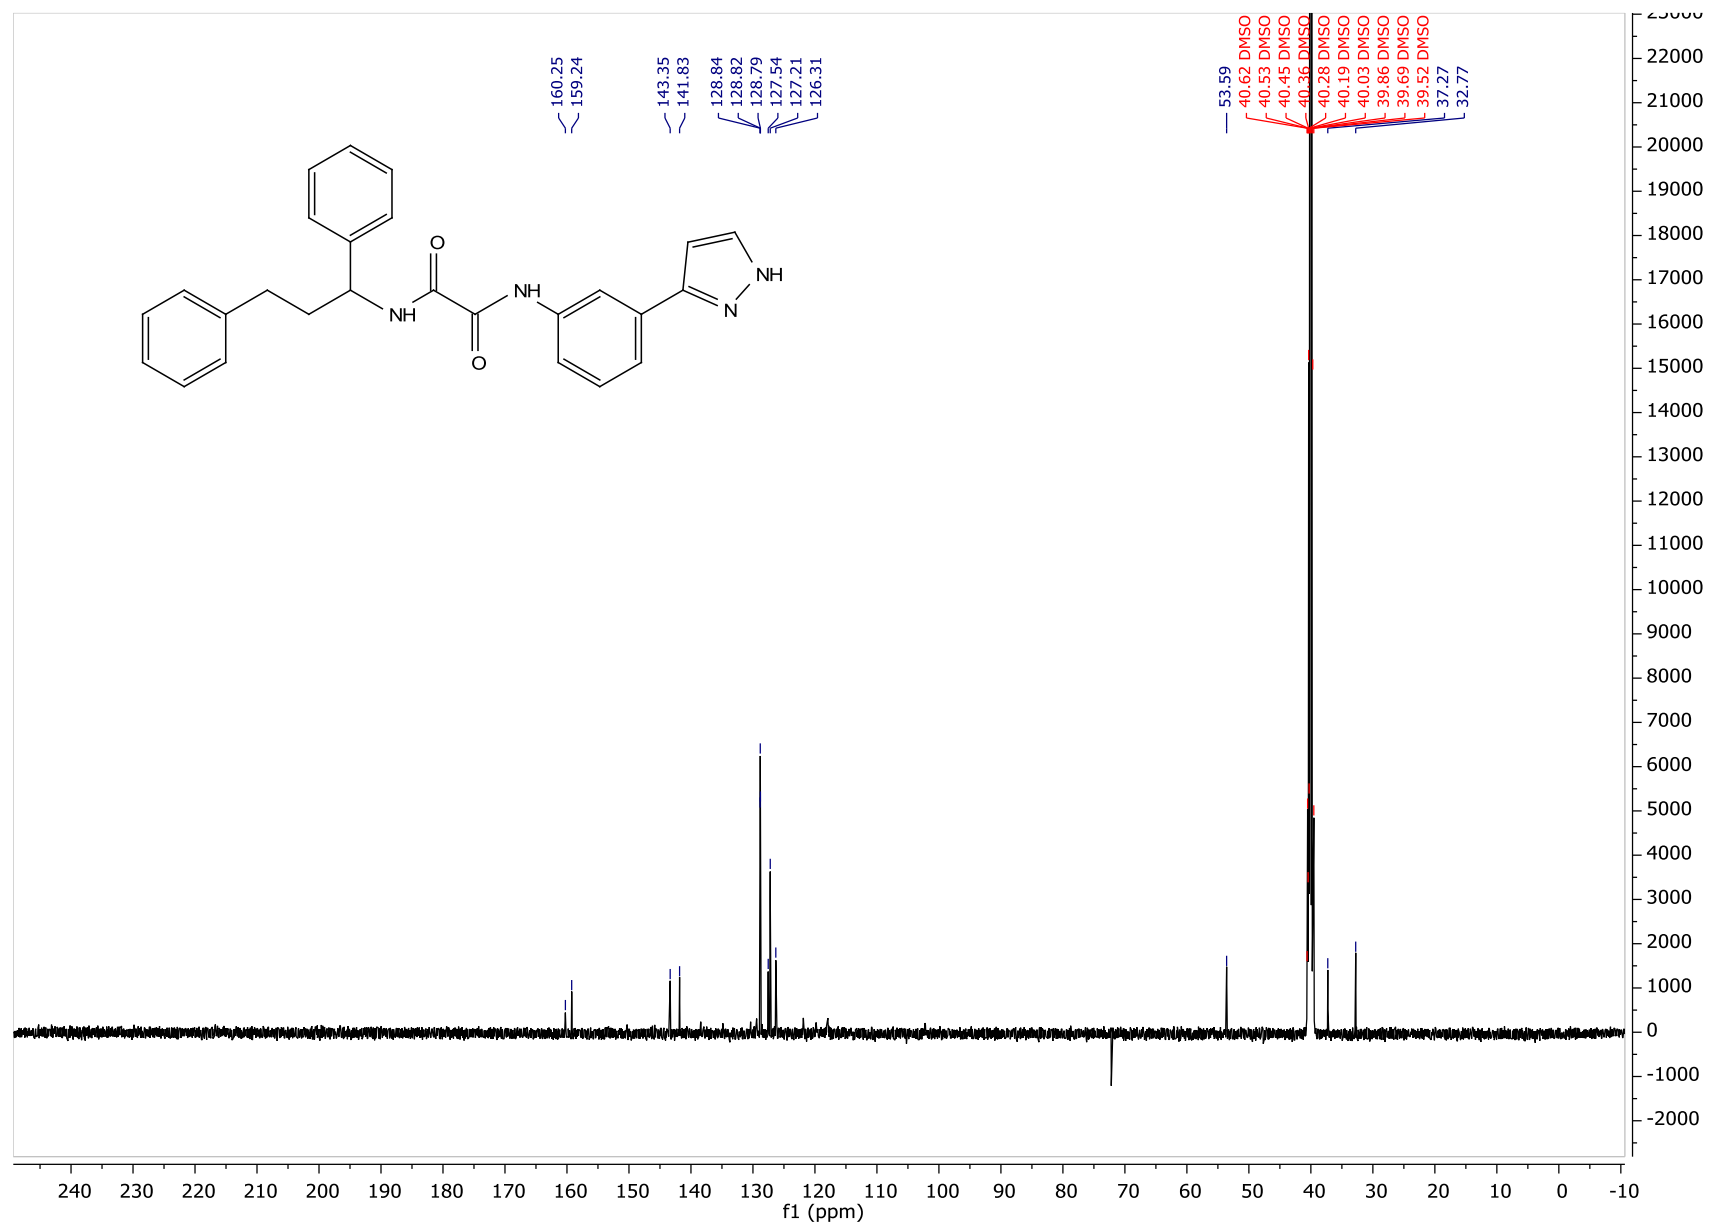

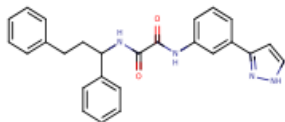

**Mol Wt** 424.49  
**Exact Mass** 424.22

| # | Time  | Area% |
|---|-------|-------|
| 1 | 1.522 | 99.06 |
| 2 | 1.638 | 0.94  |

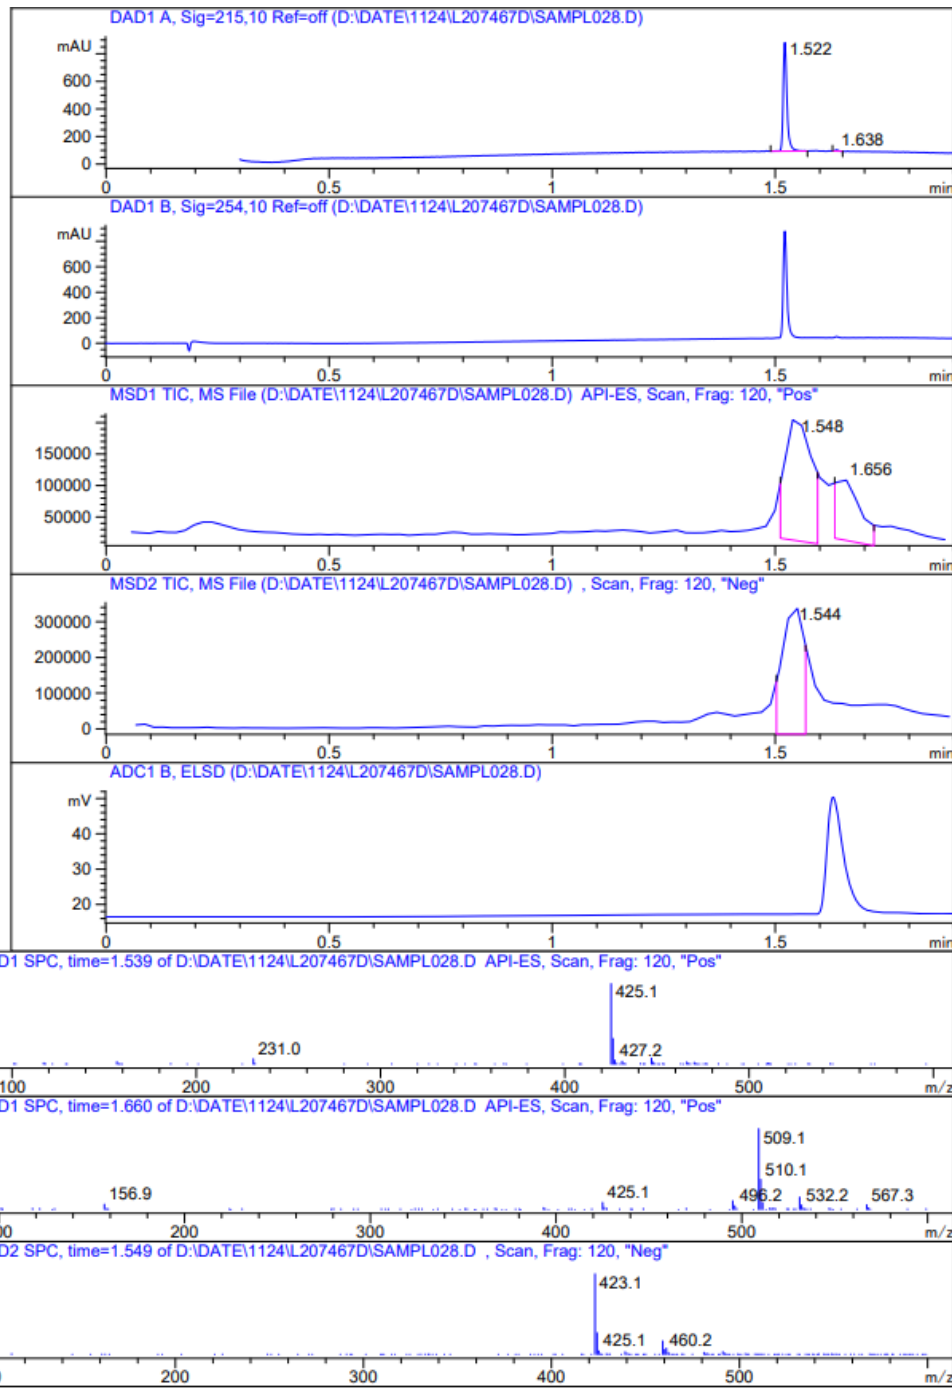



<sup>1</sup>H NMR spectrum of Z4121492325

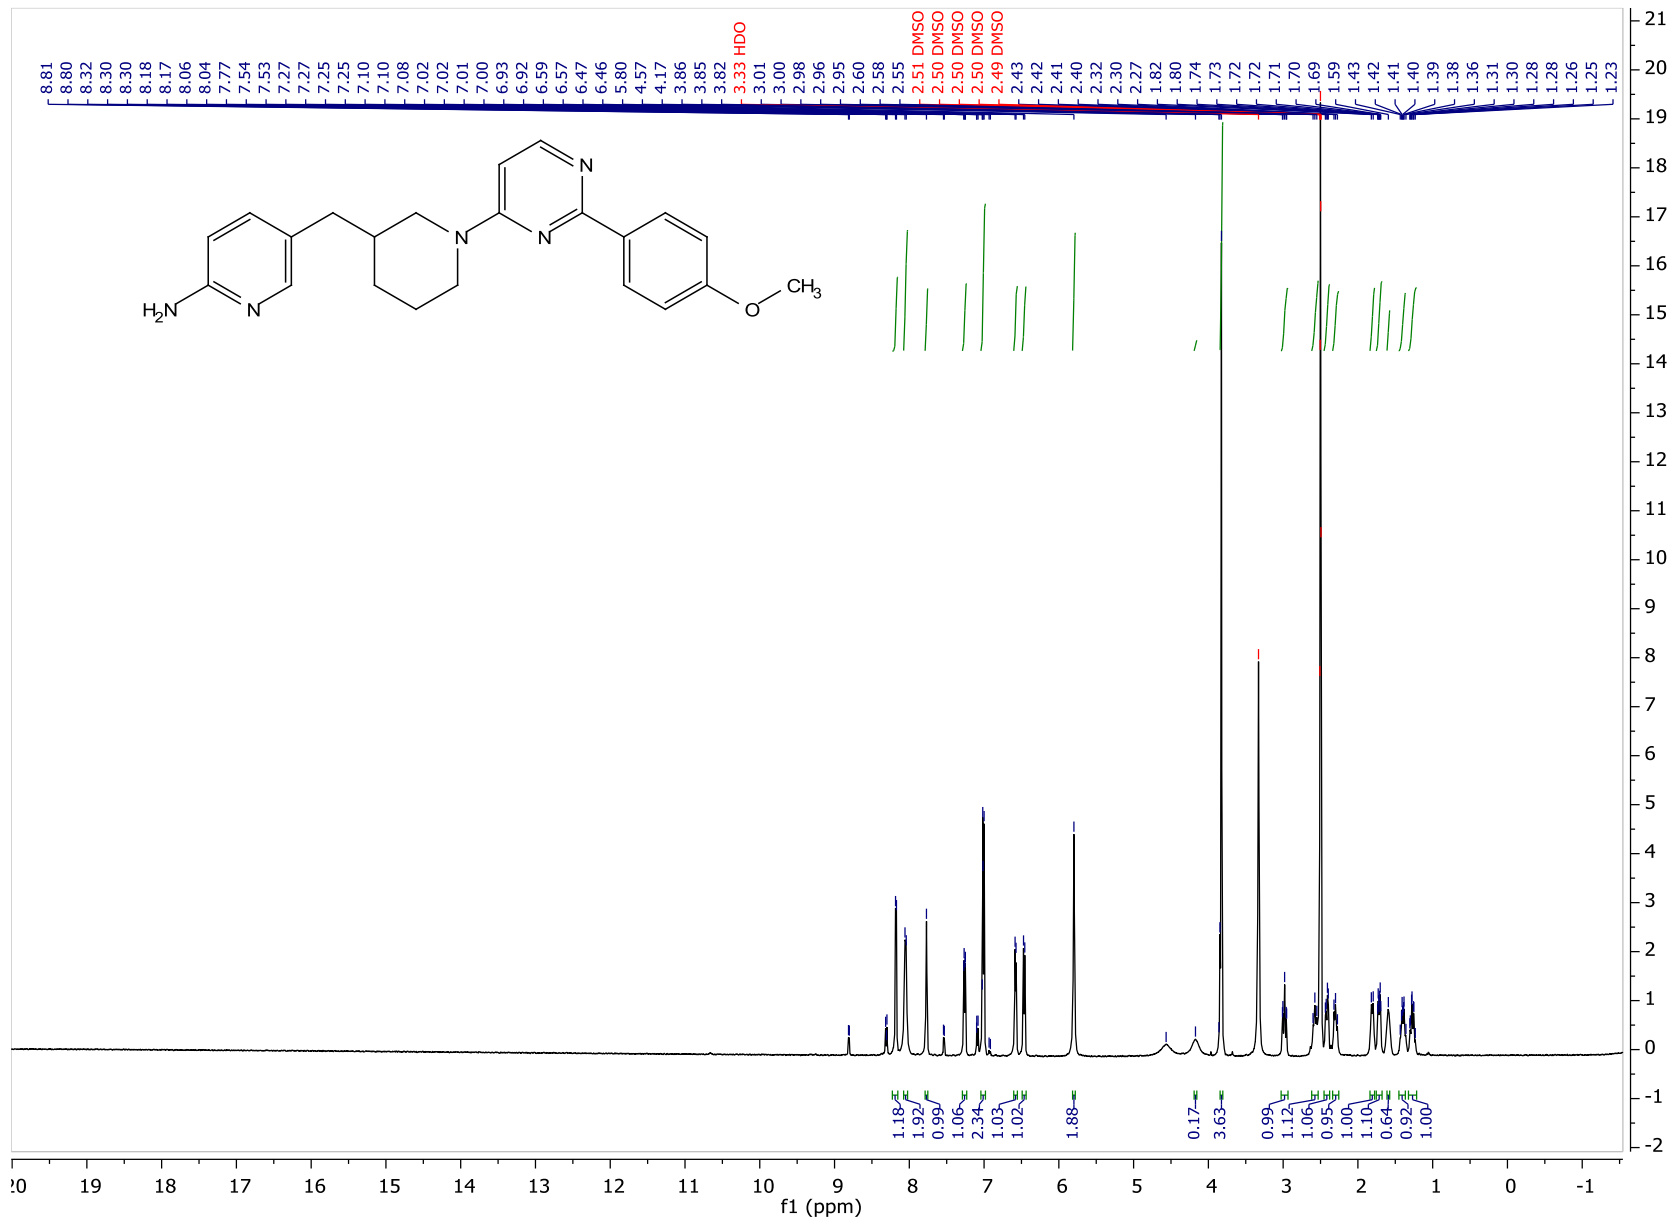

<sup>13</sup>C NMR spectrum of Z4121492325

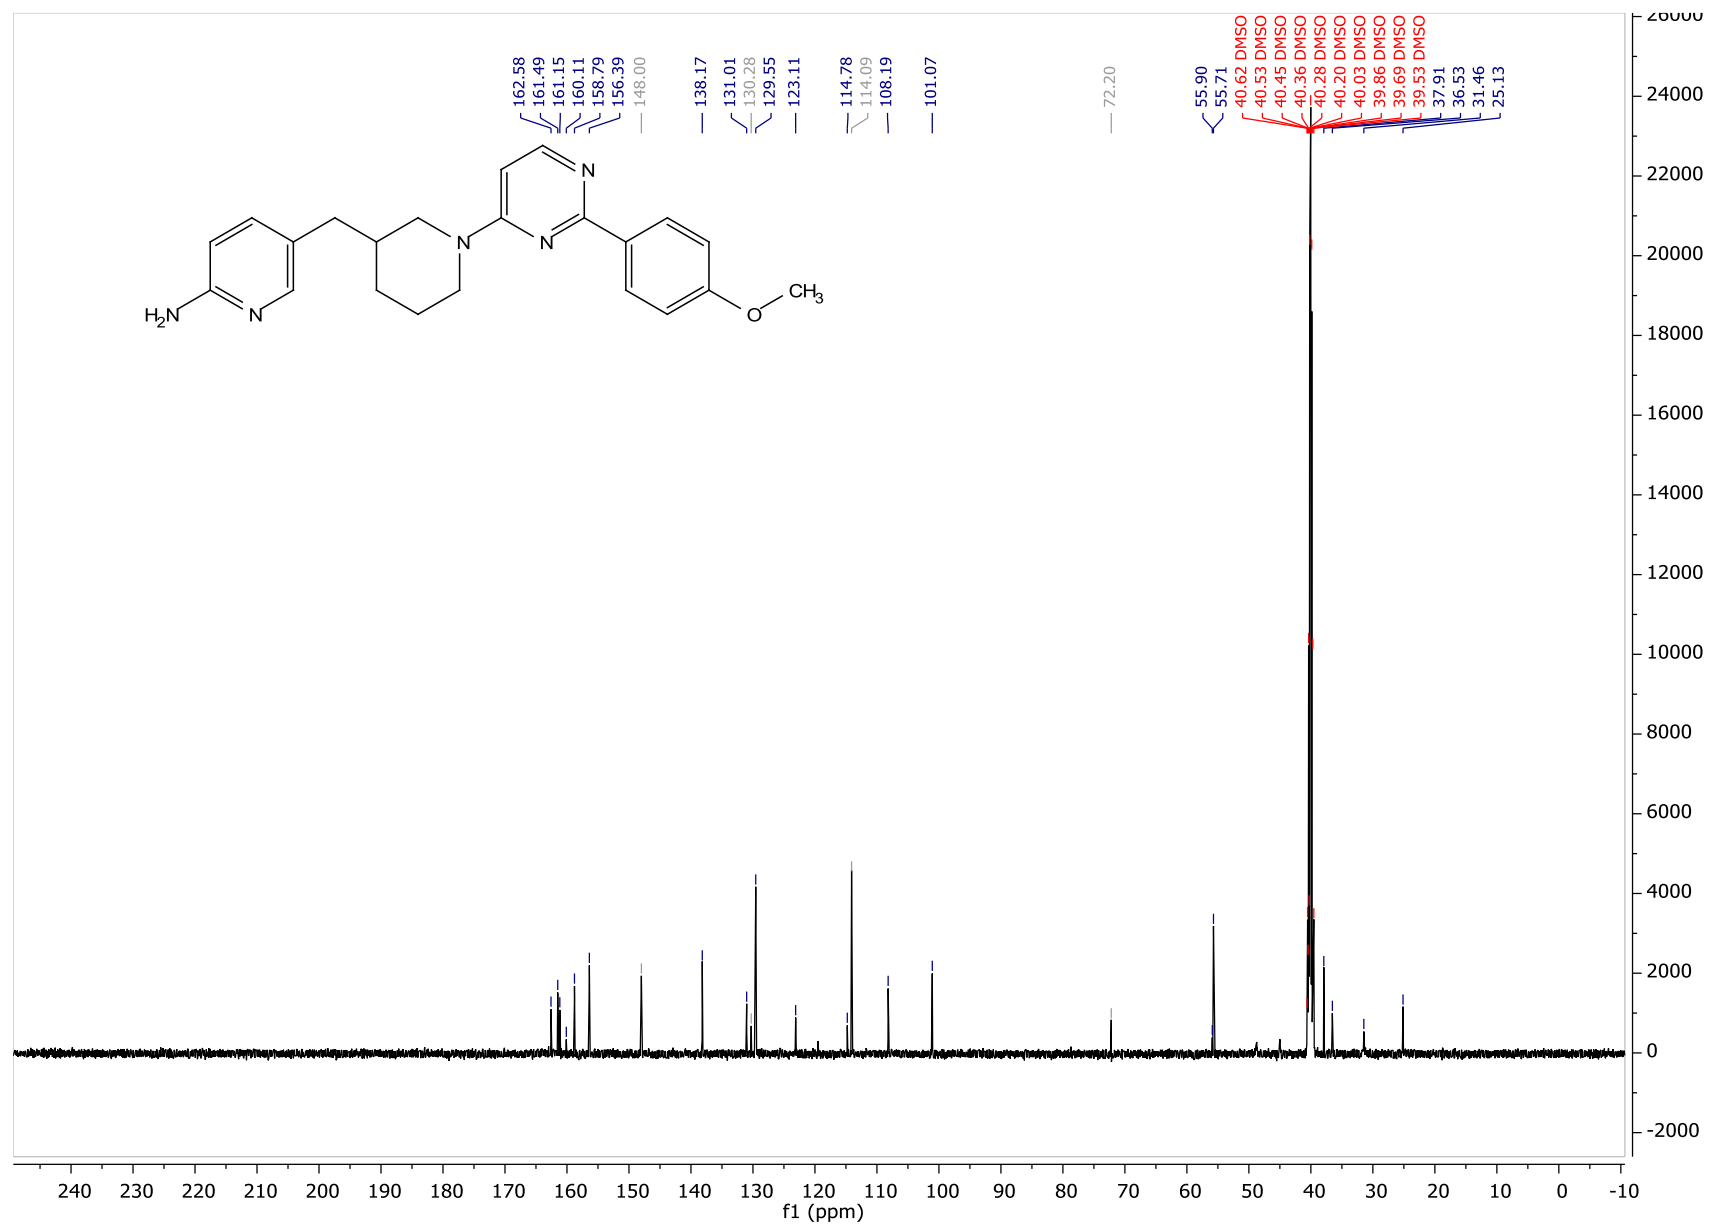

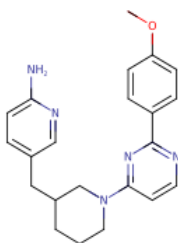

Mol Wt 375.47  
 Exact Mass 375.24

| # | Time  | Area% |
|---|-------|-------|
| 1 | 0.835 | 91.05 |
| 2 | 1.053 | 2.47  |
| 3 | 1.452 | 6.48  |

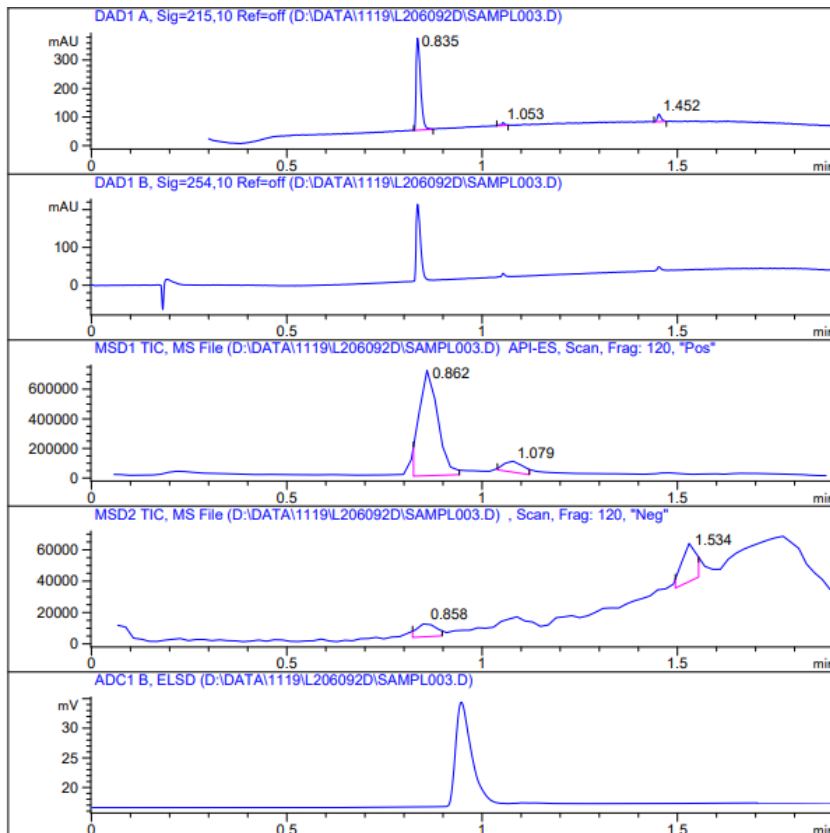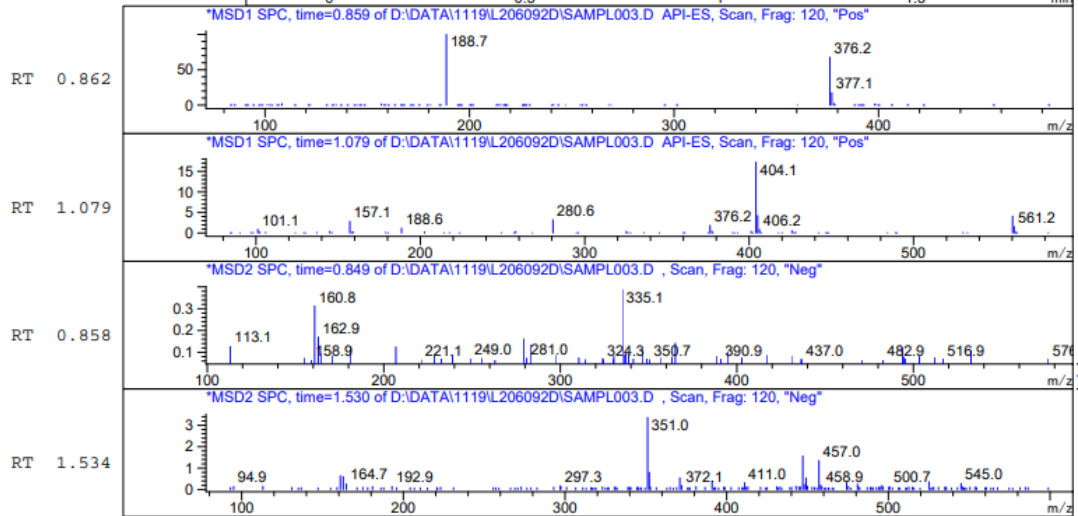

<sup>1</sup>H NMR spectrum of Z4121492326

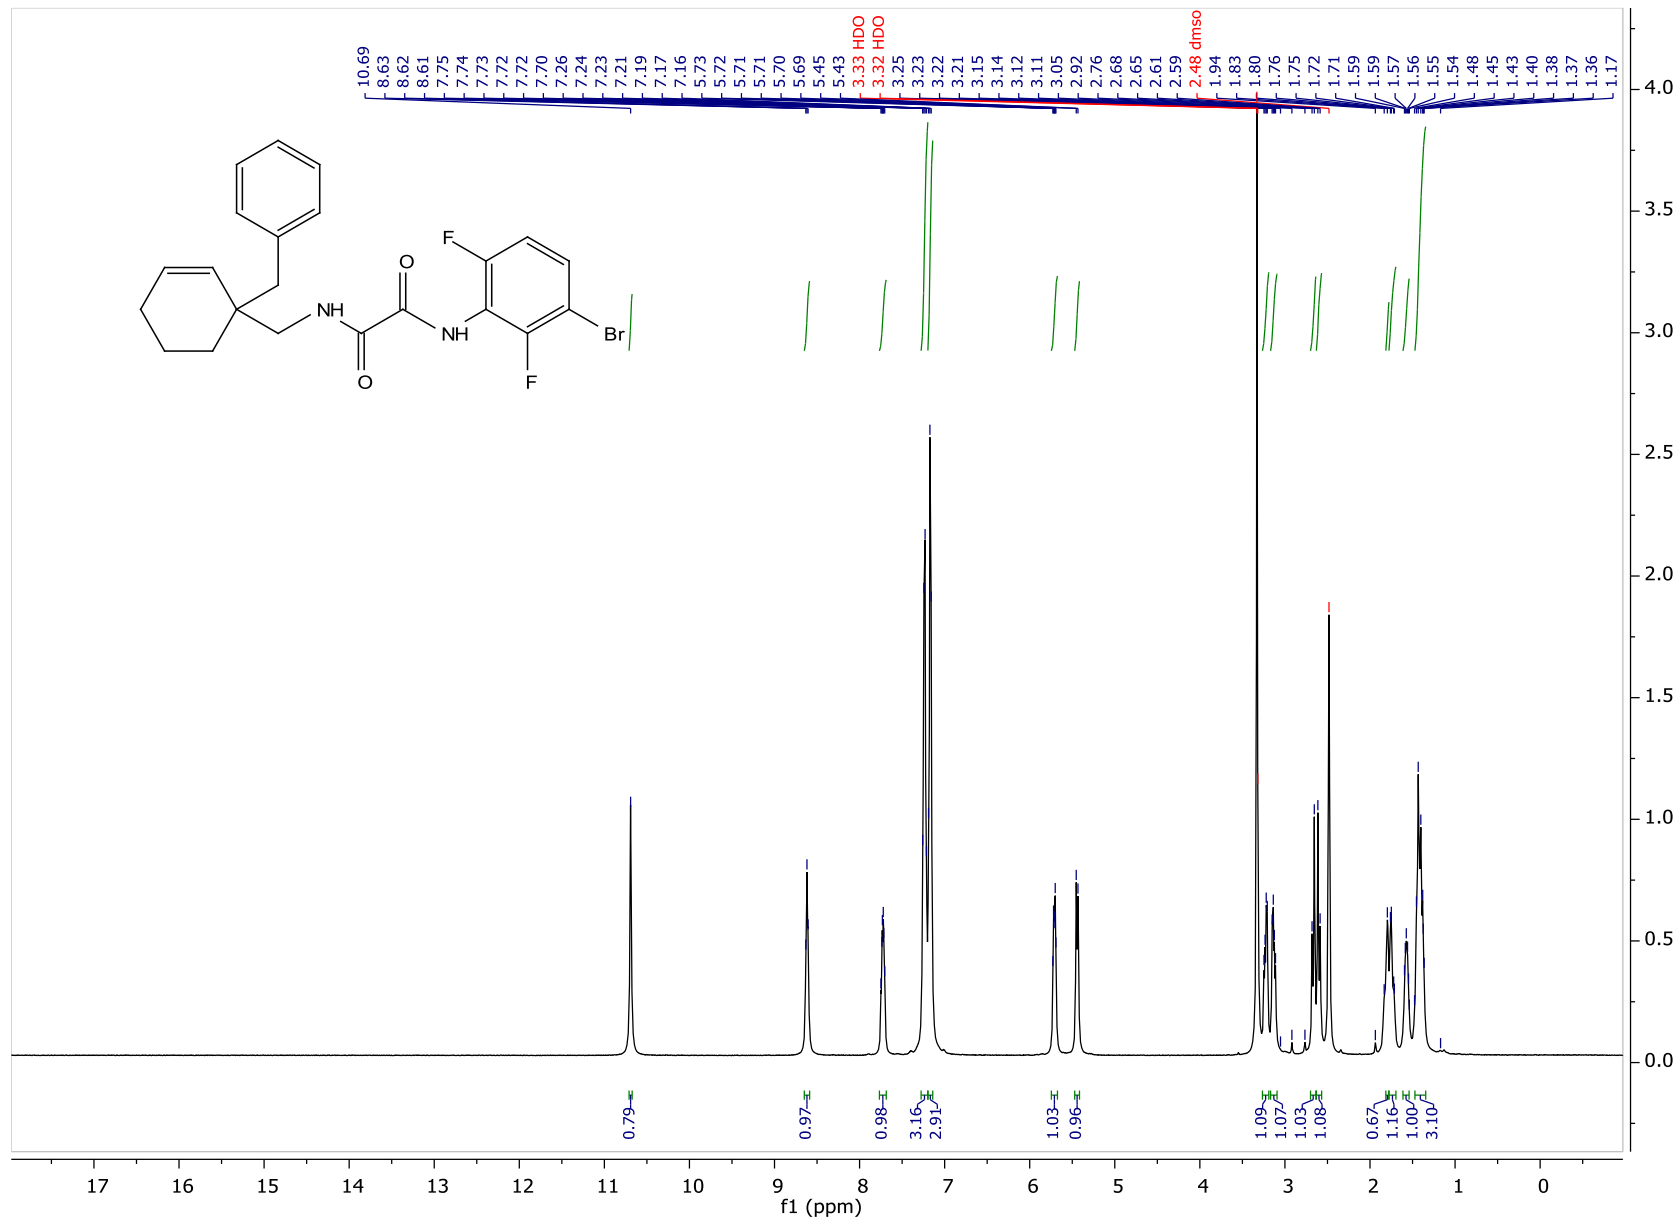

<sup>13</sup>C NMR spectrum of Z4121492326

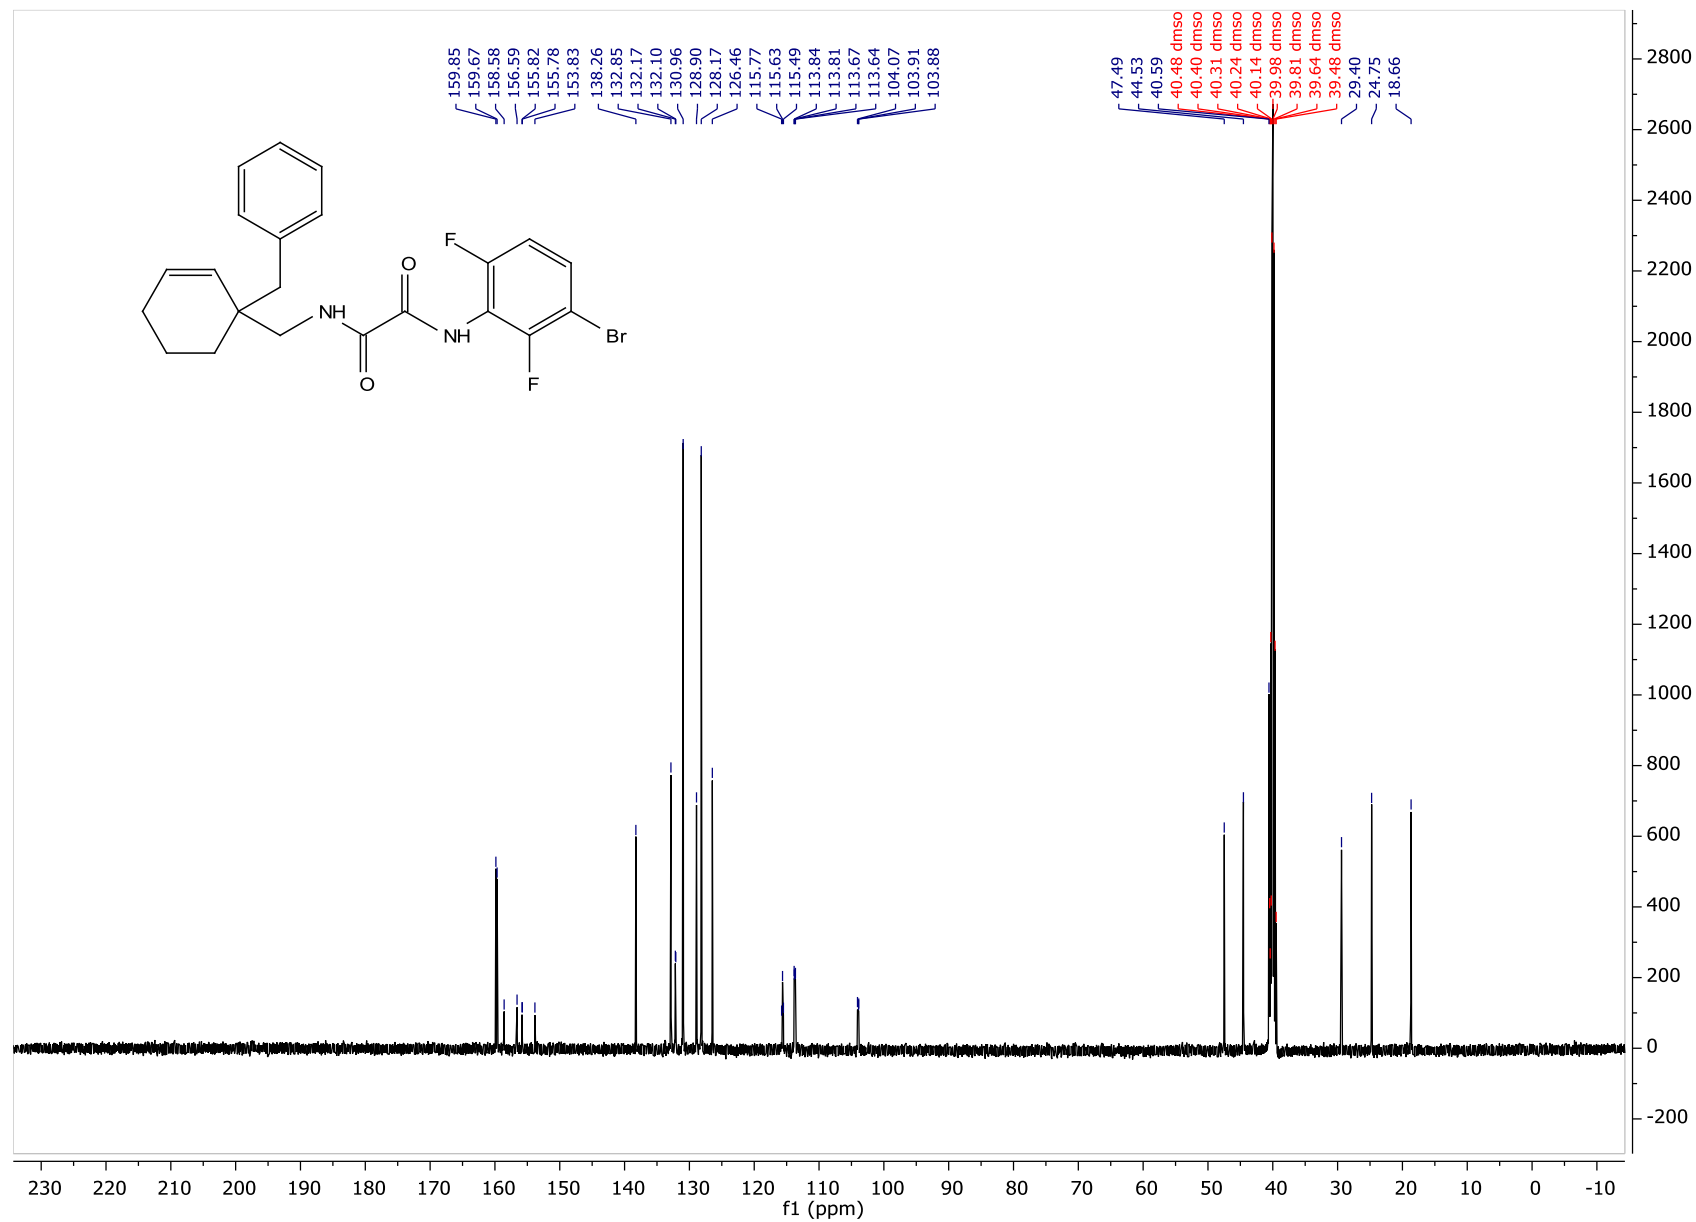

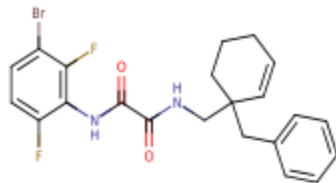

**Mol Wt** 463.32  
**Exact Mass** 464.11

| # | Time  | Area%  |
|---|-------|--------|
| 1 | 1.669 | 100.00 |

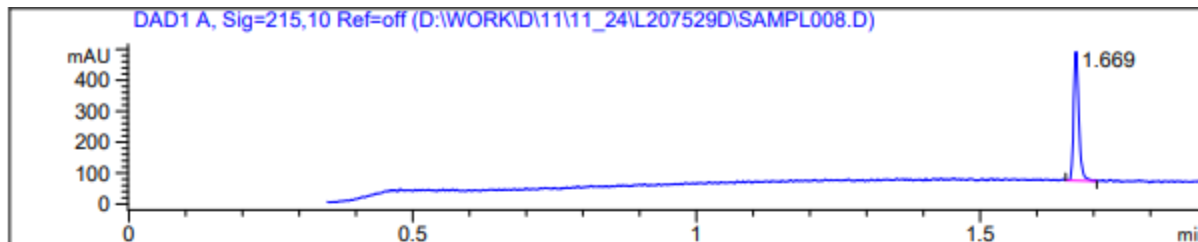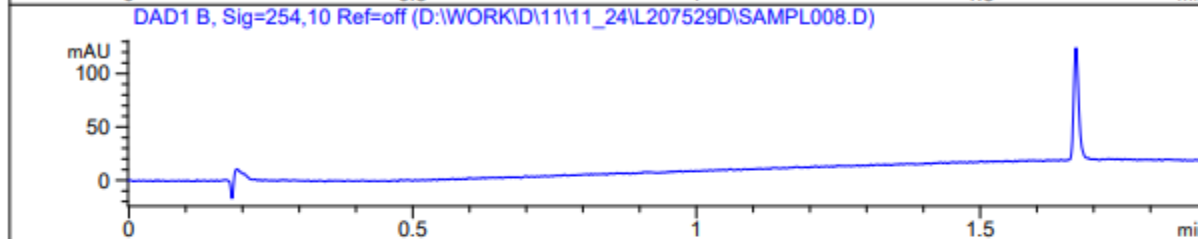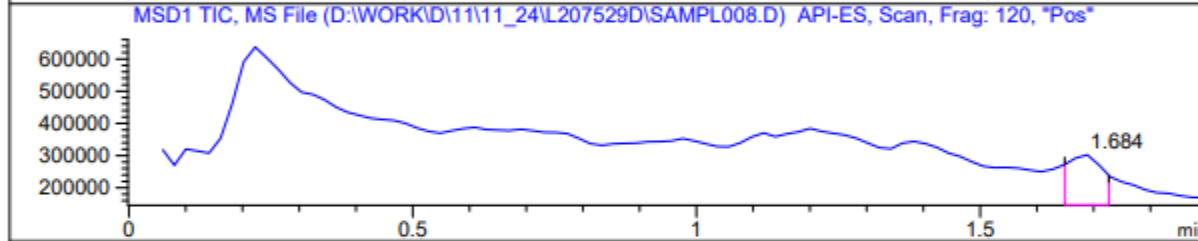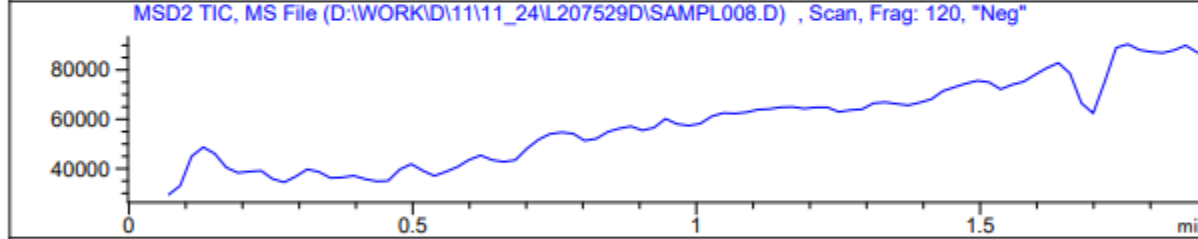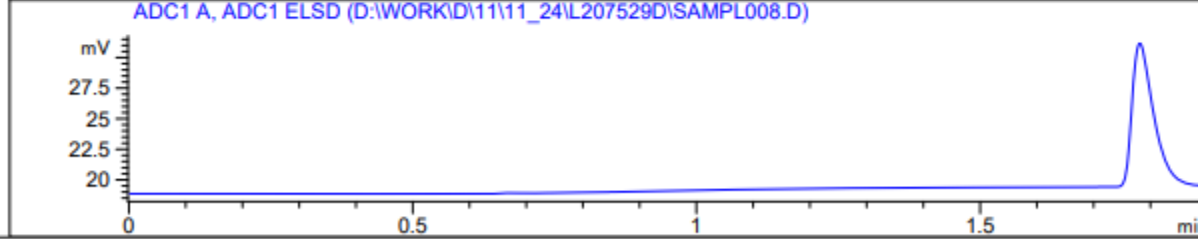

RT 1.684

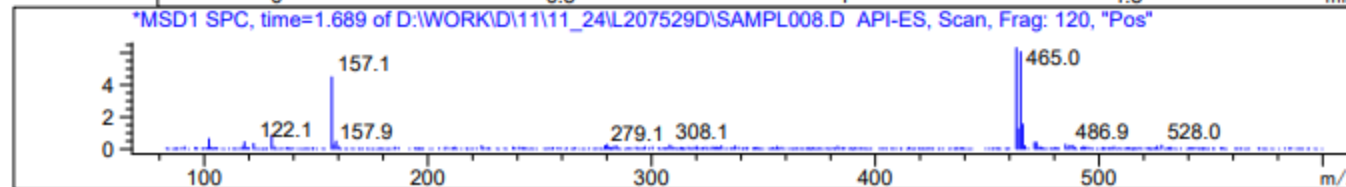

<sup>1</sup>H NMR spectrum of Z4121492388

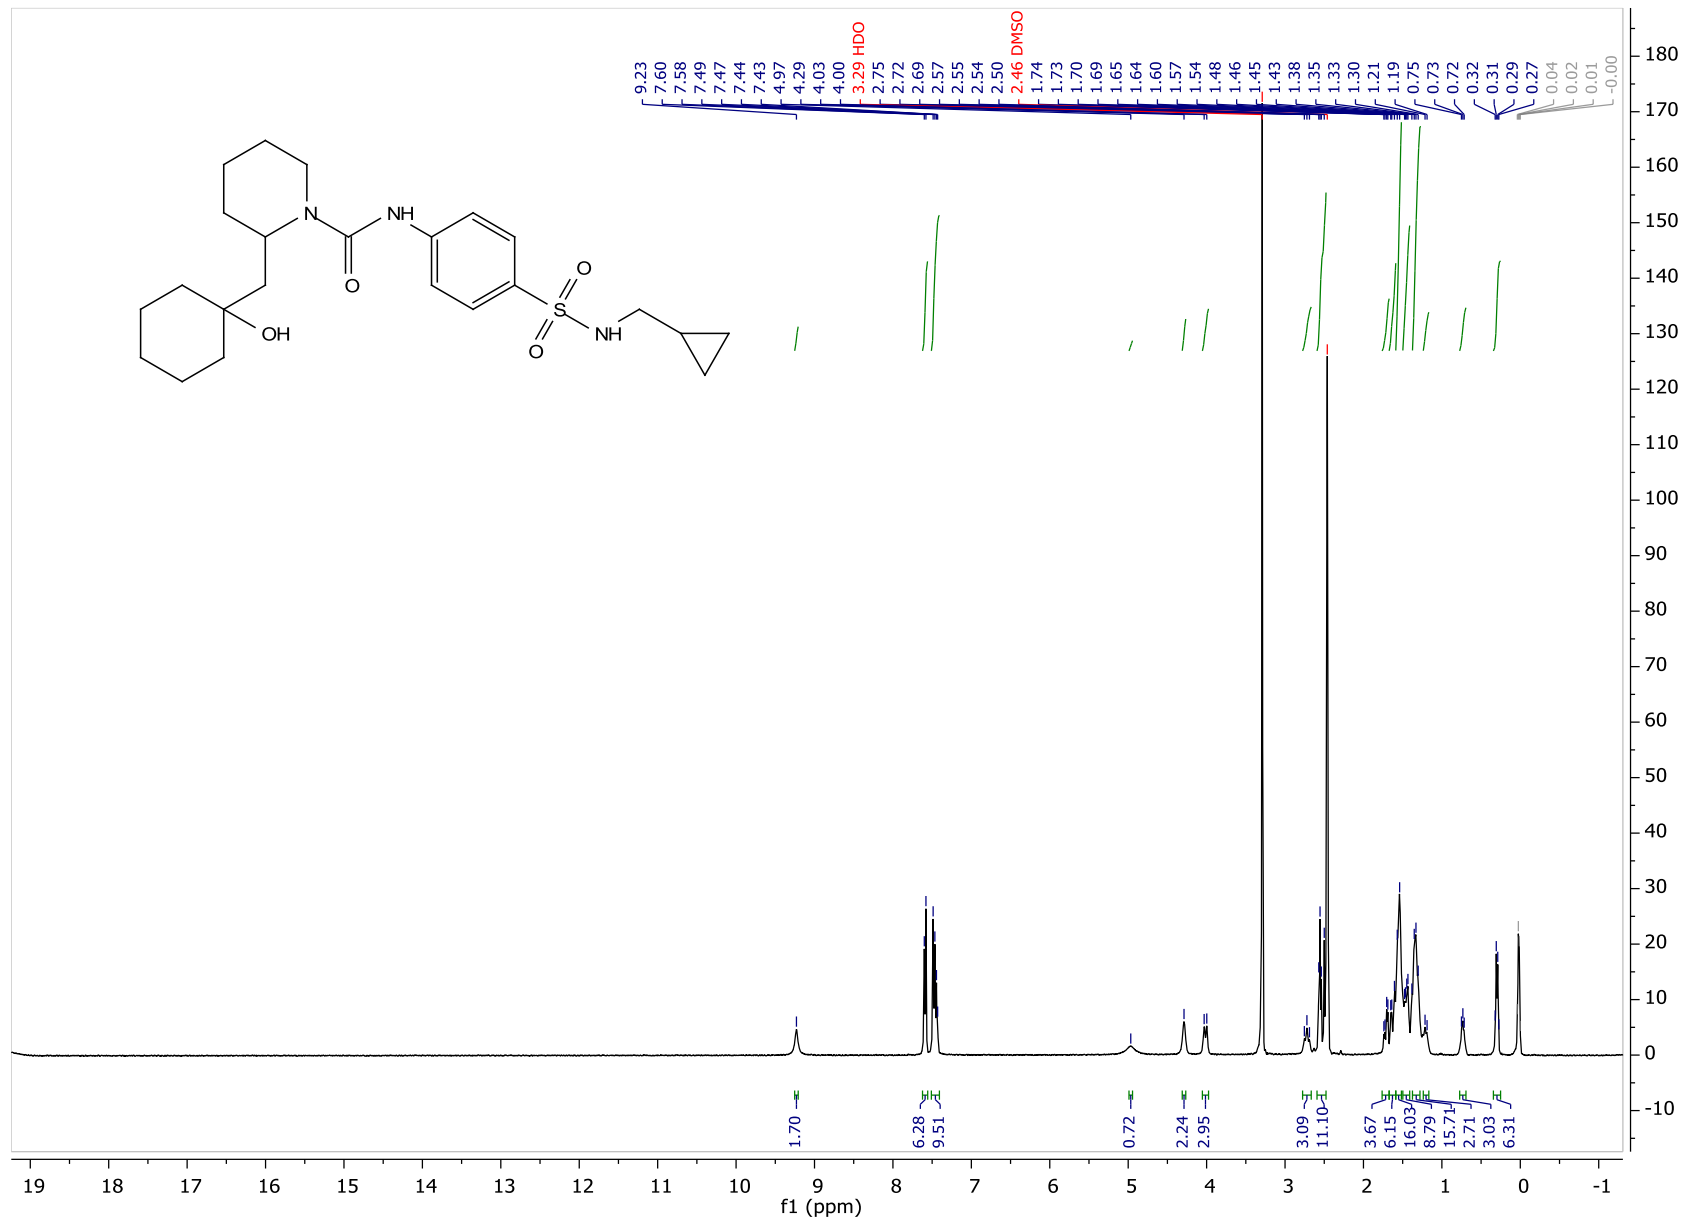

<sup>13</sup>C NMR spectrum of Z4121492388

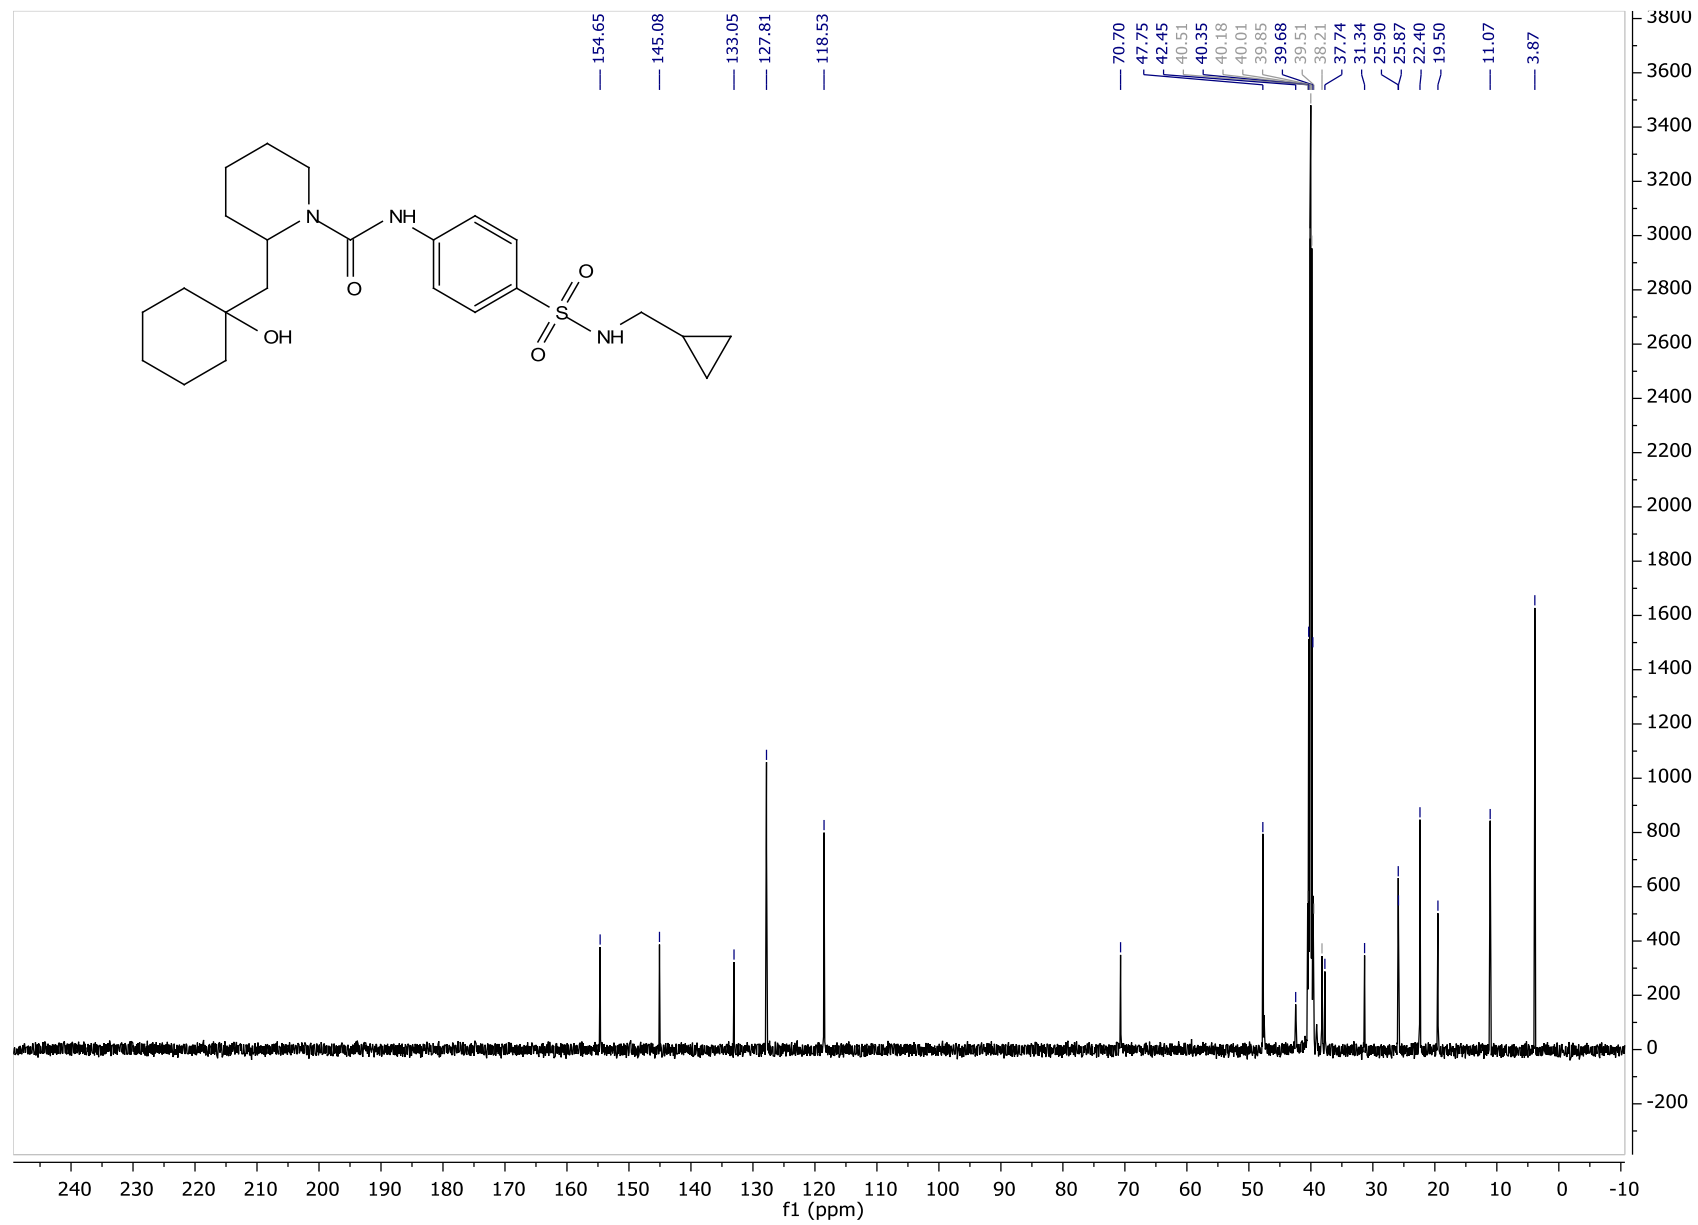



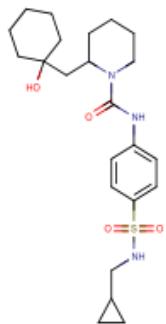

**Mol Wt** 449.61  
**Exact Mass** 449.28

| # | Time  | Area%  |
|---|-------|--------|
| 1 | 1.381 | 100.00 |

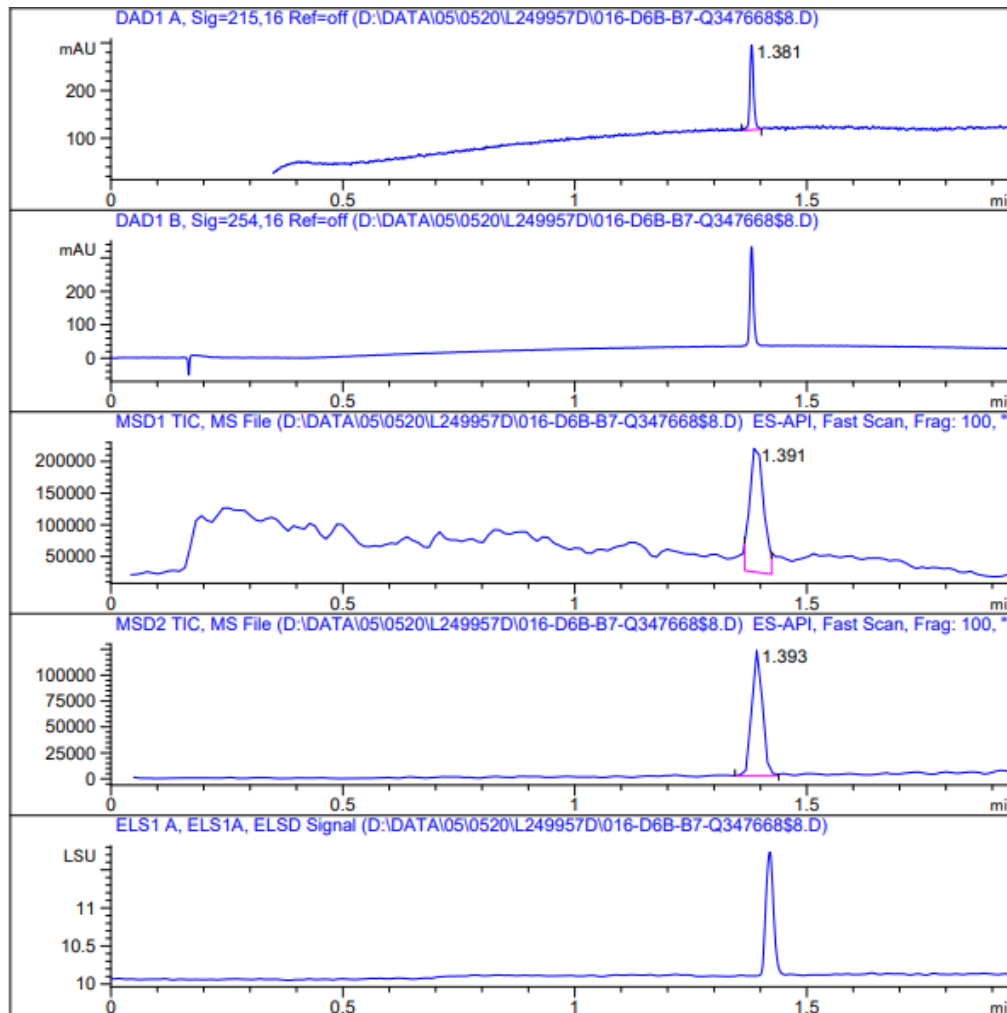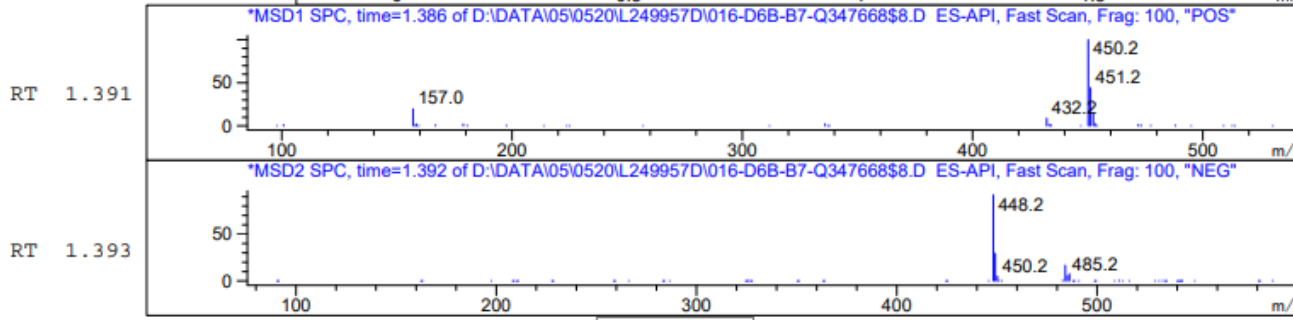

<sup>1</sup>H NMR spectrum of Z4121492409

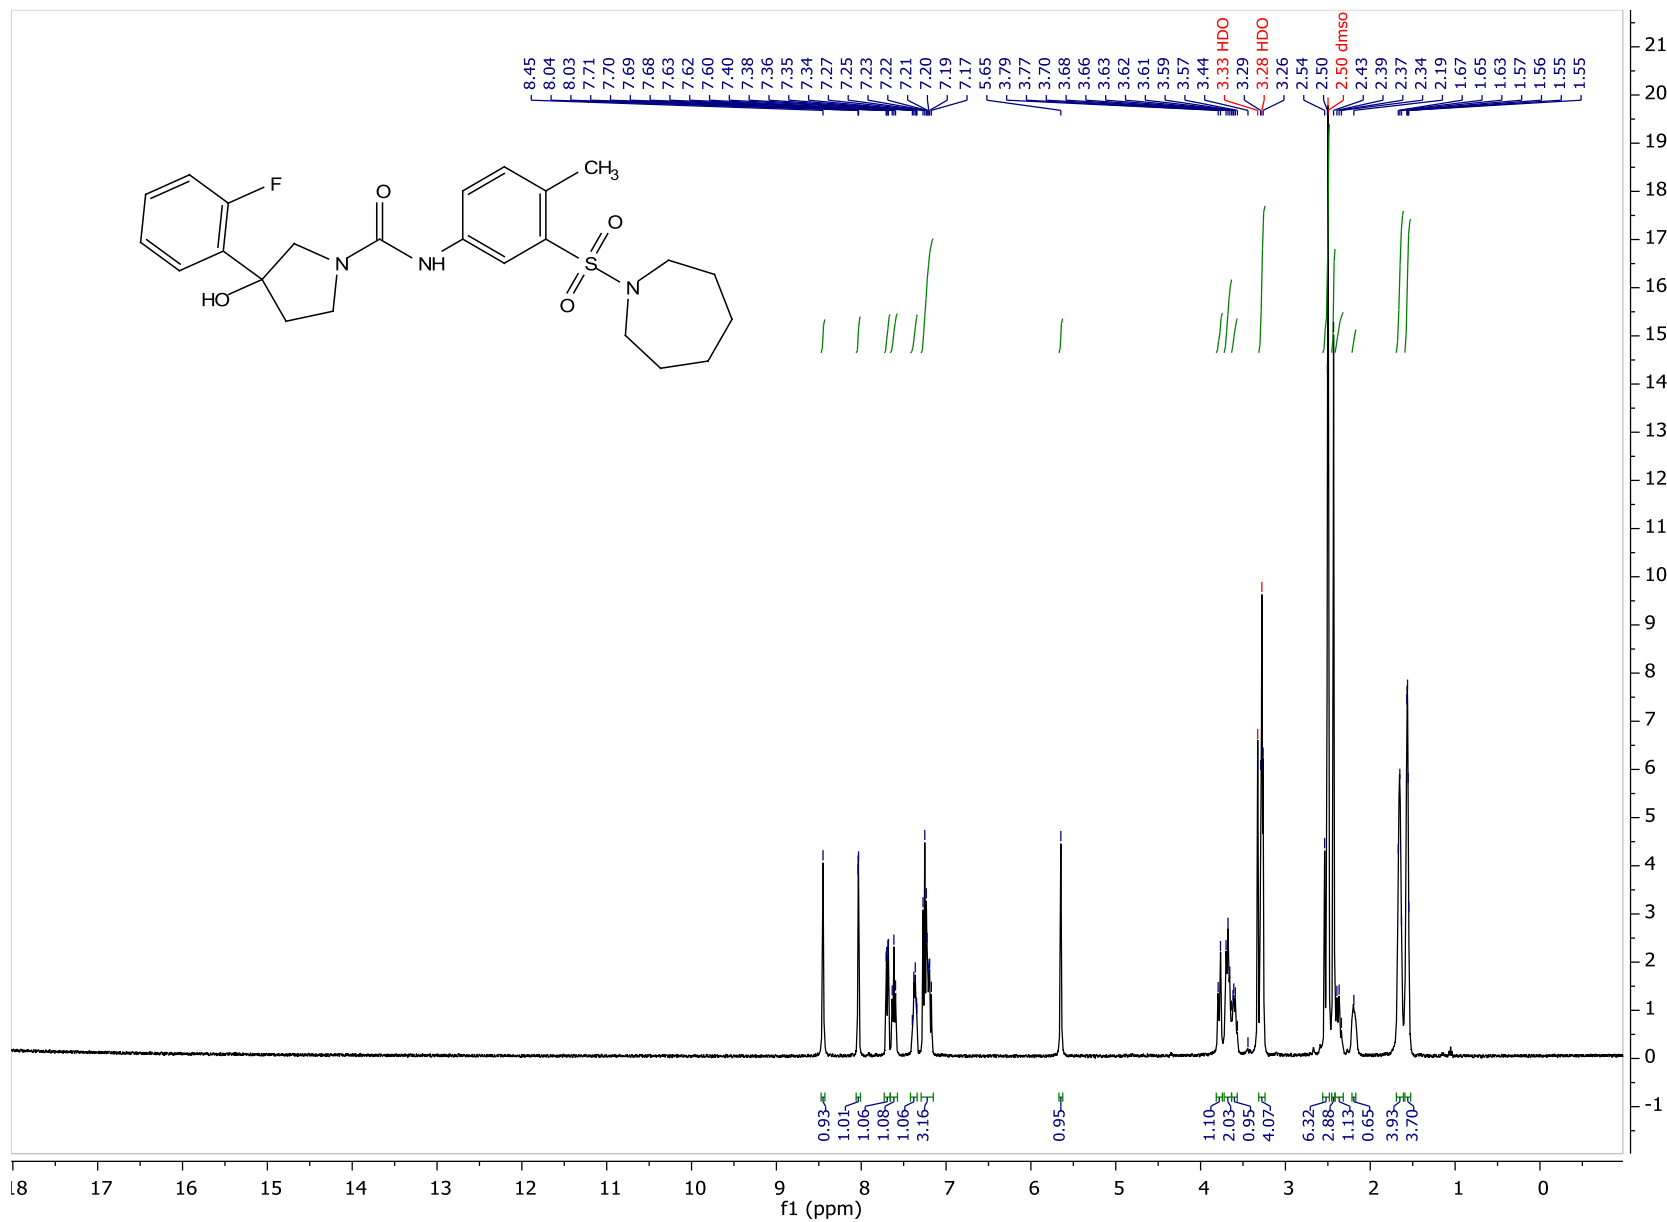

<sup>13</sup>C NMR spectrum of Z4121492409

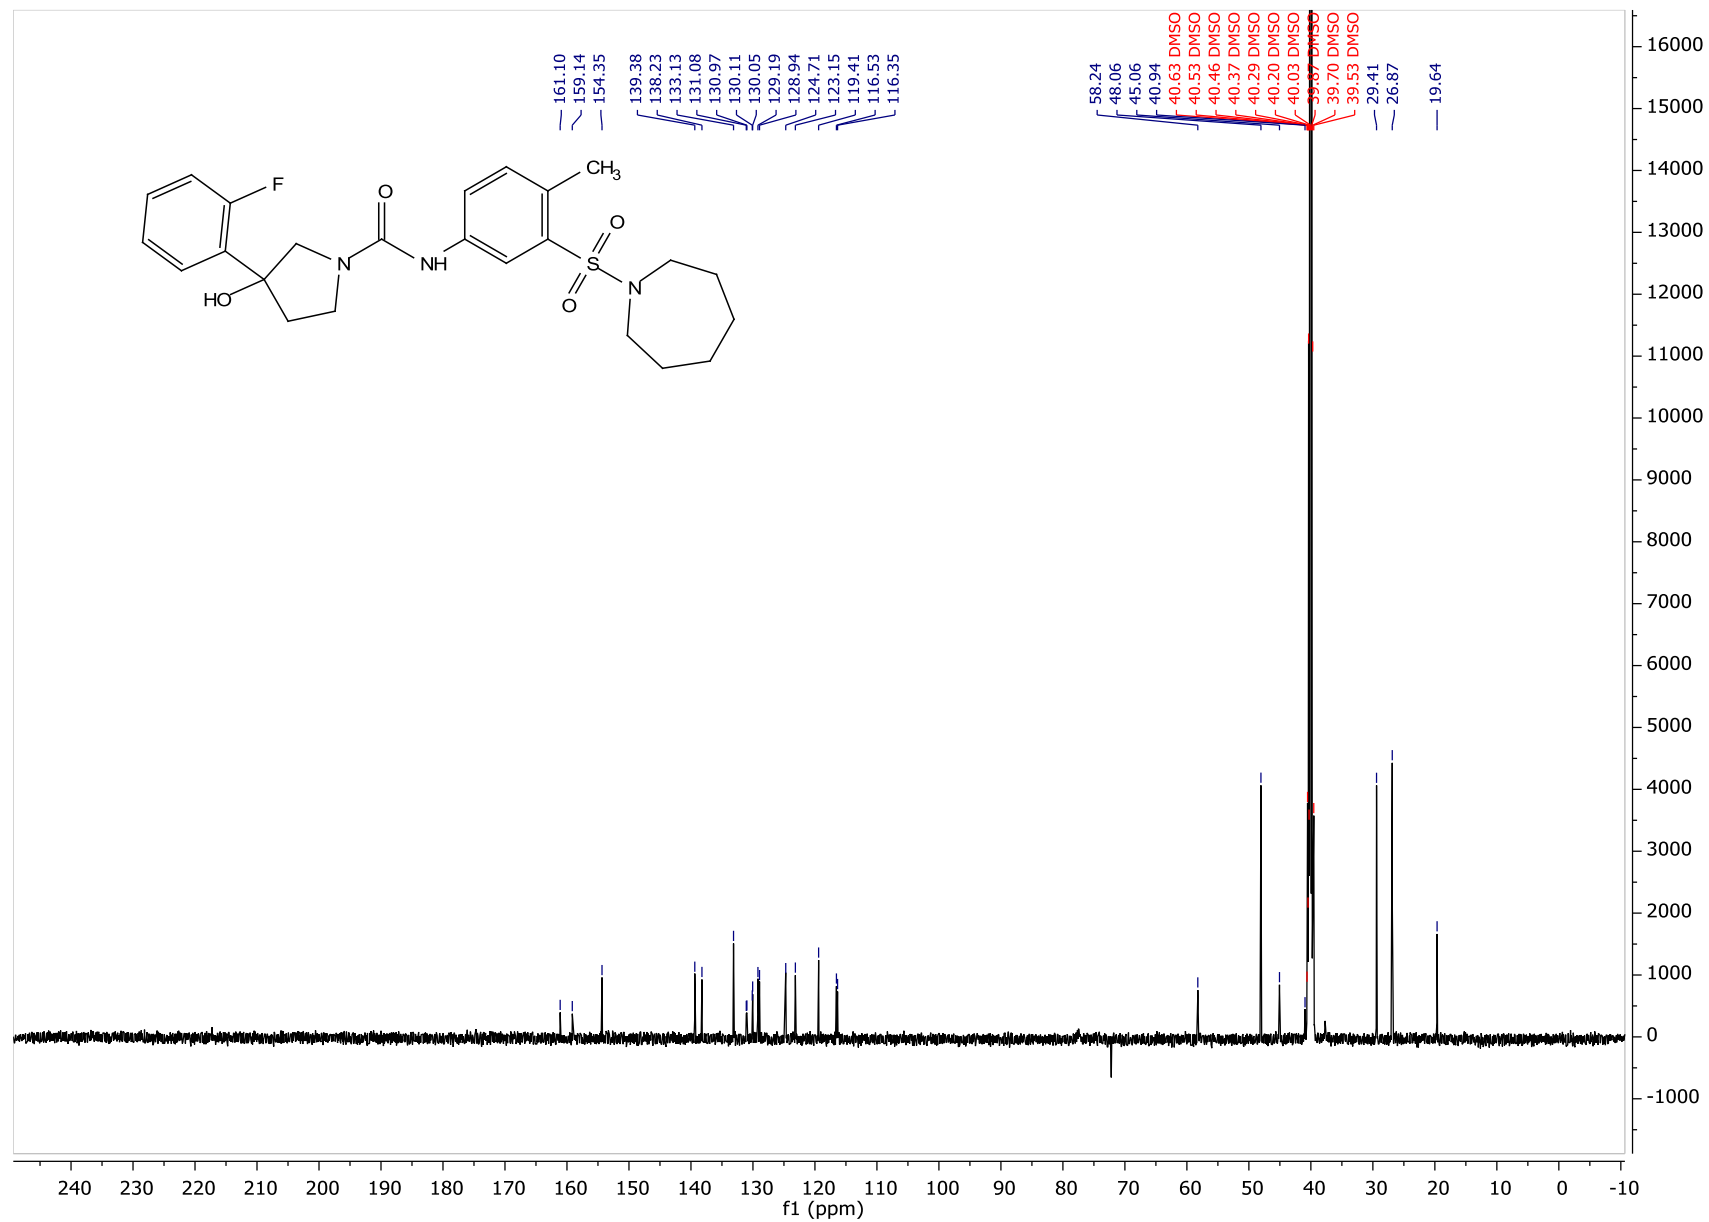

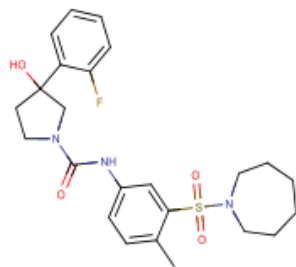

Mol Wt 475.58

Exact Mass 475.23

| # | Time  | Area%  |
|---|-------|--------|
| 1 | 1.275 | 100.00 |

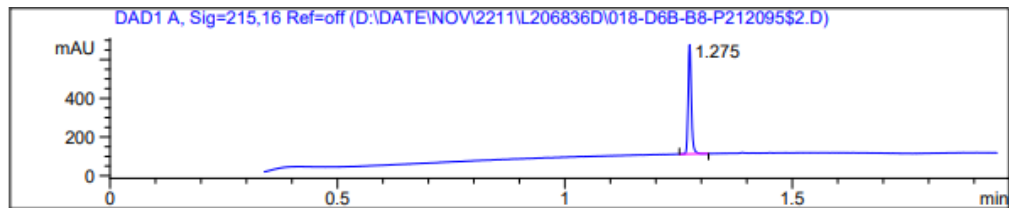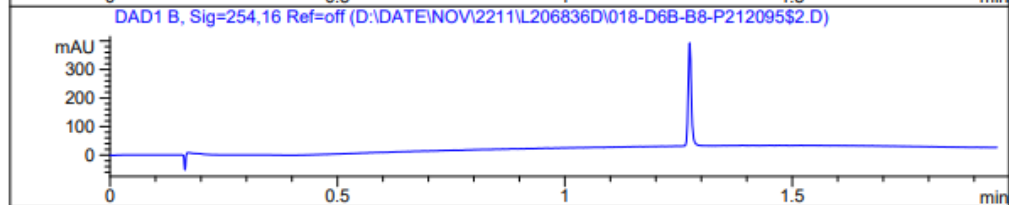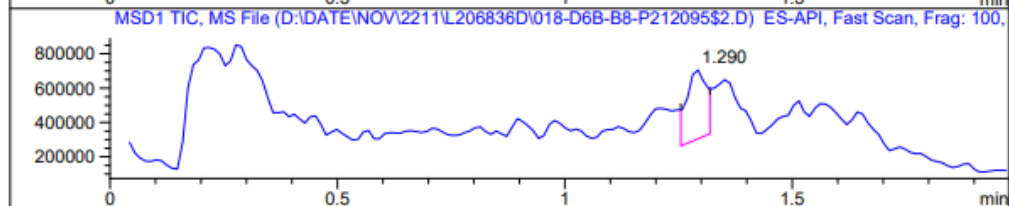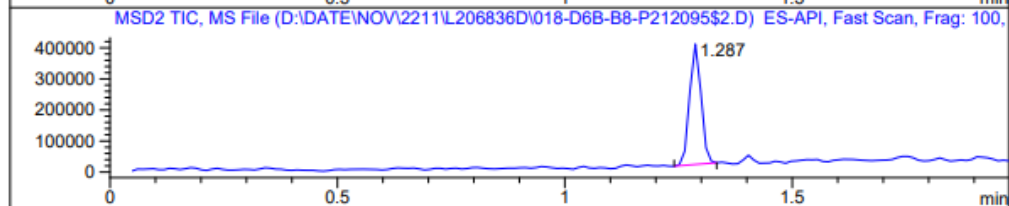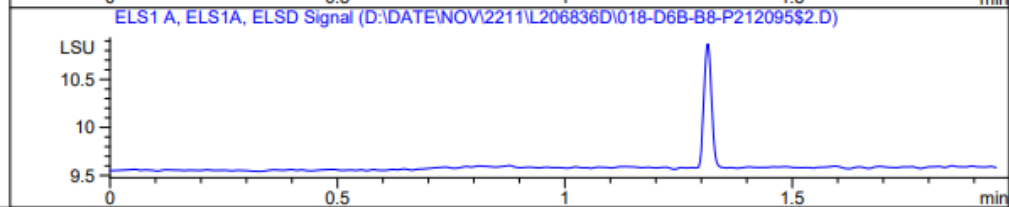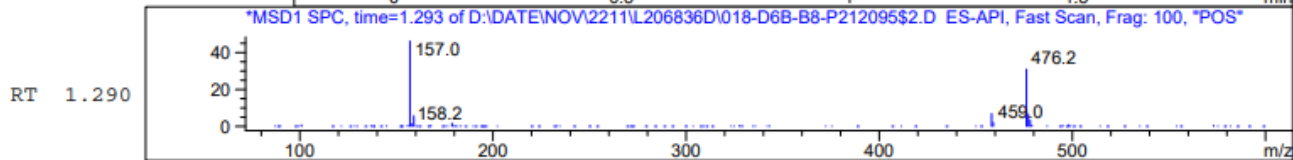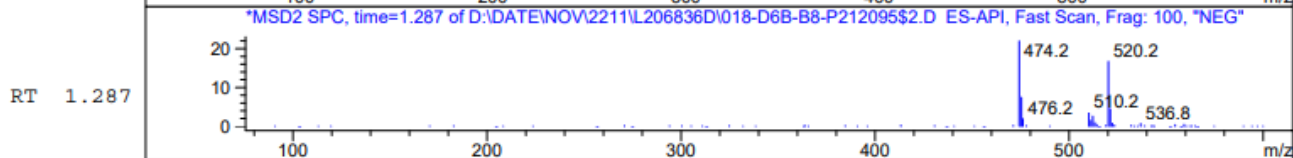

<sup>1</sup>H NMR spectrum of Z4121492610

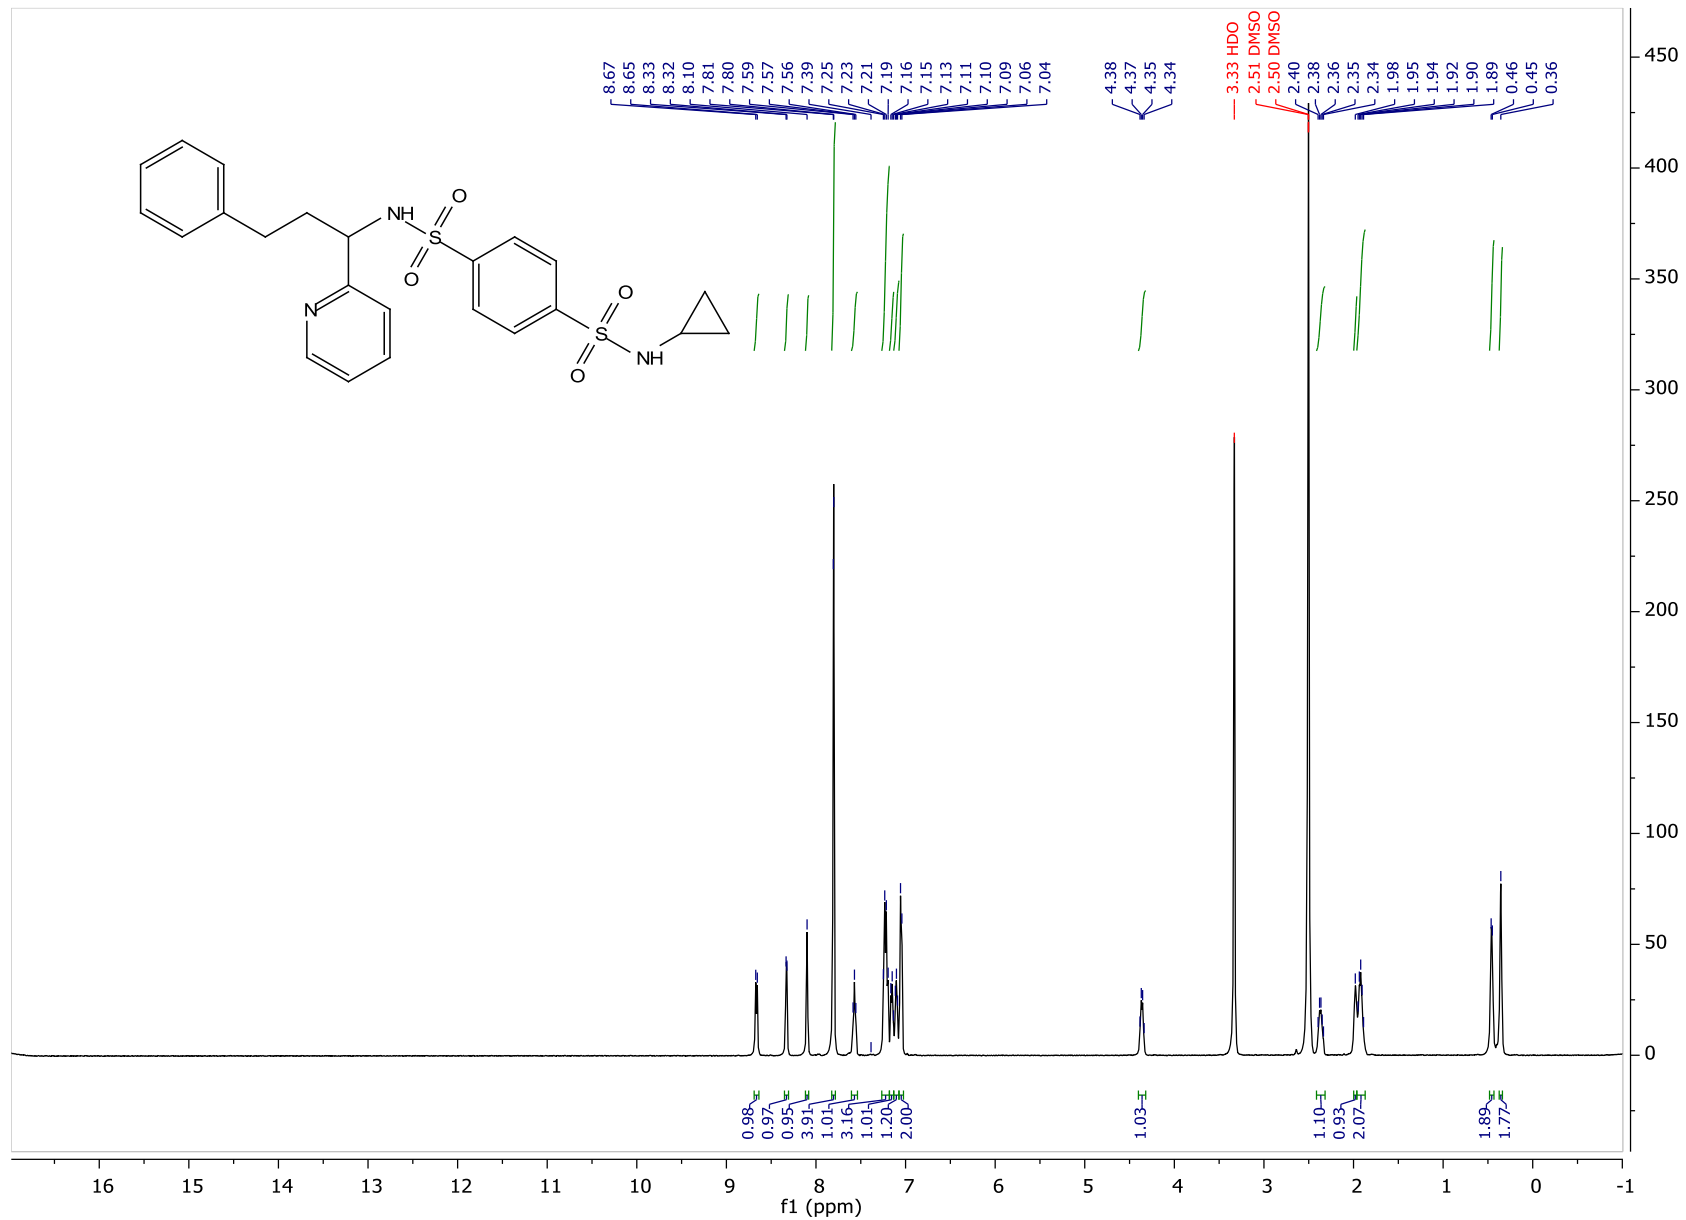

<sup>13</sup>C NMR spectrum of Z4121492610

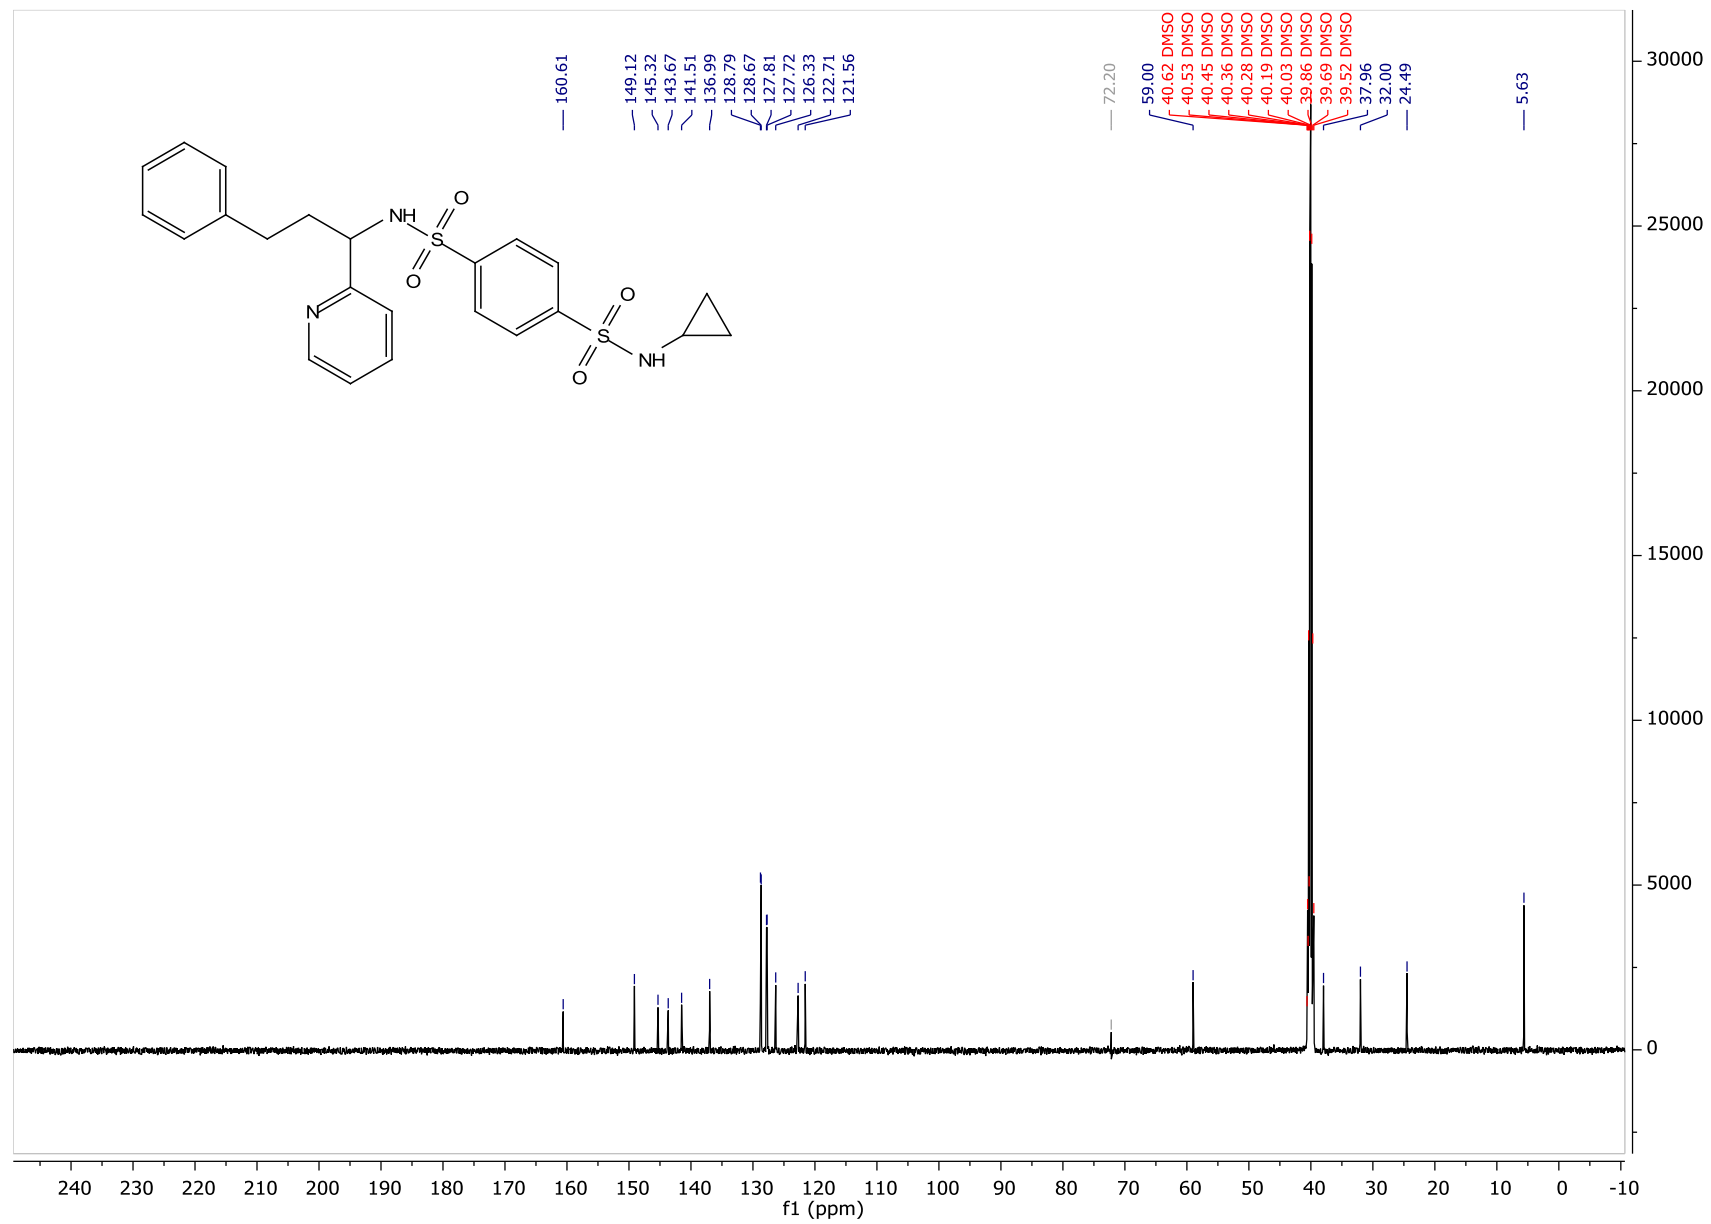

Ret\_Time: 1.223 min

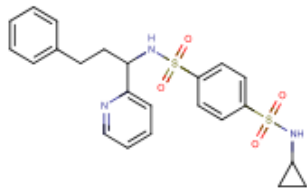

**Mol Wt** 471.59  
**Exact Mass** 471.15

| # | Time  | Area%  |
|---|-------|--------|
| 1 | 1.223 | 100.00 |

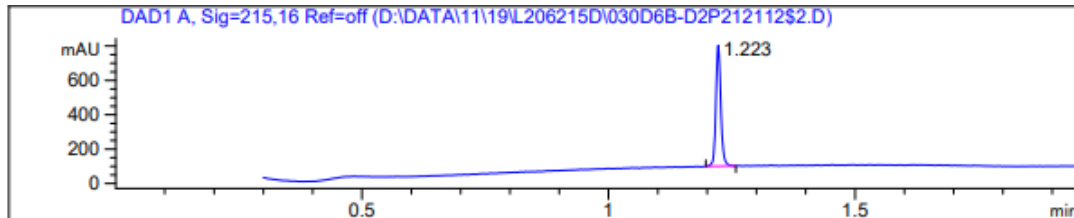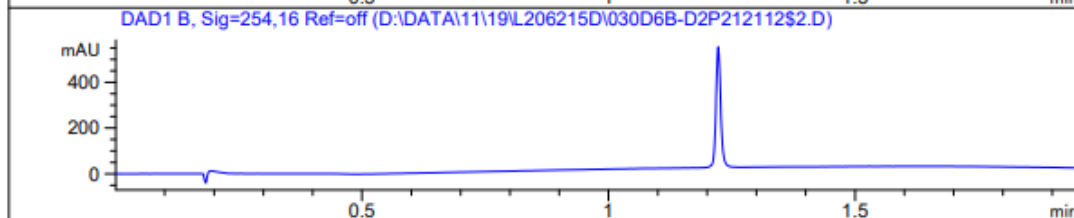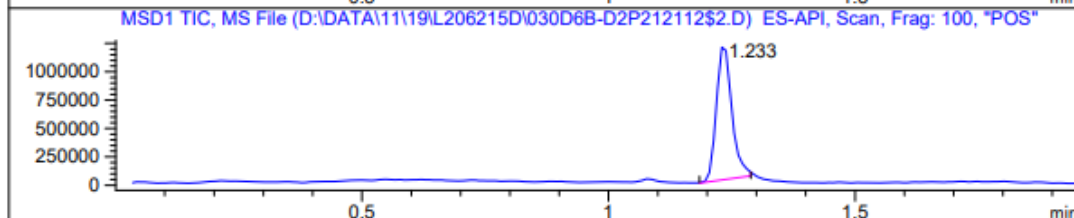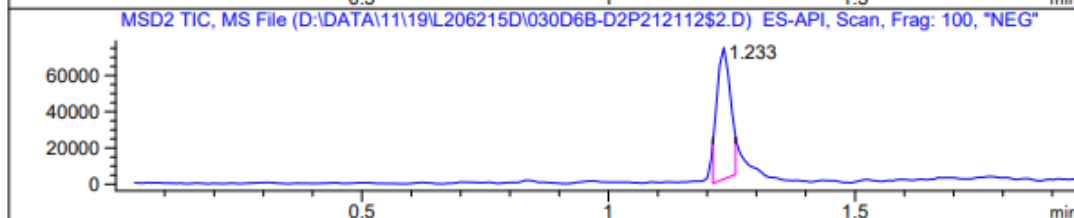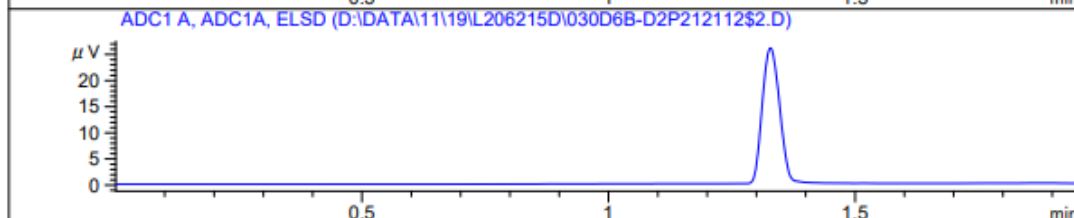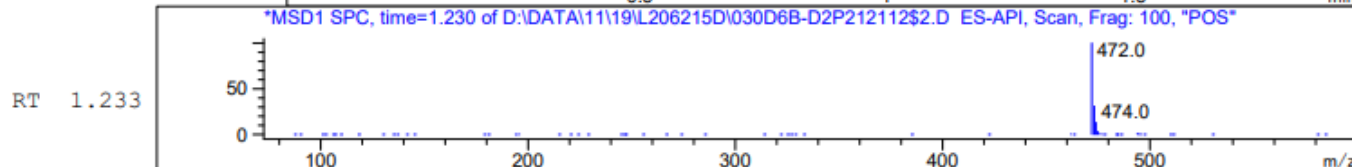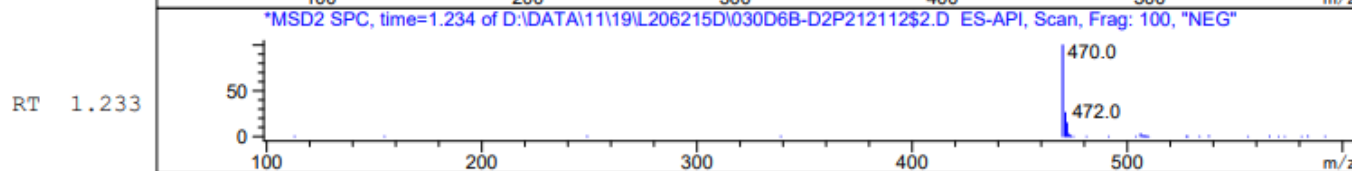

<sup>1</sup>H NMR spectrum of Z4121492611

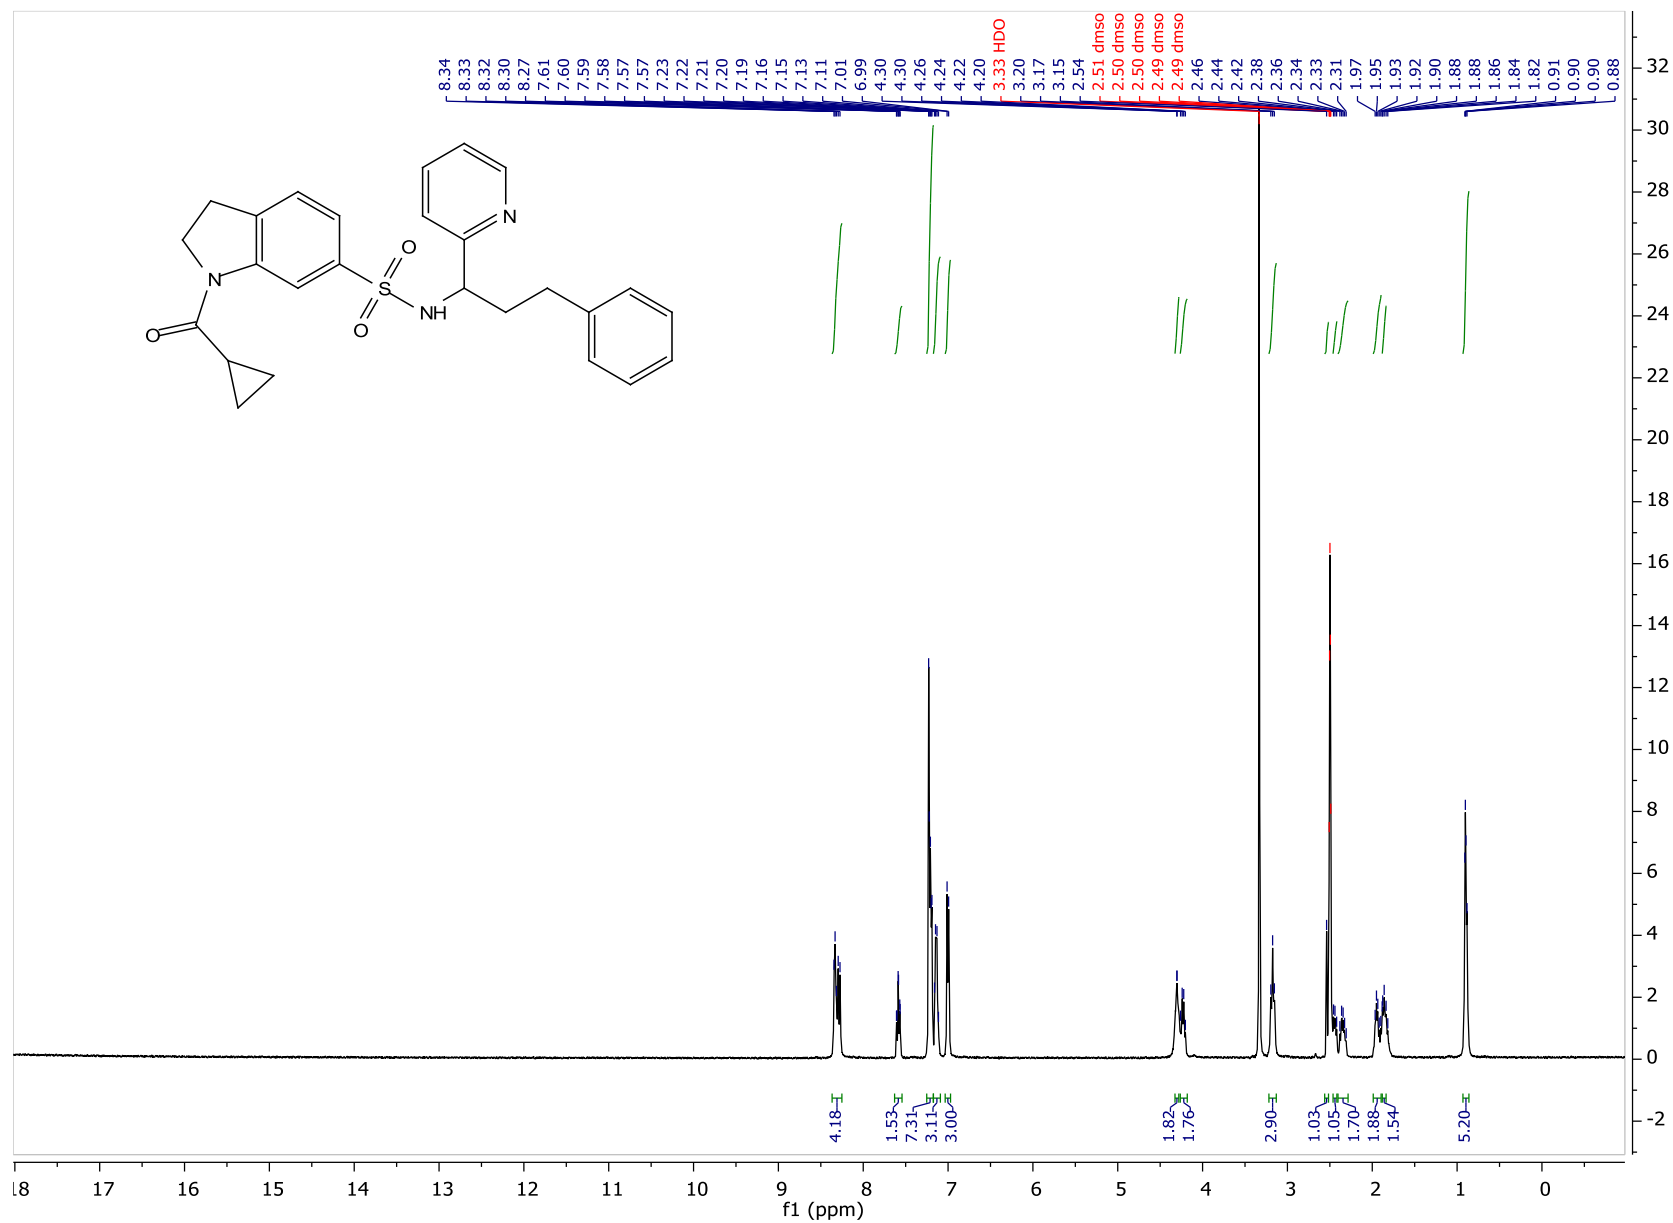



<sup>13</sup>C NMR spectrum of Z4121492611

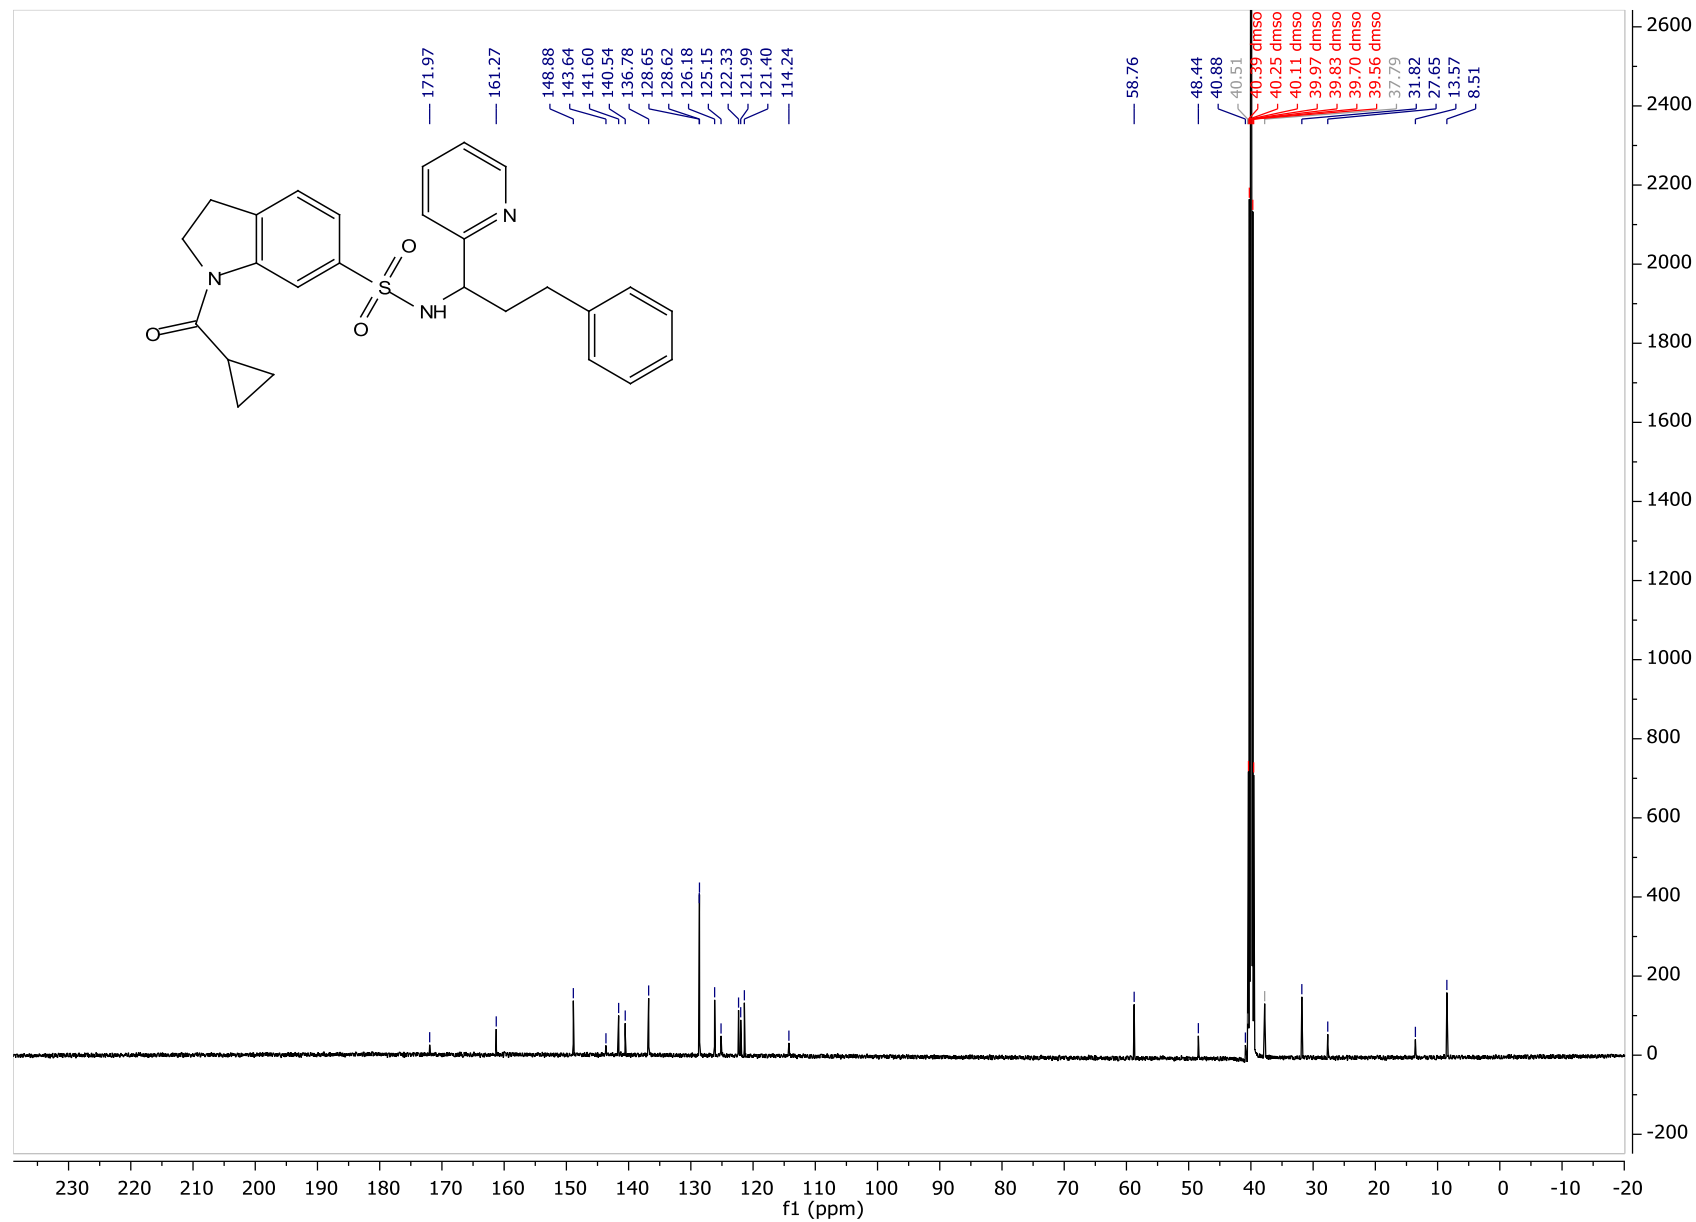

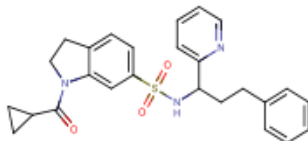

**Mol Wt** 461.58

**Exact Mass** 461.21

| # | Time  | Area%  |
|---|-------|--------|
| 1 | 1.381 | 100.00 |

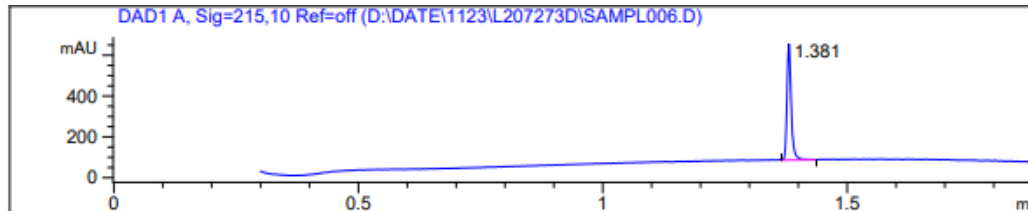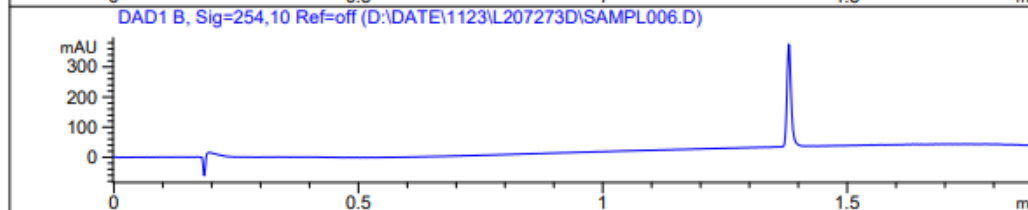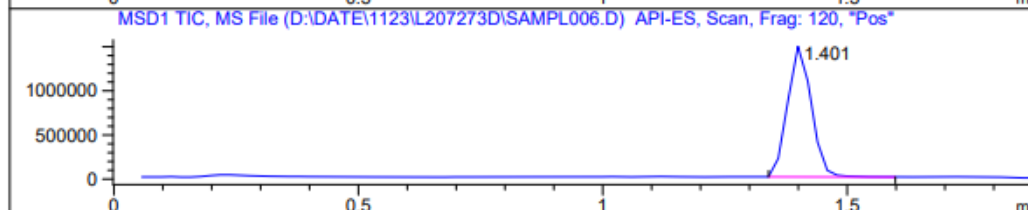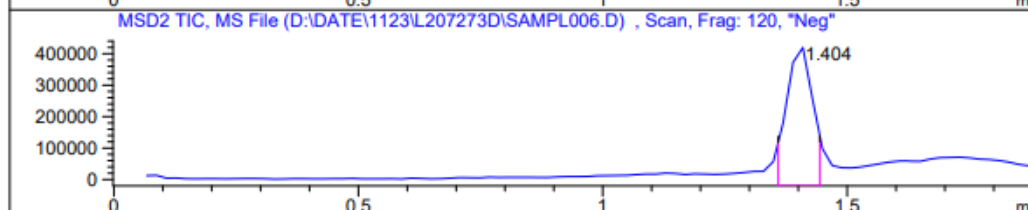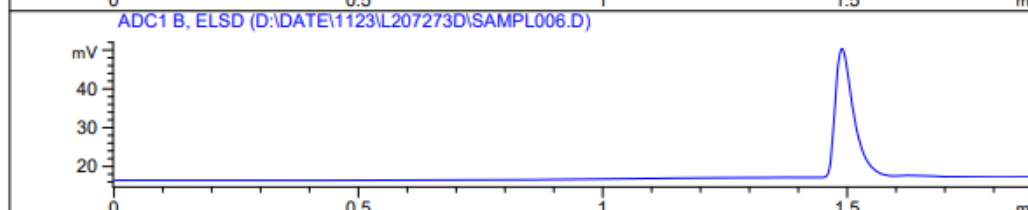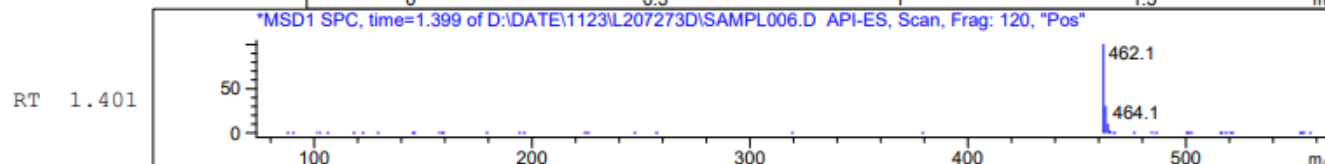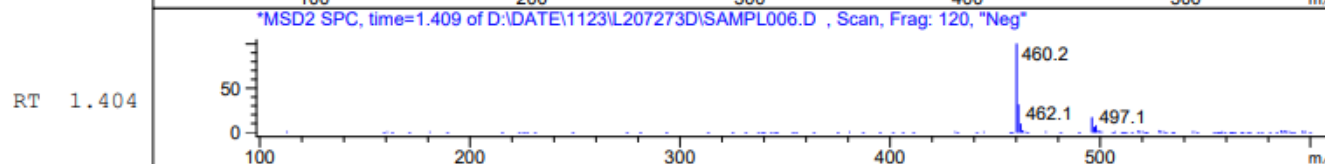

<sup>1</sup>H NMR spectrum of Z4121492674

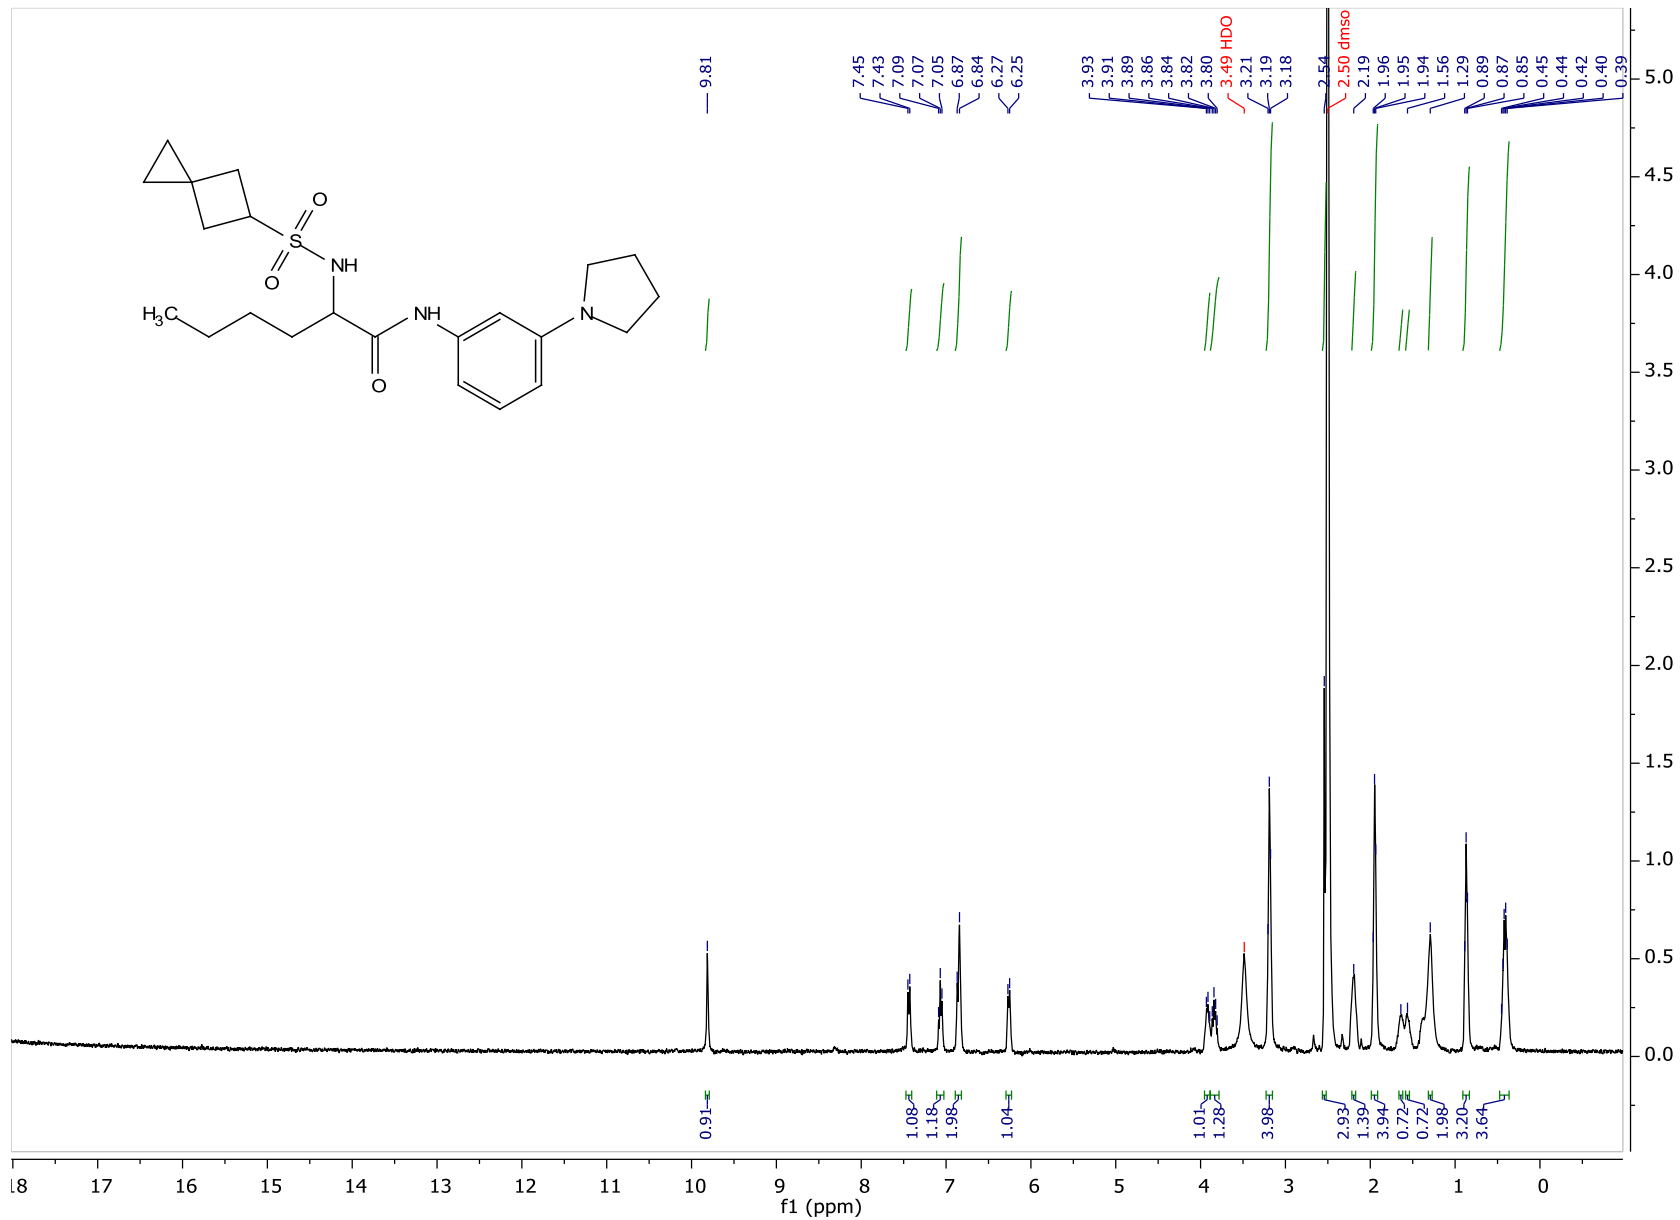

<sup>13</sup>C NMR spectrum of Z4121492674

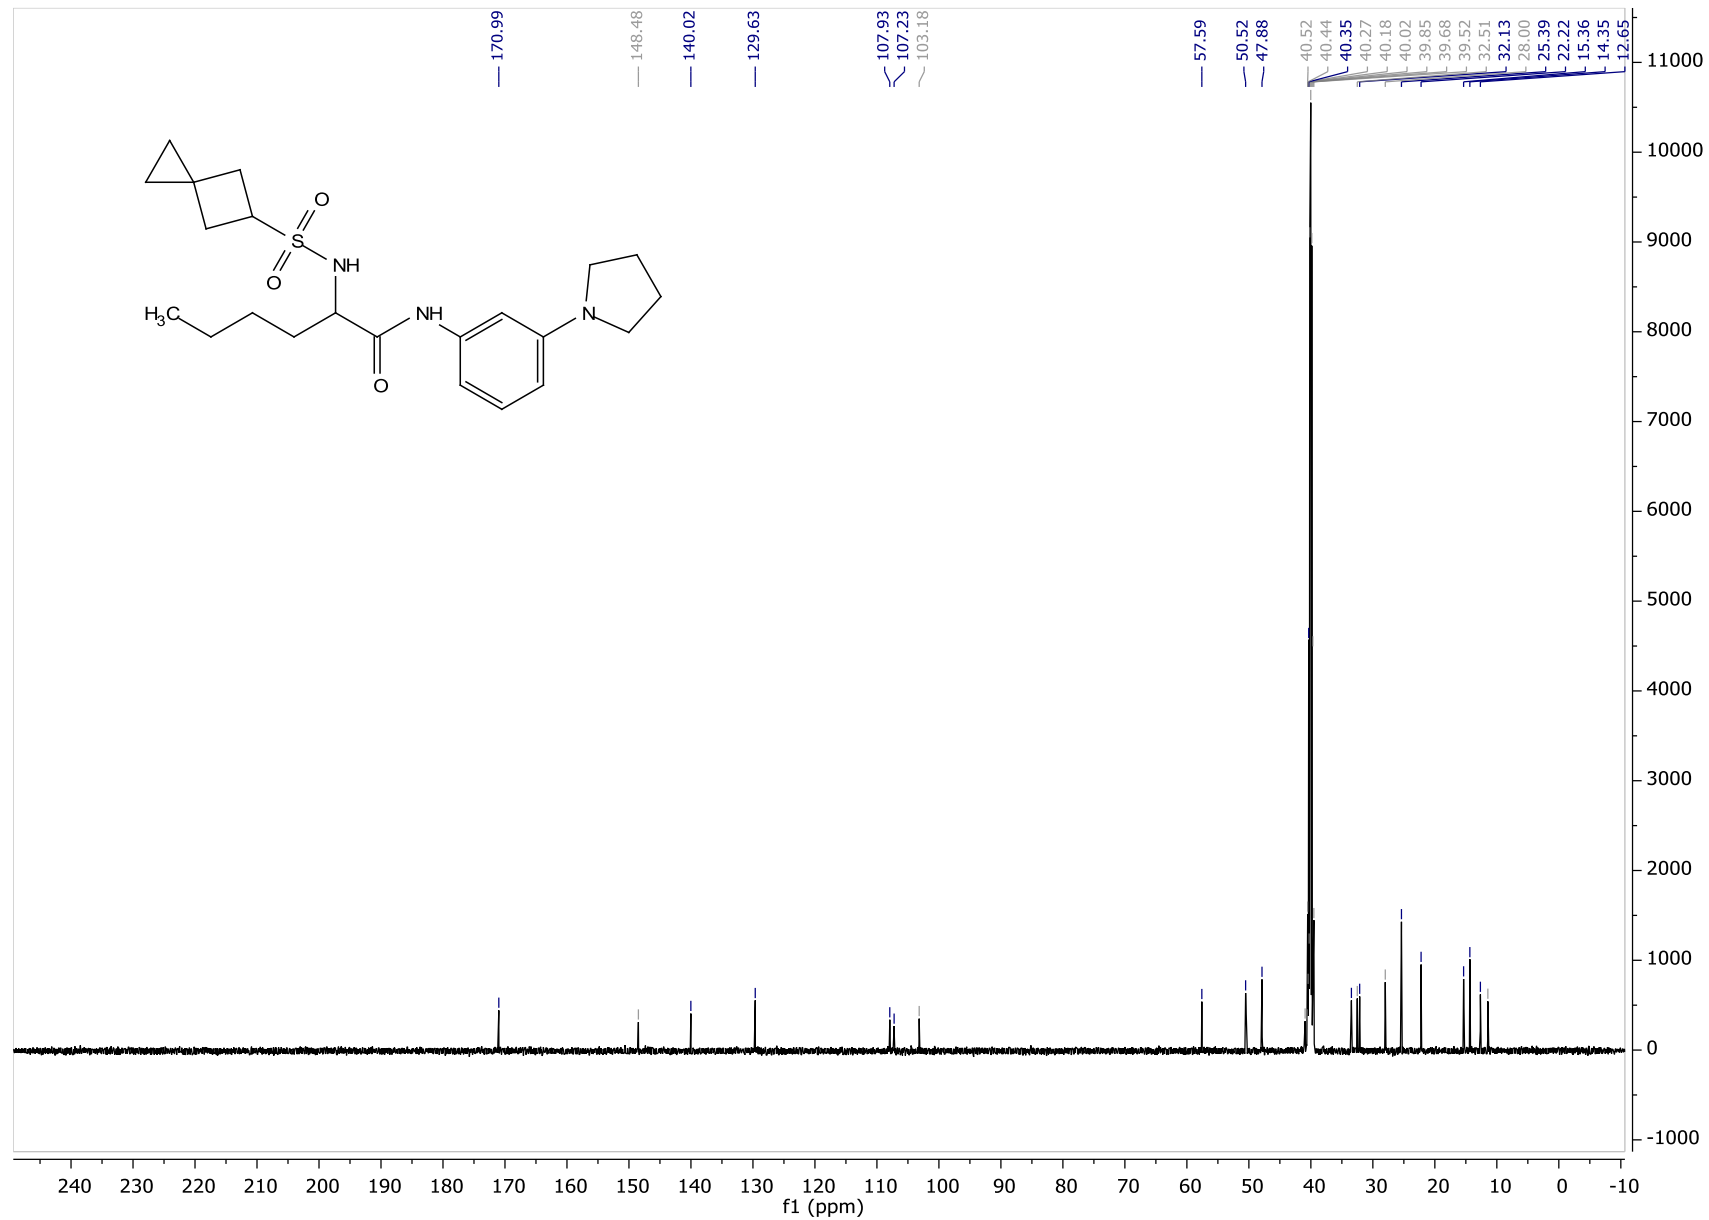

LC/MS spectrum of Z4121492674

Ret\_Time: 1.538 min

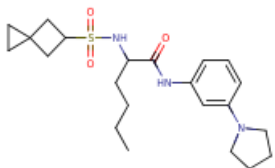

**Mol Wt** 419.58  
**Exact Mass** 419.27

| # | Time  | Area% |
|---|-------|-------|
| 1 | 1.420 | 2.57  |
| 2 | 1.496 | 1.65  |
| 3 | 1.538 | 95.78 |

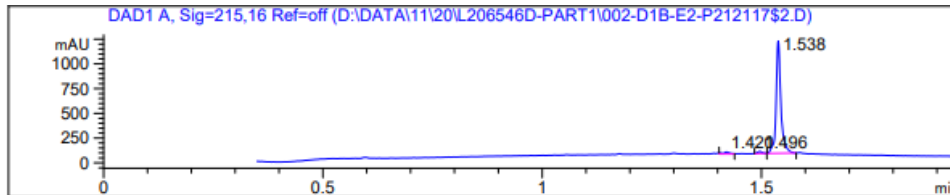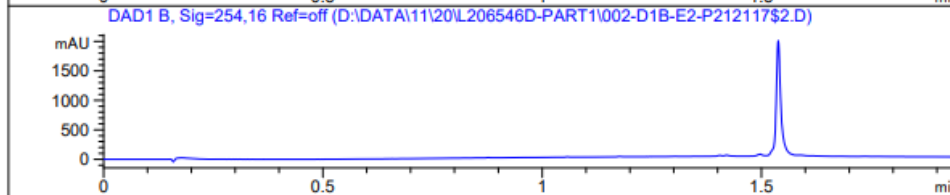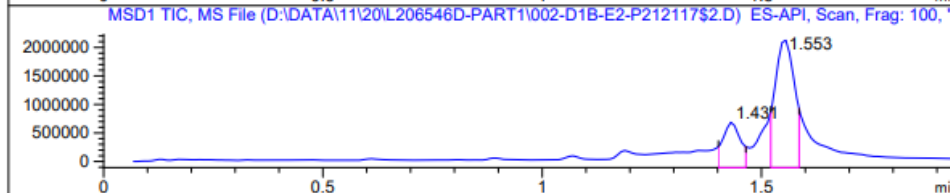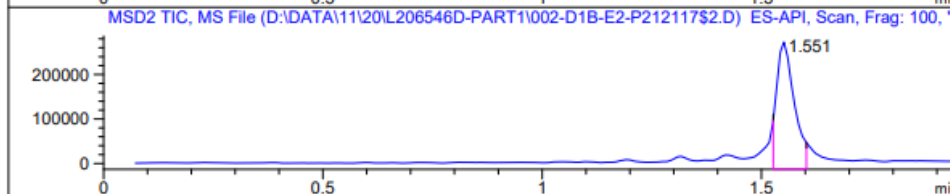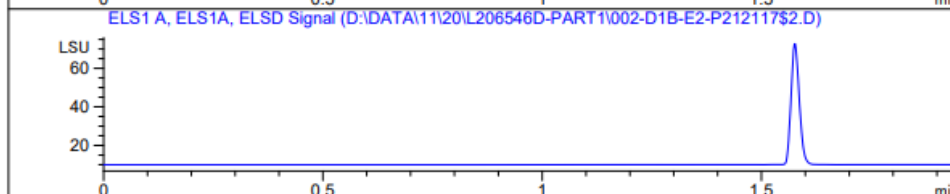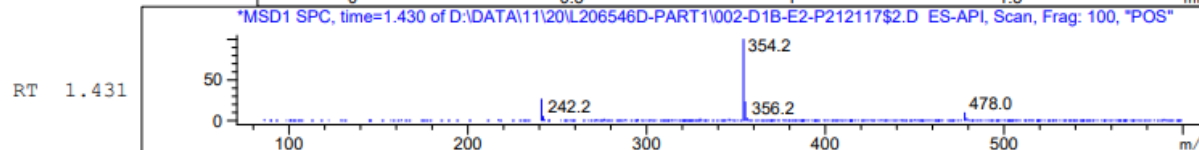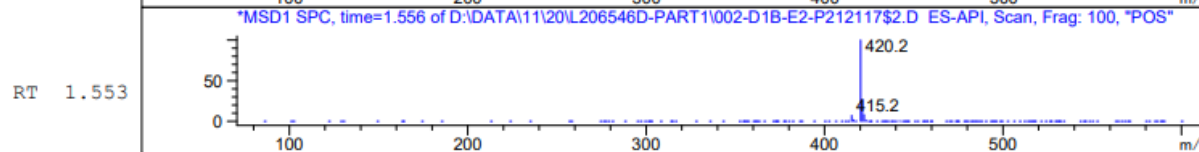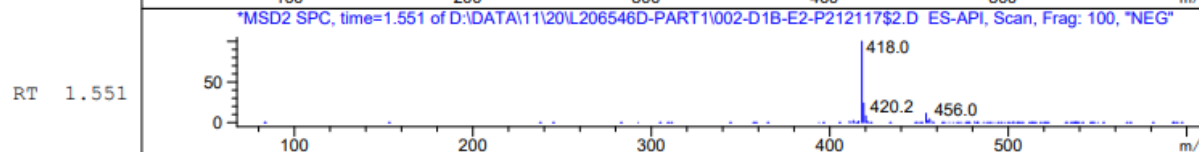

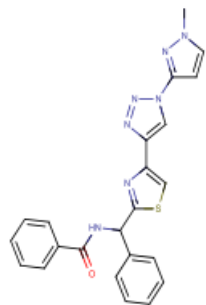

Mol Wt 441.51  
Exact Mass 441.15

| # | Time  | Area% |
|---|-------|-------|
| 1 | 1.316 | 1.84  |
| 2 | 1.371 | 93.75 |
| 3 | 1.460 | 4.41  |

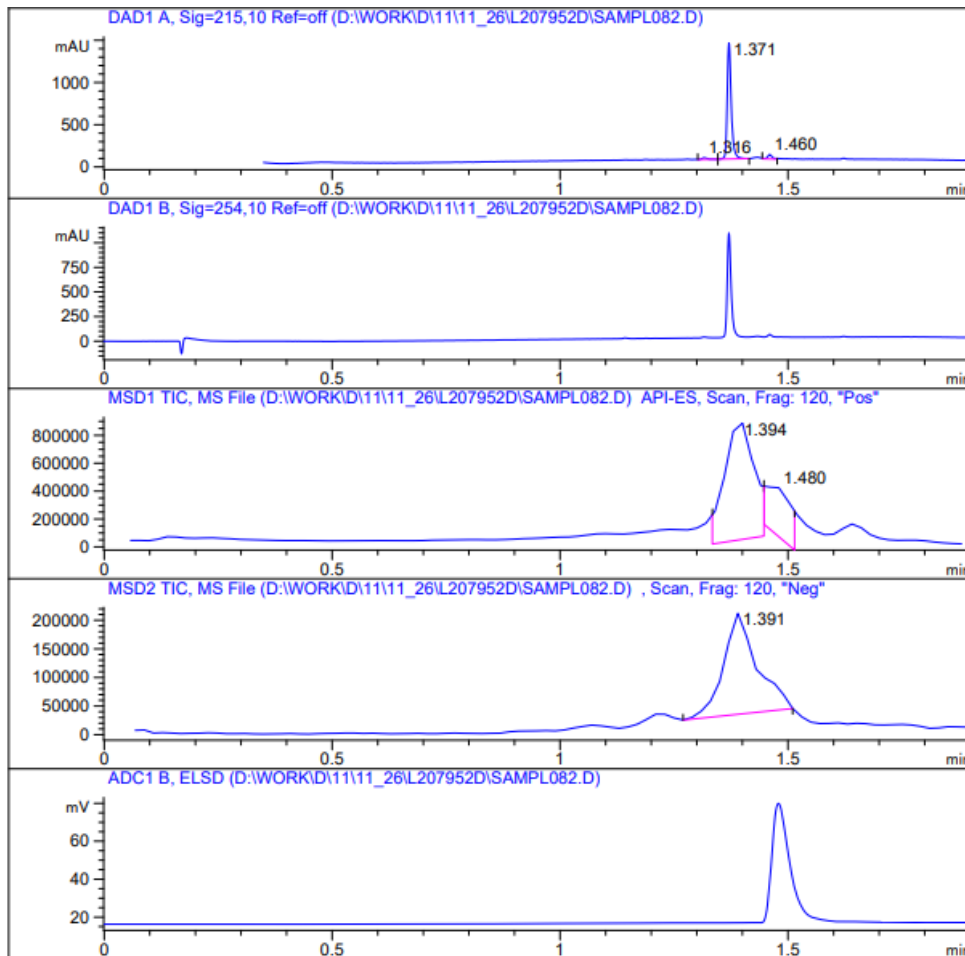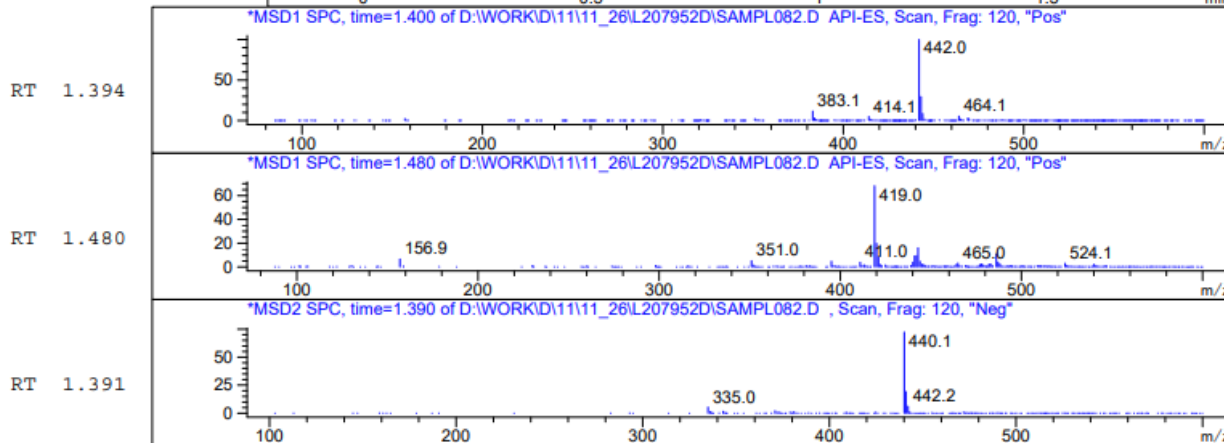

<sup>1</sup>H NMR spectrum of Z4425934104

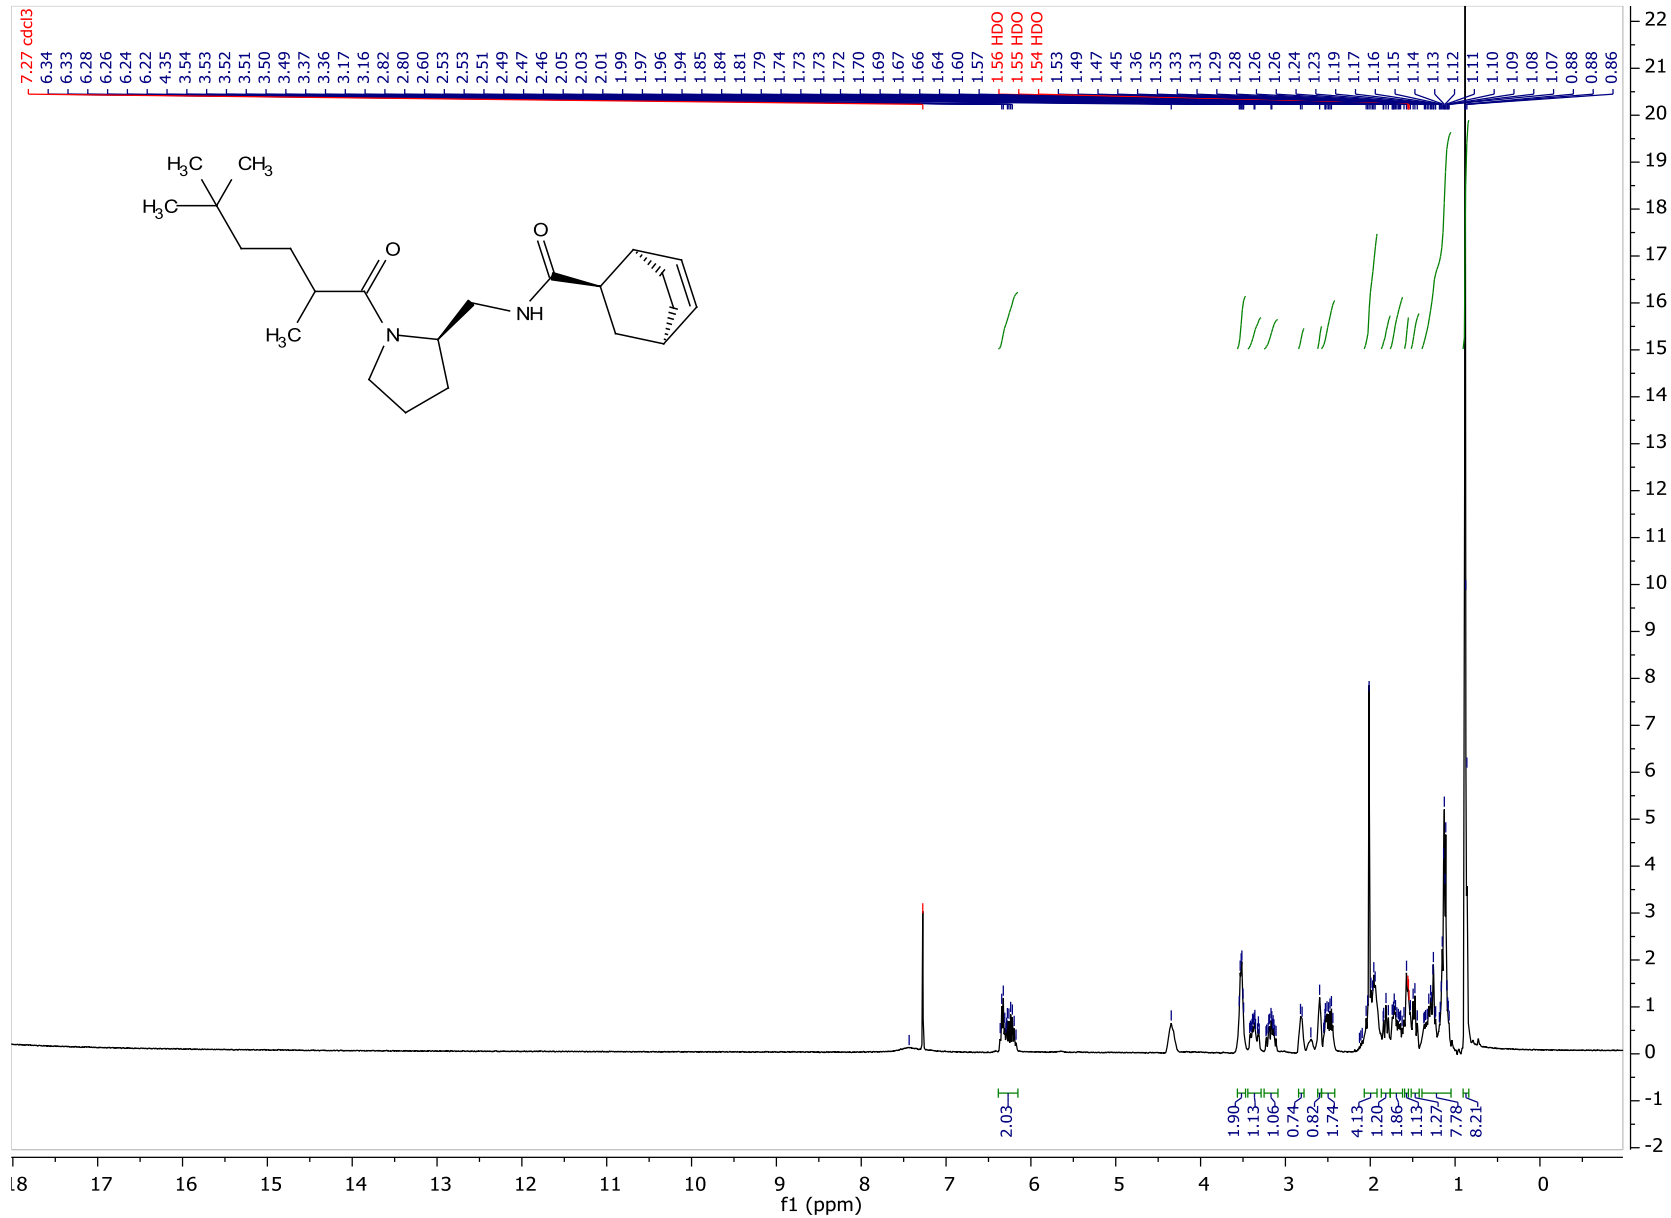

<sup>13</sup>C NMR spectrum of Z4425934104

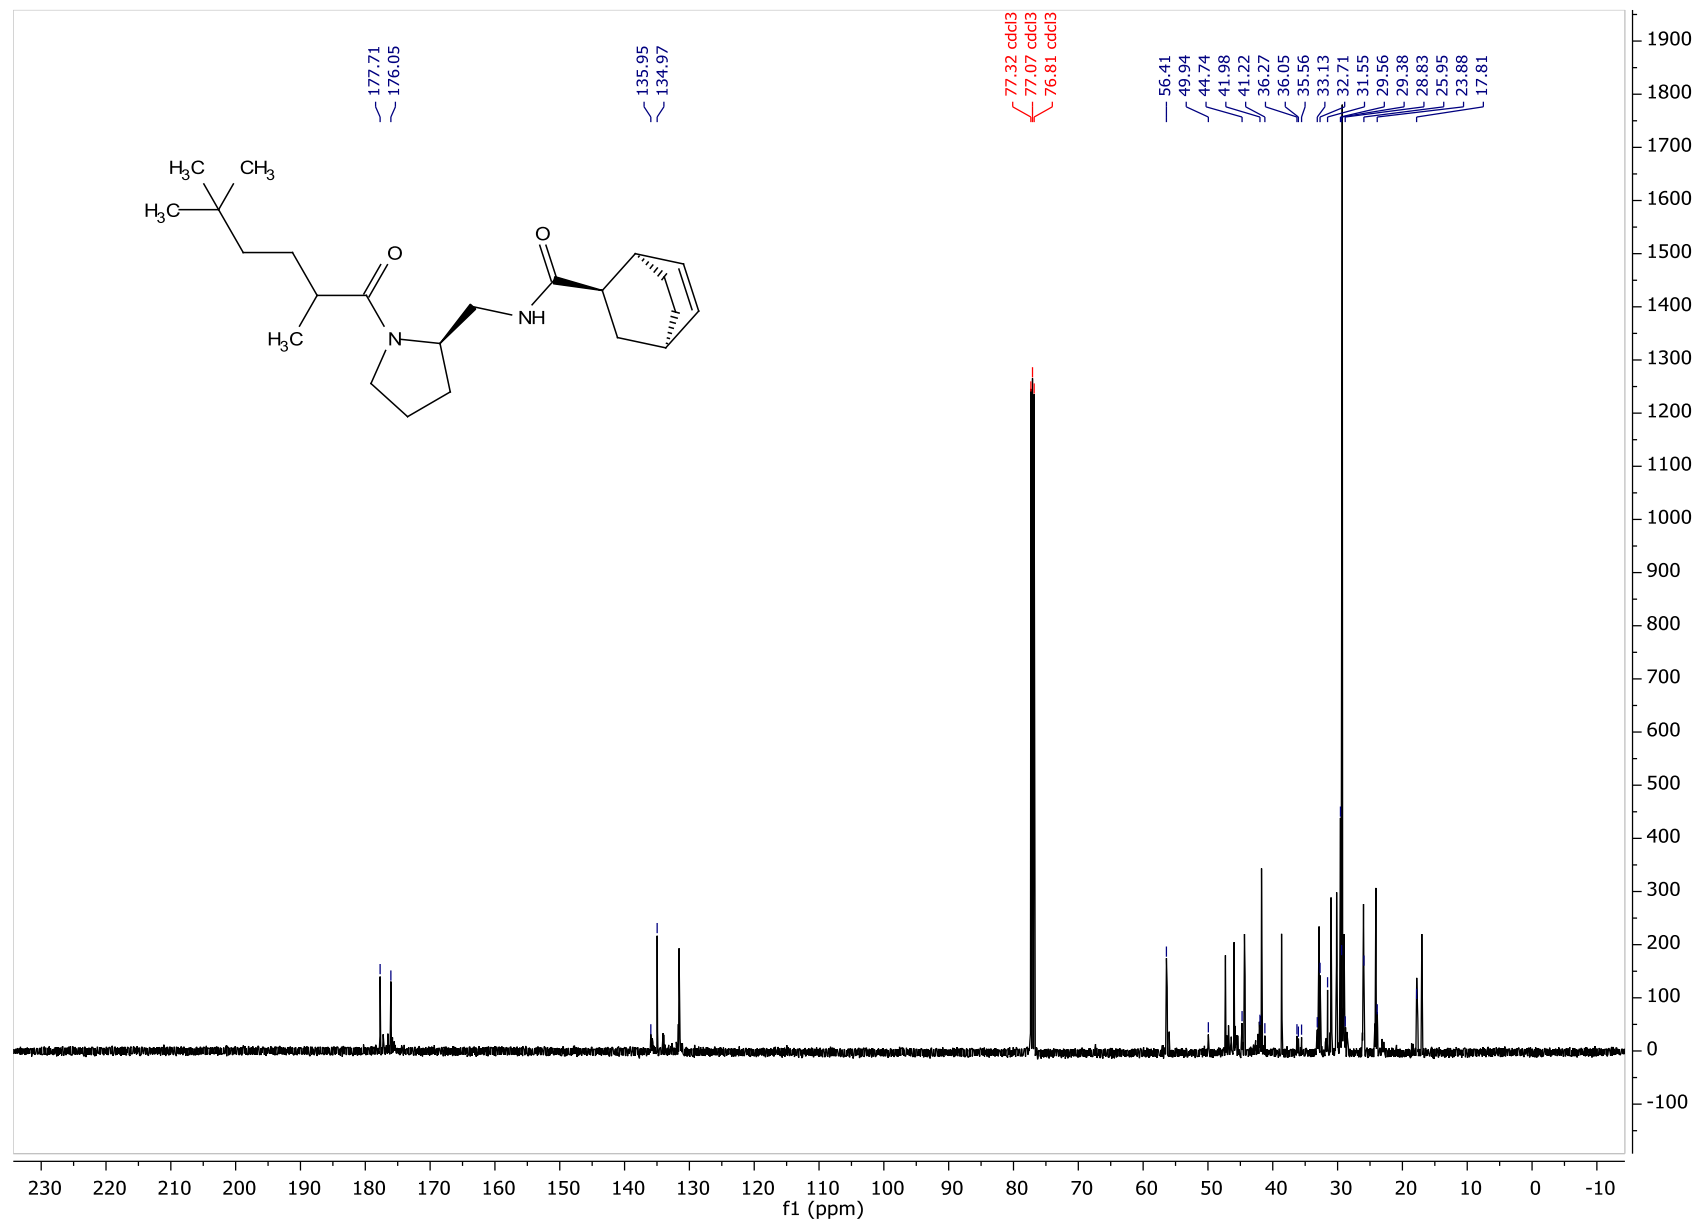



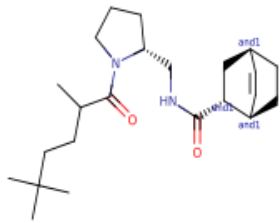

Mol Wt 374.56

Exact Mass 374.36

| # | Time  | Area%  |
|---|-------|--------|
| 1 | 1.521 | 100.00 |

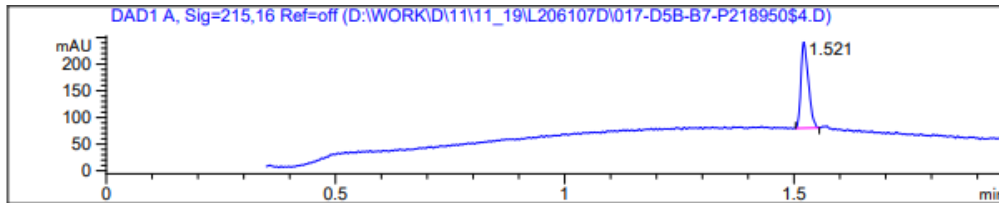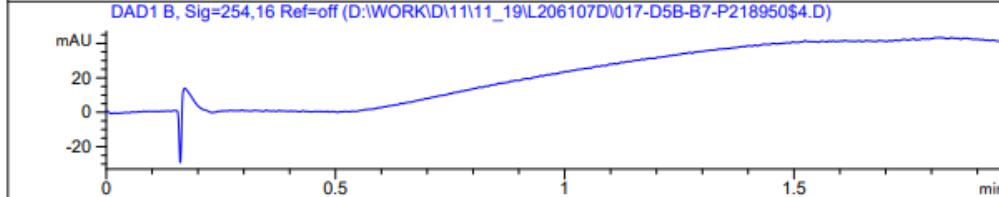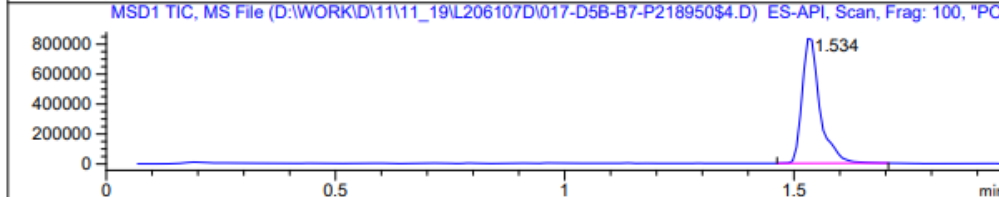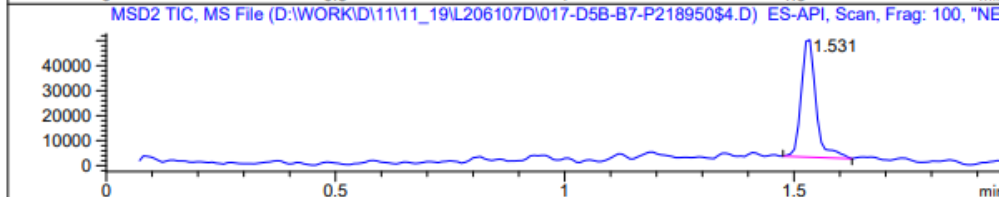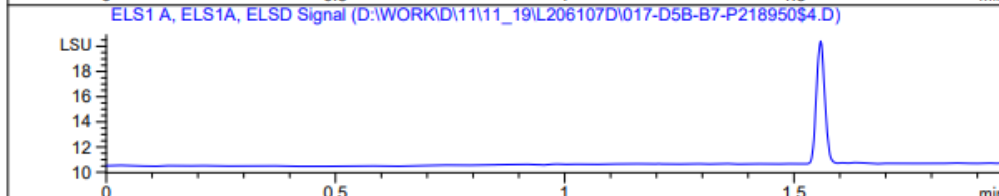

RT 1.534

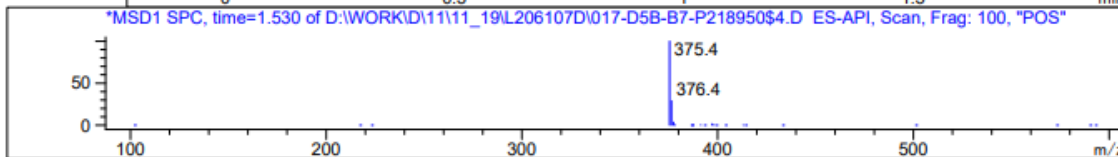

RT 1.531

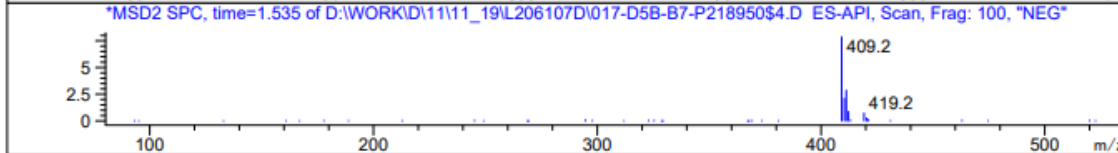

<sup>1</sup>H NMR spectrum of Z649786252

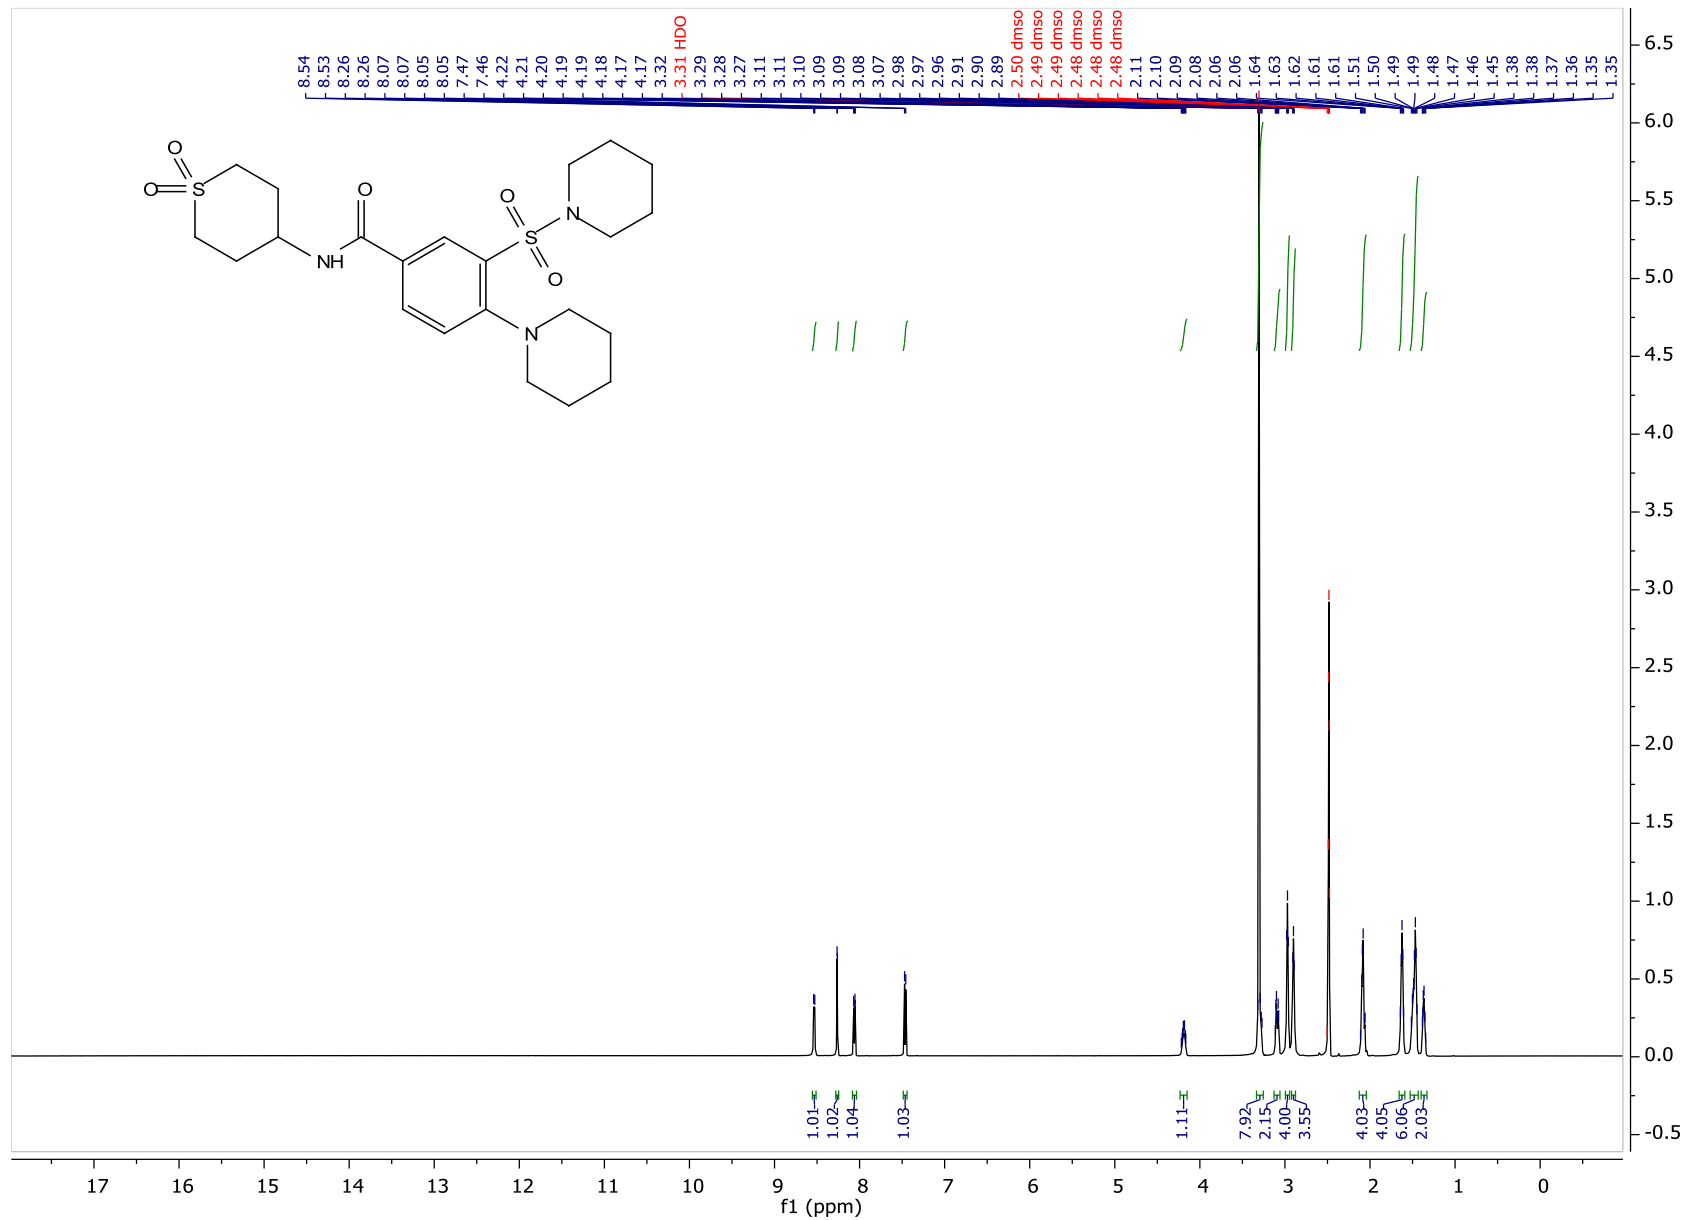

<sup>13</sup>C NMR spectrum of Z649786252

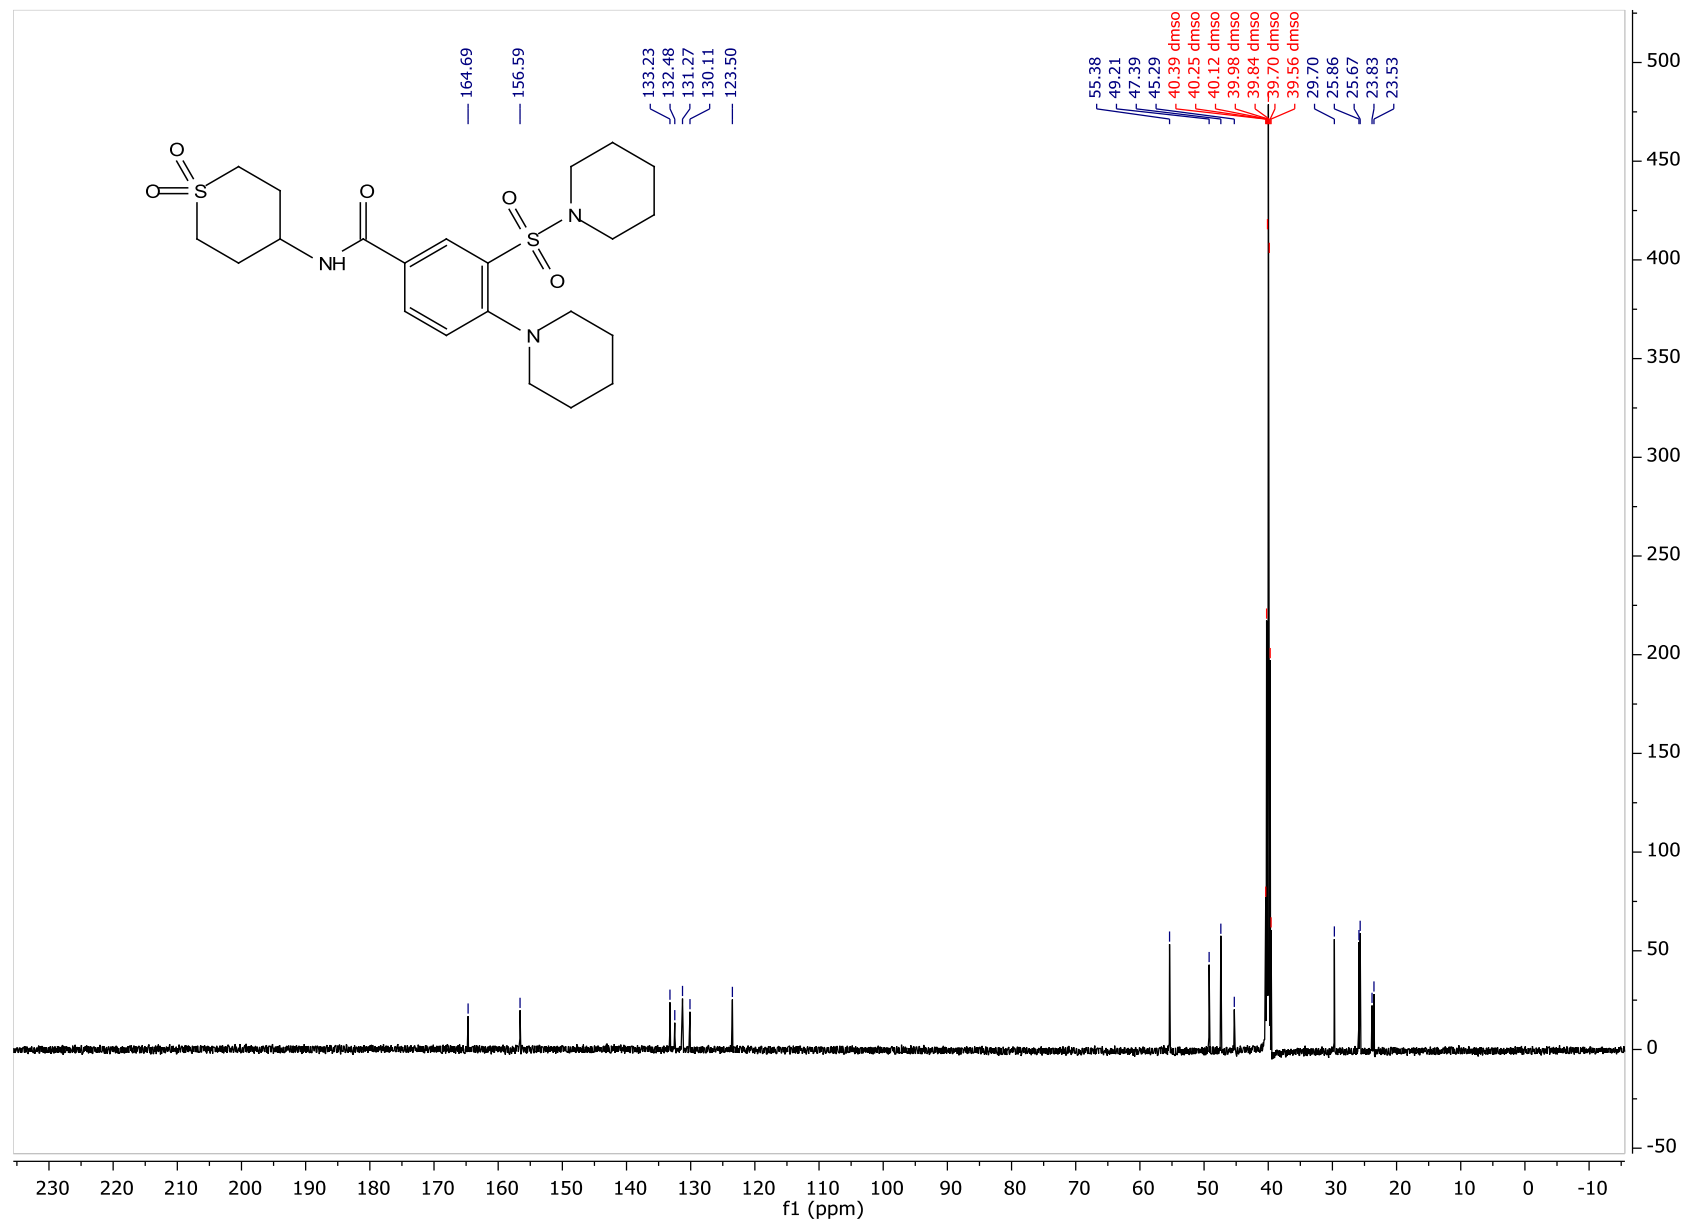

LC/MS spectrum of Z649786252

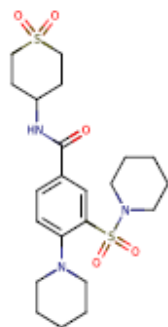

Mol Wt 483.64

Exact Mass 483.22

| # | Time  | Area%  |
|---|-------|--------|
| 1 | 1.239 | 100.00 |

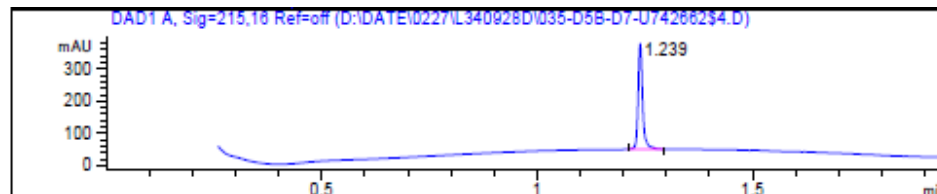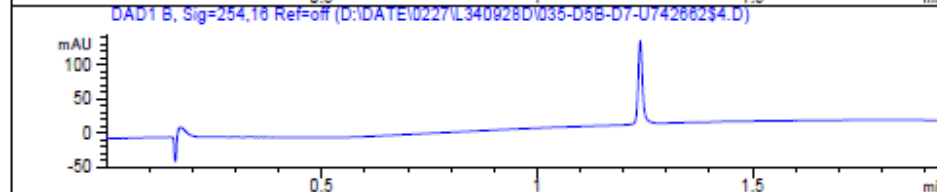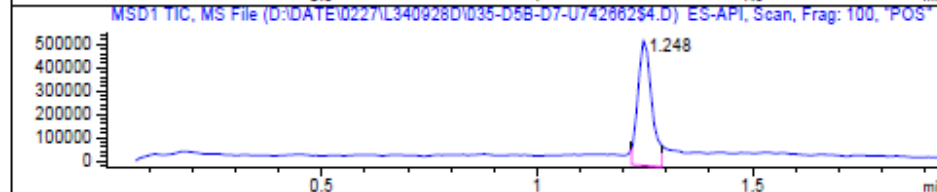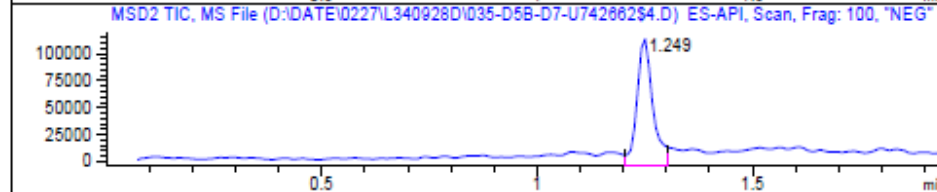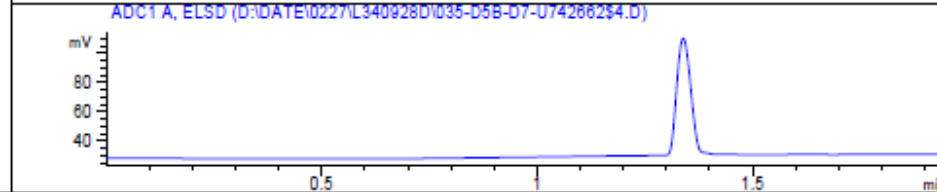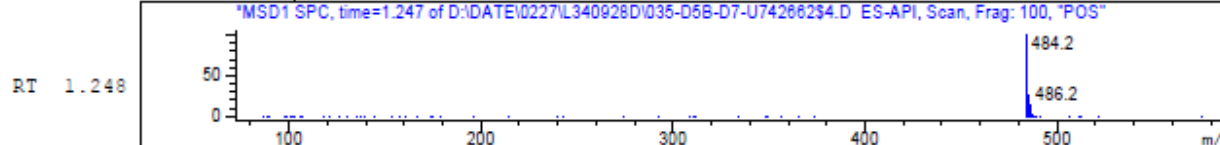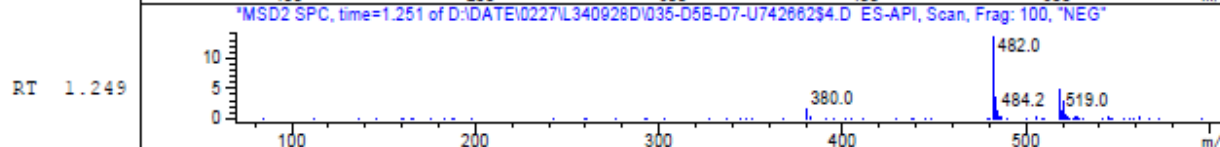

<sup>1</sup>H NMR spectrum of Z1289884410

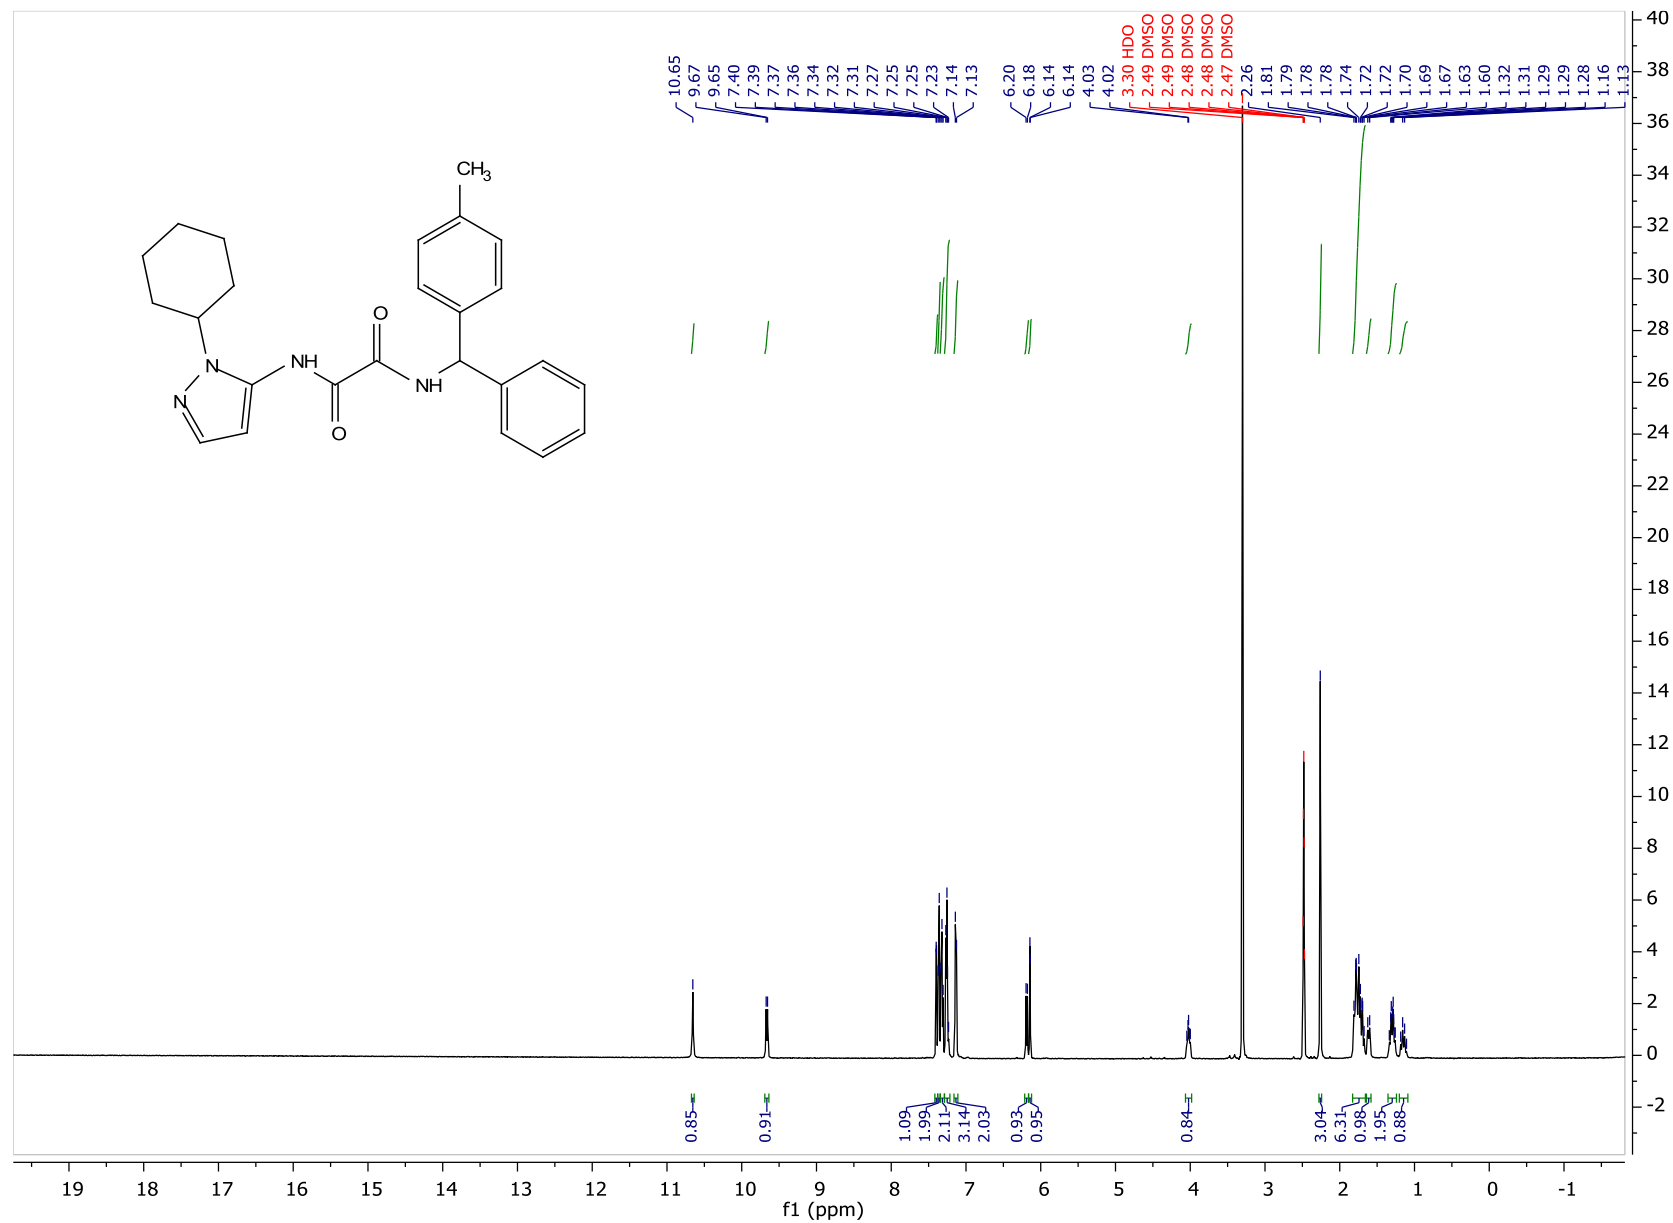

<sup>13</sup>C NMR spectrum of Z1289884410

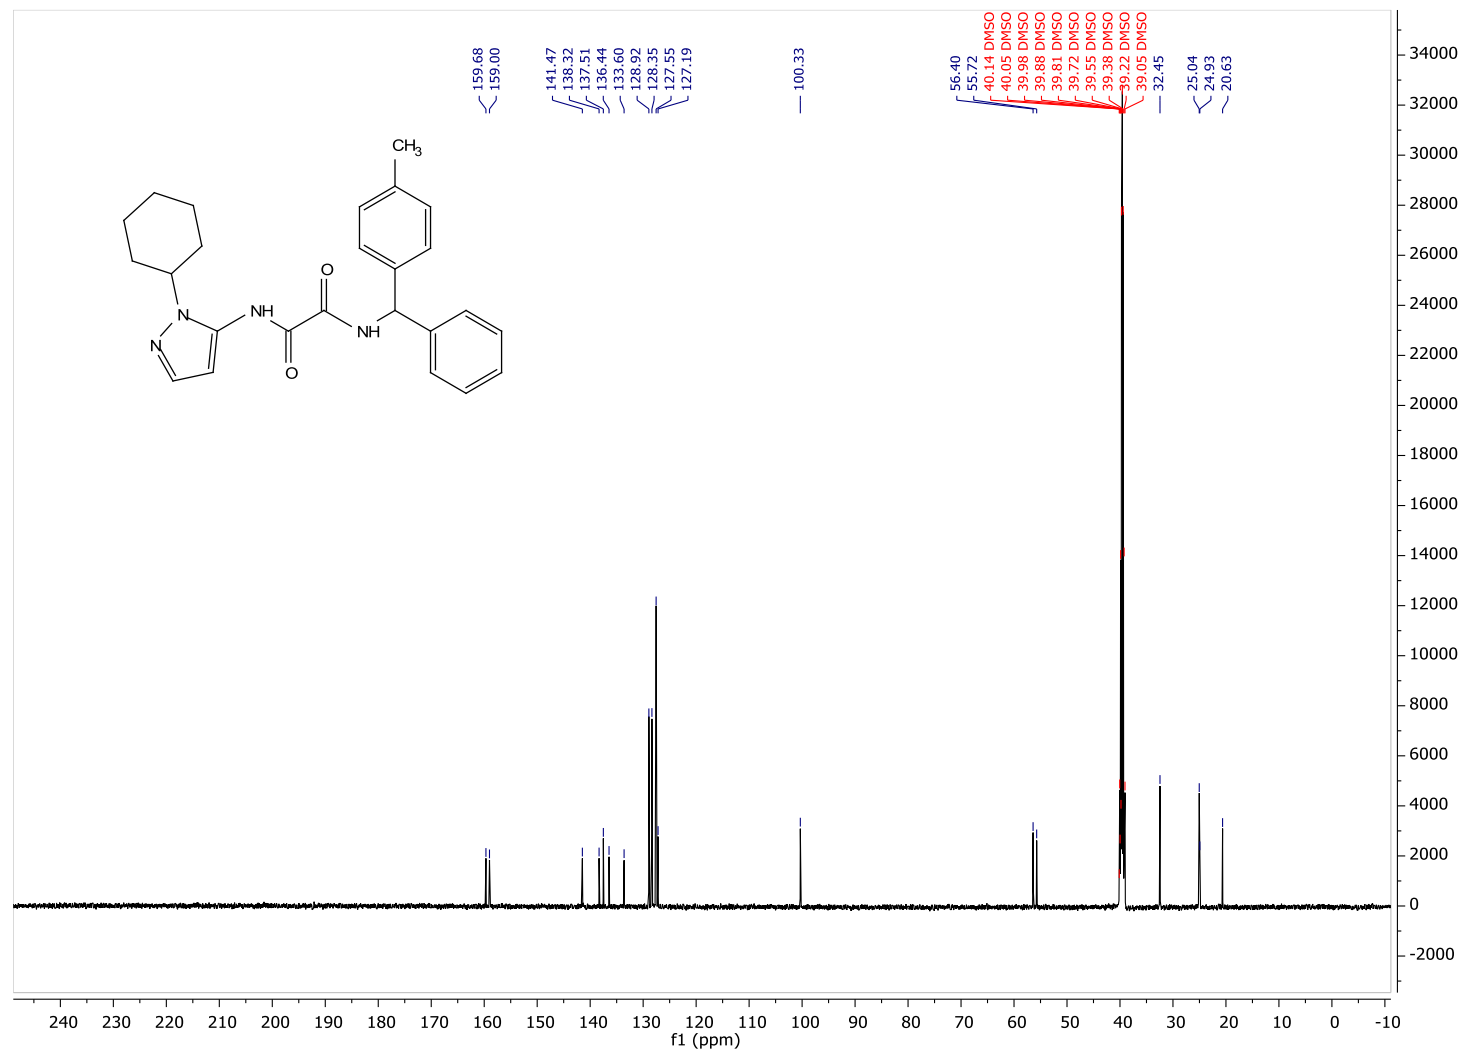

LC/MS spectrum of Z1289884410

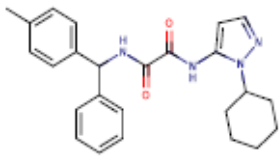

Mol Wt 416.52  
 Exact Mass 416.26

| # | Time  | Area%  |
|---|-------|--------|
| 1 | 1.369 | 100.00 |

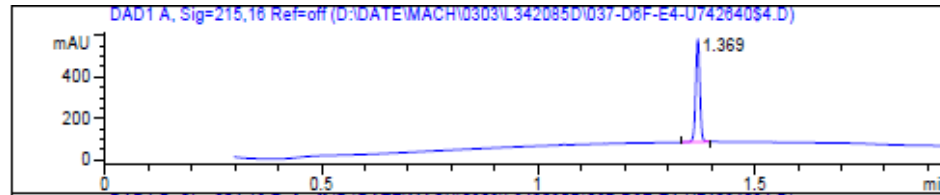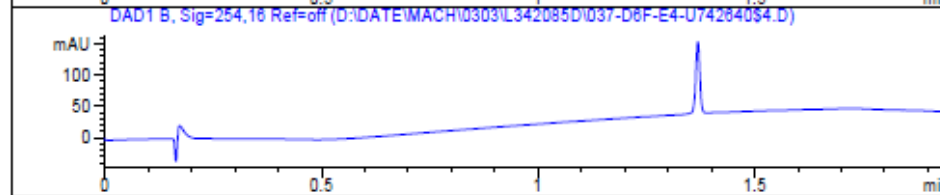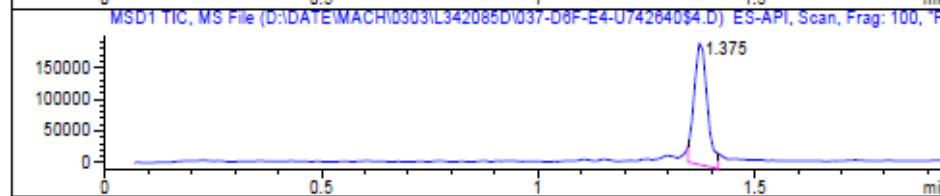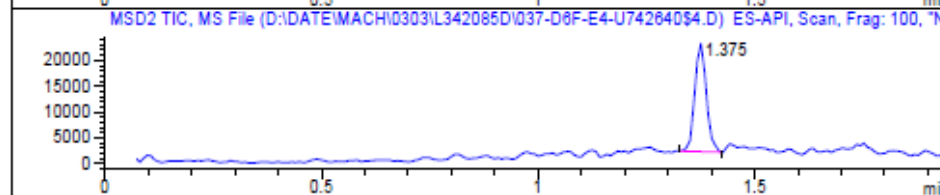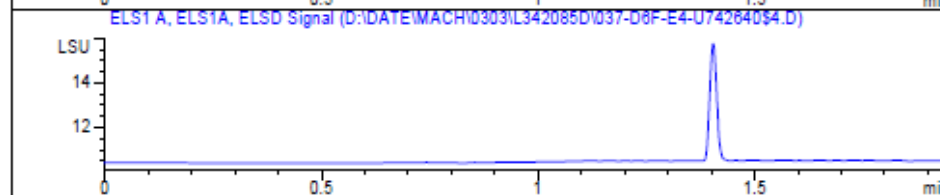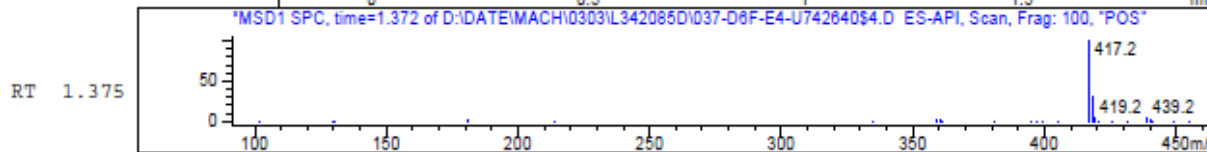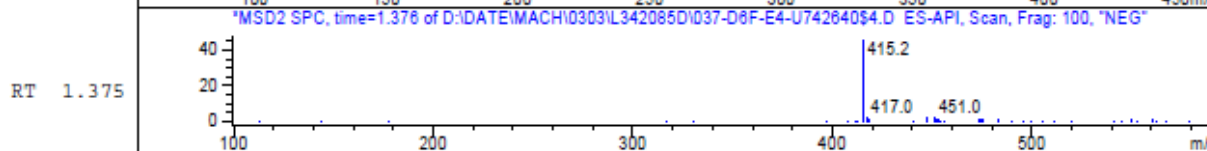

<sup>1</sup>H NMR spectrum of Z1289888474

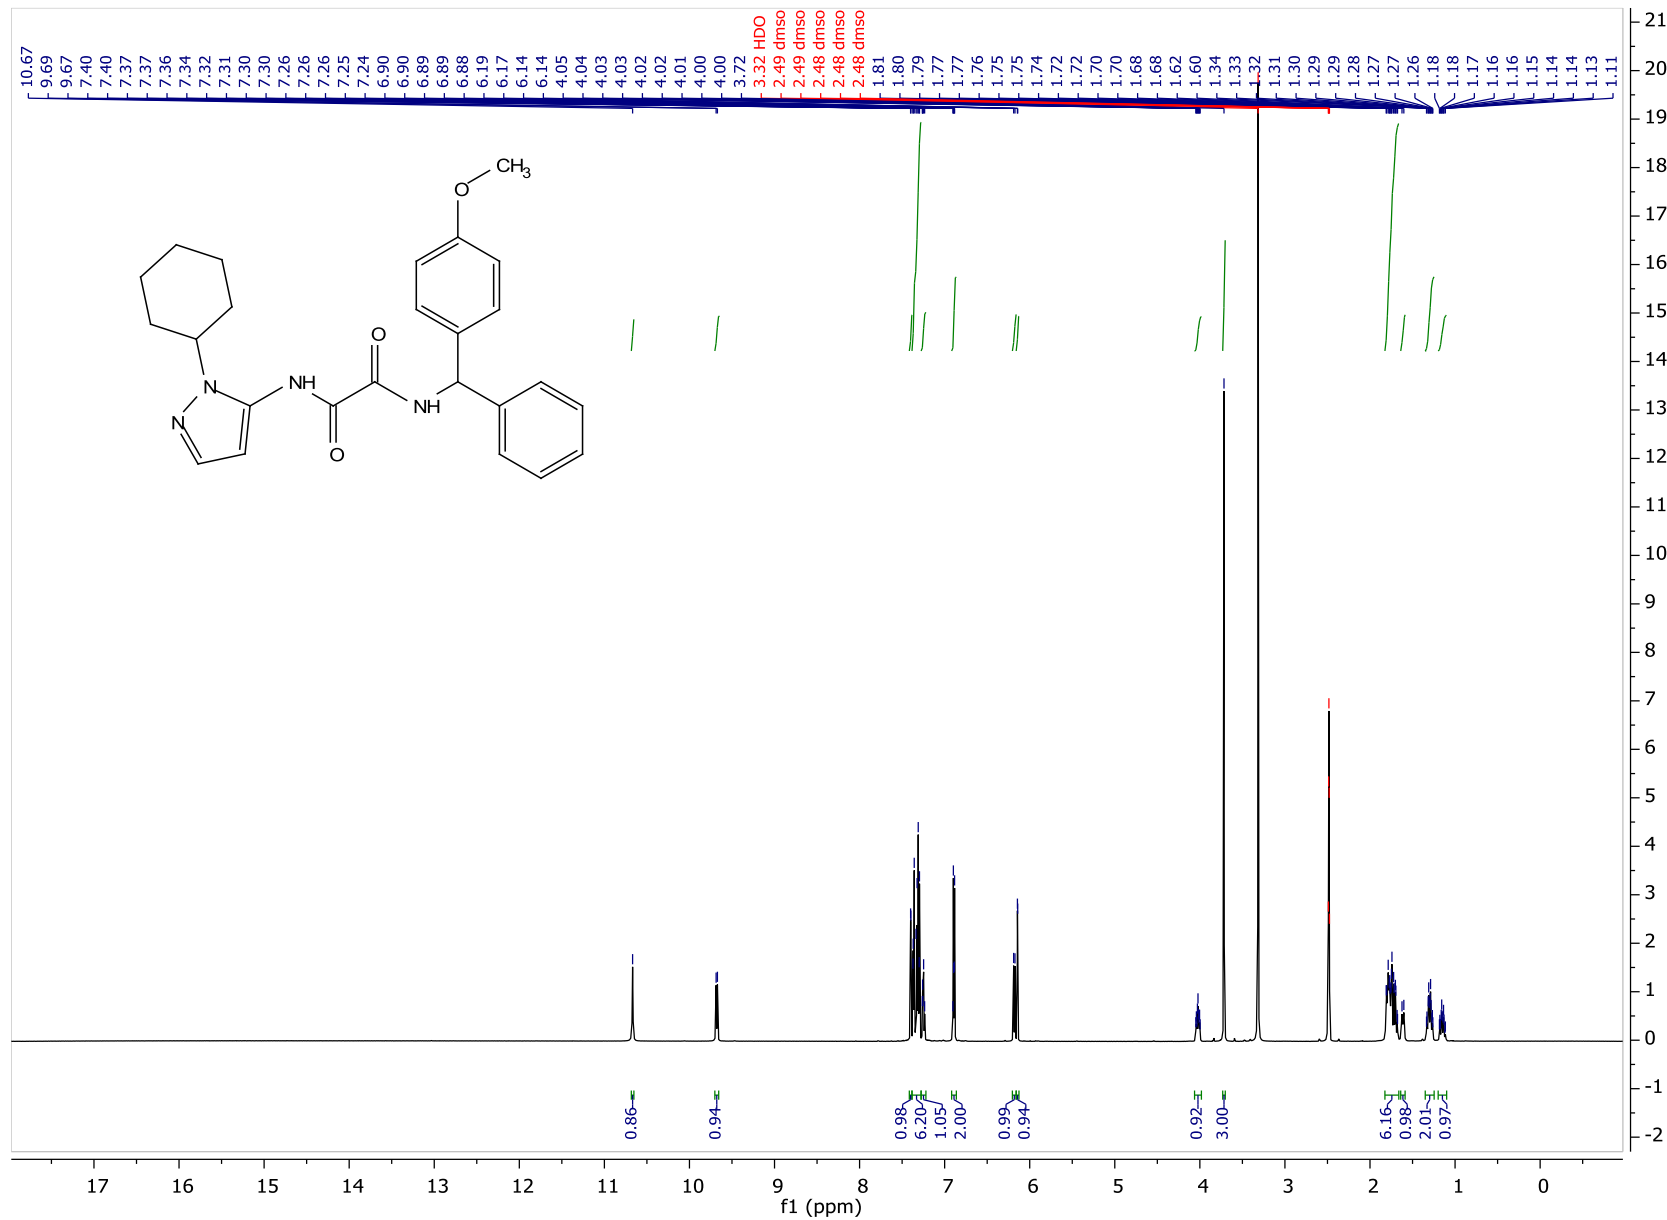



<sup>13</sup>C NMR spectrum of Z1289888474

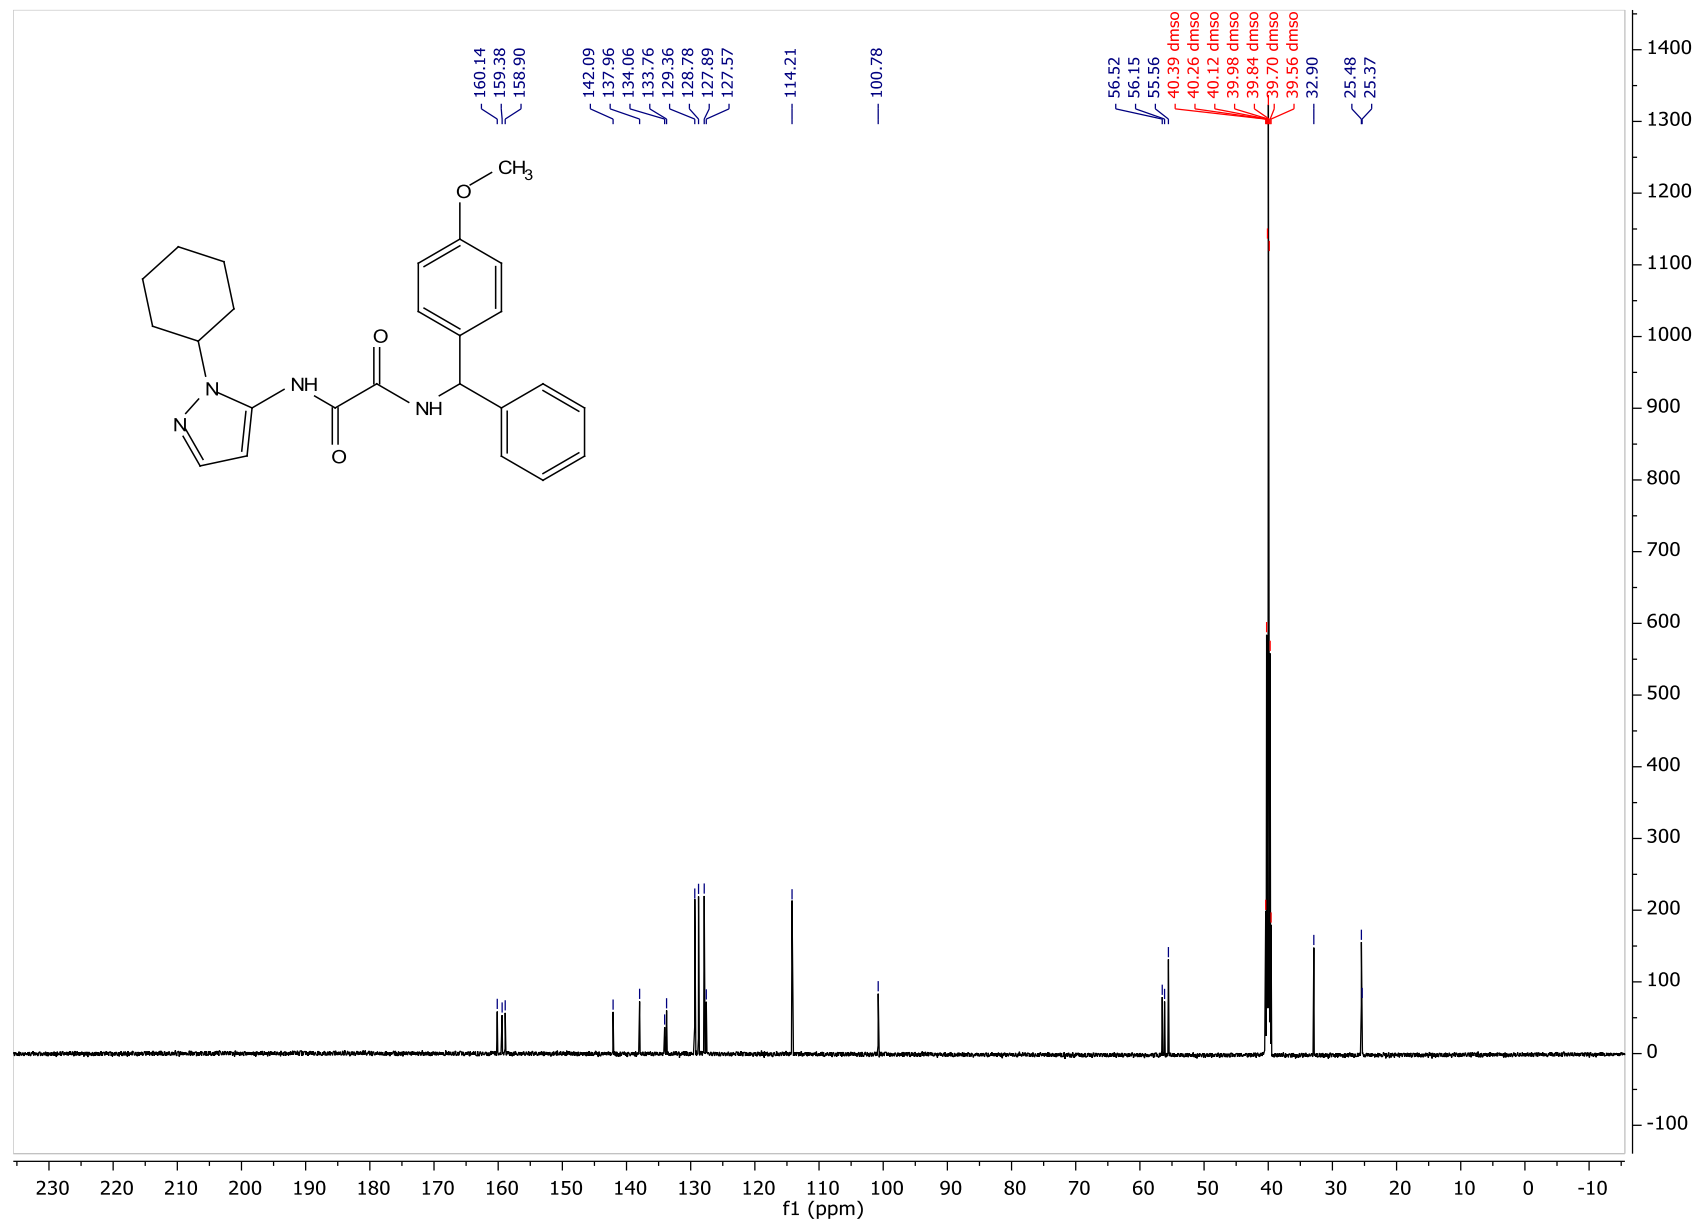

LC/MS spectrum of Z1289888474

Ret\_Time: 1.500 min

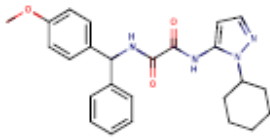

Mol Wt 432.52  
 Exact Mass 432.25

| # | Time  | Area%  |
|---|-------|--------|
| 1 | 1.500 | 100.00 |

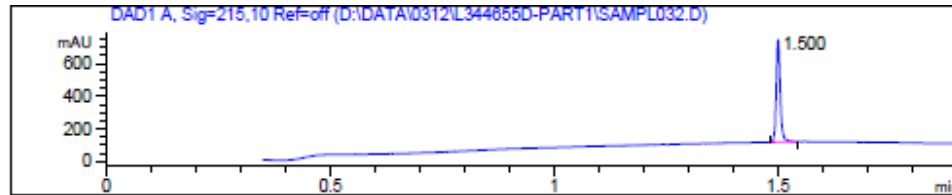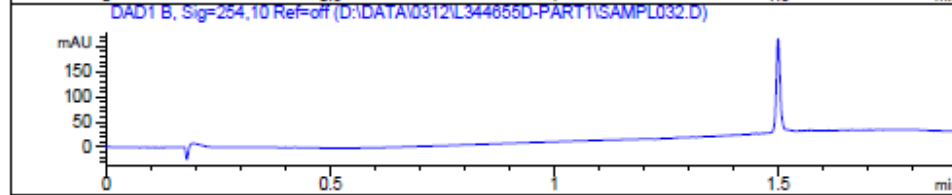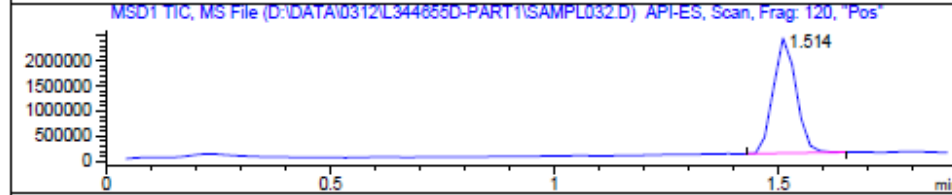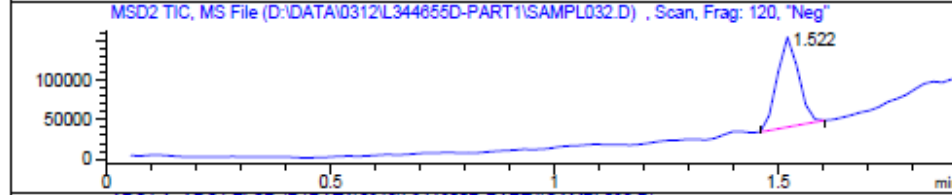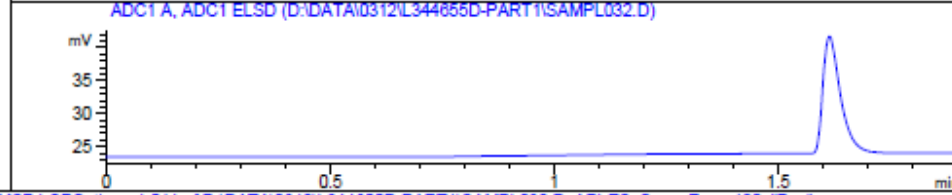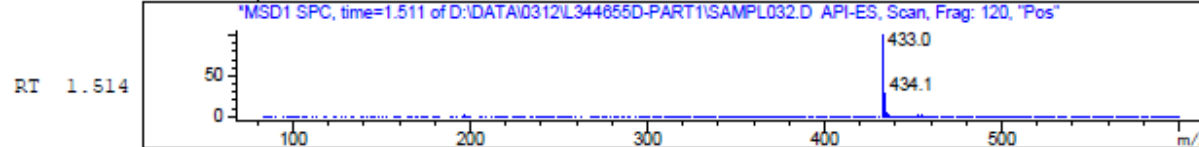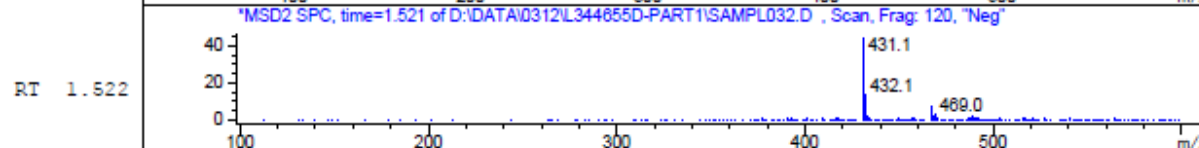

<sup>1</sup>H NMR spectrum of Z1289963826

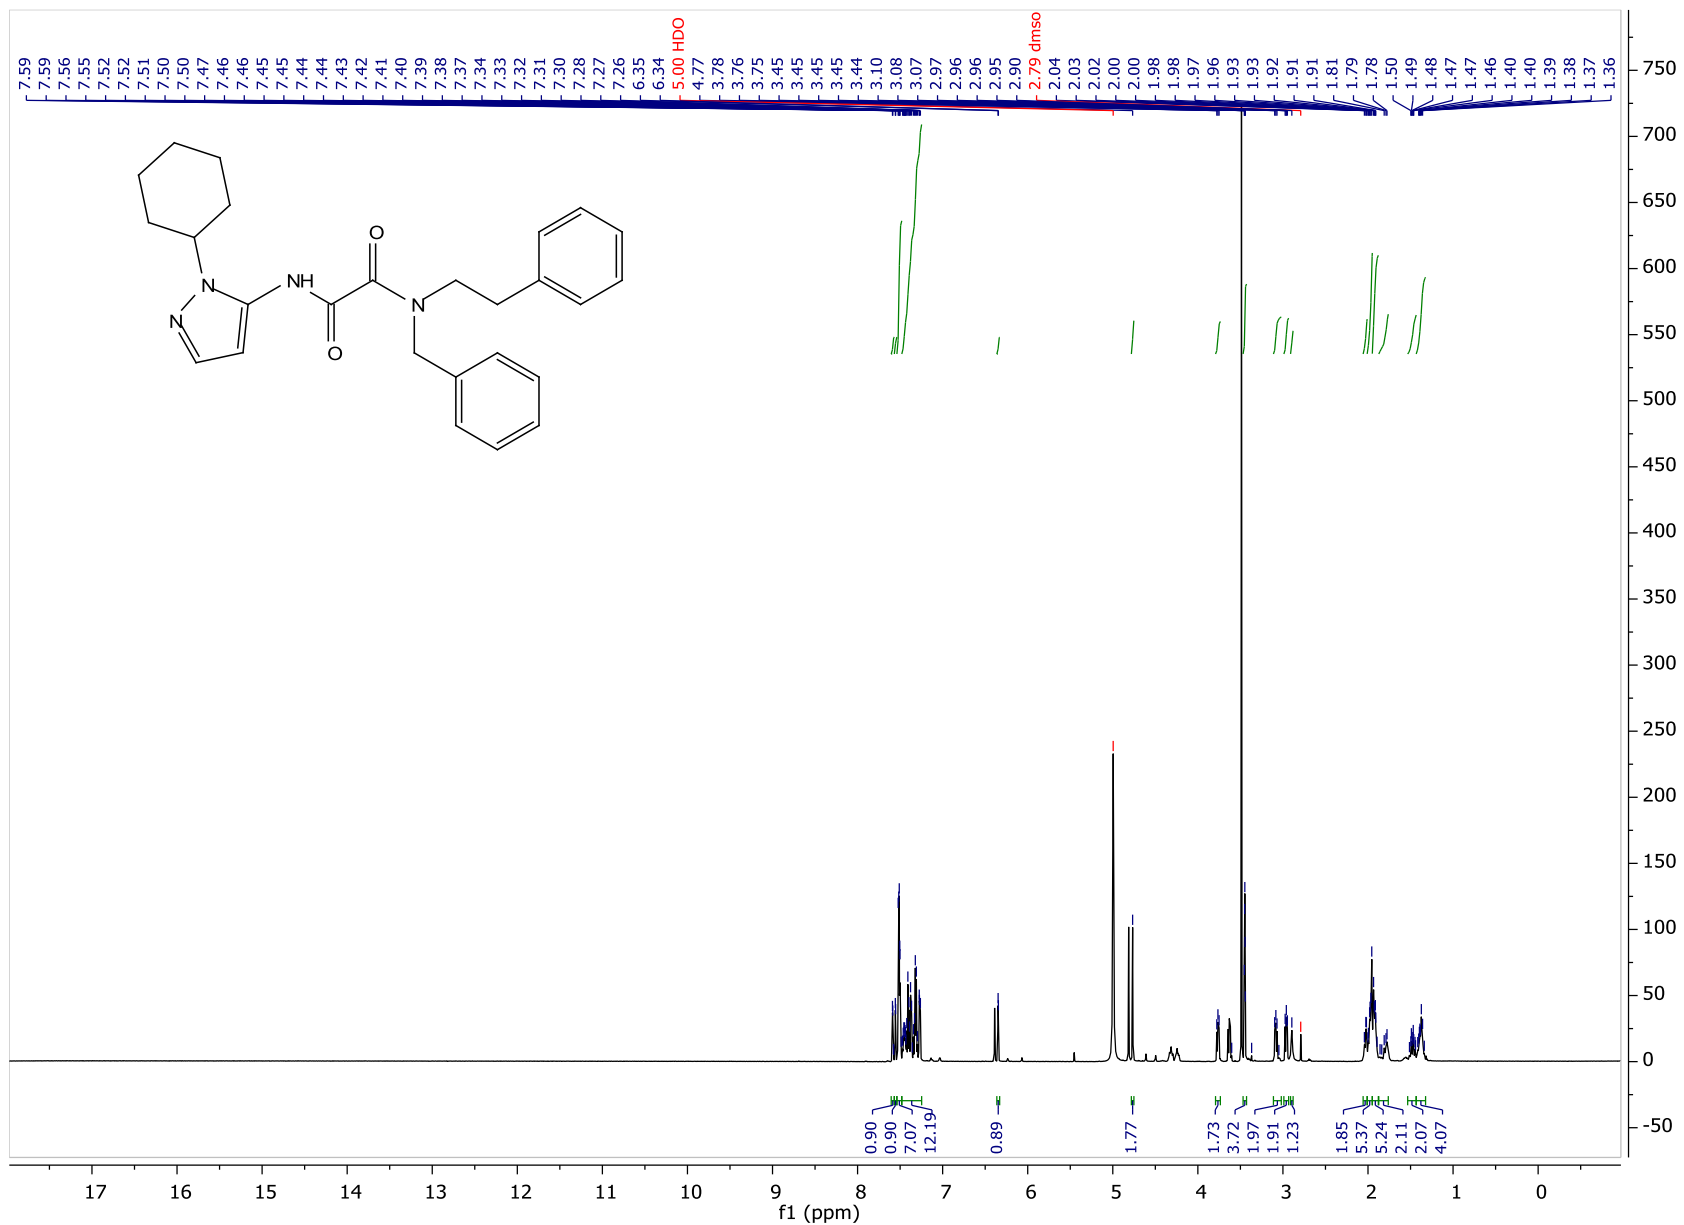

<sup>13</sup>C NMR spectrum of Z1289963826

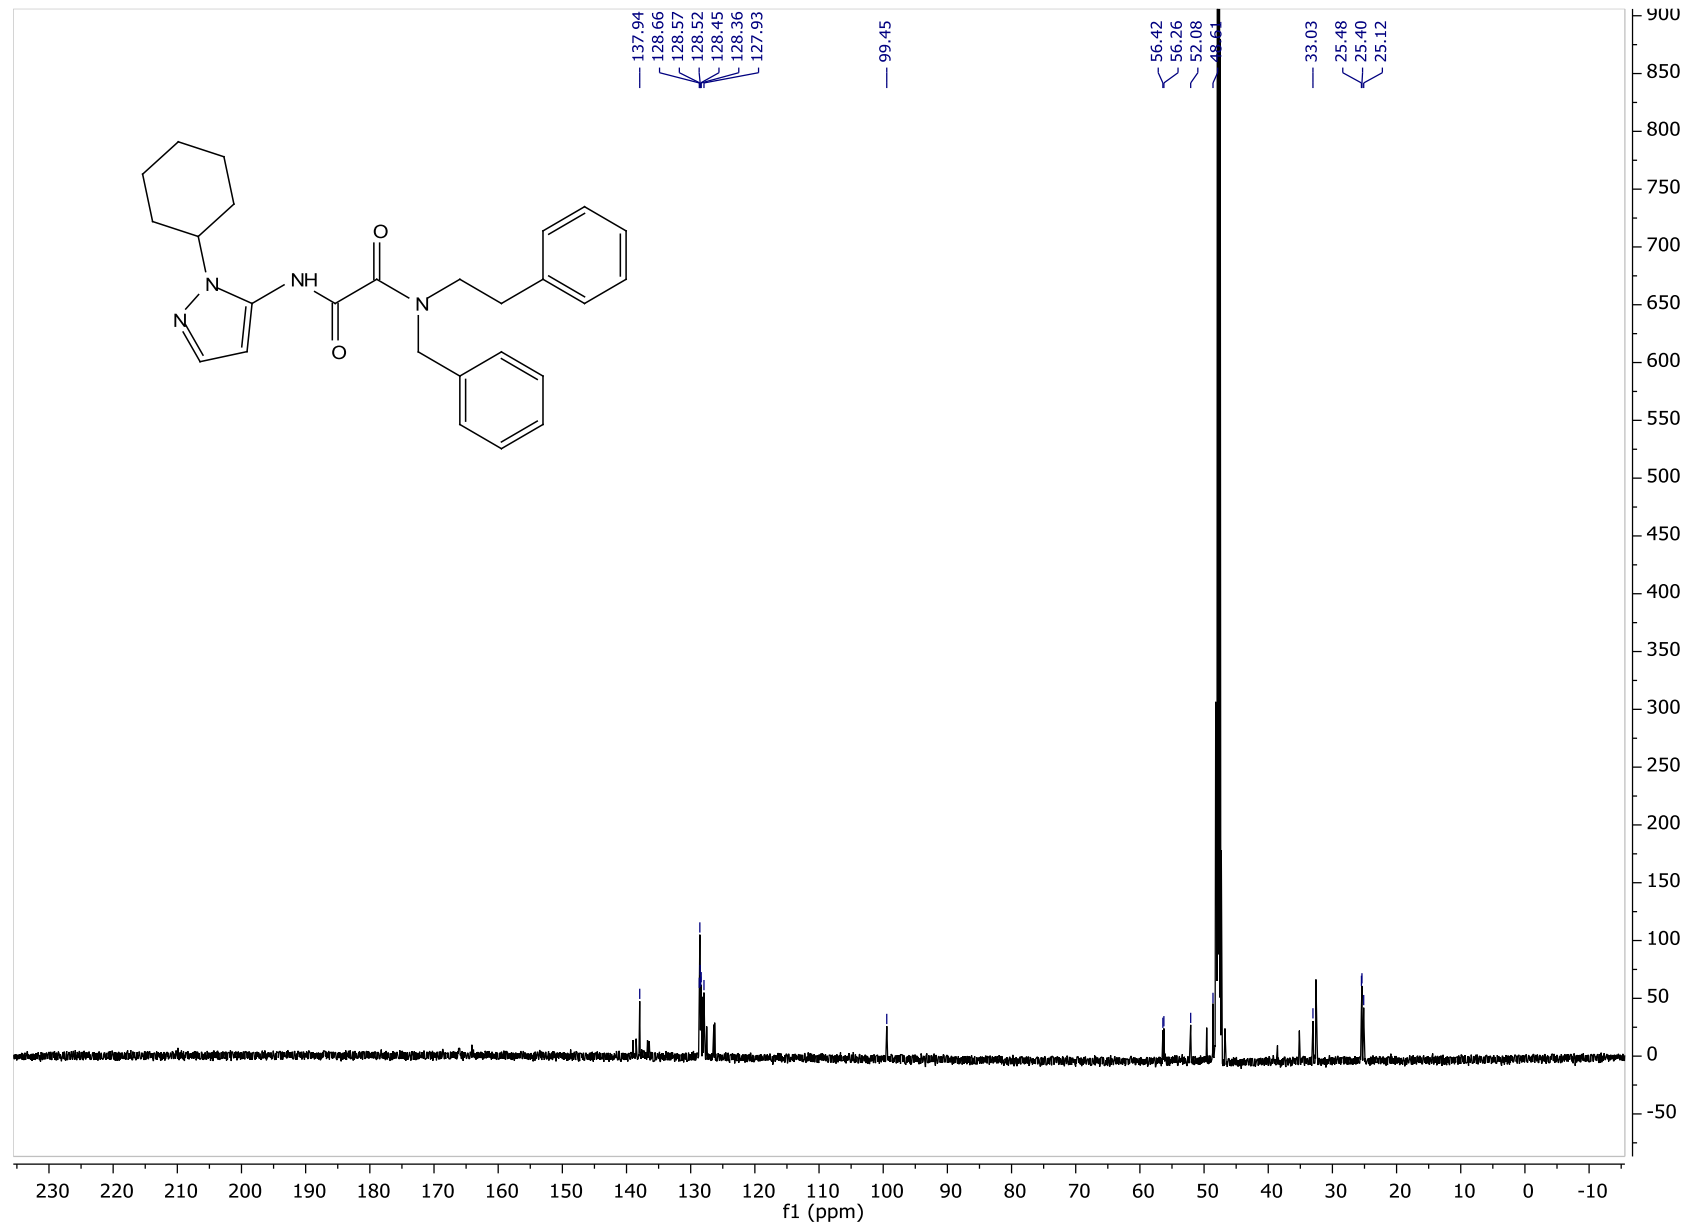

LC/MS spectrum of Z1289963826

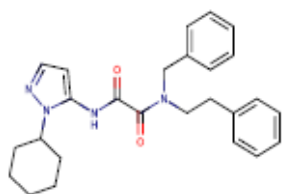

Mol Wt 430.54  
 Exact Mass 430.28

| # | Time  | Area%  |
|---|-------|--------|
| 1 | 1.616 | 100.00 |

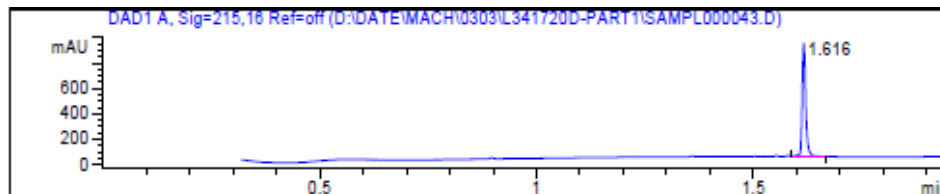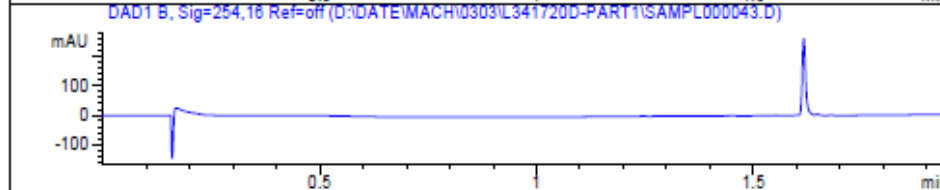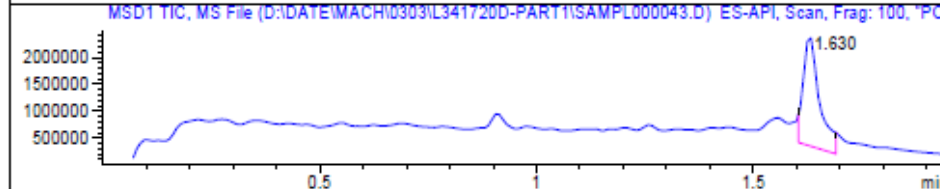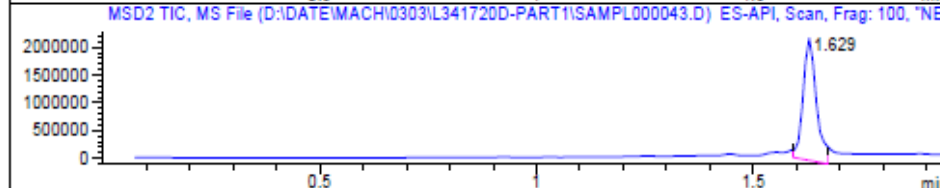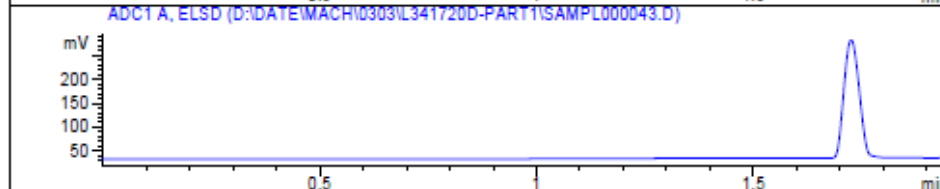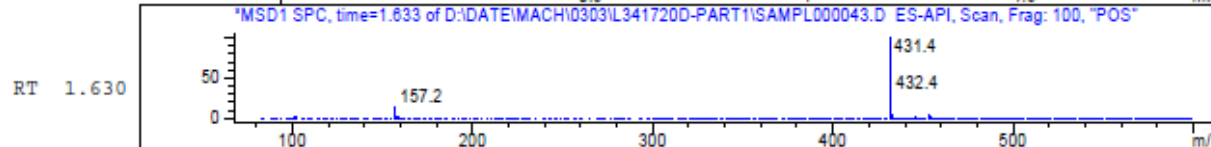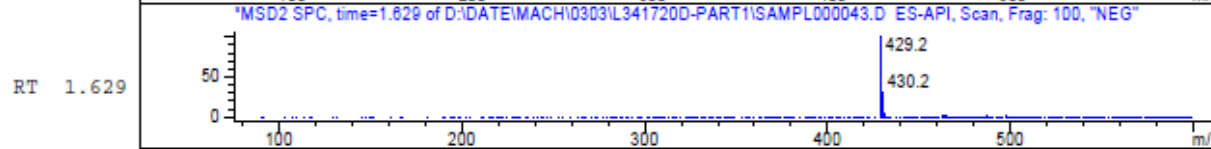

<sup>1</sup>H NMR spectrum of Z1290044889

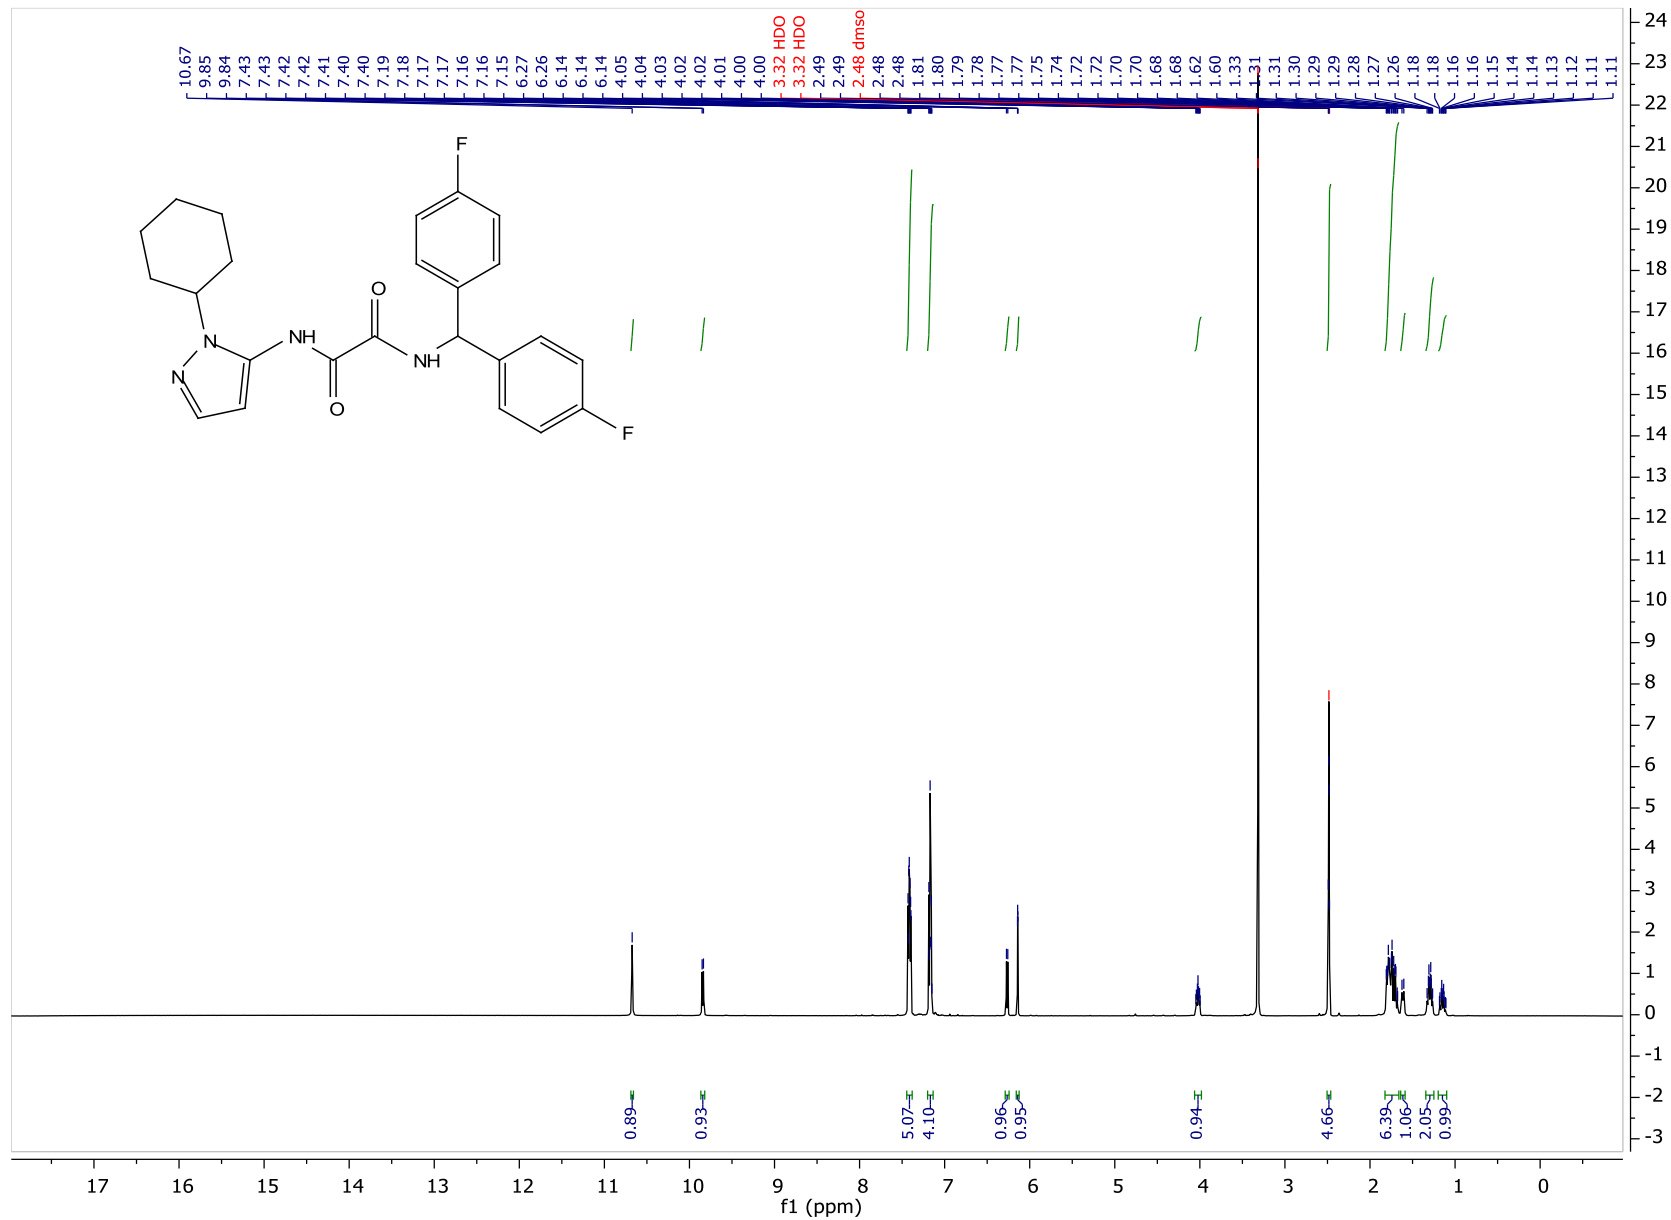

<sup>13</sup>C NMR spectrum of Z1290044889

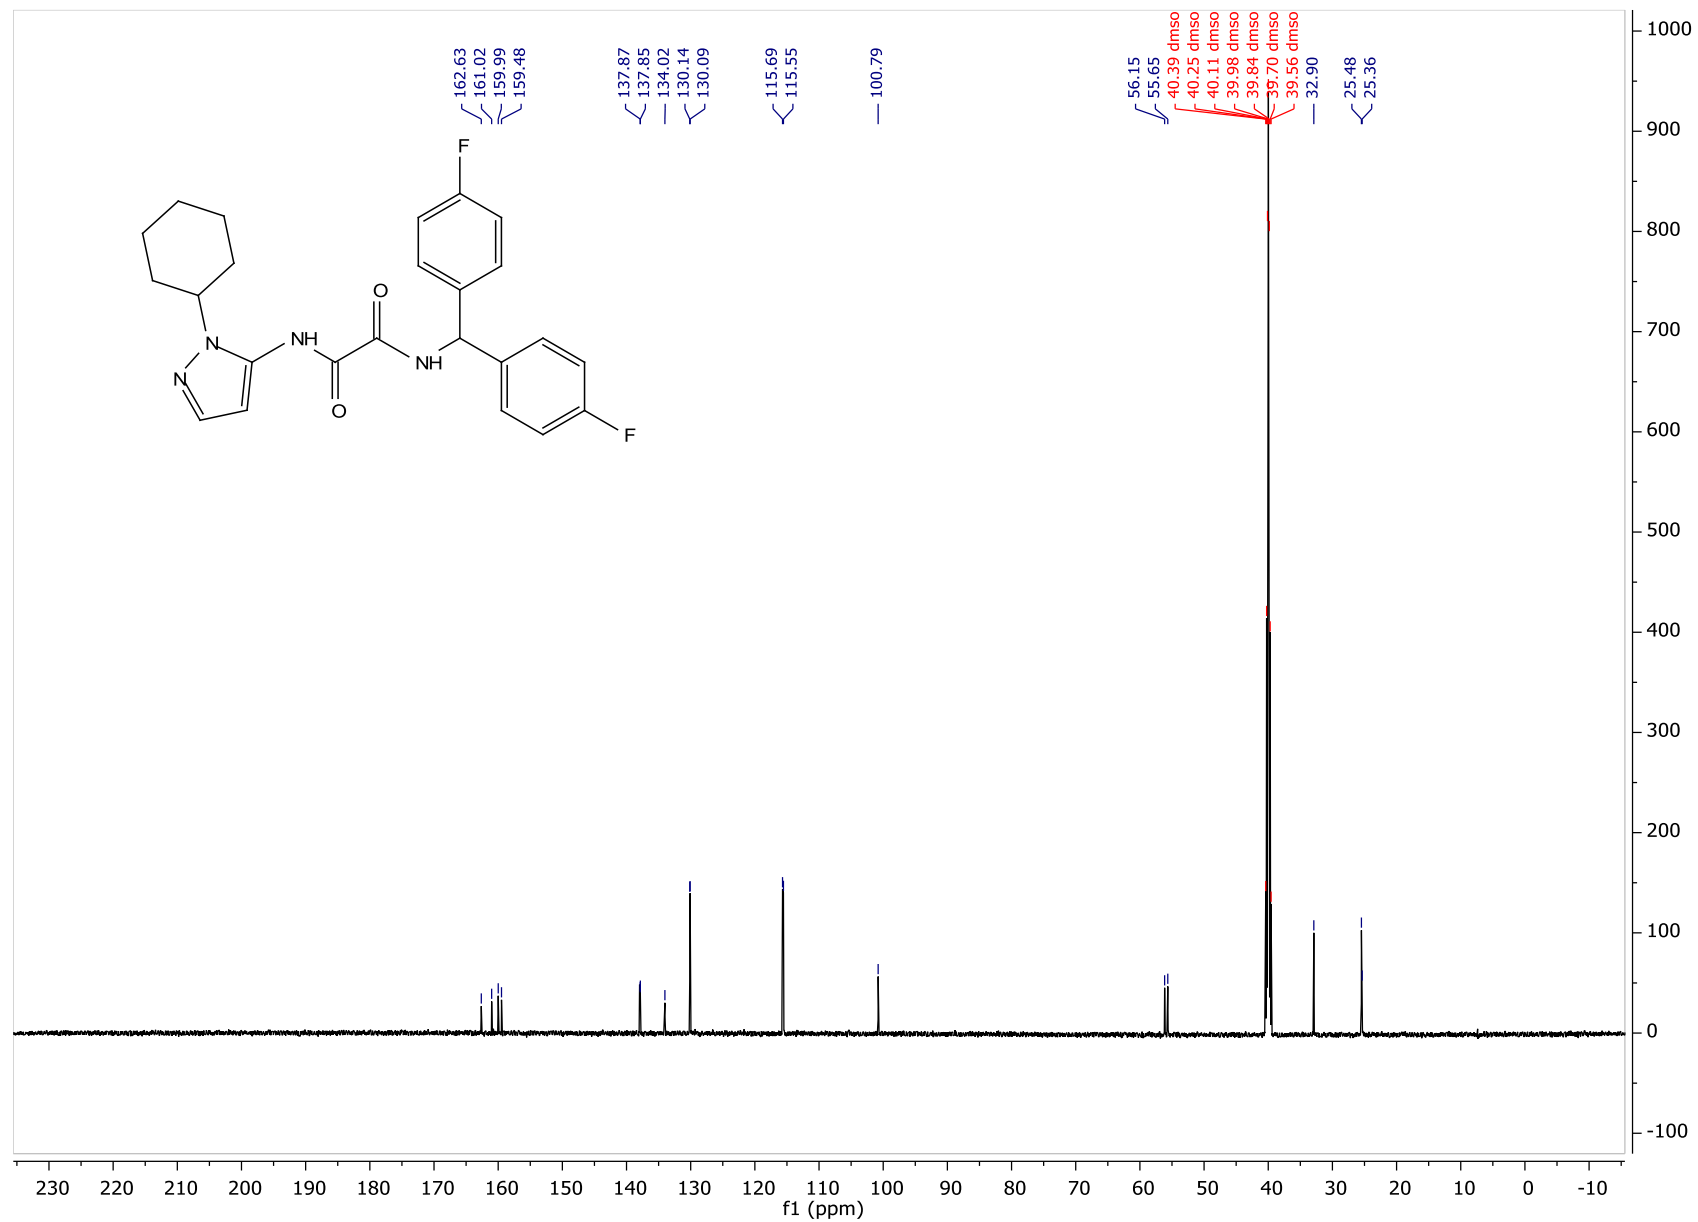

LC/MS spectrum of Z1290044889

Ret\_Time: 1.577 min

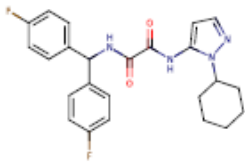

Mol Wt 438.47  
Exact Mass 438.22

| # | Time  | Area% |
|---|-------|-------|
| 1 | 1.076 | 2.03  |
| 2 | 1.577 | 97.97 |

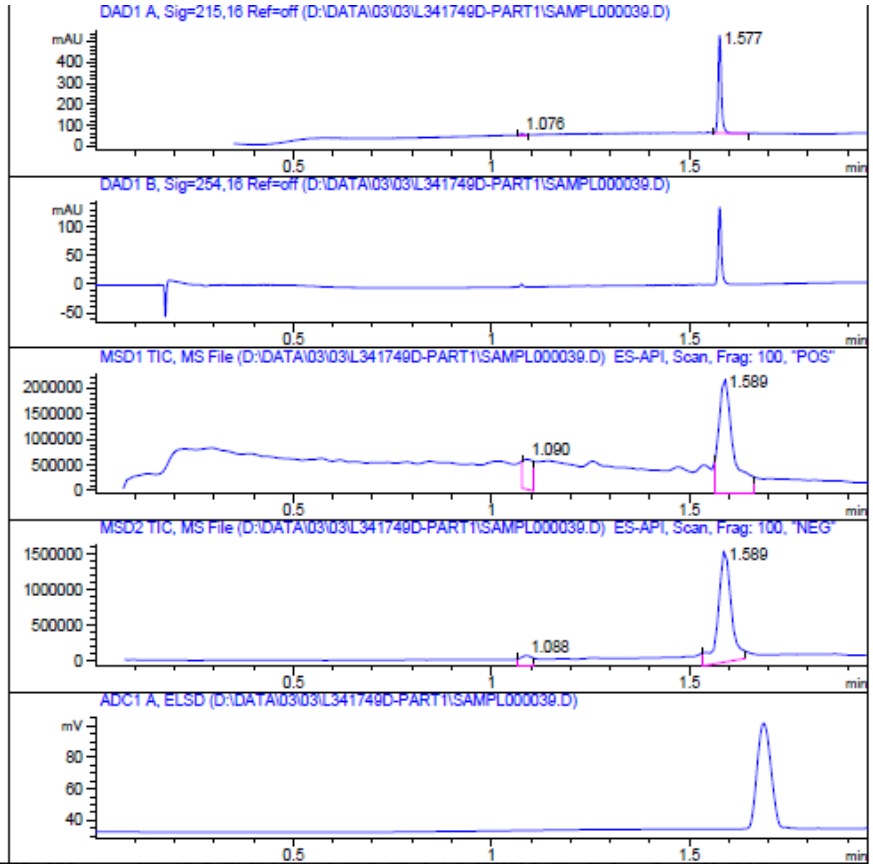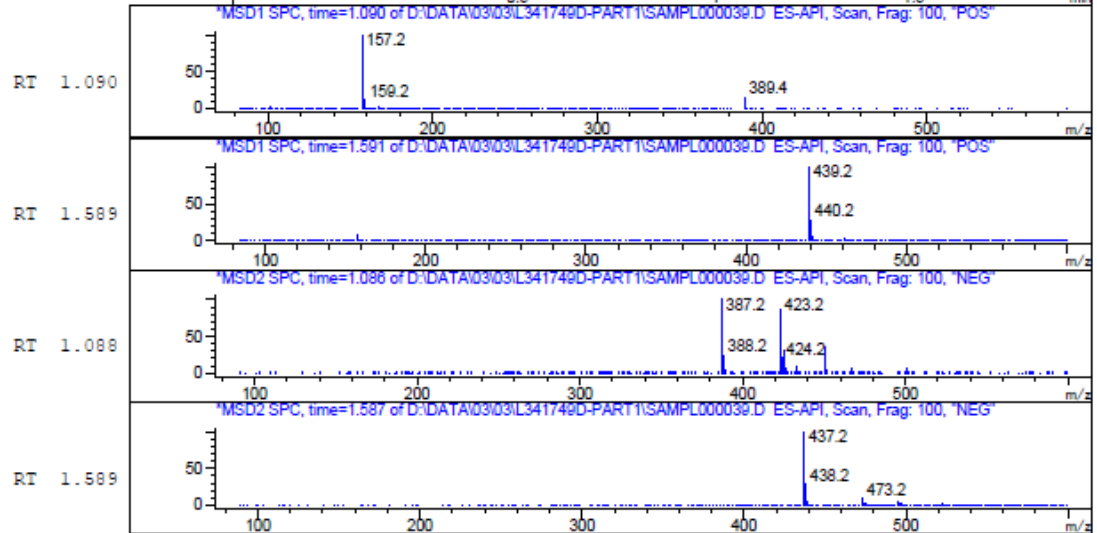



<sup>1</sup>H NMR spectrum of Z1290183067

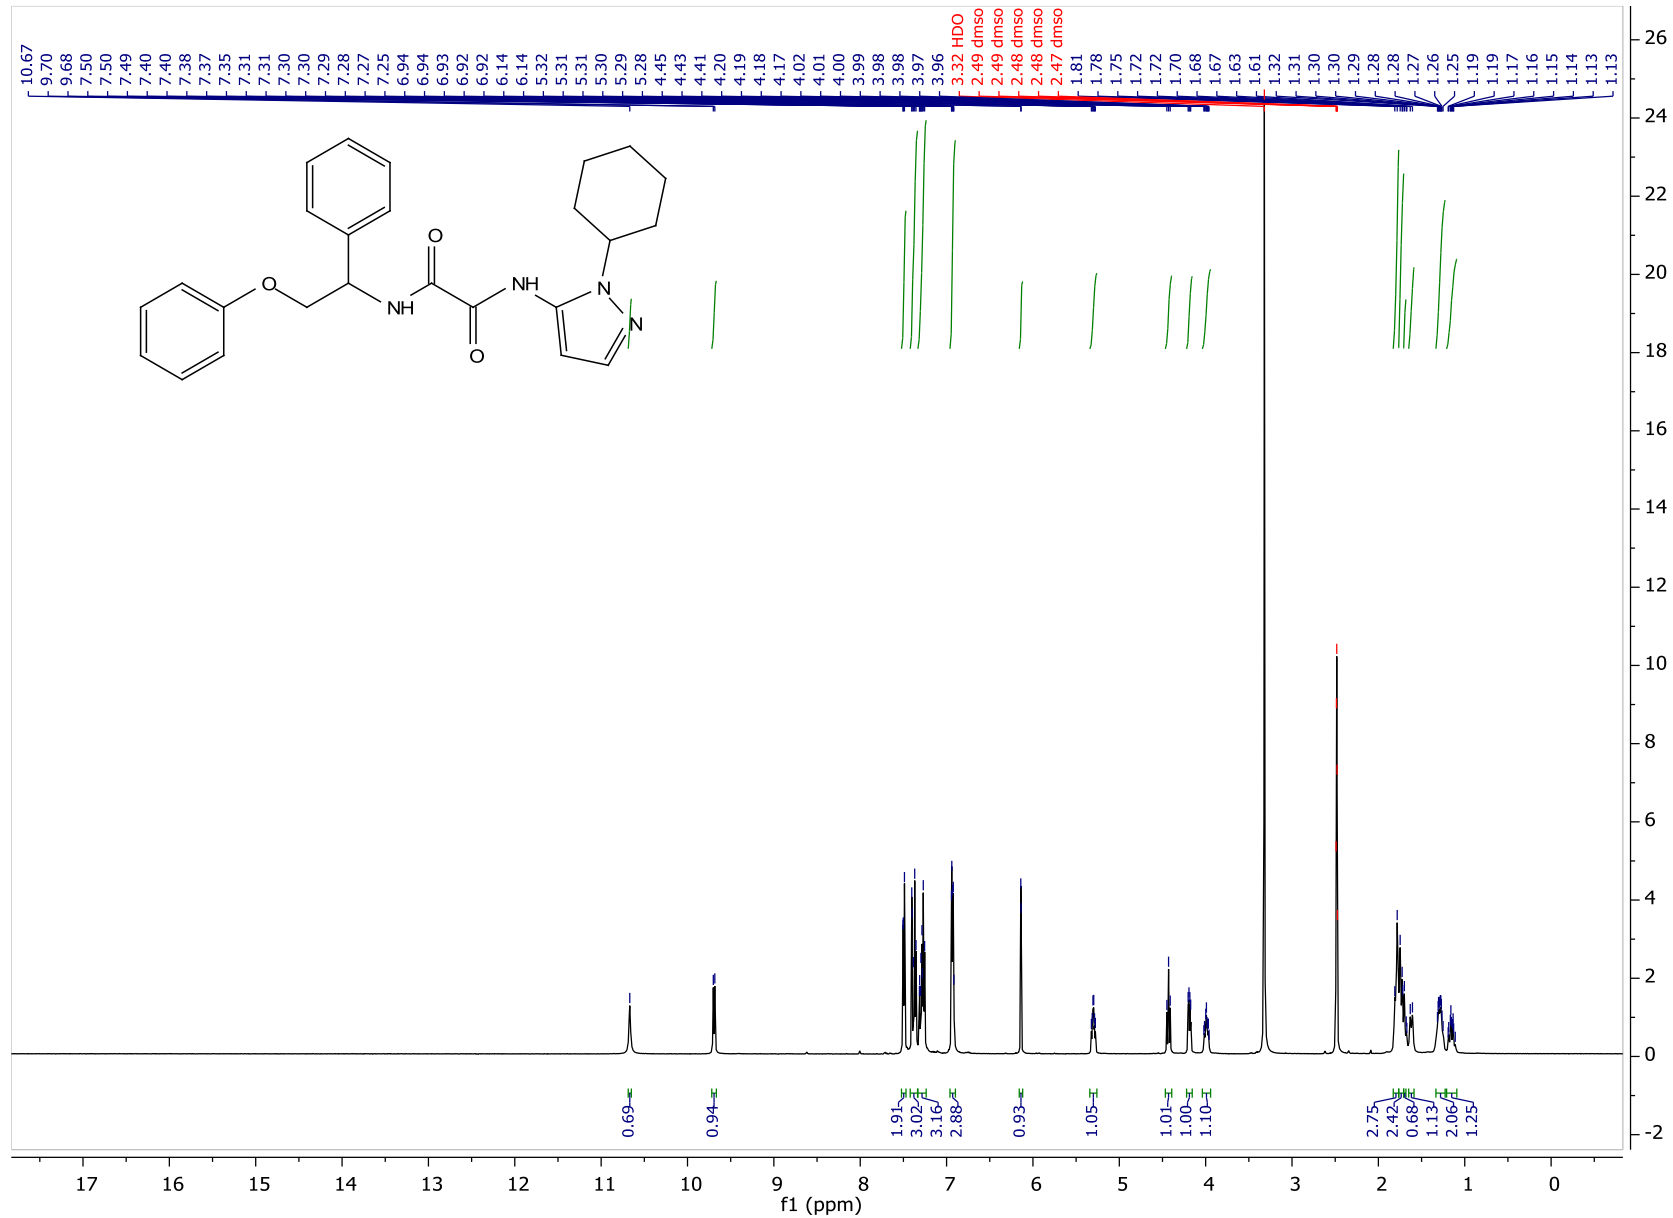

<sup>13</sup>C NMR spectrum of Z1290183067

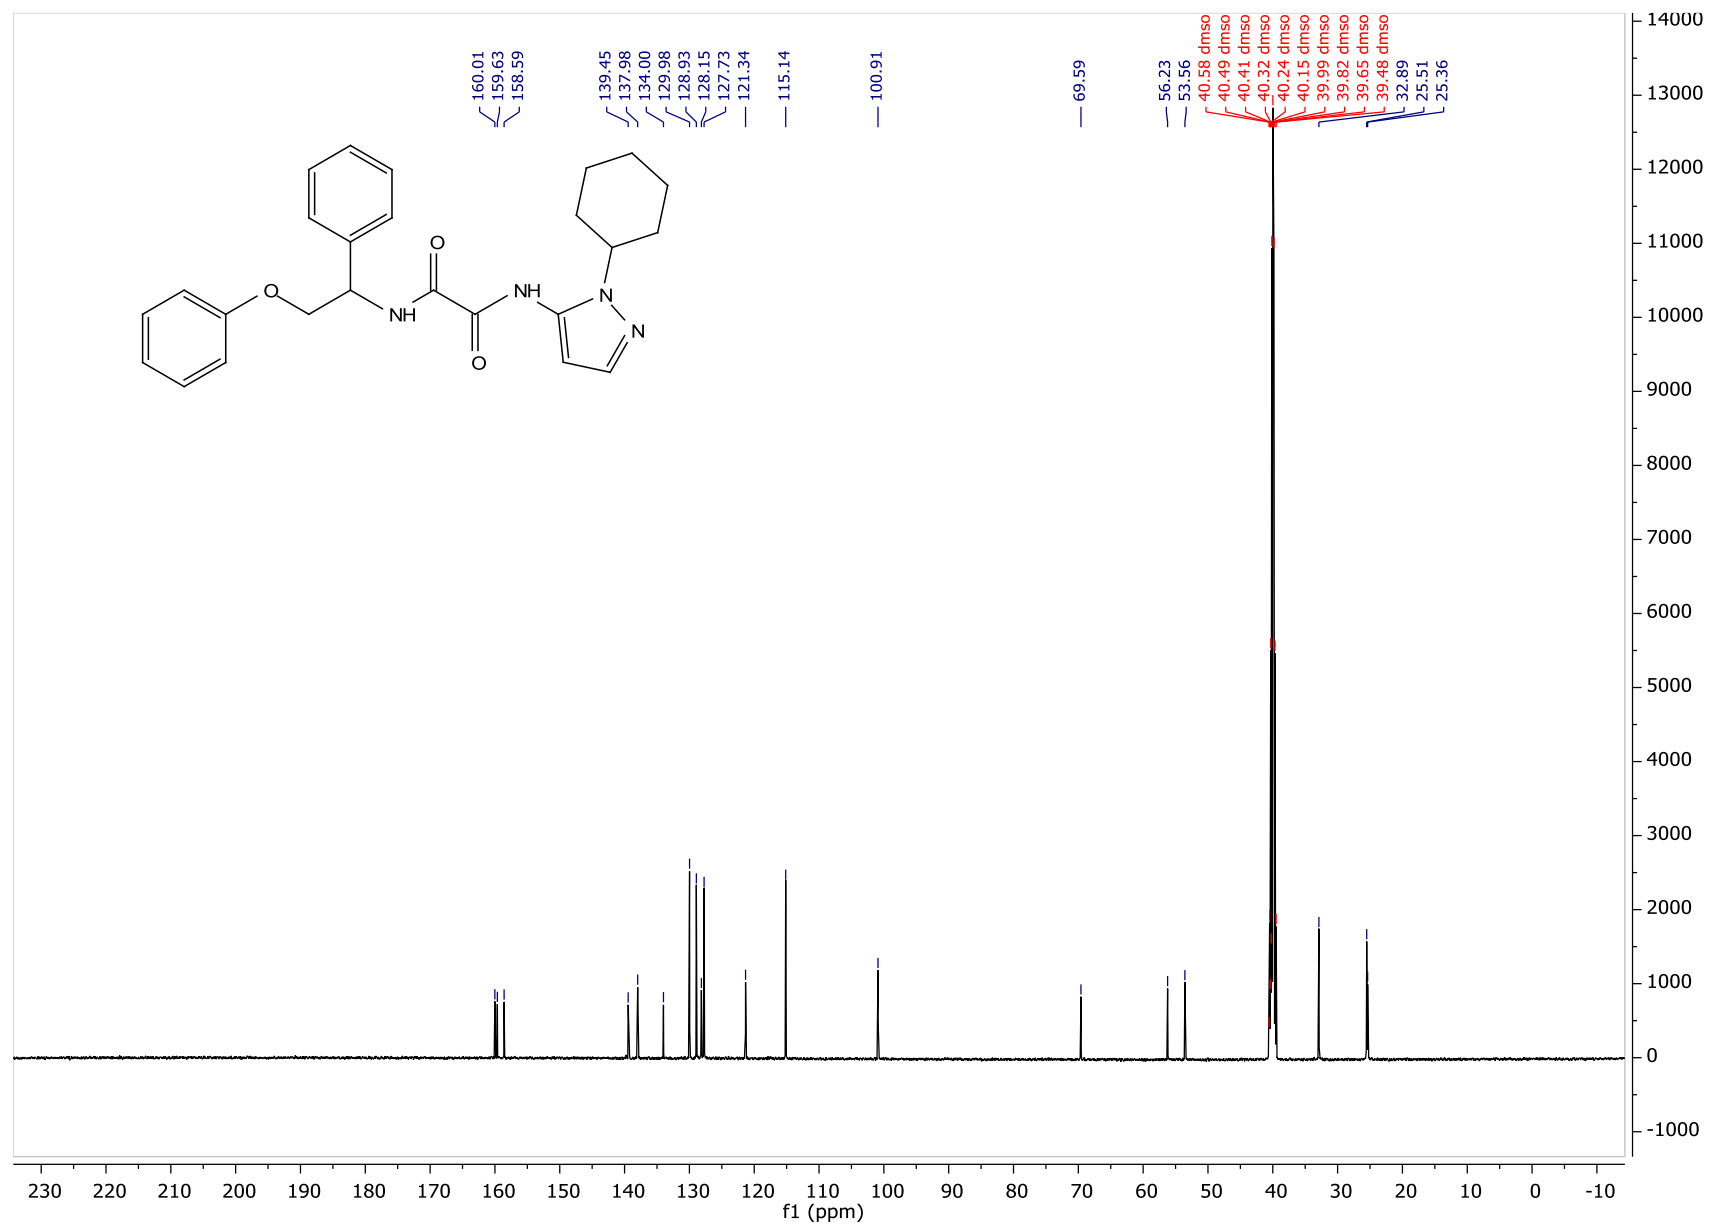

LC/MS spectrum of Z1290183067

Ret\_Time: 1.483 min

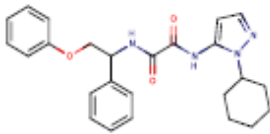

Mol Wt 432.52  
Exact Mass 432.25

| # | Time  | Area%  |
|---|-------|--------|
| 1 | 1.483 | 100.00 |

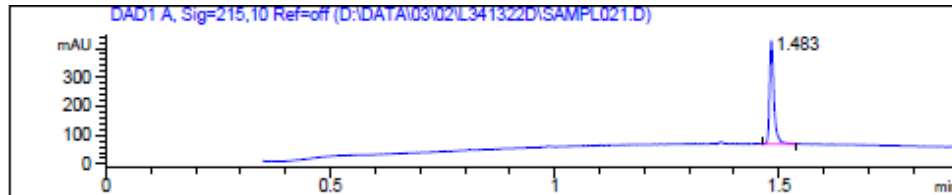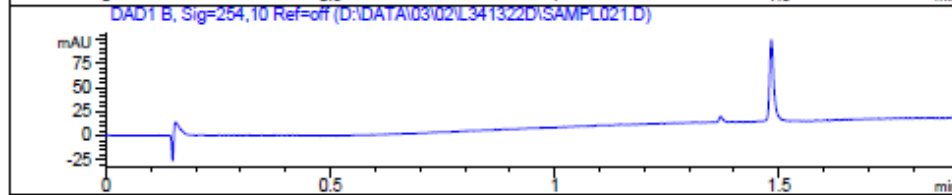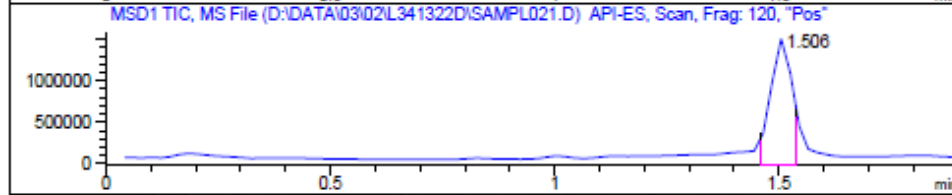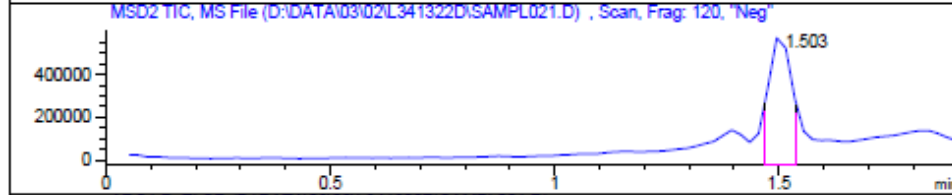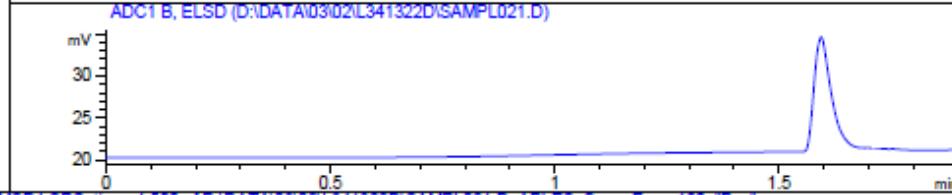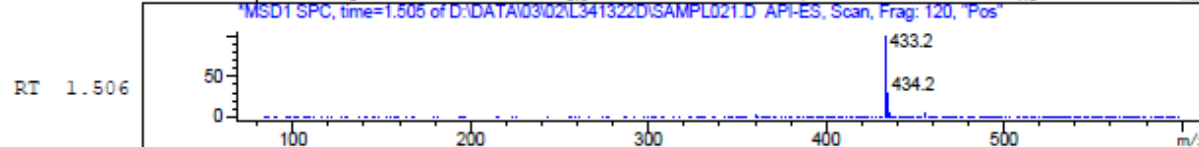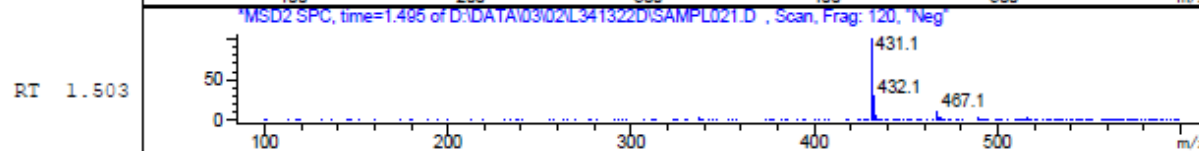

<sup>1</sup>H NMR spectrum of Z1480332192

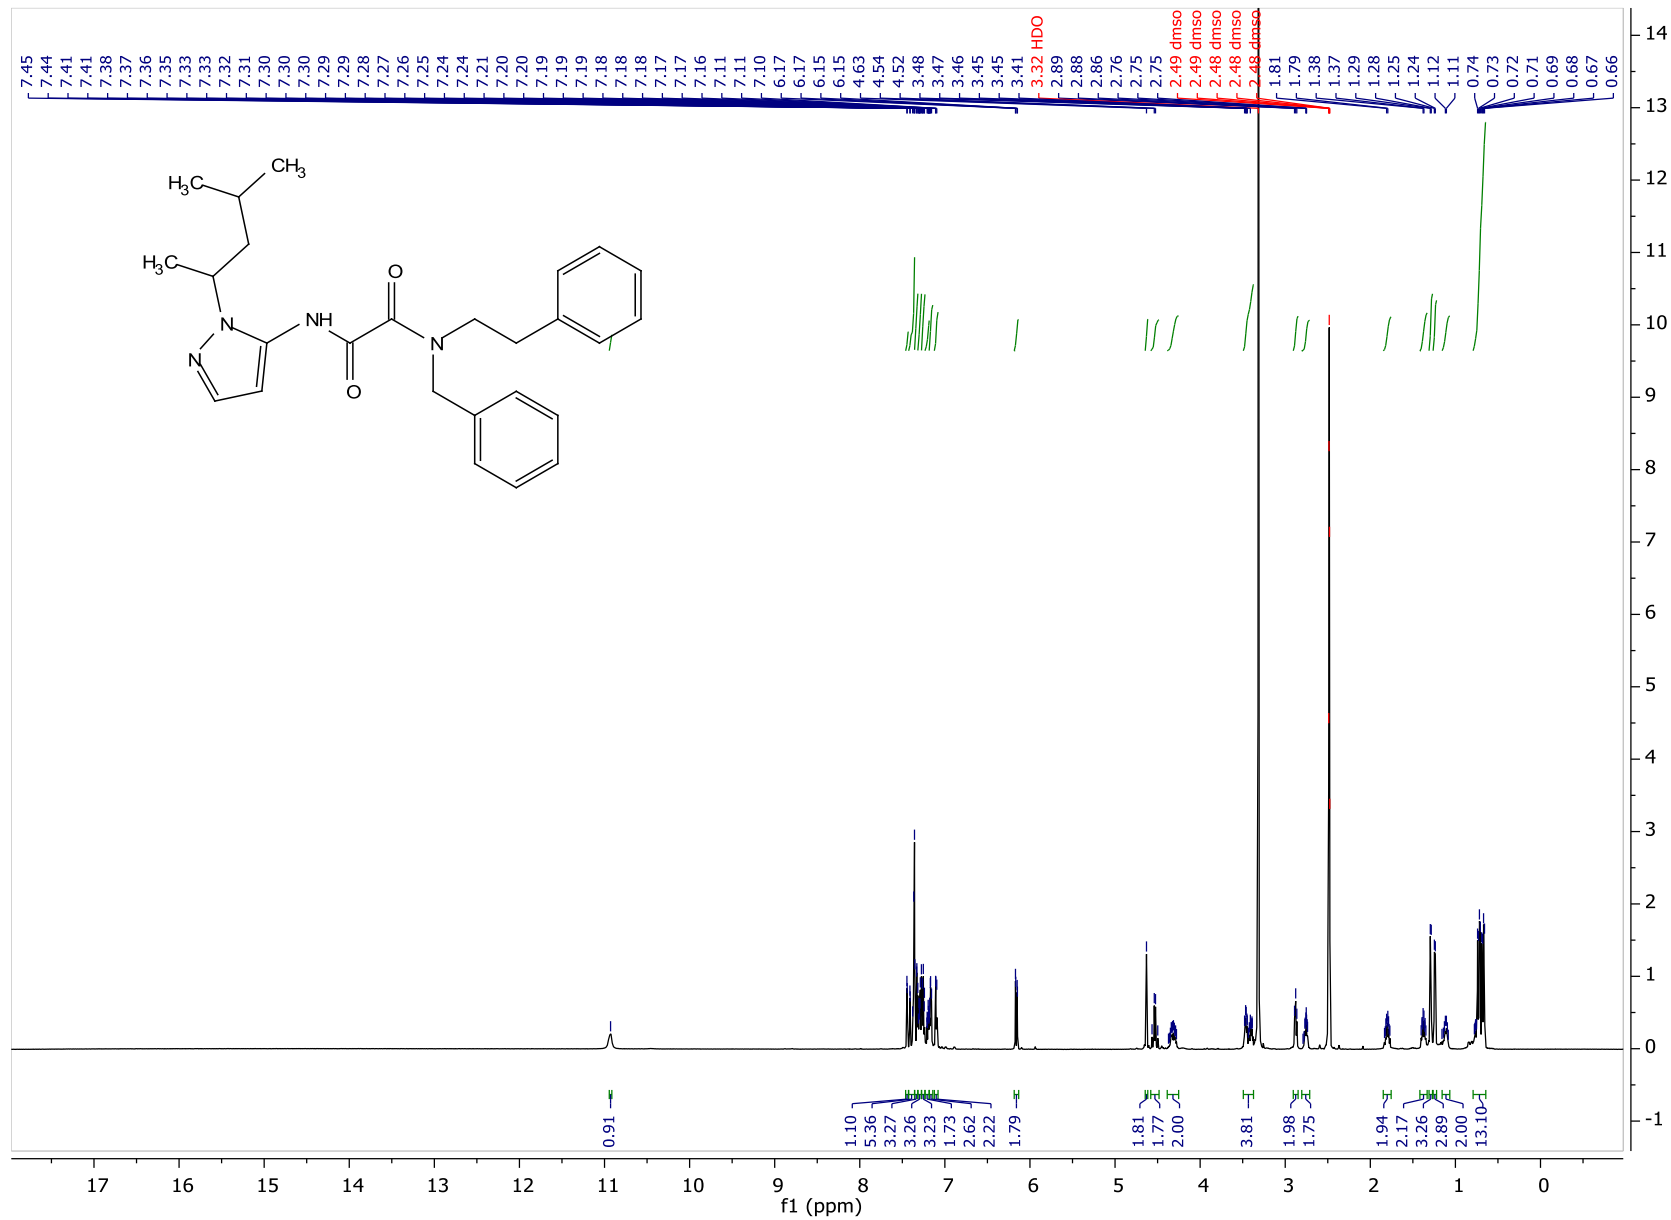

<sup>13</sup>C NMR spectrum of Z1480332192

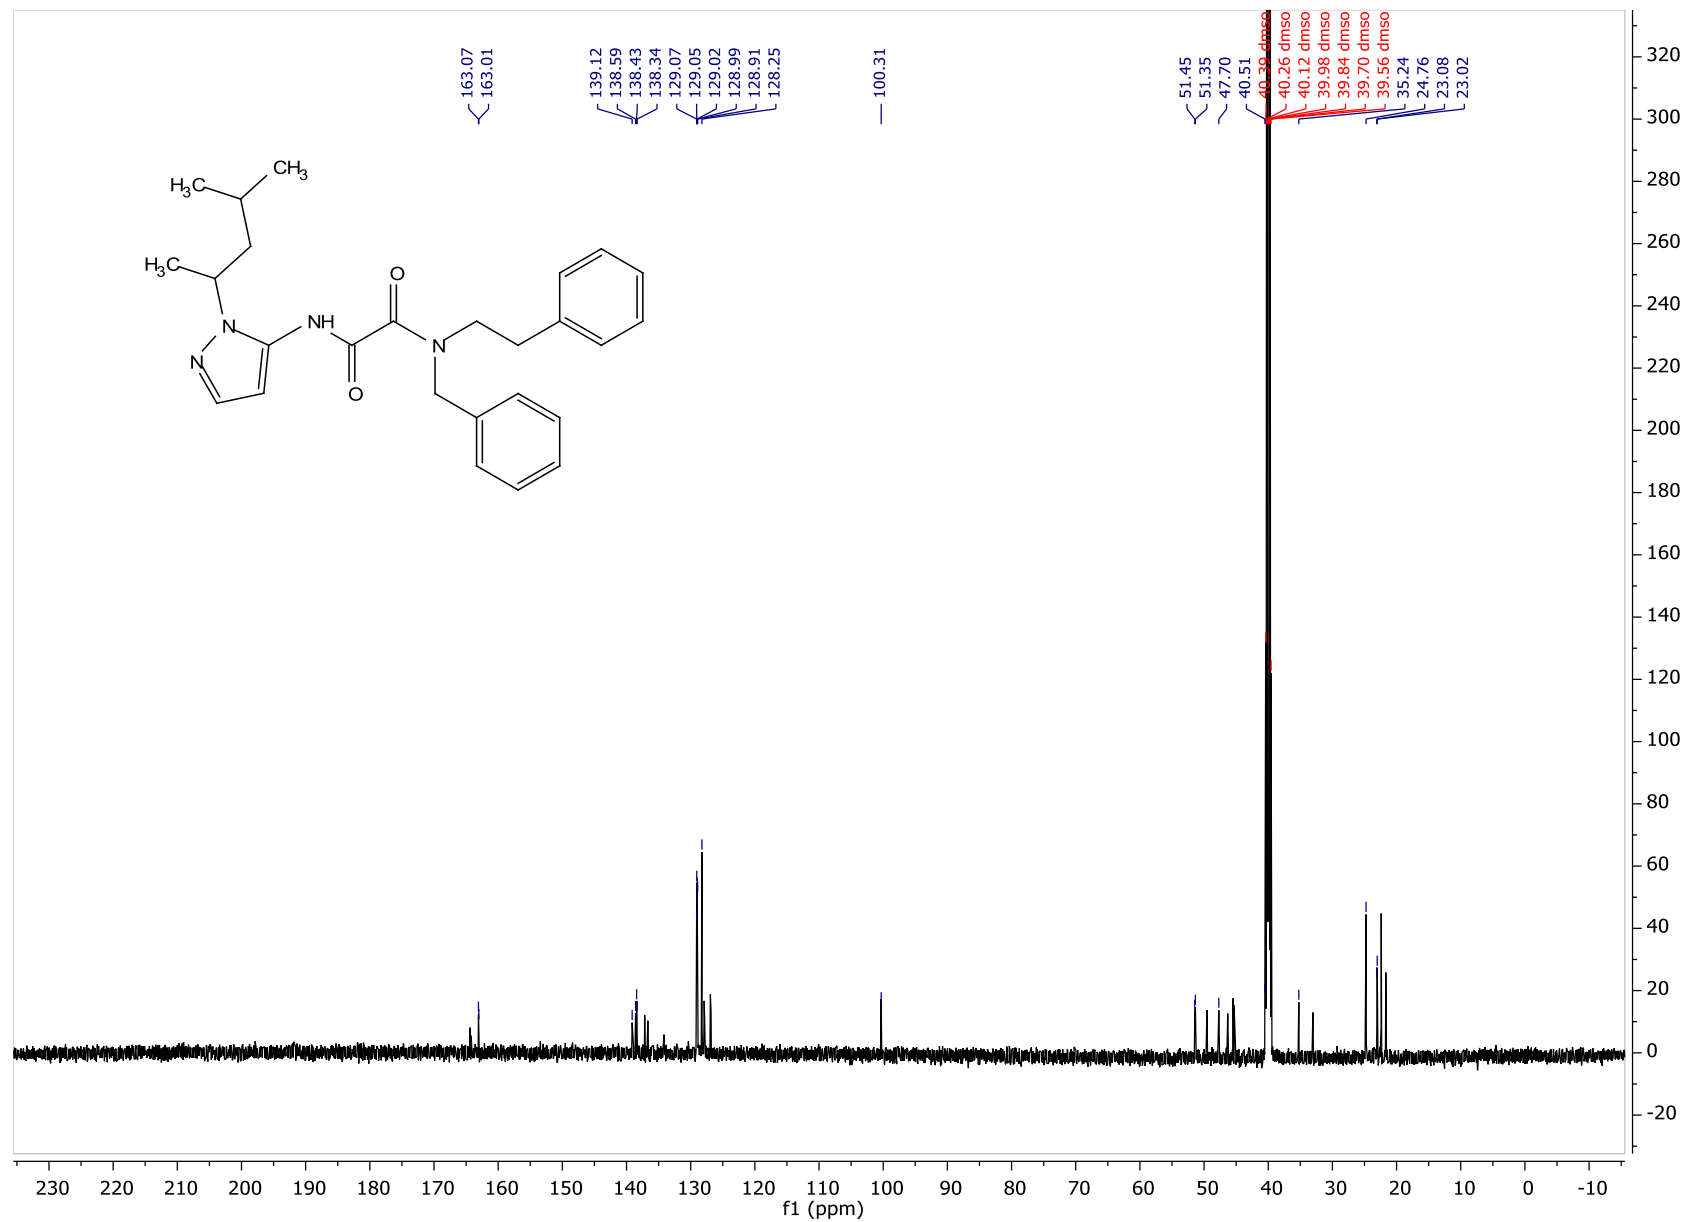

LC/MS spectrum of Z1480332192

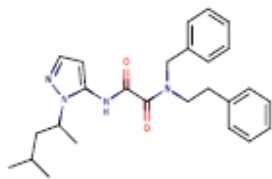

Mol Wt 432.56  
 Exact Mass 432.3

| # | Time  | Area%  |
|---|-------|--------|
| 1 | 1.431 | 100.00 |

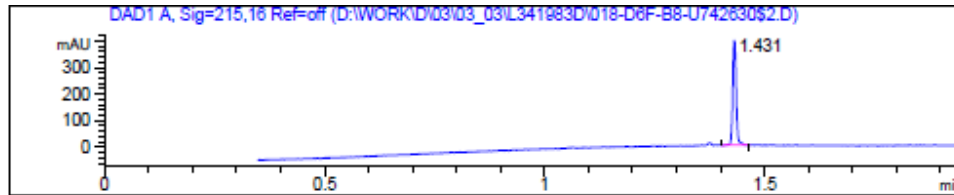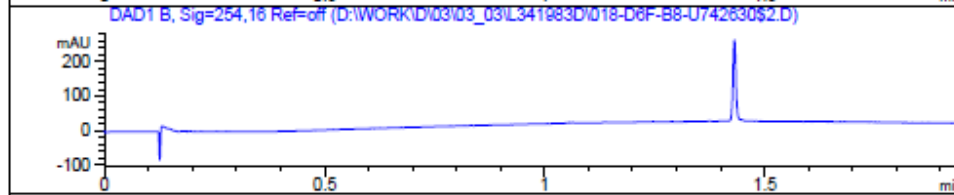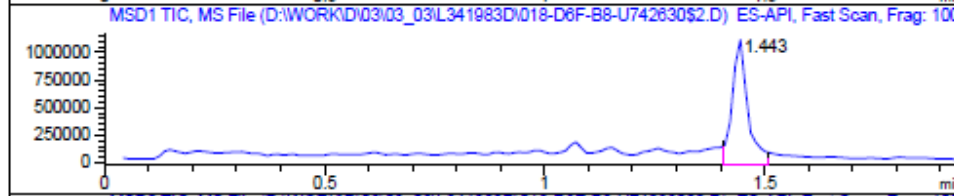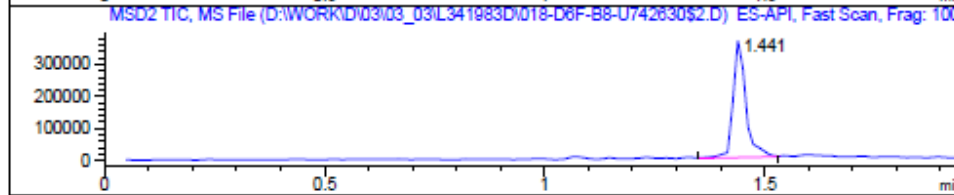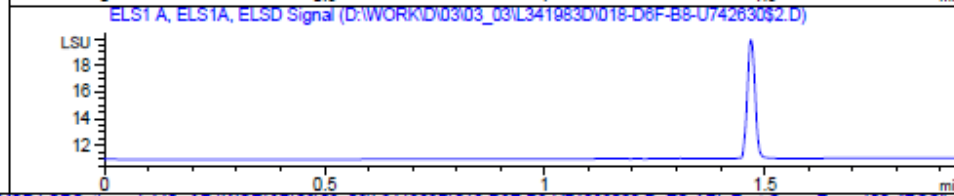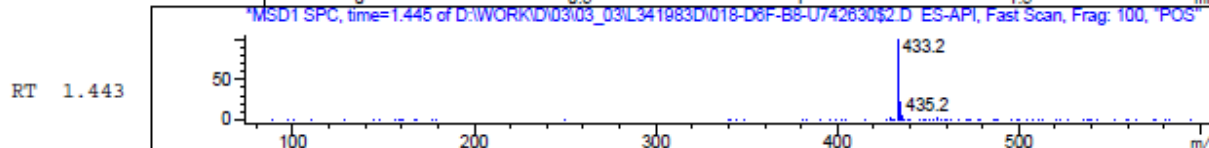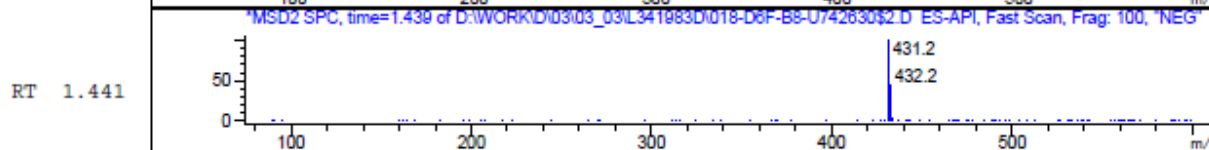

<sup>1</sup>H NMR spectrum of Z1538552259

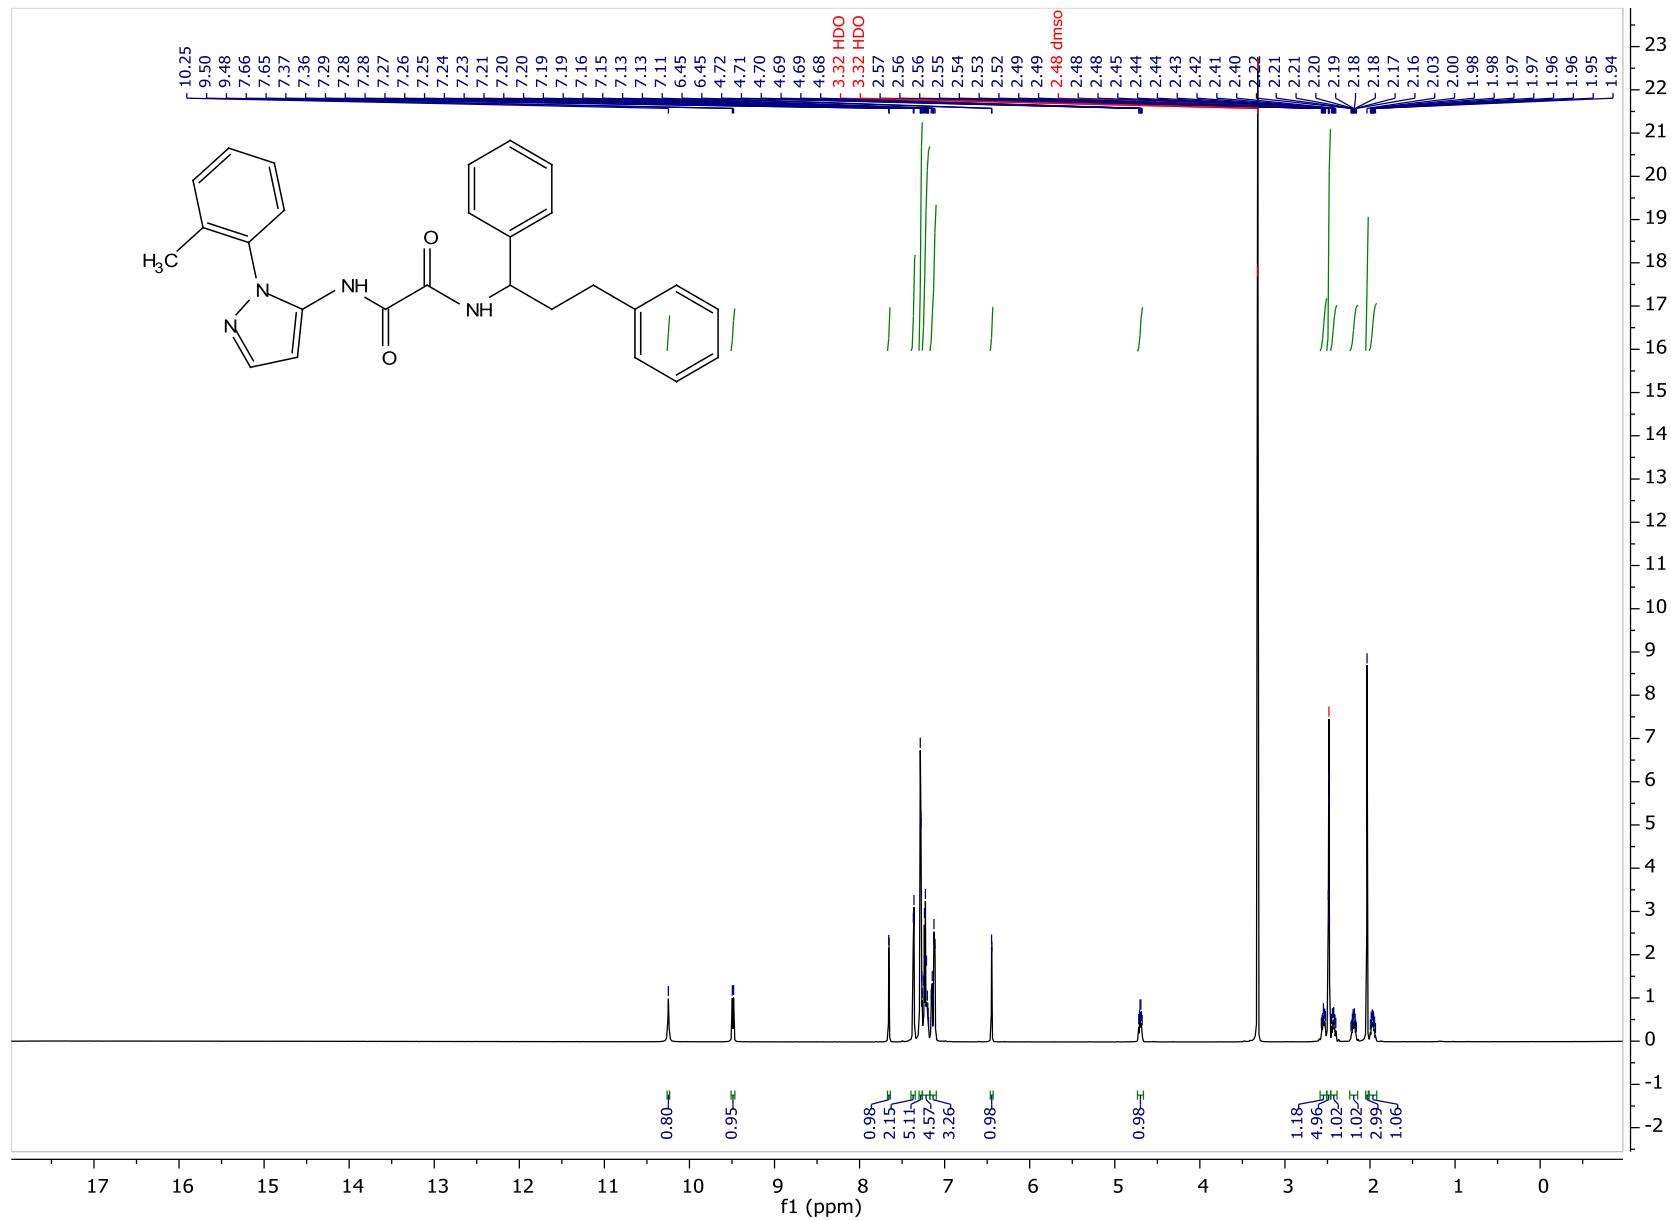

<sup>13</sup>C NMR spectrum of Z1538552259

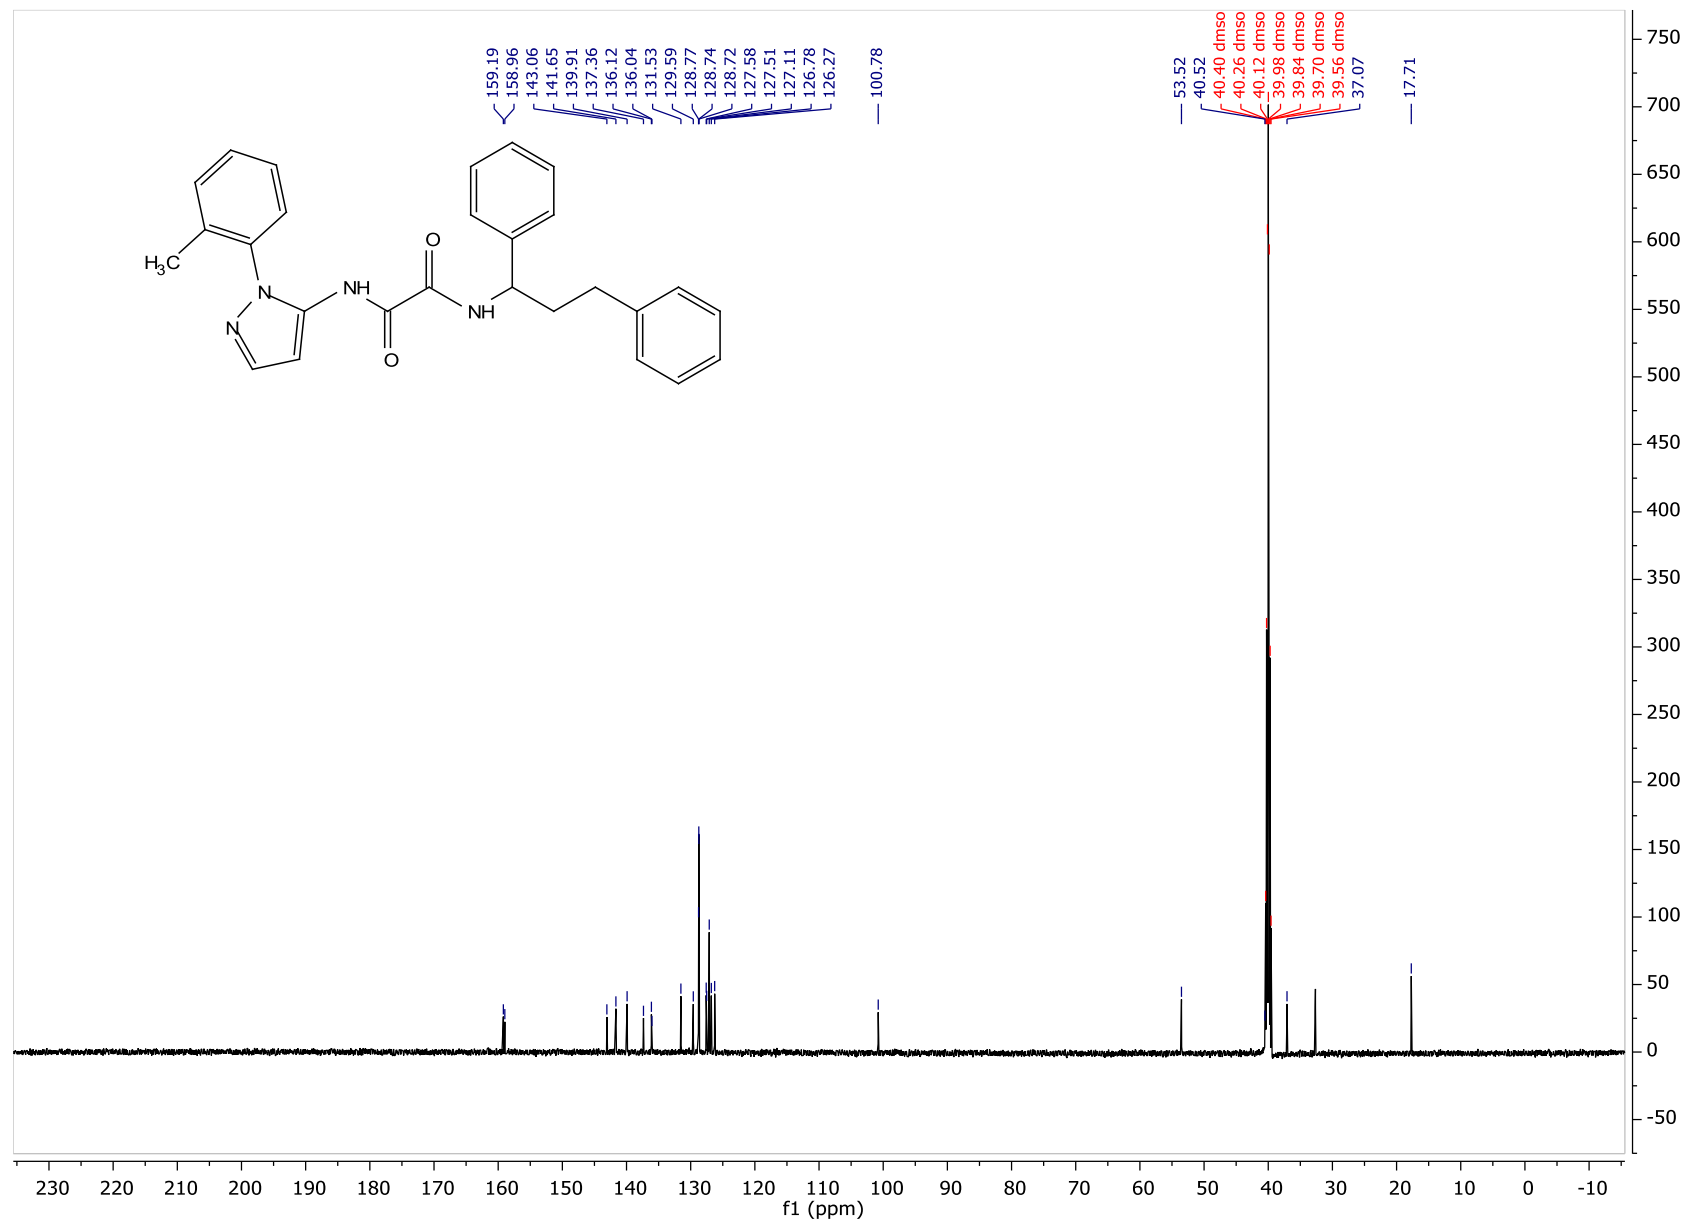



LC/MS spectrum of Z1538552259

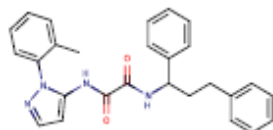

Mol Wt 438.52  
 Exact Mass 438.24  
 # Time Area%

| # | Time  | Area%  |
|---|-------|--------|
| 1 | 1.567 | 100.00 |

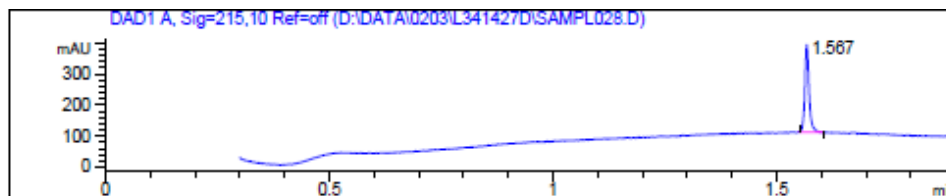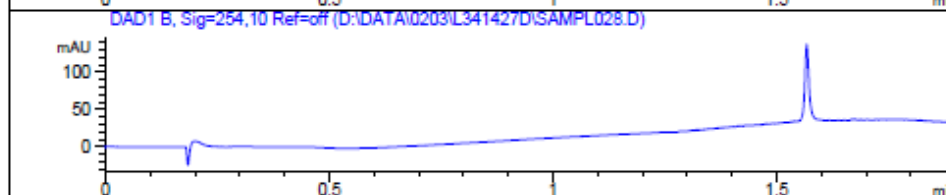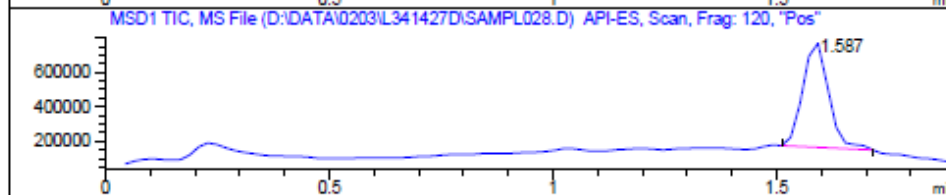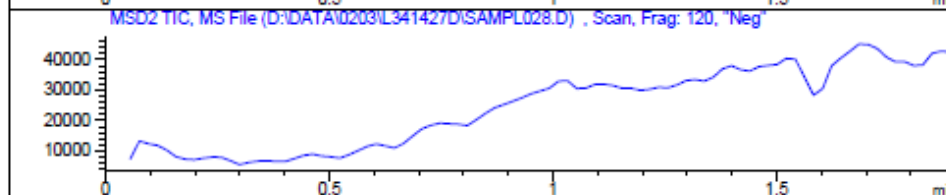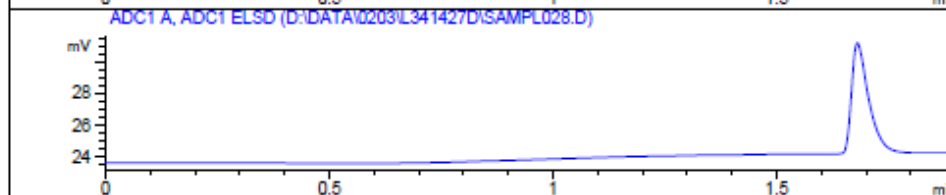

RT 1.587

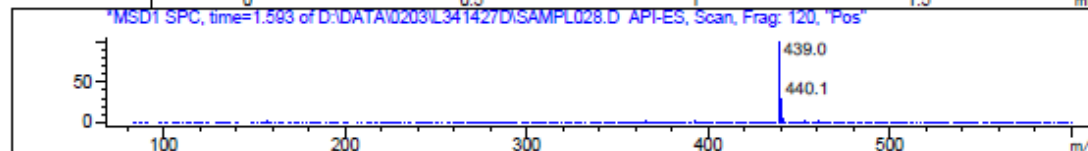

<sup>1</sup>H NMR spectrum of Z1579740596

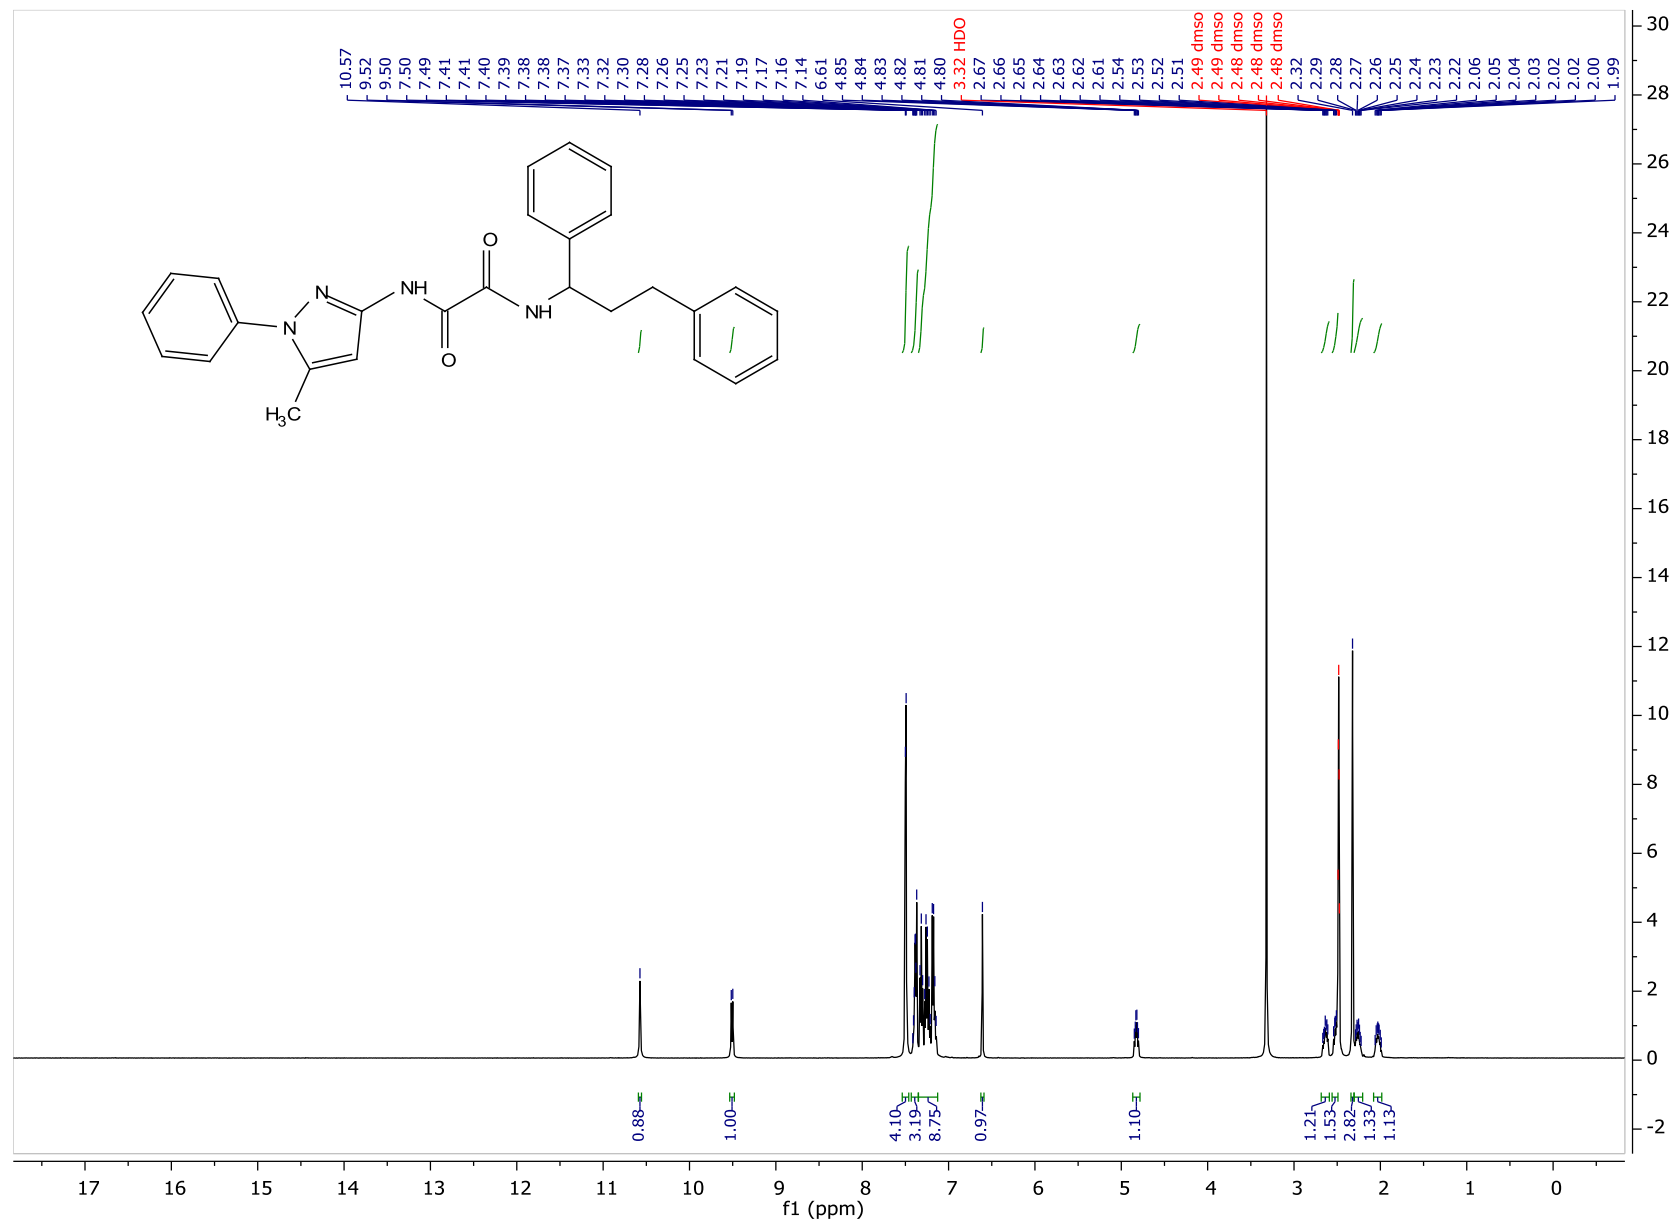

<sup>13</sup>C NMR spectrum of Z1579740596

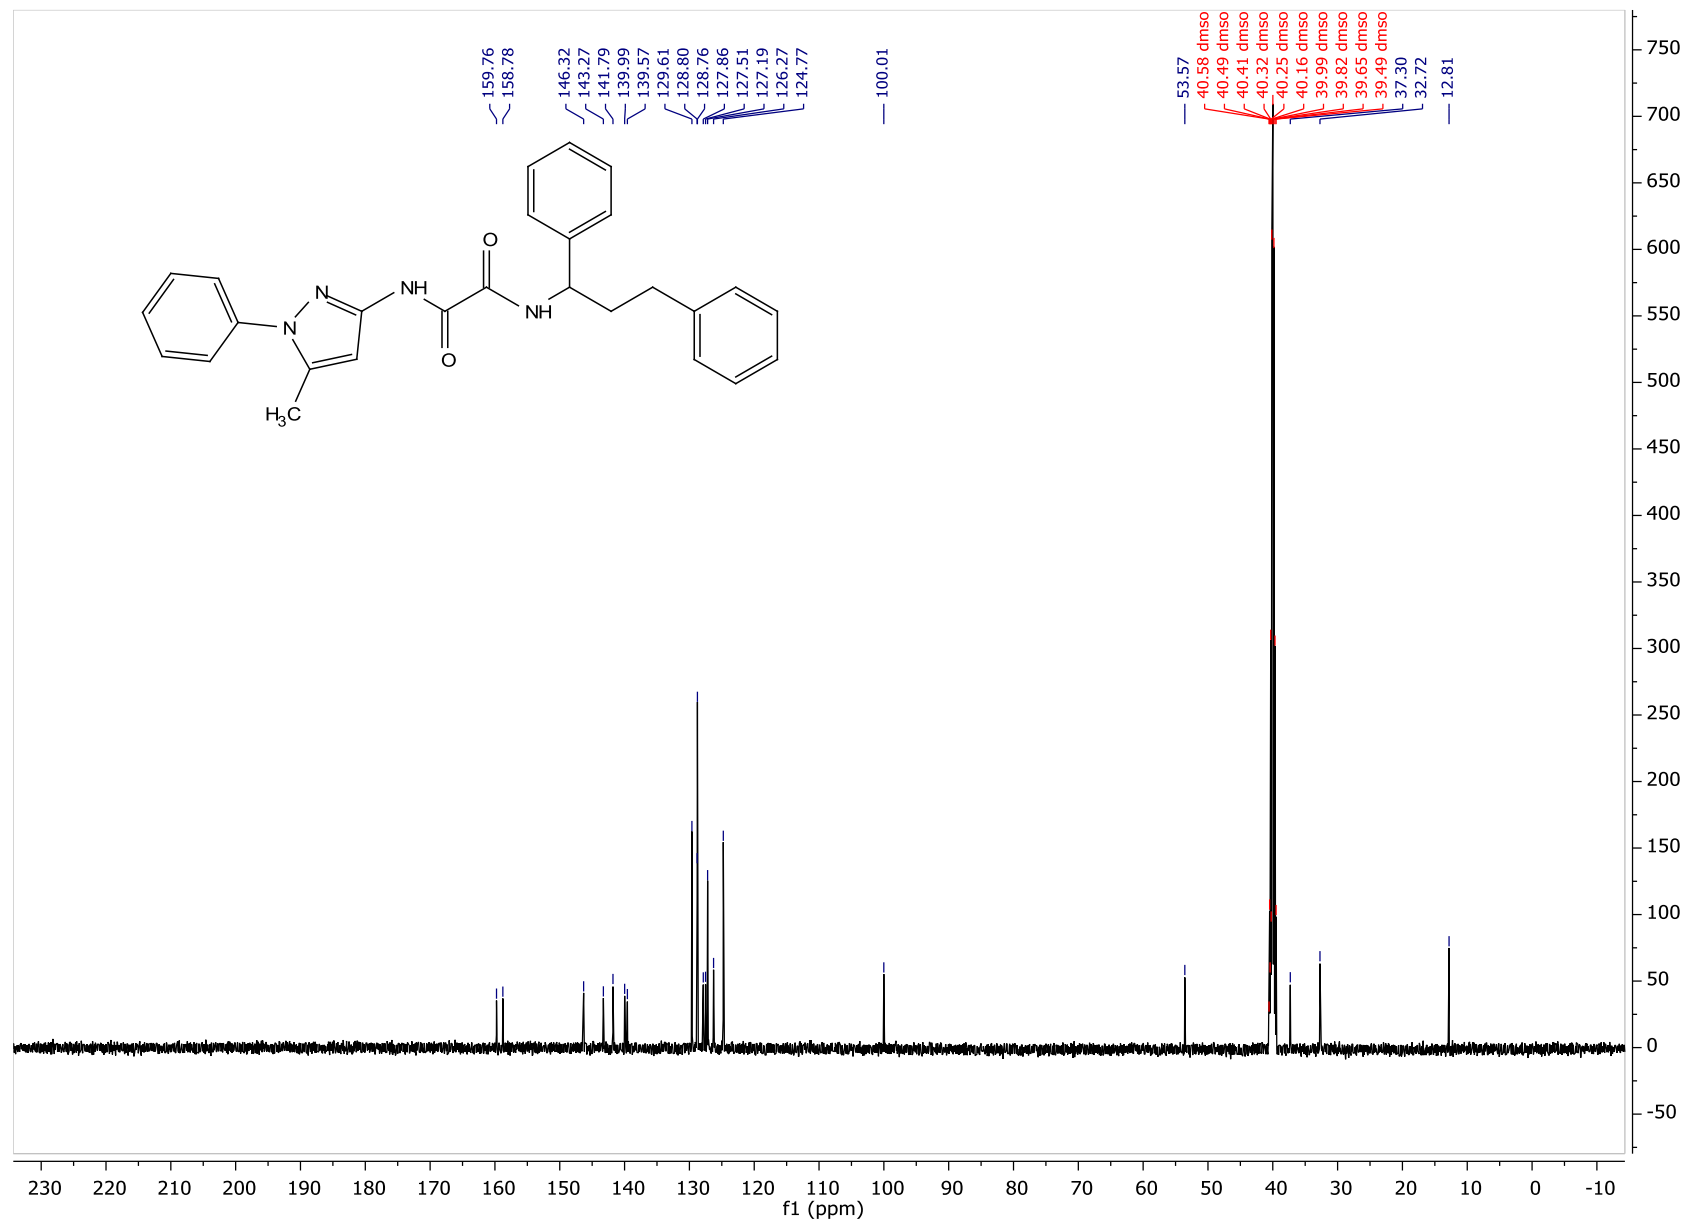

LC/MS spectrum of Z1579740596

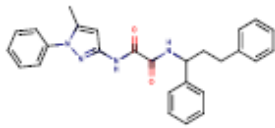

Mol Wt 438.52  
Exact Mass 438.24  
# Time Area%

| # | Time  | Area%  |
|---|-------|--------|
| 1 | 1.601 | 100.00 |

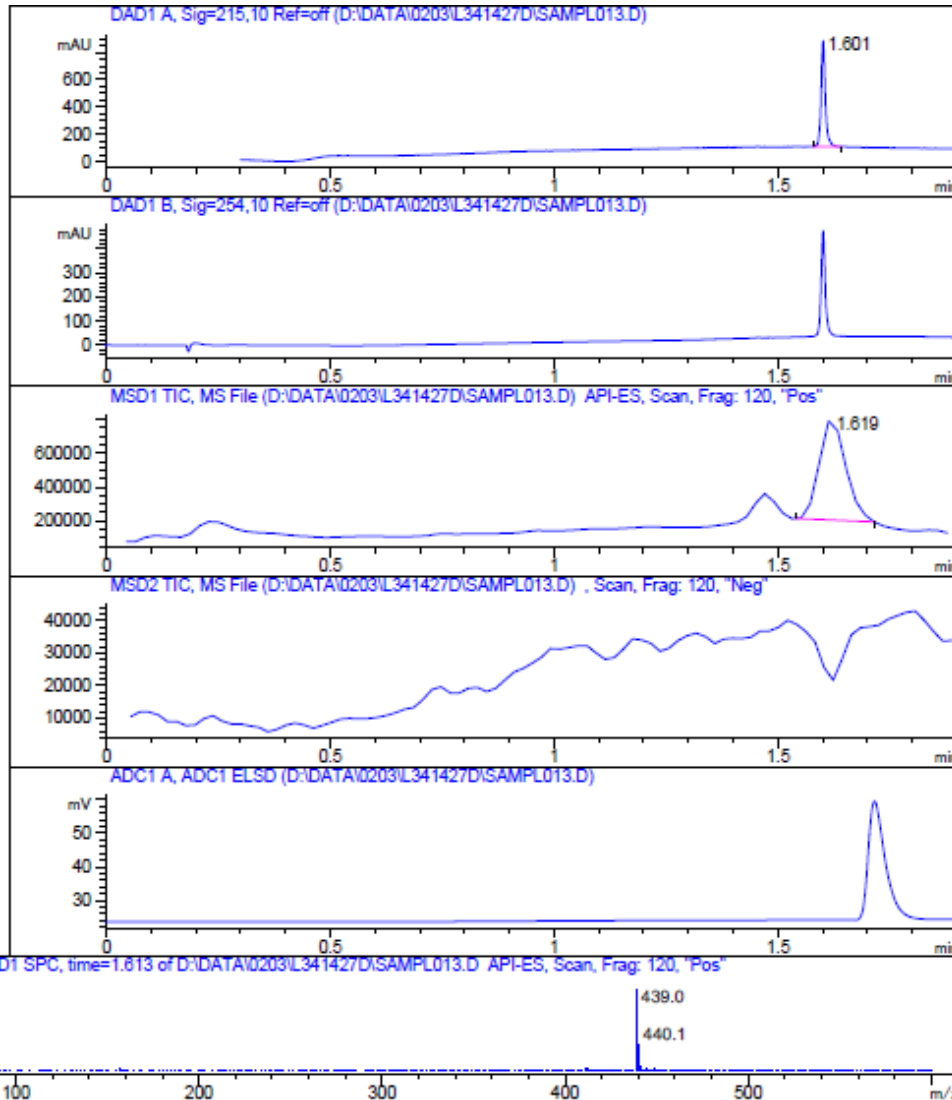

RT 1.619

<sup>1</sup>H NMR spectrum of Z1783021934

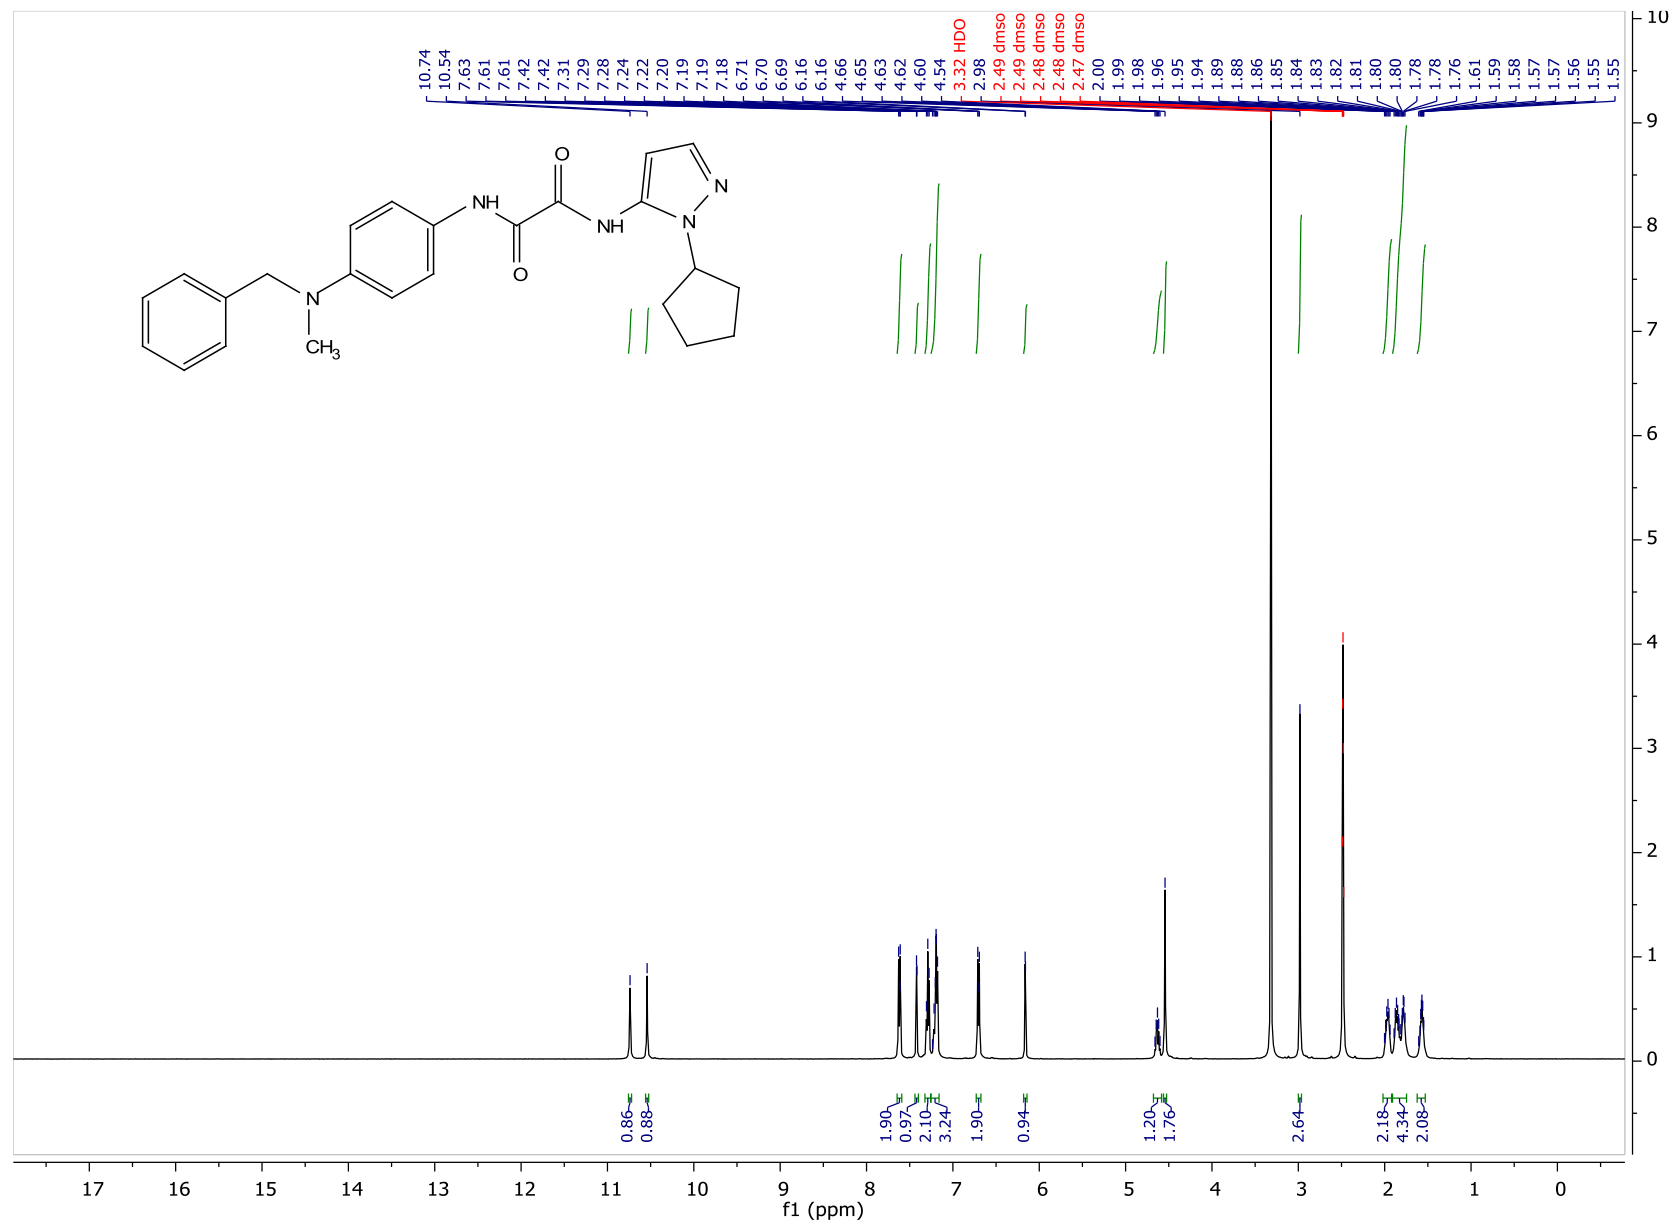

<sup>13</sup>C NMR spectrum of Z1783021934

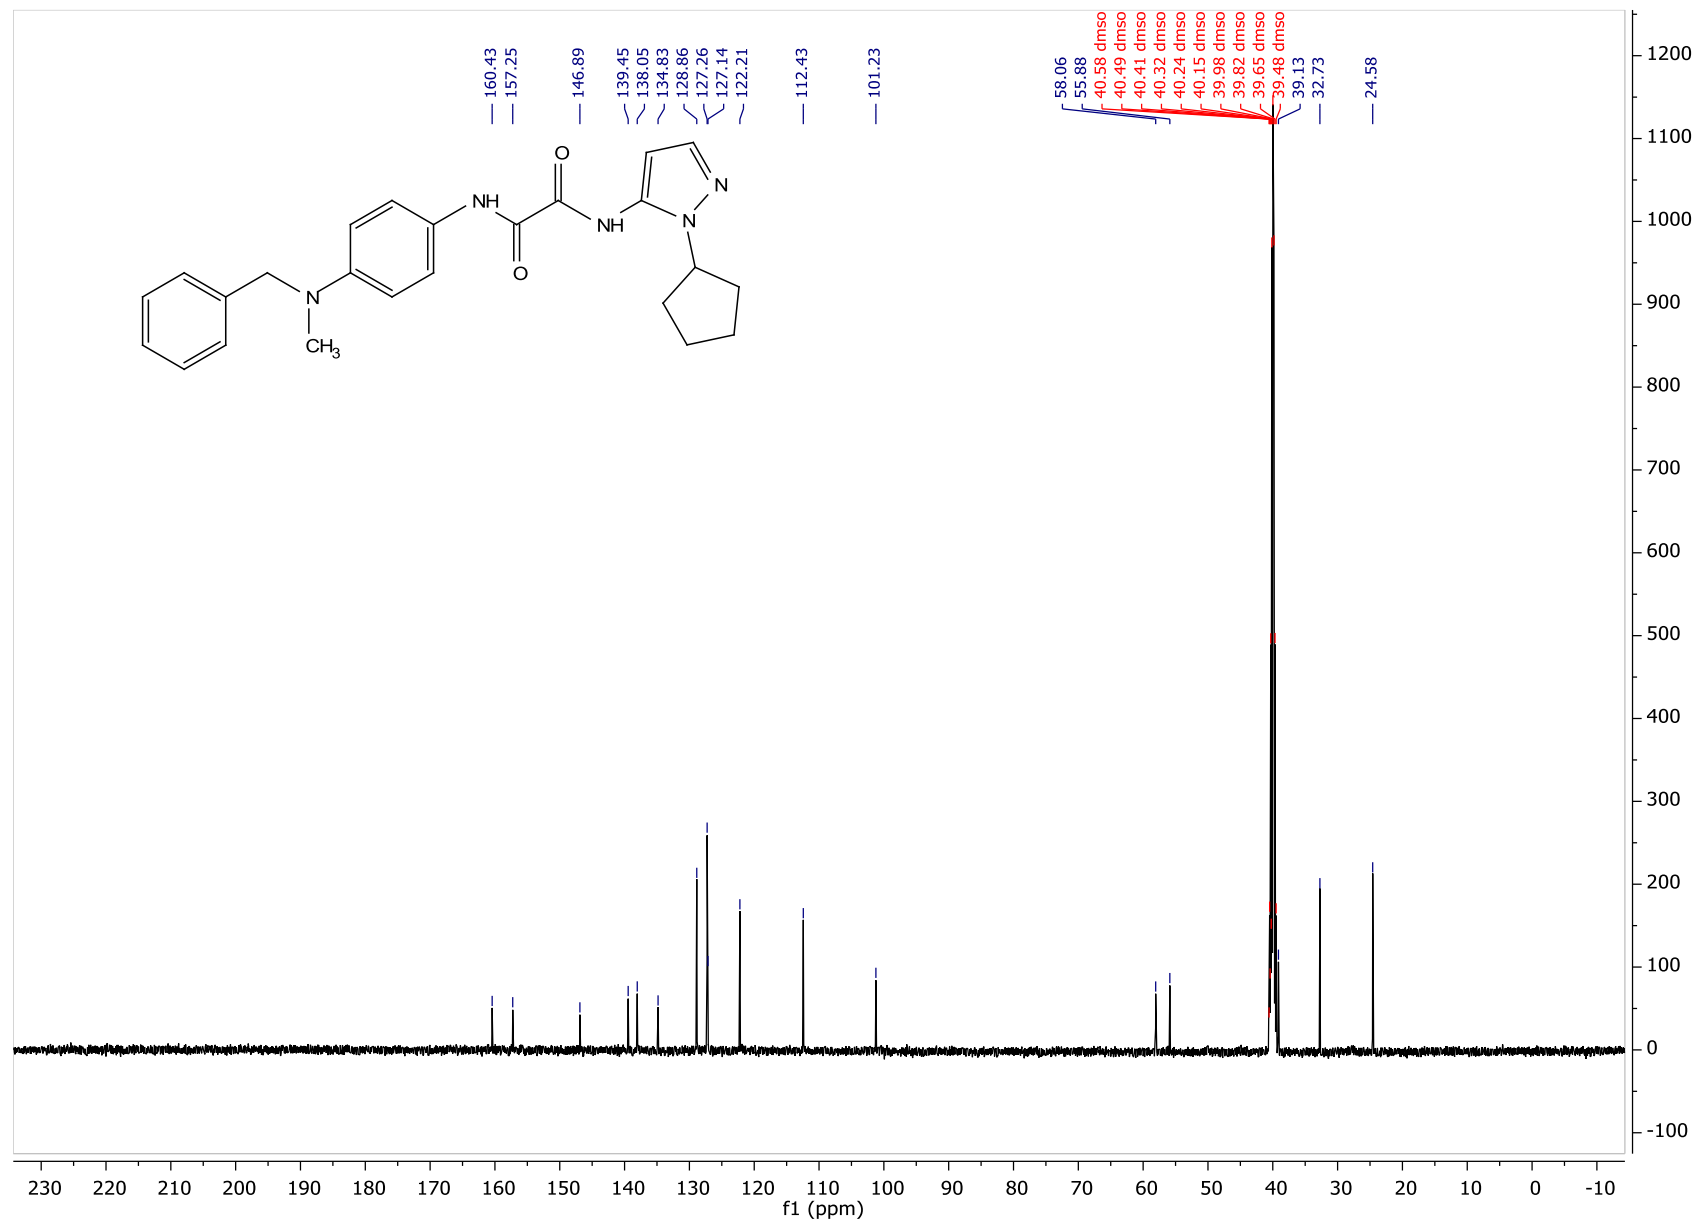

LC/MS spectrum of Z1783021934

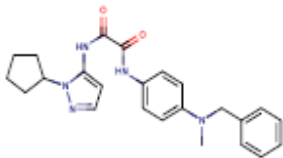

Mol Wt 417.5  
Exact Mass 417.25

| # | Time  | Area%  |
|---|-------|--------|
| 1 | 1.356 | 100.00 |

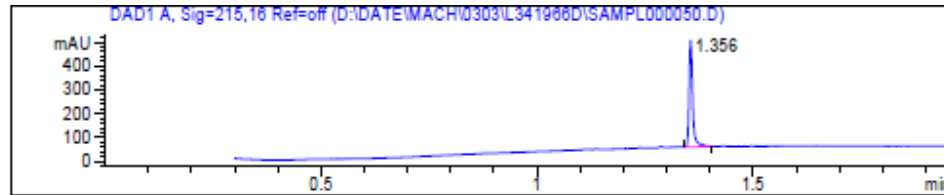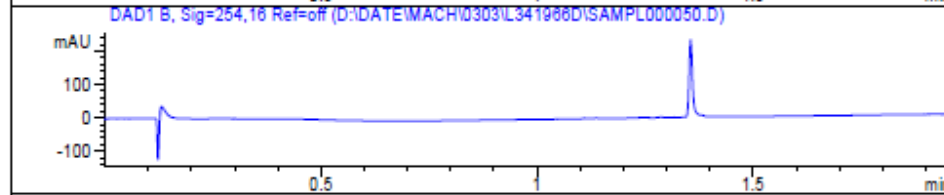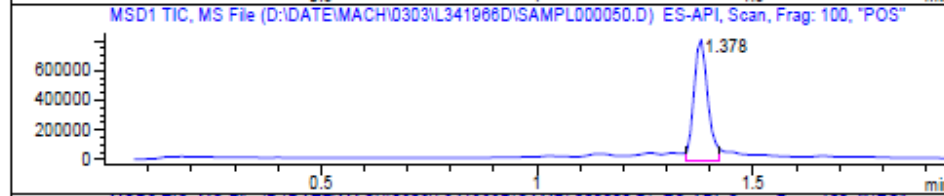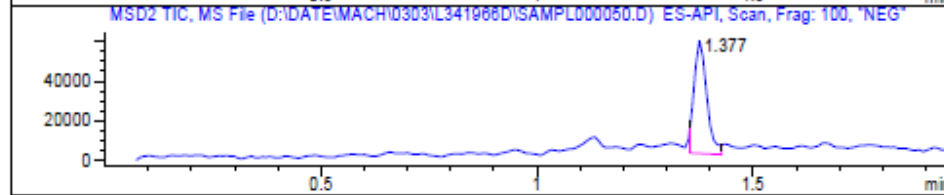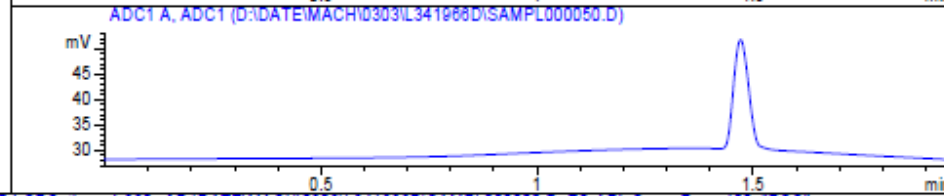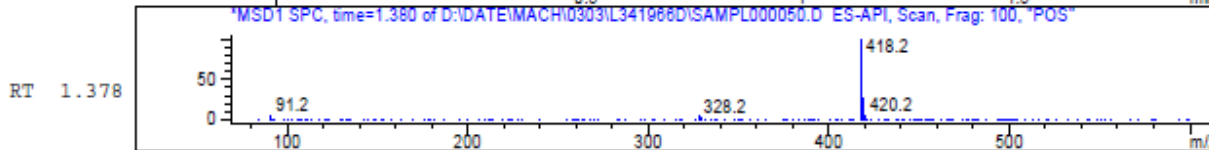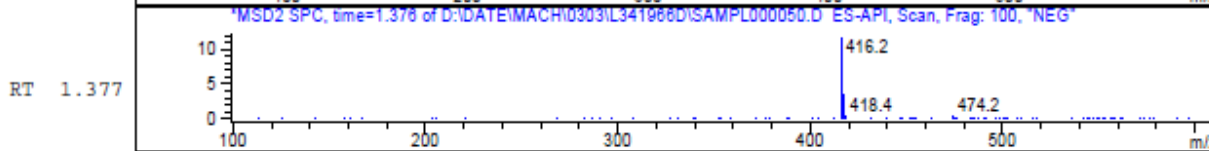

<sup>1</sup>H NMR spectrum of Z1893268738

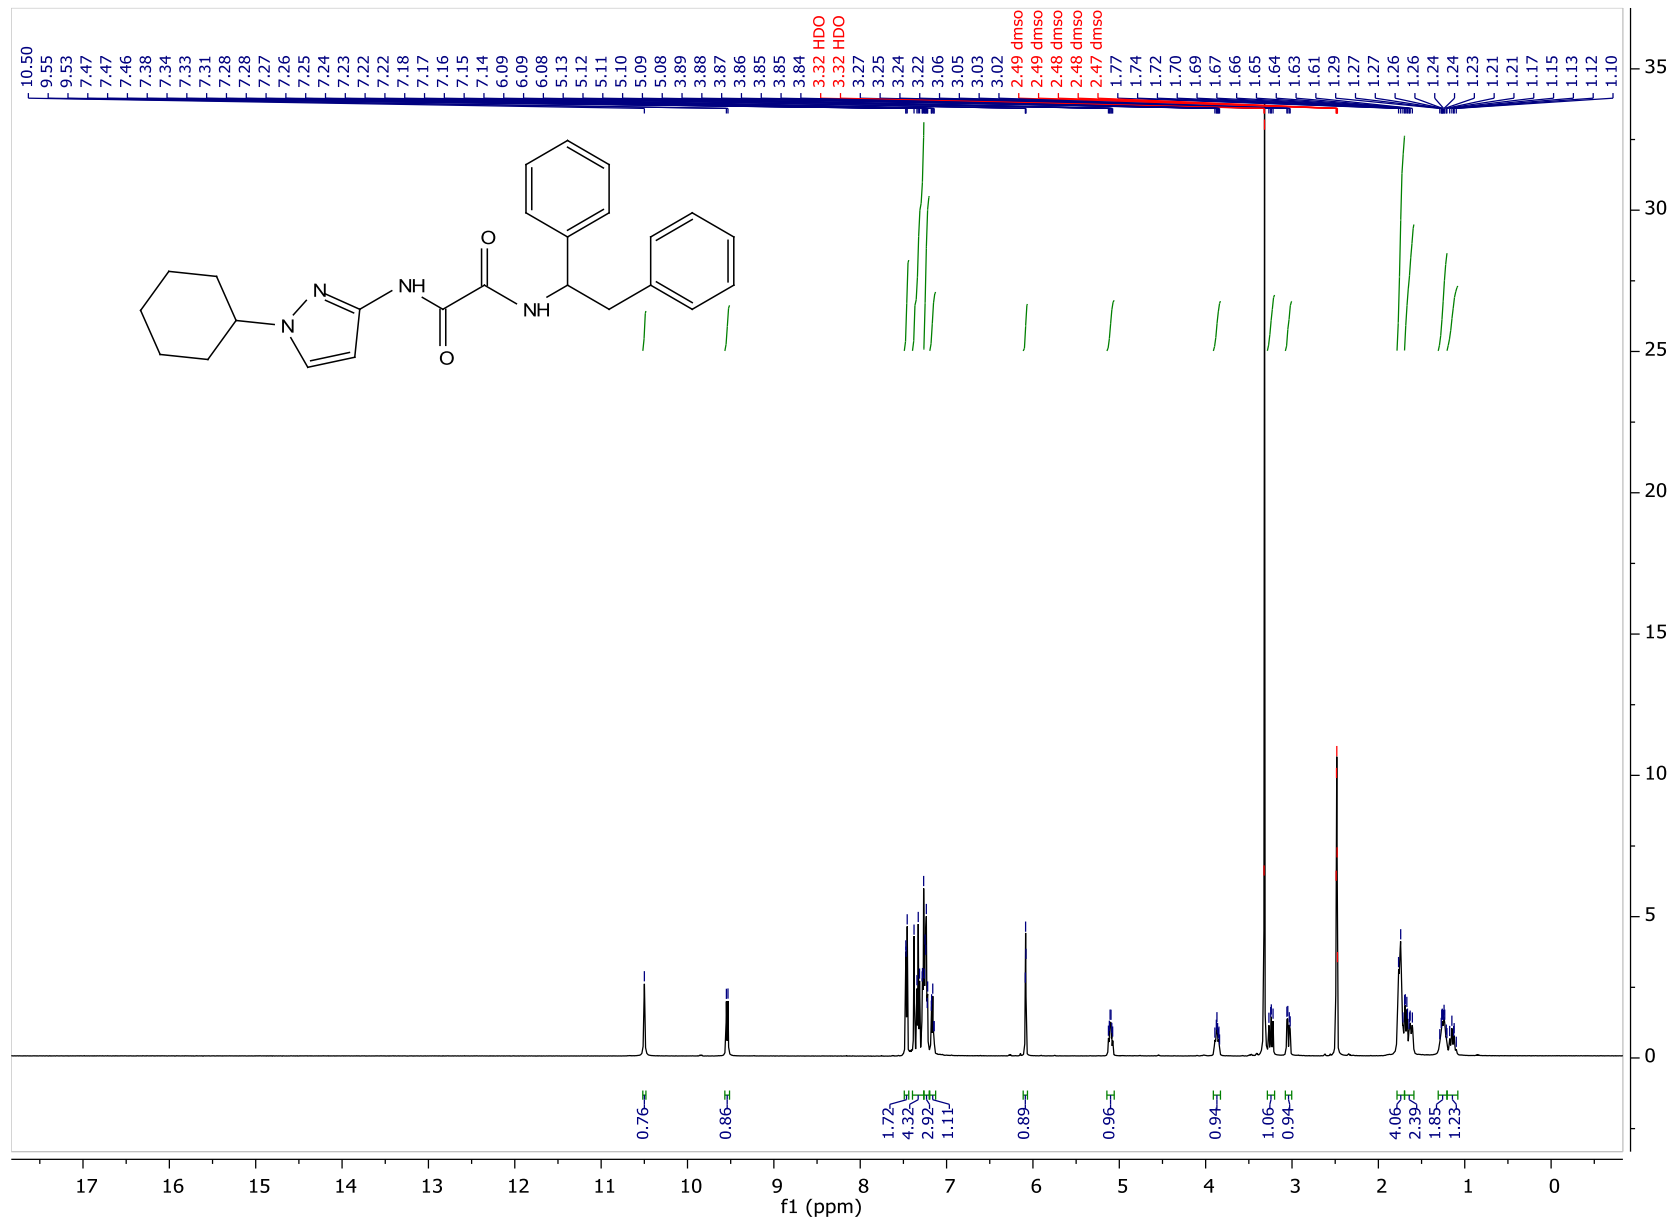



<sup>13</sup>C NMR spectrum of Z1893268738

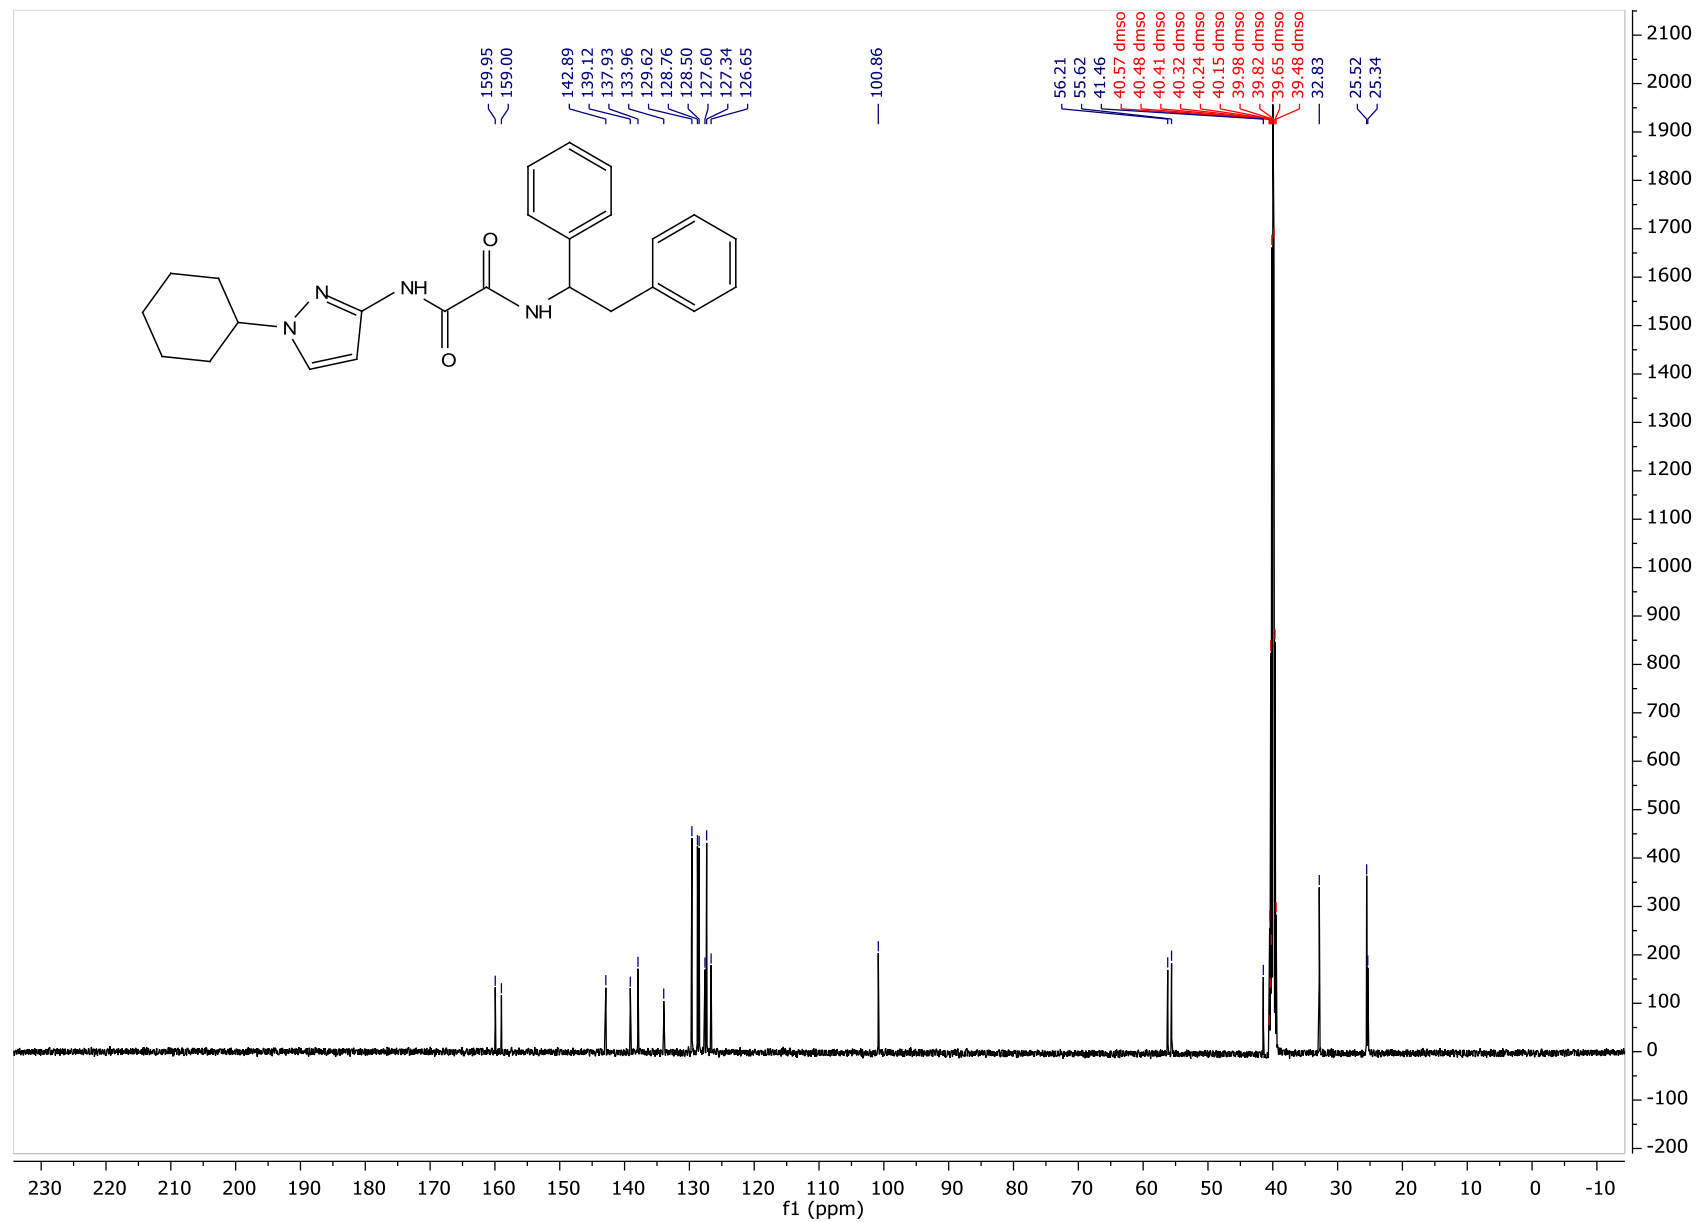

LC/MS spectrum of Z1893268738

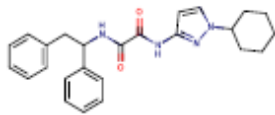

Mol Wt 416.52  
 Exact Mass 416.26  
 # Time Area%

| # | Time  | Area%  |
|---|-------|--------|
| 1 | 1.523 | 100.00 |

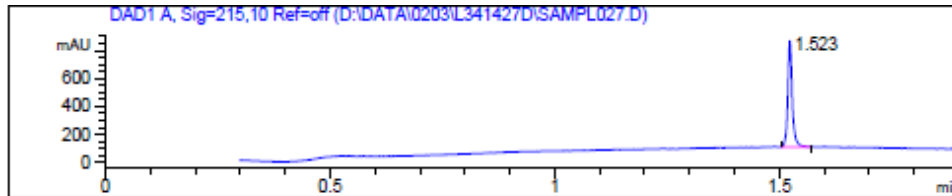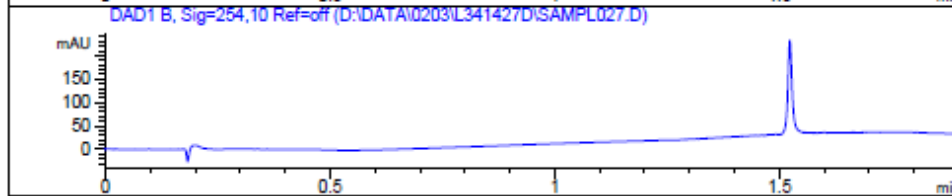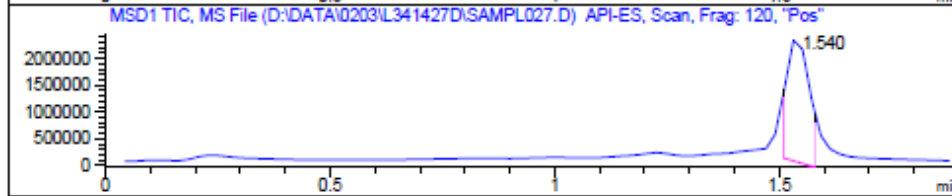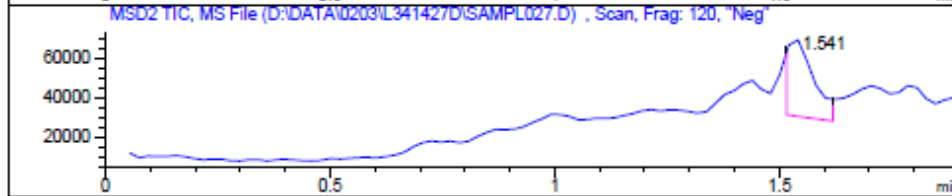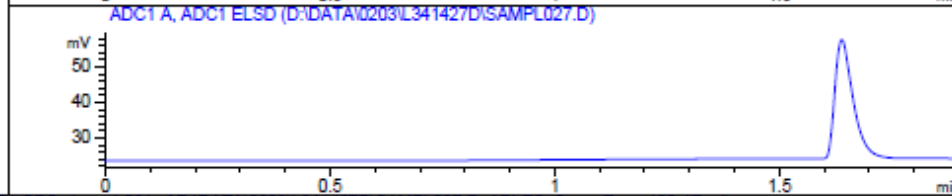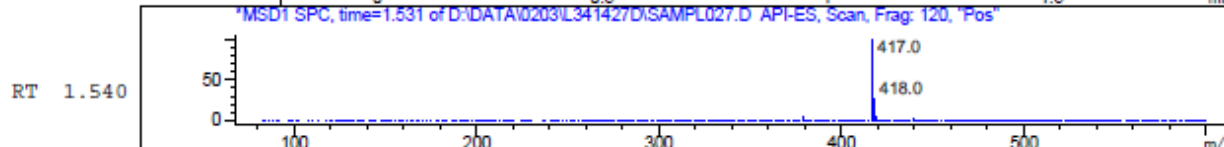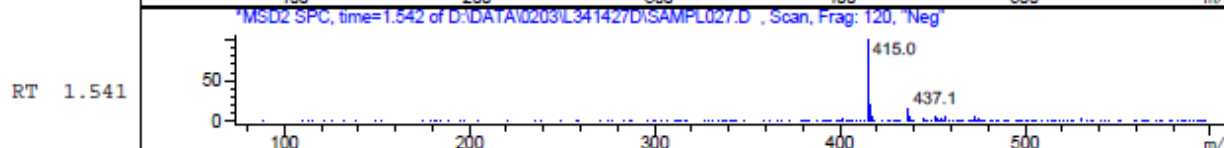

<sup>1</sup>H NMR spectrum of Z1893379869

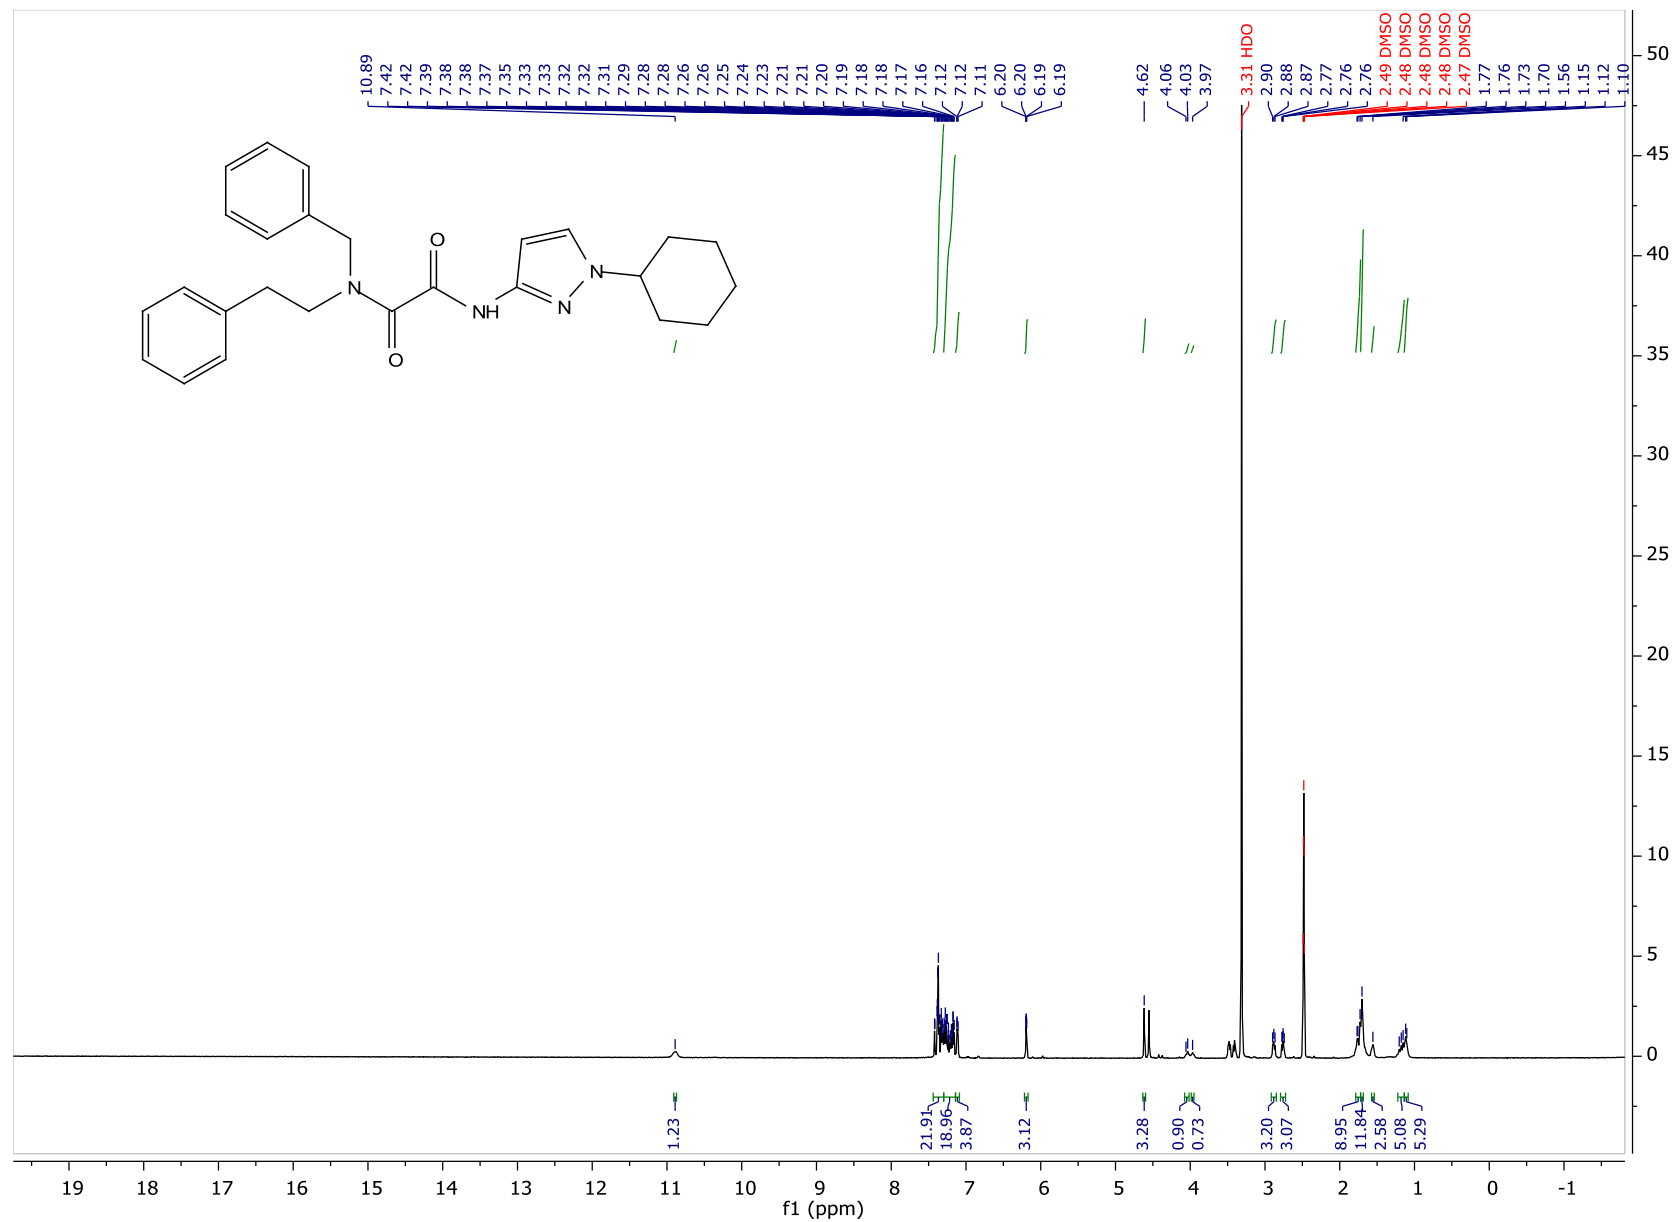

<sup>13</sup>C NMR spectrum of Z1893379869

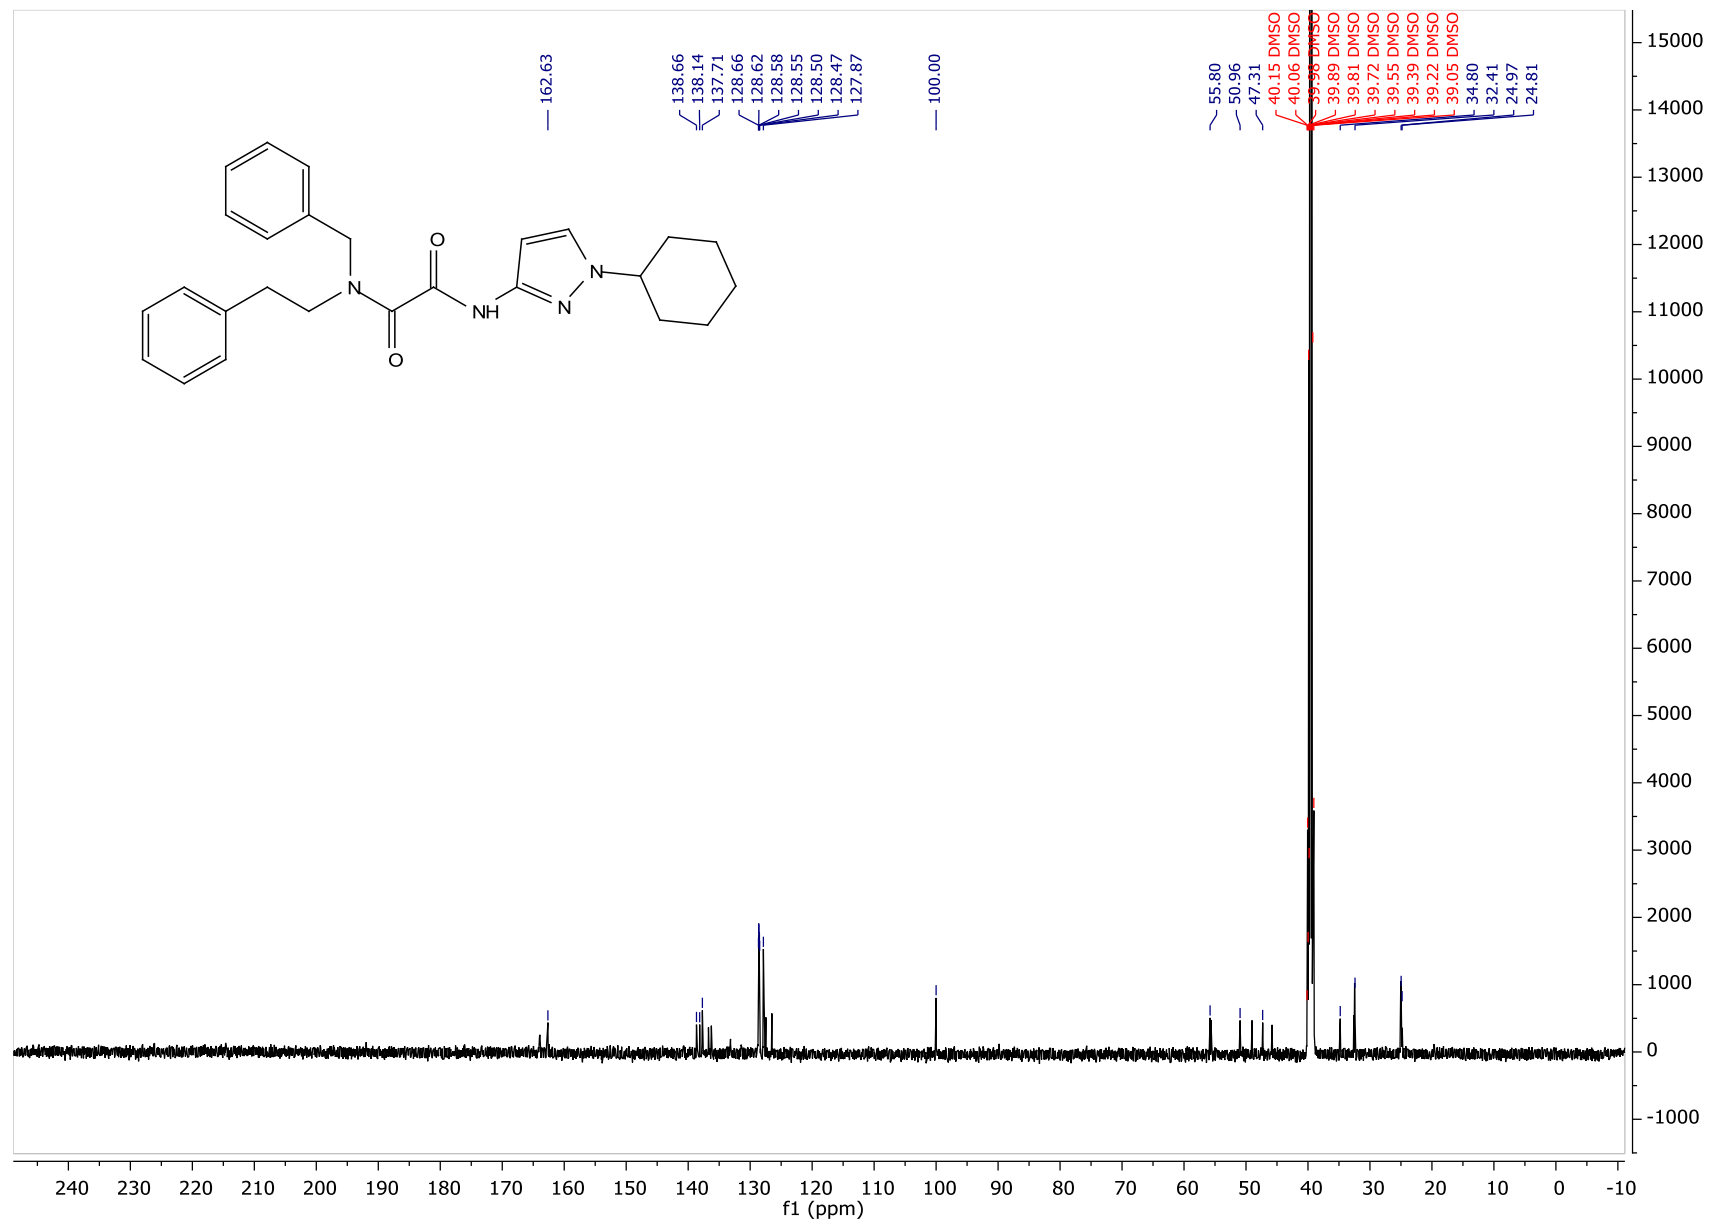

LC/MS spectrum of Z1893379869

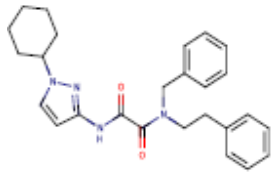

Mol Wt 430.54  
 Exact Mass 430.28

| # | Time  | Area%  |
|---|-------|--------|
| 1 | 1.571 | 100.00 |

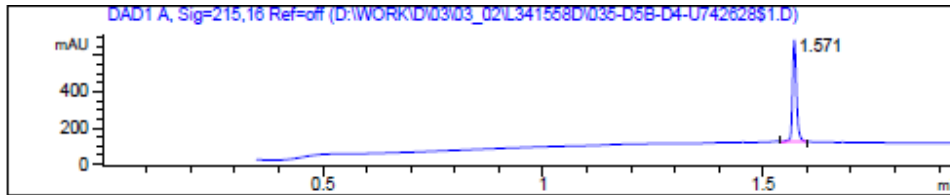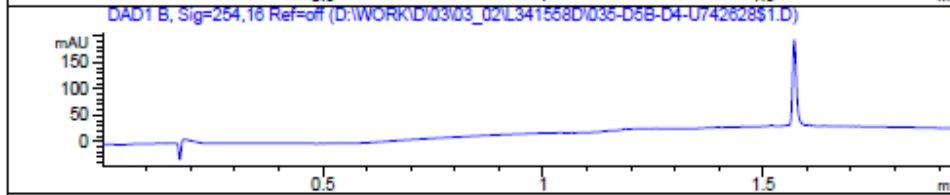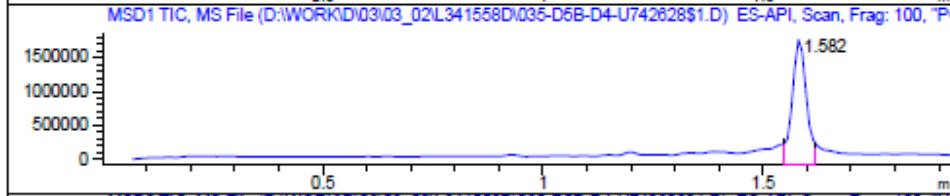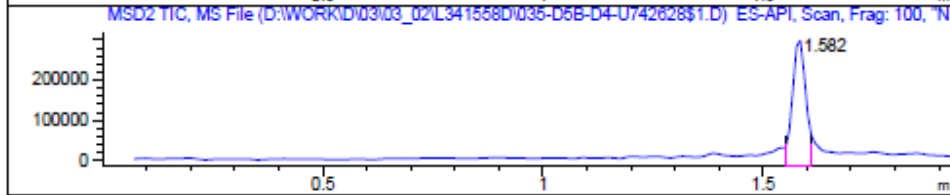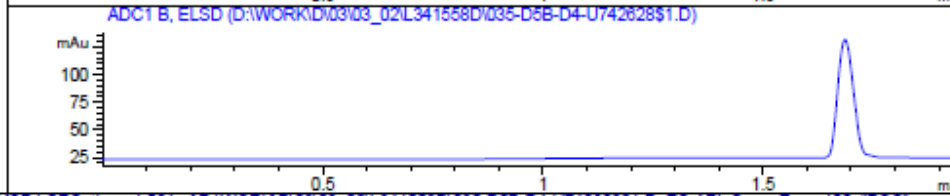

RT 1.582

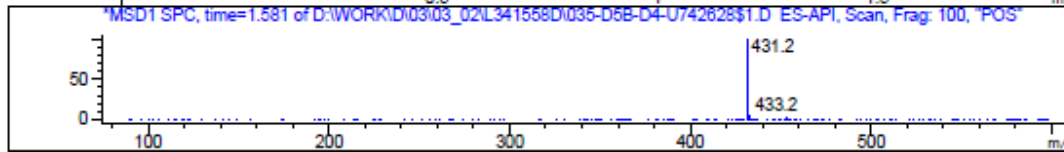

RT 1.582

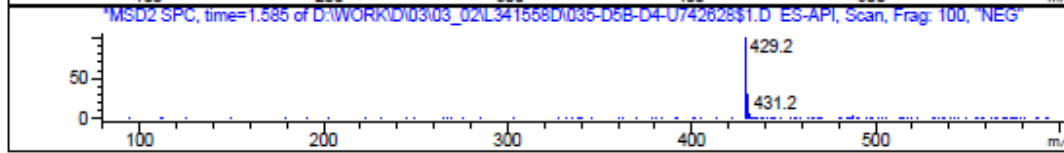

<sup>1</sup>H NMR spectrum of Z1893499762

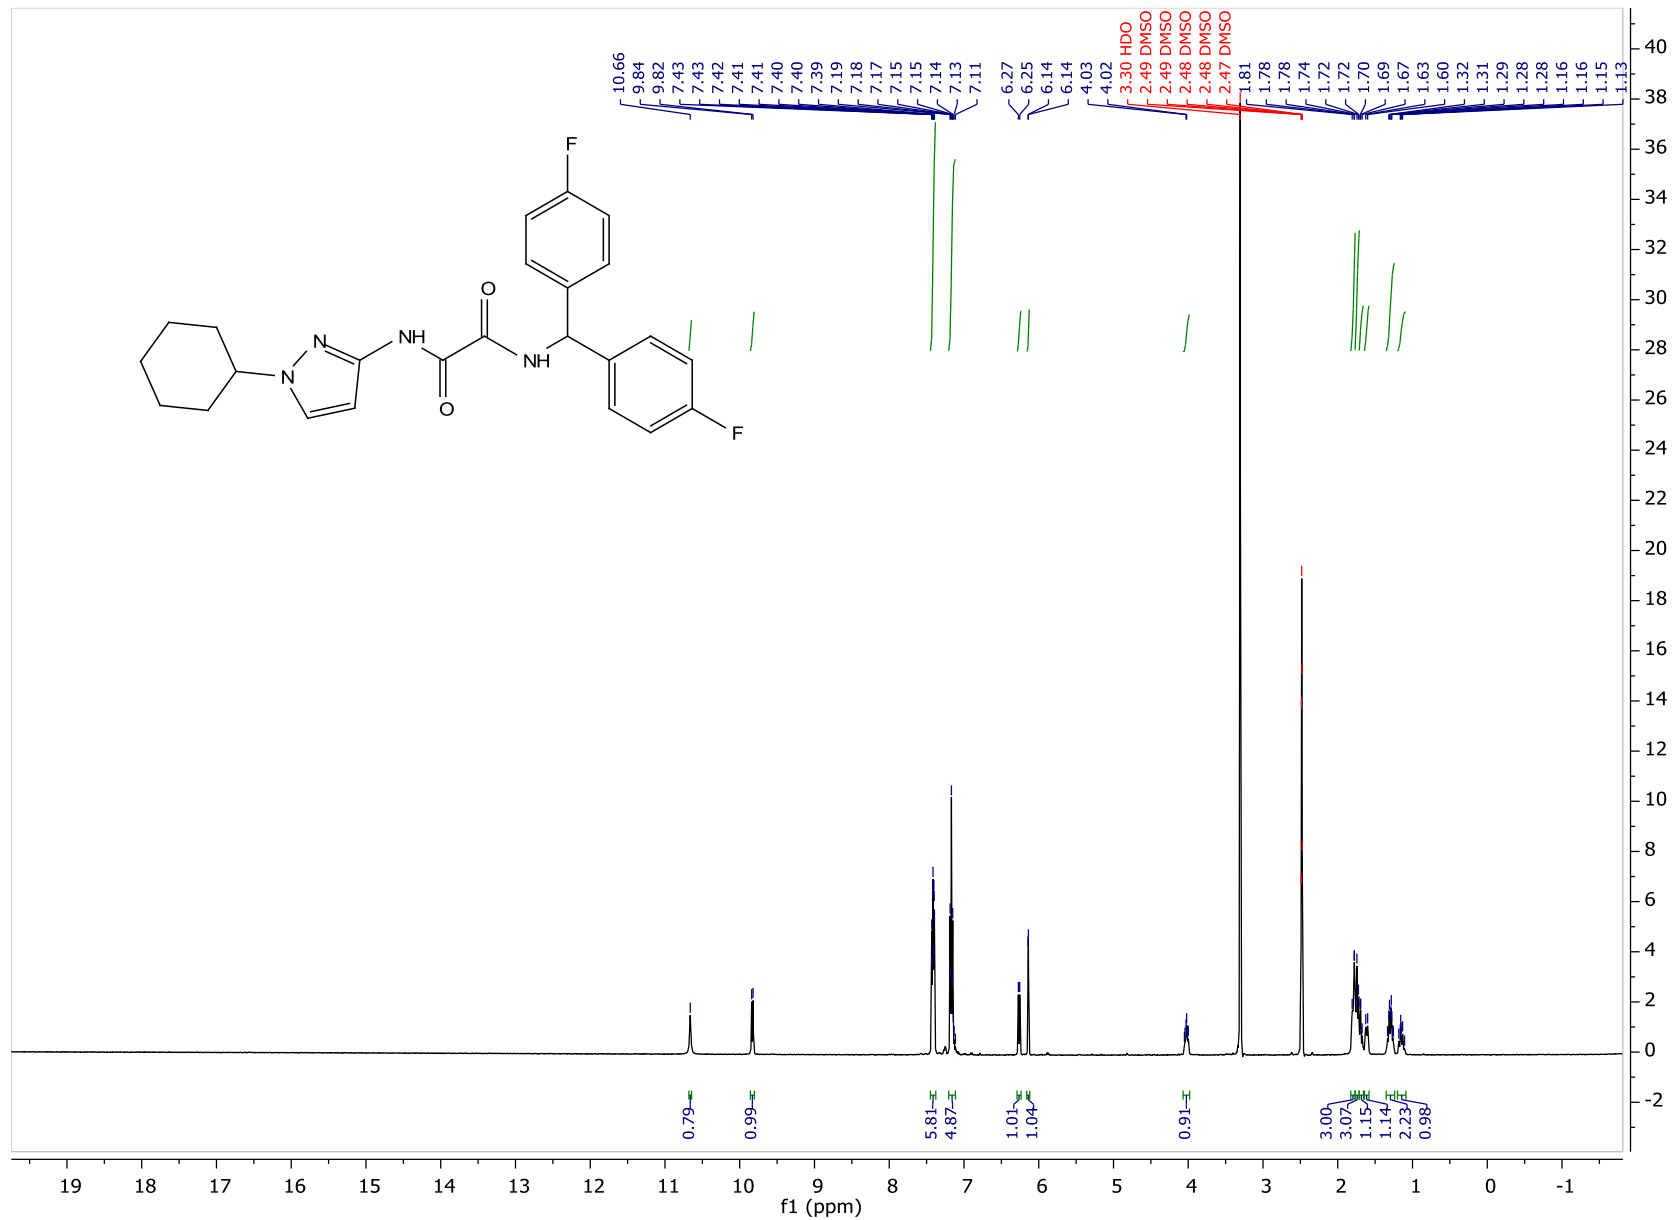

<sup>13</sup>C NMR spectrum of Z1893499762

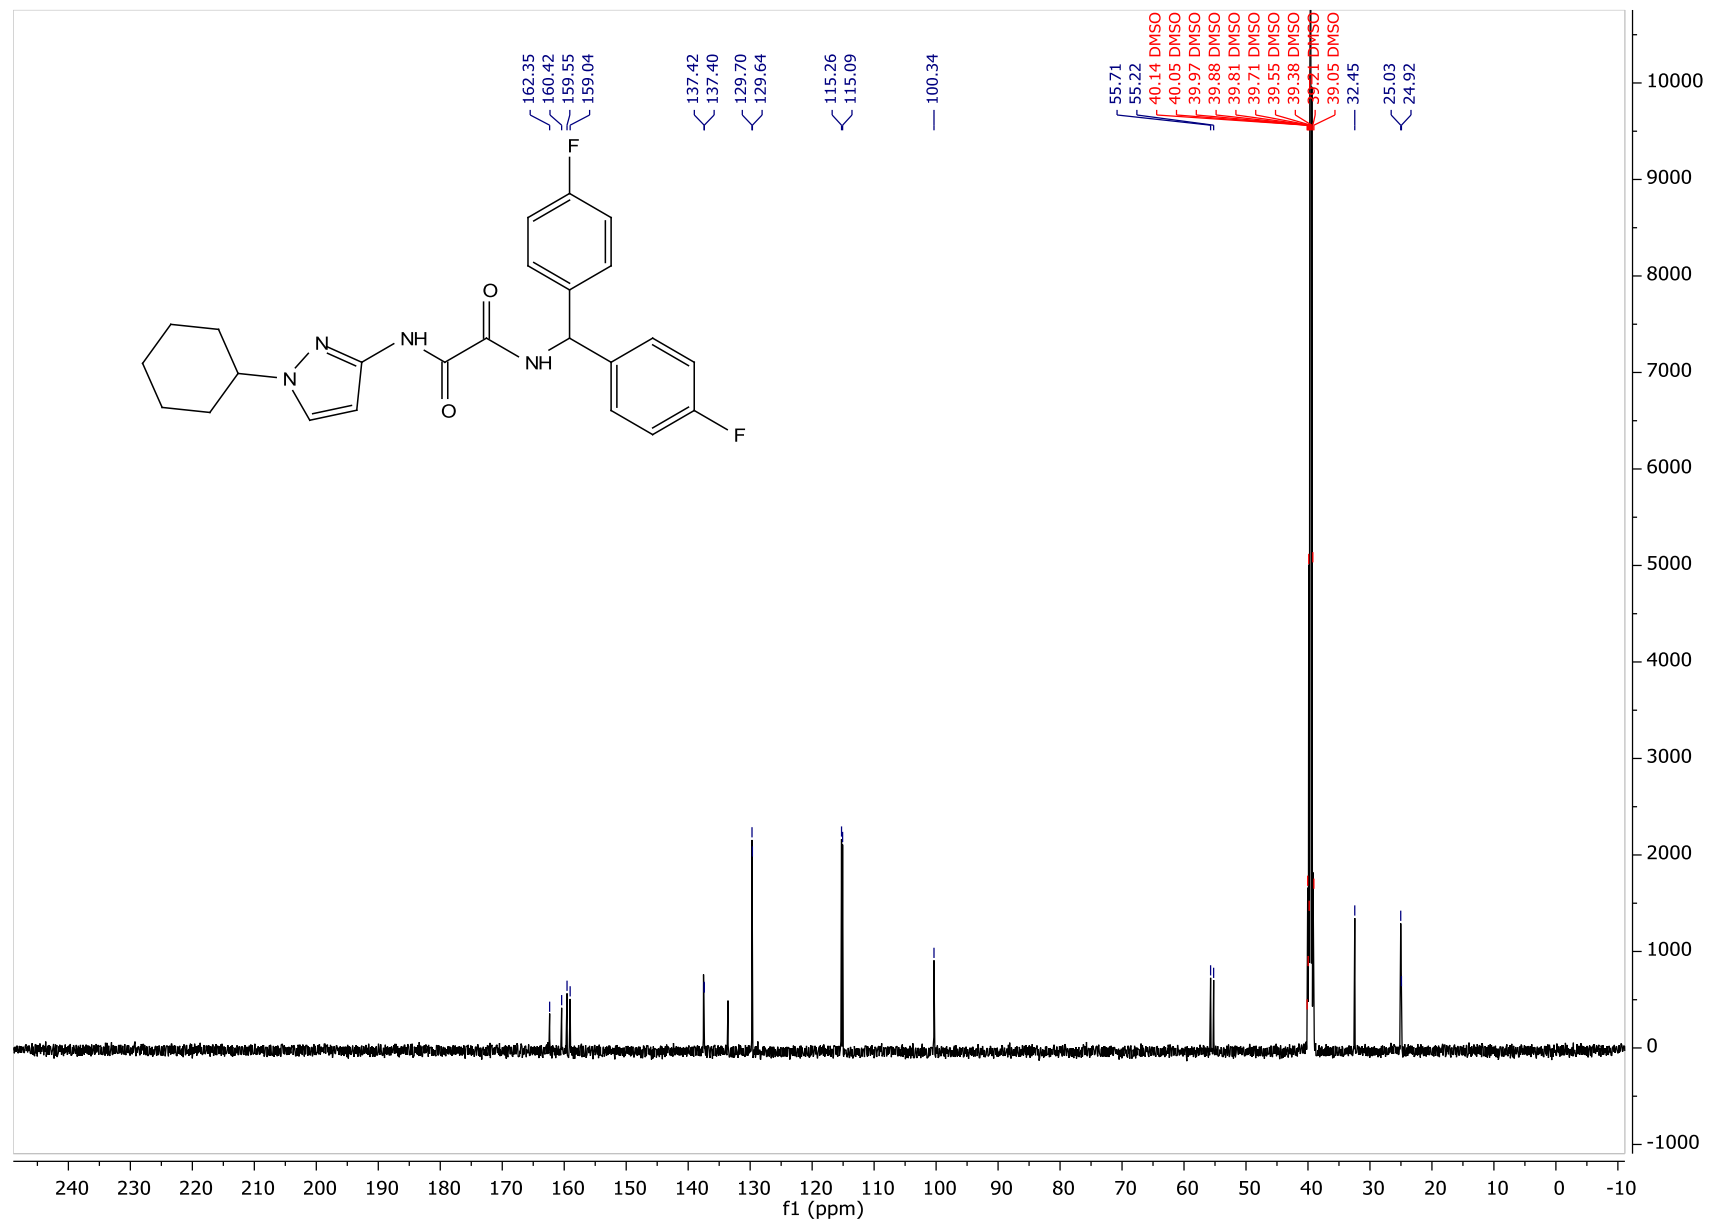

LC/MS spectrum of Z1893499762

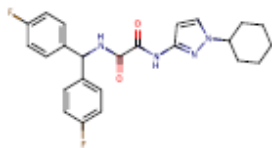

Mol Wt 438.47  
 Exact Mass 438.22

| # | Time  | Area%  |
|---|-------|--------|
| 1 | 1.513 | 100.00 |

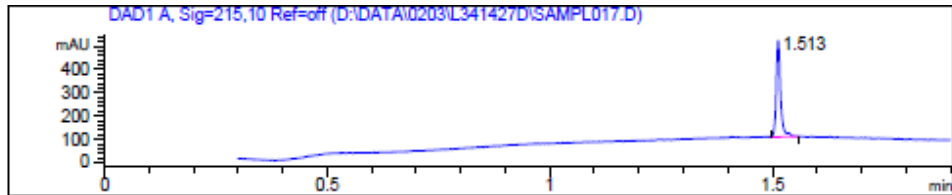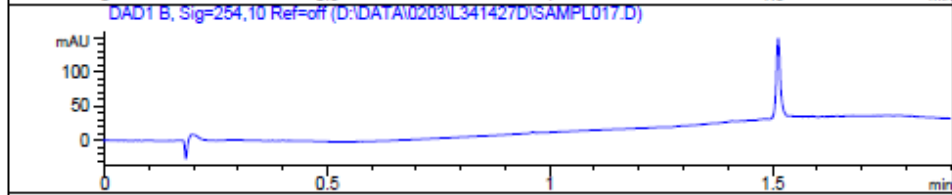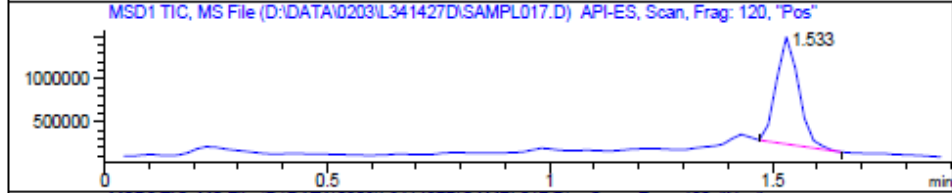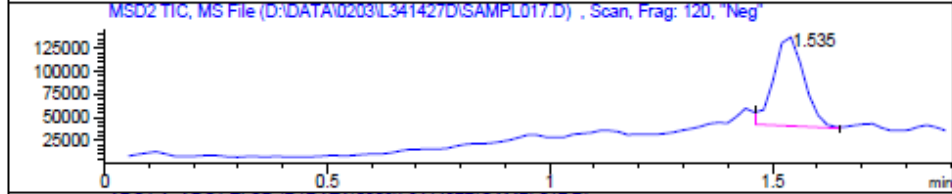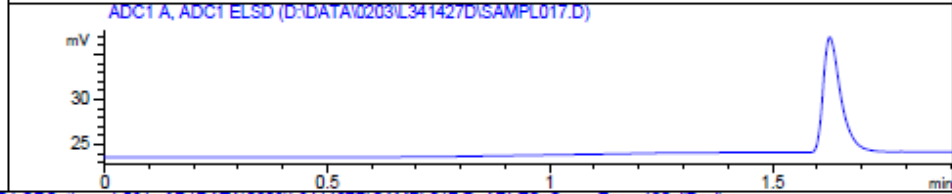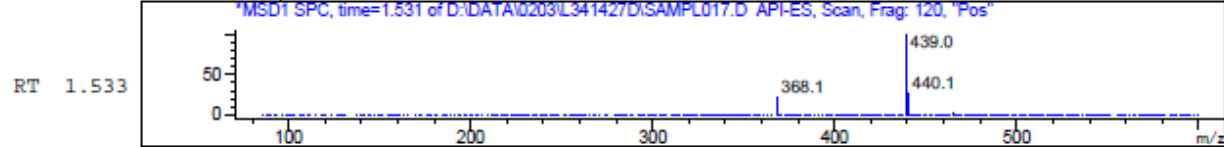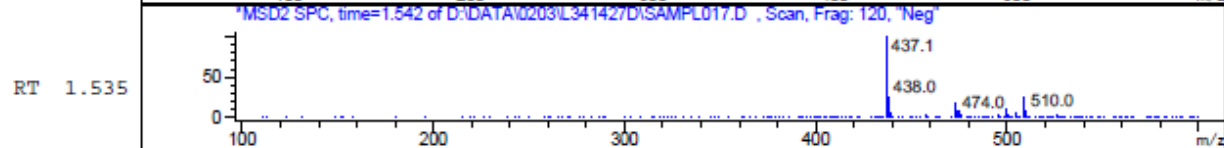



<sup>1</sup>H NMR spectrum of Z1893860264

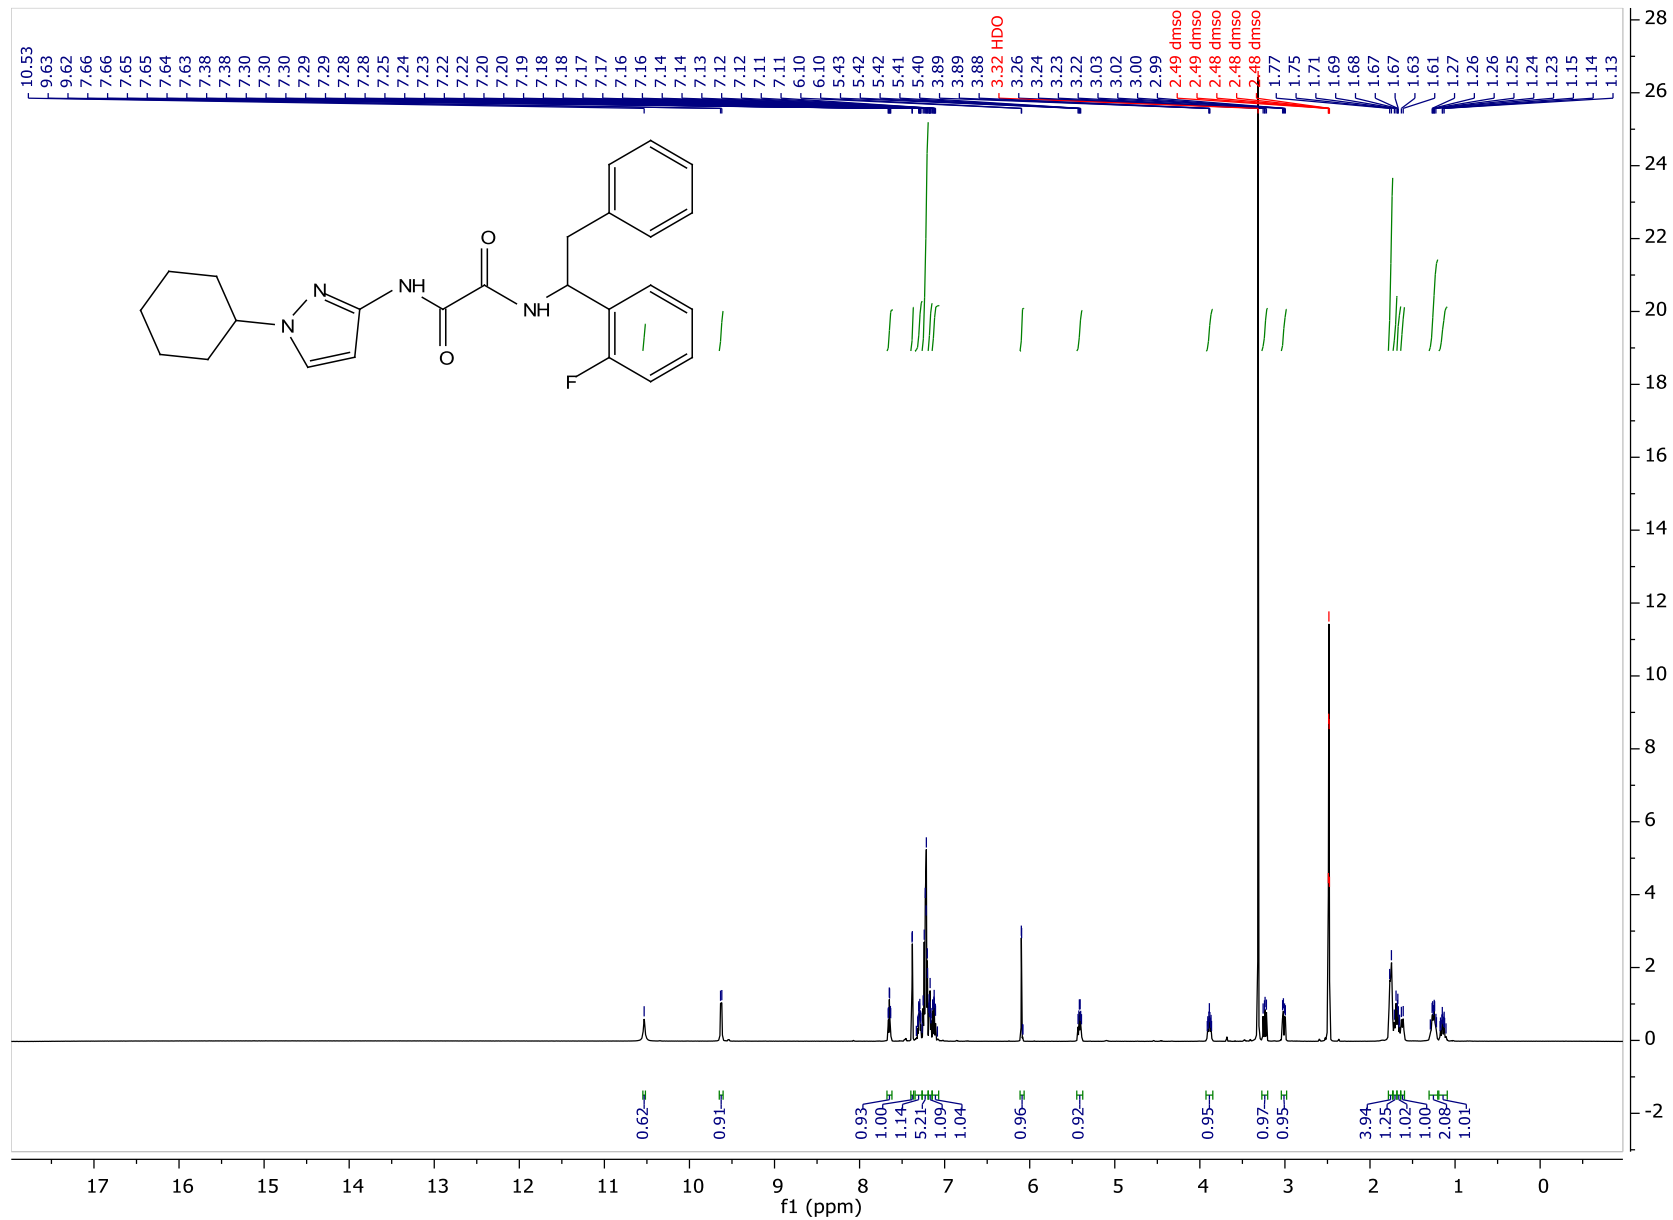

<sup>13</sup>C NMR spectrum of Z1893860264

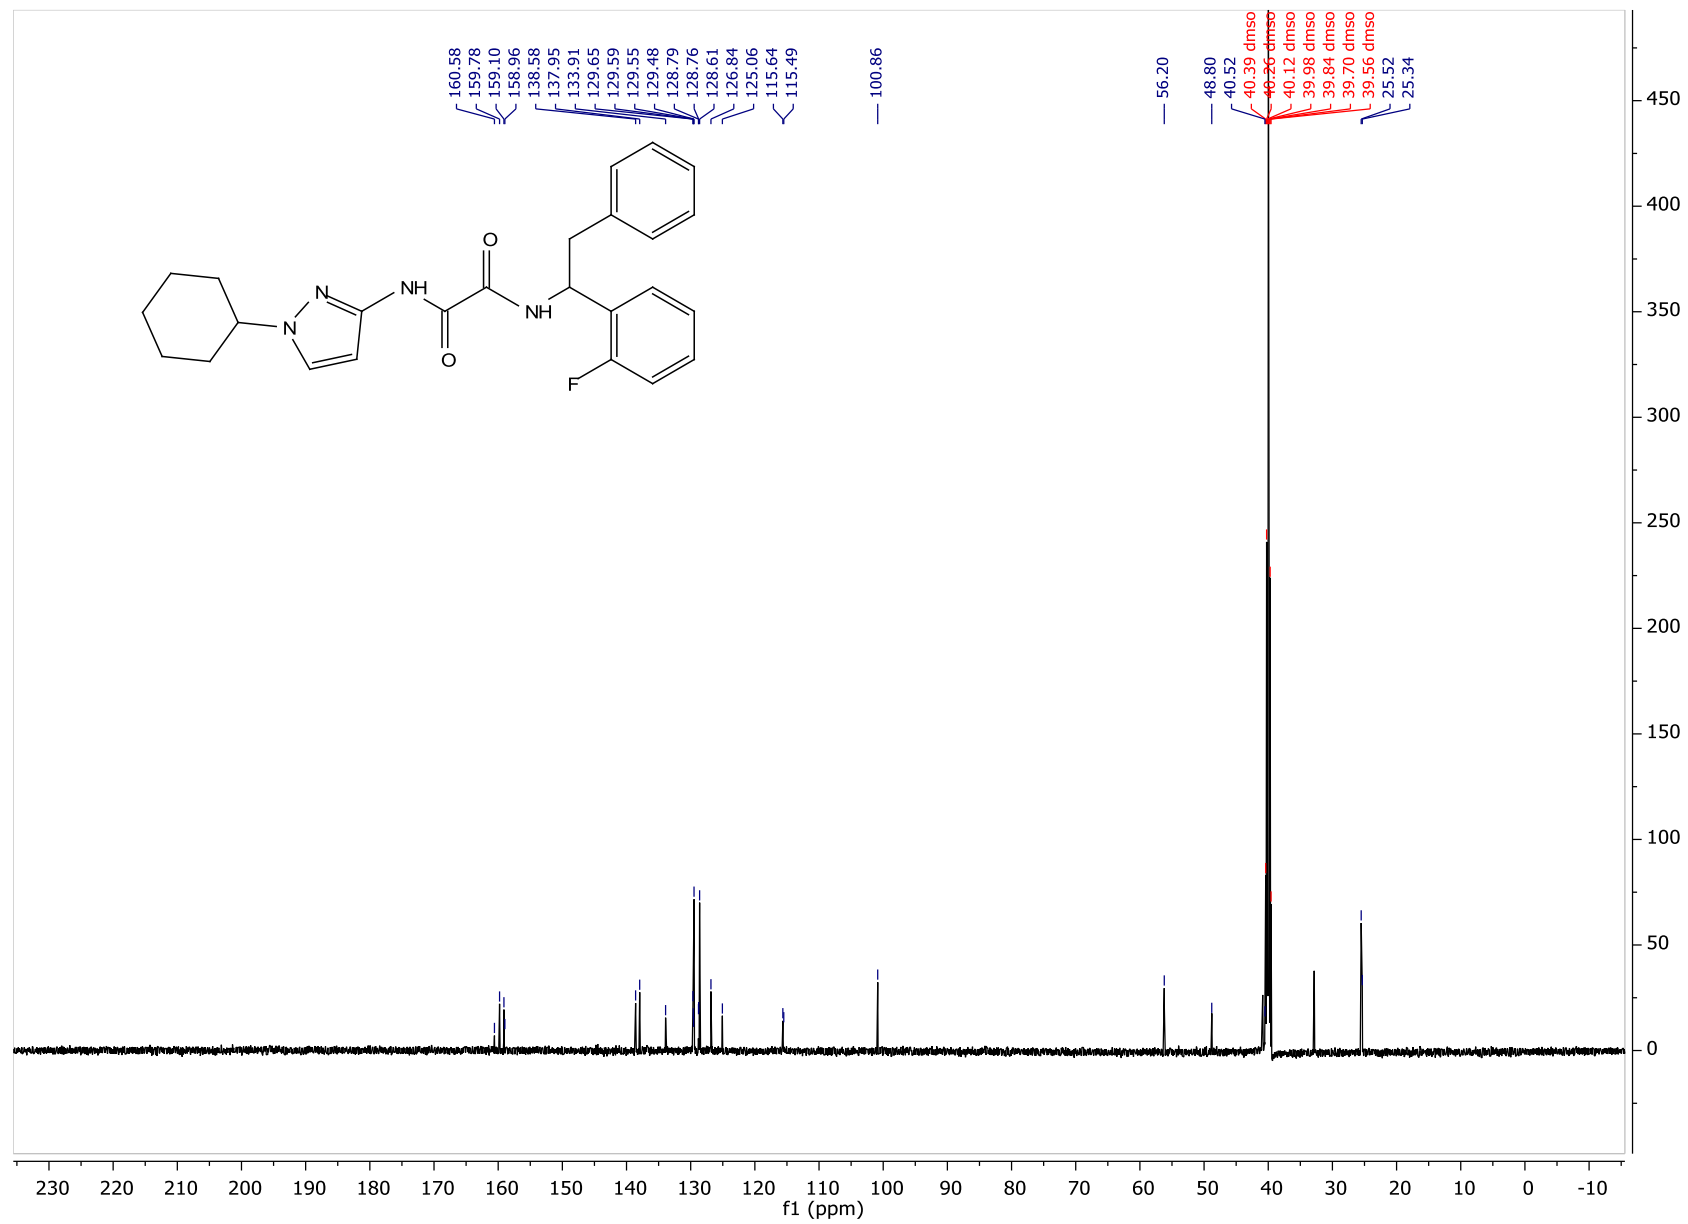

LC/MS spectrum of Z1893860264

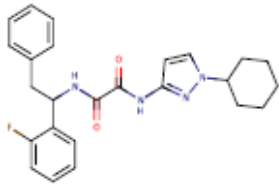

Mol Wt 434.51  
 Exact Mass 434.25

| # | Time  | Area%  |
|---|-------|--------|
| 1 | 1.559 | 100.00 |

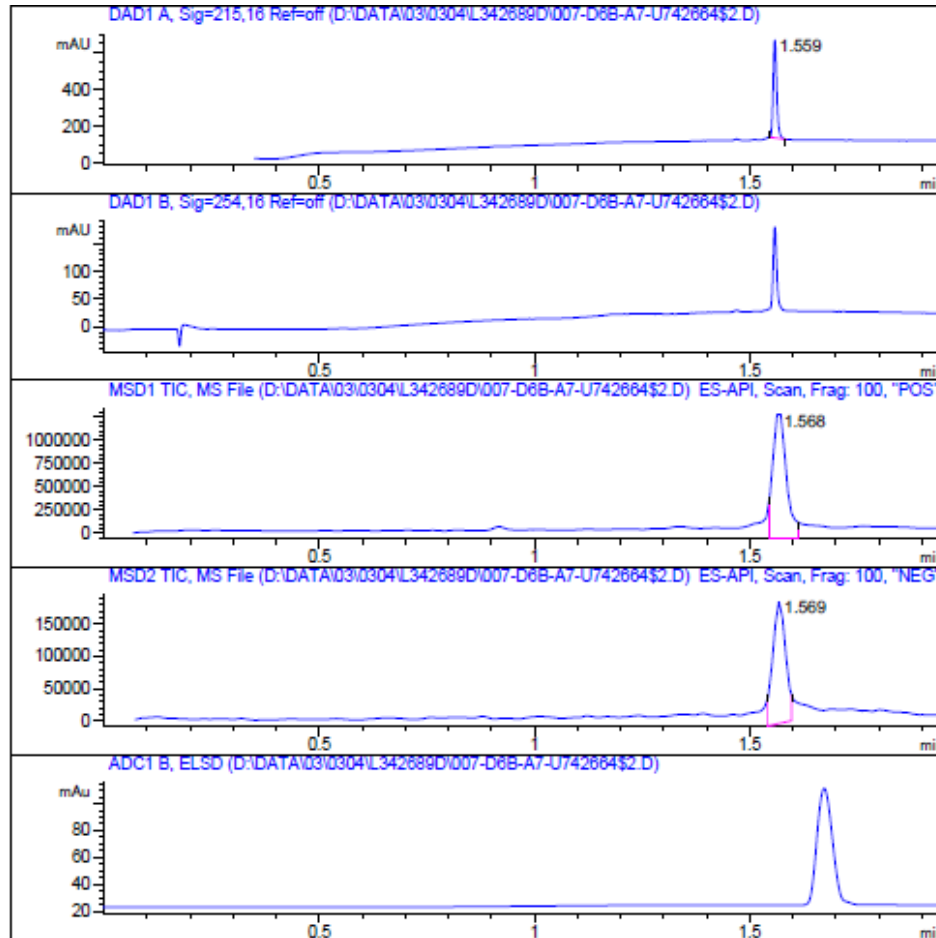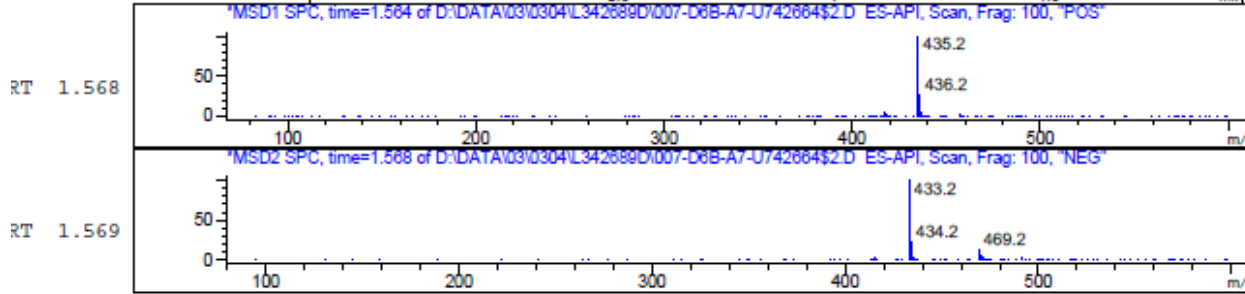

<sup>1</sup>H NMR spectrum of Z1894051580

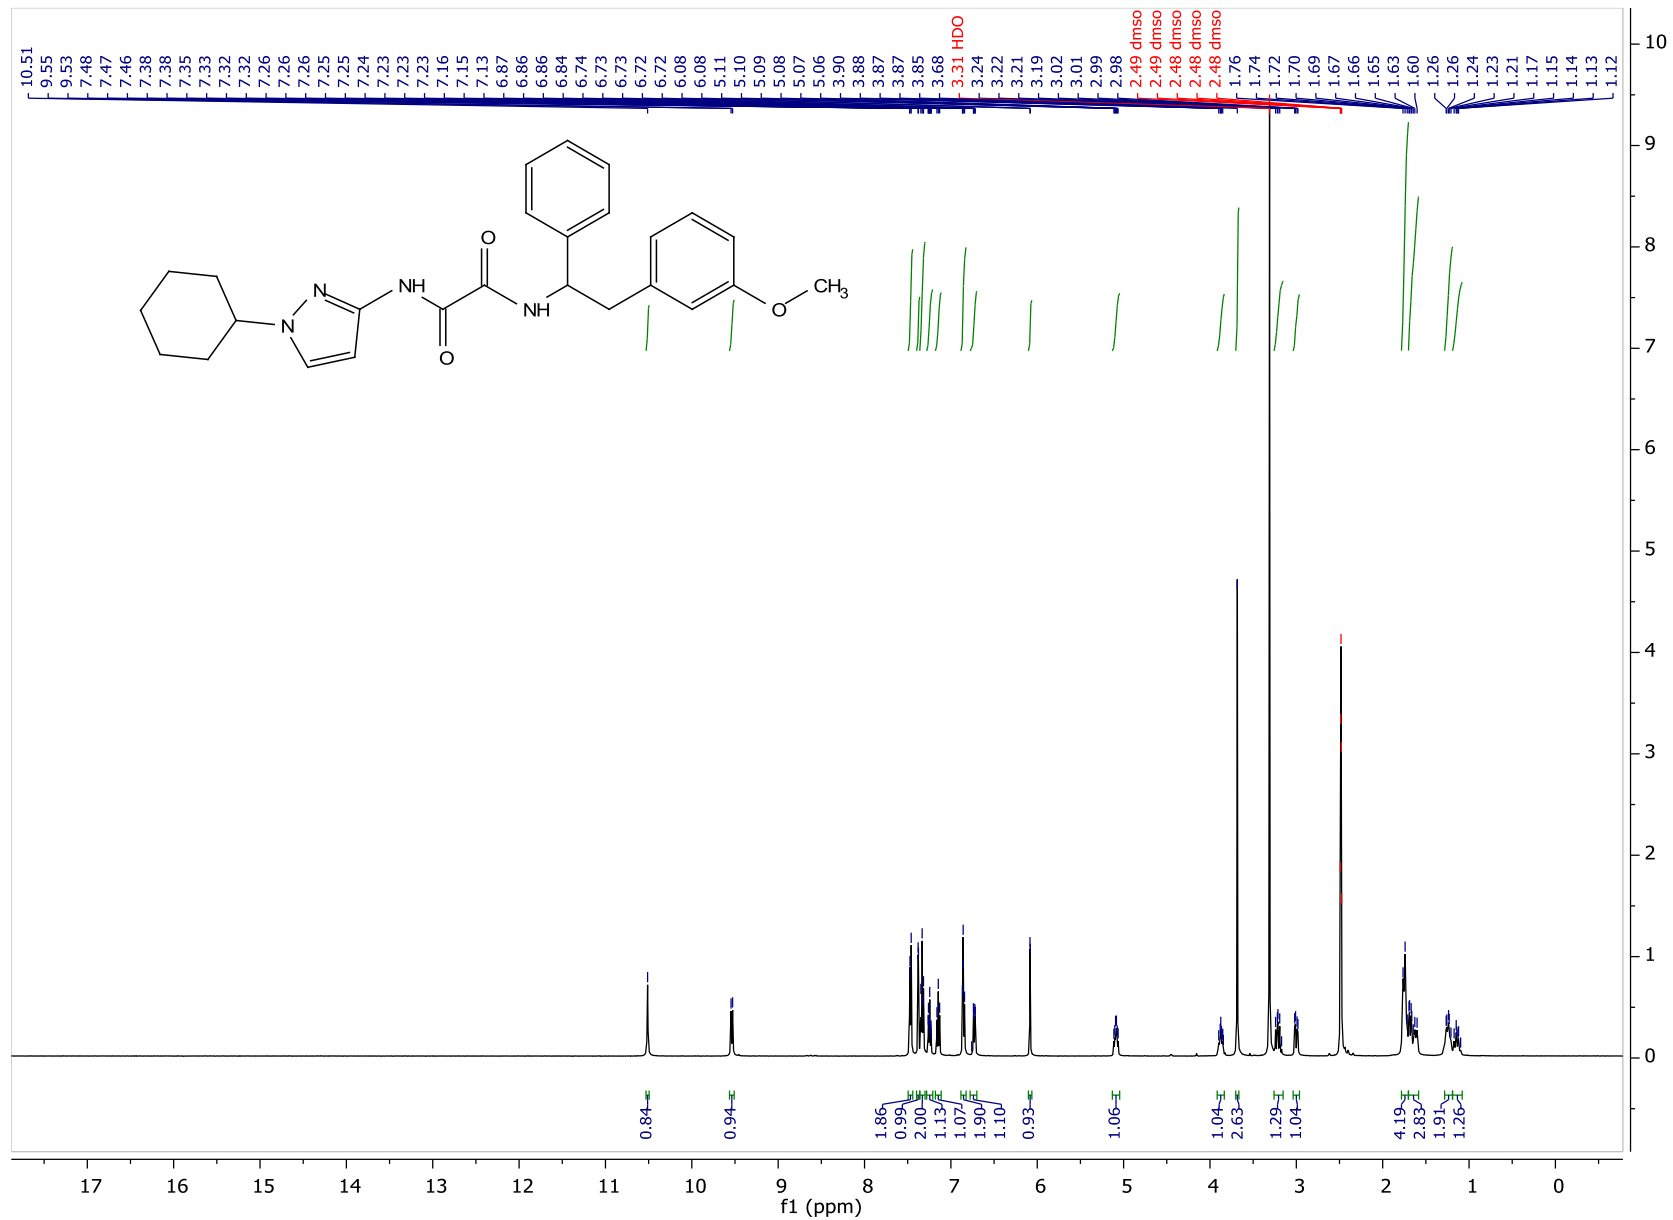

<sup>13</sup>C NMR spectrum of Z1894051580

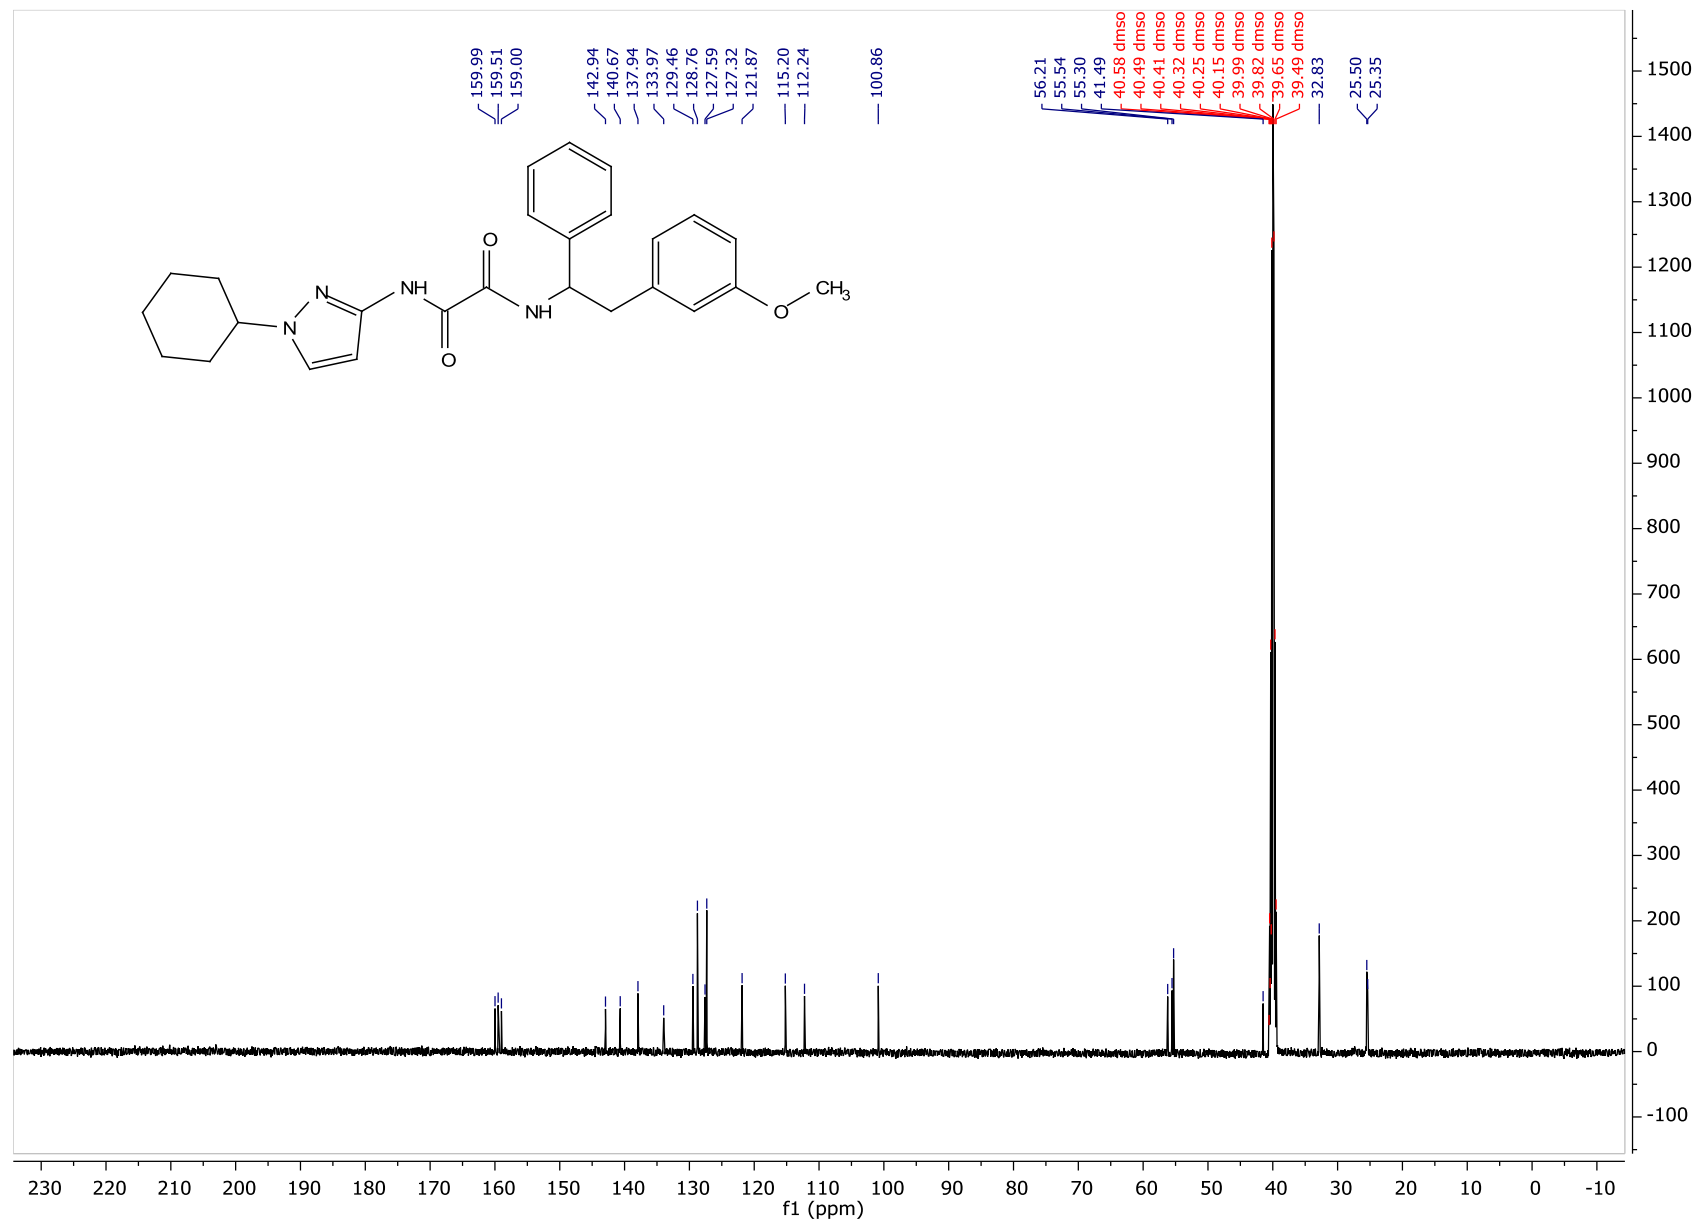

LC/MS spectrum of Z1894051580

Ret\_Time: 1.369 min

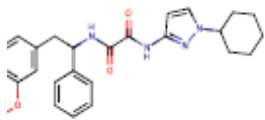

Mol Wt 446.54

Exact Mass 446.27

| # | Time  | Area%  |
|---|-------|--------|
| 1 | 1.369 | 100.00 |

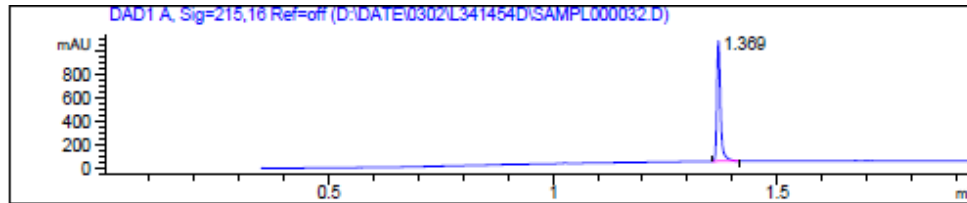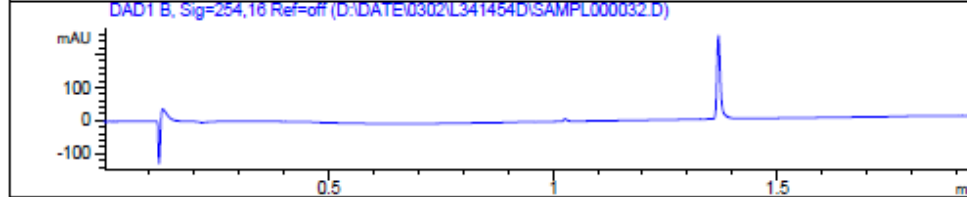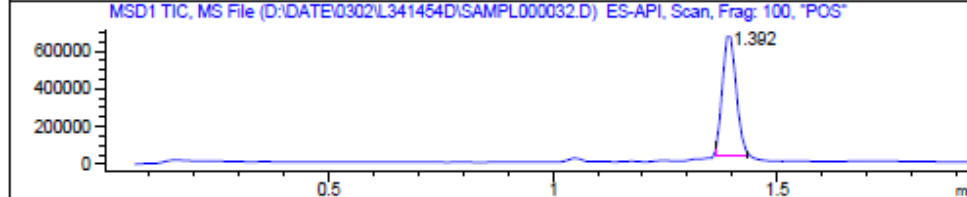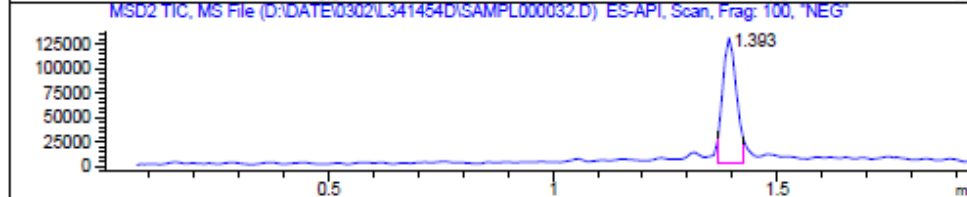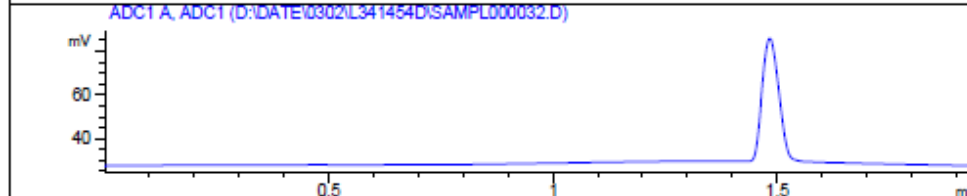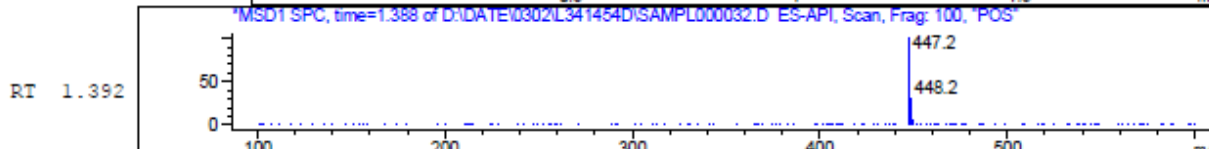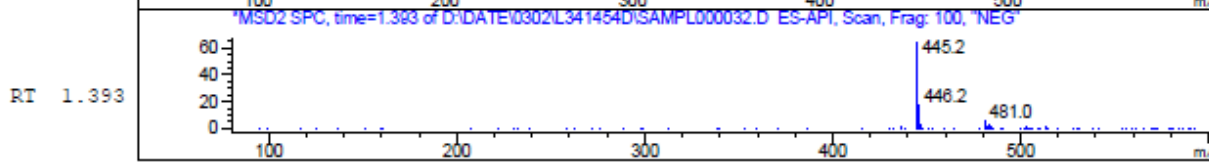

<sup>1</sup>H NMR spectrum of Z1894264392

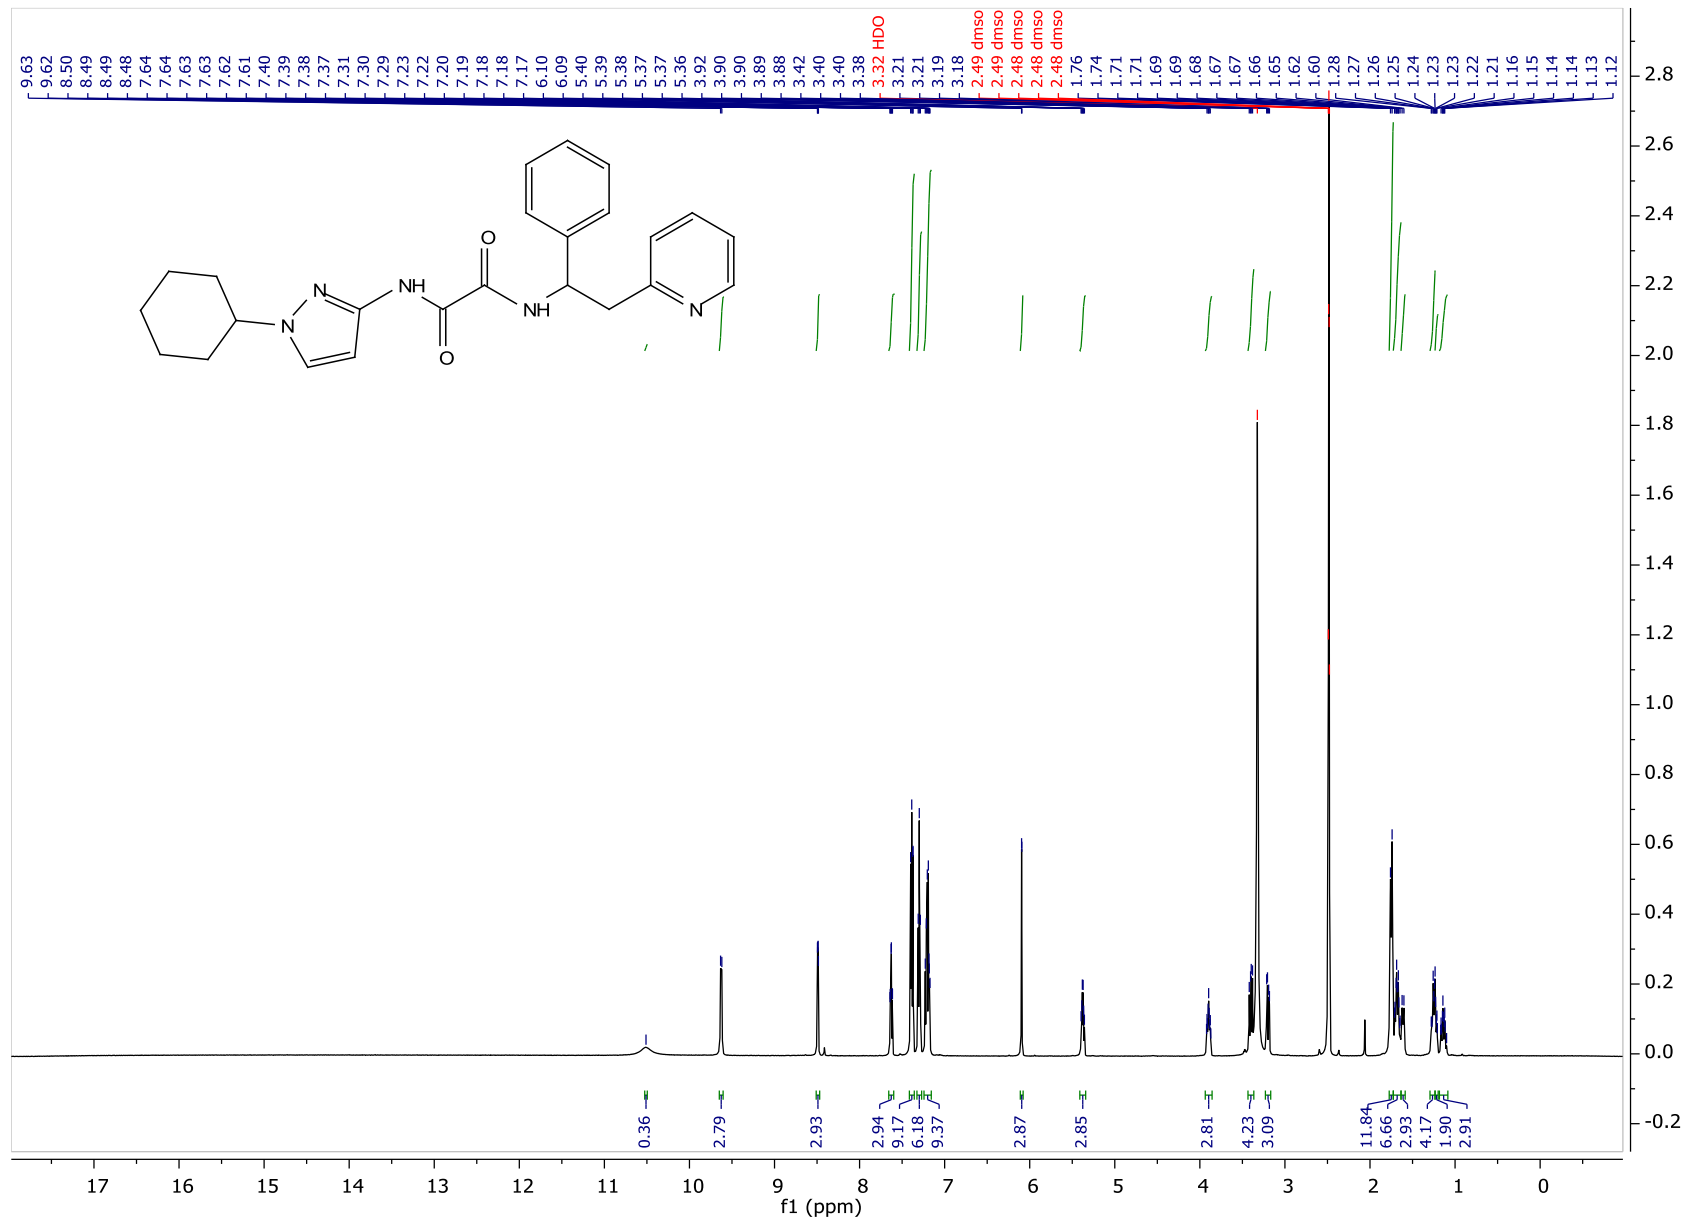

<sup>13</sup>C NMR spectrum of Z1894264392

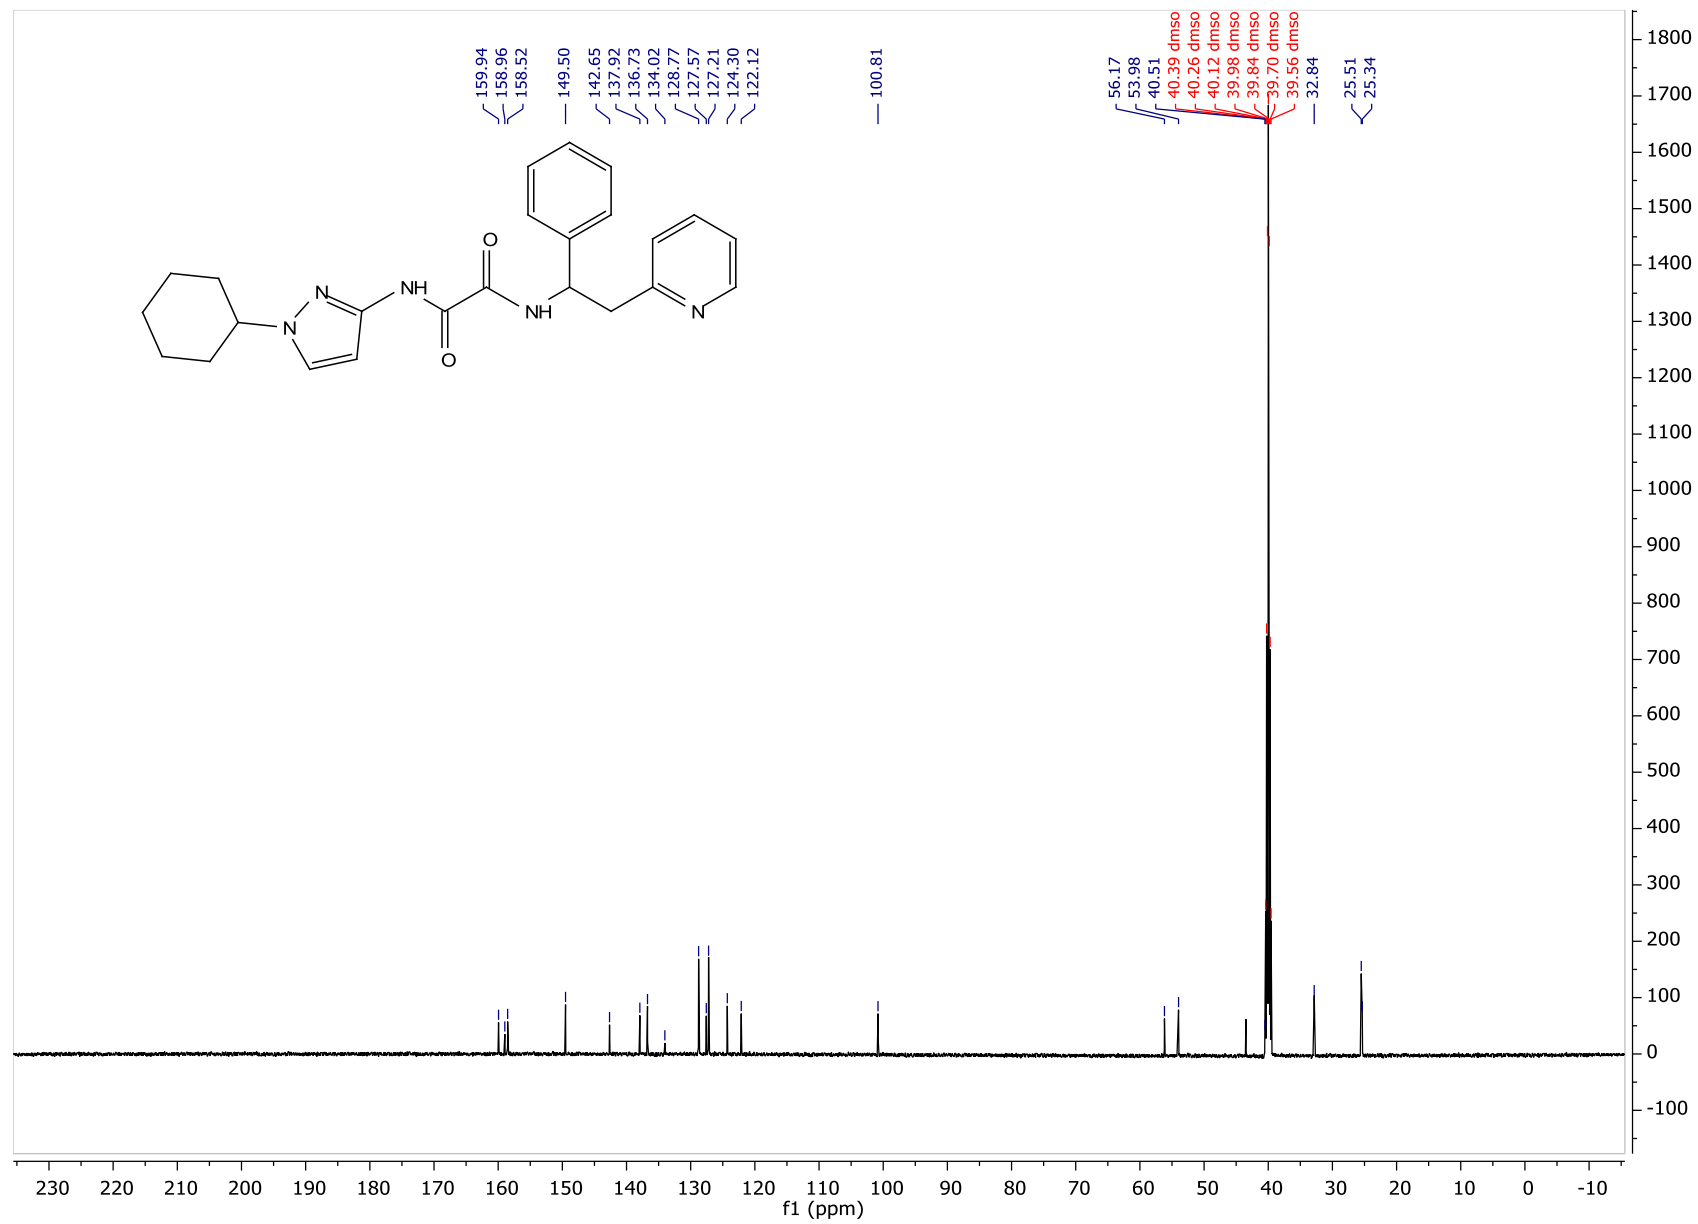



LC/MS spectrum of Z1894264392

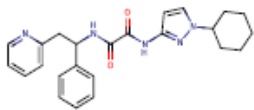

Mol Wt 417.5  
Exact Mass 417.25

| # | Time  | Area% |
|---|-------|-------|
| 1 | 0.713 | 5.25  |
| 2 | 1.204 | 94.75 |

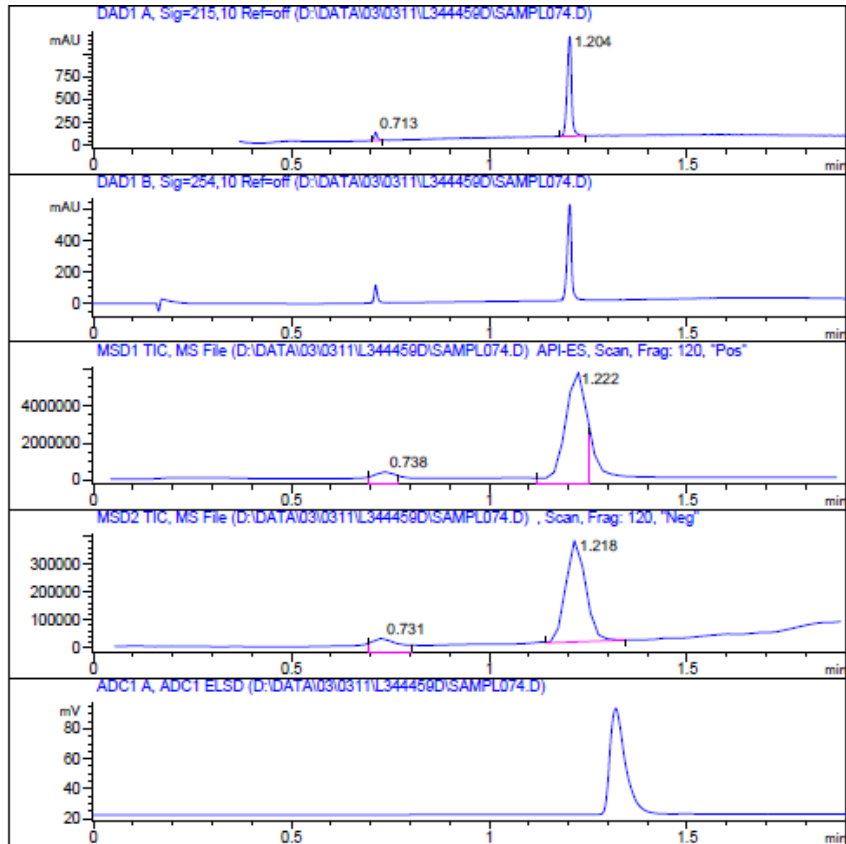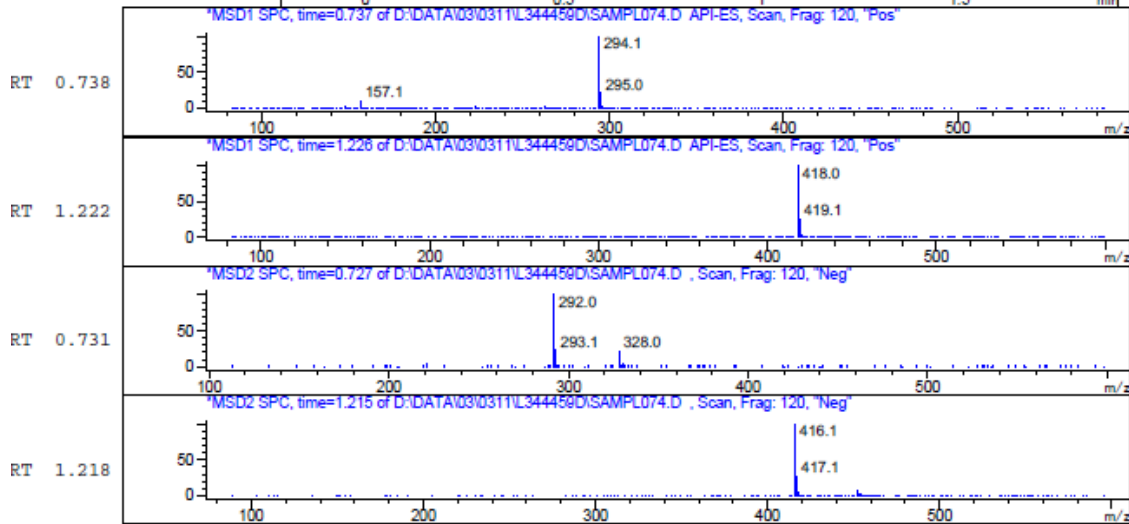

<sup>1</sup>H NMR spectrum of Z1894516221

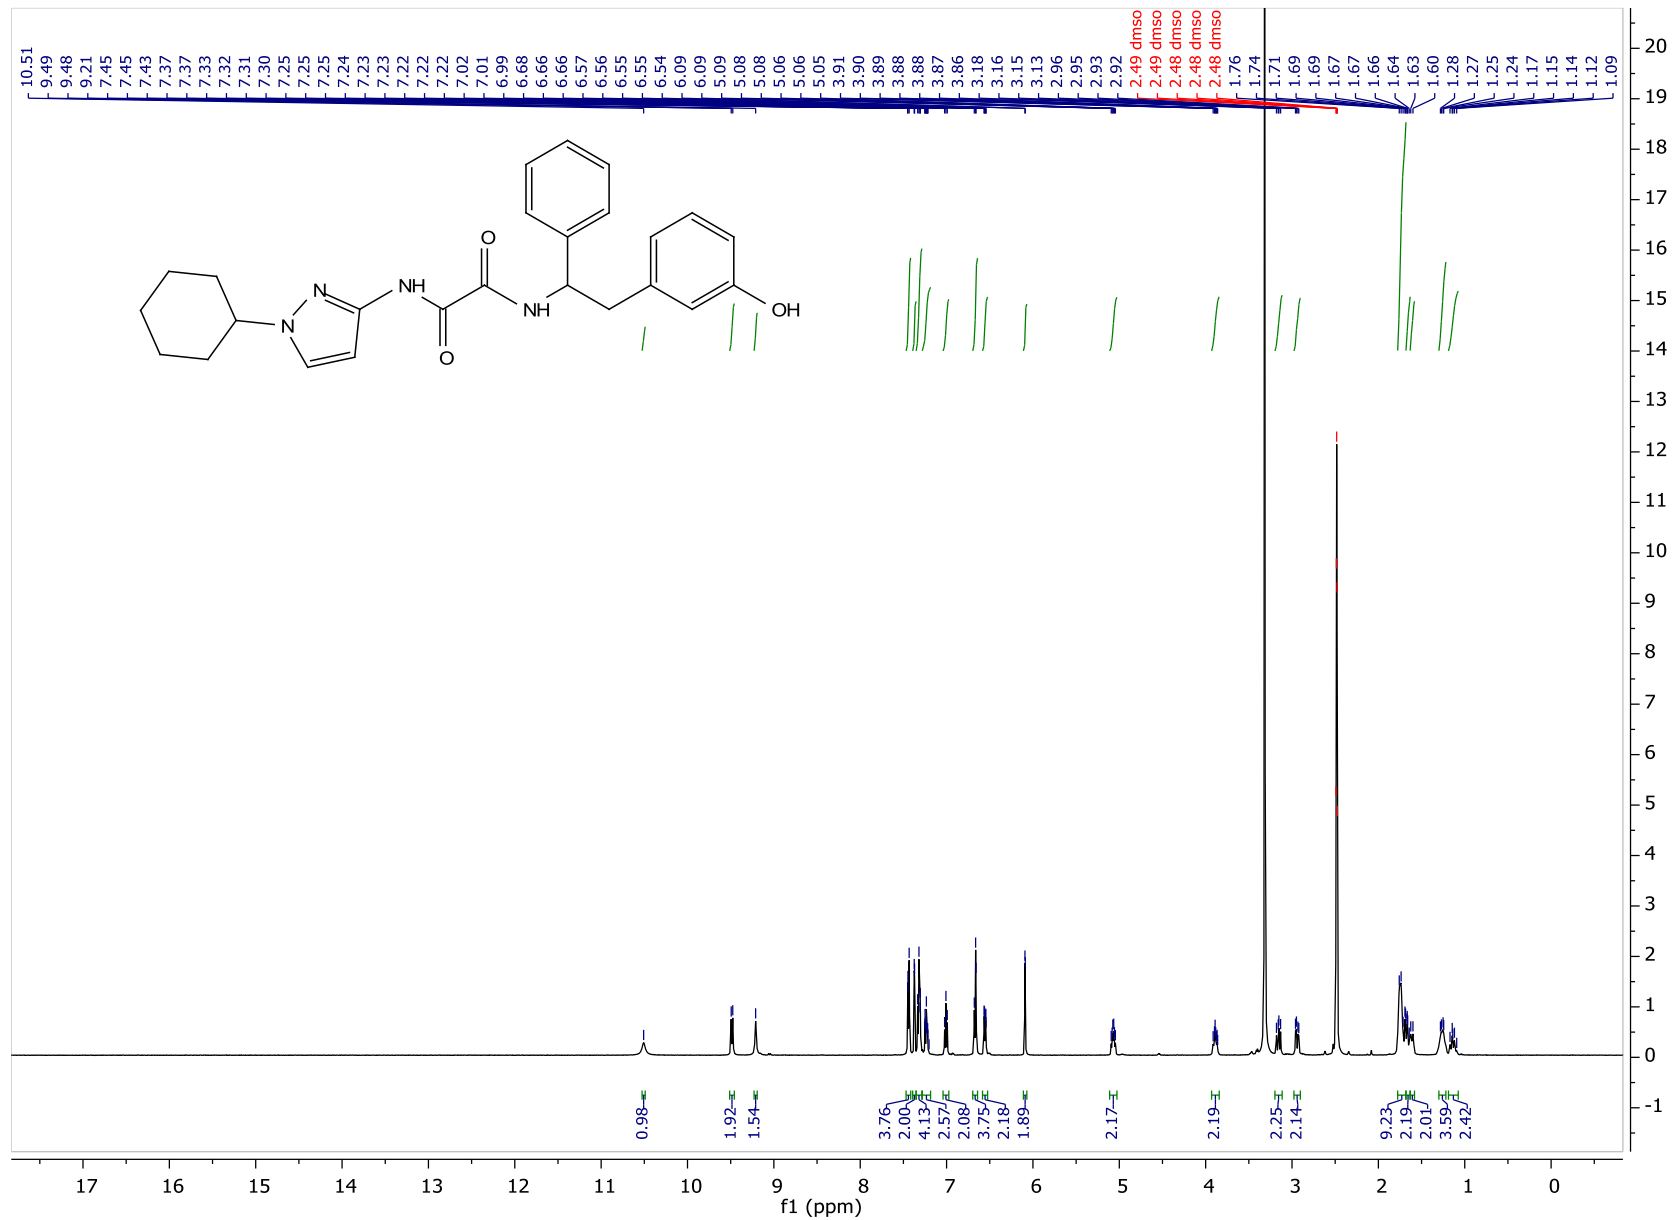

<sup>13</sup>C NMR spectrum of Z1894516221

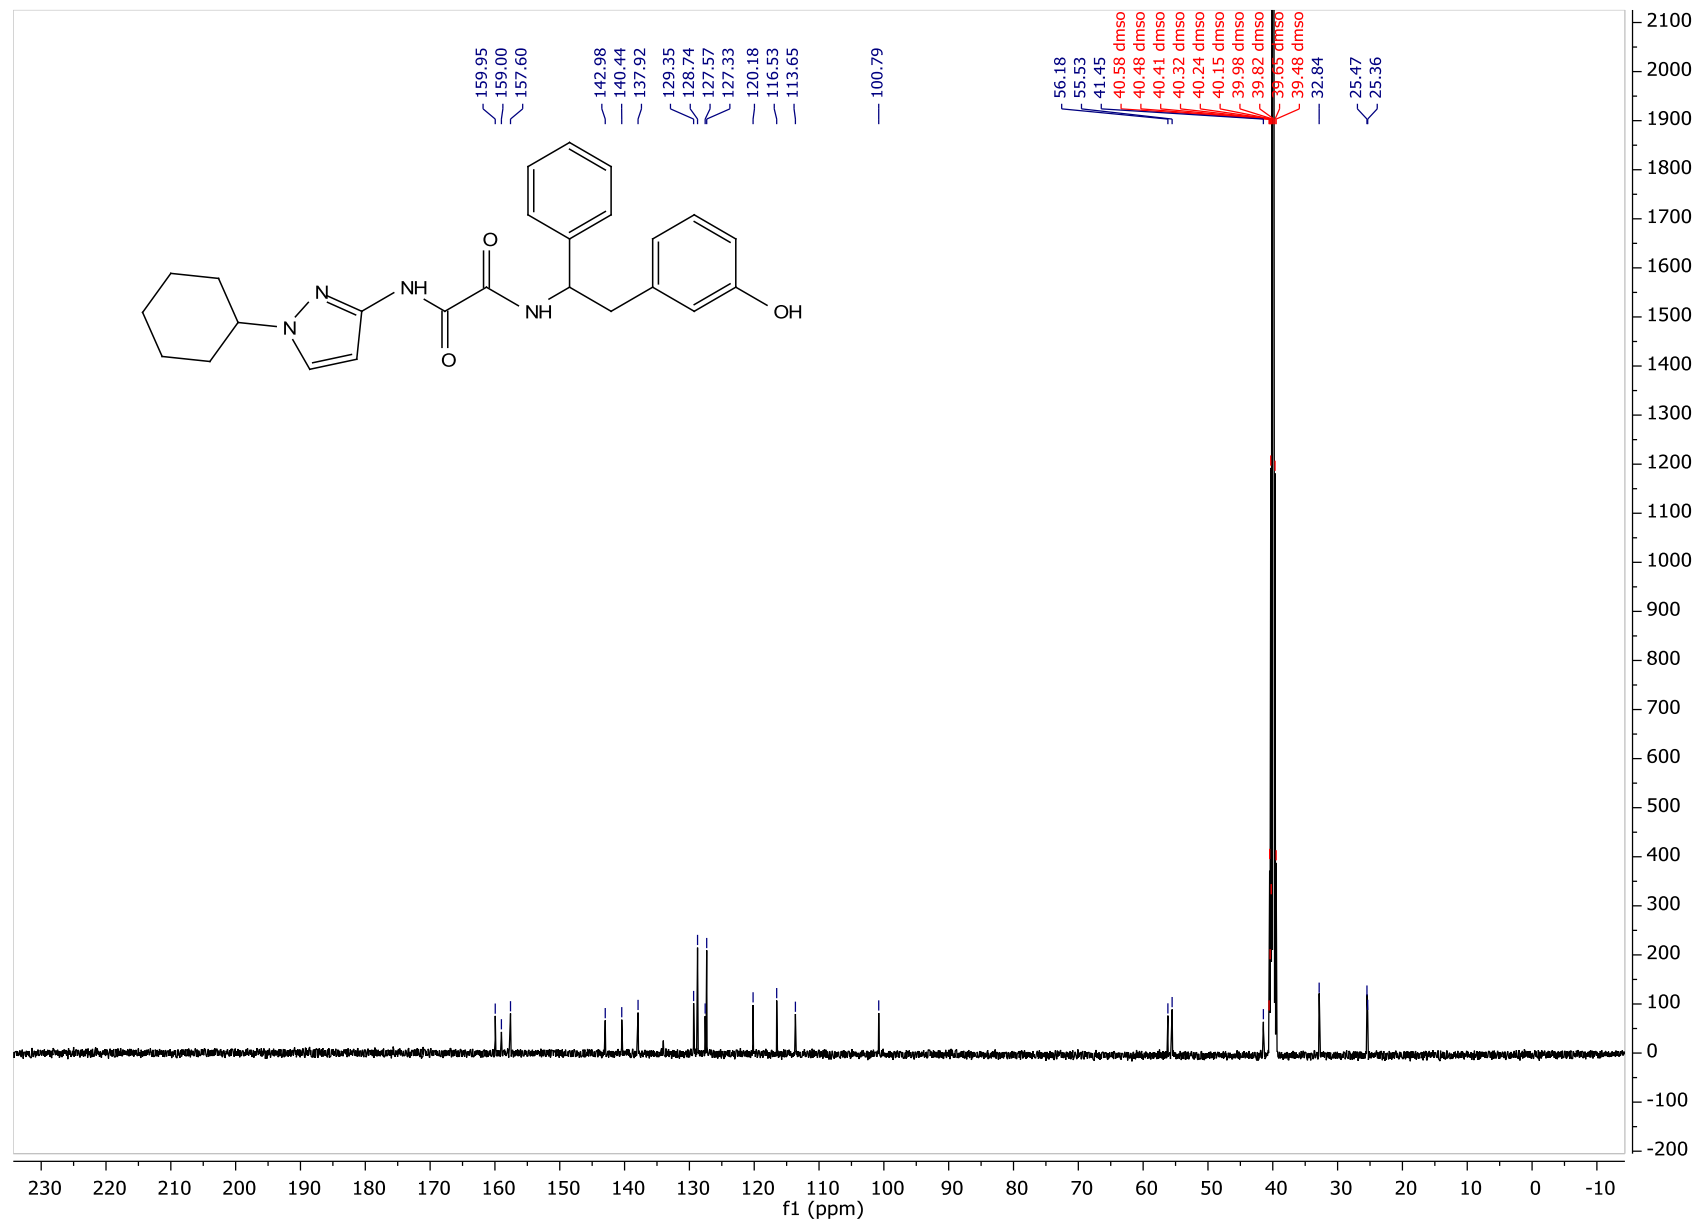

LC/MS spectrum of Z1894516221

Ret\_Time: 1.437 min

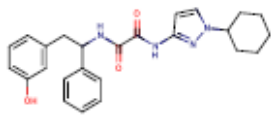

Mol Wt 432.52  
Exact Mass 432.25

| # | Time  | Area%  |
|---|-------|--------|
| 1 | 1.437 | 100.00 |

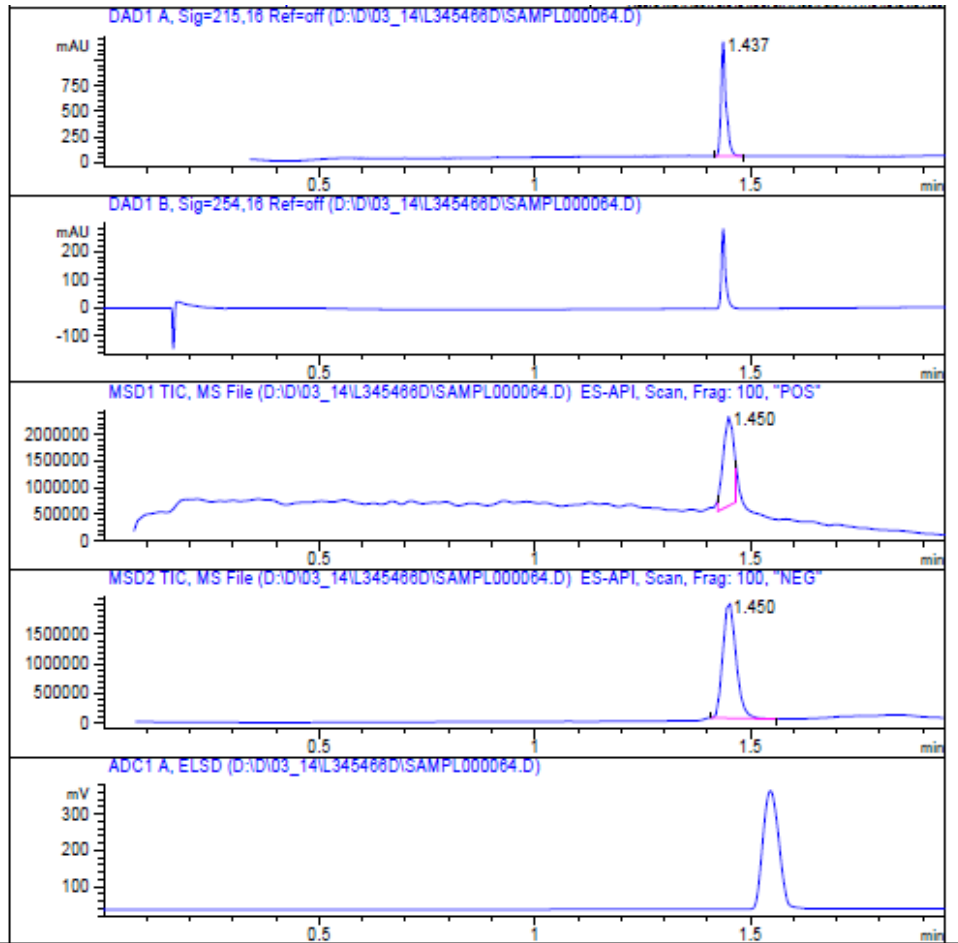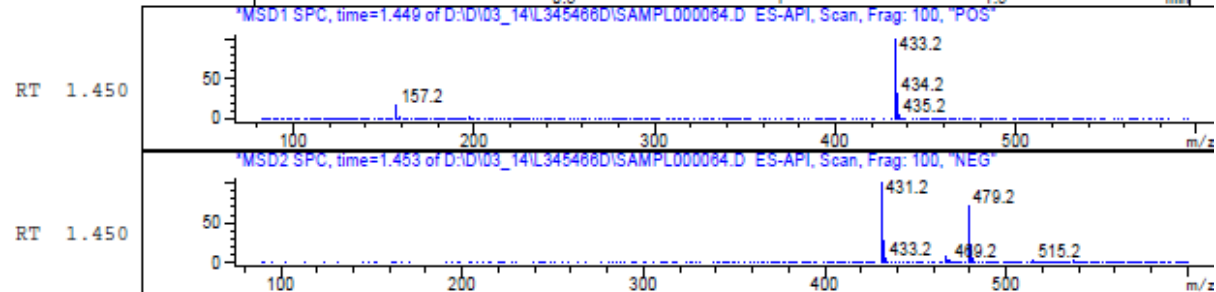

<sup>1</sup>H NMR spectrum of Z2173483653

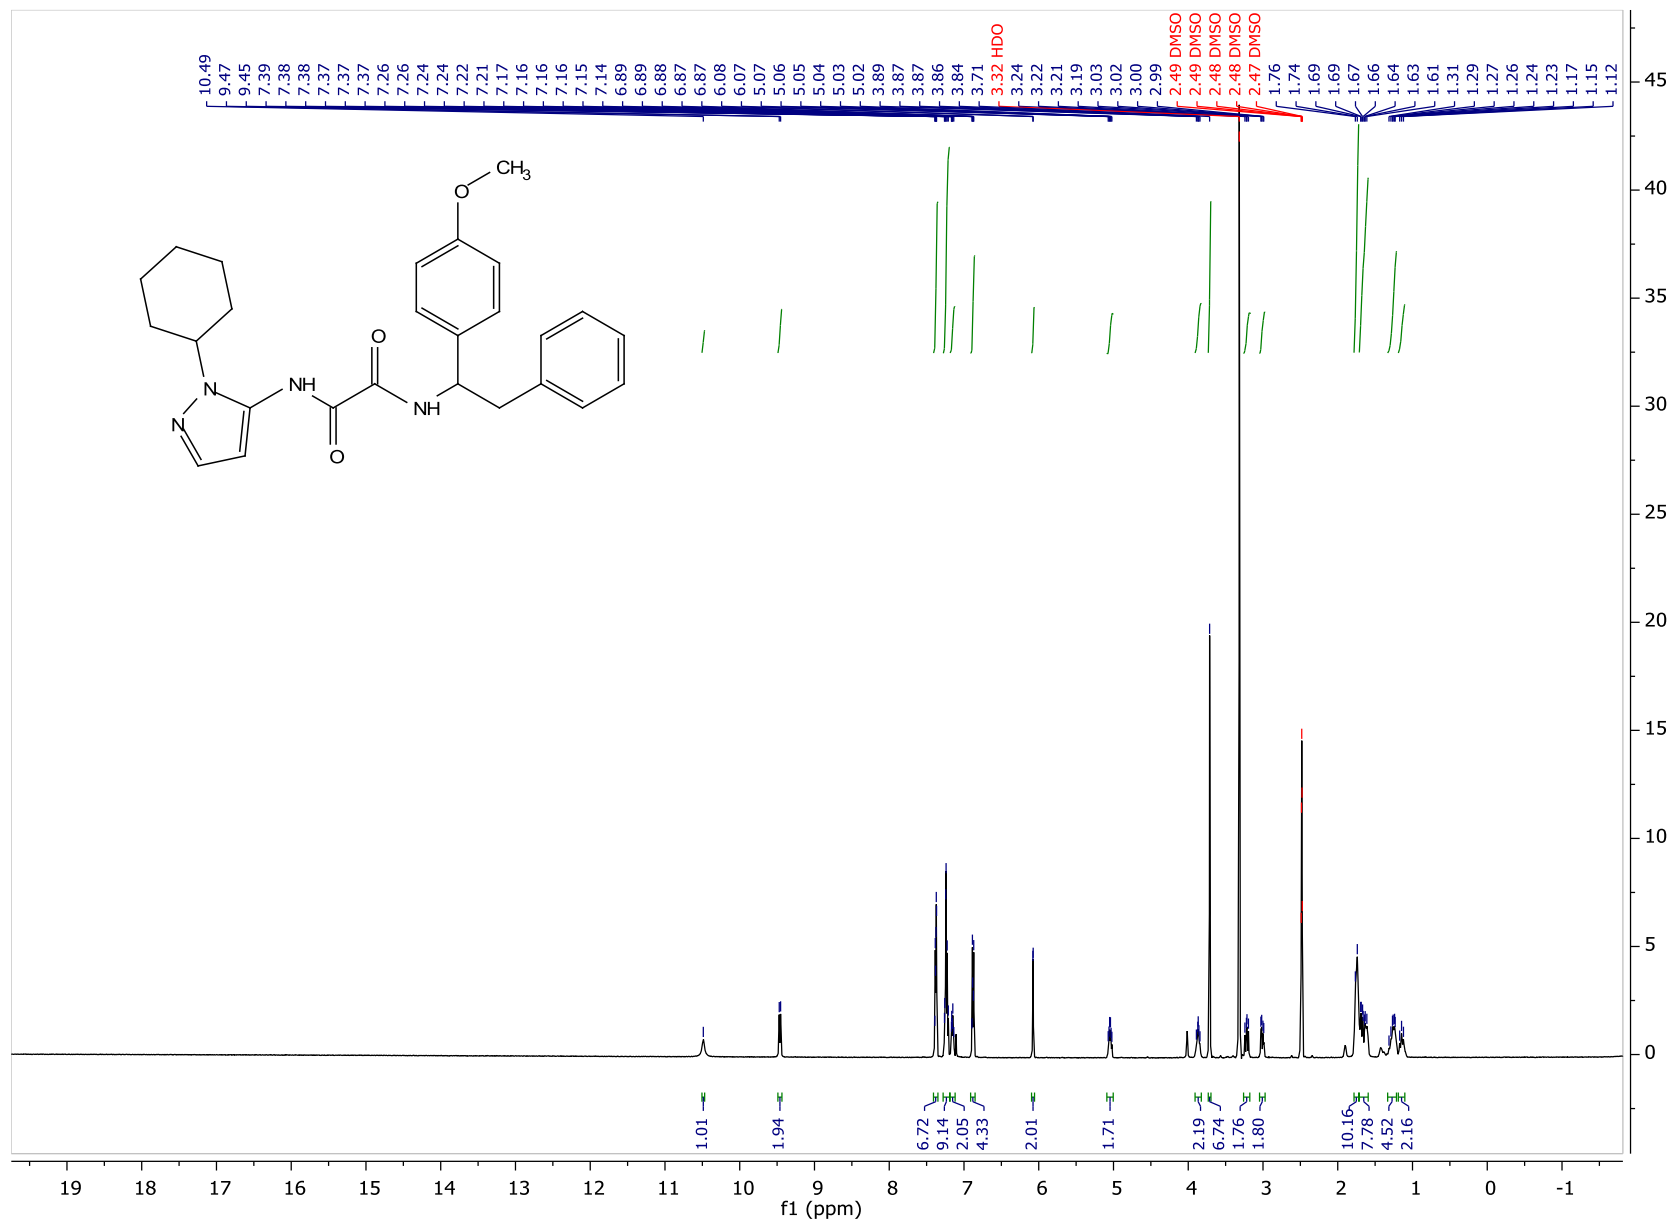

<sup>13</sup>C NMR spectrum of Z2173483653

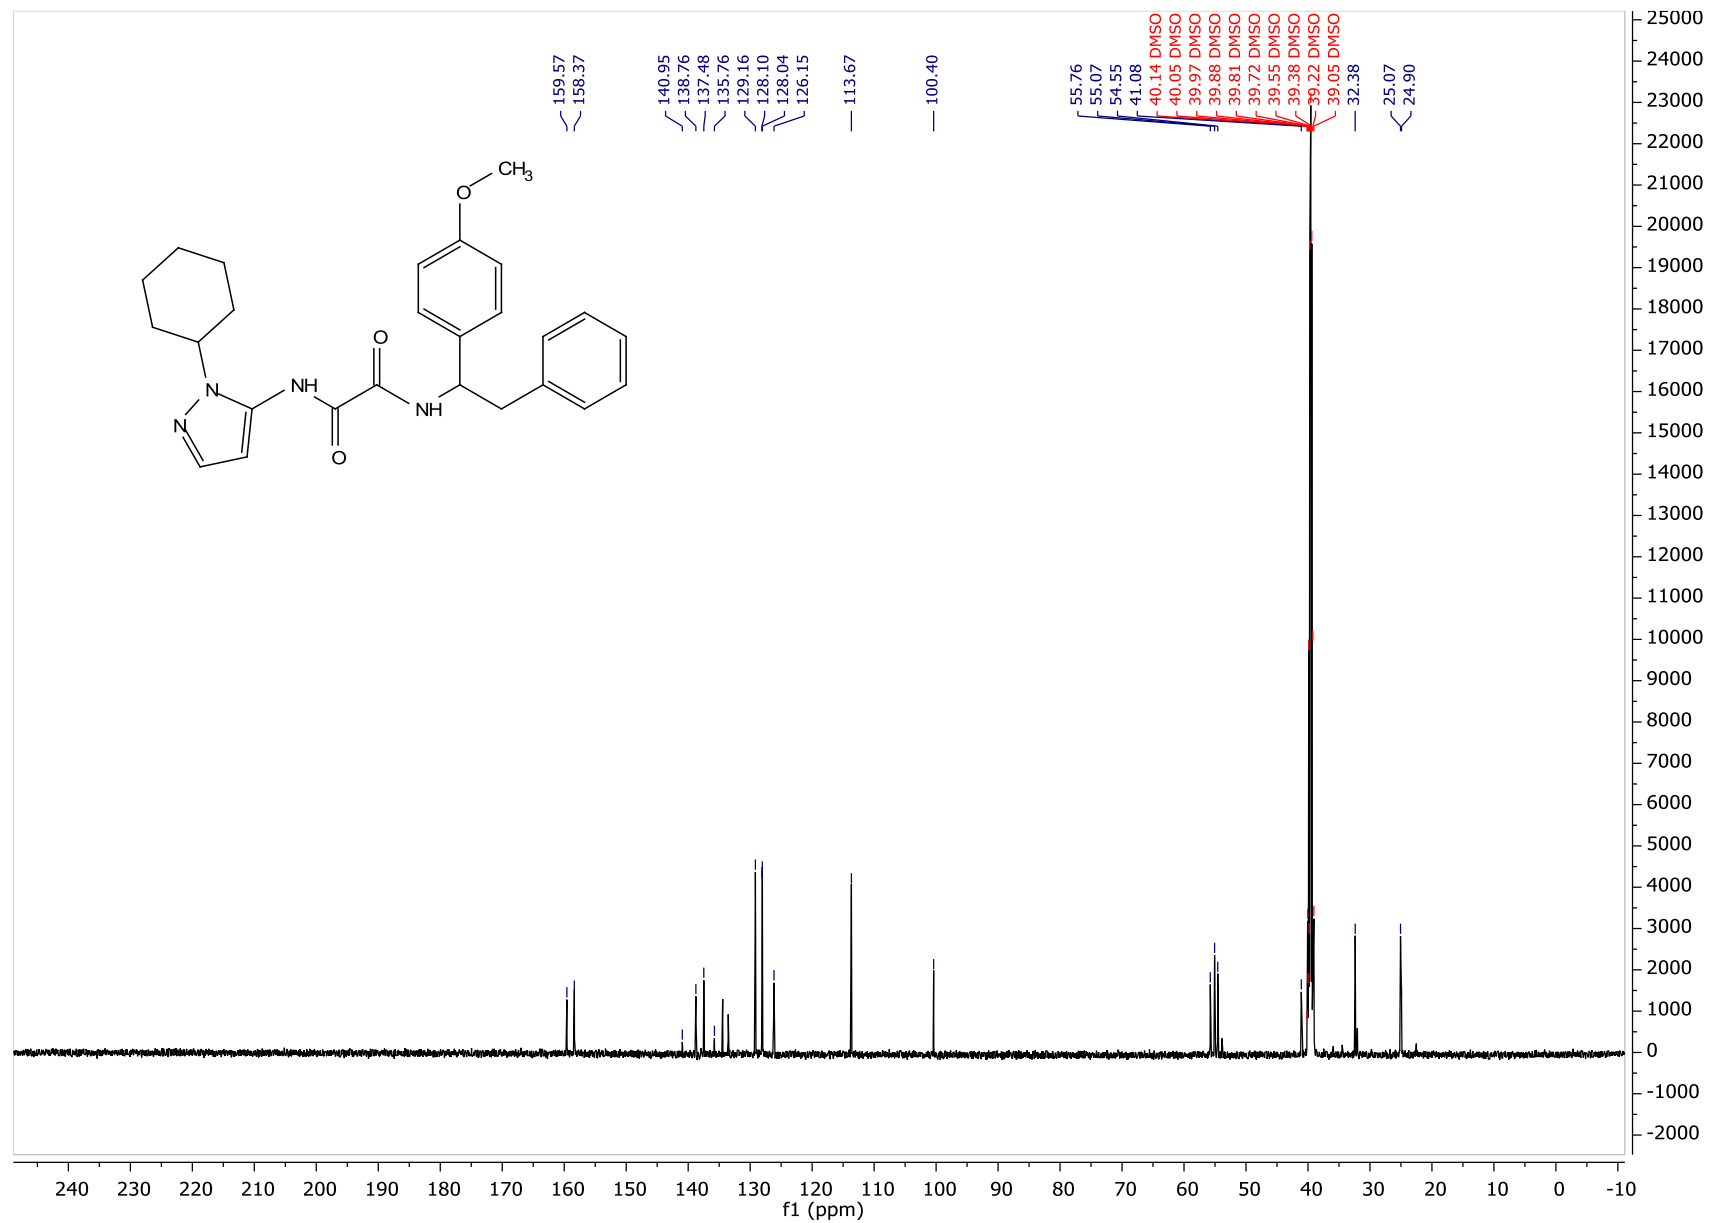

LC/MS spectrum of Z2173483653

Ret\_Time: 1.546 min

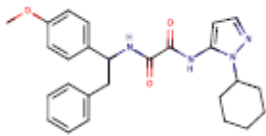

Mol Wt 446.54  
Exact Mass 446.27

| # | Time  | Area% |
|---|-------|-------|
| 1 | 1.123 | 1.65  |
| 2 | 1.546 | 96.52 |
| 3 | 1.639 | 1.82  |

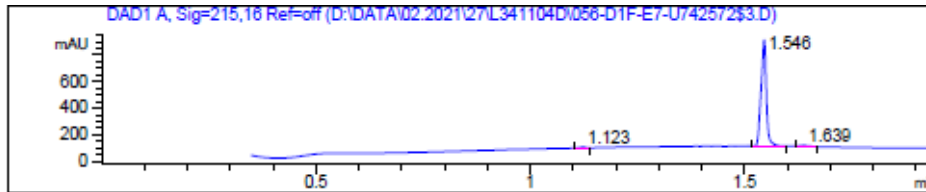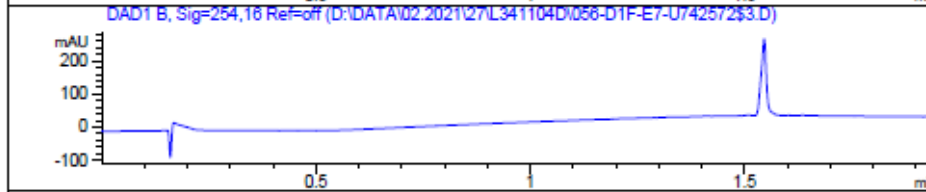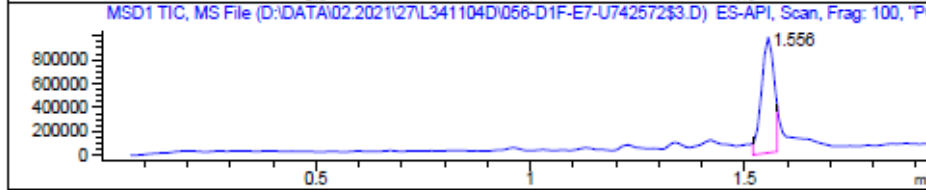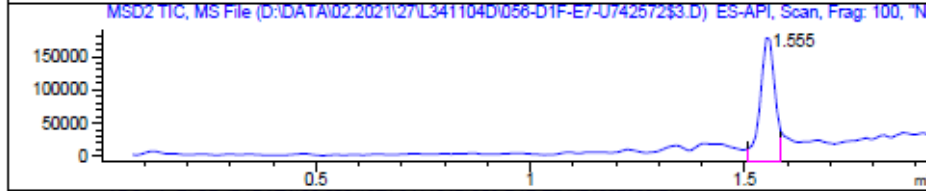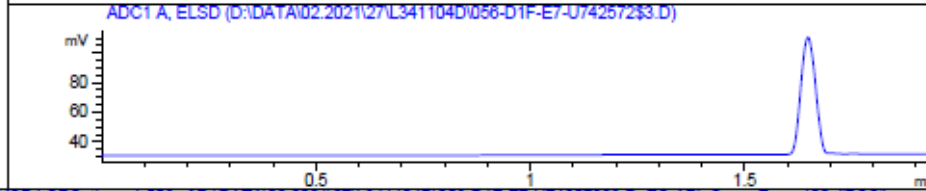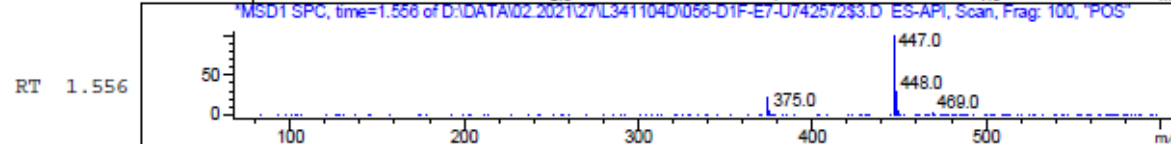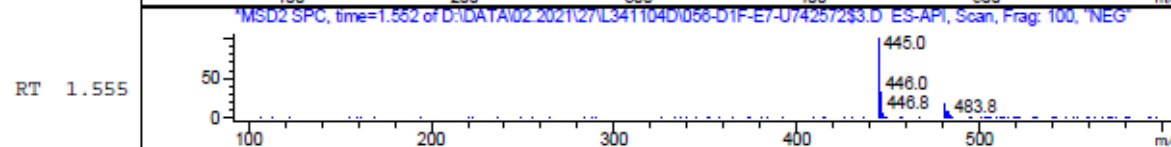

<sup>1</sup>H NMR spectrum of Z2175373672

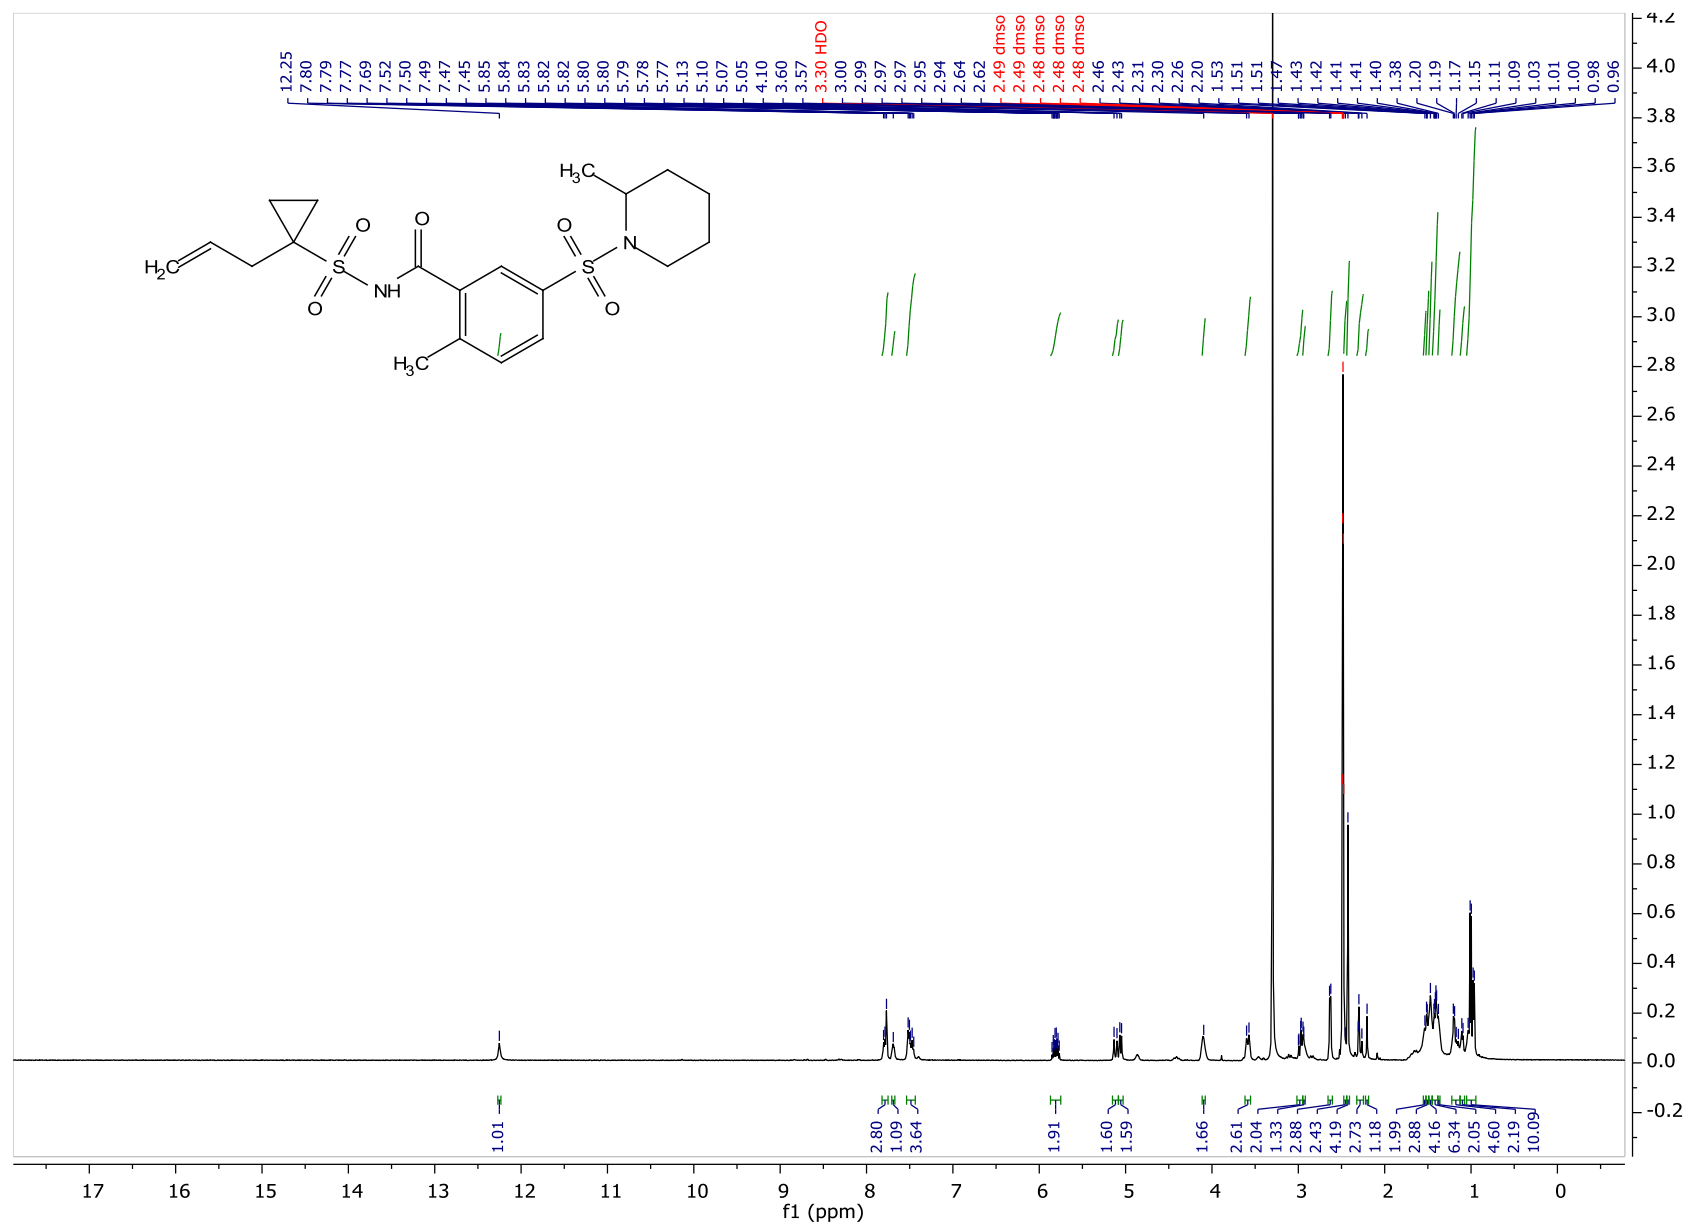



LC/MS spectrum of Z2175373672

Ret\_Time: 3.498 min

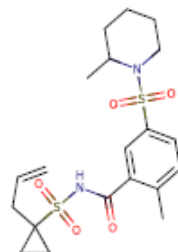

Mol Wt 440.58

Exact Mass 440.17

| # | Time  | Area% |
|---|-------|-------|
| 1 | 2.324 | 1.36  |
| 2 | 3.401 | 1.48  |
| 3 | 3.498 | 97.16 |

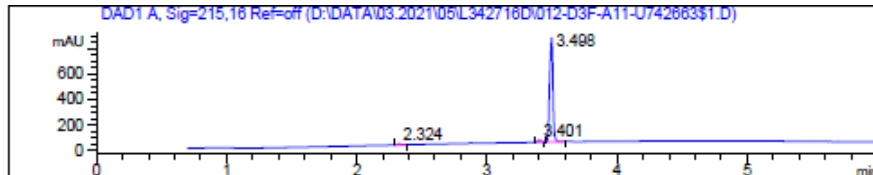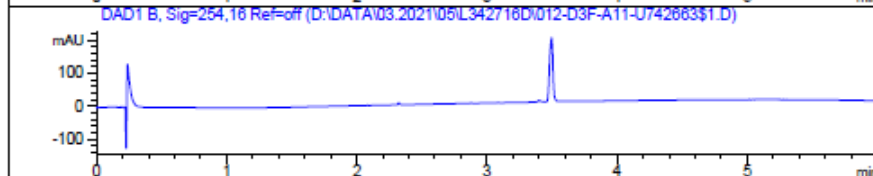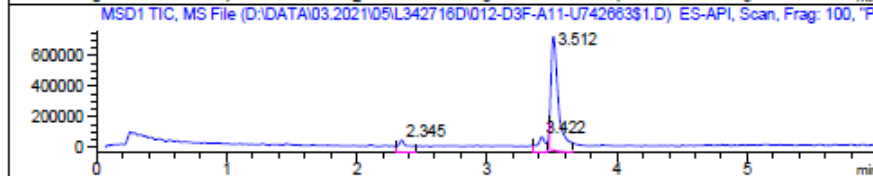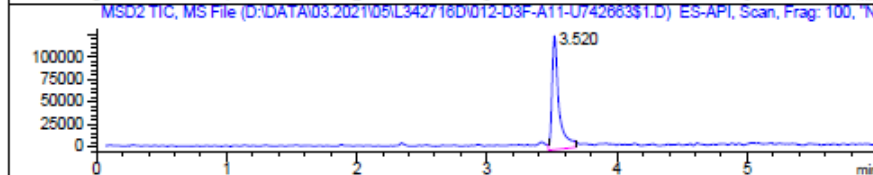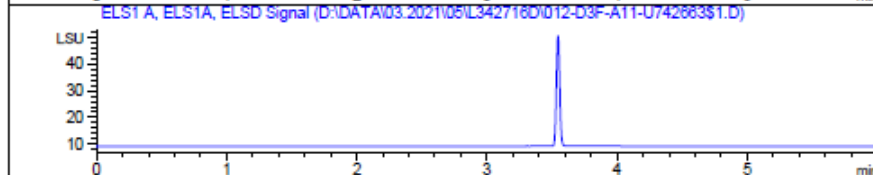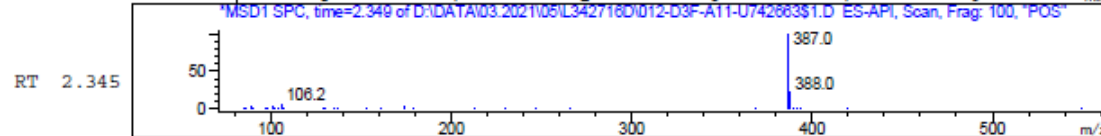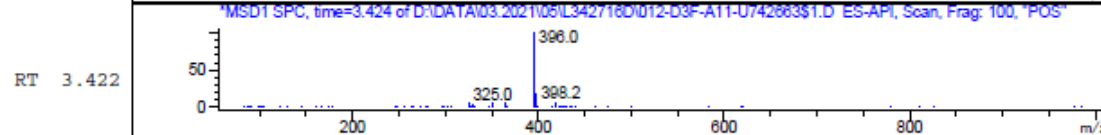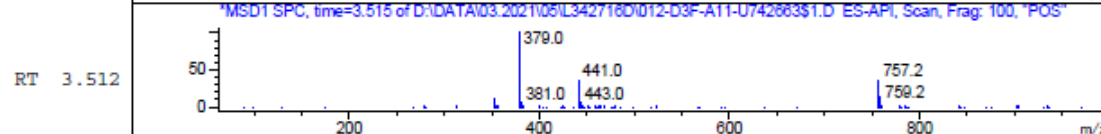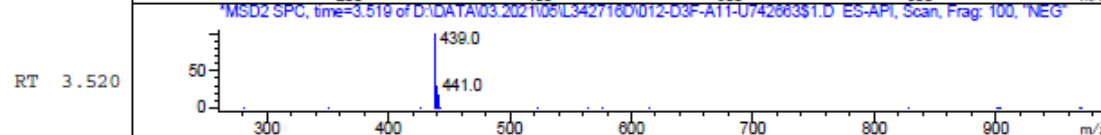

<sup>1</sup>H NMR spectrum of Z2175374182

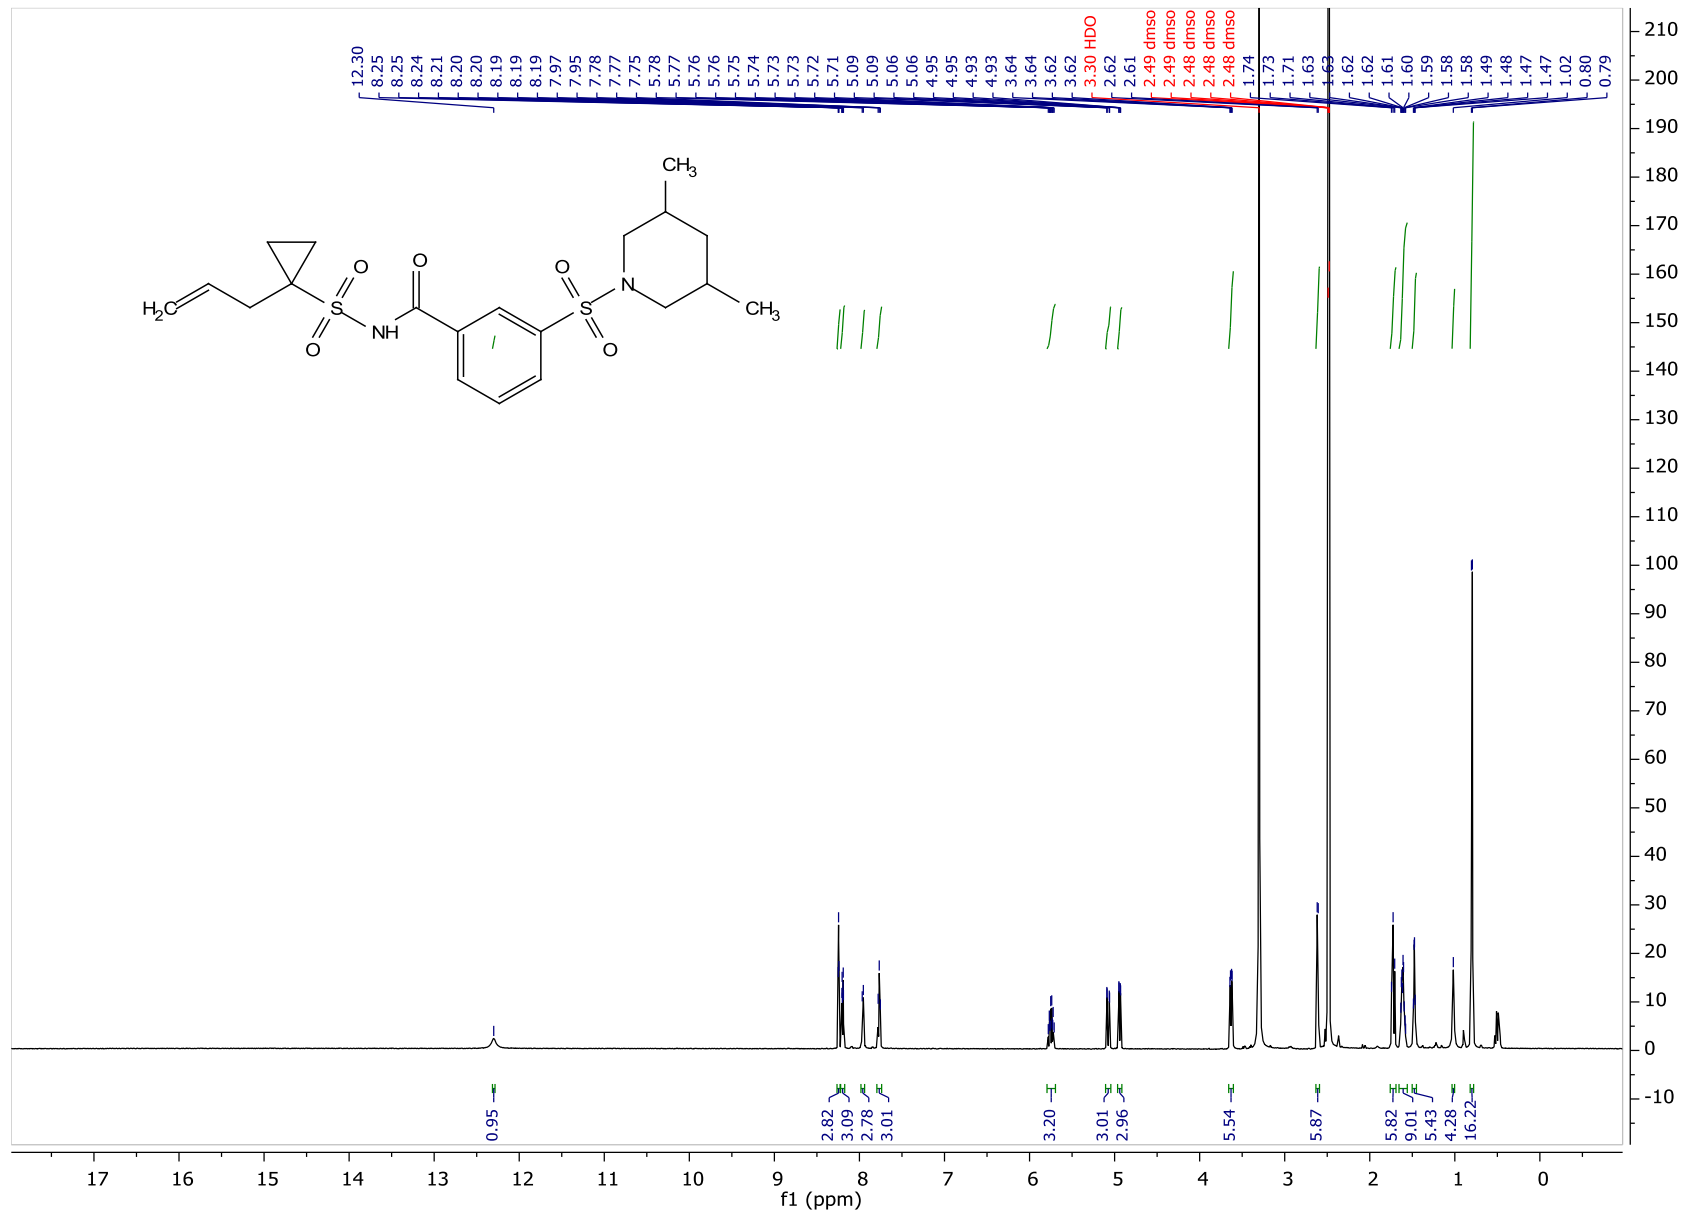

<sup>13</sup>C NMR spectrum of Z2175374182

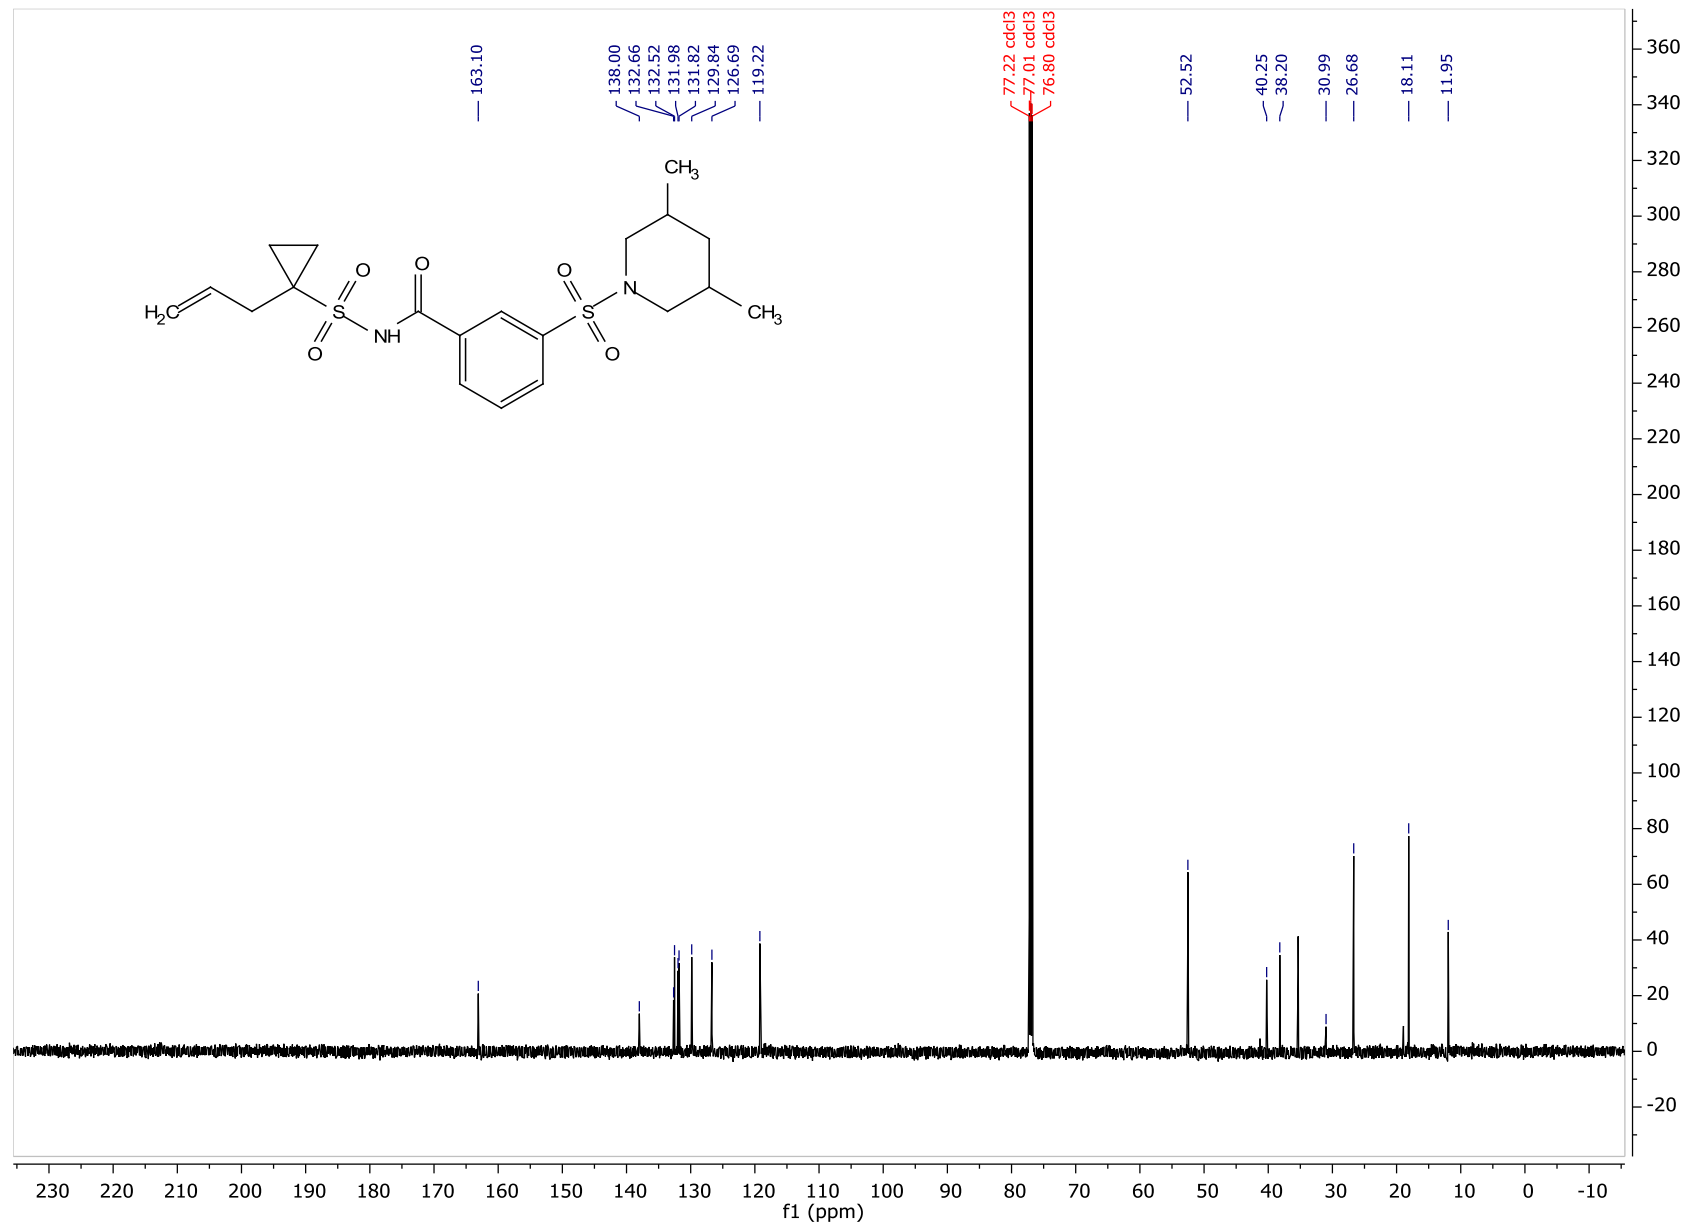

LC/MS spectrum of Z2175374182

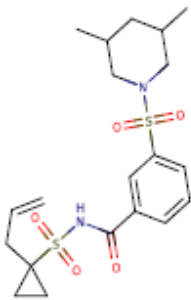

Mol Wt 440.58  
 Exact Mass 440.17

| # | Time  | Area%  |
|---|-------|--------|
| 1 | 1.418 | 100.00 |

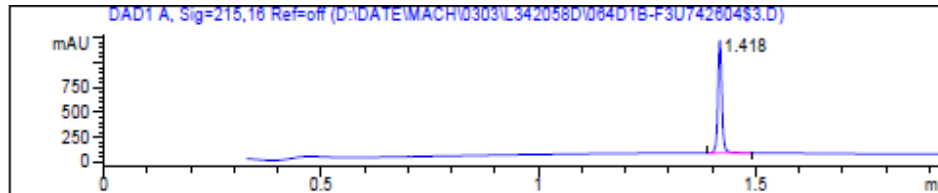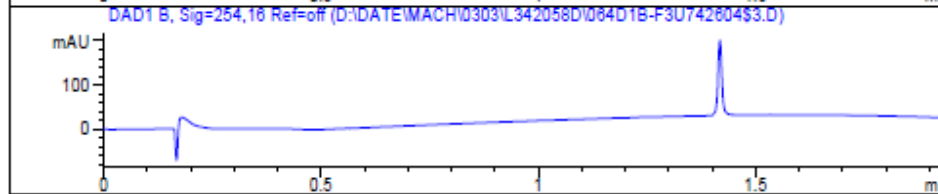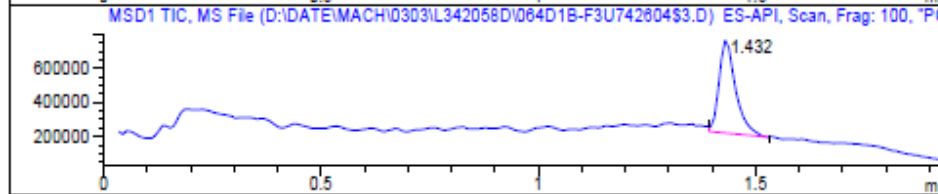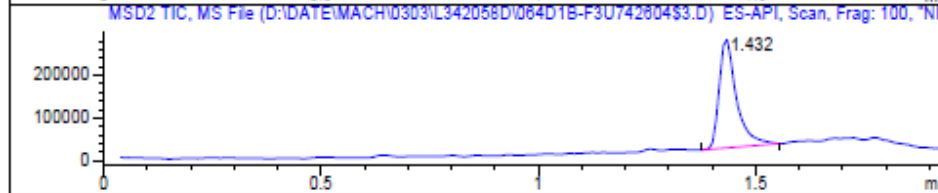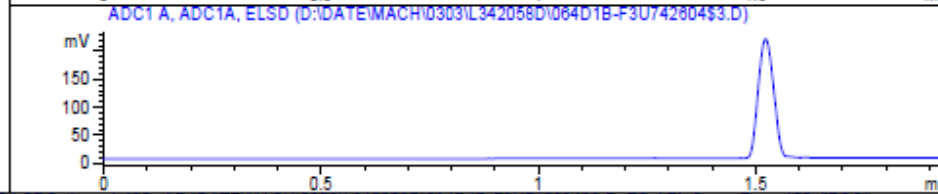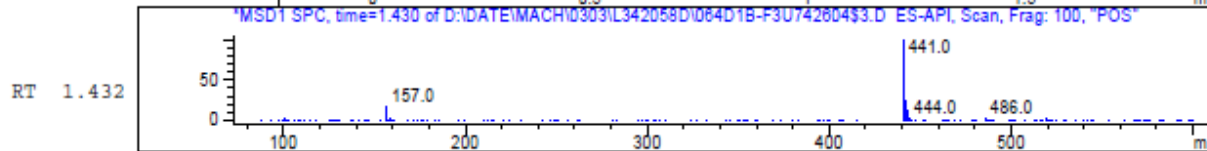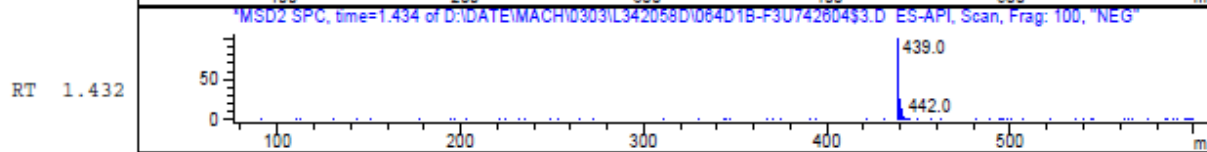

<sup>1</sup>H NMR spectrum of Z2175381372

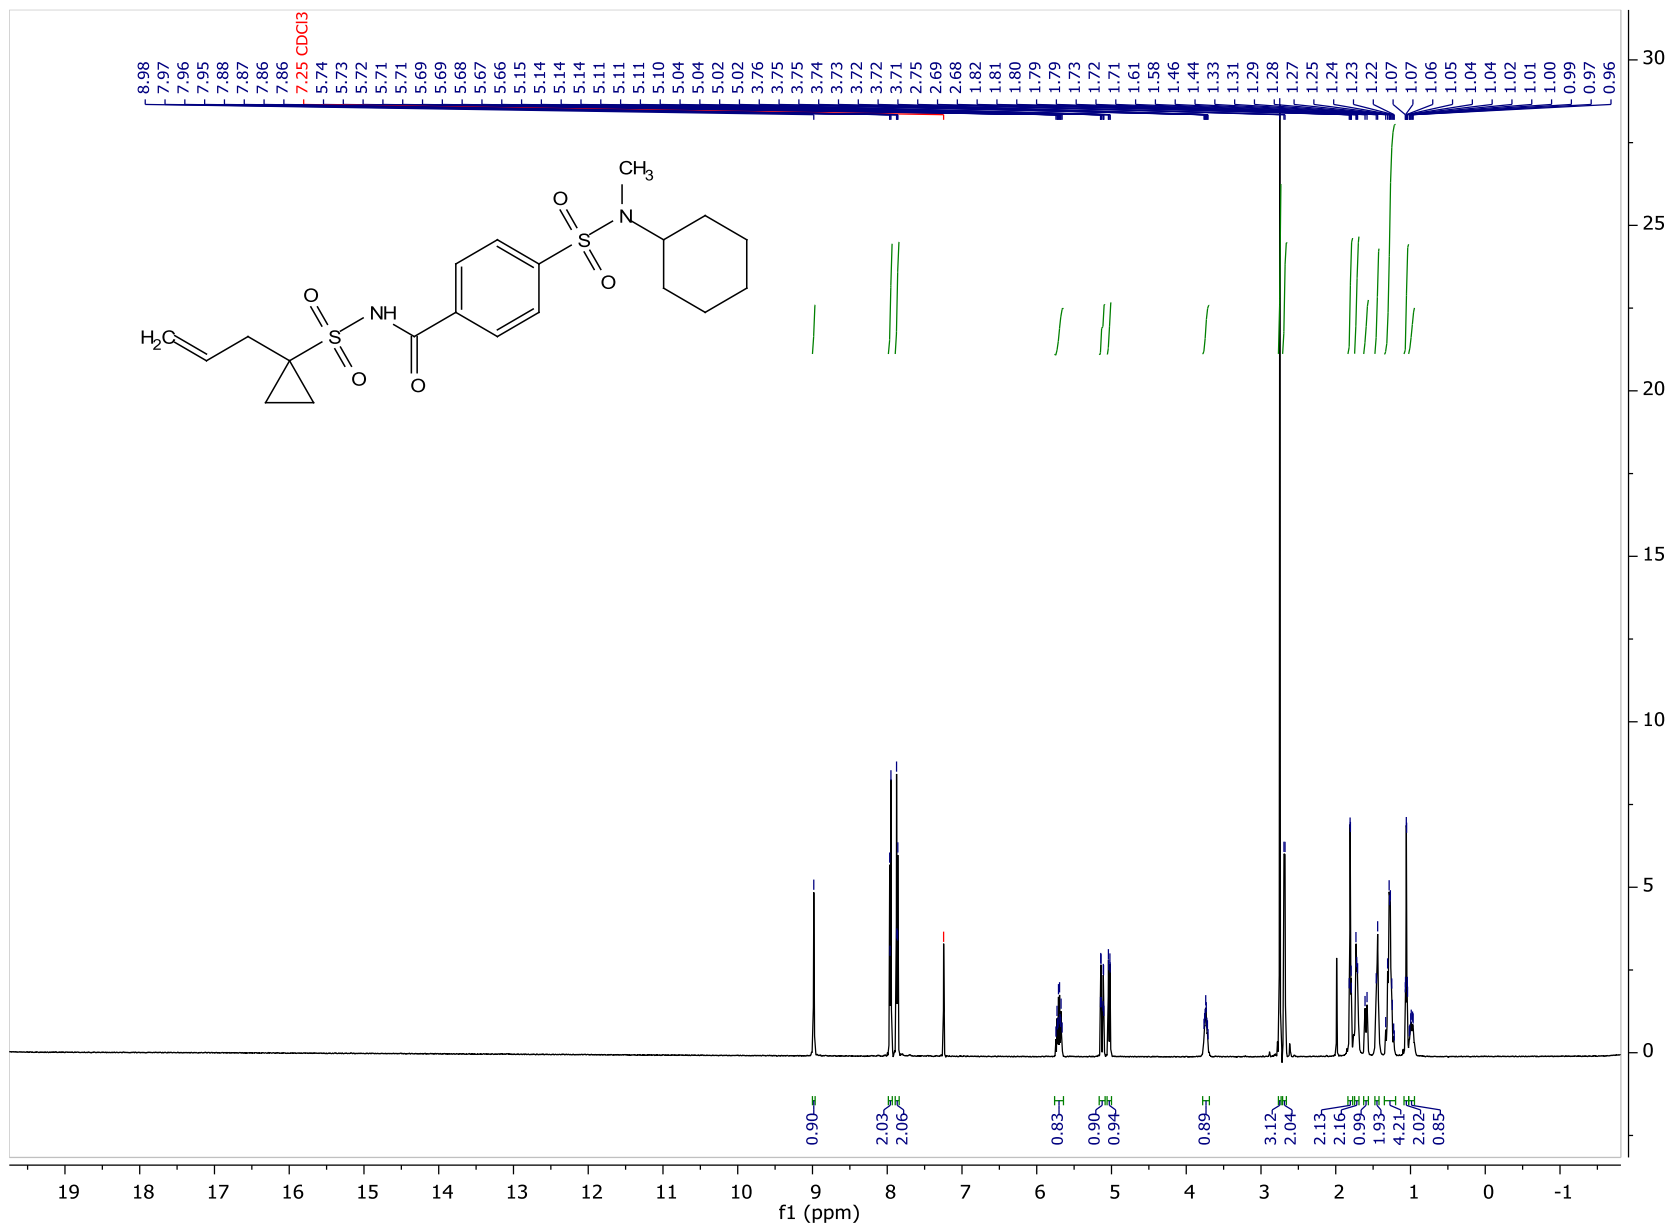

<sup>13</sup>C NMR spectrum of Z2175381372

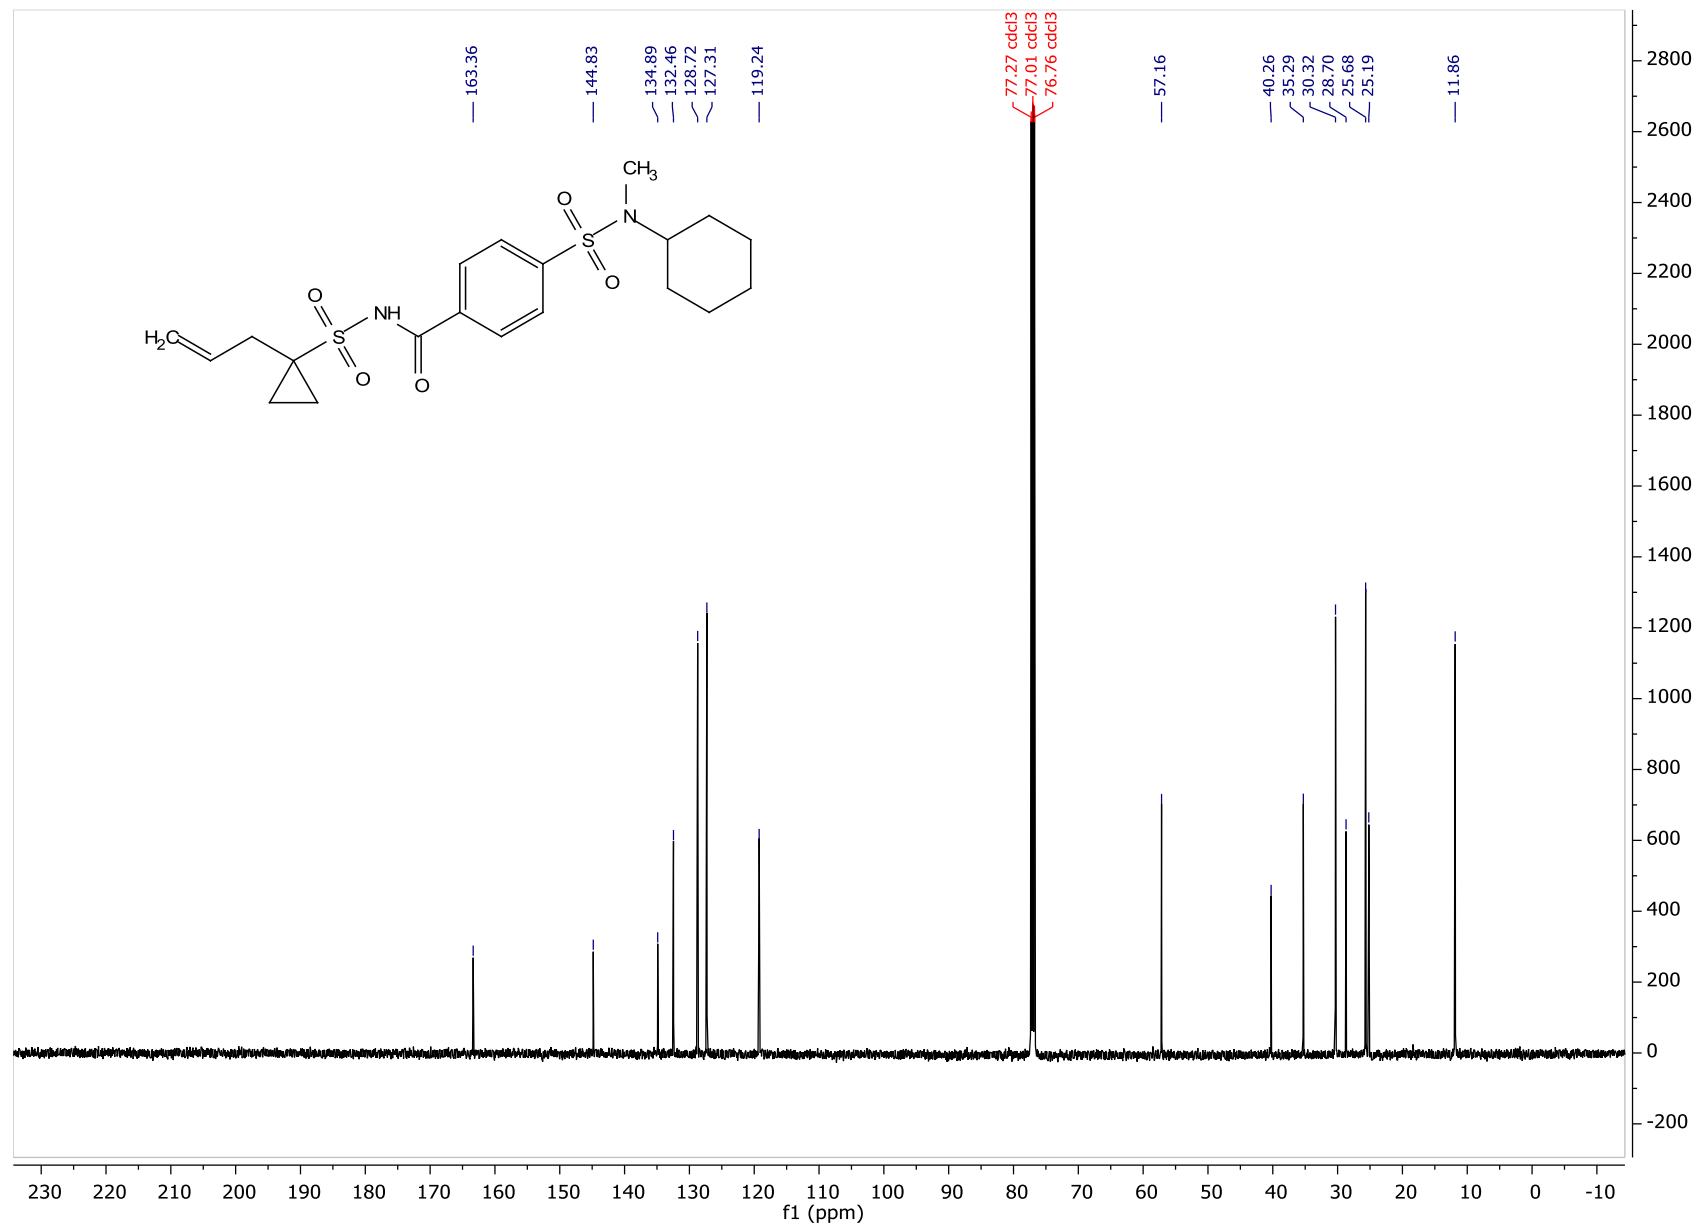

LC/MS spectrum of Z2175381372

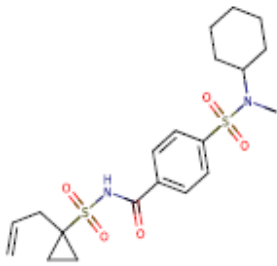

Mol Wt 440.58  
Exact Mass 440.17

| # | Time  | Area% |
|---|-------|-------|
| 1 | 1.339 | 1.92  |
| 2 | 1.395 | 98.08 |

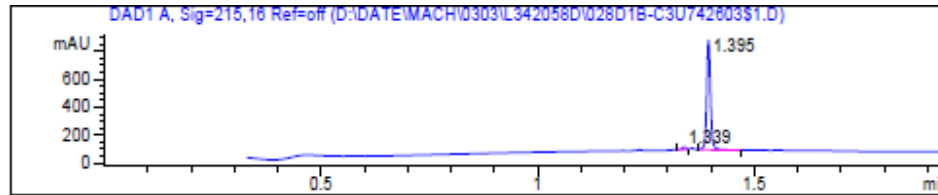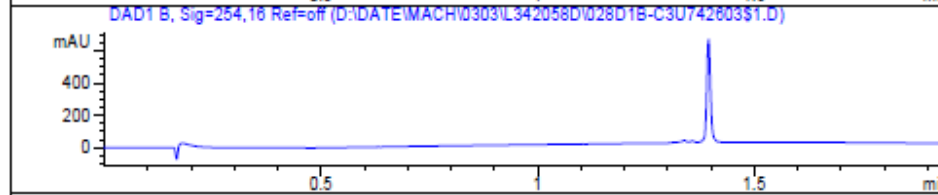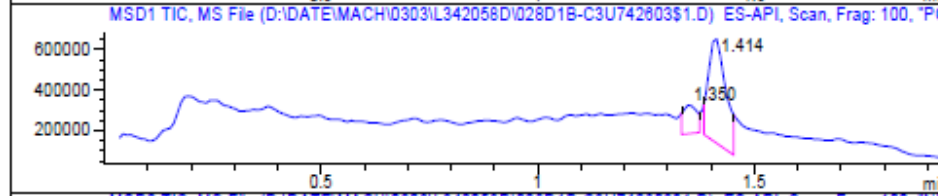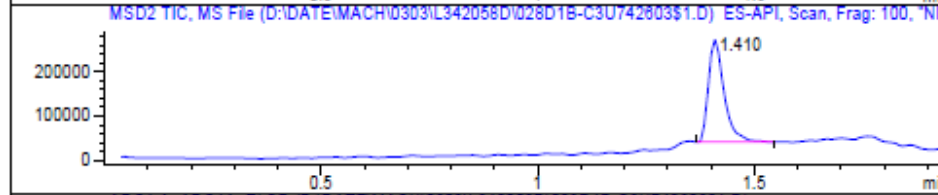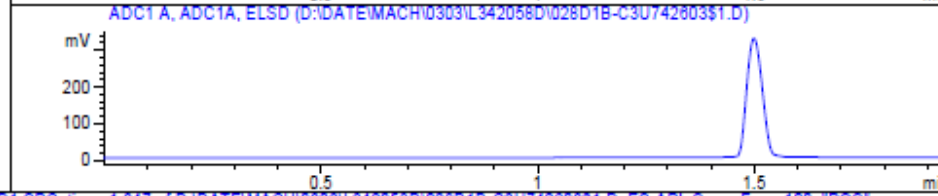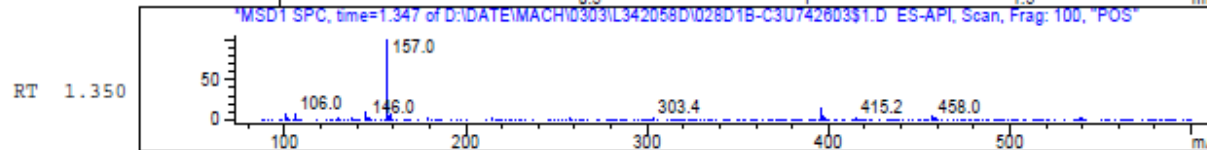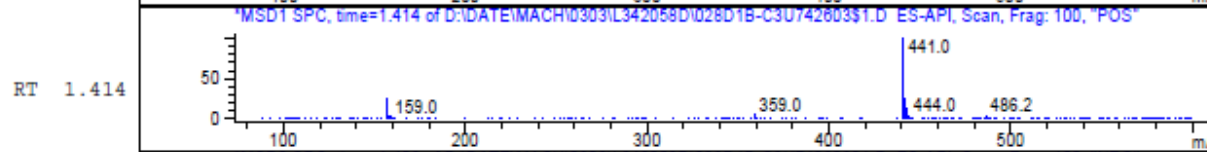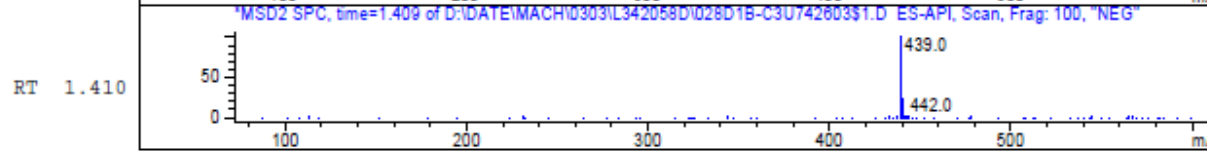

<sup>1</sup>H NMR spectrum of Z2175381493

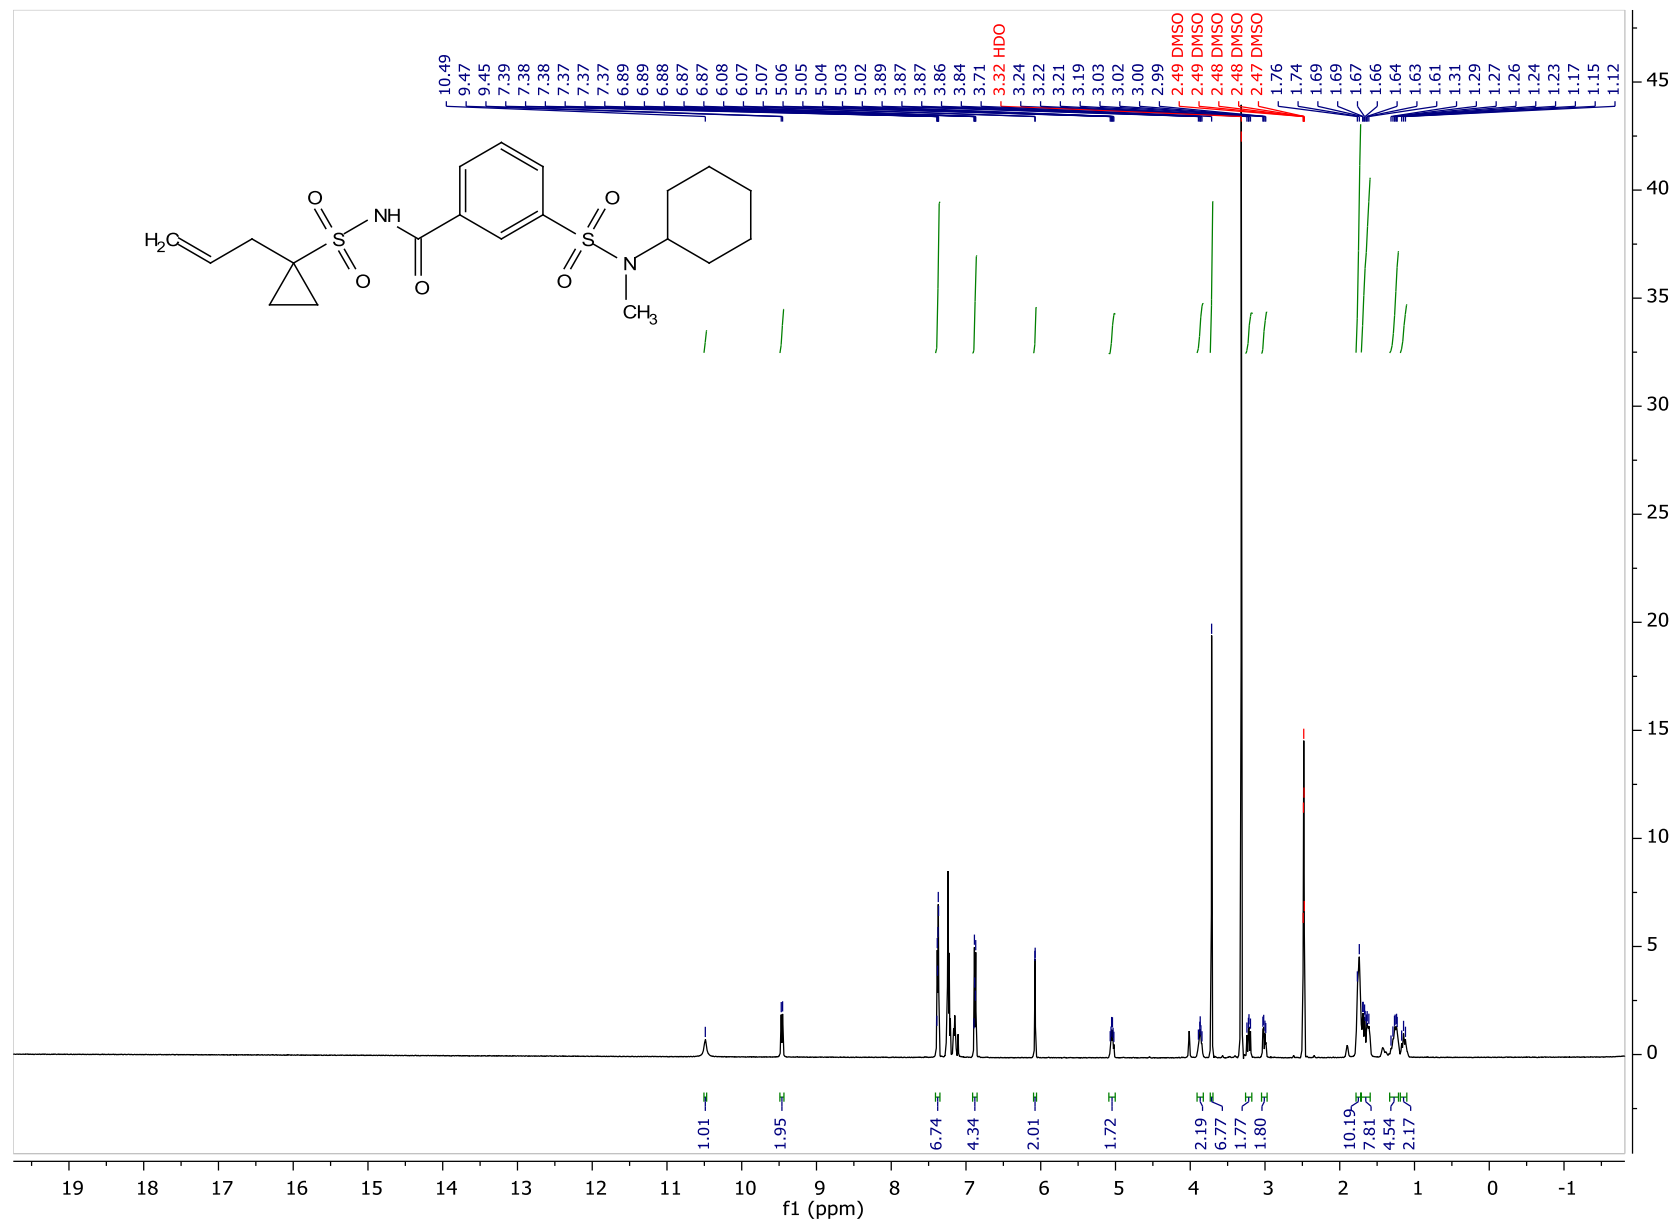



<sup>13</sup>C NMR spectrum of Z2175381493

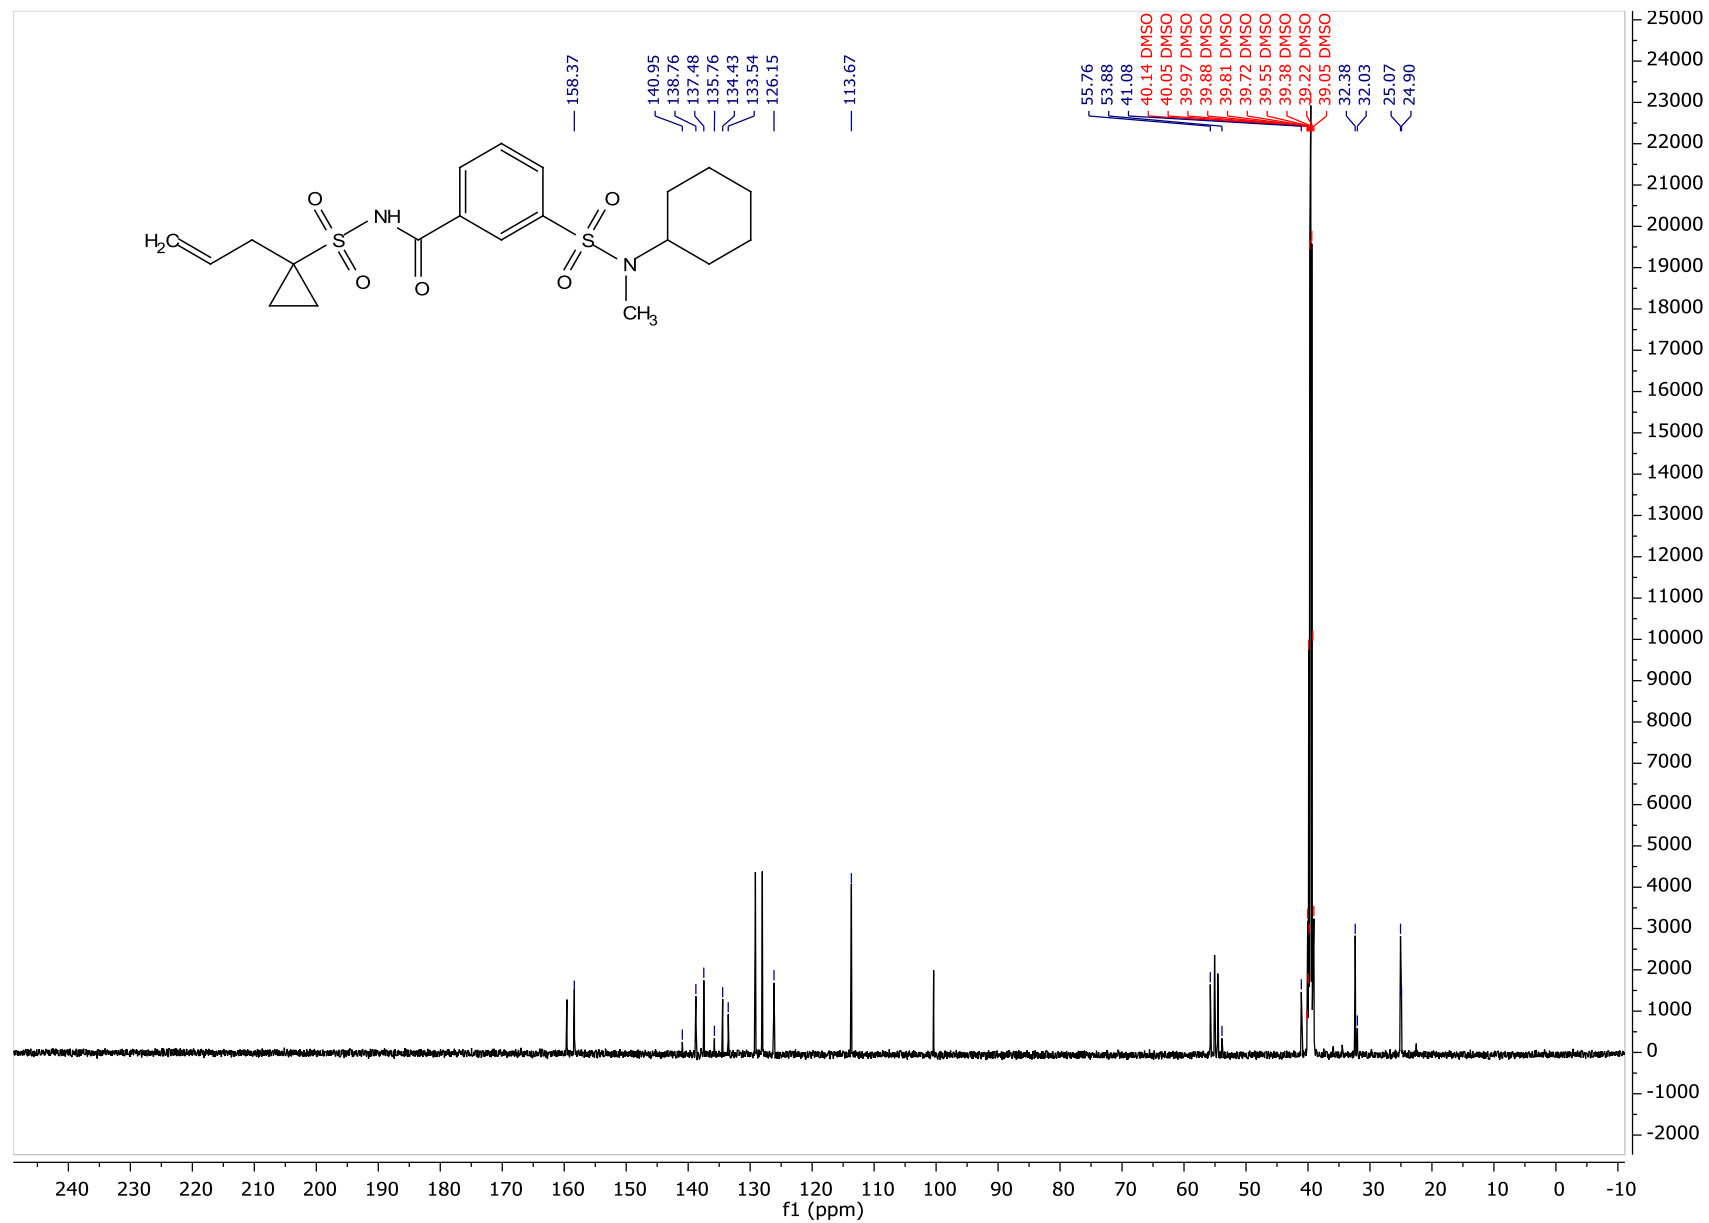

LC/MS spectrum of Z2175381493

Ret\_Time: 1.511 min

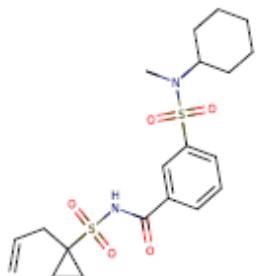

Mol Wt 440.58  
Exact Mass 440.17

| # | Time  | Area% |
|---|-------|-------|
| 1 | 1.359 | 2.53  |
| 2 | 1.511 | 95.82 |
| 3 | 1.563 | 1.64  |

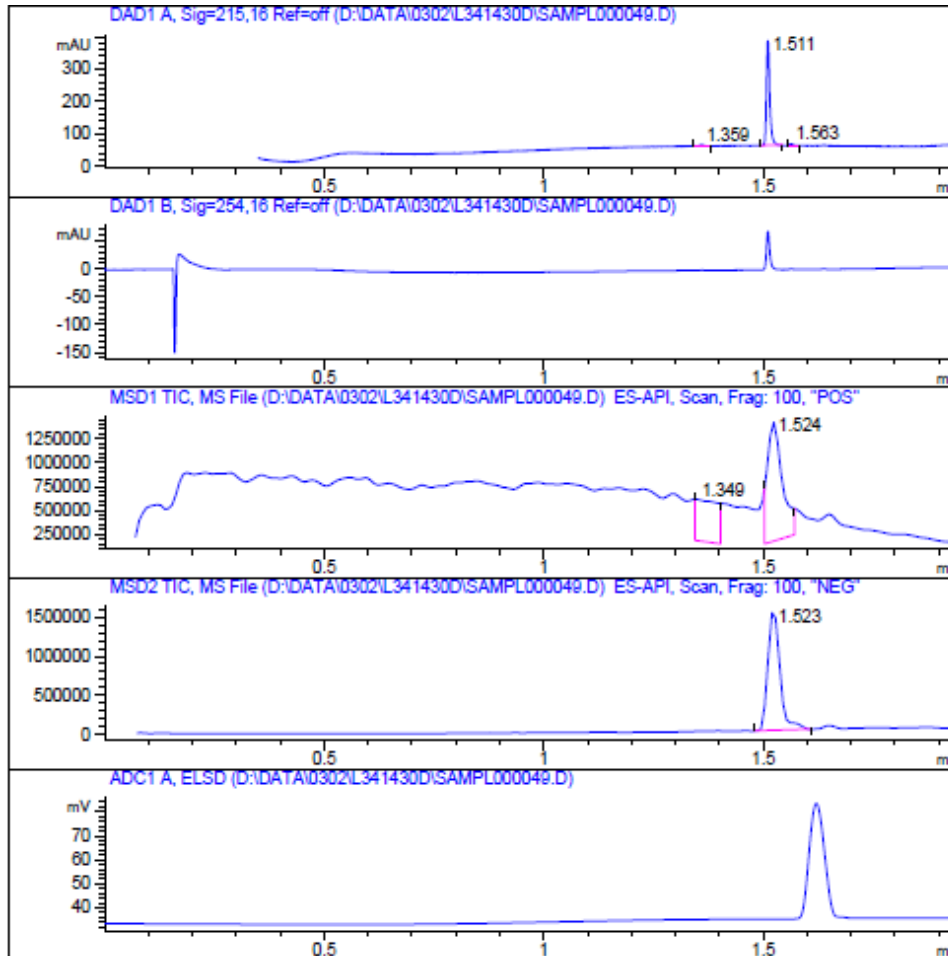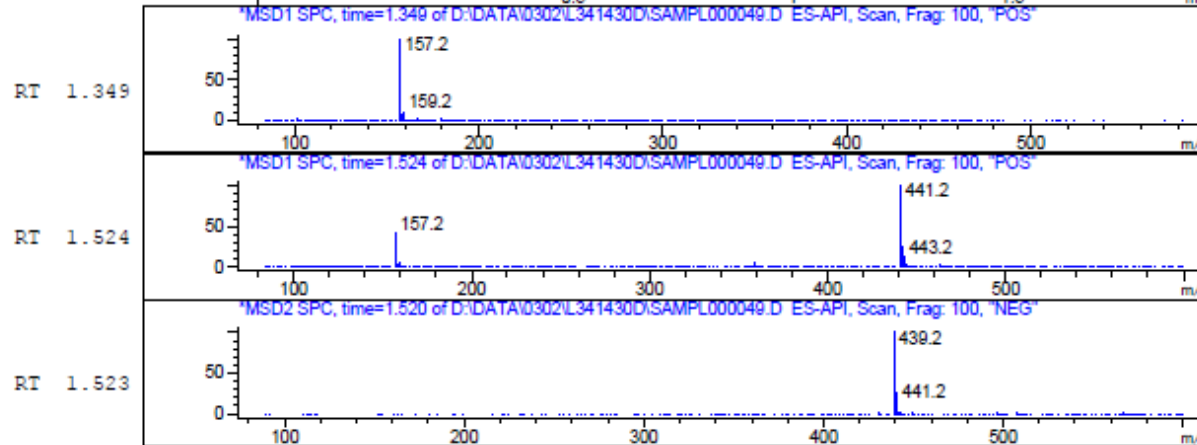

<sup>1</sup>H NMR spectrum of Z222188954

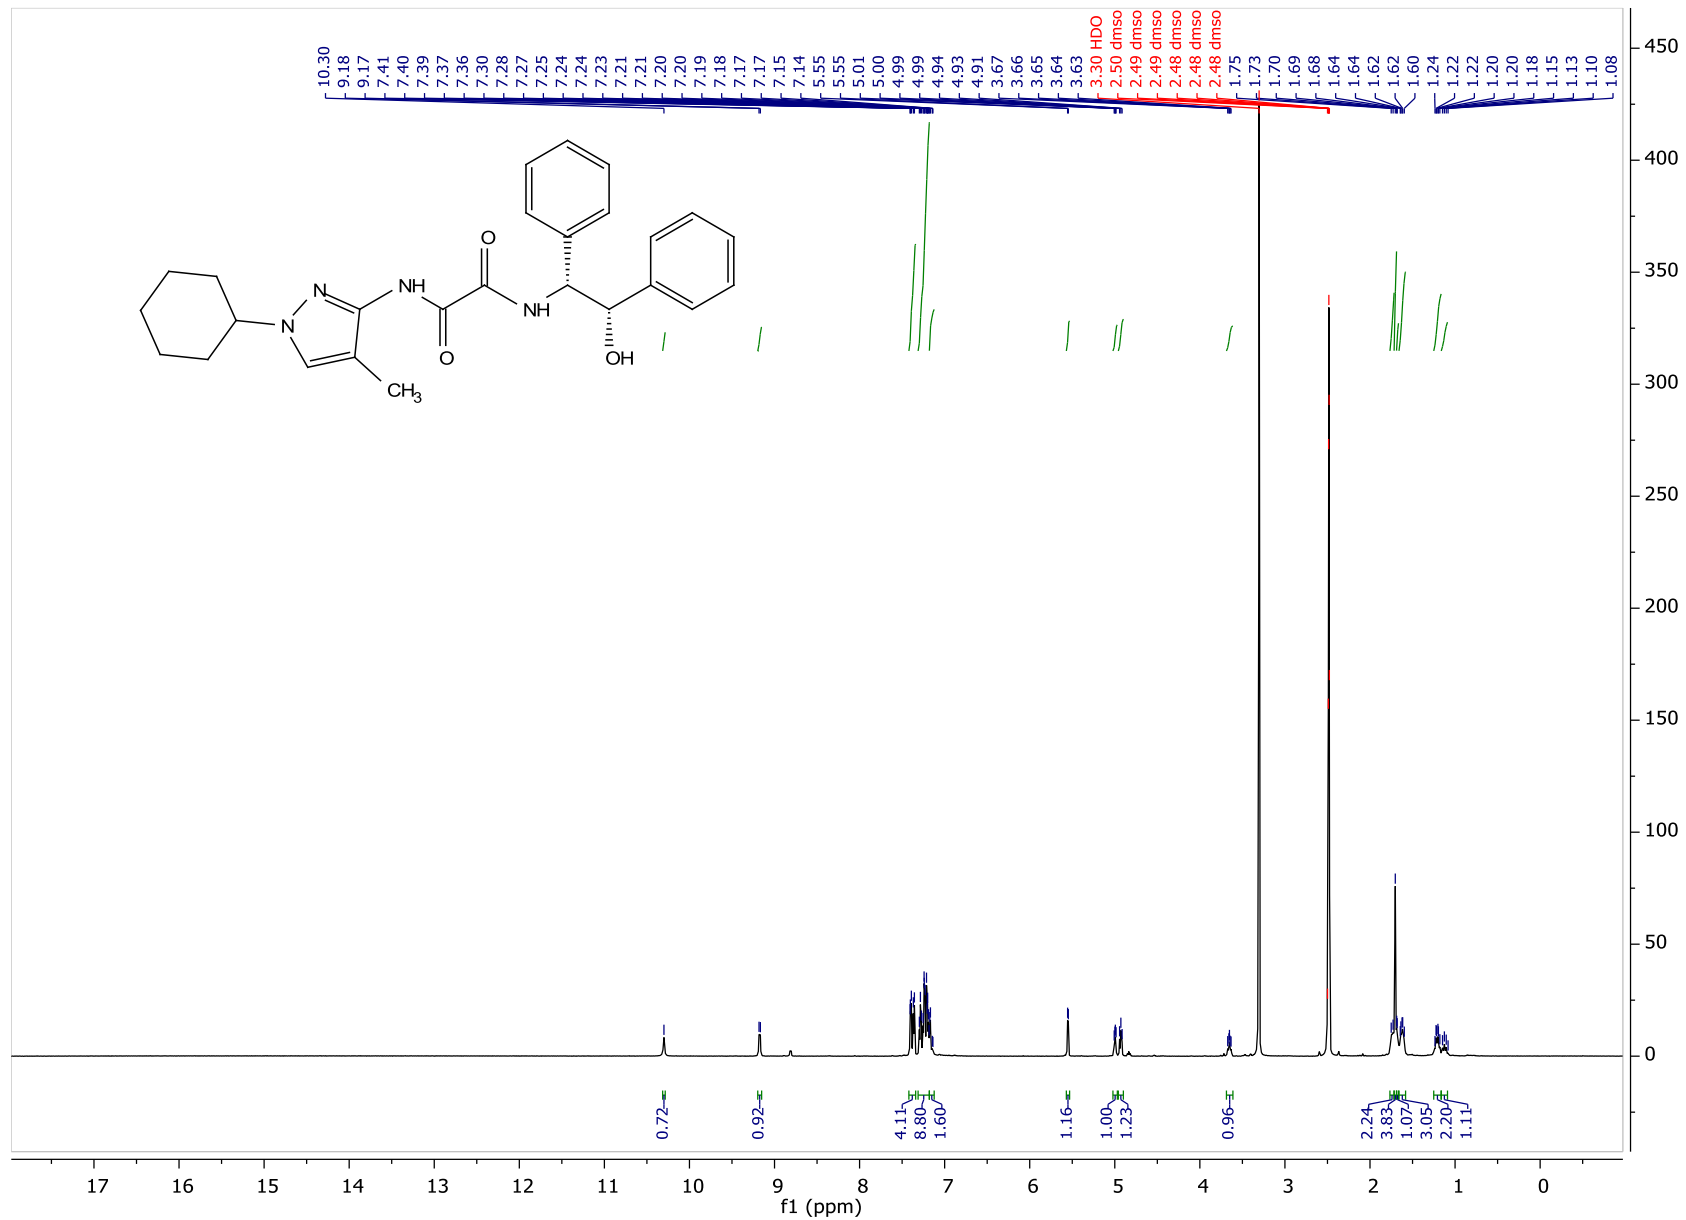

LC/MS spectrum of Z2221889954

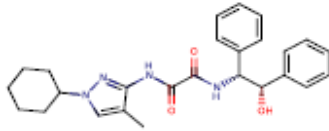

Mol Wt 446.54  
 Exact Mass 446.27

| # | Time  | Area%  |
|---|-------|--------|
| 1 | 1.296 | 100.00 |

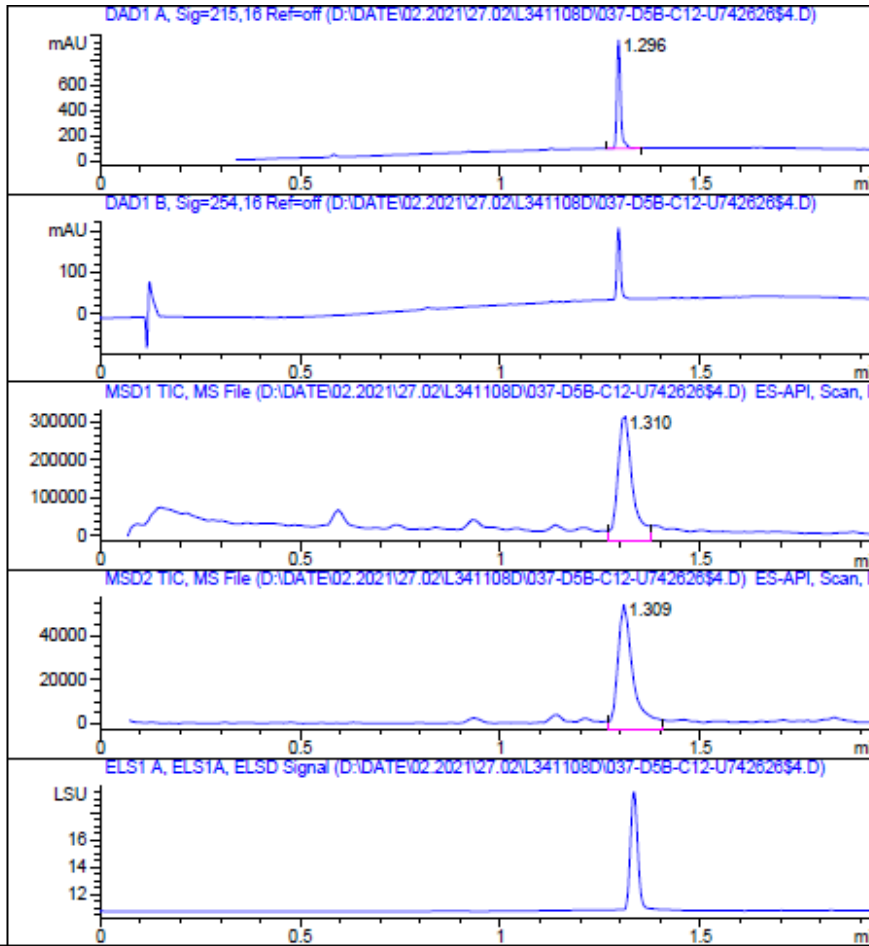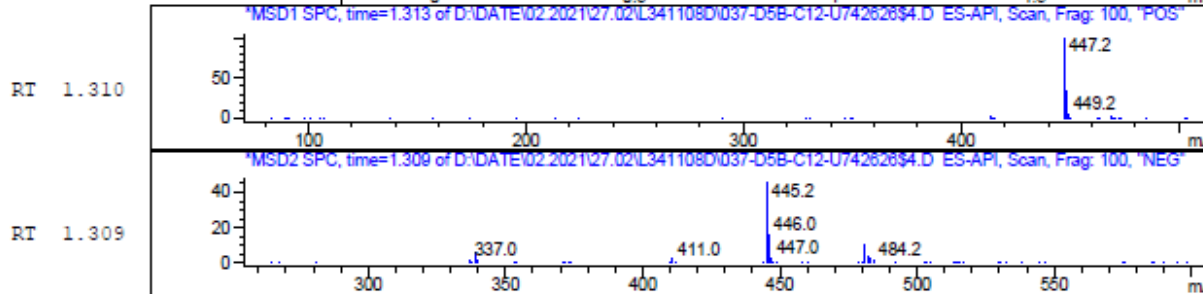

<sup>1</sup>H NMR spectrum of Z2221890363

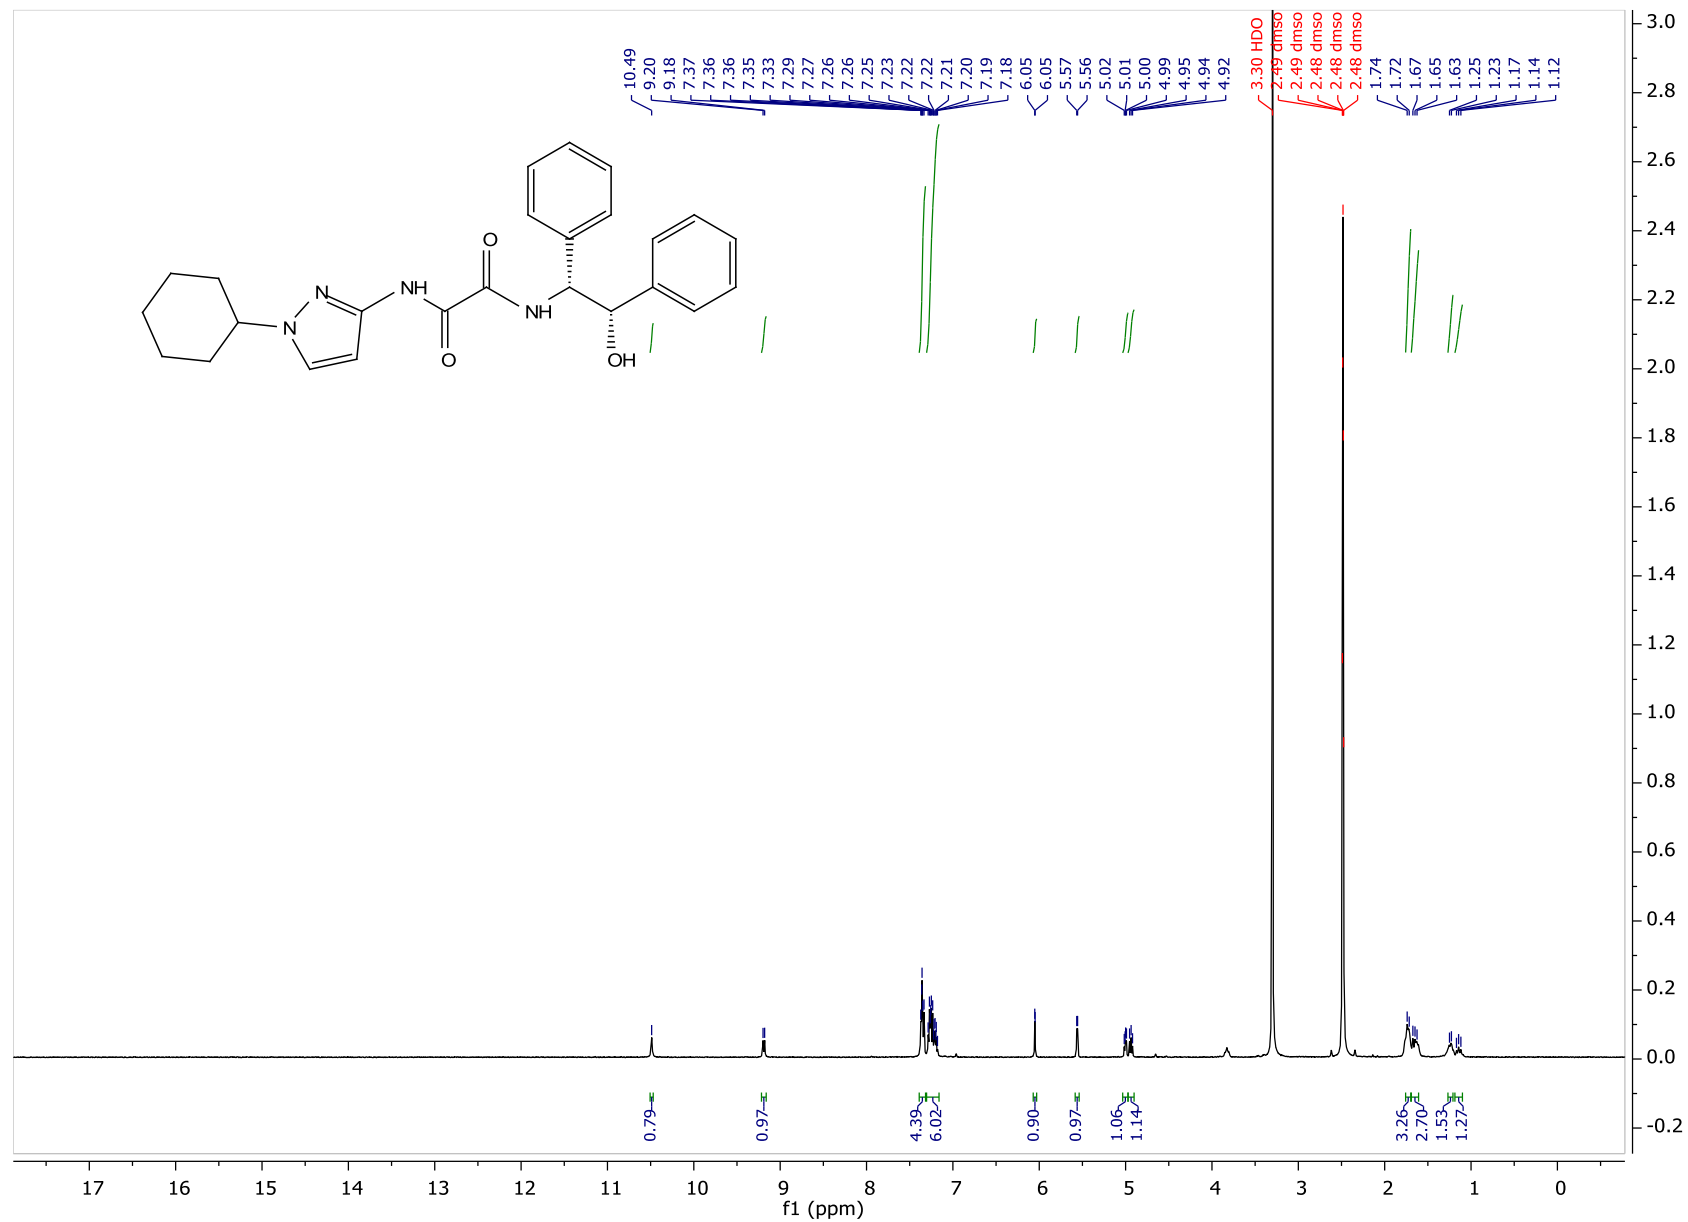

LC/MS spectrum of Z2221890363

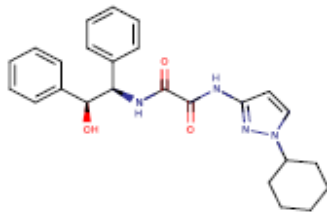

Mol Wt 432.52  
Exact Mass 432.25

| # | Time  | Area% |
|---|-------|-------|
| 1 | 0.995 | 1.52  |
| 2 | 1.266 | 98.48 |

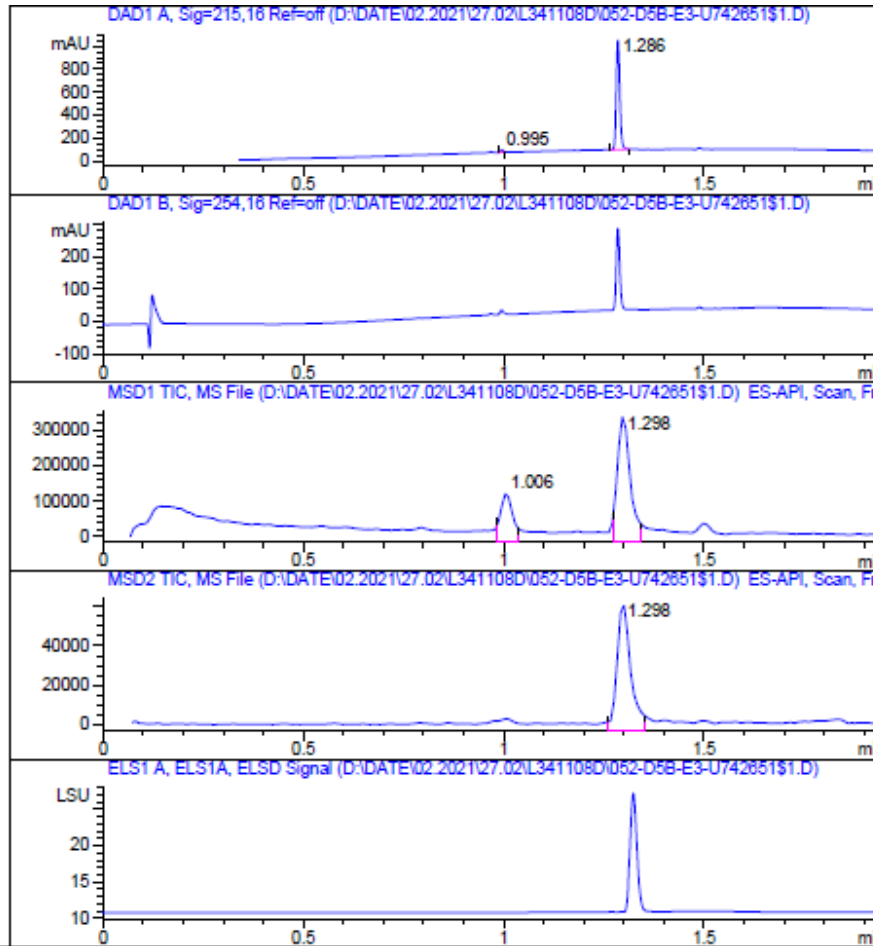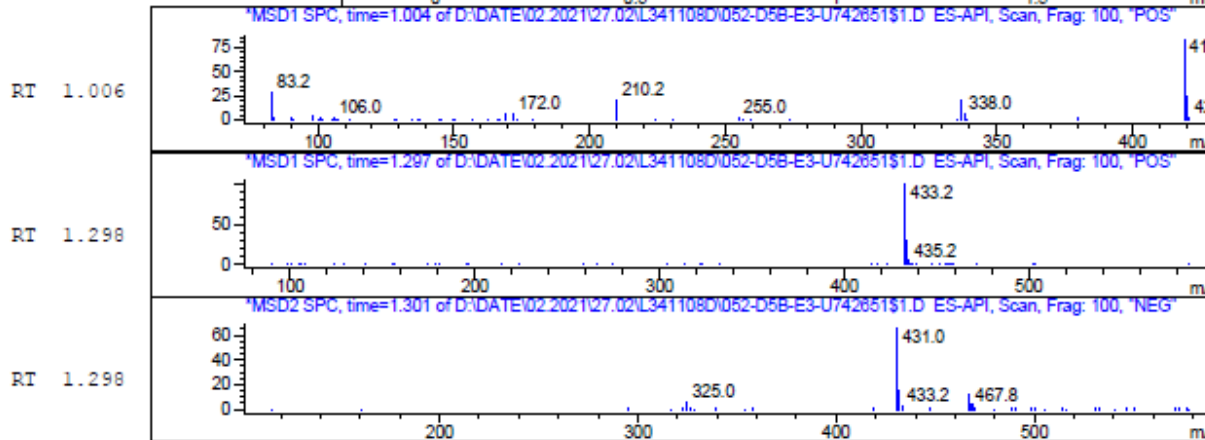

<sup>1</sup>H NMR spectrum of Z4121492321

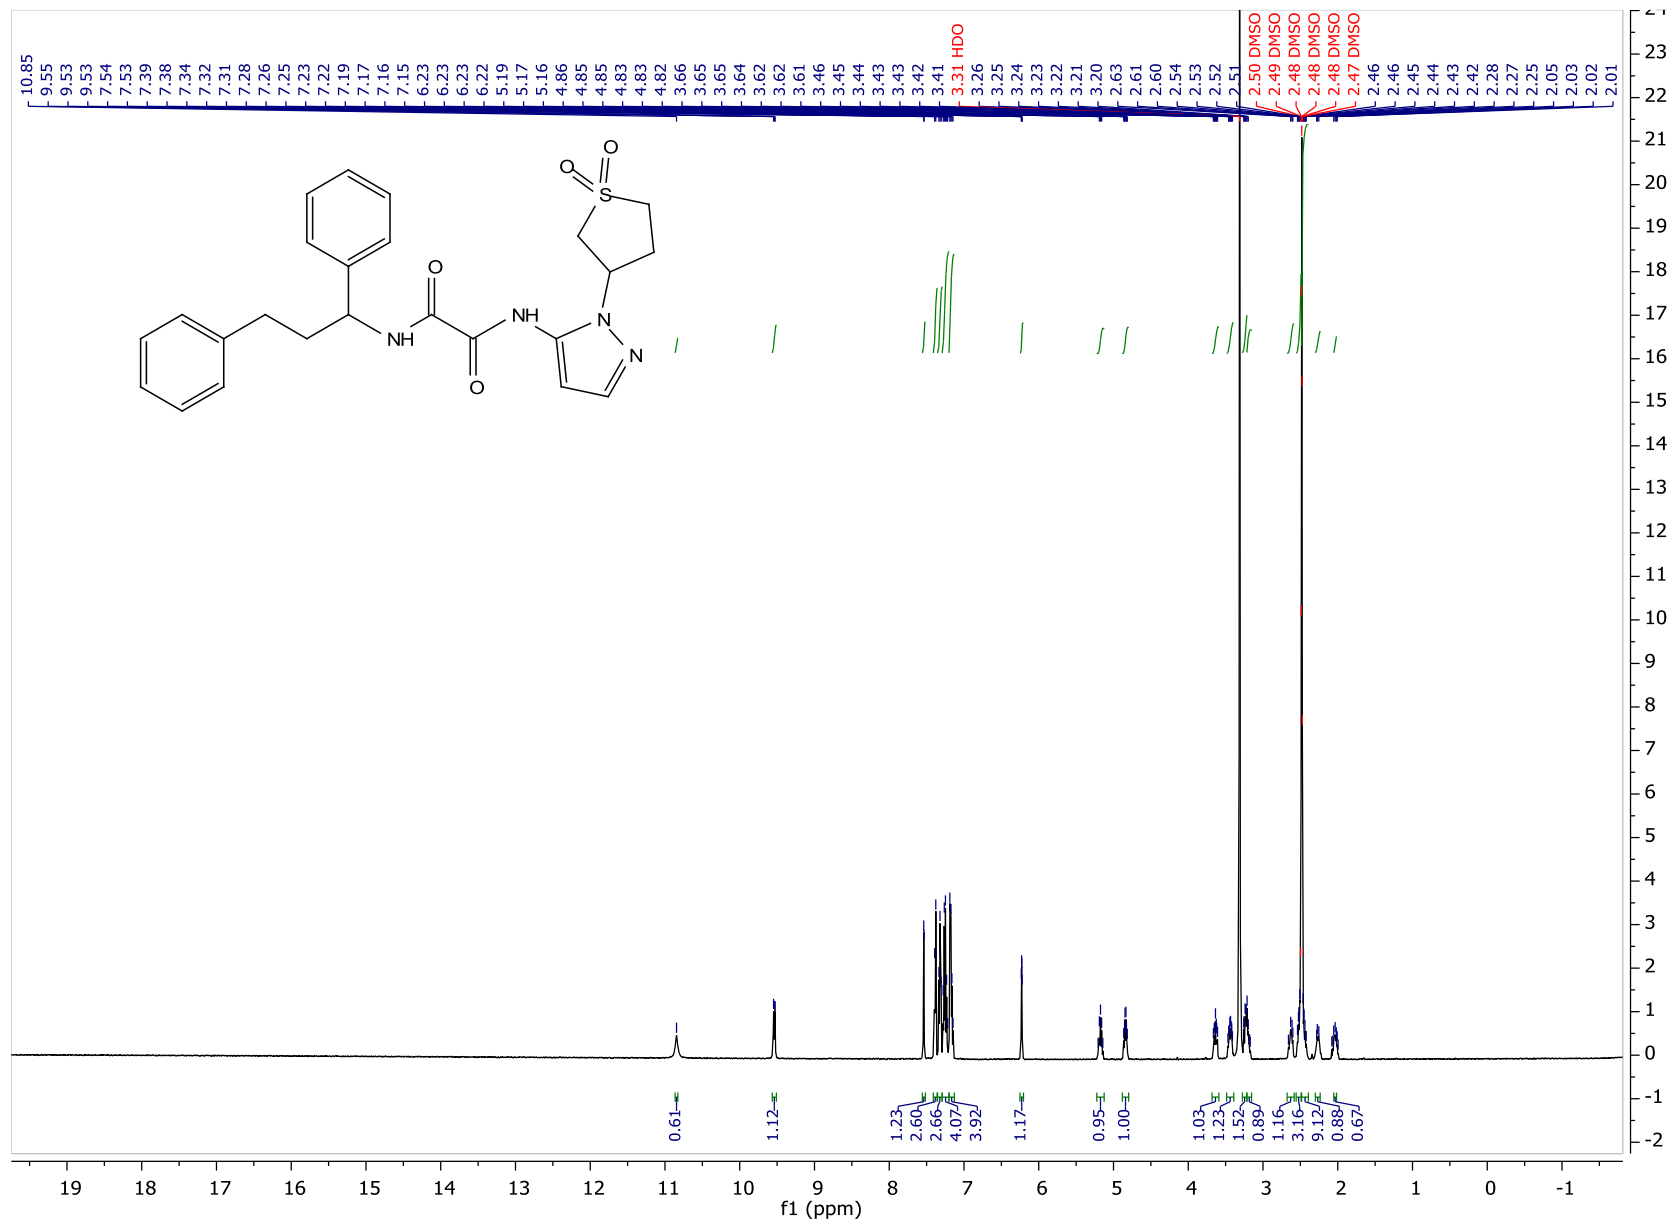

<sup>13</sup>C NMR spectrum of Z4121492321

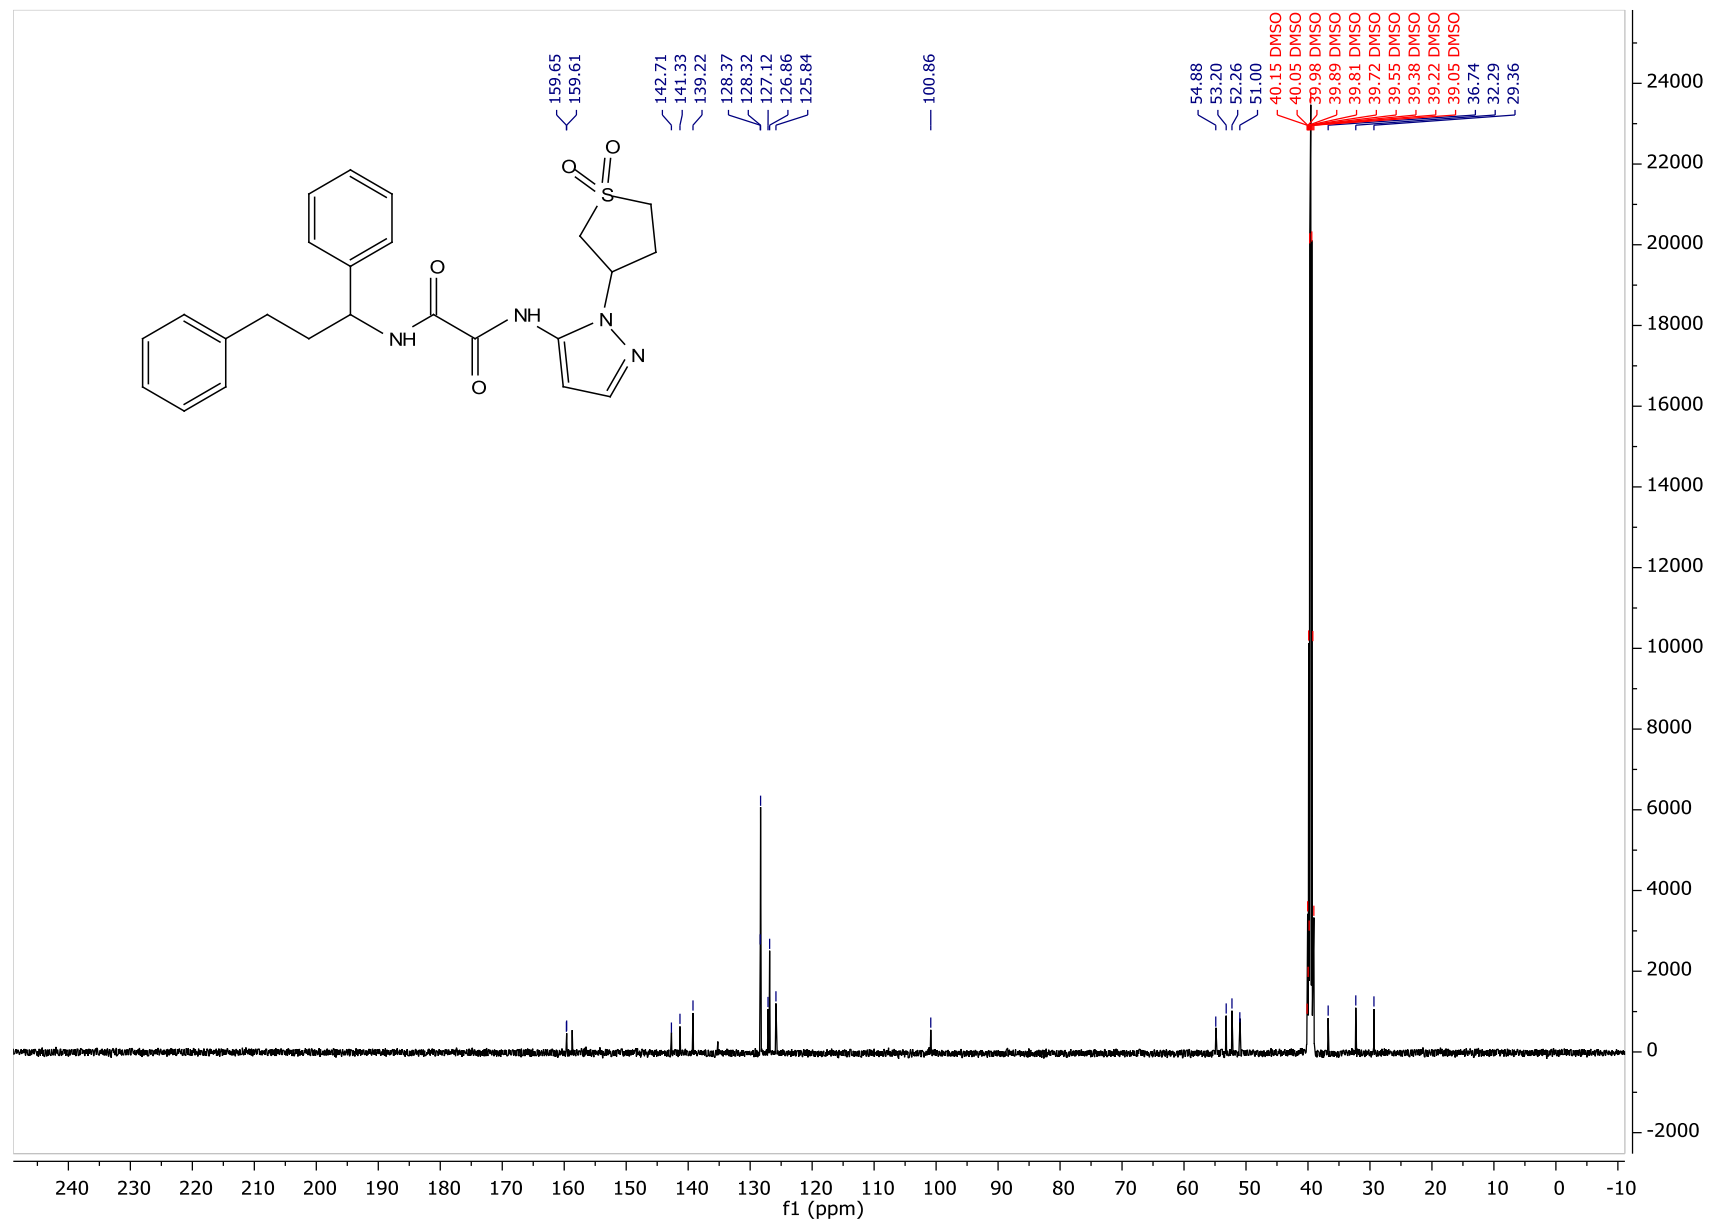



LC/MS spectrum of Z4121492321

Ret\_Time: 1.410 min

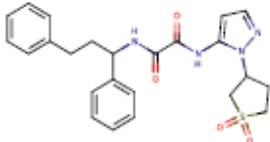

Mol Wt 466.55  
Exact Mass 466.19

| # | Time  | Area%  |
|---|-------|--------|
| 1 | 1.410 | 100.00 |

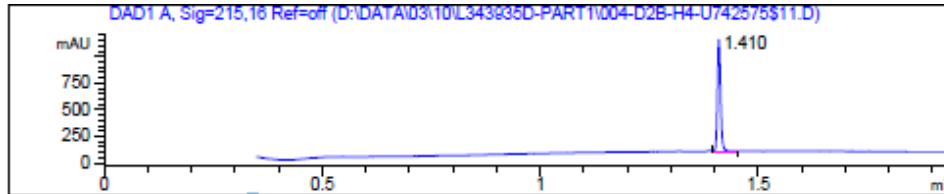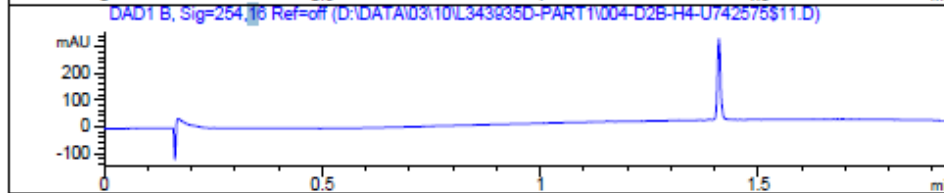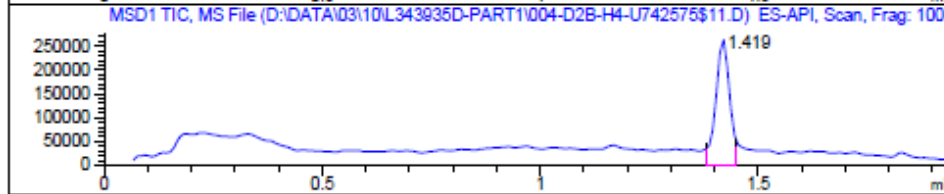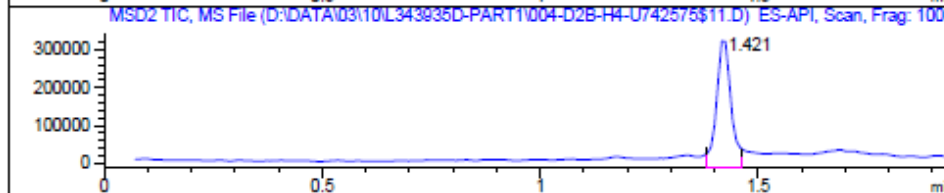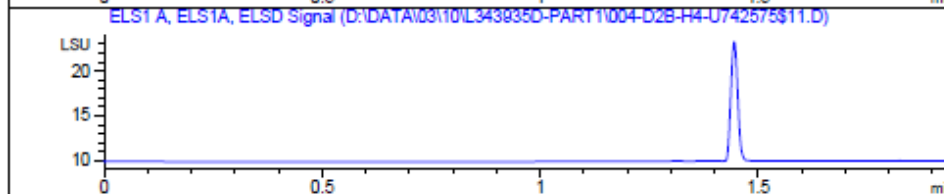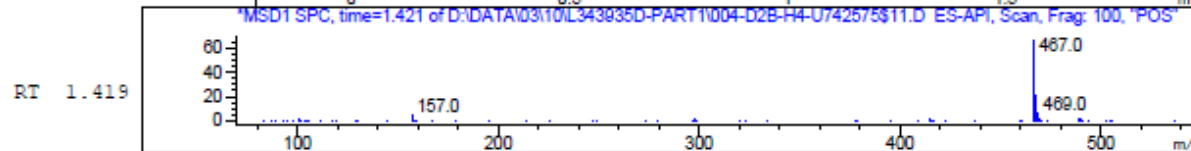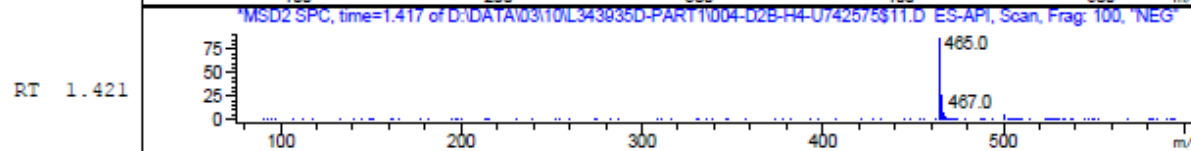

<sup>1</sup>H NMR spectrum of Z4121492356

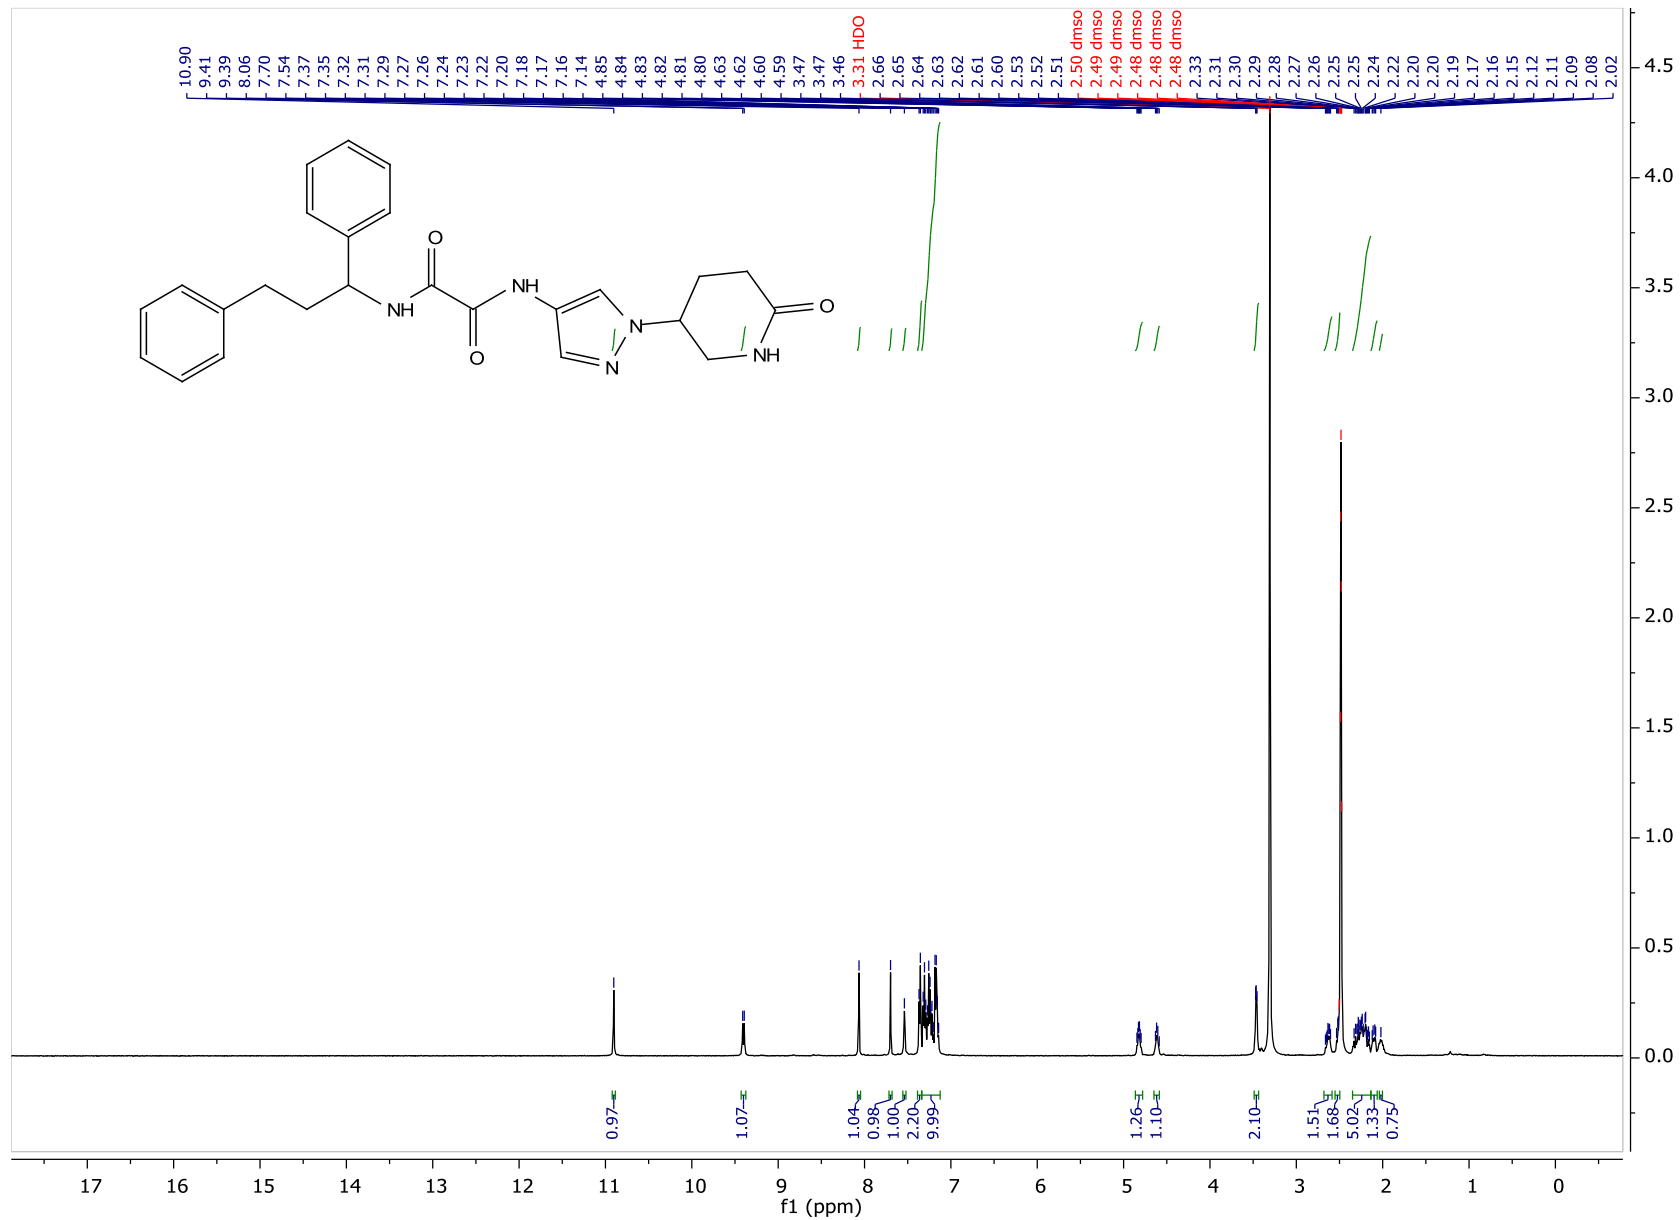

LC/MS spectrum of Z4121492356

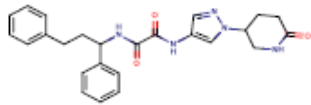

Mol Wt 445.51  
Exact Mass 445.24

| # | Time  | Area% |
|---|-------|-------|
| 1 | 1.143 | 2.37  |
| 2 | 1.190 | 6.14  |
| 3 | 1.208 | 91.49 |

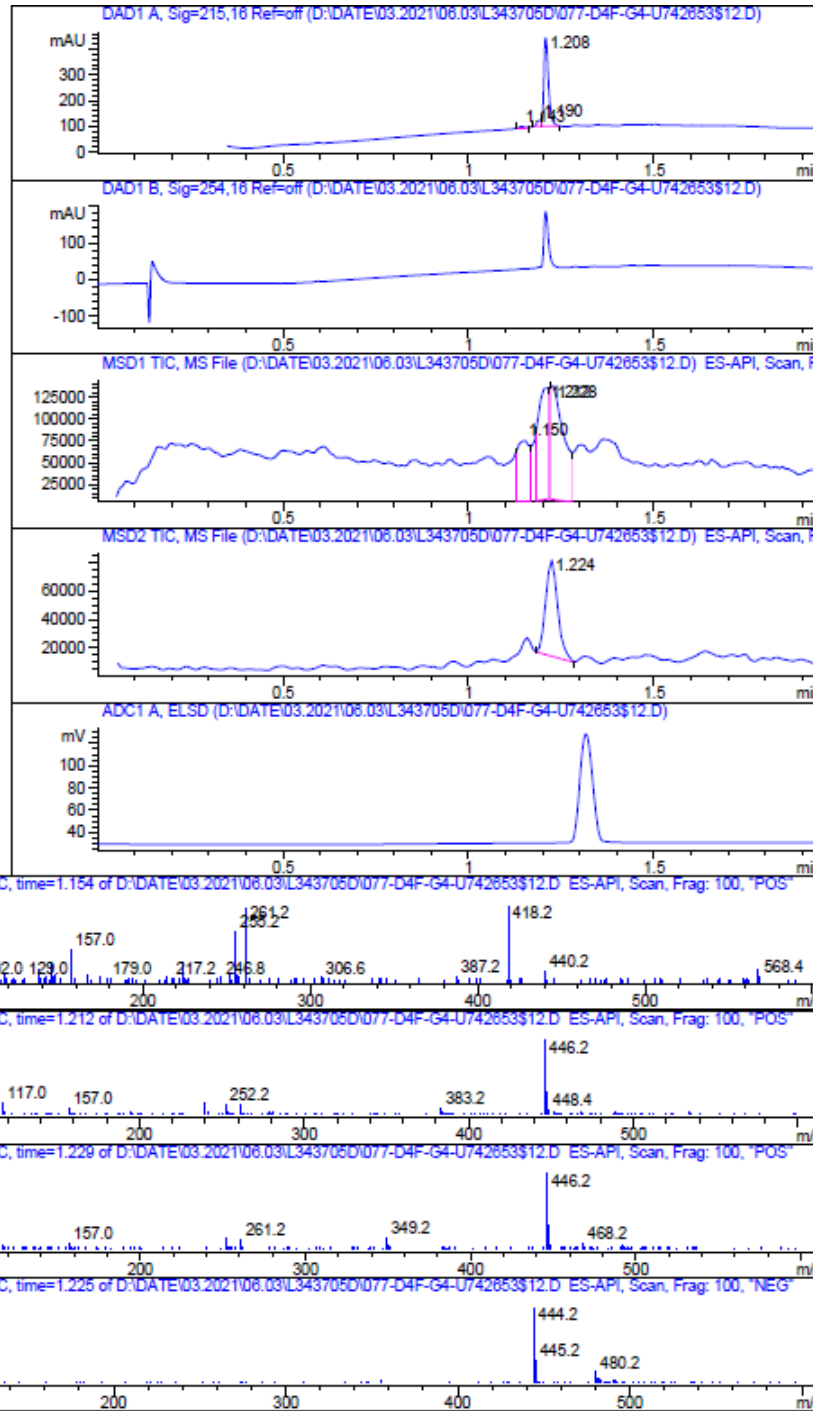

<sup>1</sup>H NMR spectrum of Z4886816116

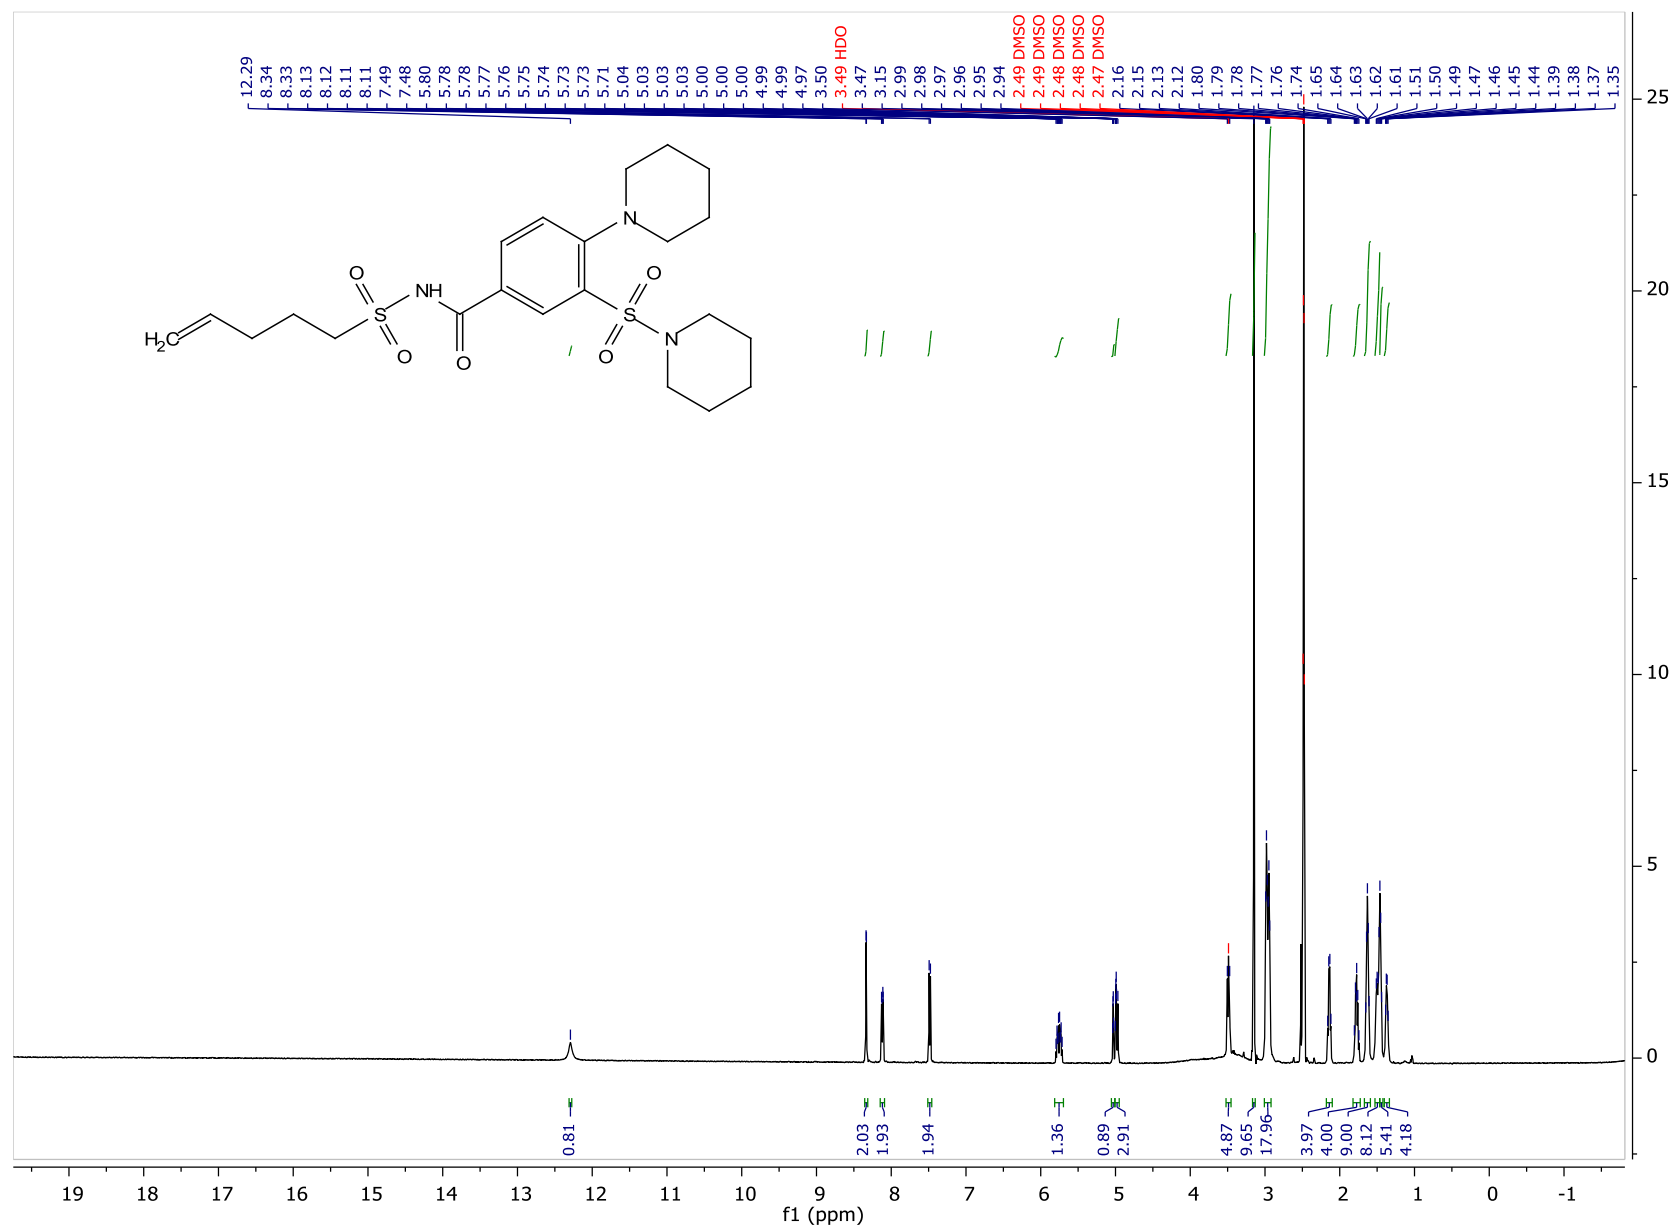

<sup>13</sup>C NMR spectrum of Z4886816116

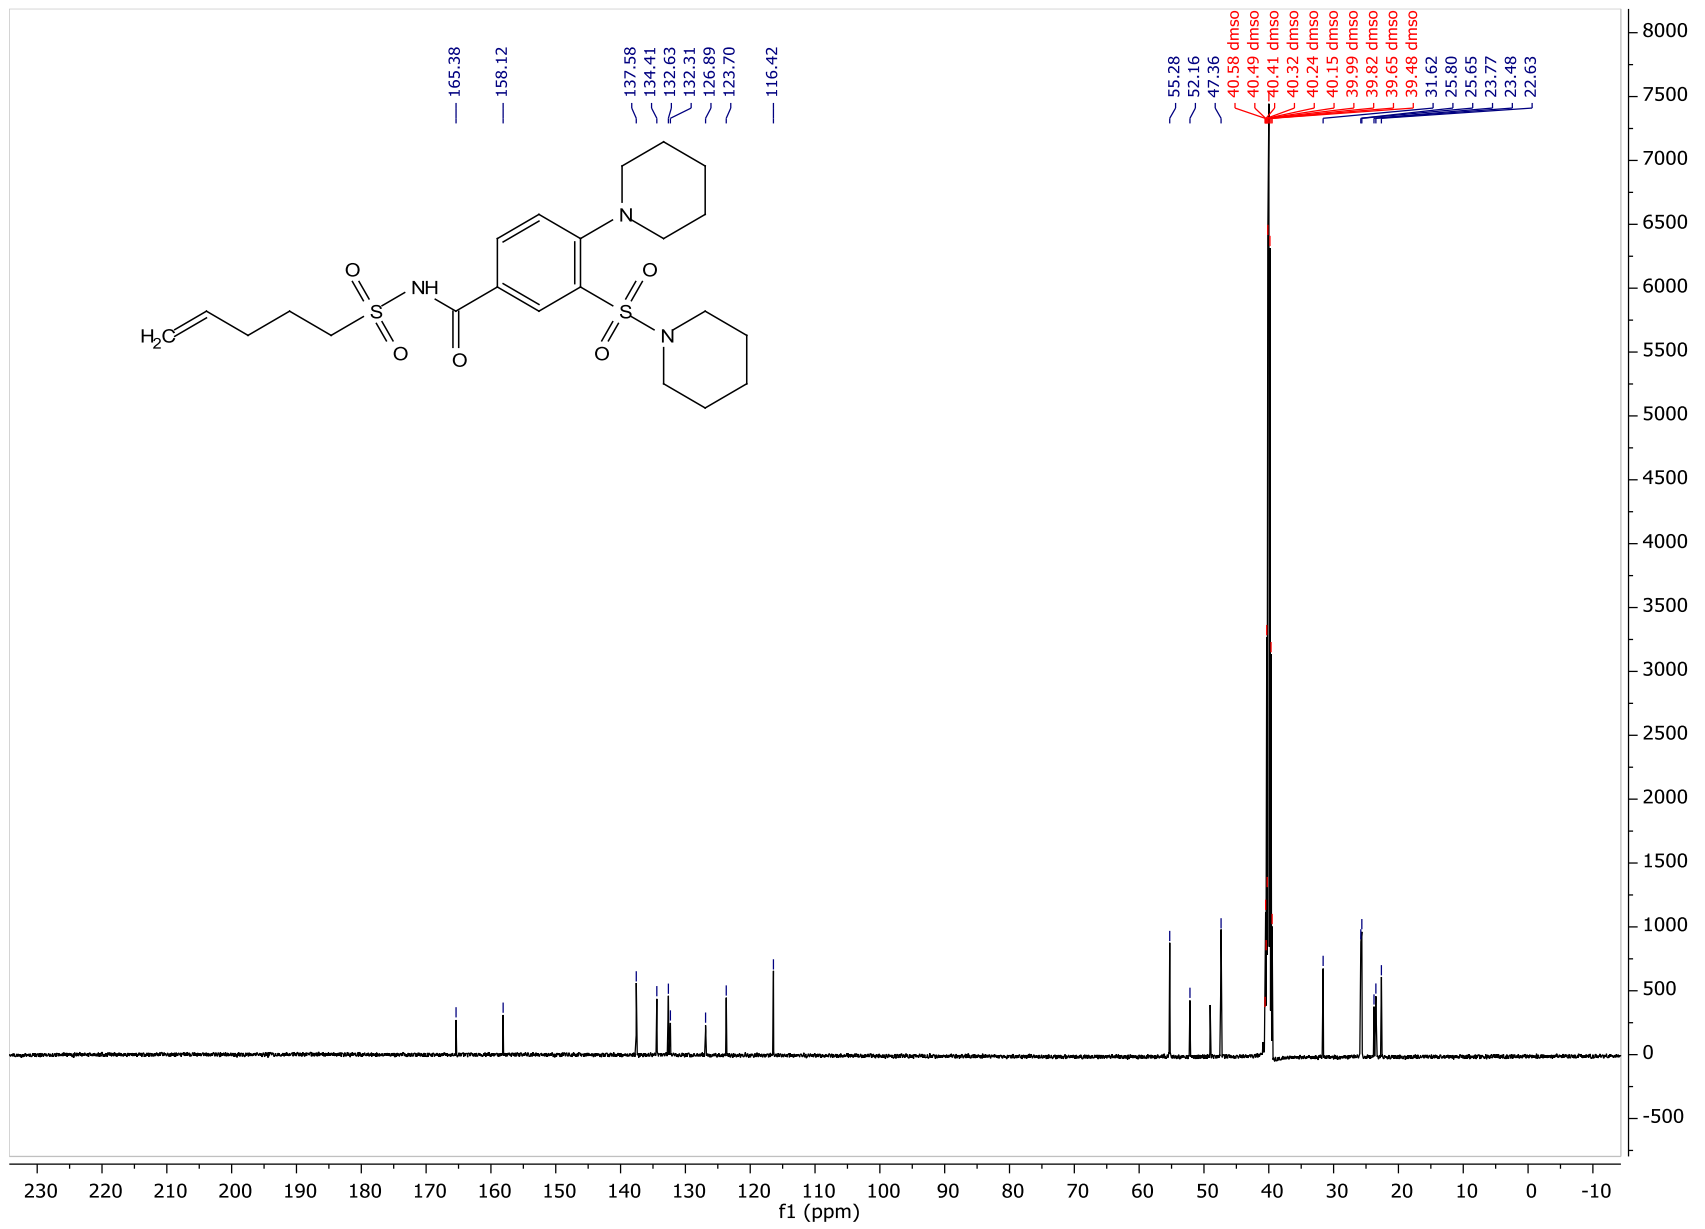

LC/MS spectrum of Z4886816116

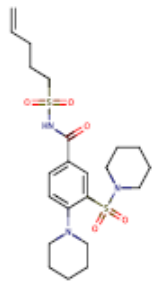

Mol Wt 483.64  
Exact Mass 483.22

| # | Time  | Area% |
|---|-------|-------|
| 1 | 1.318 | 1.40  |
| 2 | 1.444 | 90.81 |
| 3 | 1.676 | 7.79  |

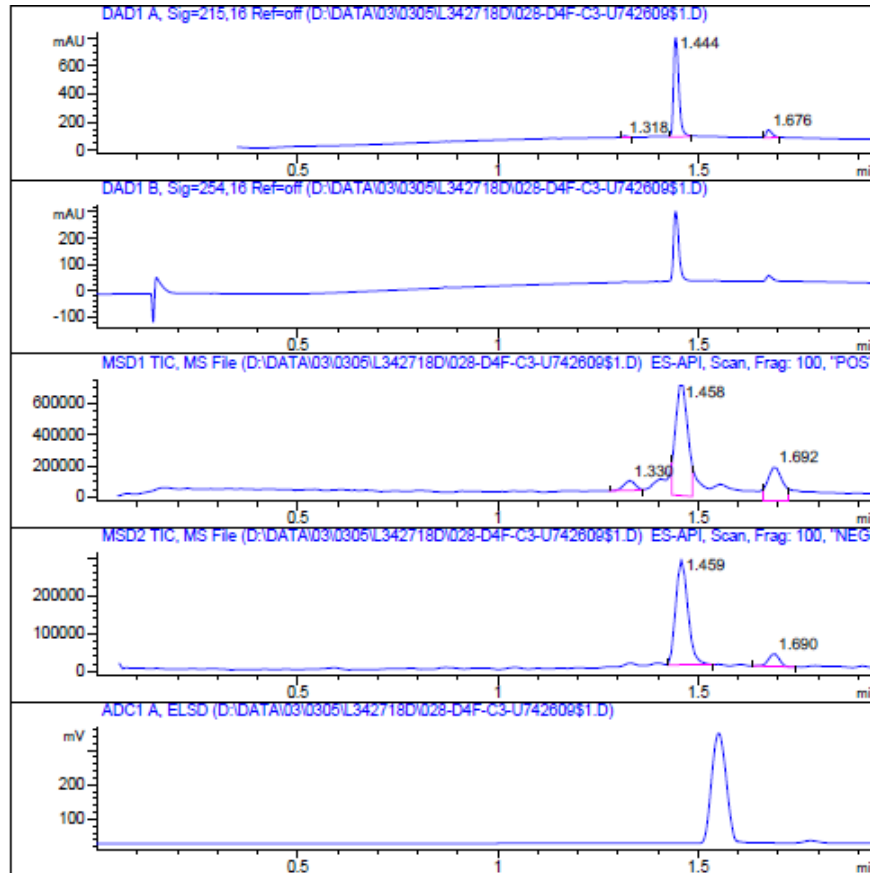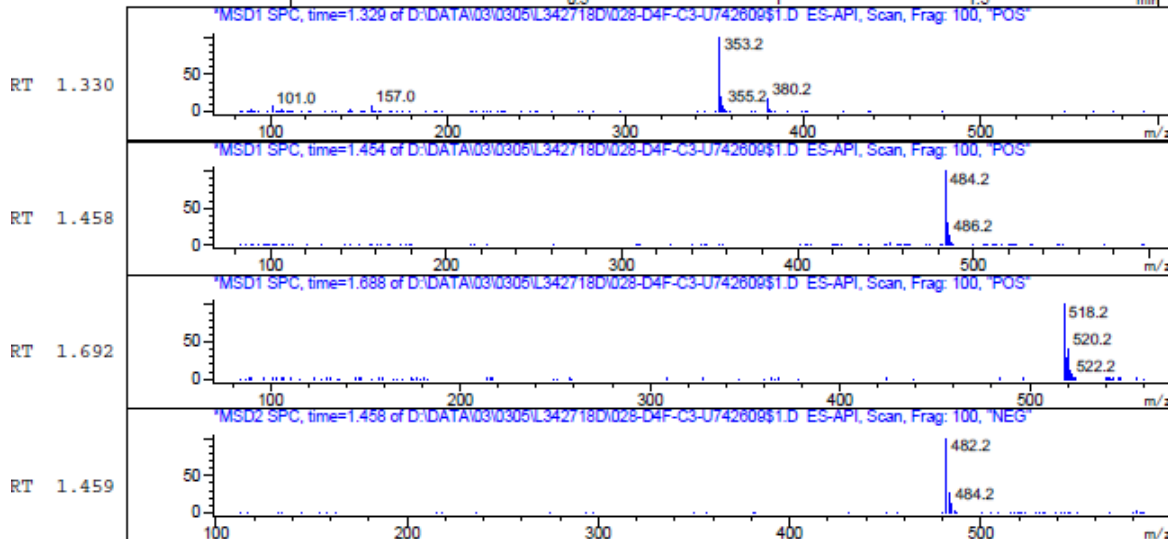

<sup>1</sup>H NMR spectrum of Z4886816119

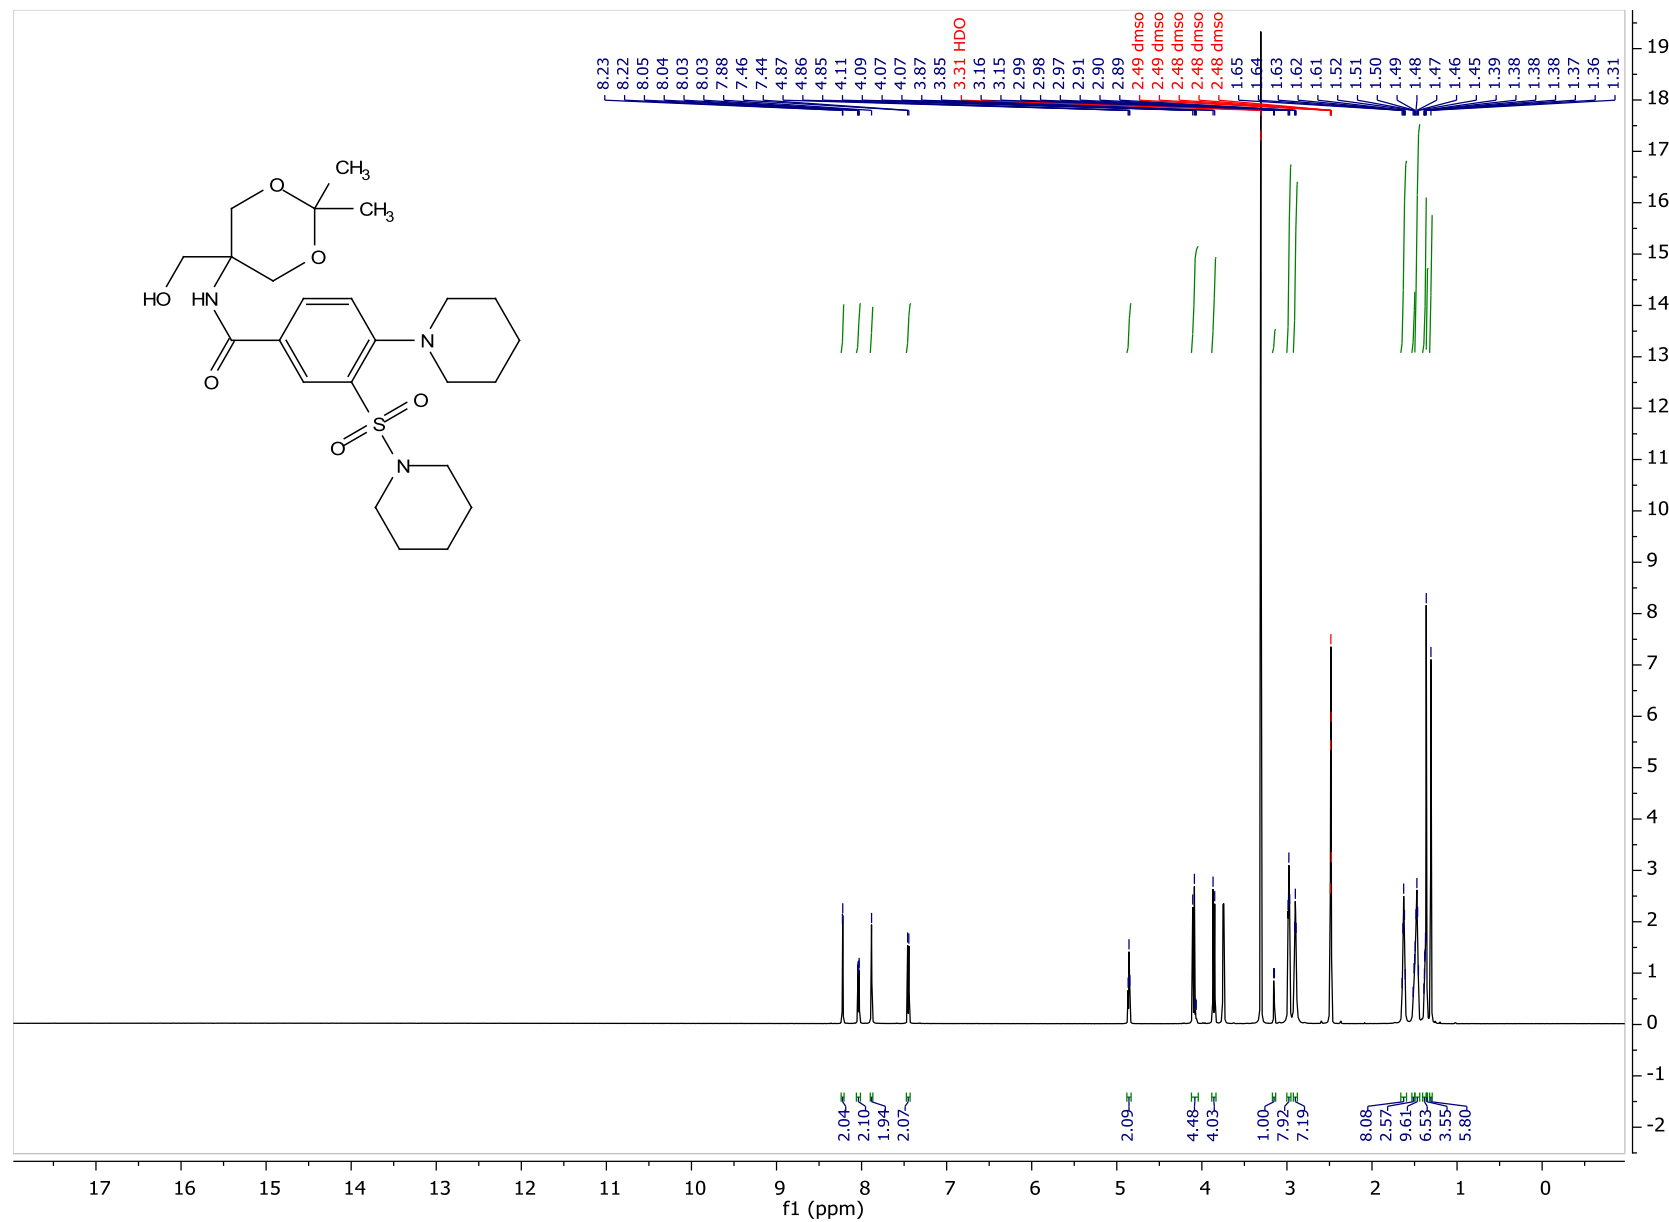

<sup>13</sup>C NMR spectrum of Z4886816119

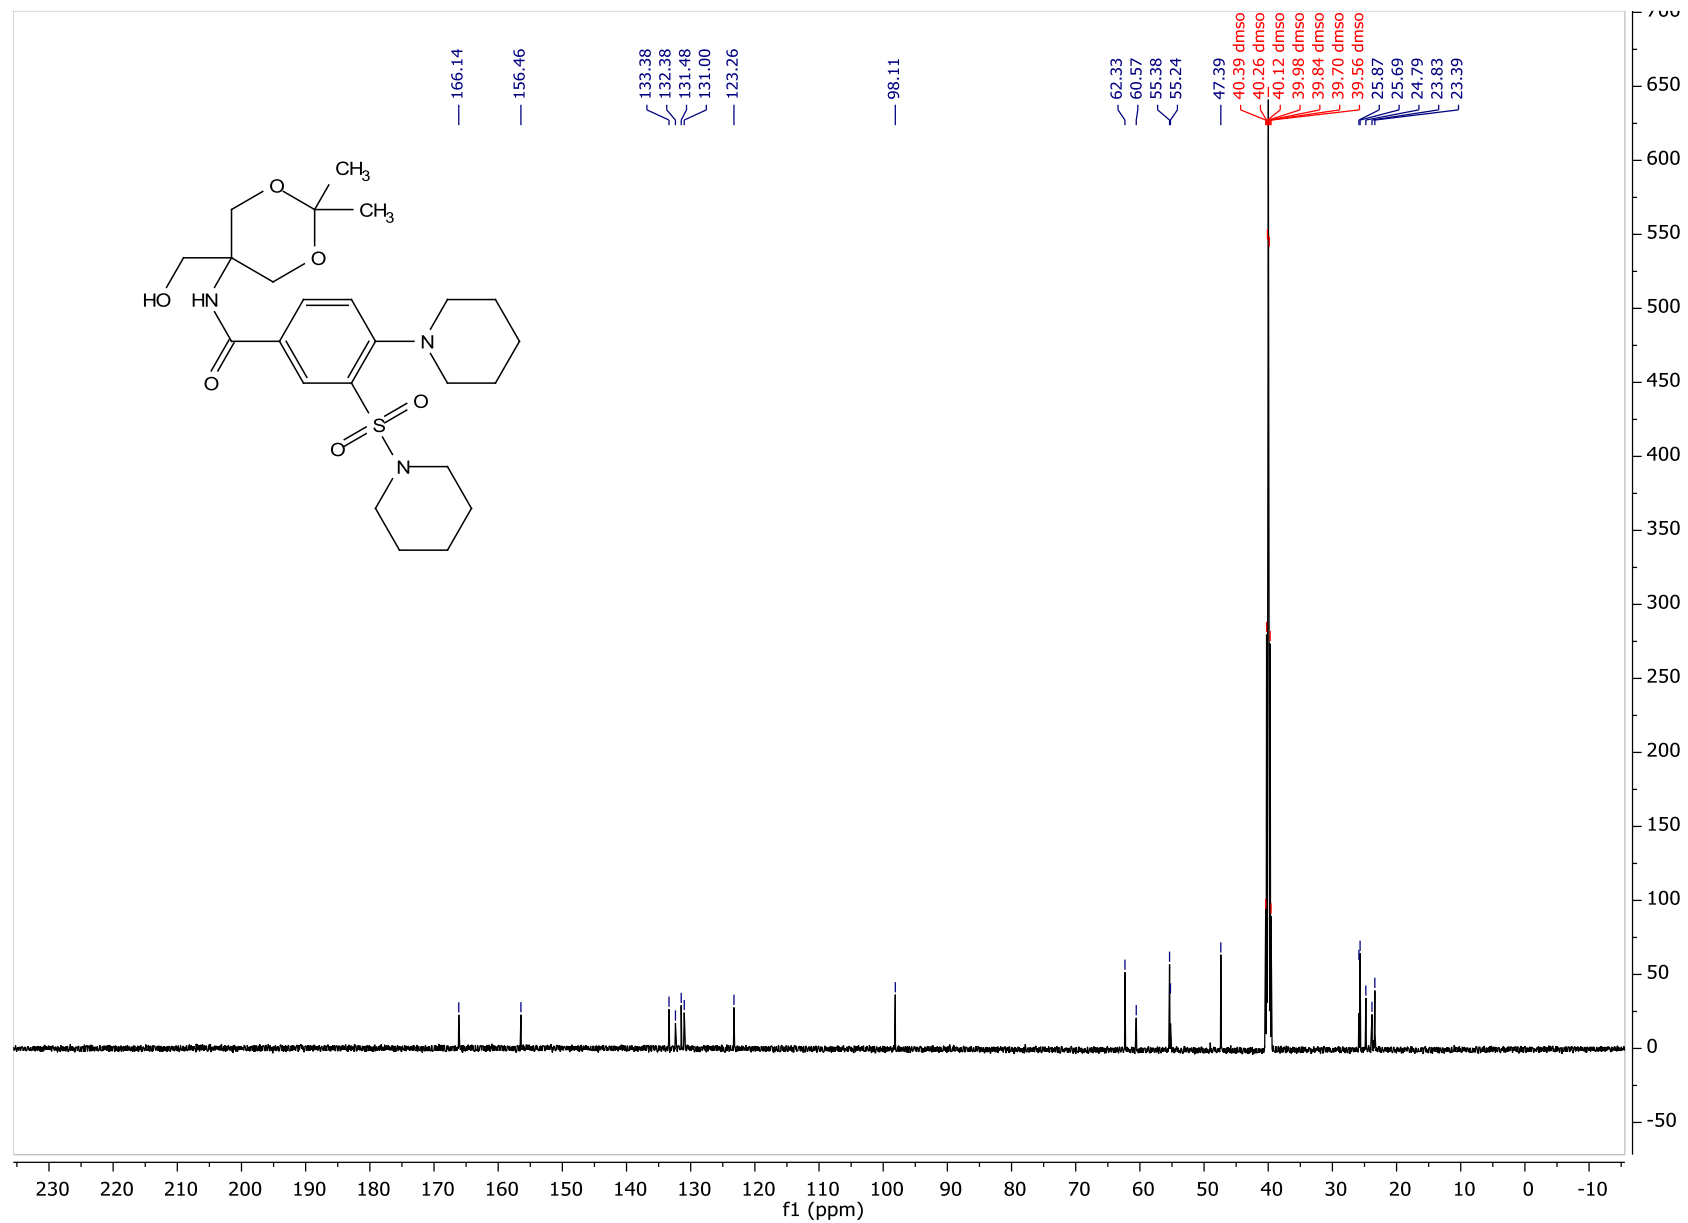



LC/MS spectrum of Z4886816119

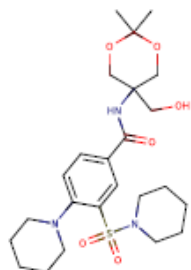

Mol Wt 495.63  
Exact Mass 495.28

| # | Time  | Area% |
|---|-------|-------|
| 1 | 1.275 | 2.34  |
| 2 | 1.452 | 97.66 |

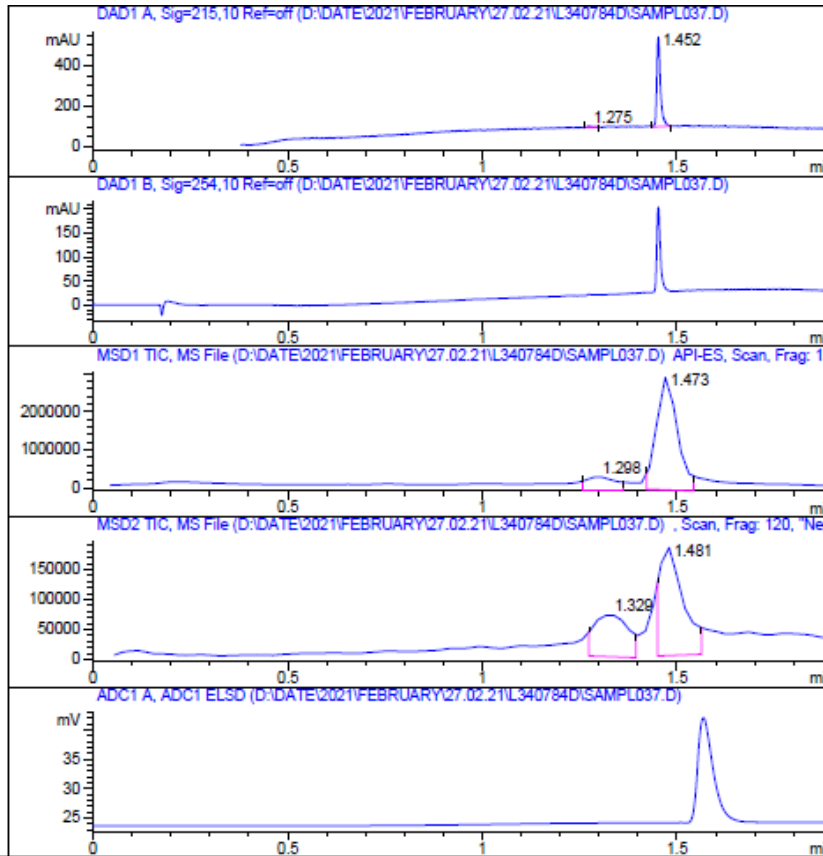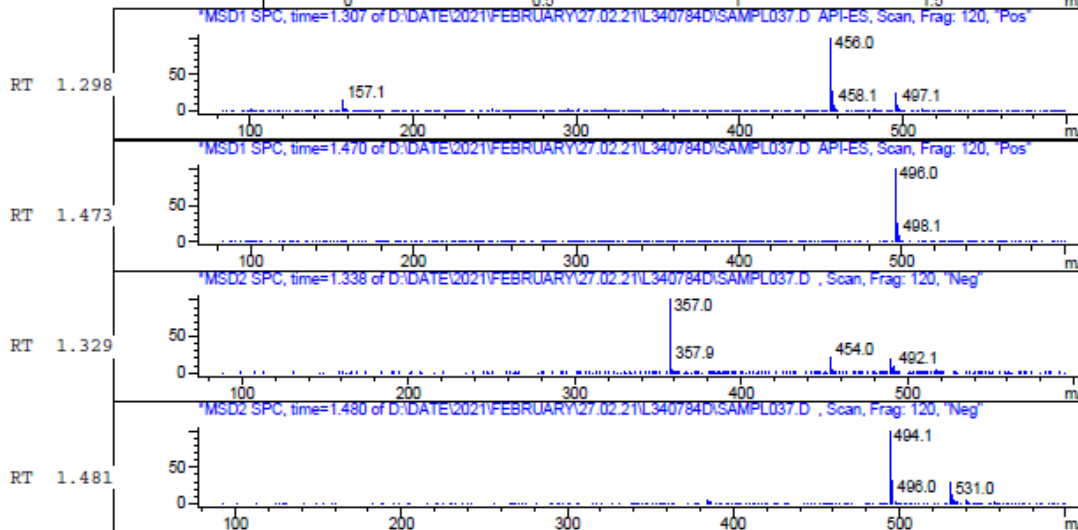

<sup>1</sup>H NMR spectrum of Z4886816121

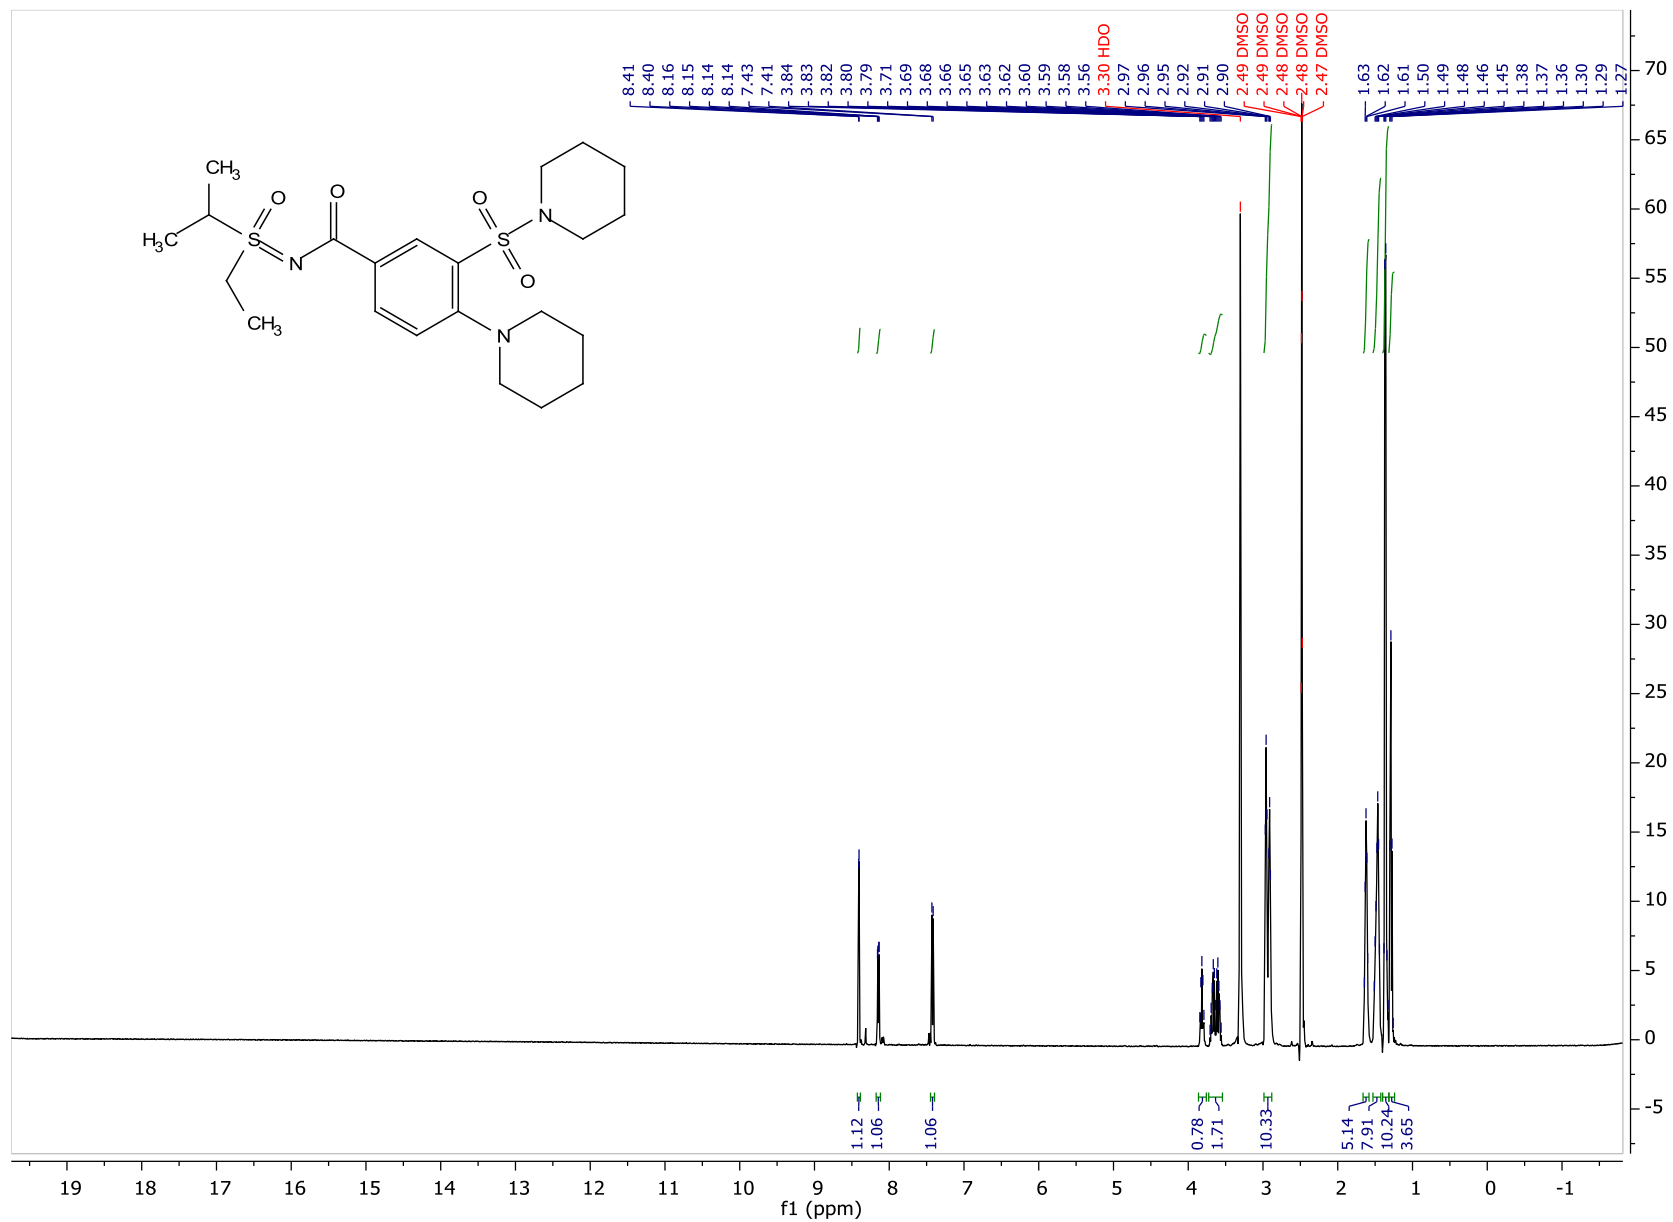

<sup>13</sup>C NMR spectrum of Z4886816121

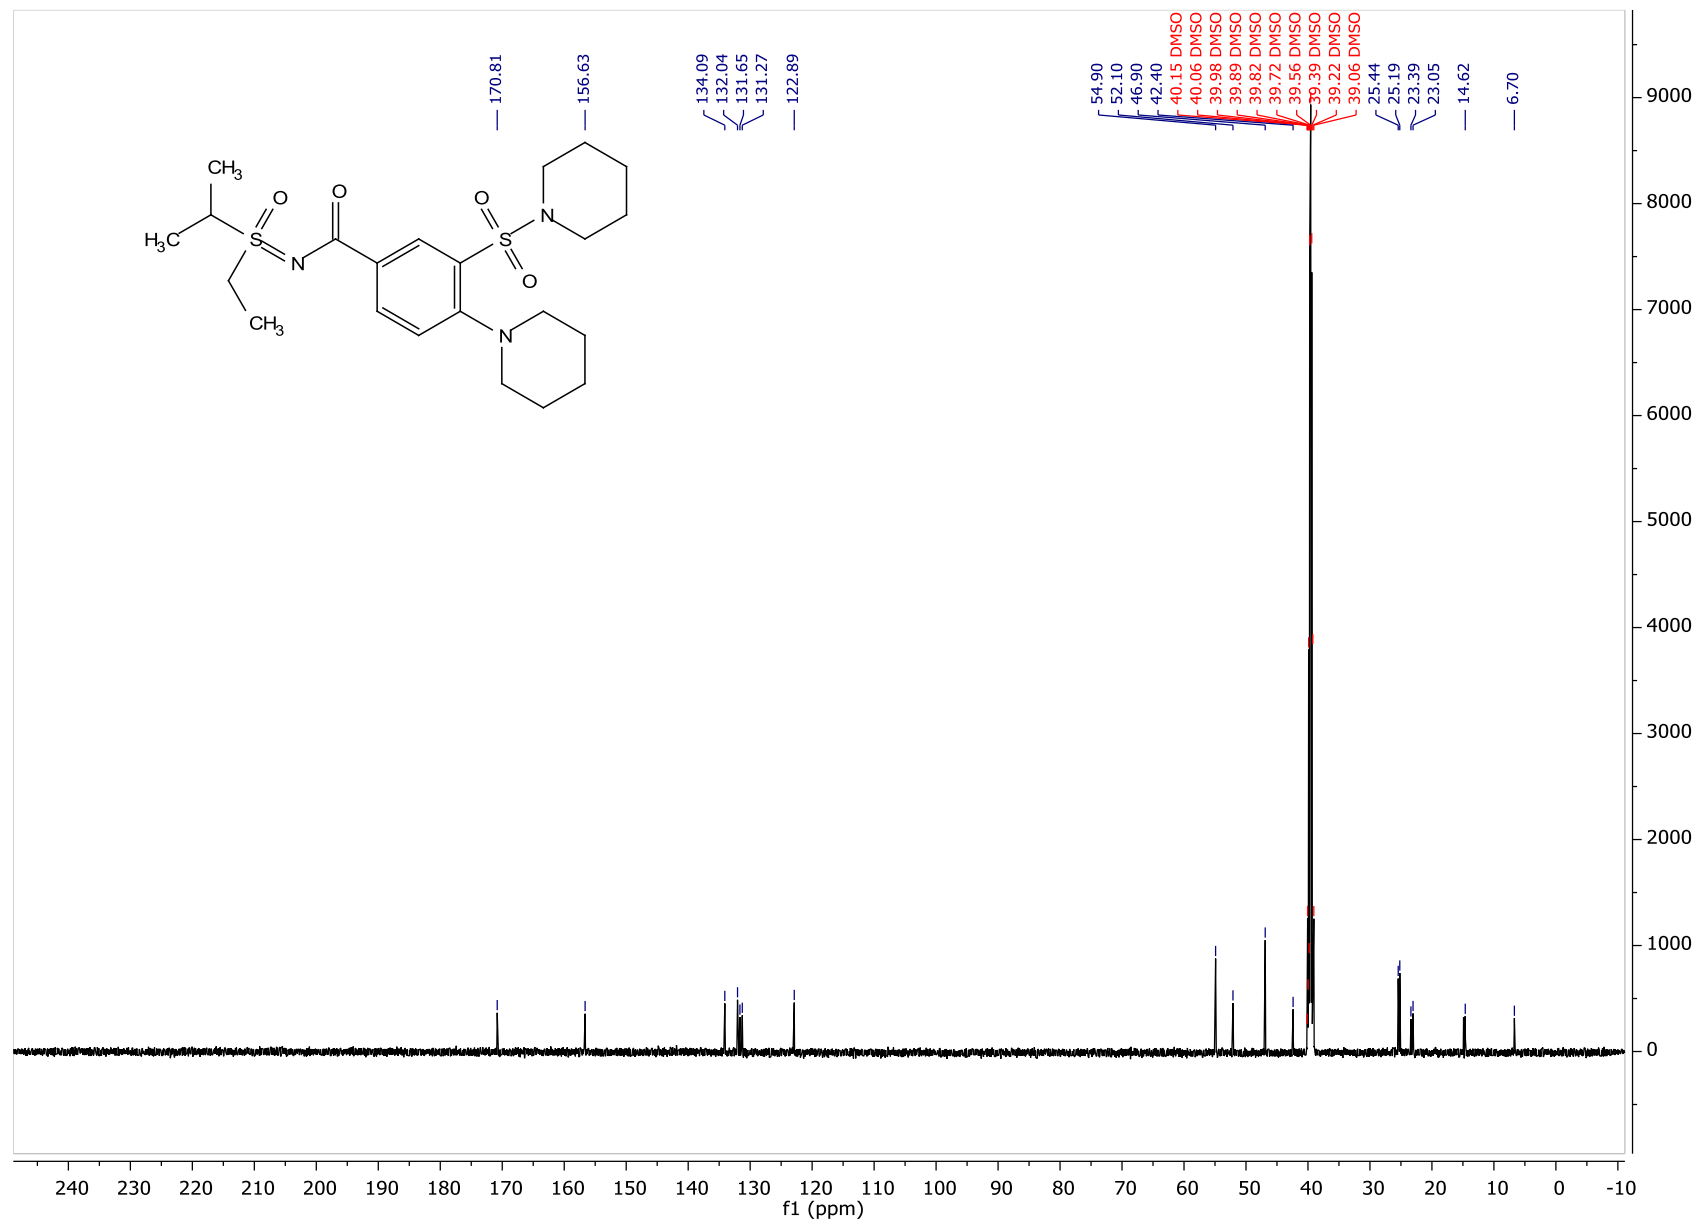

LC/MS spectrum of Z4886816121

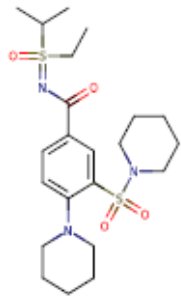

Mol Wt 469.66  
 Exact Mass 469.25

| # | Time  | Area% |
|---|-------|-------|
| 1 | 1.437 | 6.06  |
| 2 | 1.550 | 93.94 |

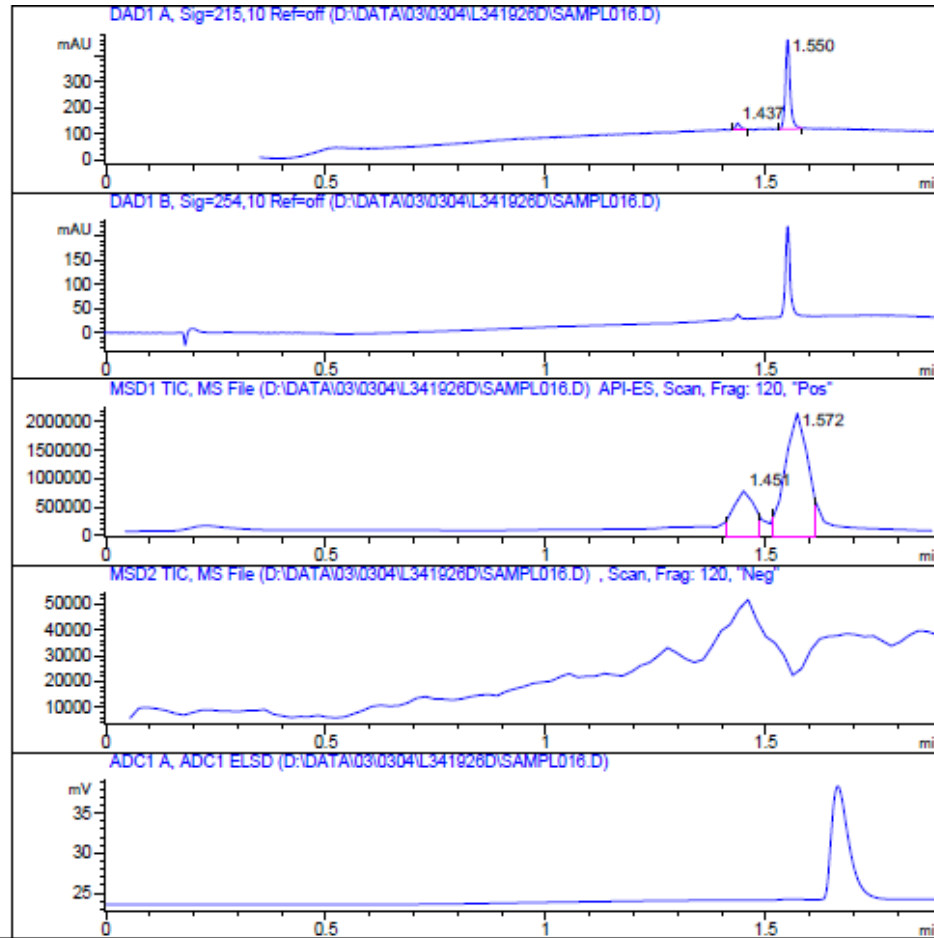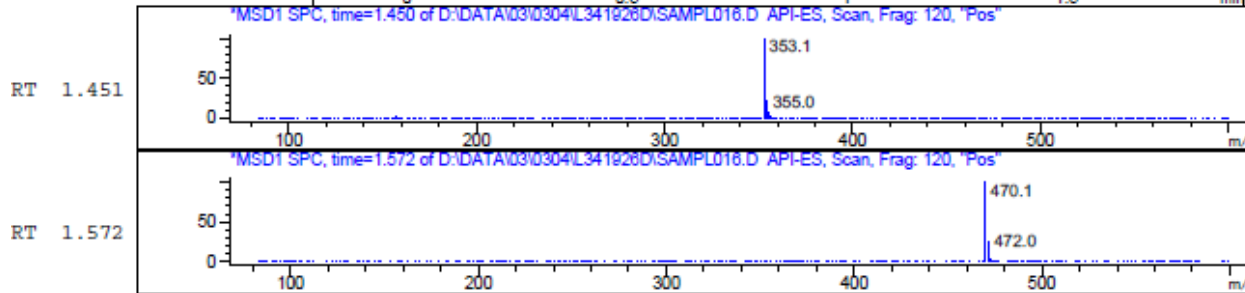

<sup>1</sup>H NMR spectrum of Z4886816128

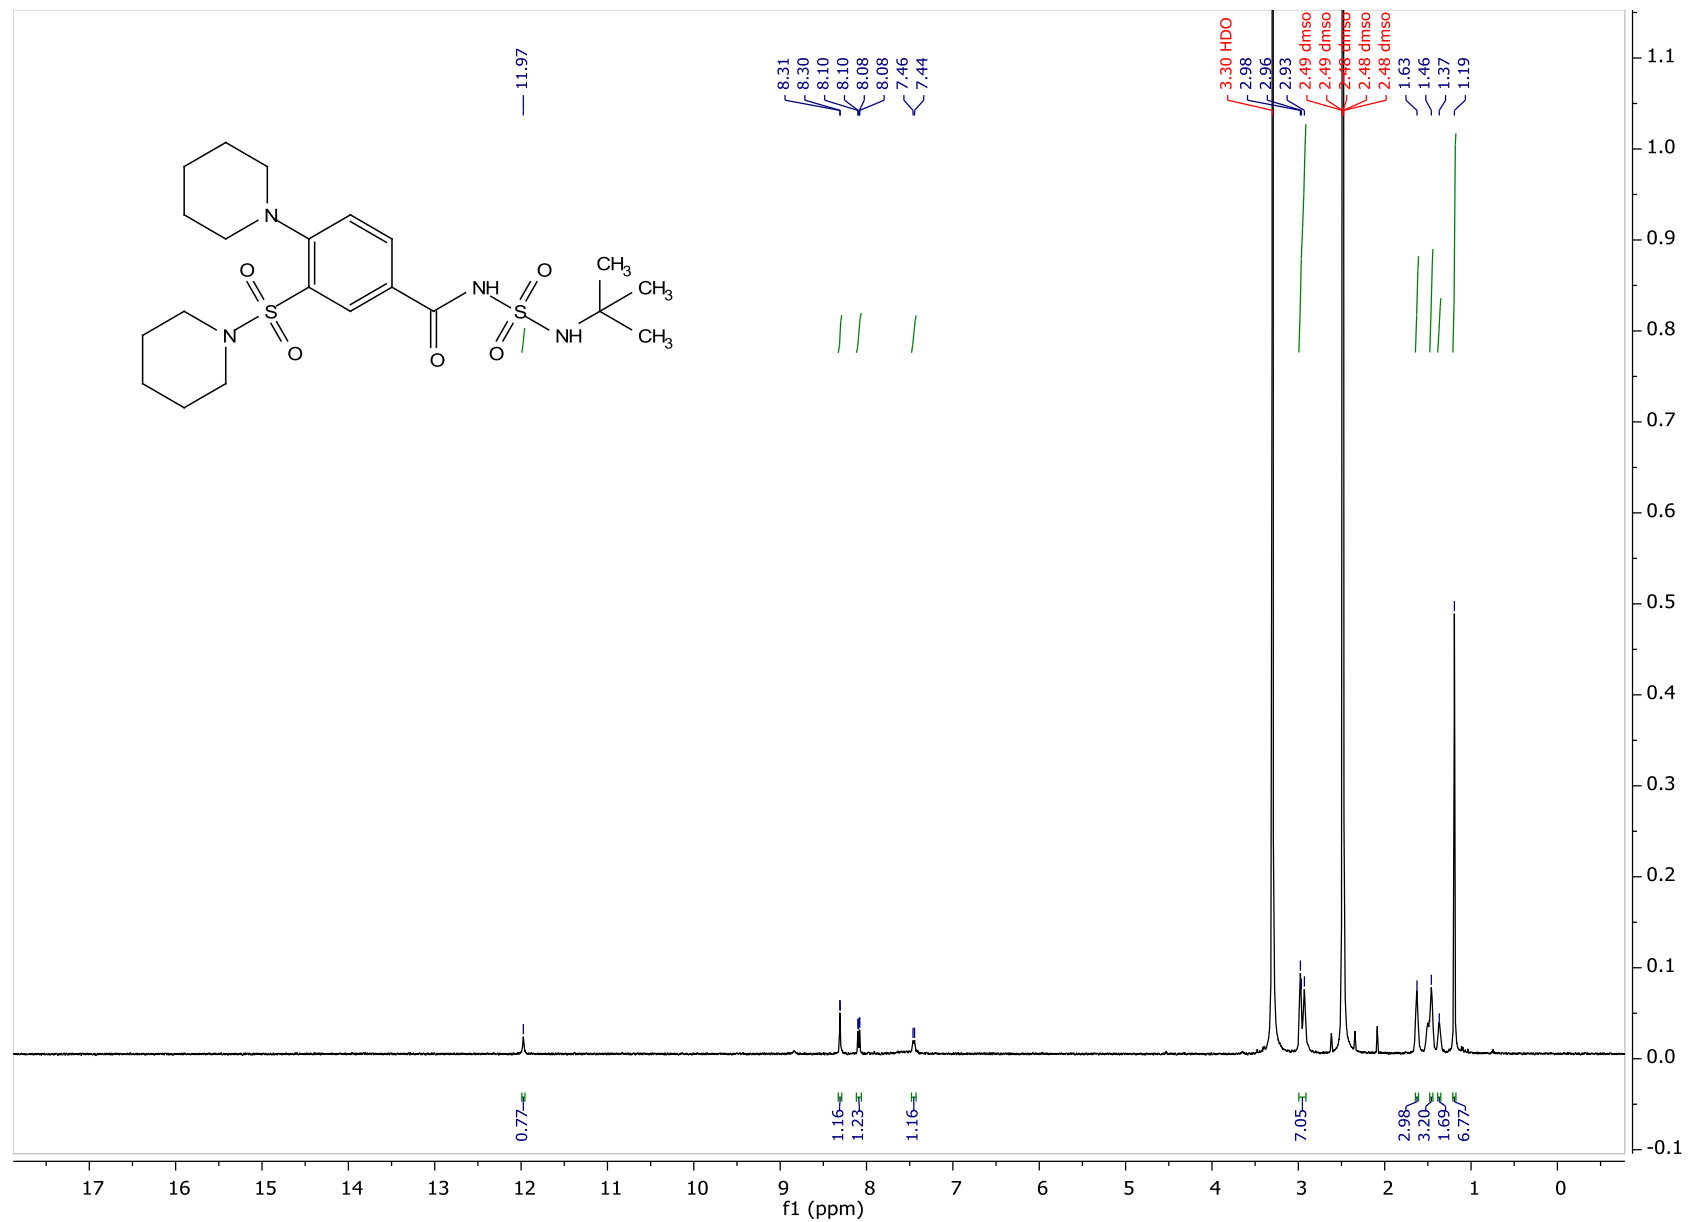

LC/MS spectrum of Z4886816128

Ret\_Time: 1.312 min

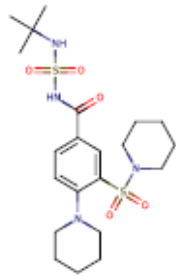

Mol Wt 486.65  
Exact Mass 486.23

| # | Time  | Area%  |
|---|-------|--------|
| 1 | 1.312 | 100.00 |

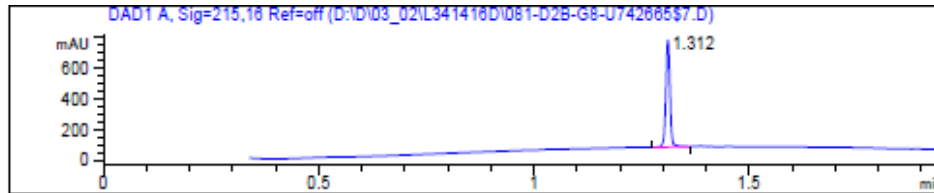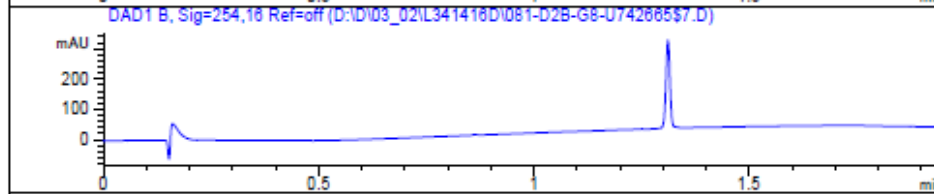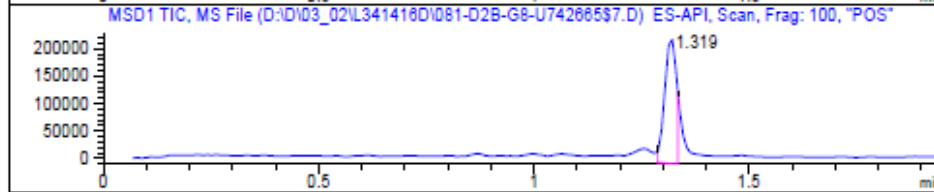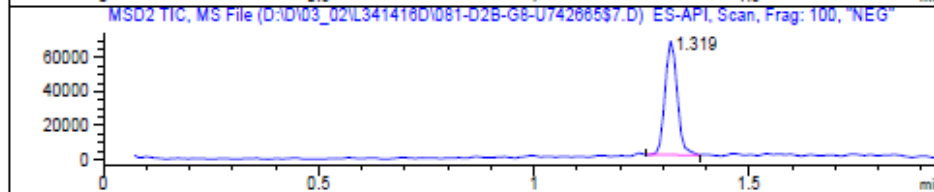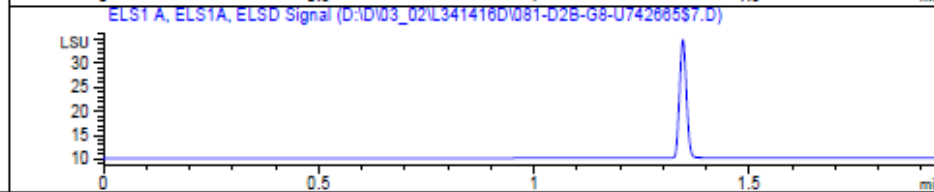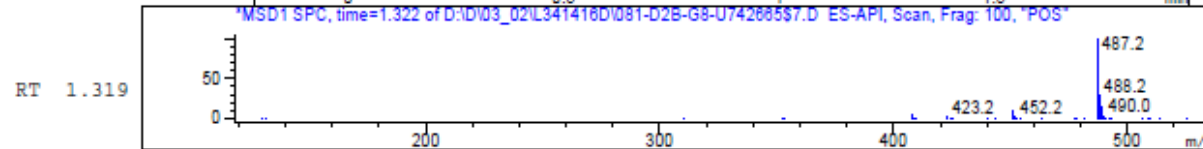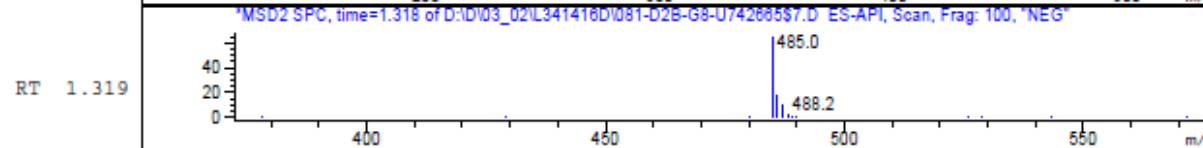

<sup>1</sup>H NMR spectrum of Z4886816129

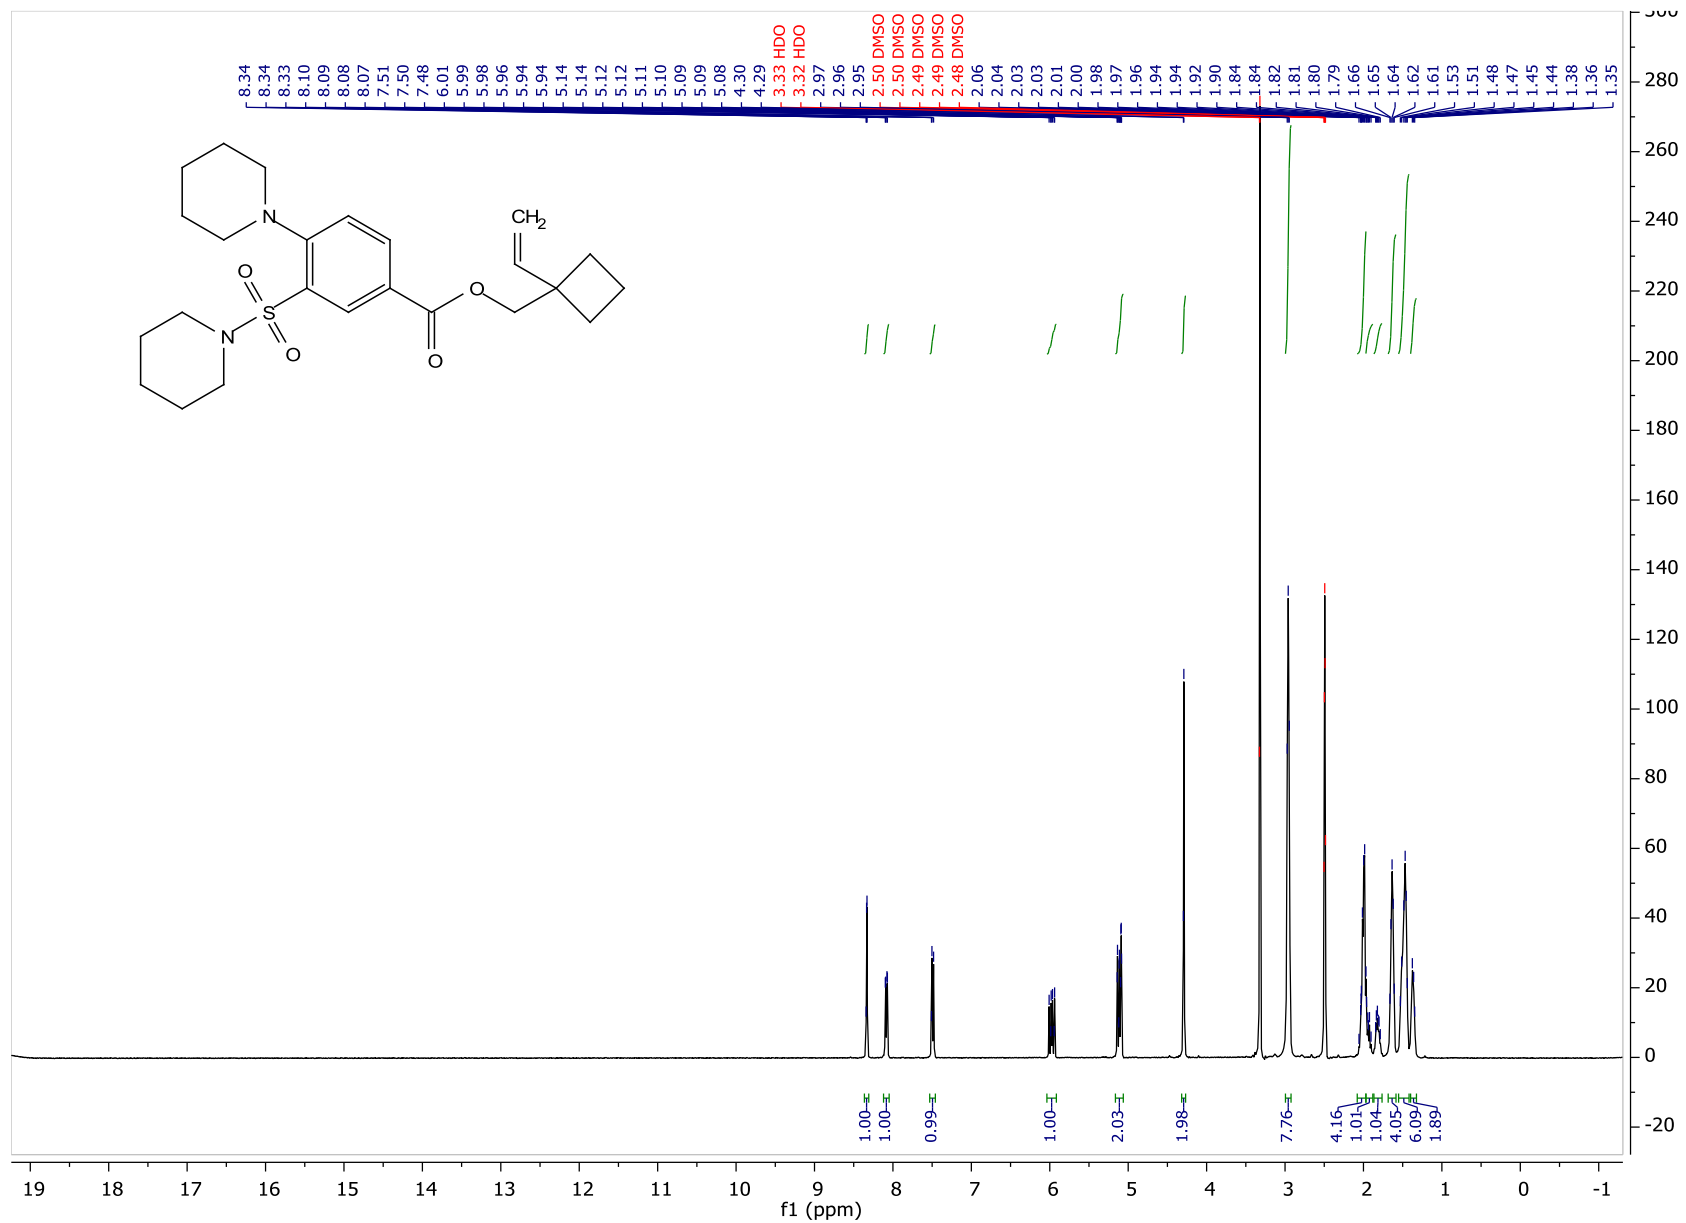

<sup>13</sup>C NMR spectrum of Z4886816129

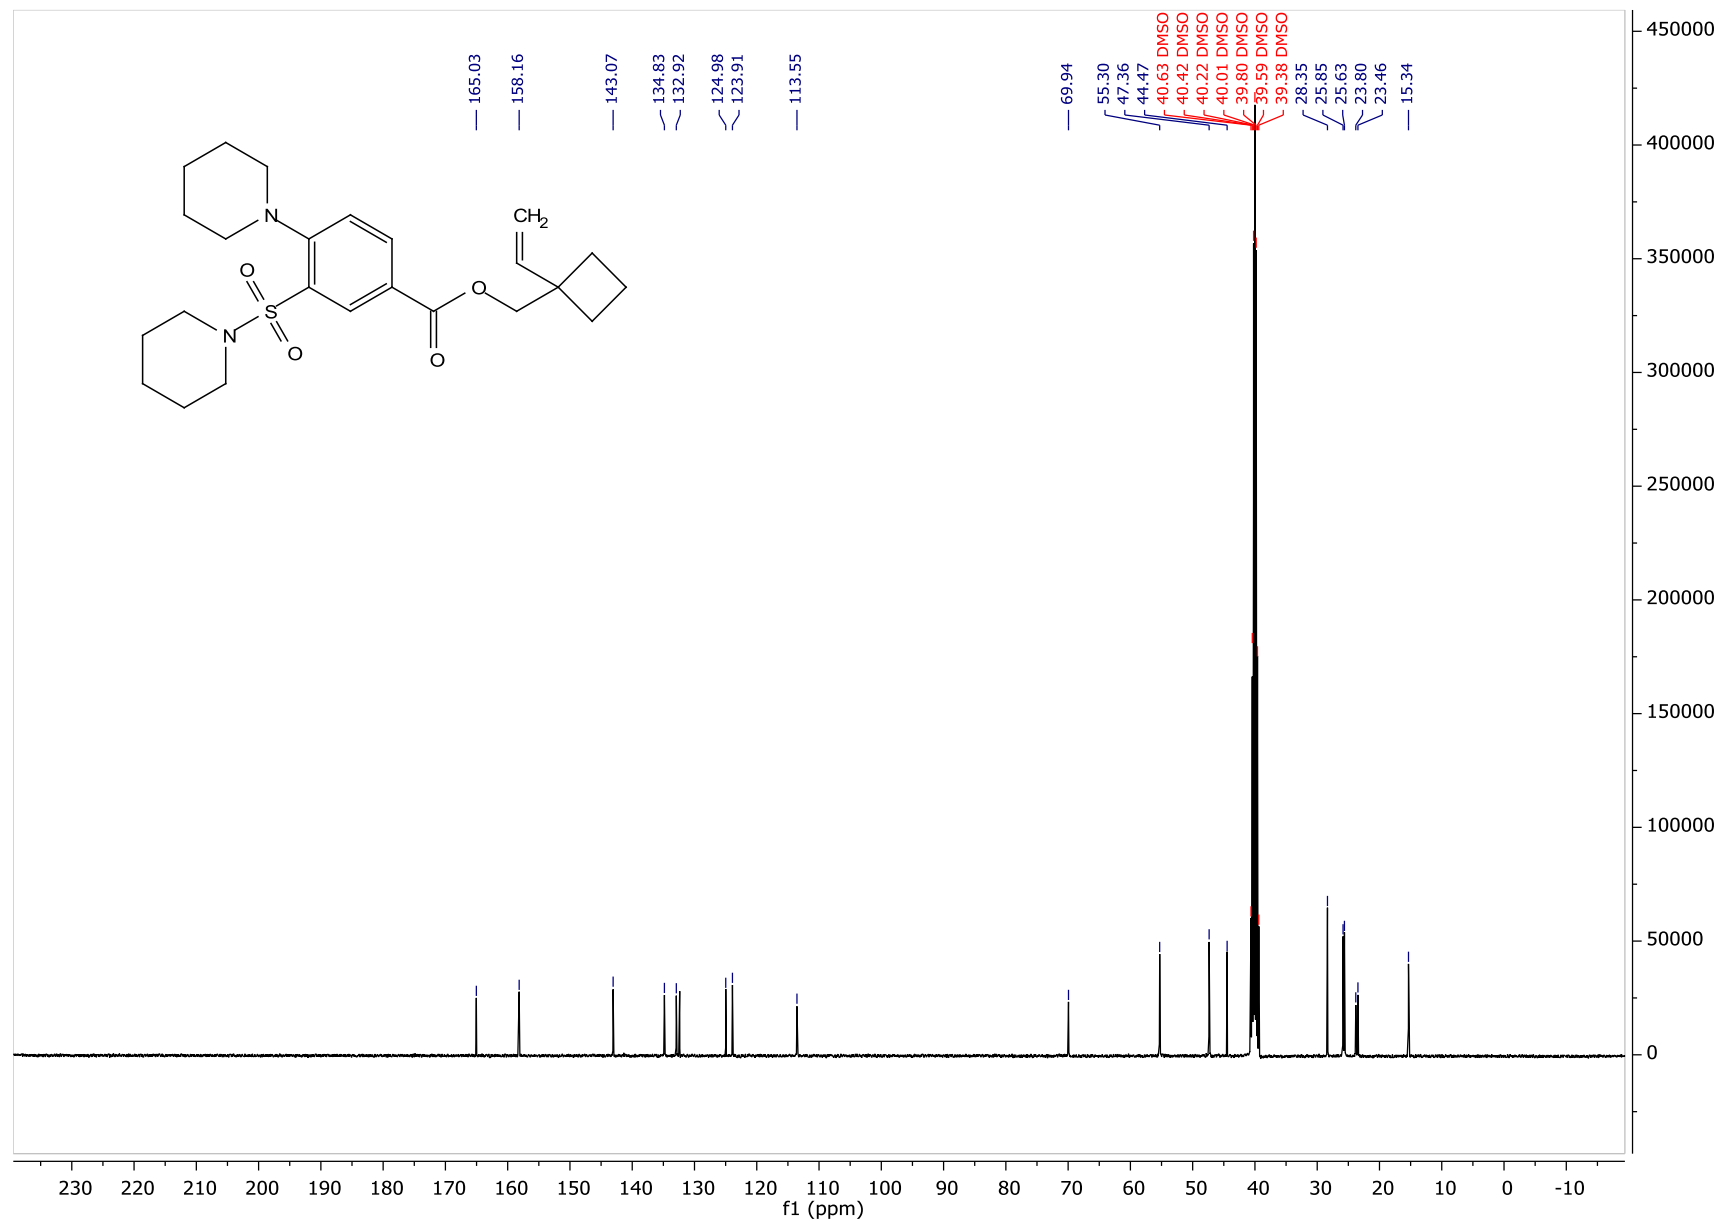



LC/MS spectrum of Z4886816129

Ret\_Time: 1.844 min

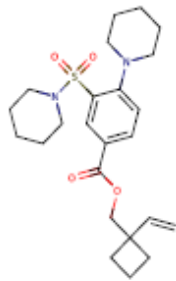

Mol Wt 446.6  
 Exact Mass 446.27

| # | Time  | Area%  |
|---|-------|--------|
| 1 | 1.844 | 100.00 |

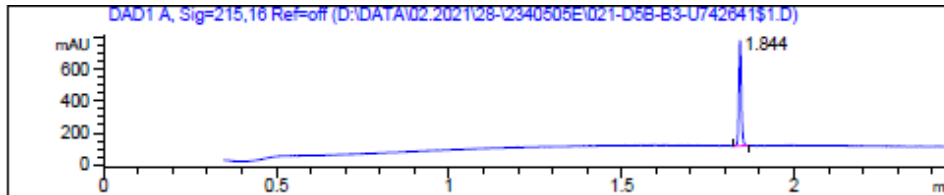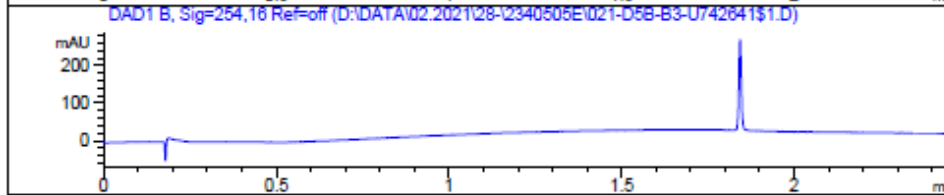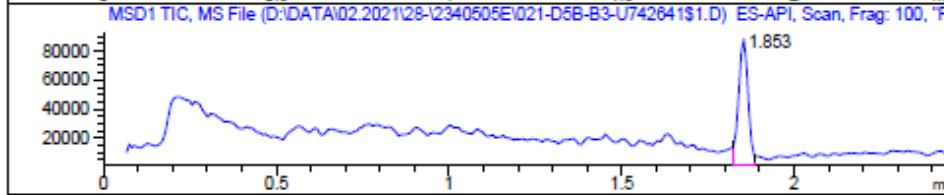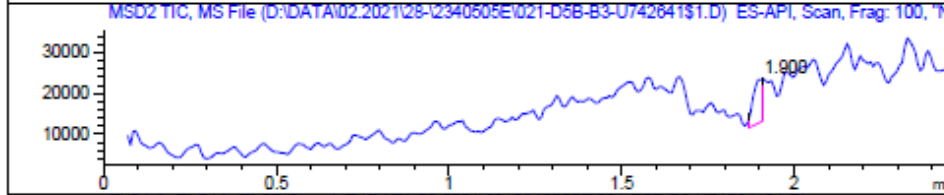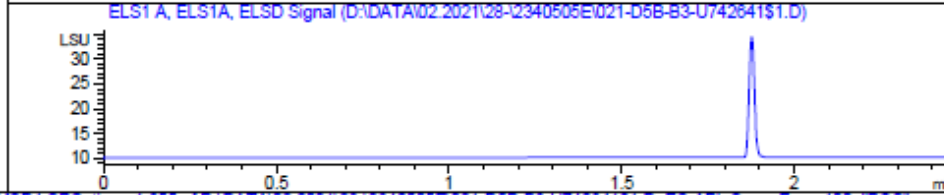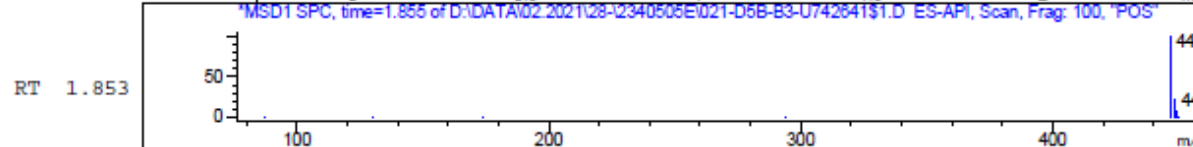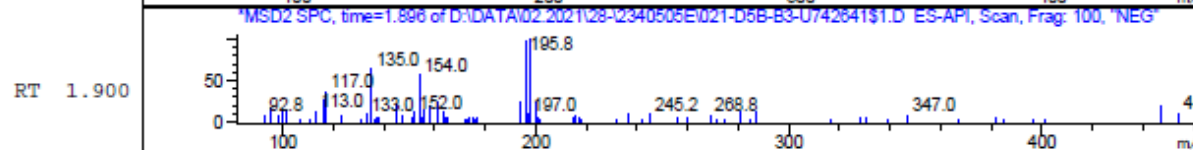

<sup>1</sup>H NMR spectrum of Z4886816131

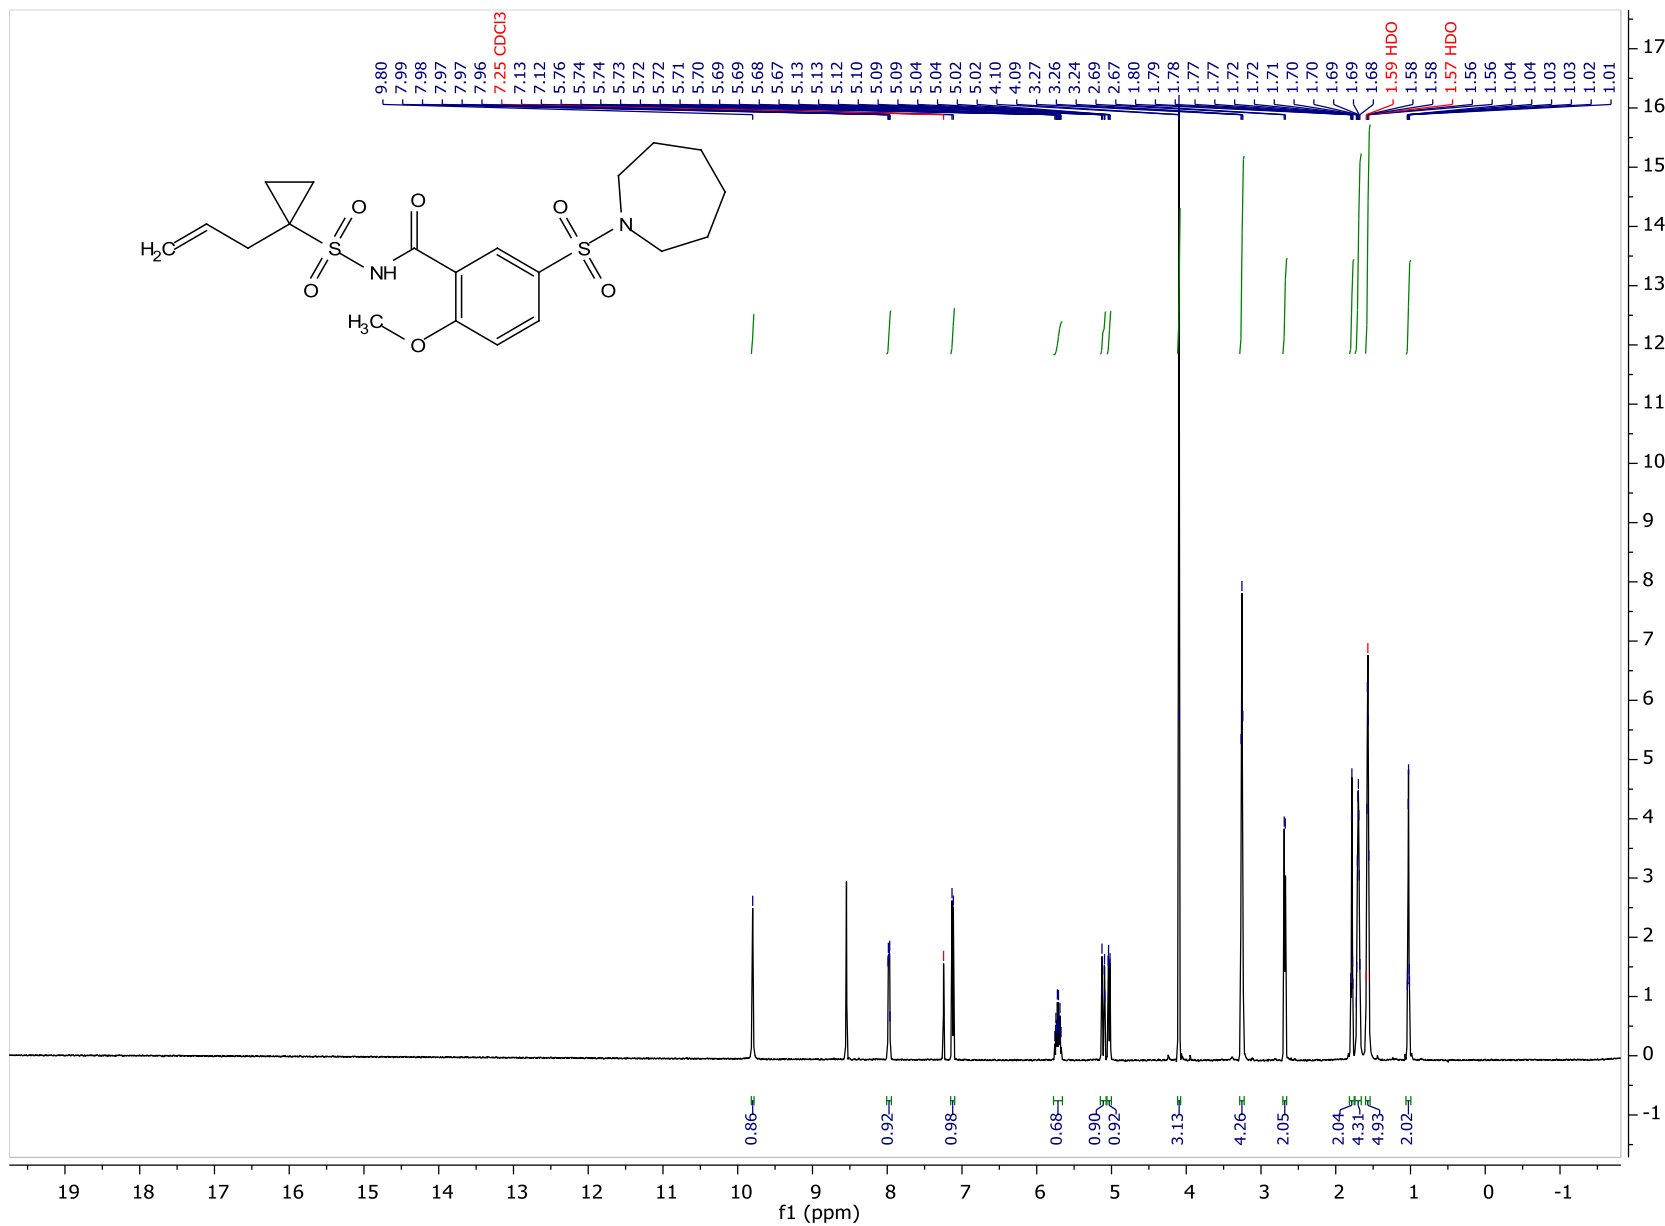

<sup>13</sup>C NMR spectrum of Z4886816131

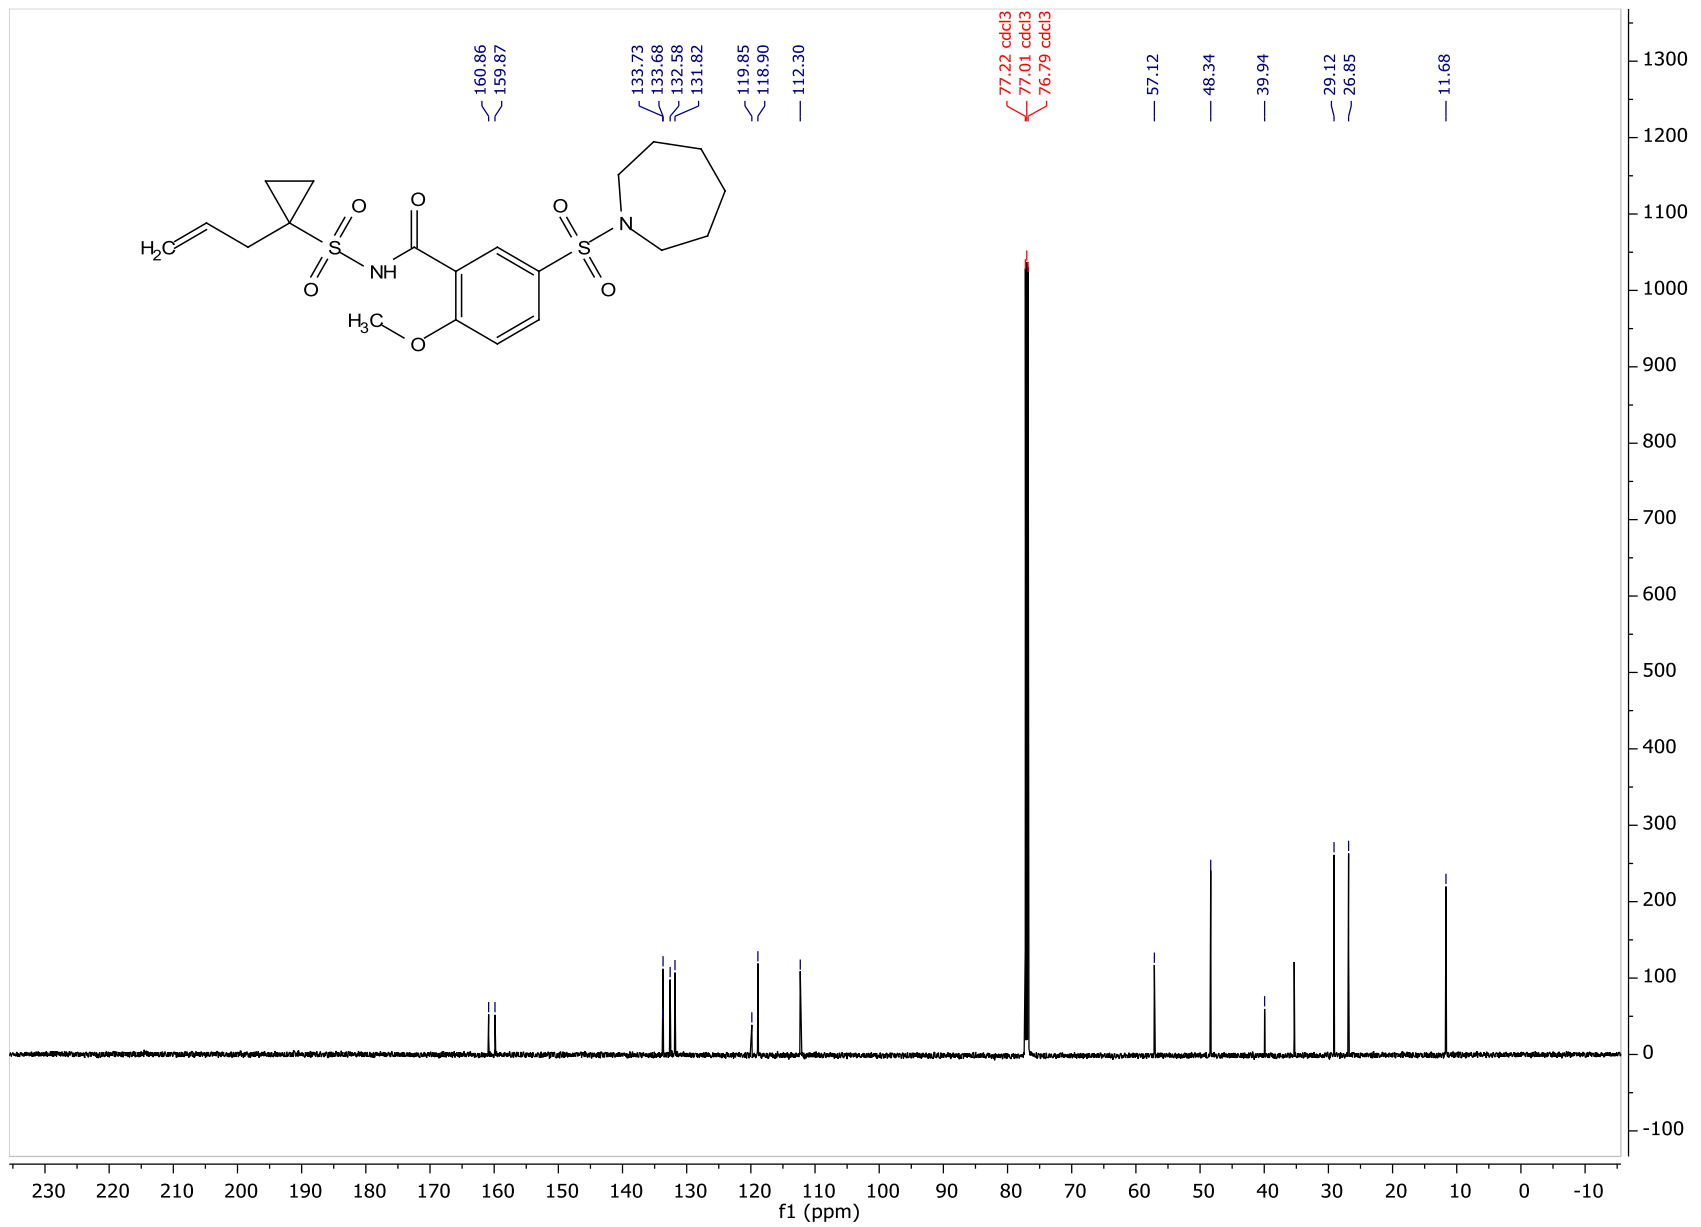

LC/MS spectrum of Z4886816131

Ret\_Time: 1.491 min

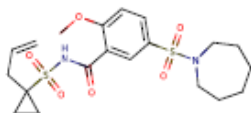

Mol Wt 456.58  
Exact Mass 456.16

| # | Time  | Area  |
|---|-------|-------|
| 1 | 1.491 | 97.26 |
| 2 | 1.509 | 1.07  |
| 3 | 1.563 | 1.67  |

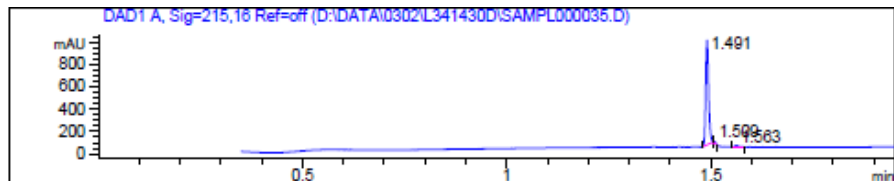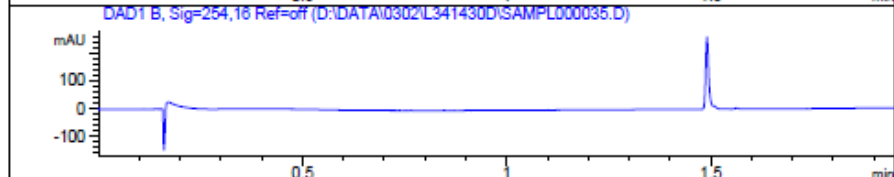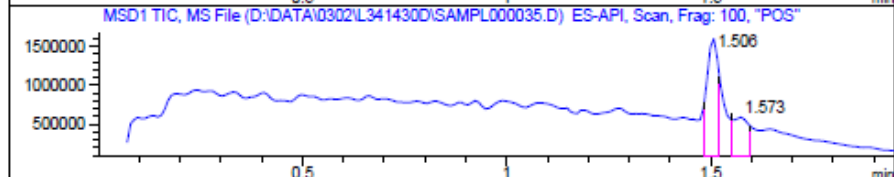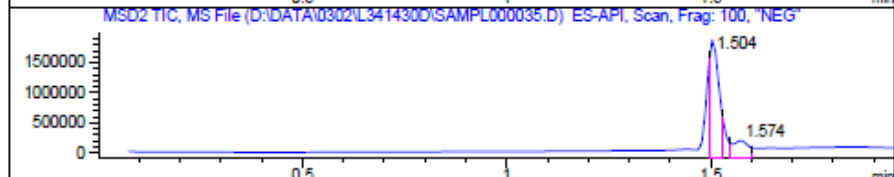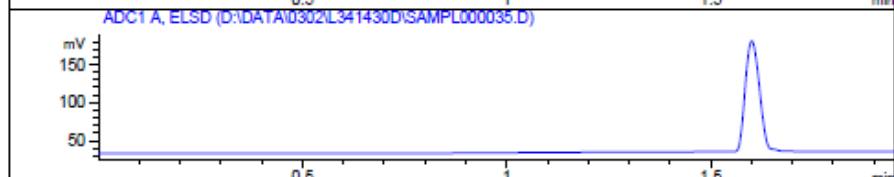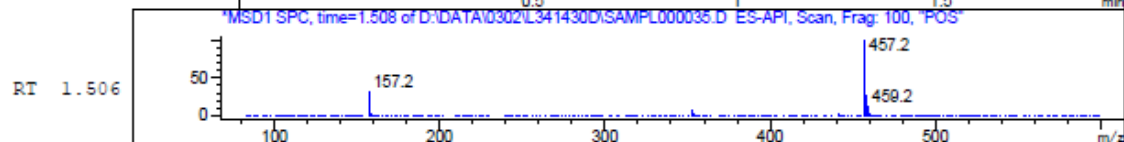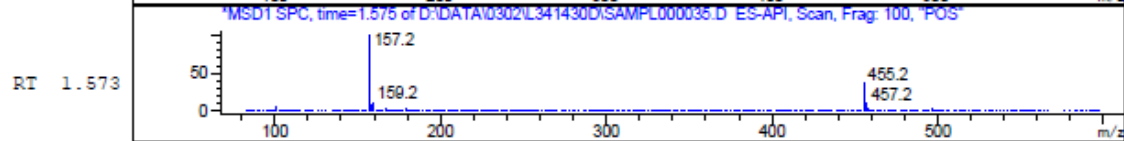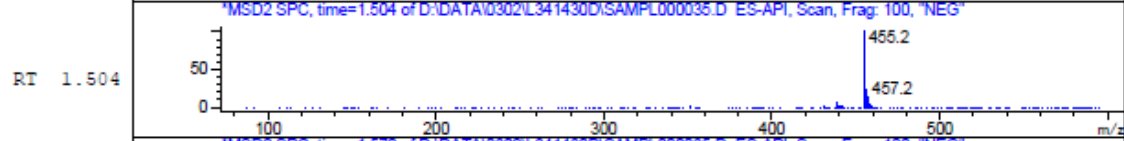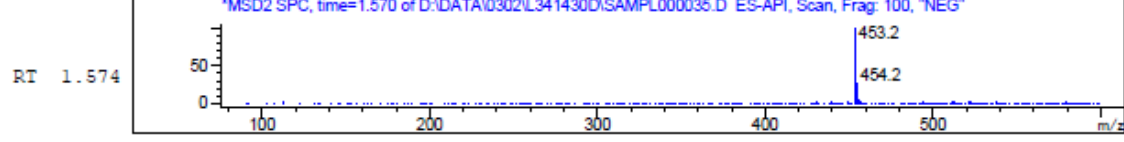

<sup>1</sup>H NMR spectrum of Z4886816147

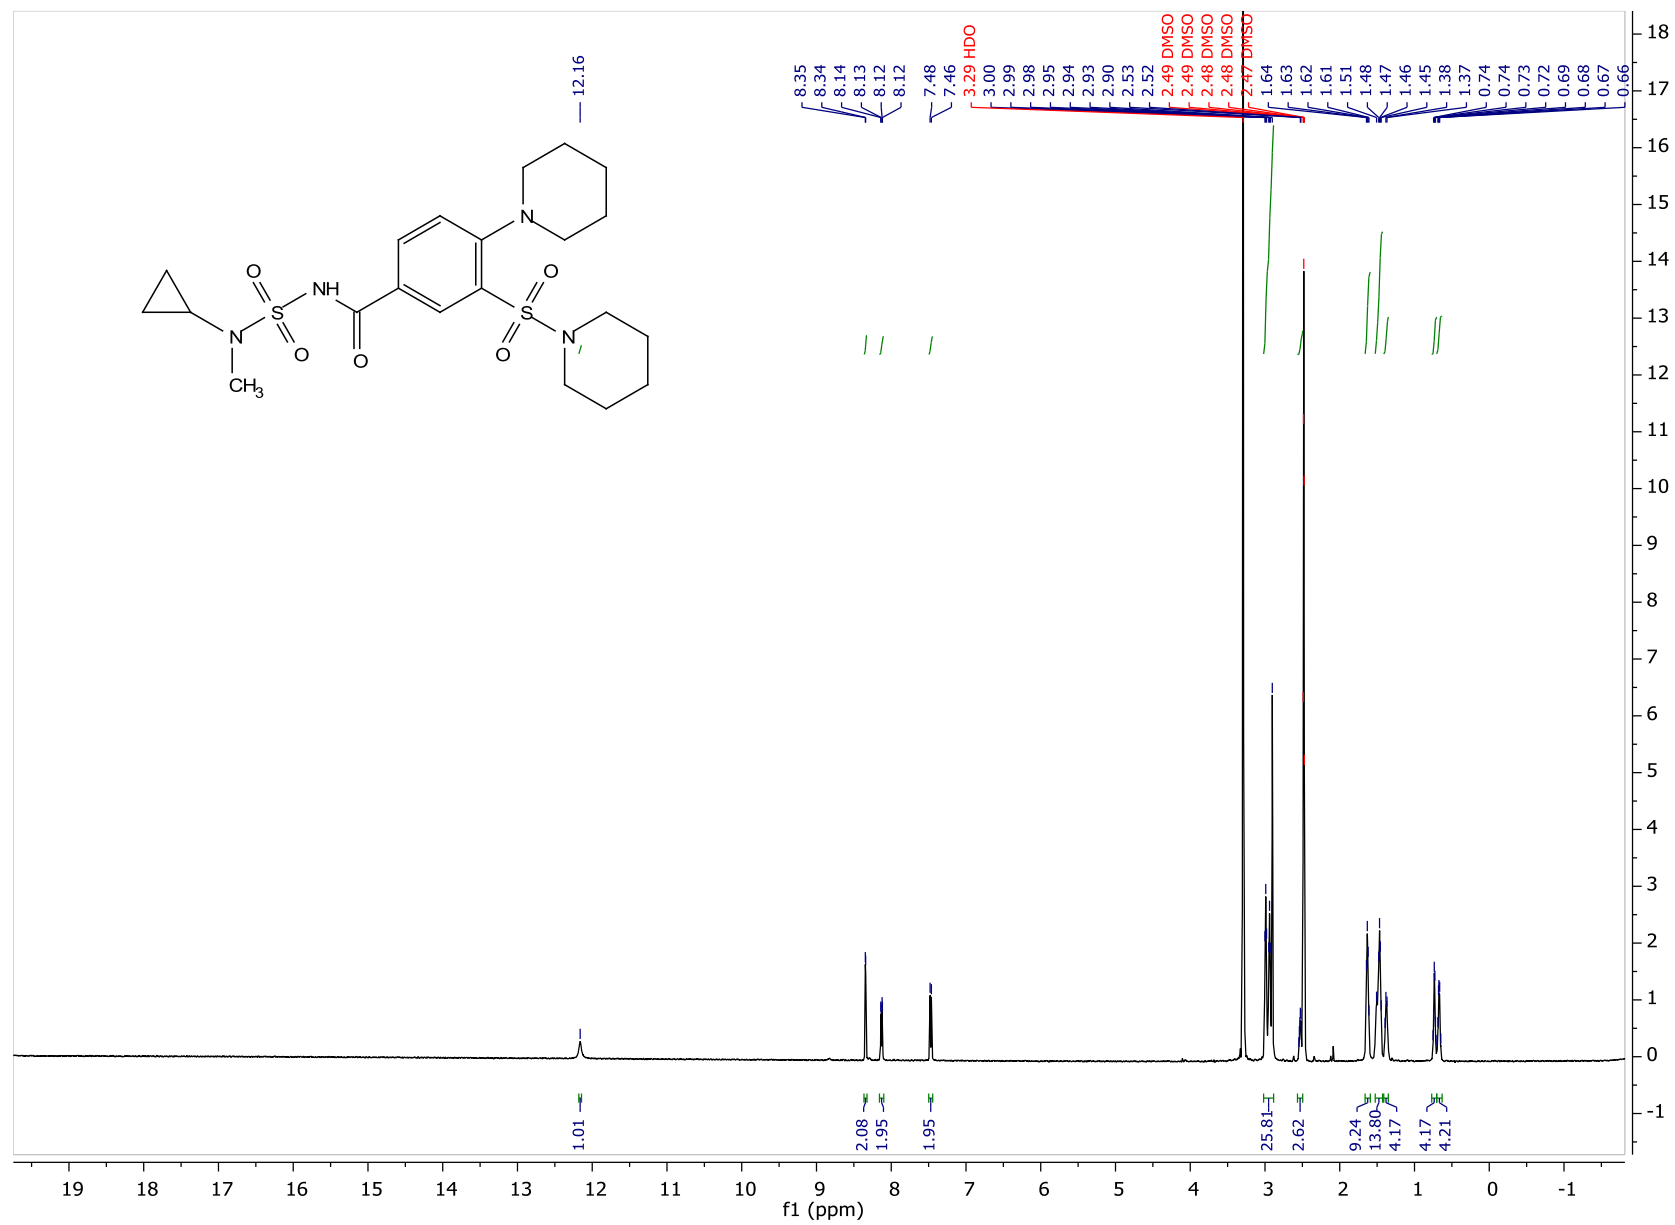

<sup>13</sup>C NMR spectrum of Z4886816147

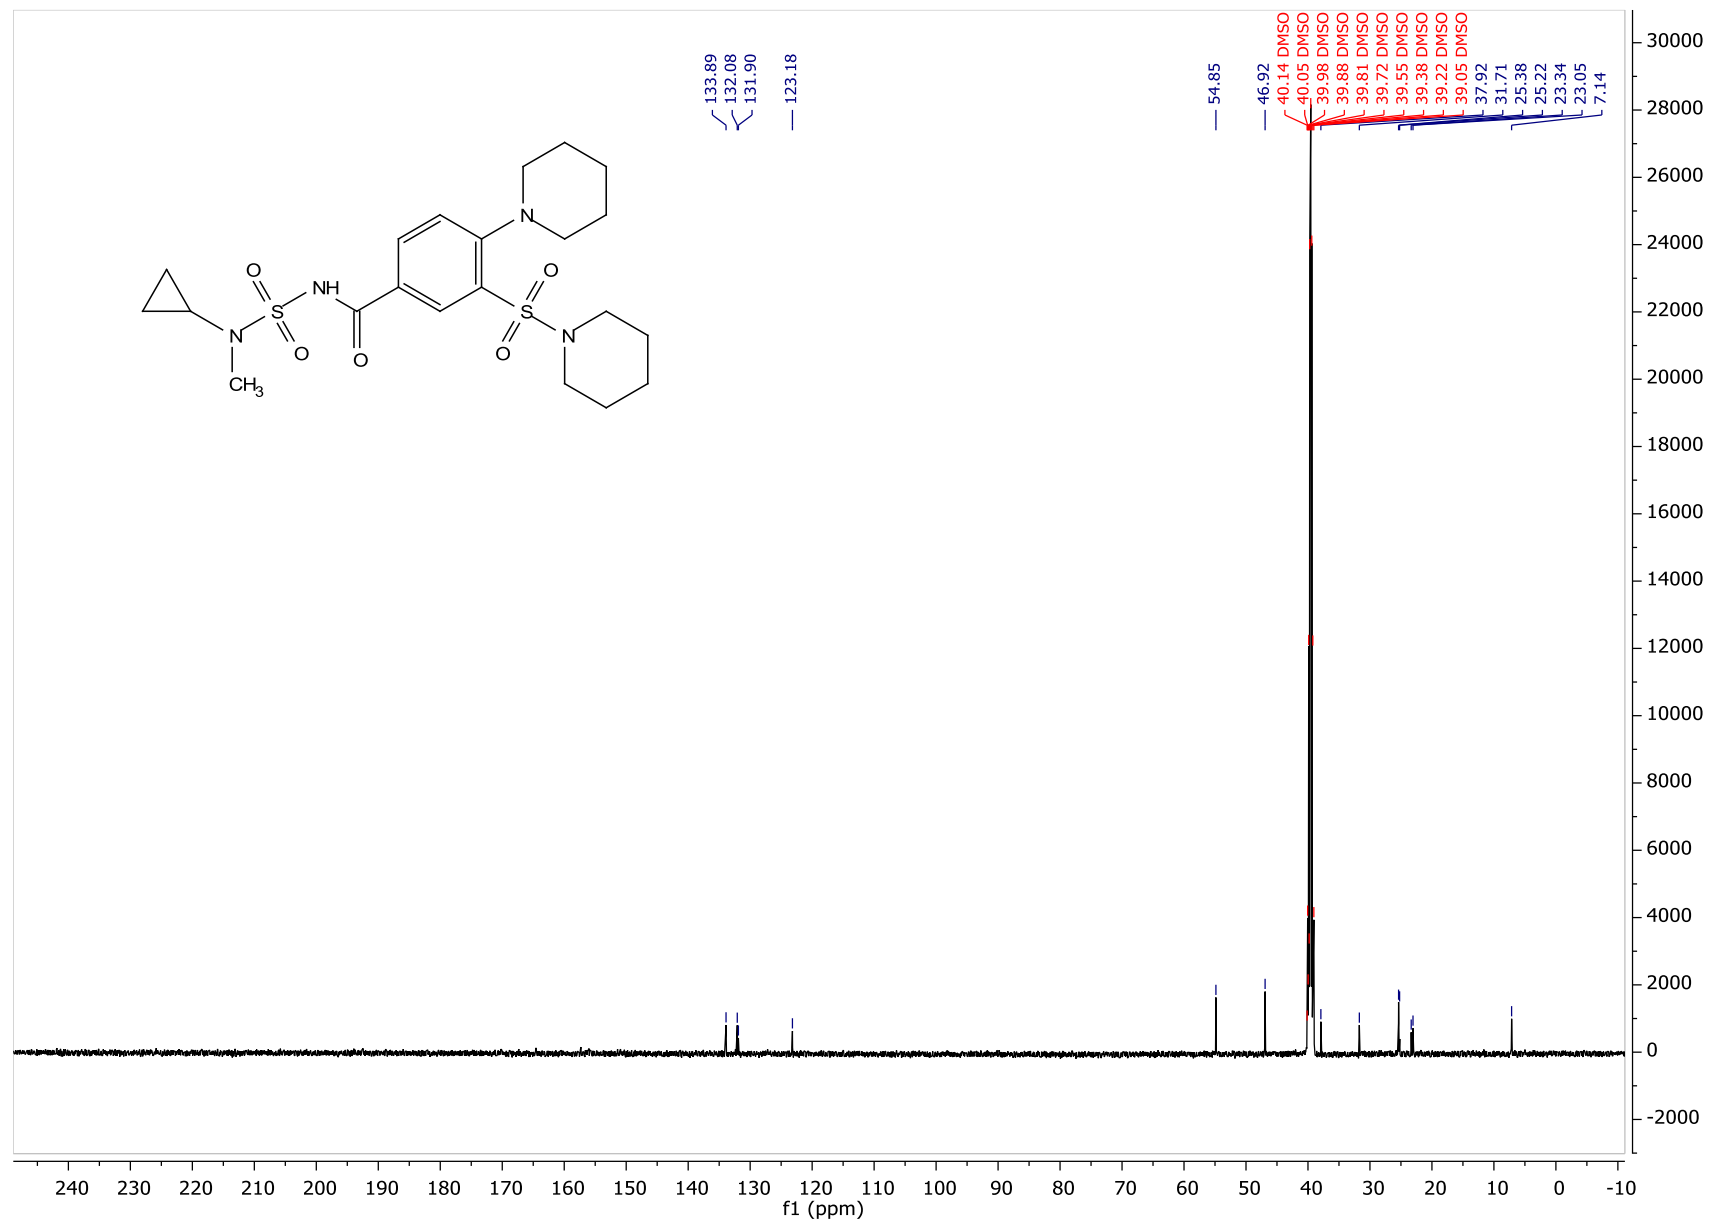

LC/MS spectrum of Z4886816147

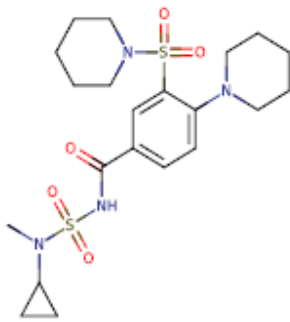

Mol Wt 484.63

Exact Mass 484.21

| # | Time  | Area%  |
|---|-------|--------|
| 1 | 1.437 | 100.00 |

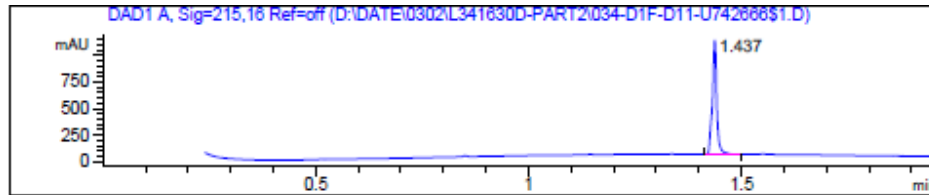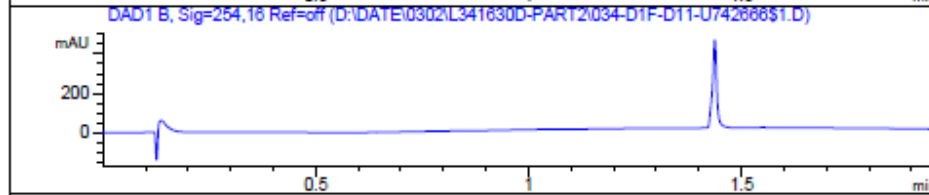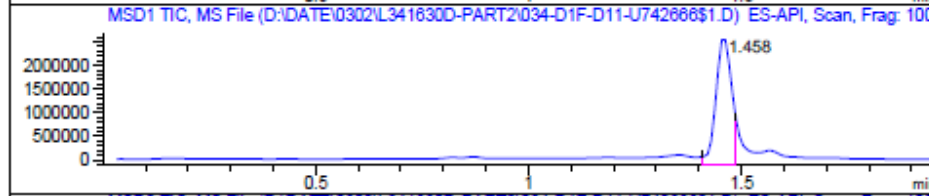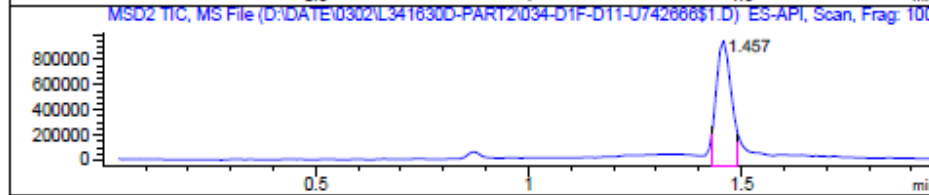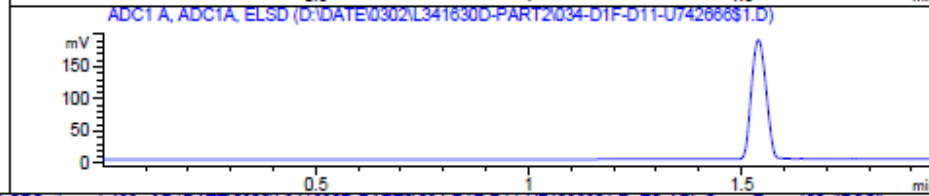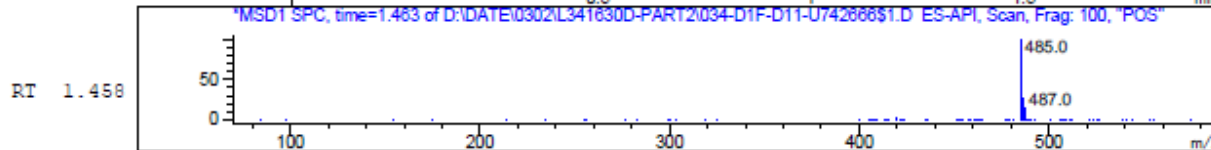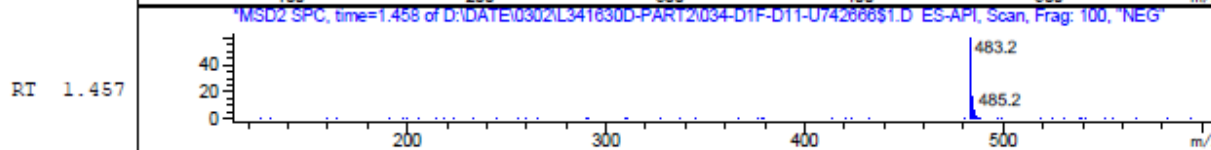

<sup>1</sup>H NMR spectrum of Z4886816160

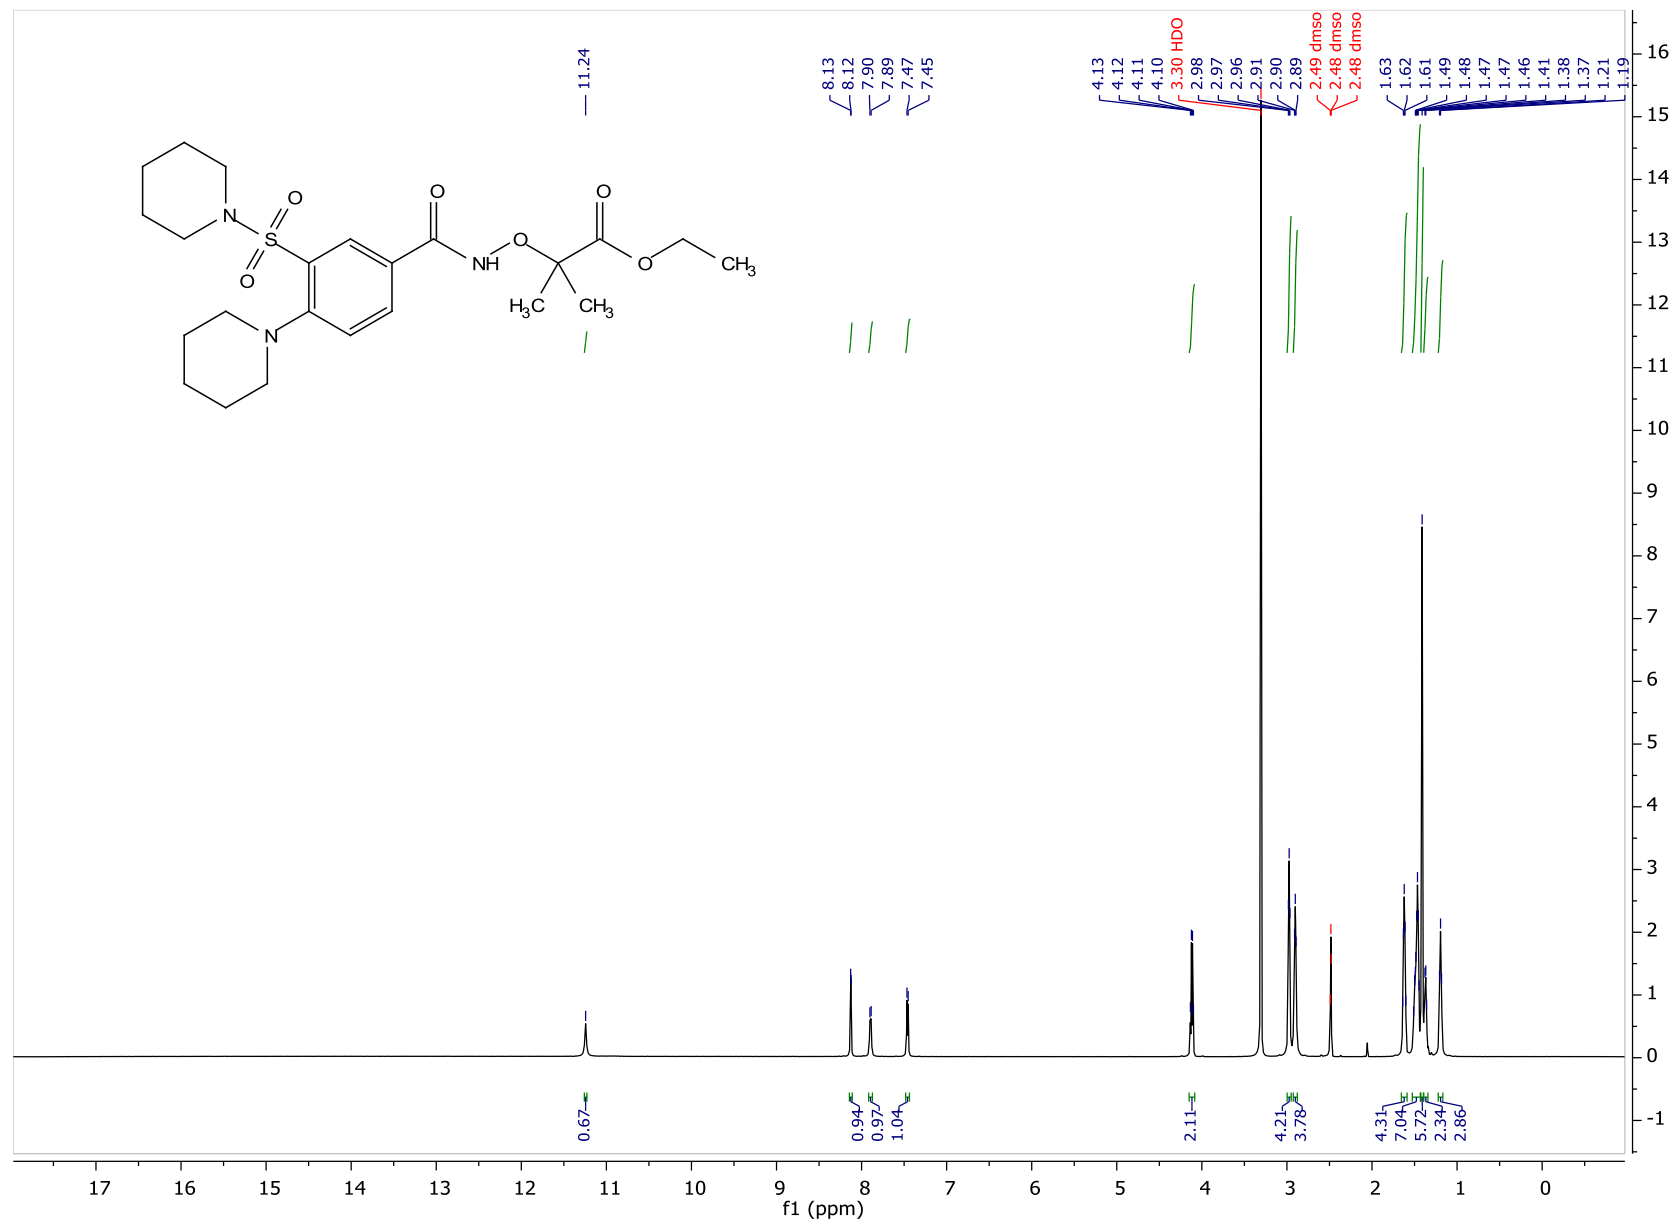



<sup>13</sup>C NMR spectrum of Z4886816160

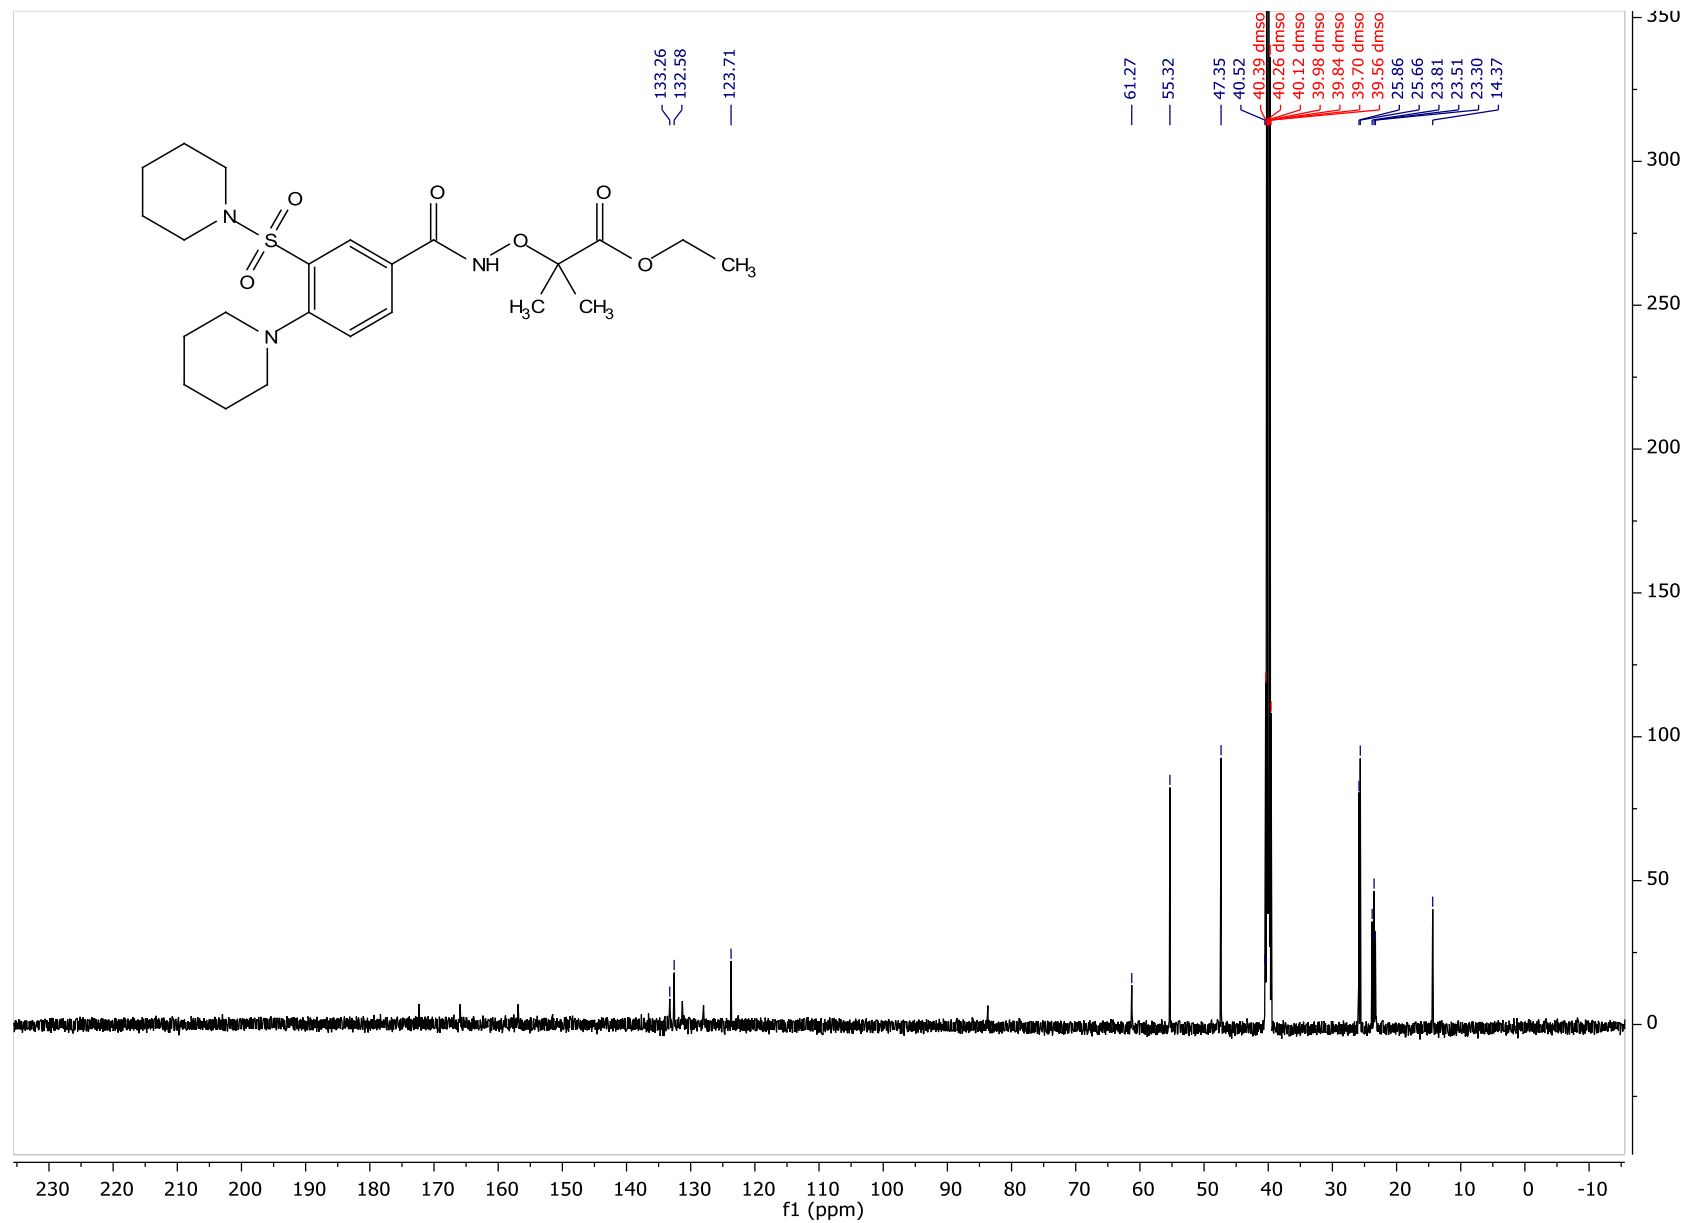

LC/MS spectrum of Z4886816160

Ret\_Time: 1.614 min

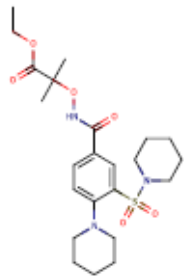

Mol Wt 481.61  
Exact Mass 481.26

| # | Time  | Area%  |
|---|-------|--------|
| 1 | 1.614 | 100.00 |

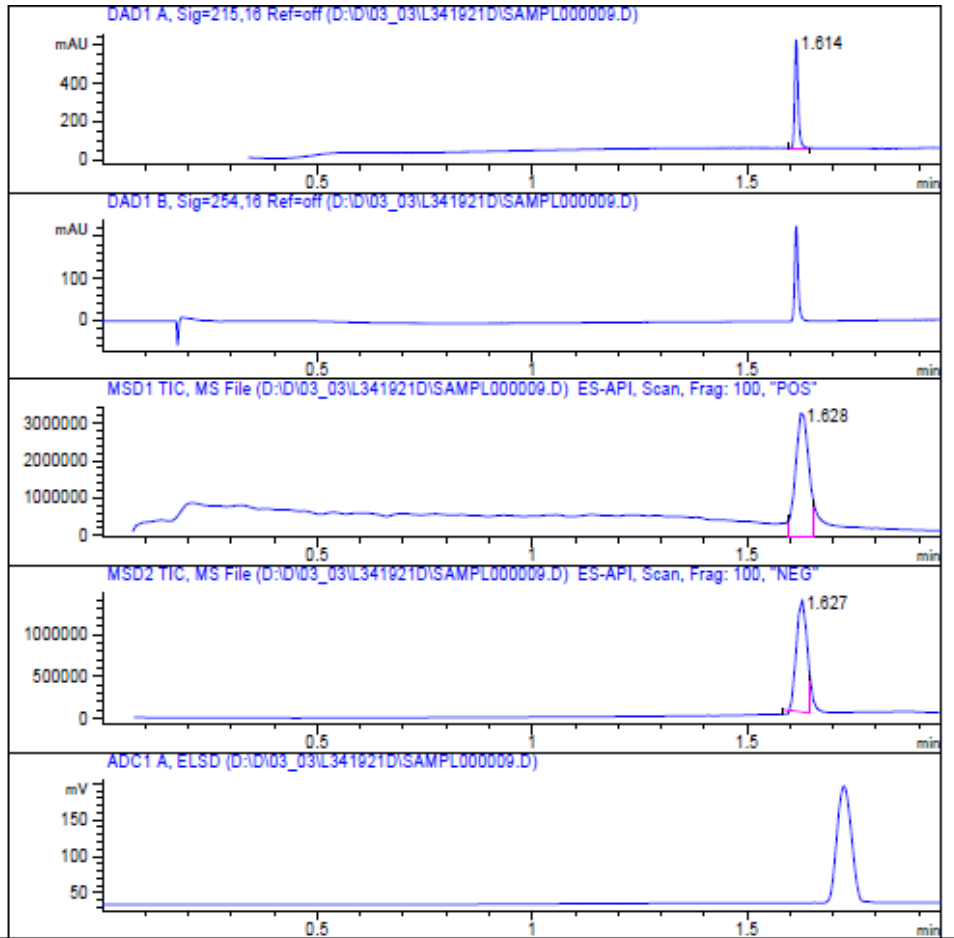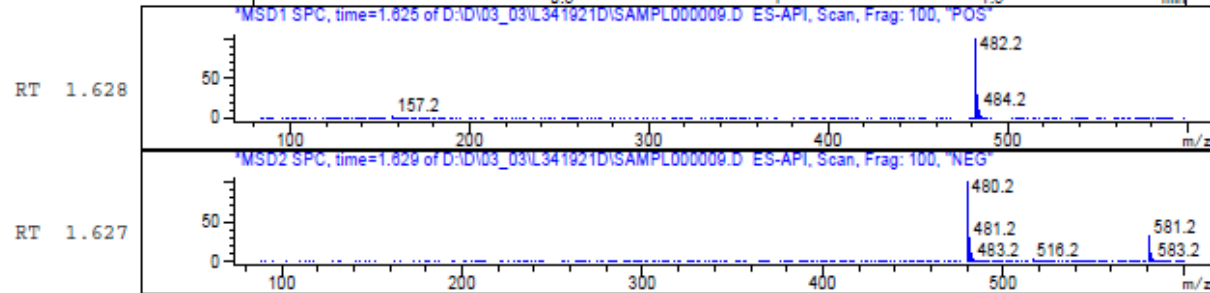

<sup>1</sup>H NMR spectrum of Z4886816179

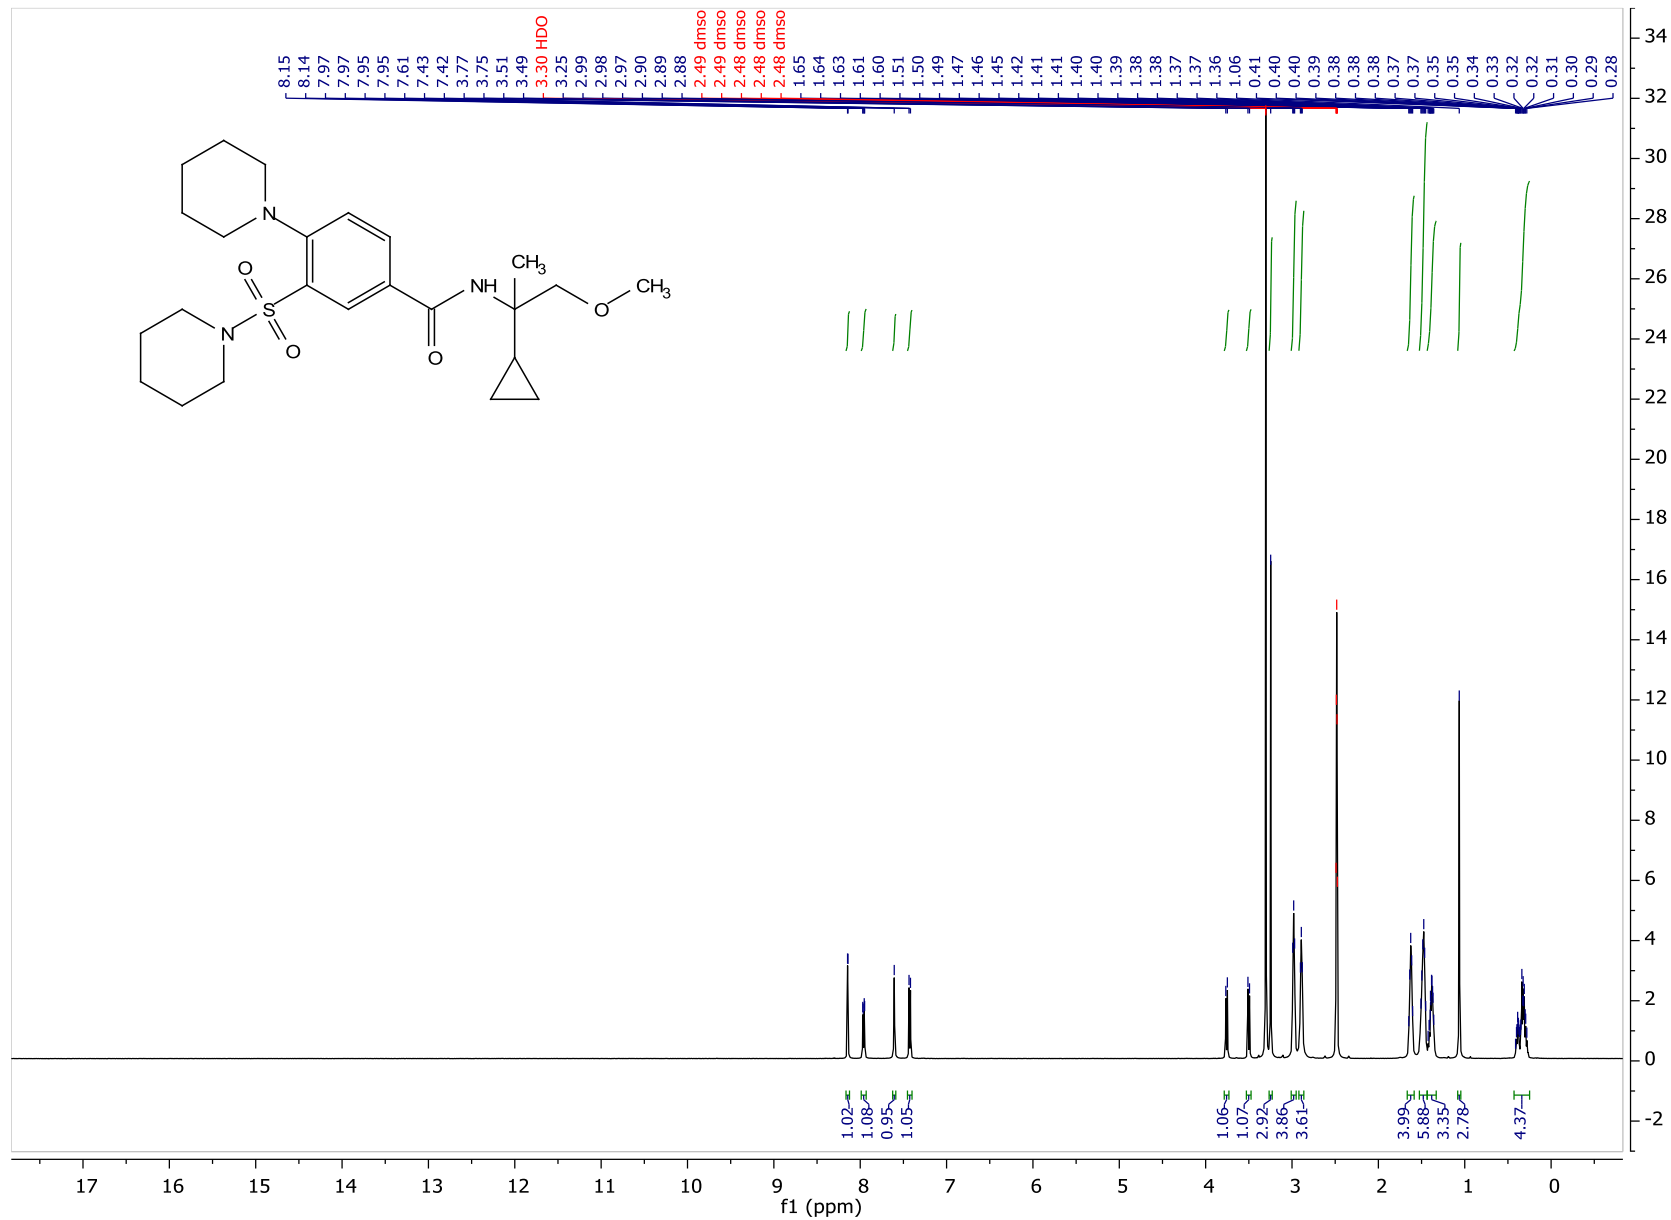

<sup>13</sup>C NMR spectrum of Z4886816179

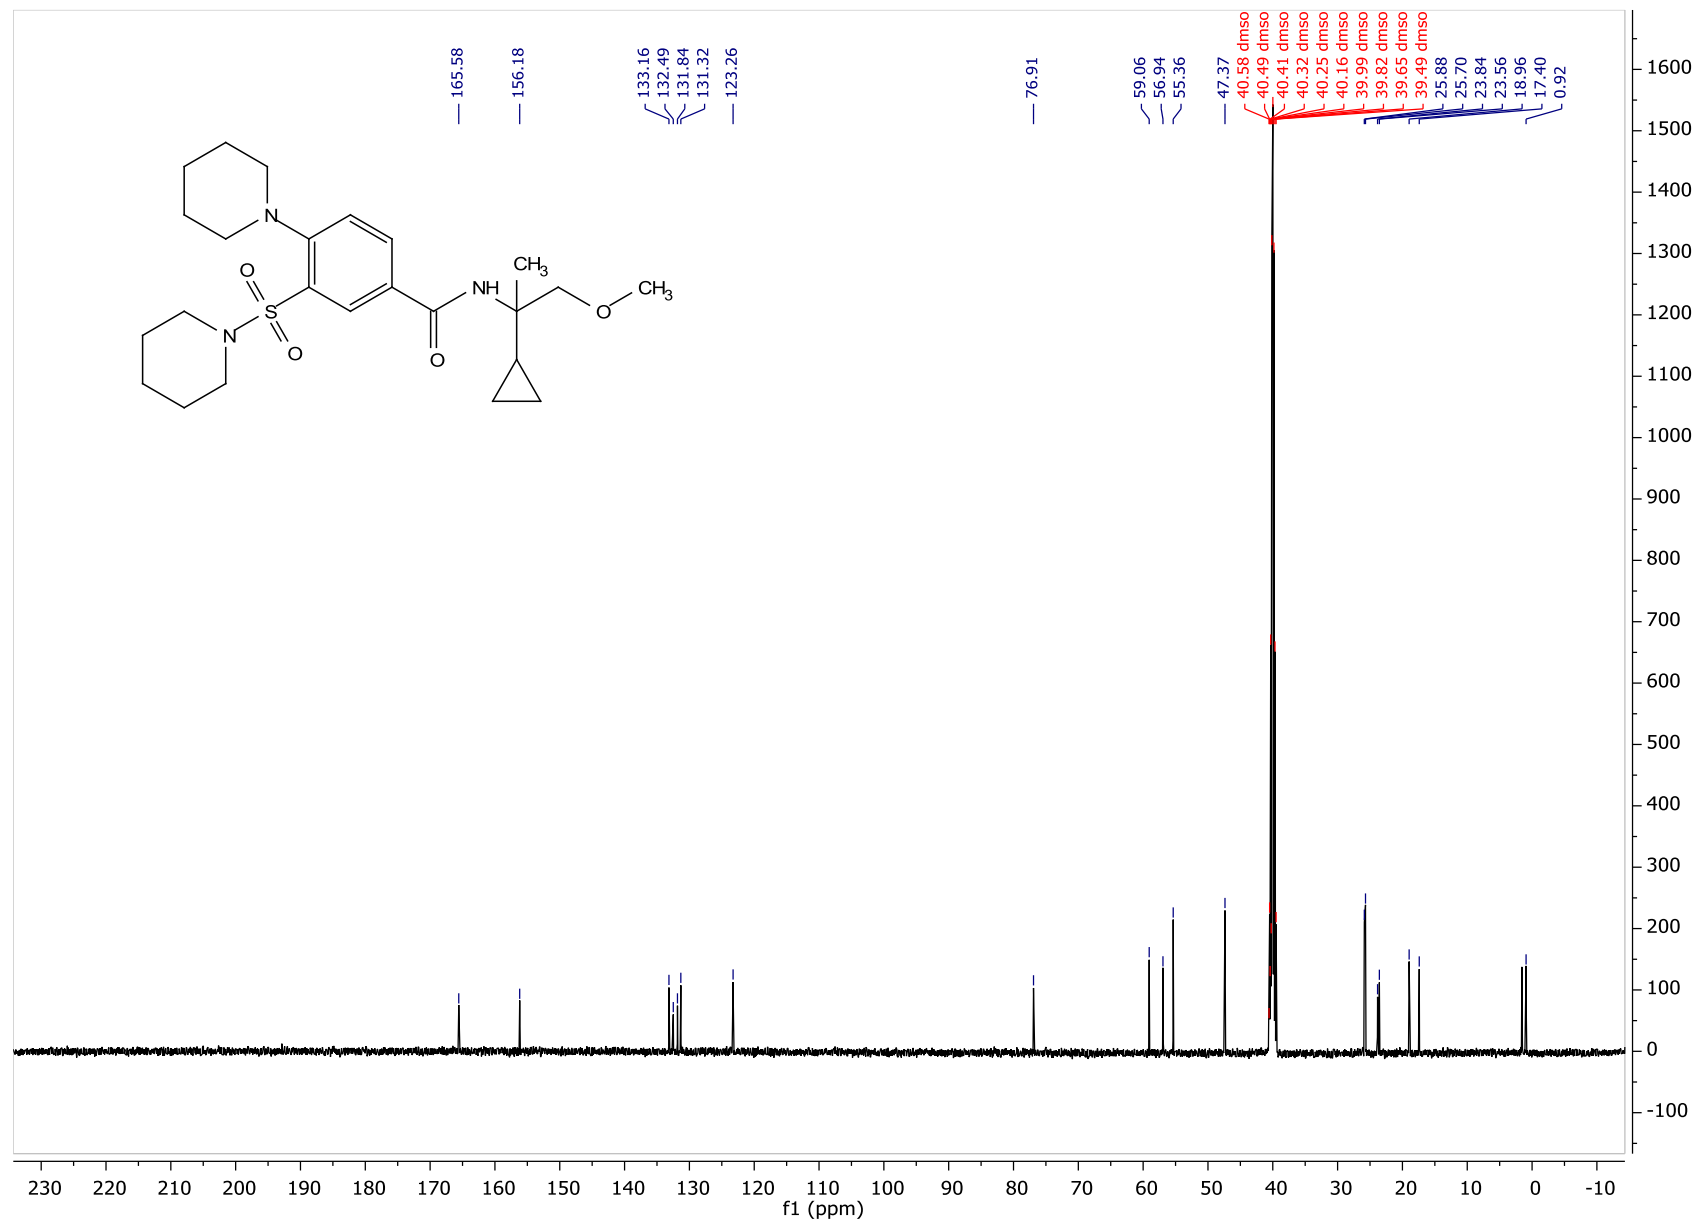

LC/MS spectrum of Z4886816179

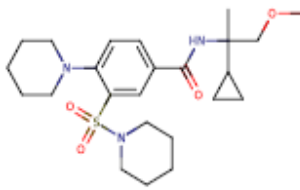

Mol Wt 463.63  
 Exact Mass 463.3  

| # | Time  | Area%  |
|---|-------|--------|
| 1 | 1.424 | 100.00 |

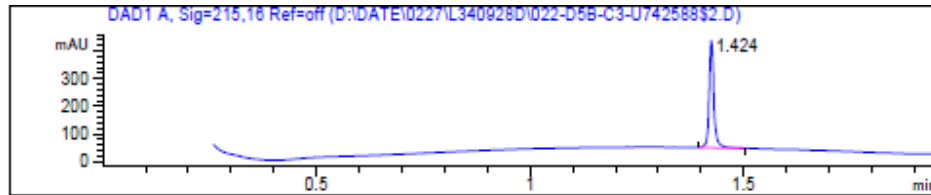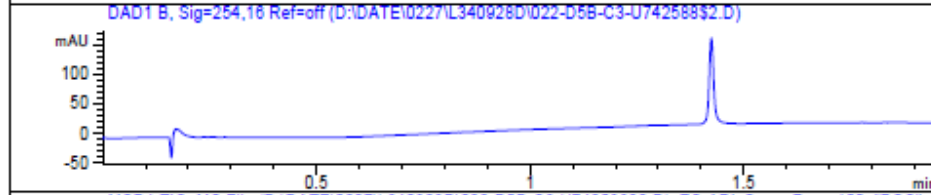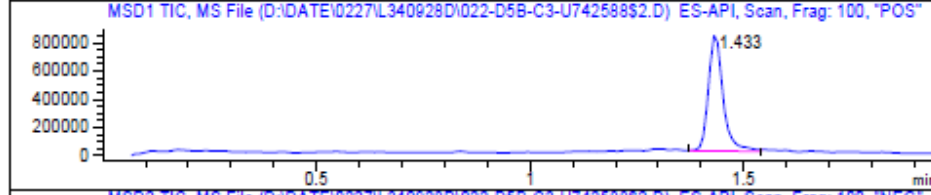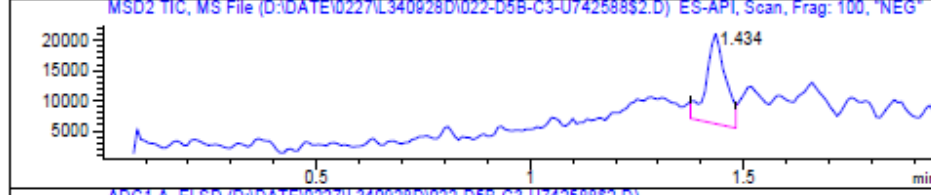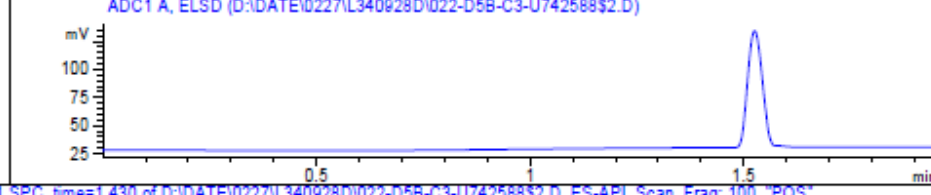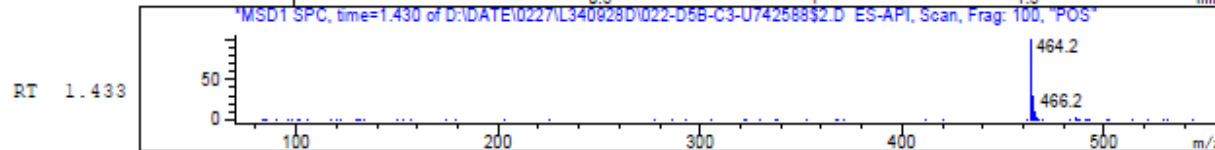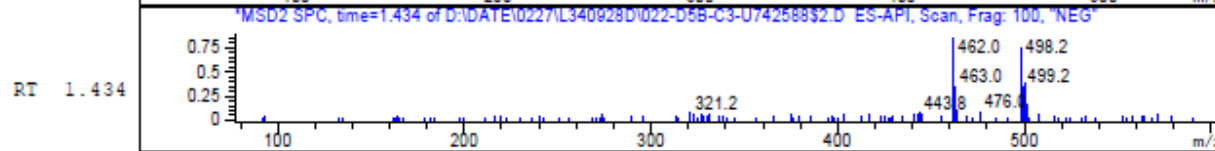

<sup>1</sup>H NMR spectrum of Z4886816304

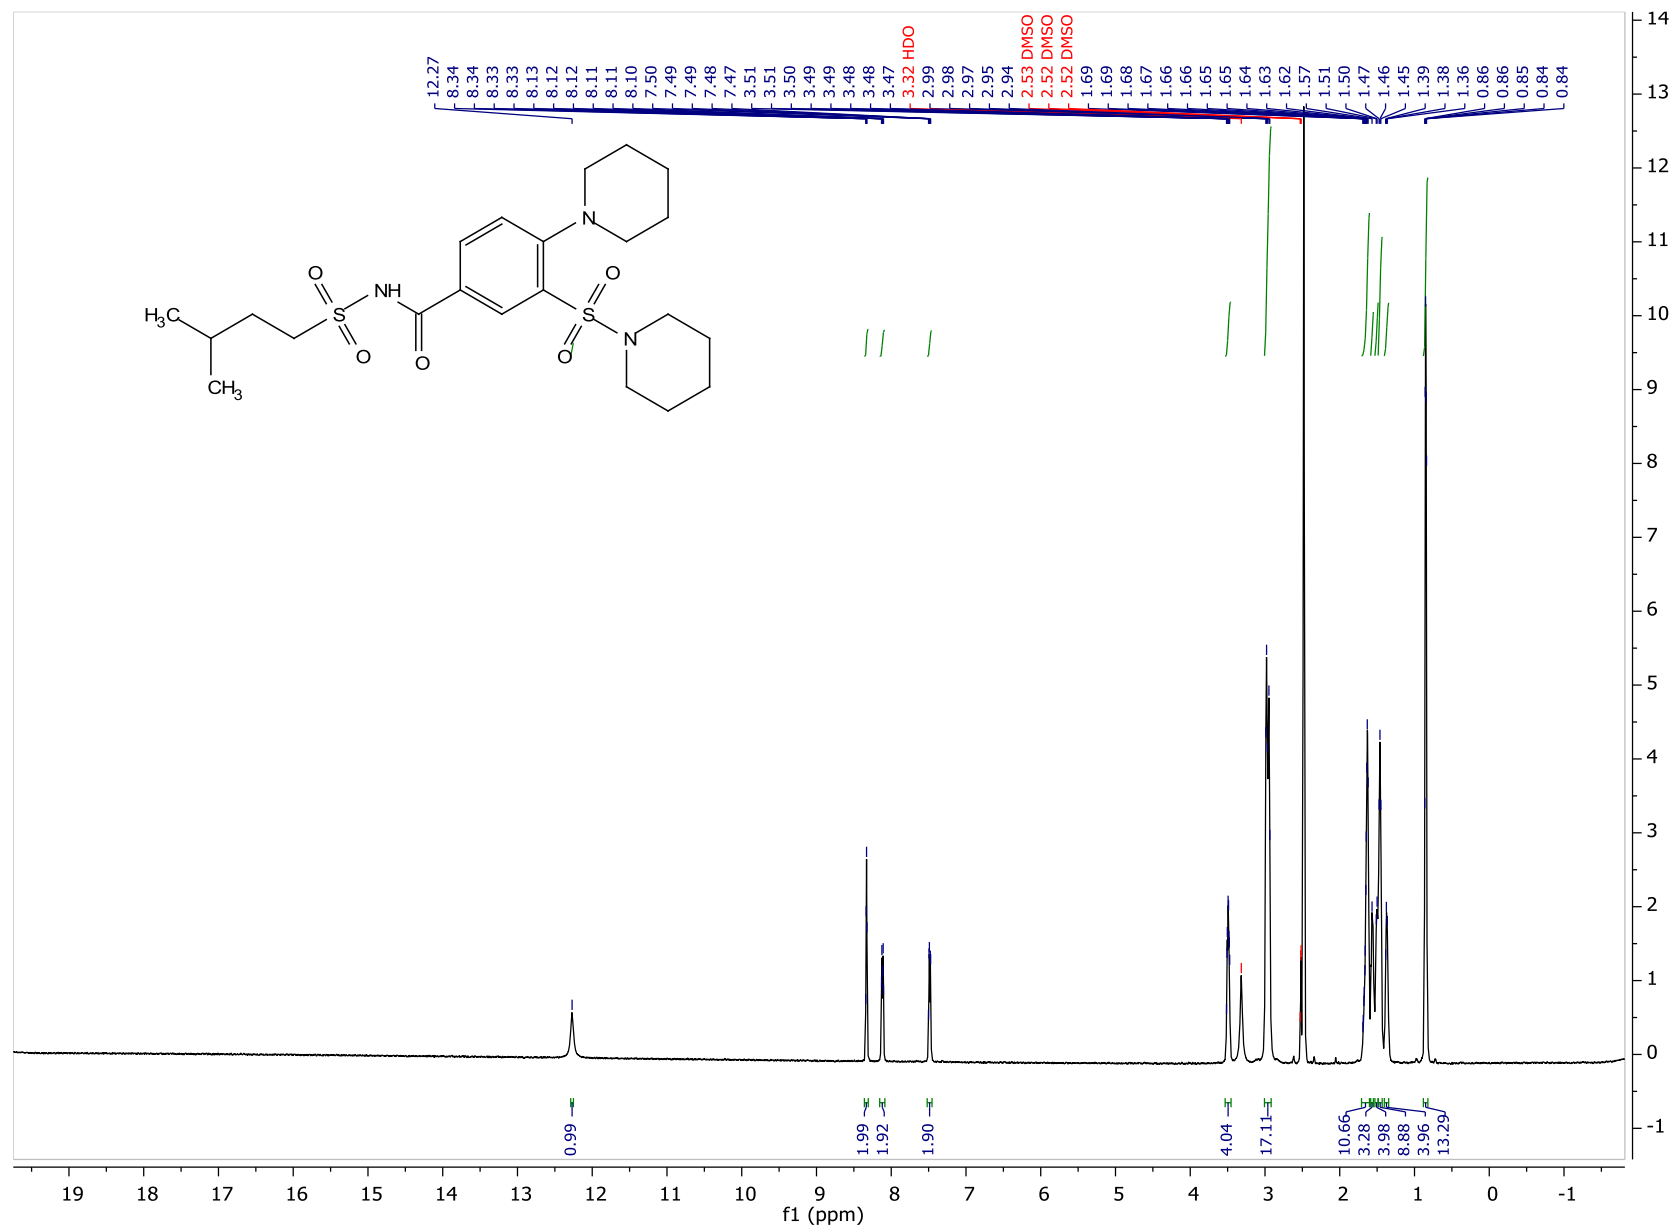

<sup>13</sup>C NMR spectrum of Z4886816304

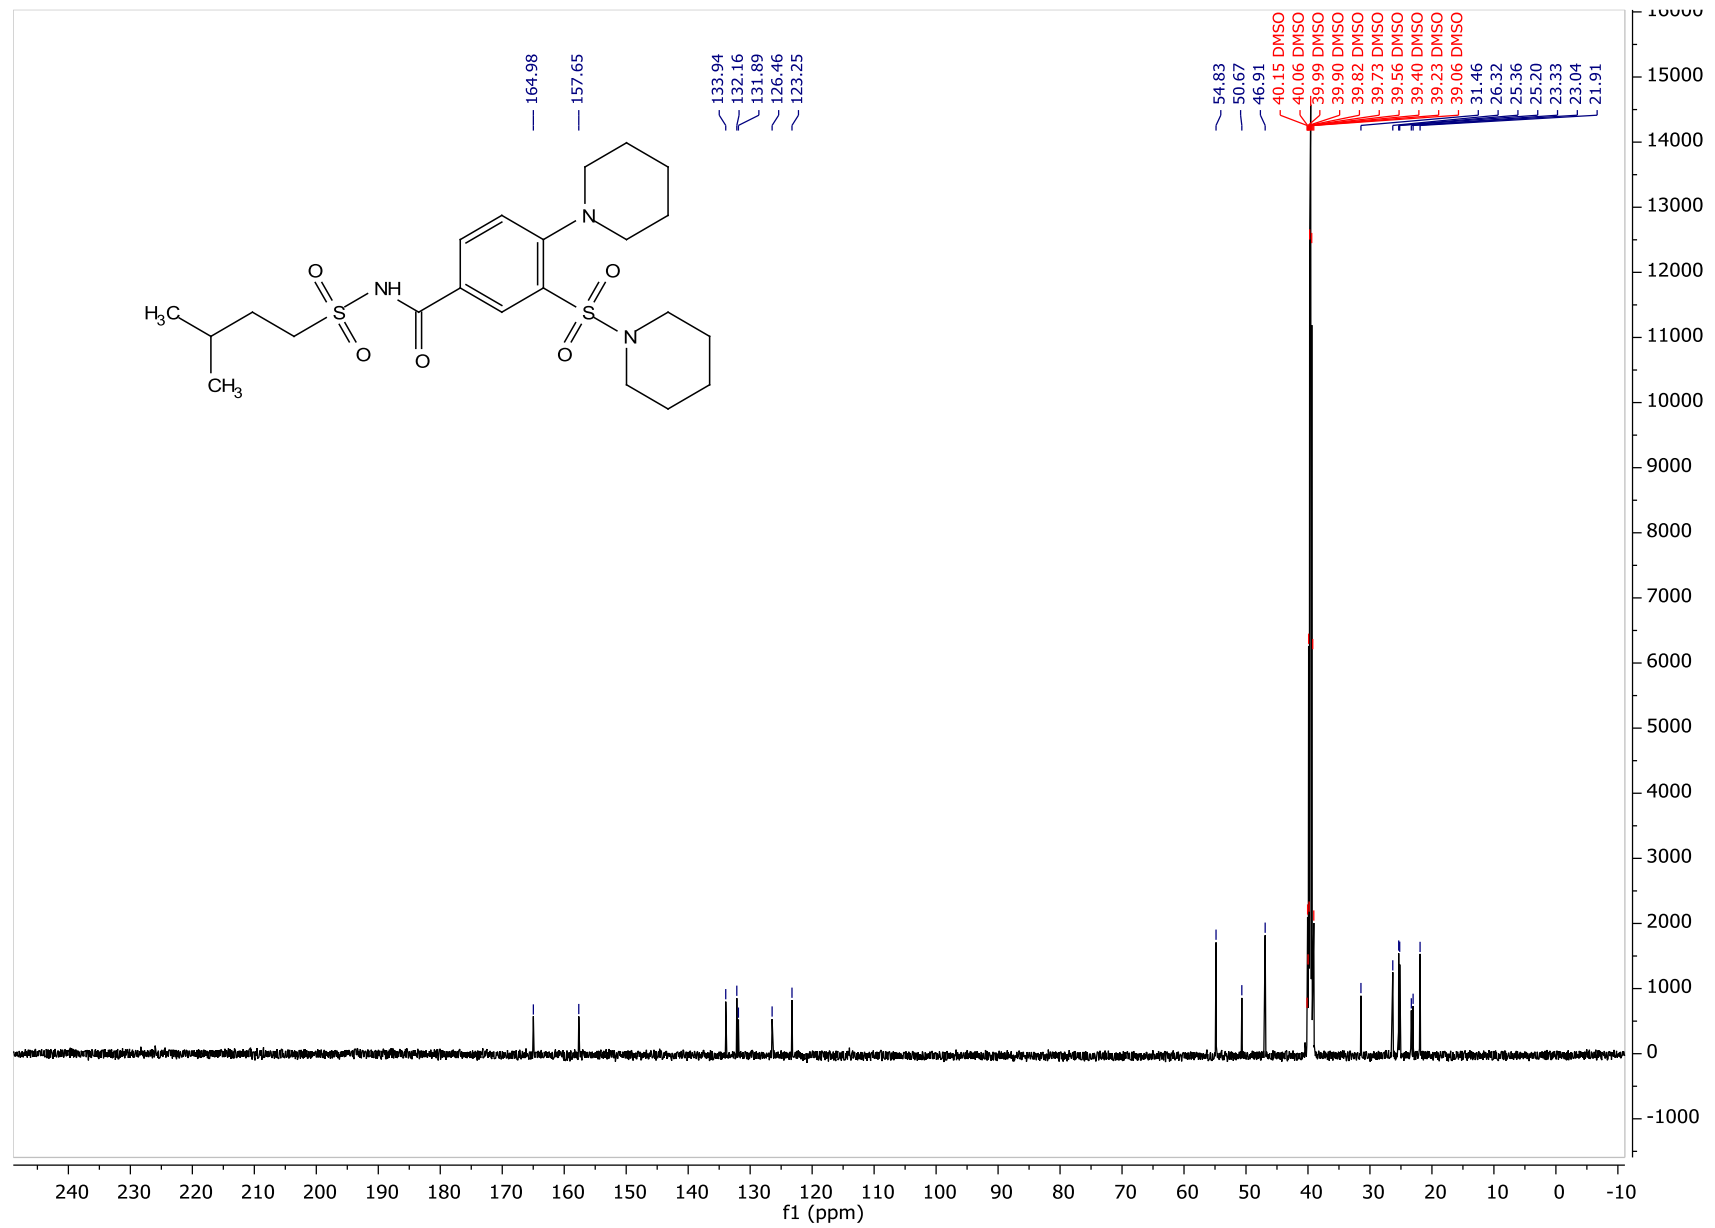

LC/MS spectrum of Z4886816202

Ret\_Time: 1.646 min

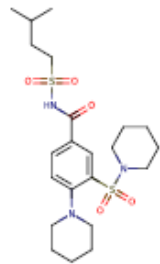

Mol Wt 485.66

Exact Mass 485.24

| # | Time  | Area% |
|---|-------|-------|
| 1 | 1.359 | 2.68  |
| 2 | 1.437 | 2.30  |
| 3 | 1.632 | 1.54  |
| 4 | 1.646 | 93.48 |

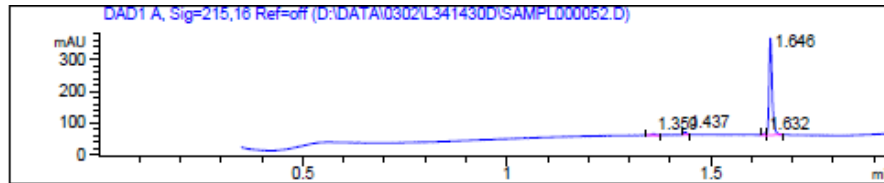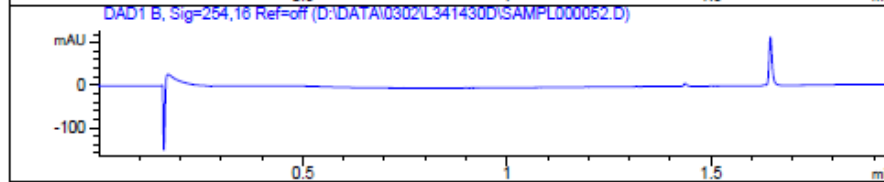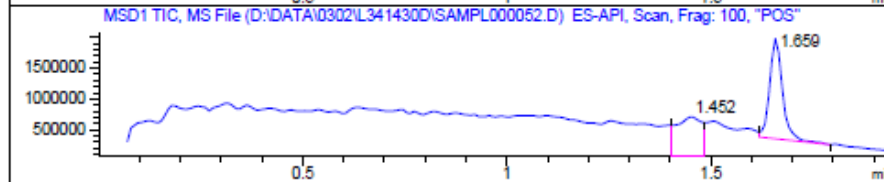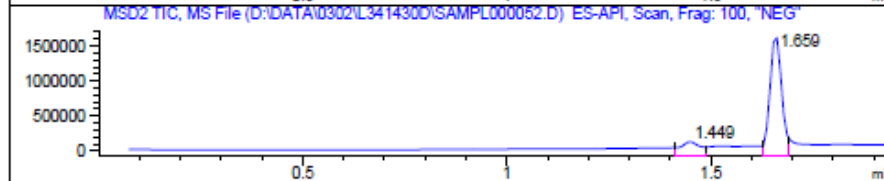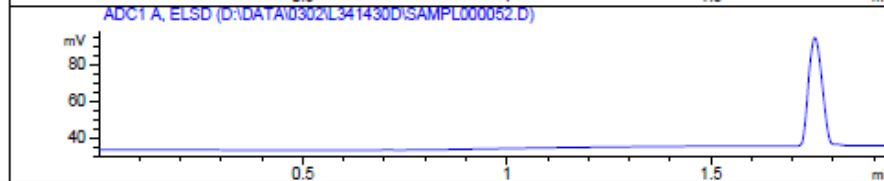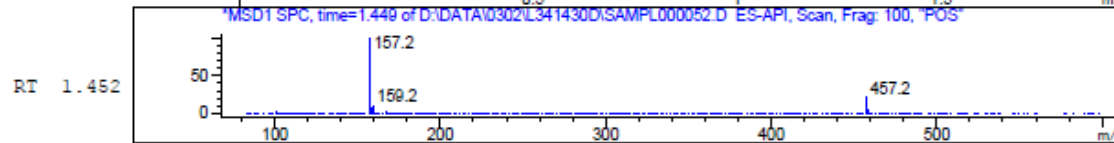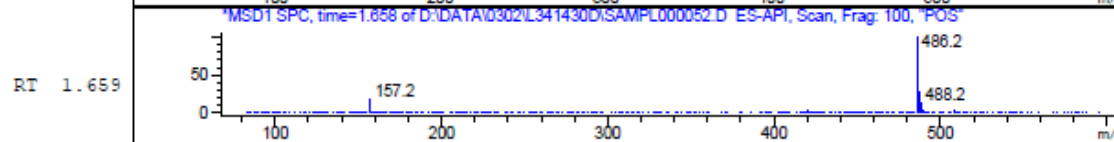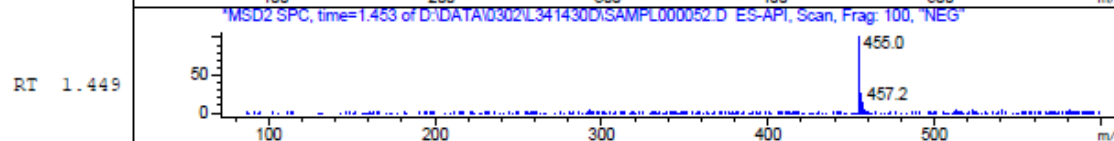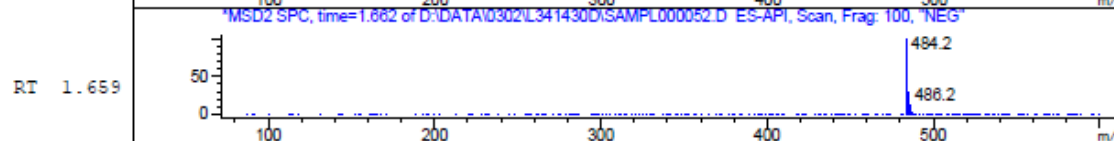



<sup>1</sup>H NMR spectrum of Z4886816208

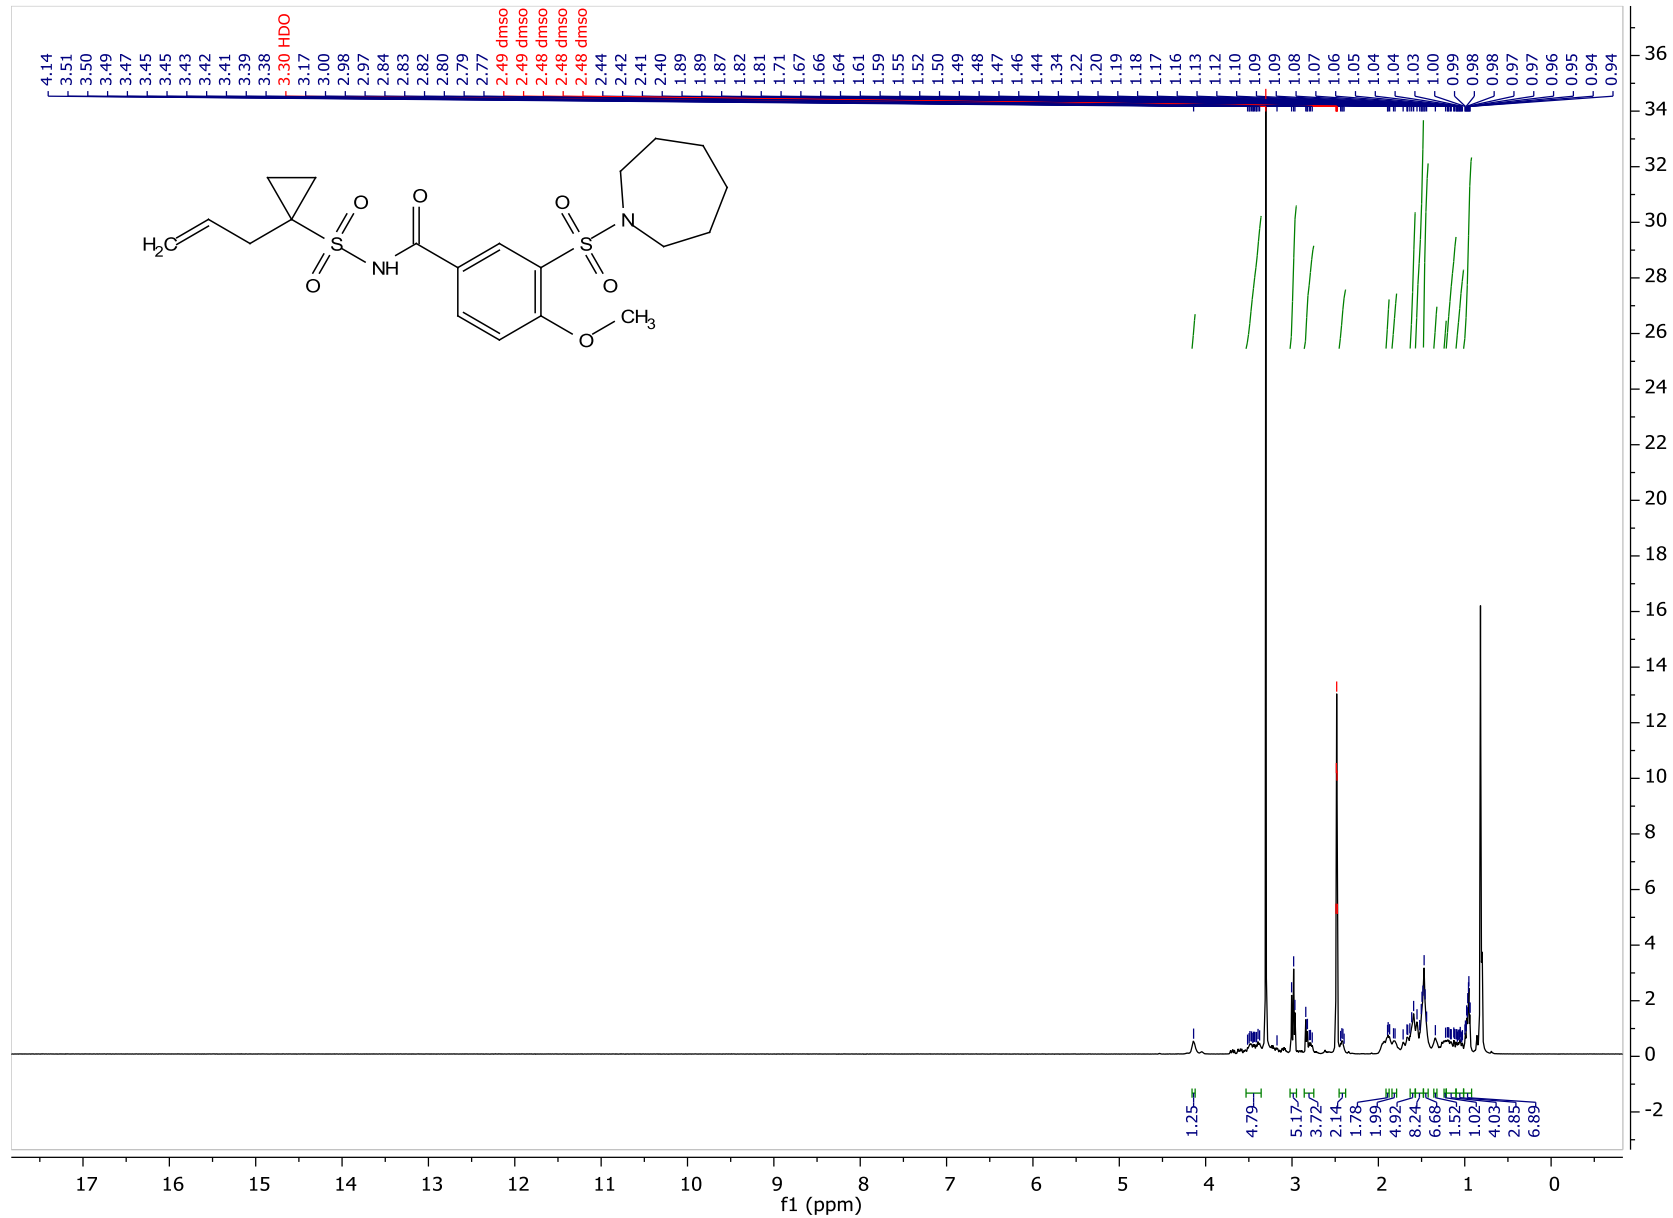

<sup>13</sup>C NMR spectrum of Z4886816208

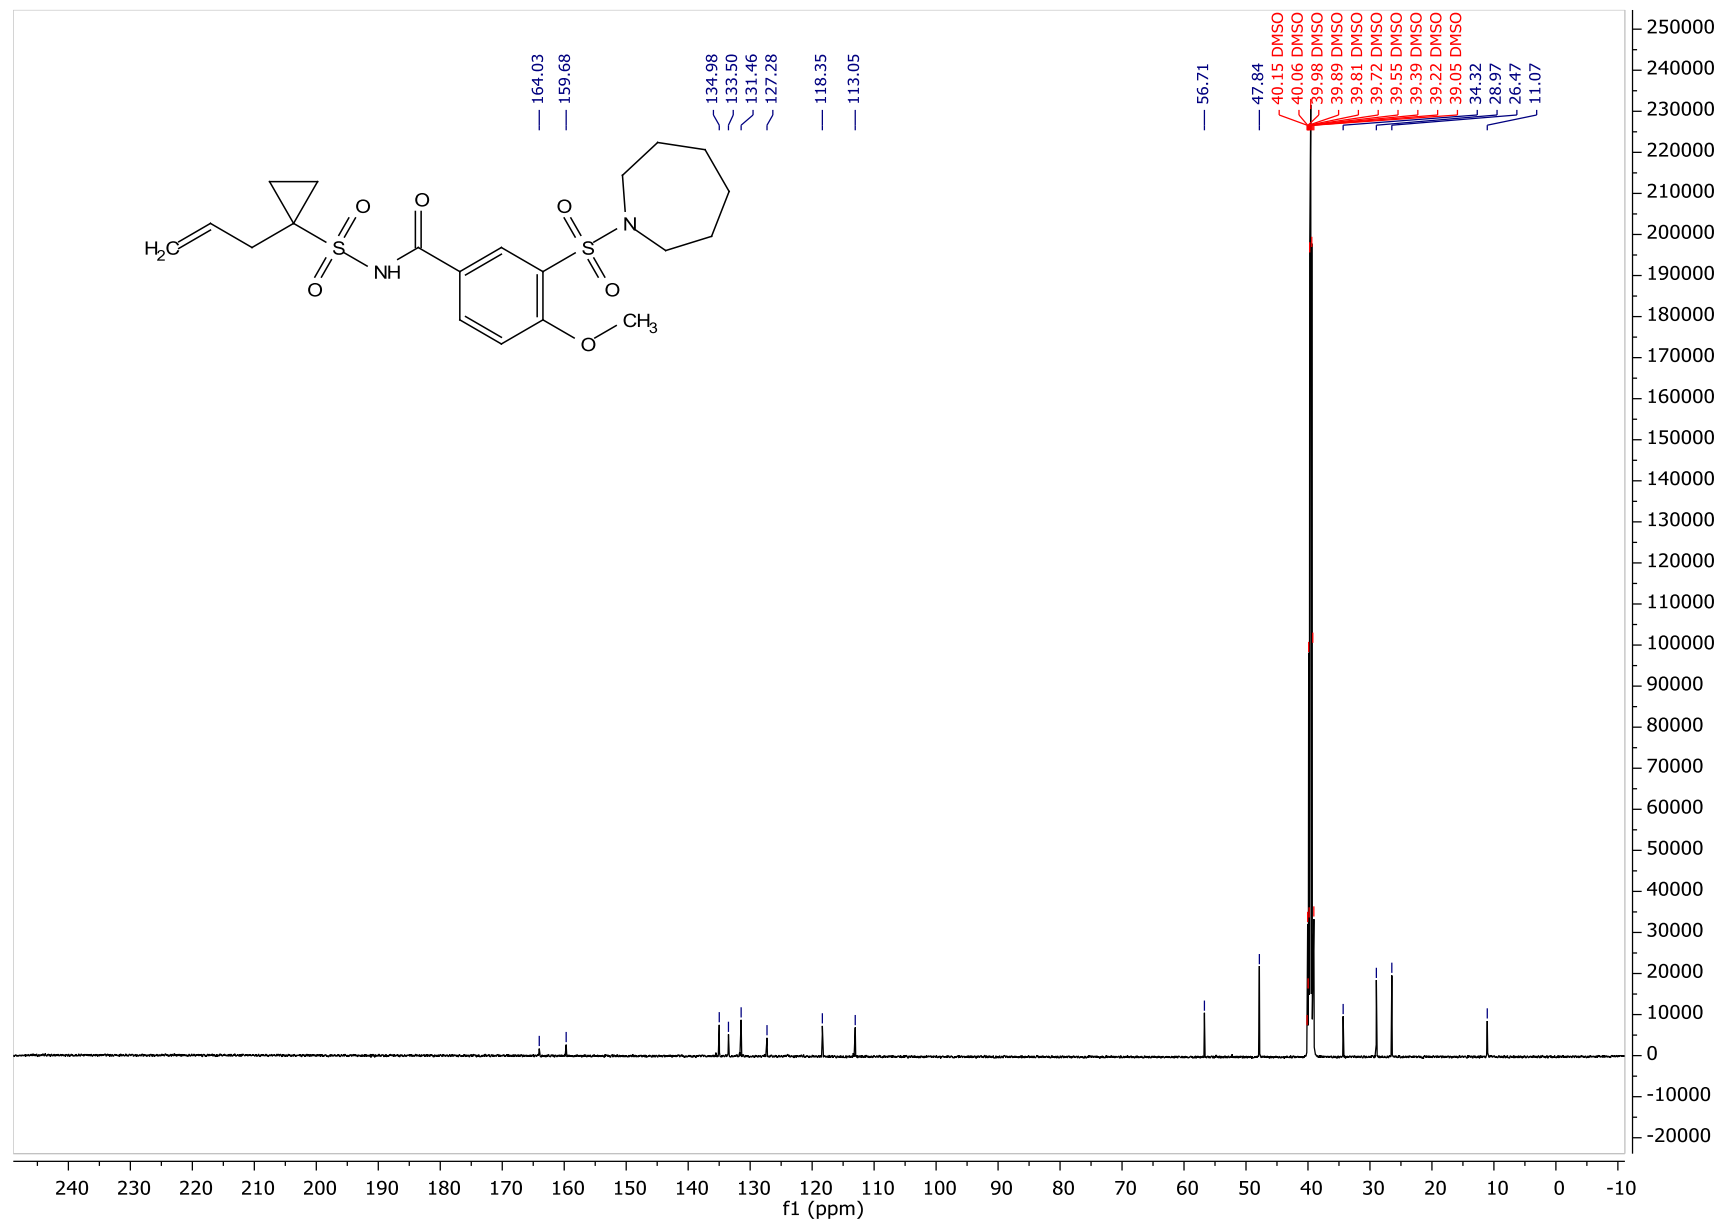

LC/MS spectrum of Z4886816208

Ret\_Time: 1.438 min

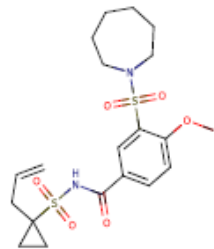

Mol Wt 456.58  
Exact Mass 456.16

| # | Time  | Area% |
|---|-------|-------|
| 1 | 1.361 | 1.93  |
| 2 | 1.438 | 96.42 |
| 3 | 1.590 | 1.65  |

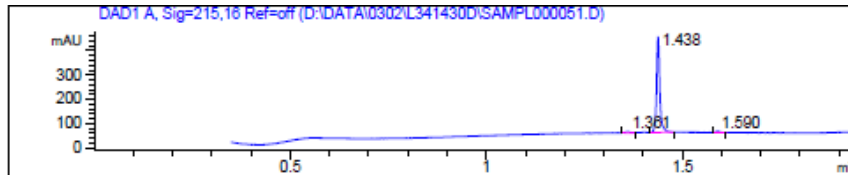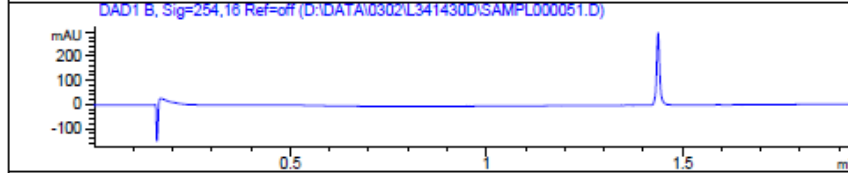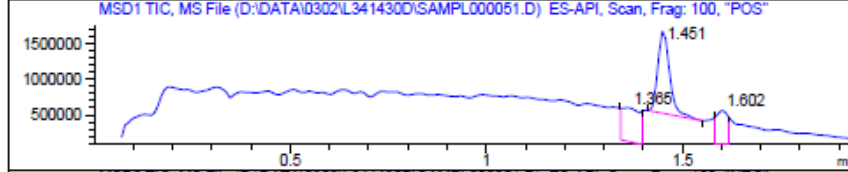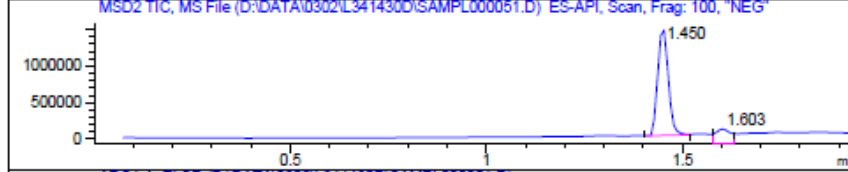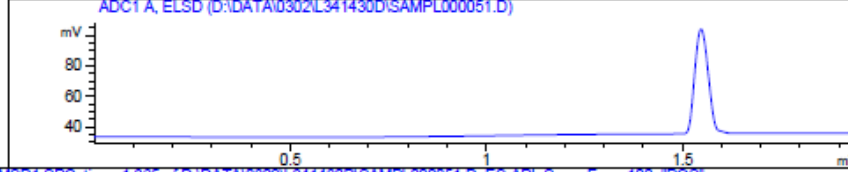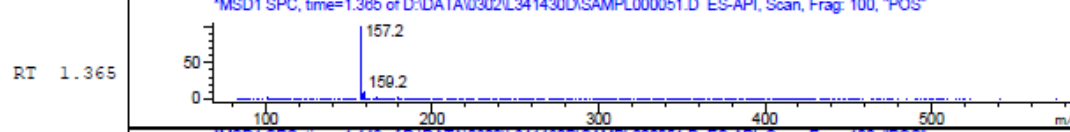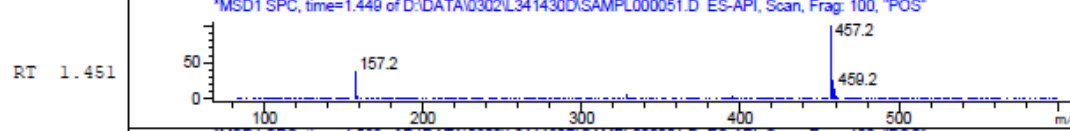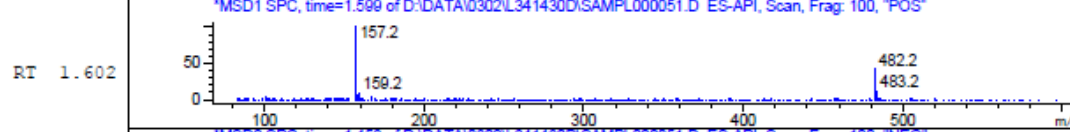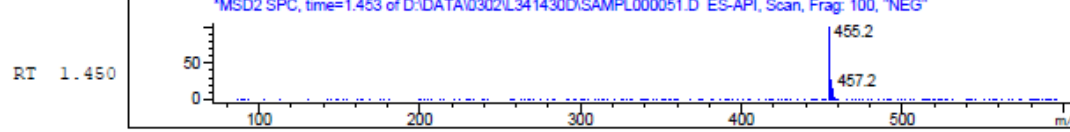

<sup>1</sup>H NMR spectrum of Z4886816220

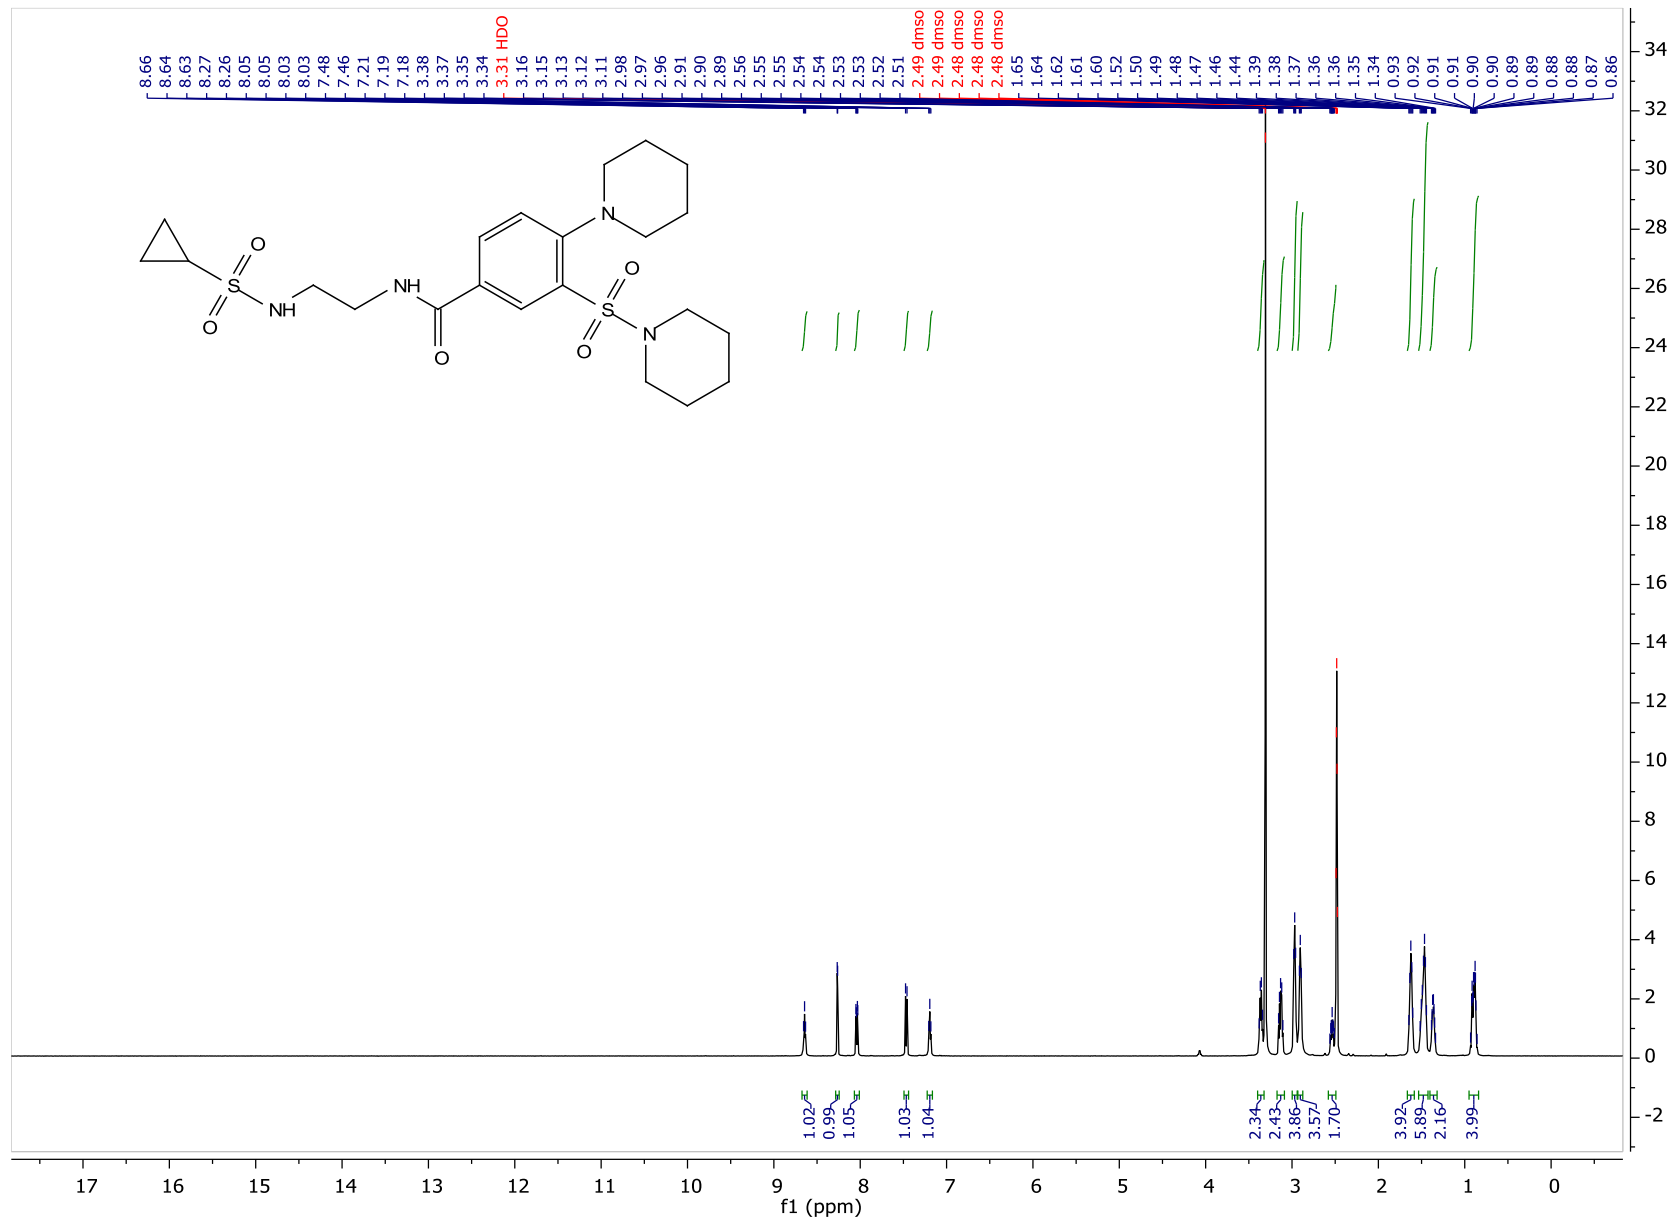

<sup>13</sup>C NMR spectrum of Z4886816220

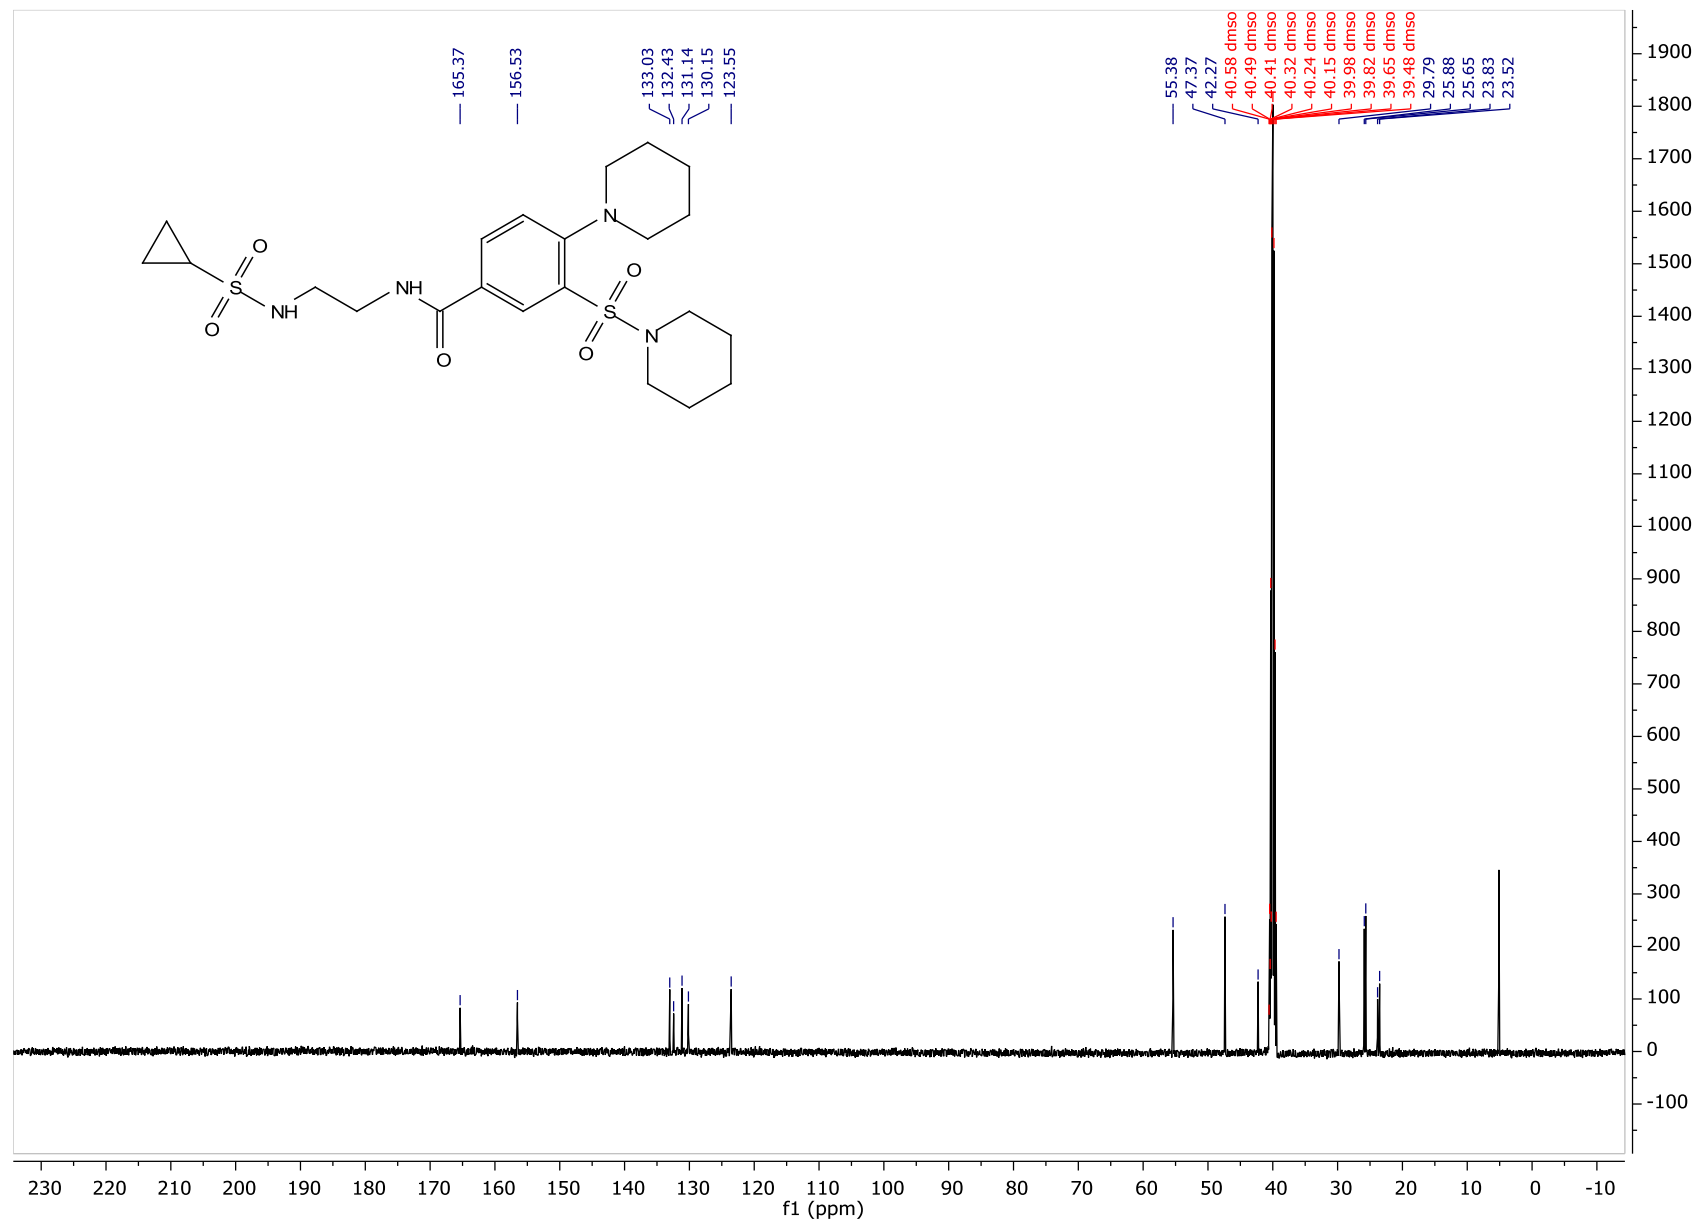

LC/MS spectrum of Z4886816220

Ret\_Time: 1.395 min

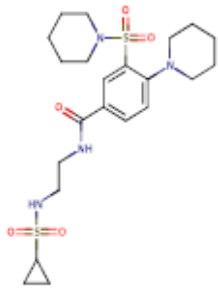

Mol Wt 498.66  
Exact Mass 498.23

| # | Time  | Area%  |
|---|-------|--------|
| 1 | 1.395 | 100.00 |

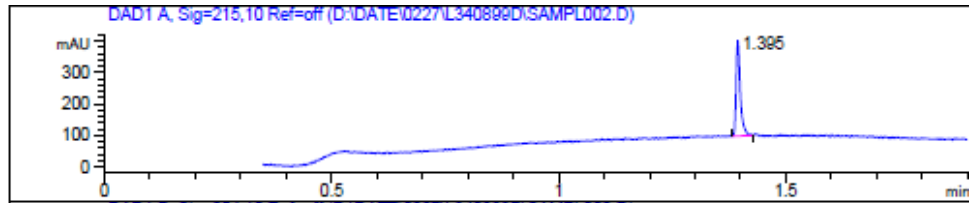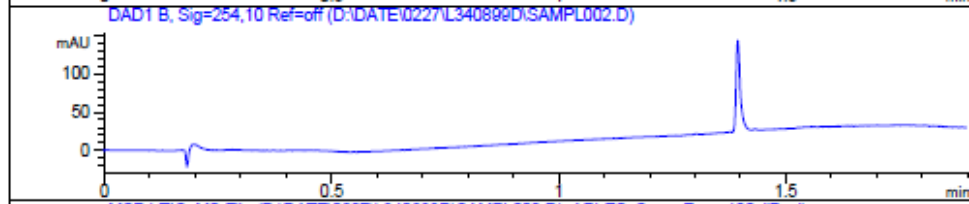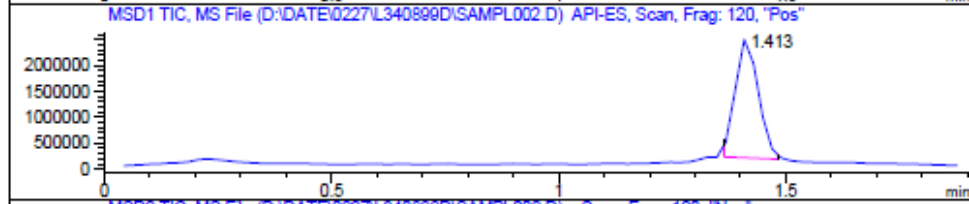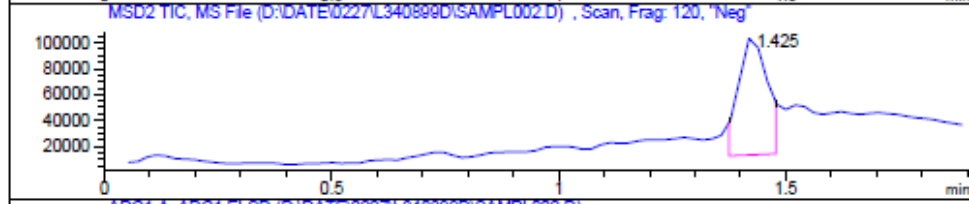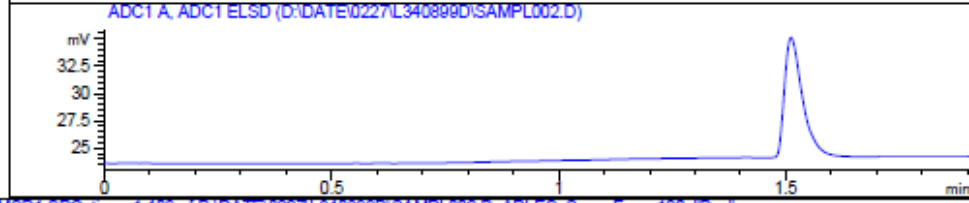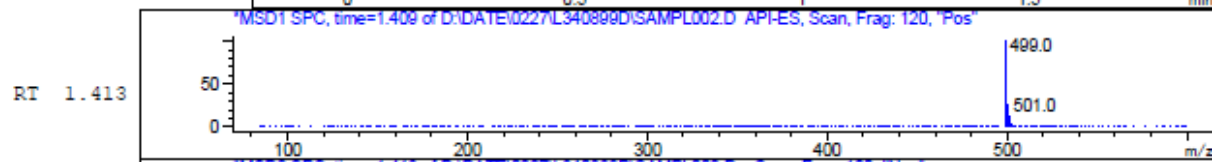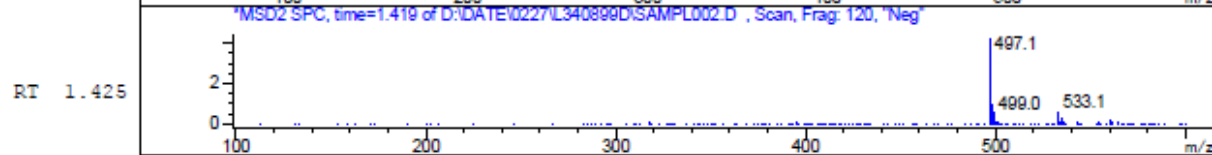

<sup>1</sup>H NMR spectrum of Z4886816226

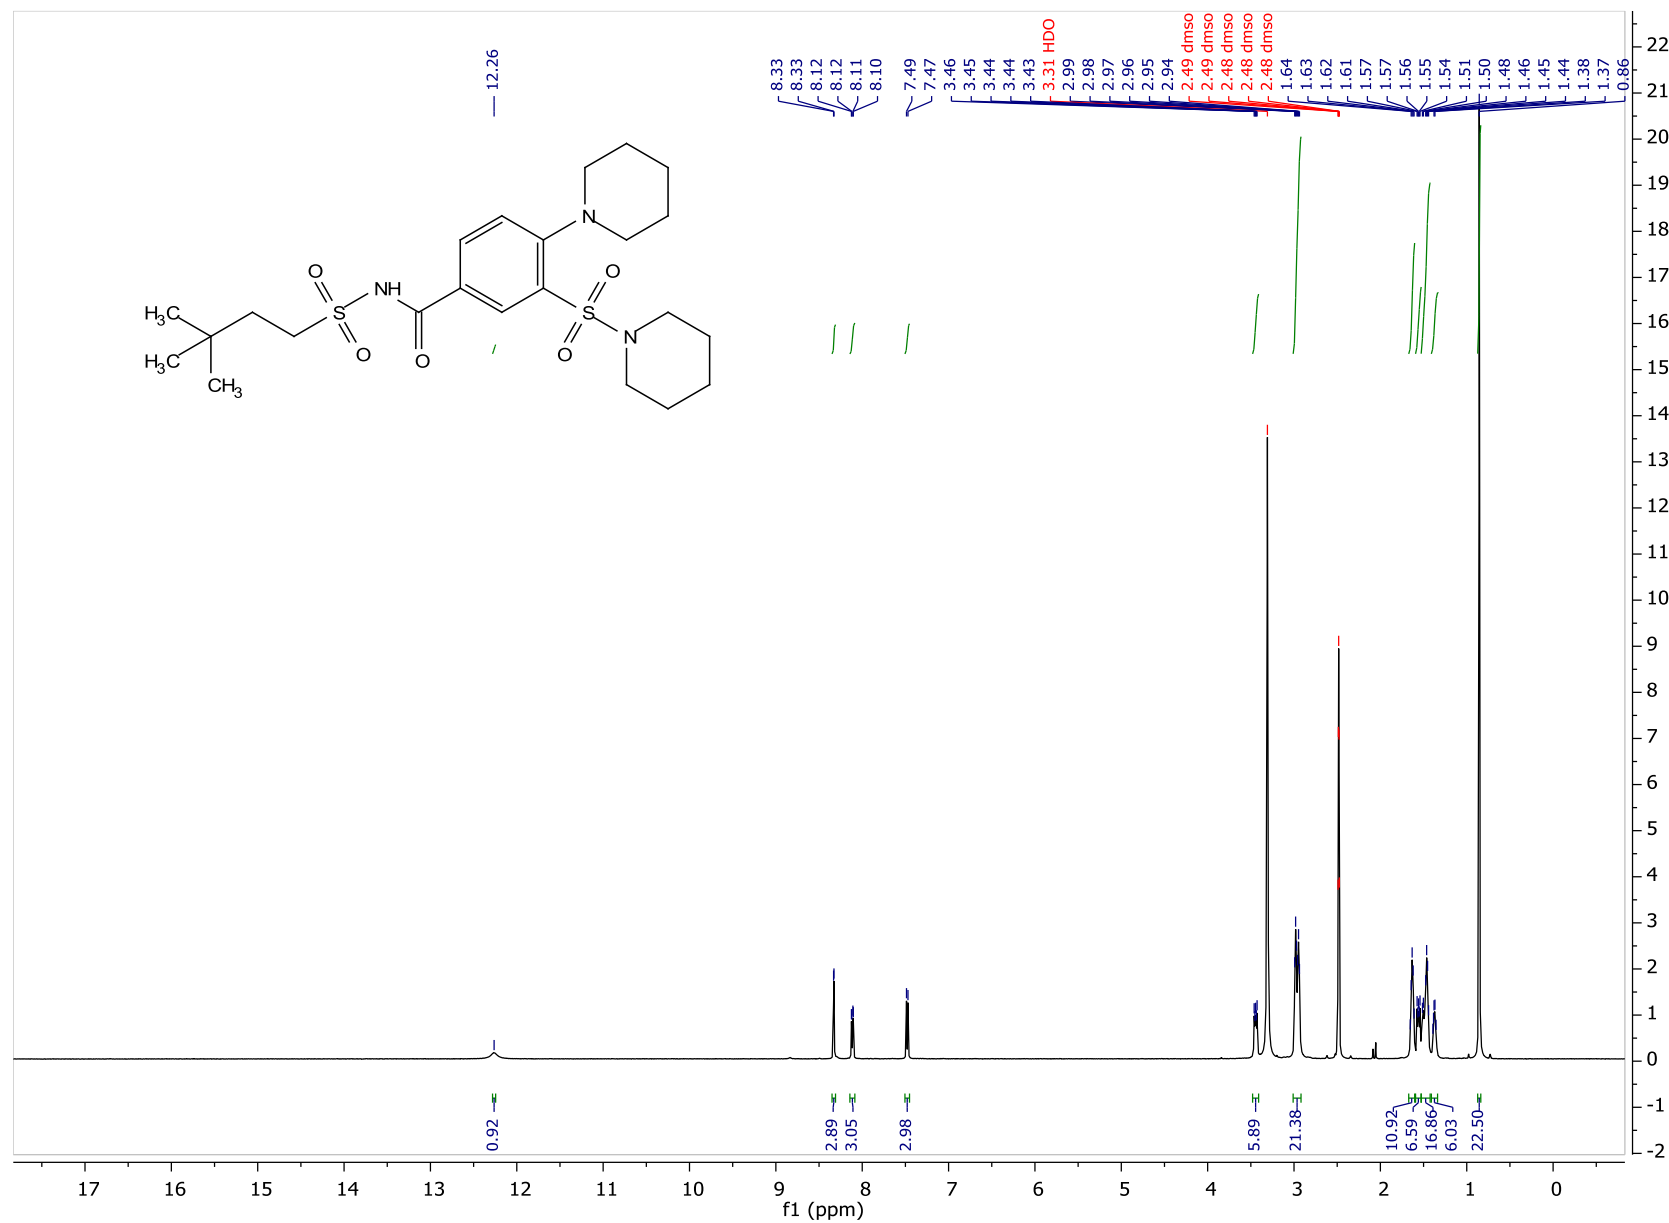

<sup>13</sup>C NMR spectrum of Z4886816226

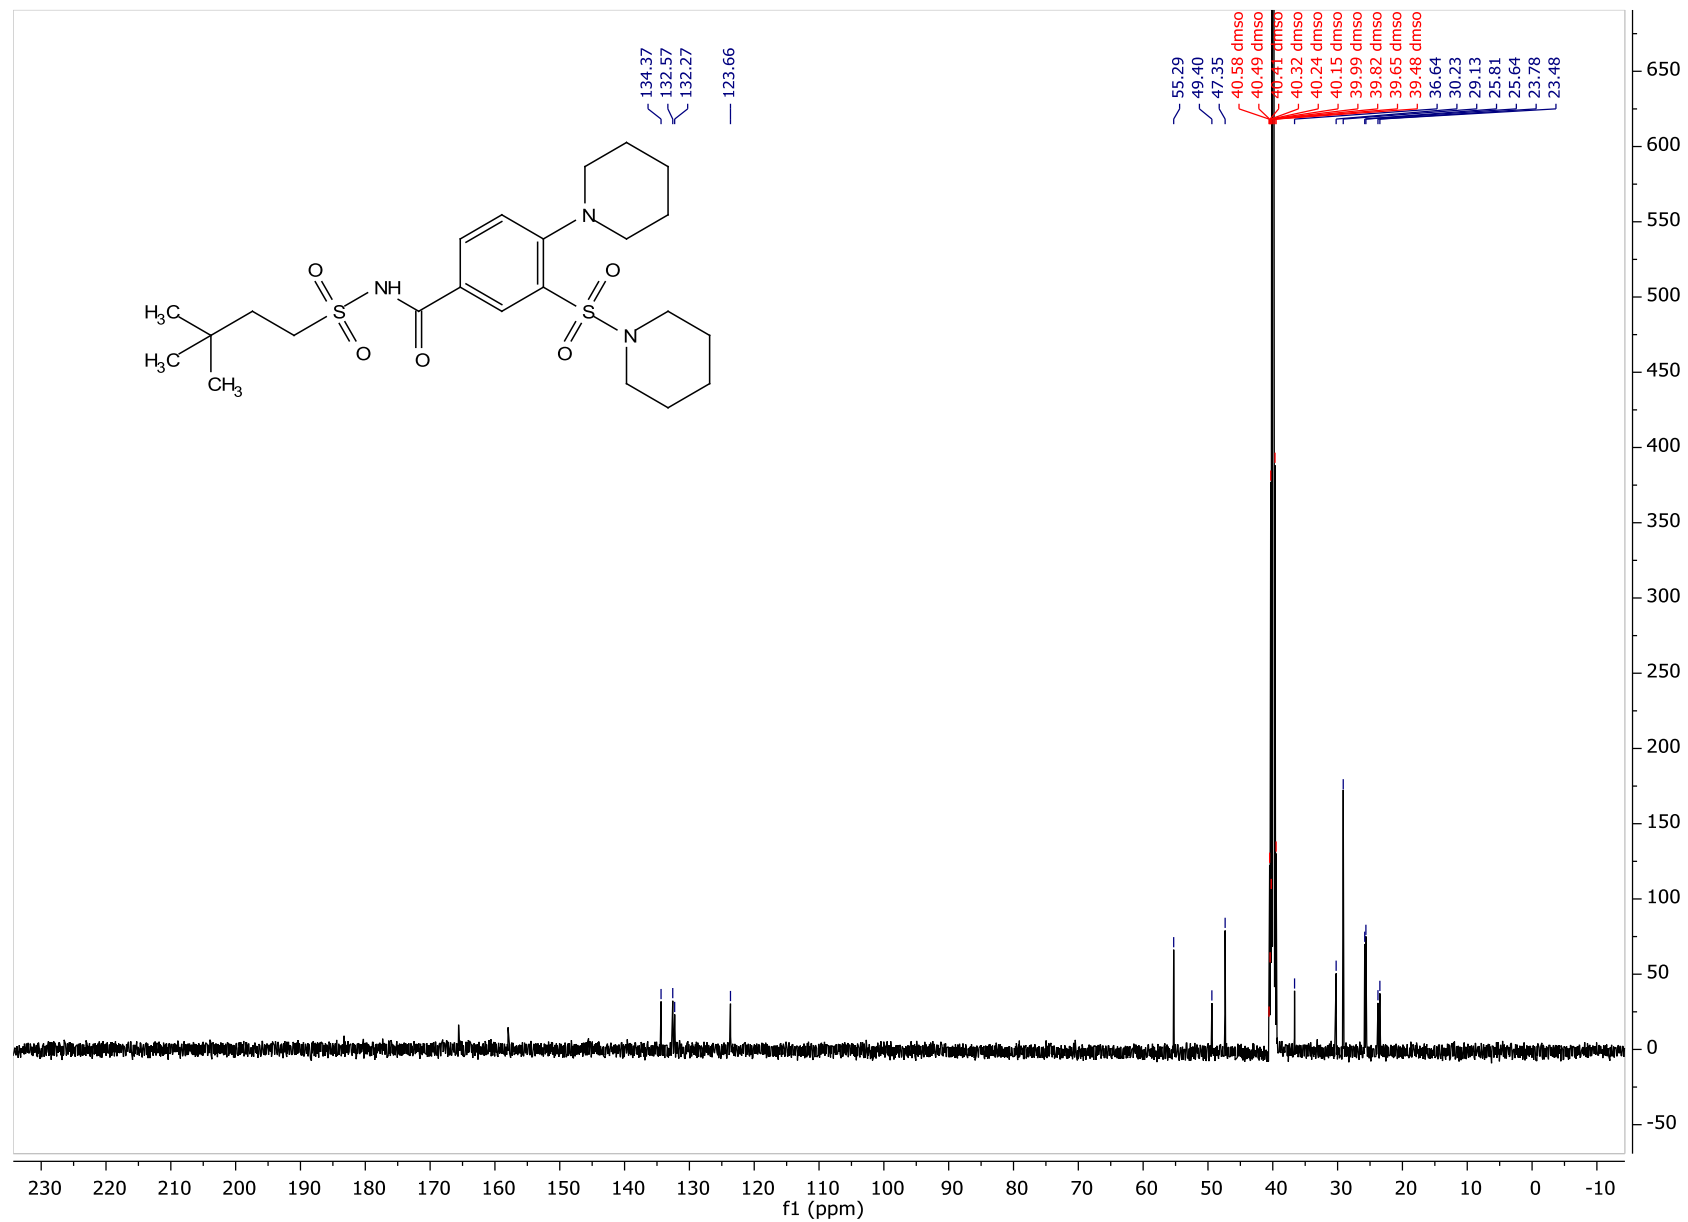



LC/MS spectrum of Z4886816226

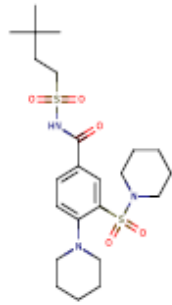

Mol Wt 499.69  
 Exact Mass 499.26

| # | Time  | Area%  |
|---|-------|--------|
| 1 | 1.567 | 100.00 |

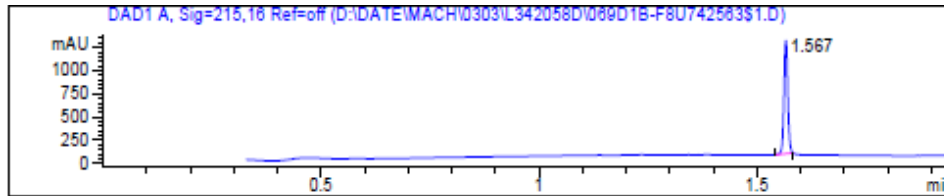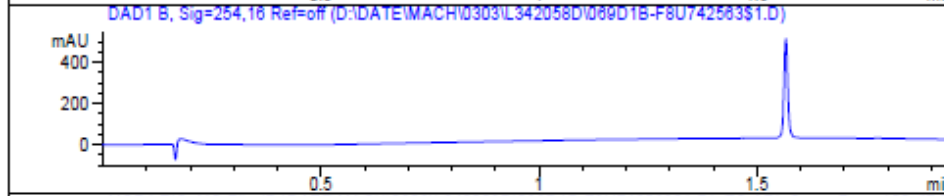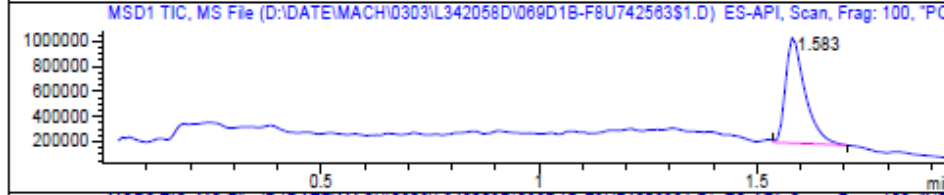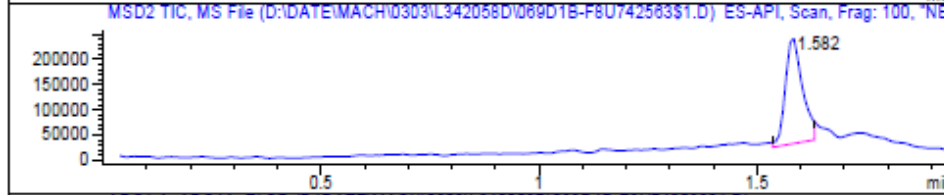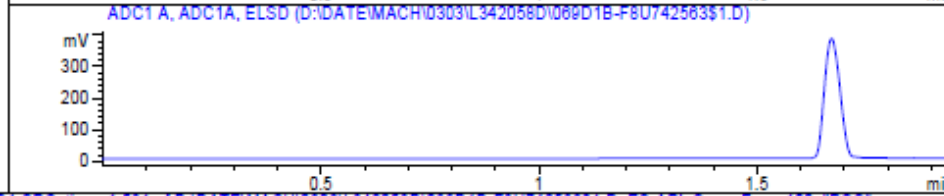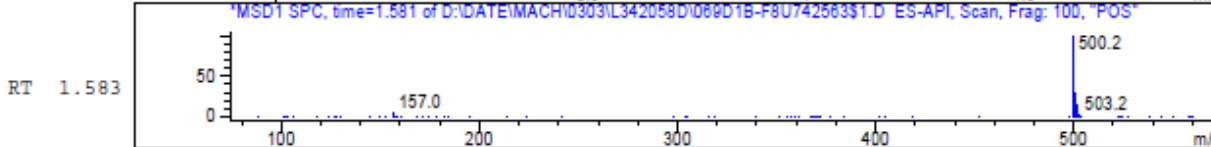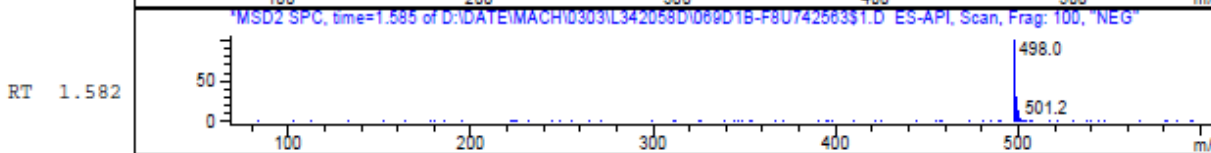

<sup>1</sup>H NMR spectrum of Z4886816234

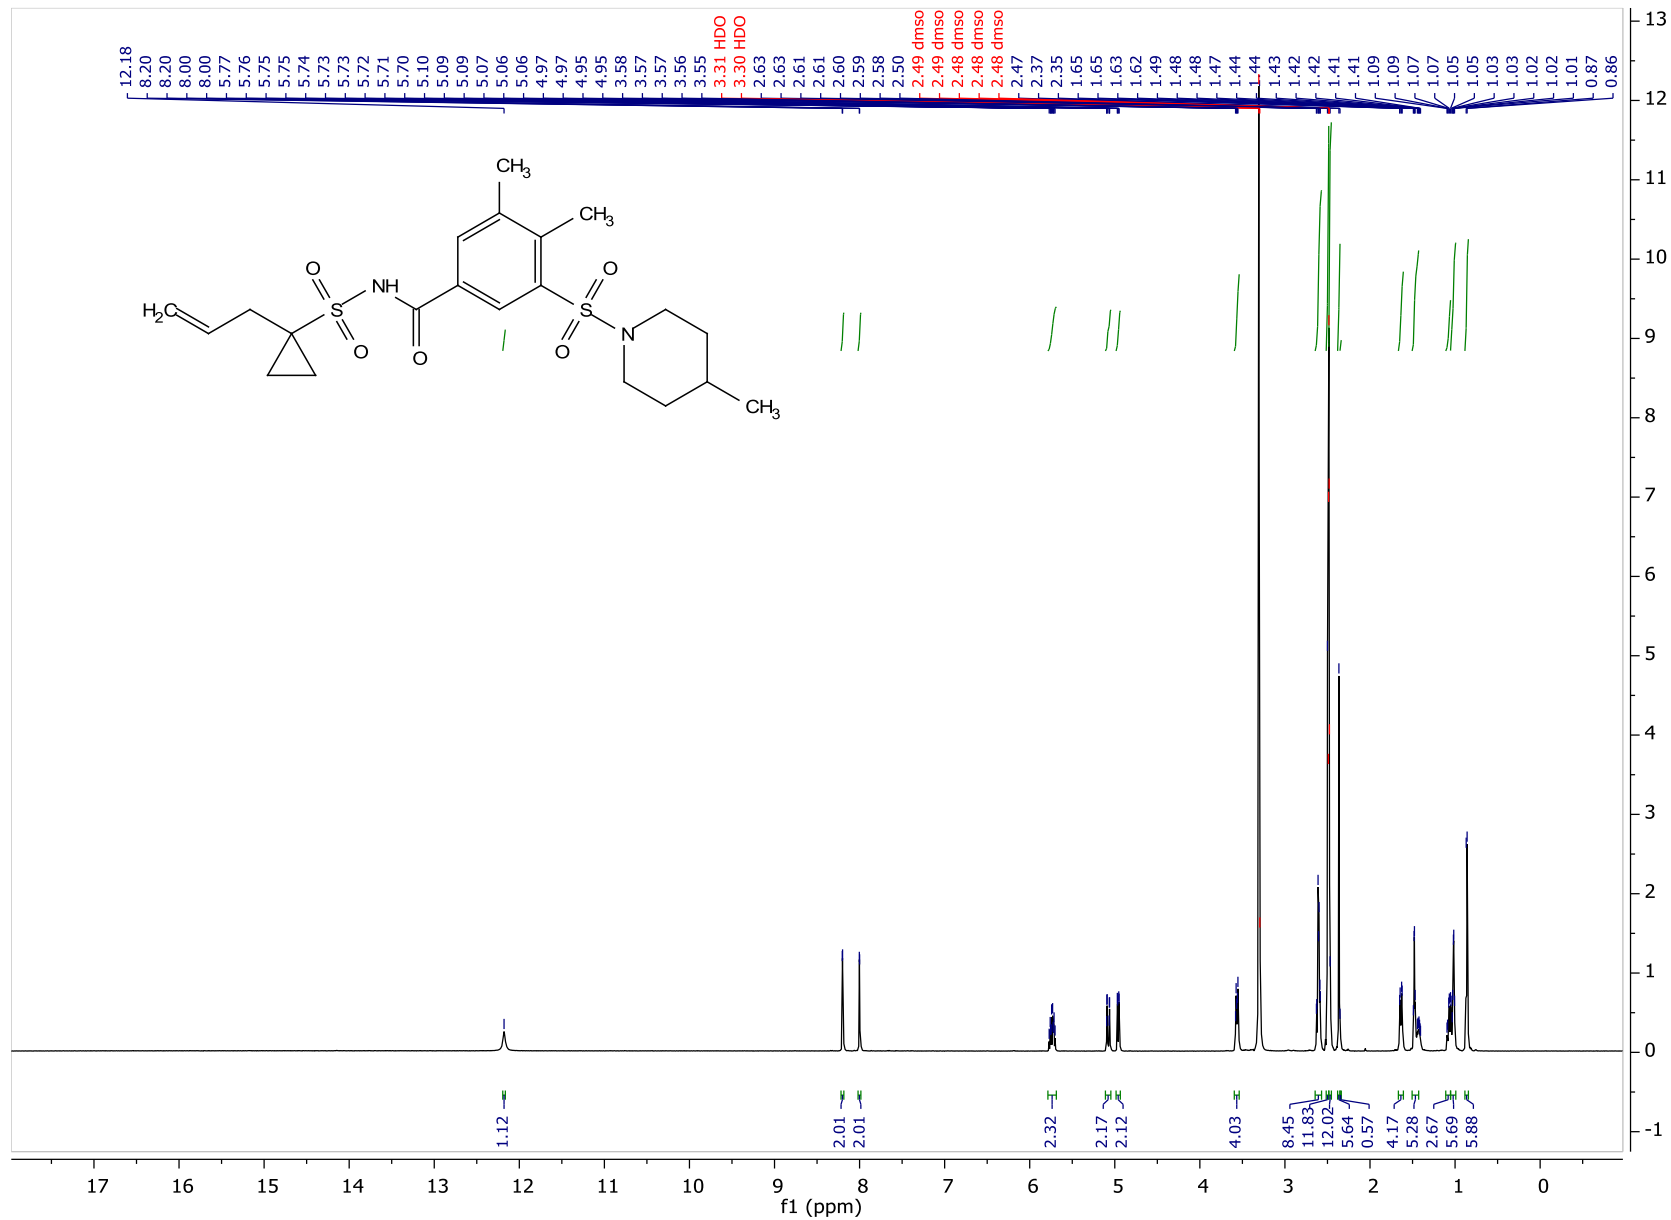

<sup>13</sup>C NMR spectrum of Z4886816234

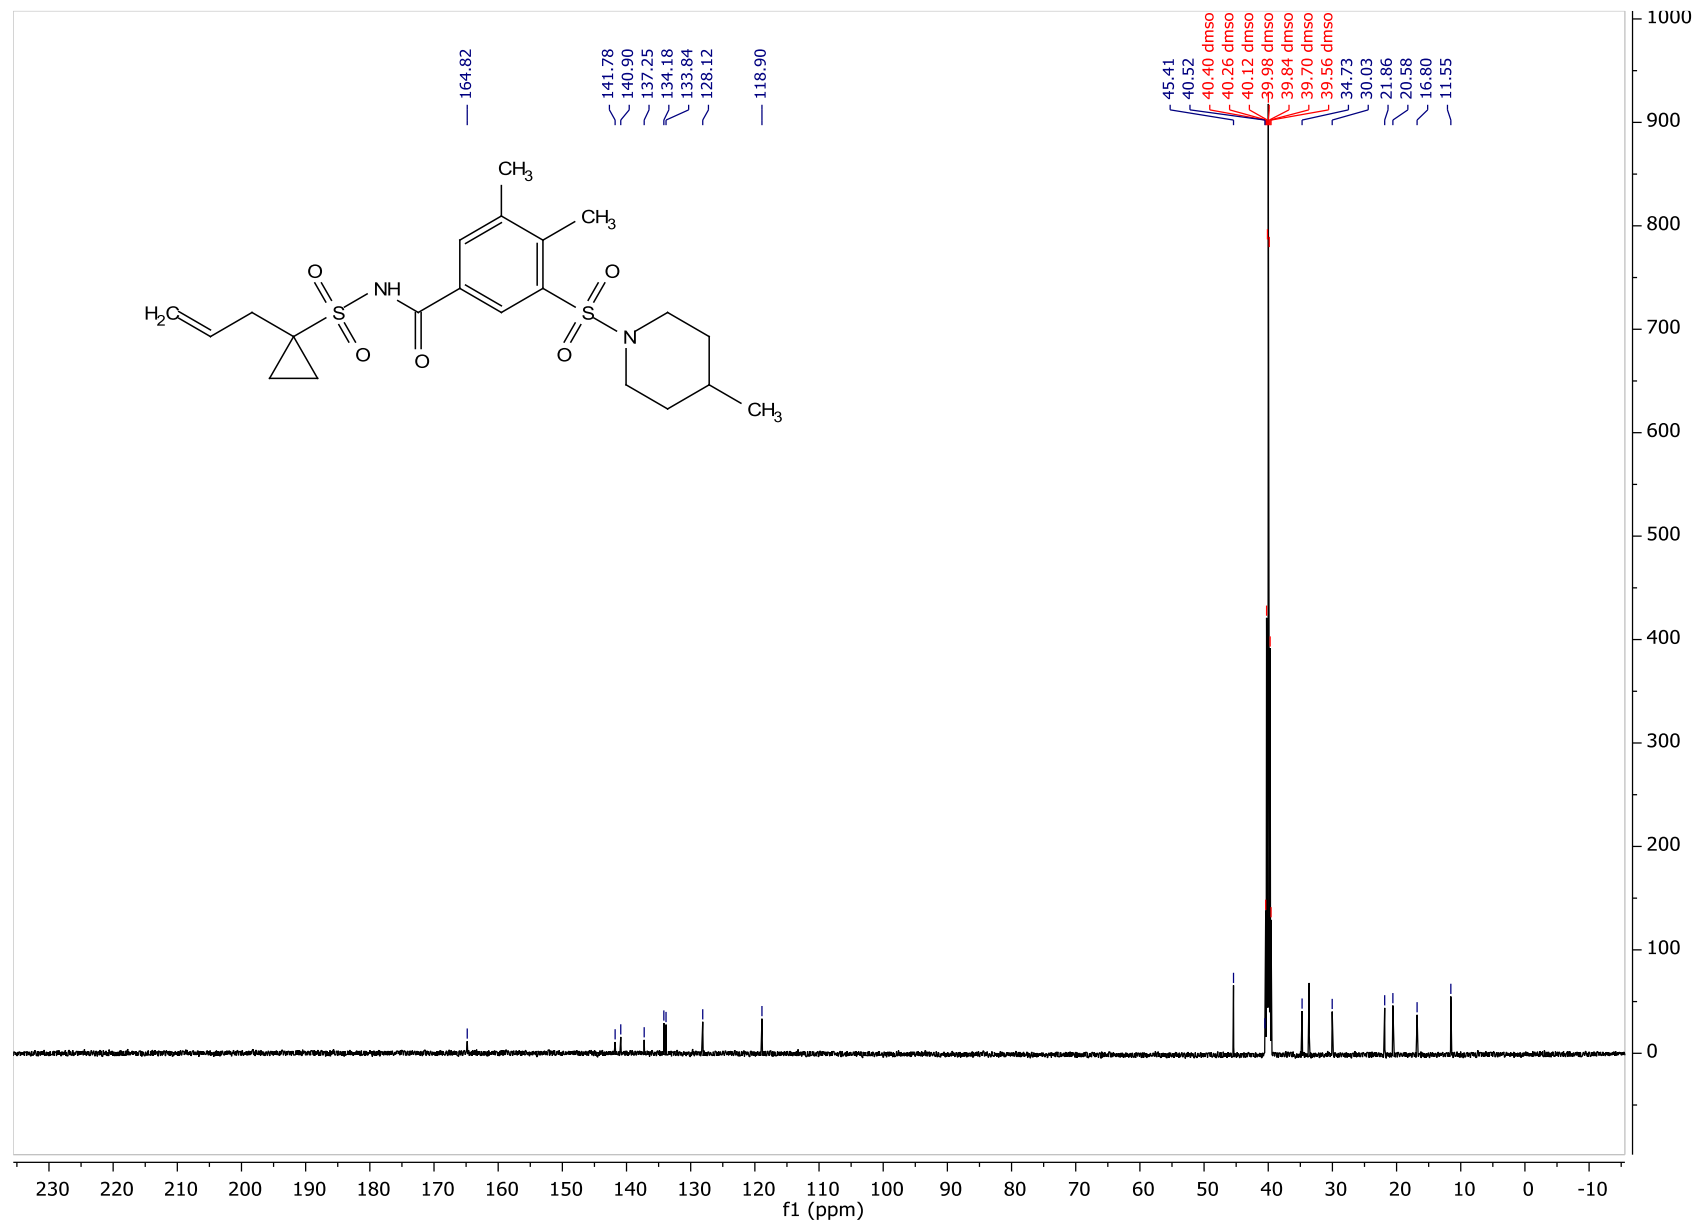

LC/MS spectrum of Z4886816234

Ret\_Time: 1.562 min

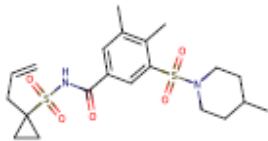

Mol Wt 454.6  
Exact Mass 454.19

| # | Time  | Area%  |
|---|-------|--------|
| 1 | 1.562 | 100.00 |

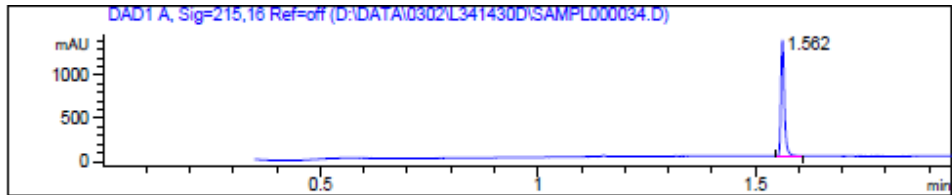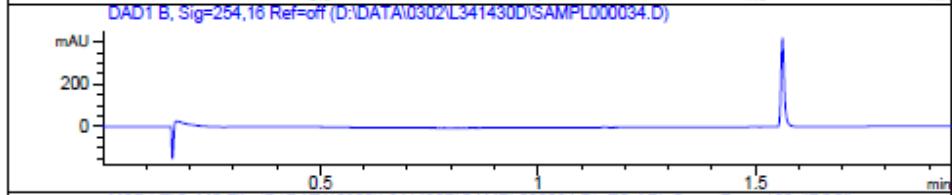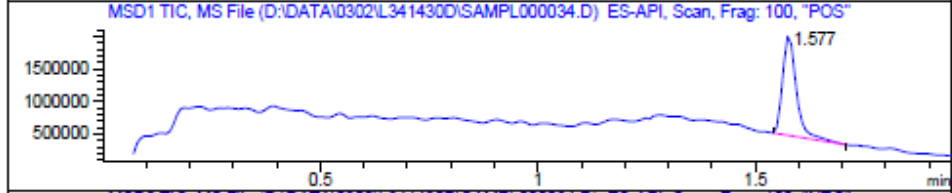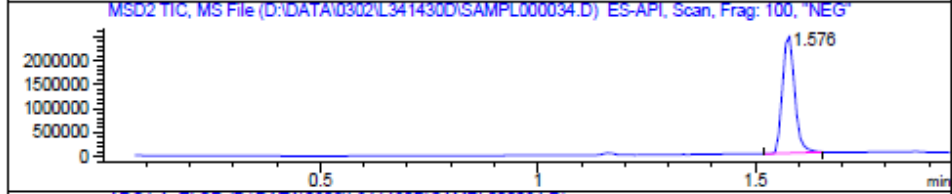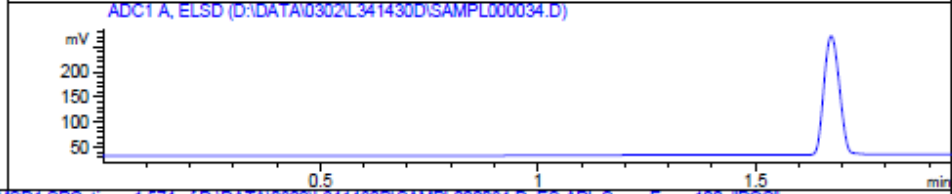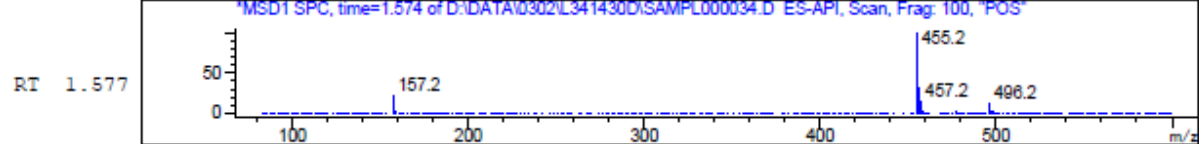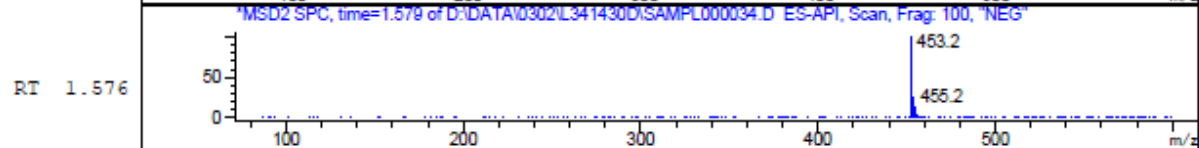

<sup>1</sup>H NMR spectrum of Z4886816241

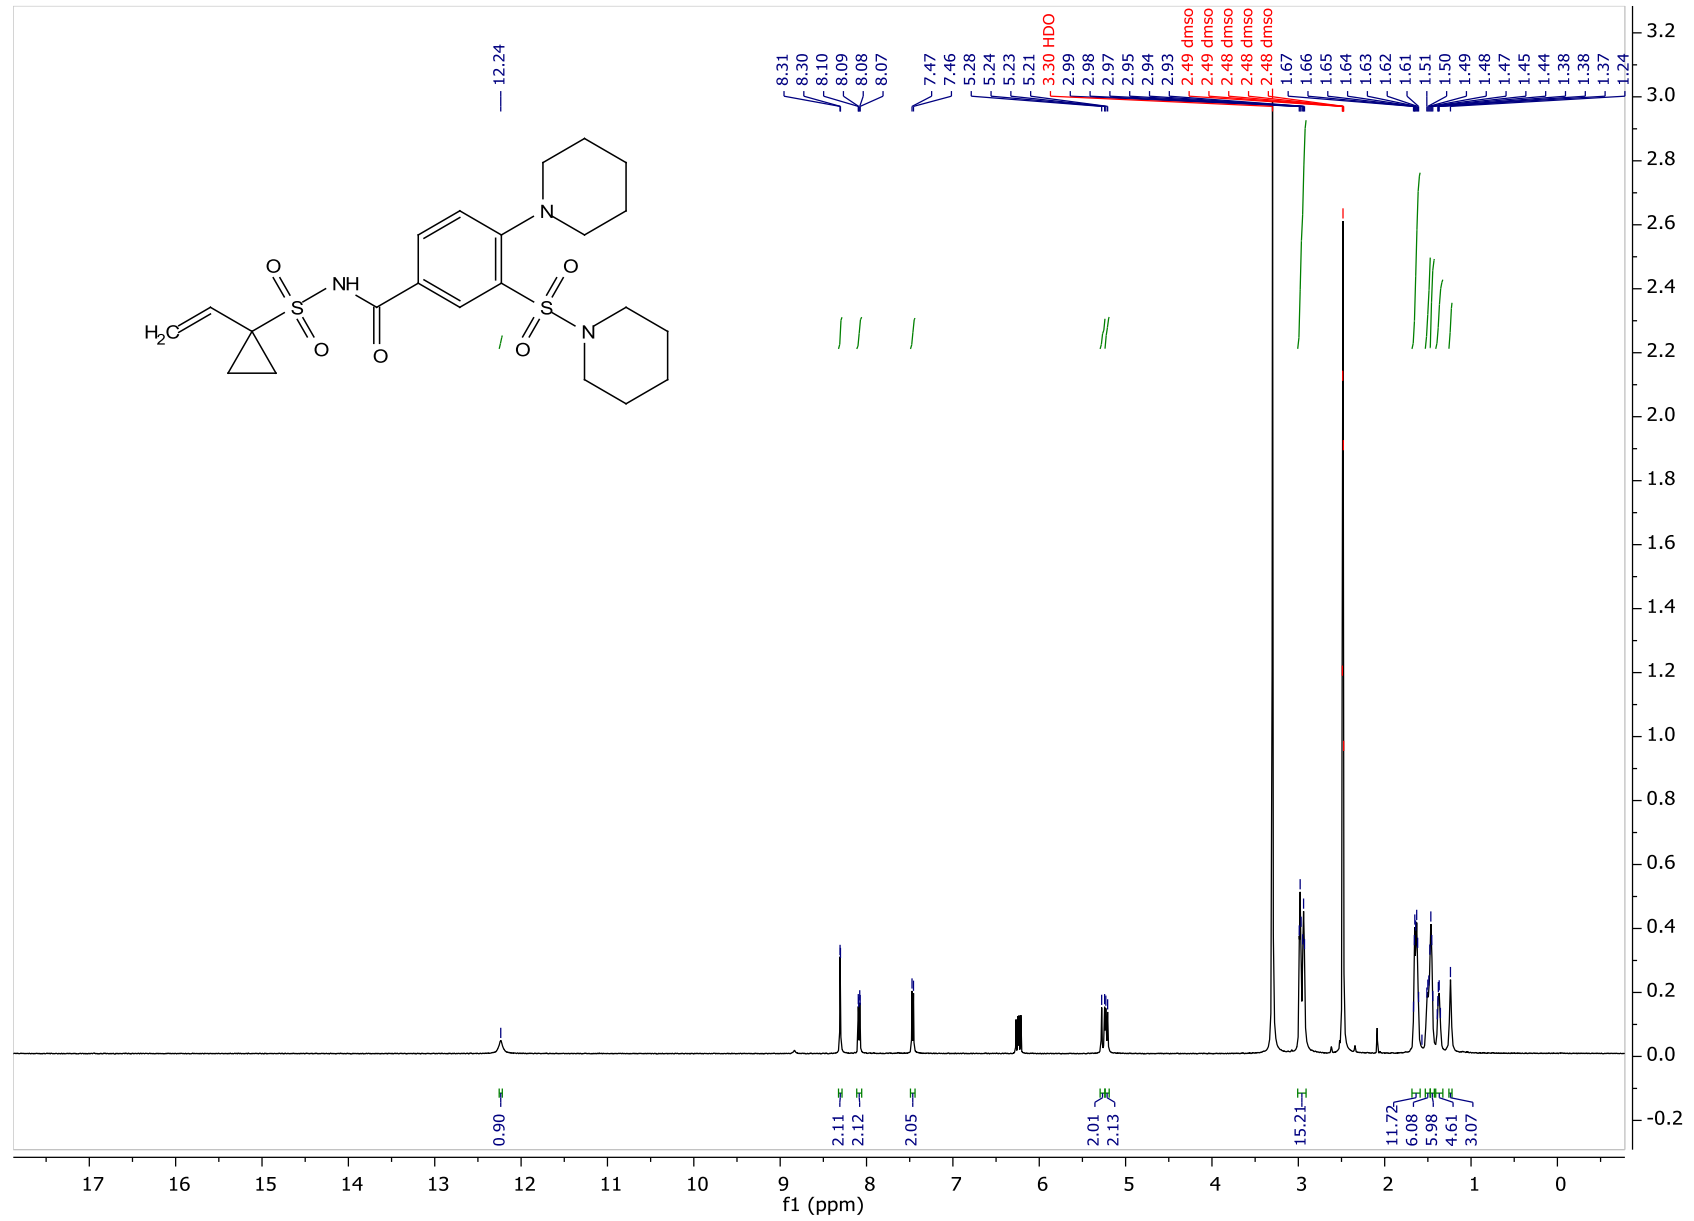

LC/MS spectrum of Z4886816241

Ret\_Time: 1.590 min

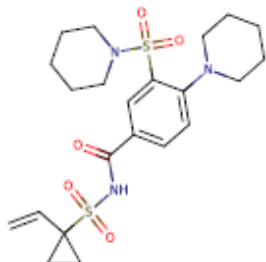

Mol Wt 481.63  
Exact Mass 481.2

| # | Time  | Area%  |
|---|-------|--------|
| 1 | 1.590 | 100.00 |

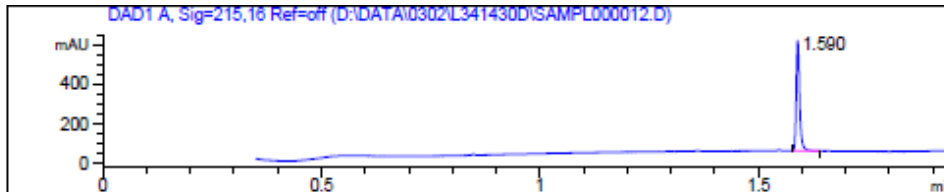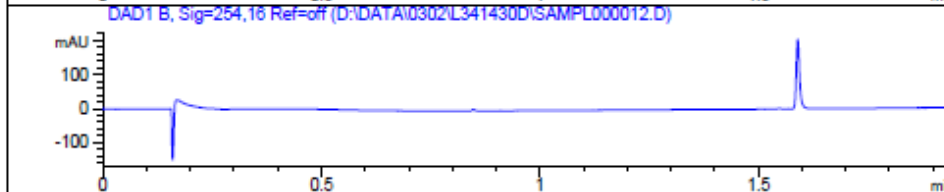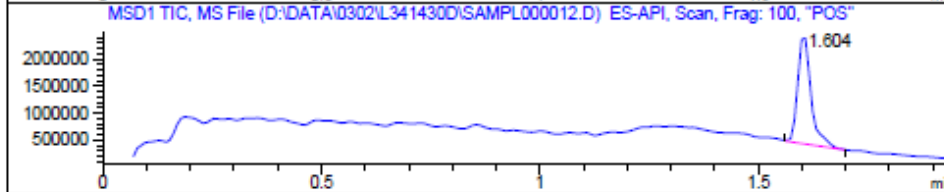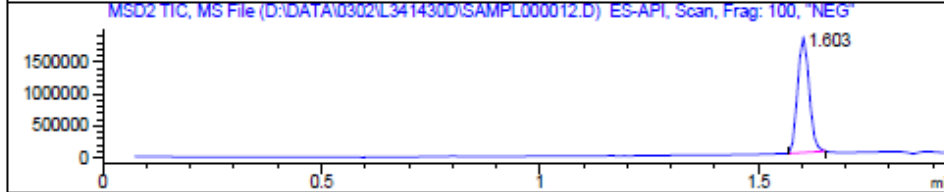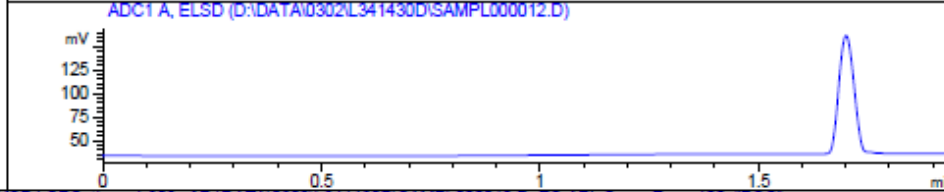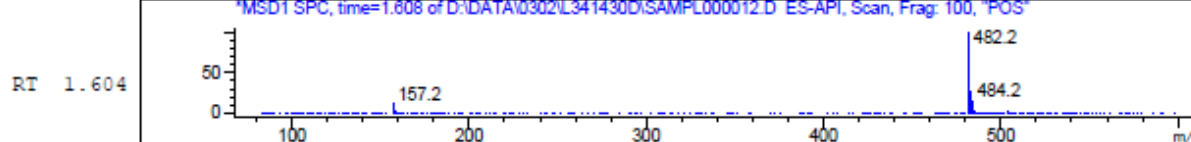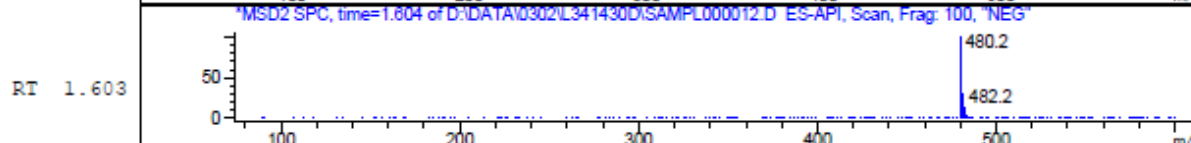

<sup>1</sup>H NMR spectrum of Z4886816252

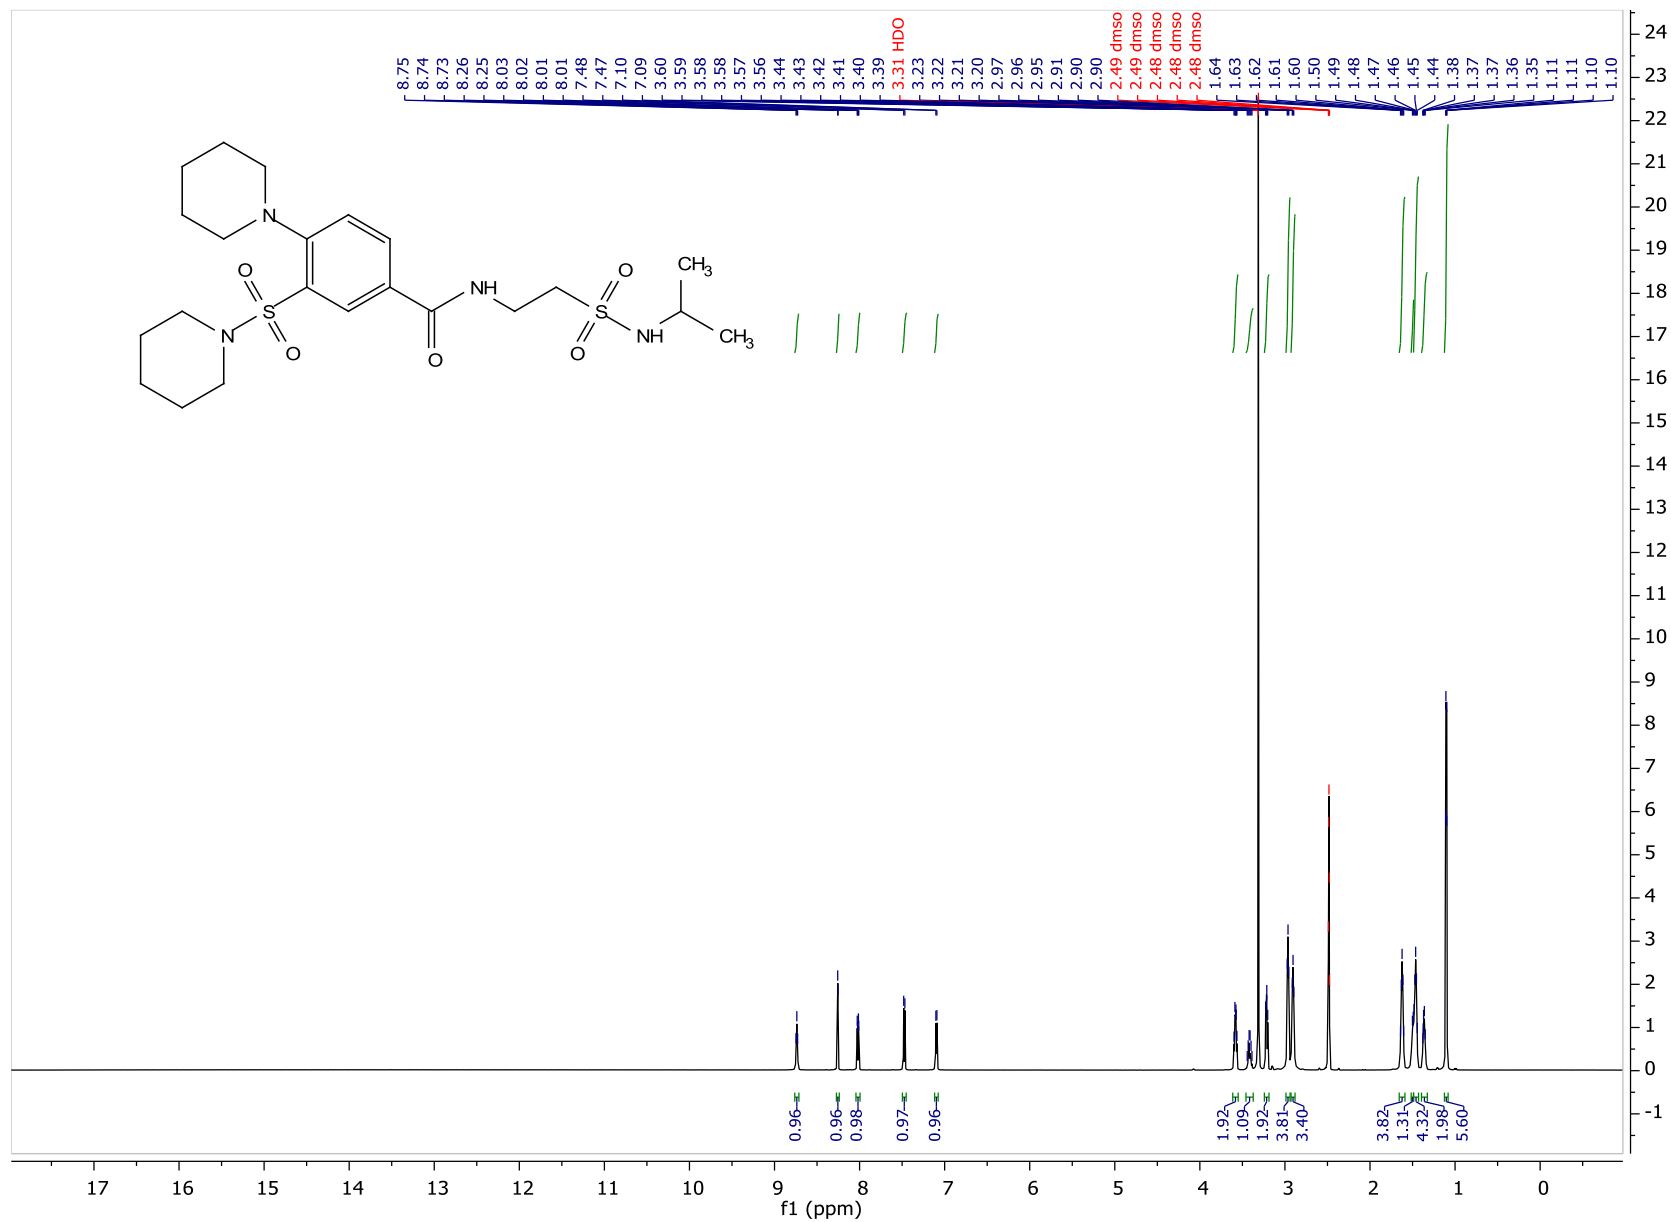

<sup>13</sup>C NMR spectrum of Z4886816252

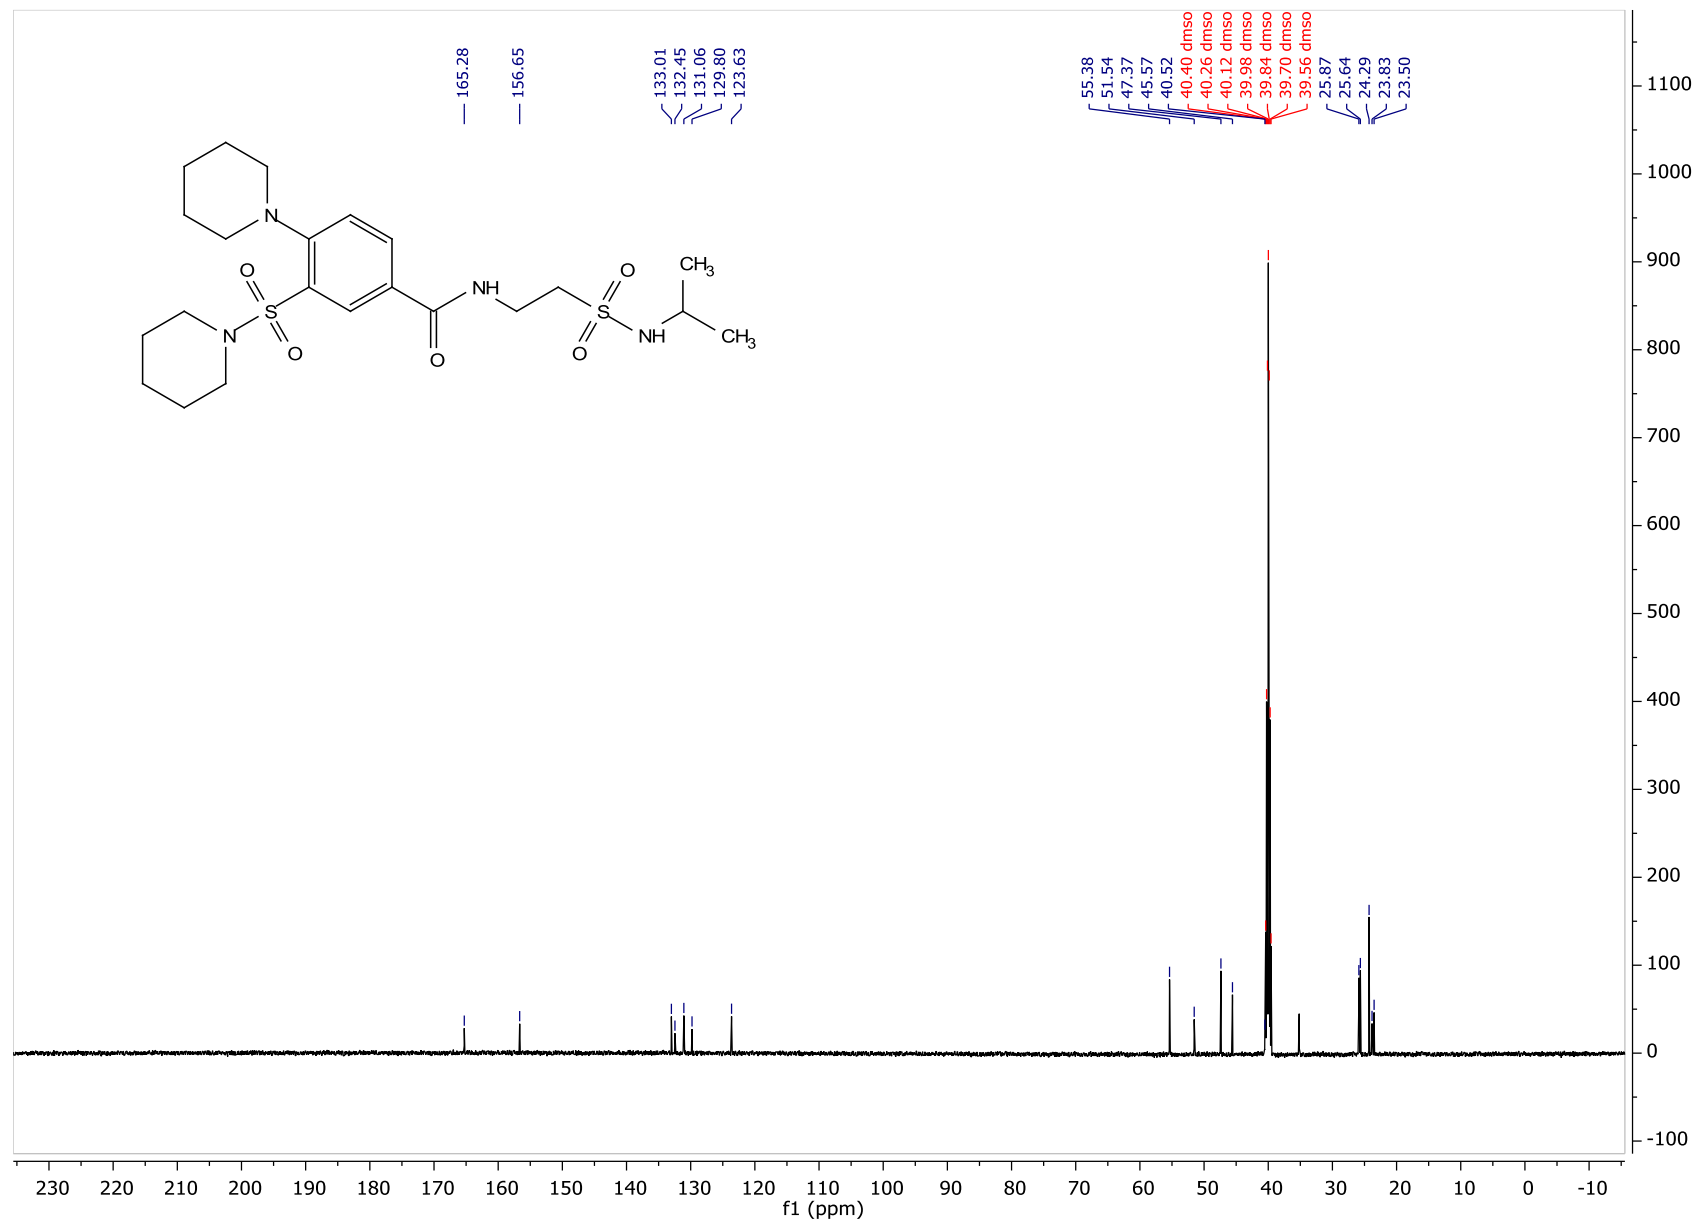



LC/MS spectrum of Z4886816252

Ret\_Time: 1.446 min

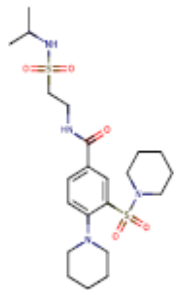

Mol Wt 500.68

Exact Mass 500.25

| # | Time  | Area%  |
|---|-------|--------|
| 1 | 1.446 | 100.00 |

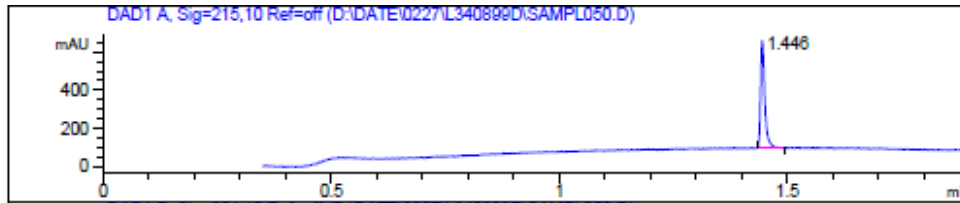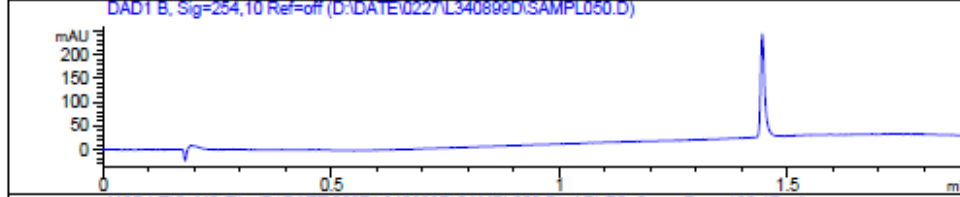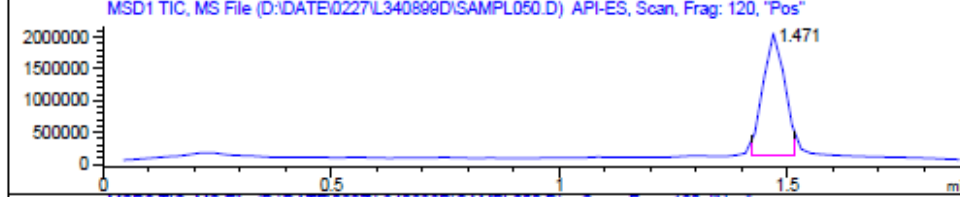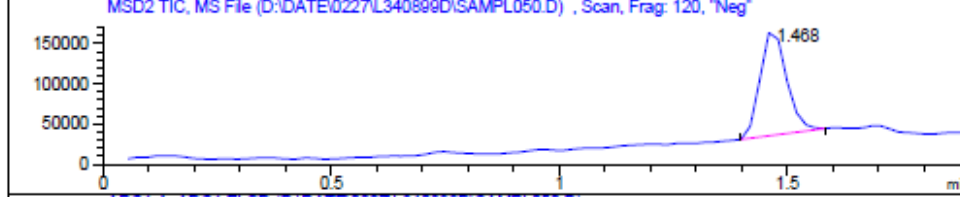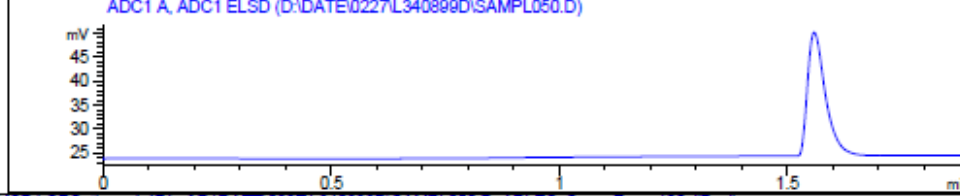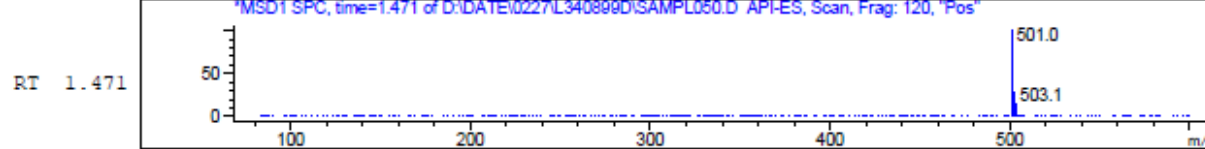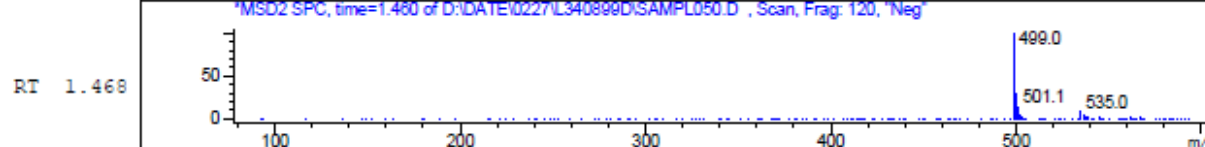

<sup>1</sup>H NMR spectrum of Z4886816294

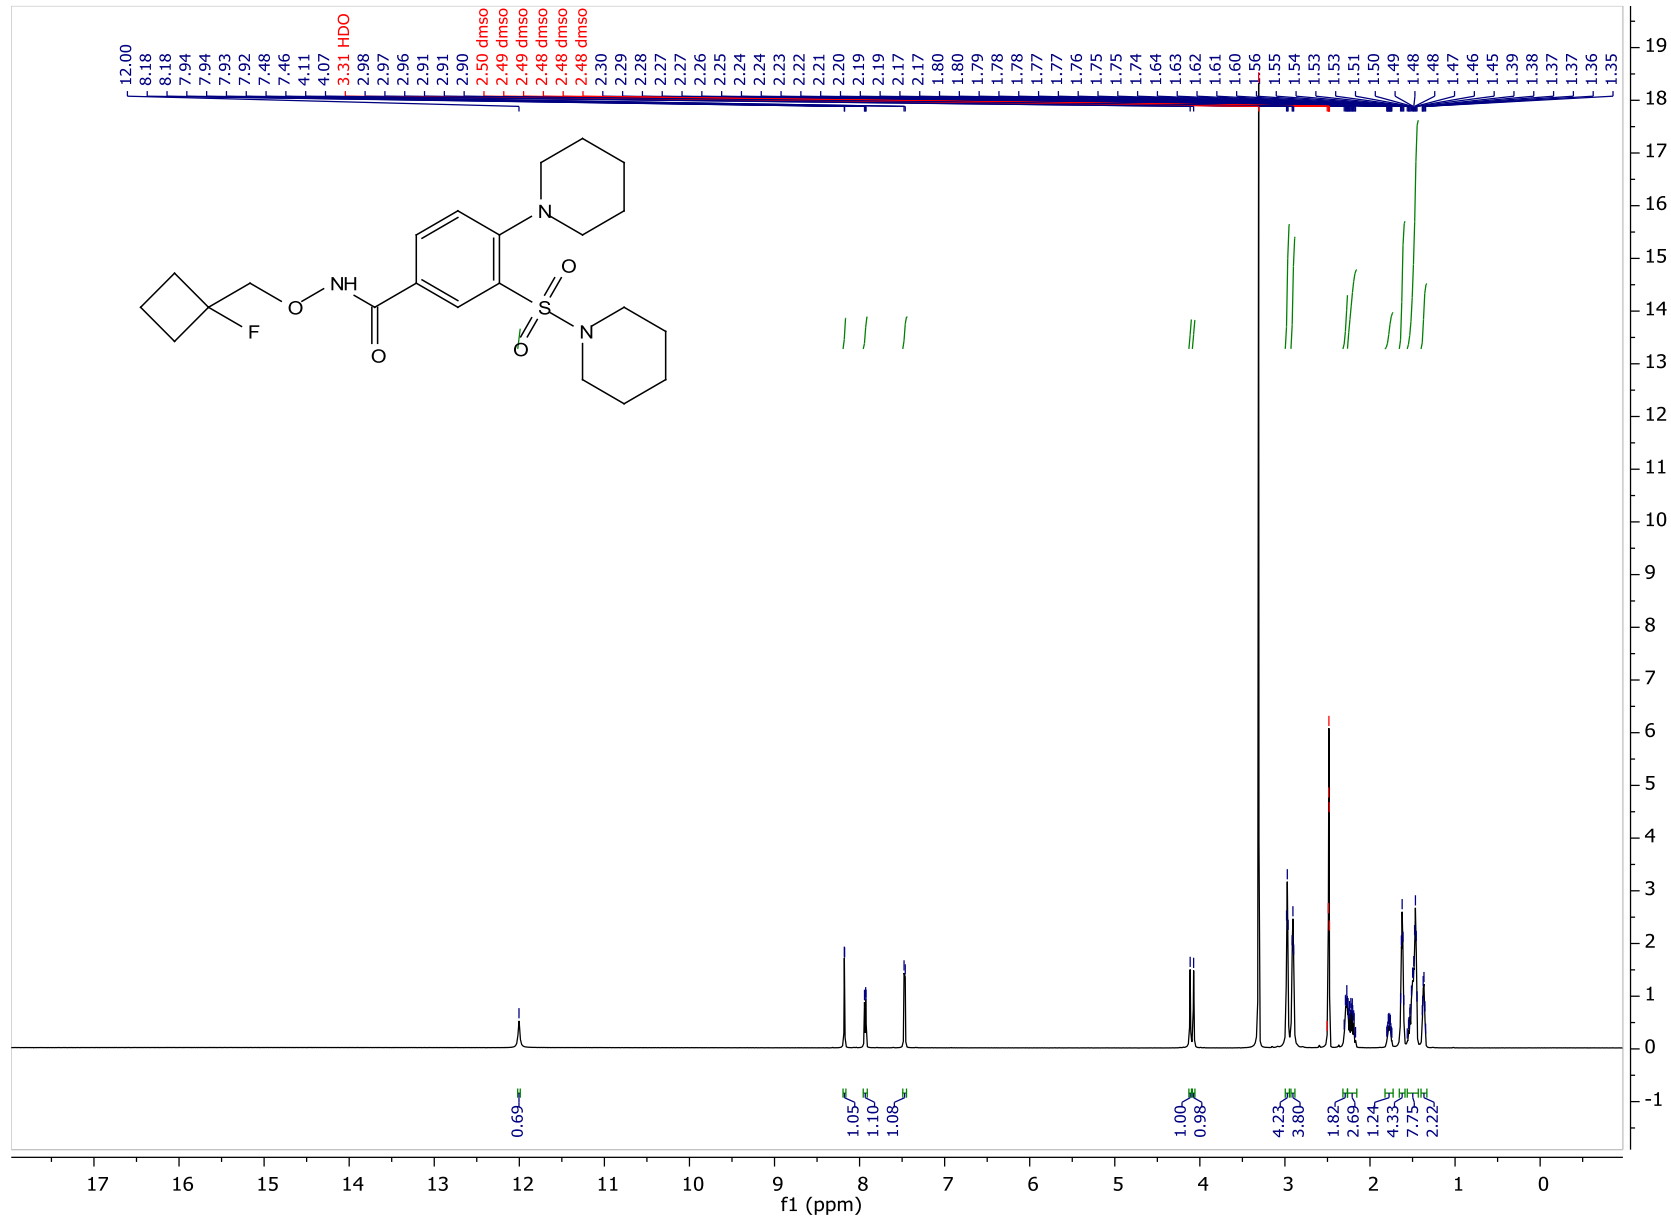

<sup>13</sup>C NMR spectrum of Z4886816294

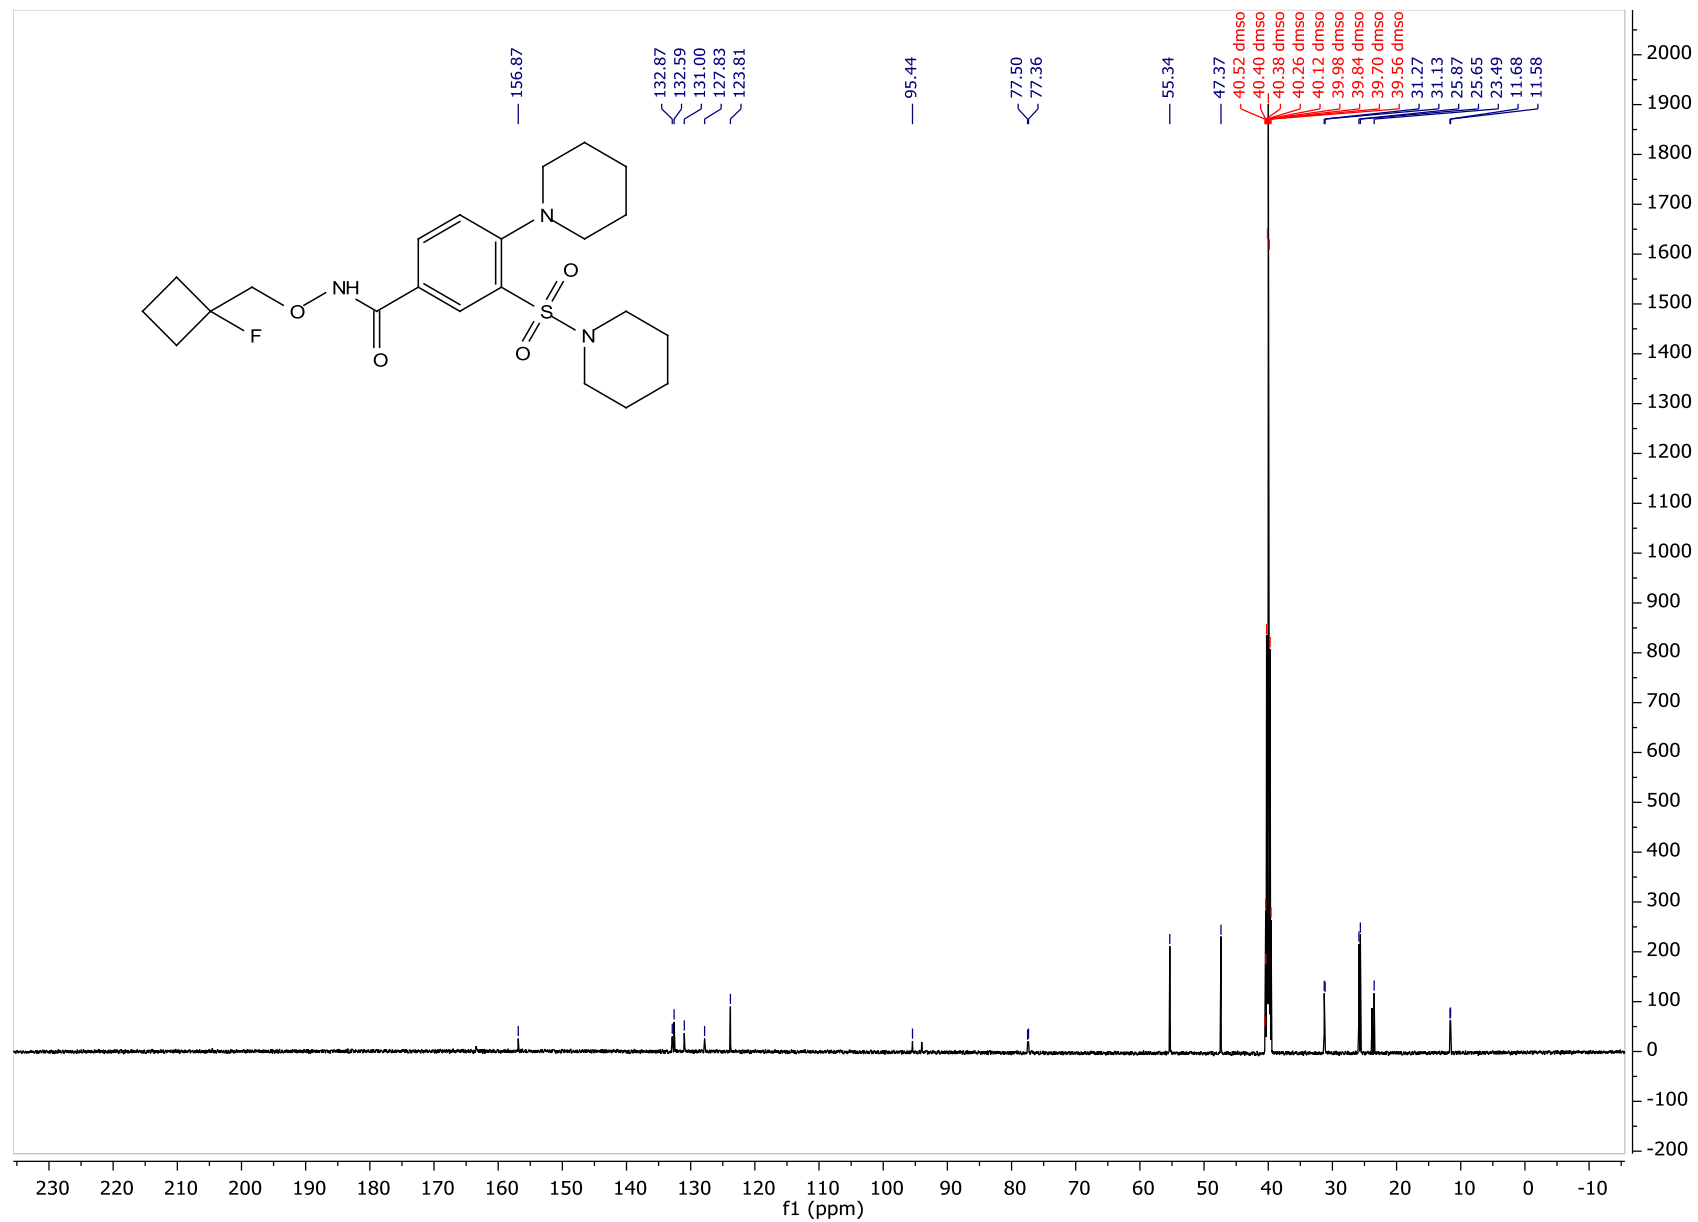

LC/MS spectrum of Z4886816294

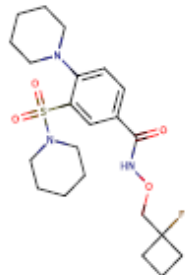

Mol Wt 453.57  
 Exact Mass 453.25  
 # Time Area%

| # | Time  | Area%  |
|---|-------|--------|
| 1 | 1.546 | 100.00 |

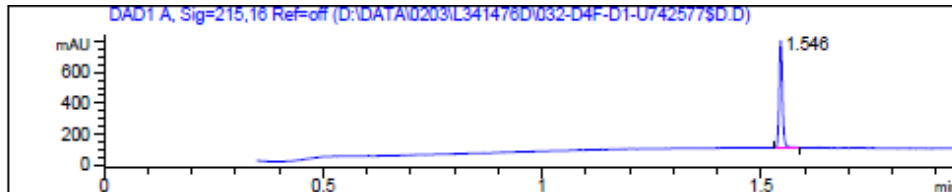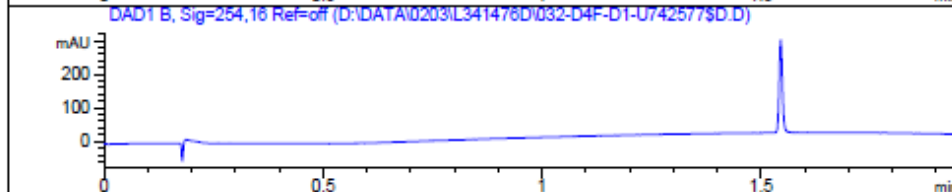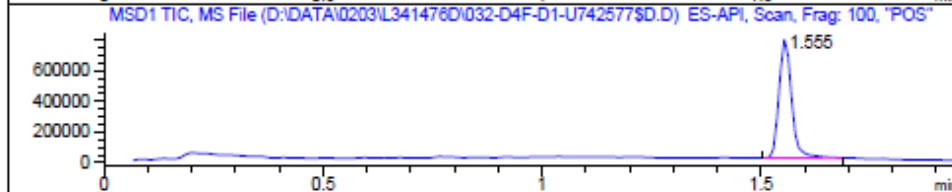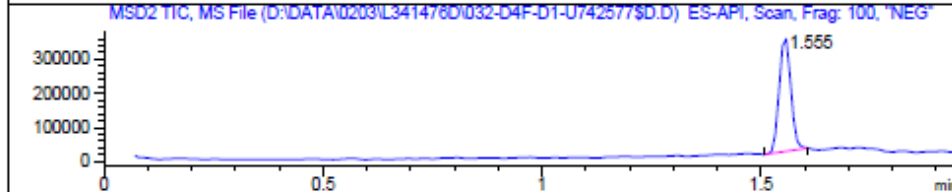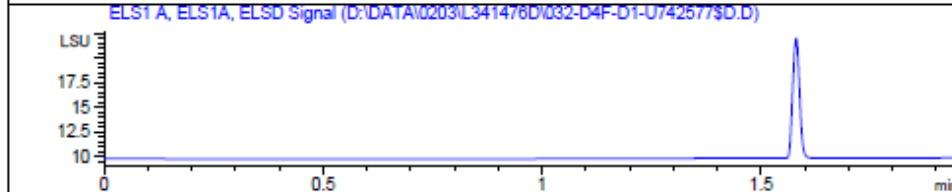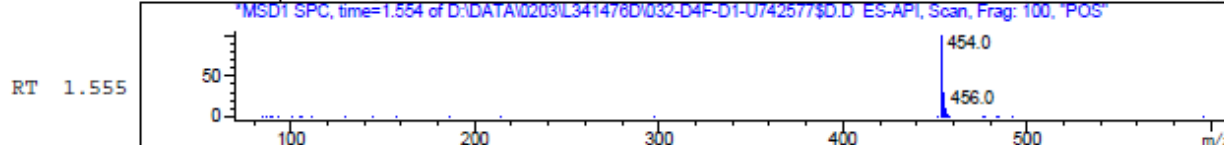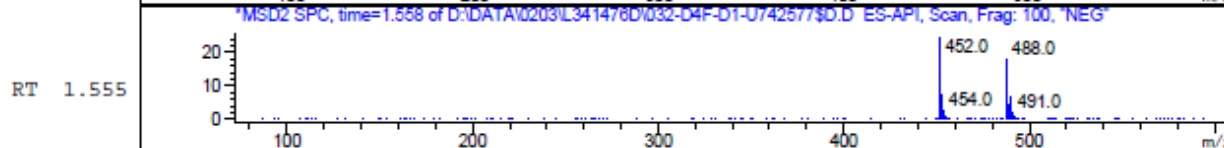

<sup>1</sup>H NMR spectrum of Z4886816301

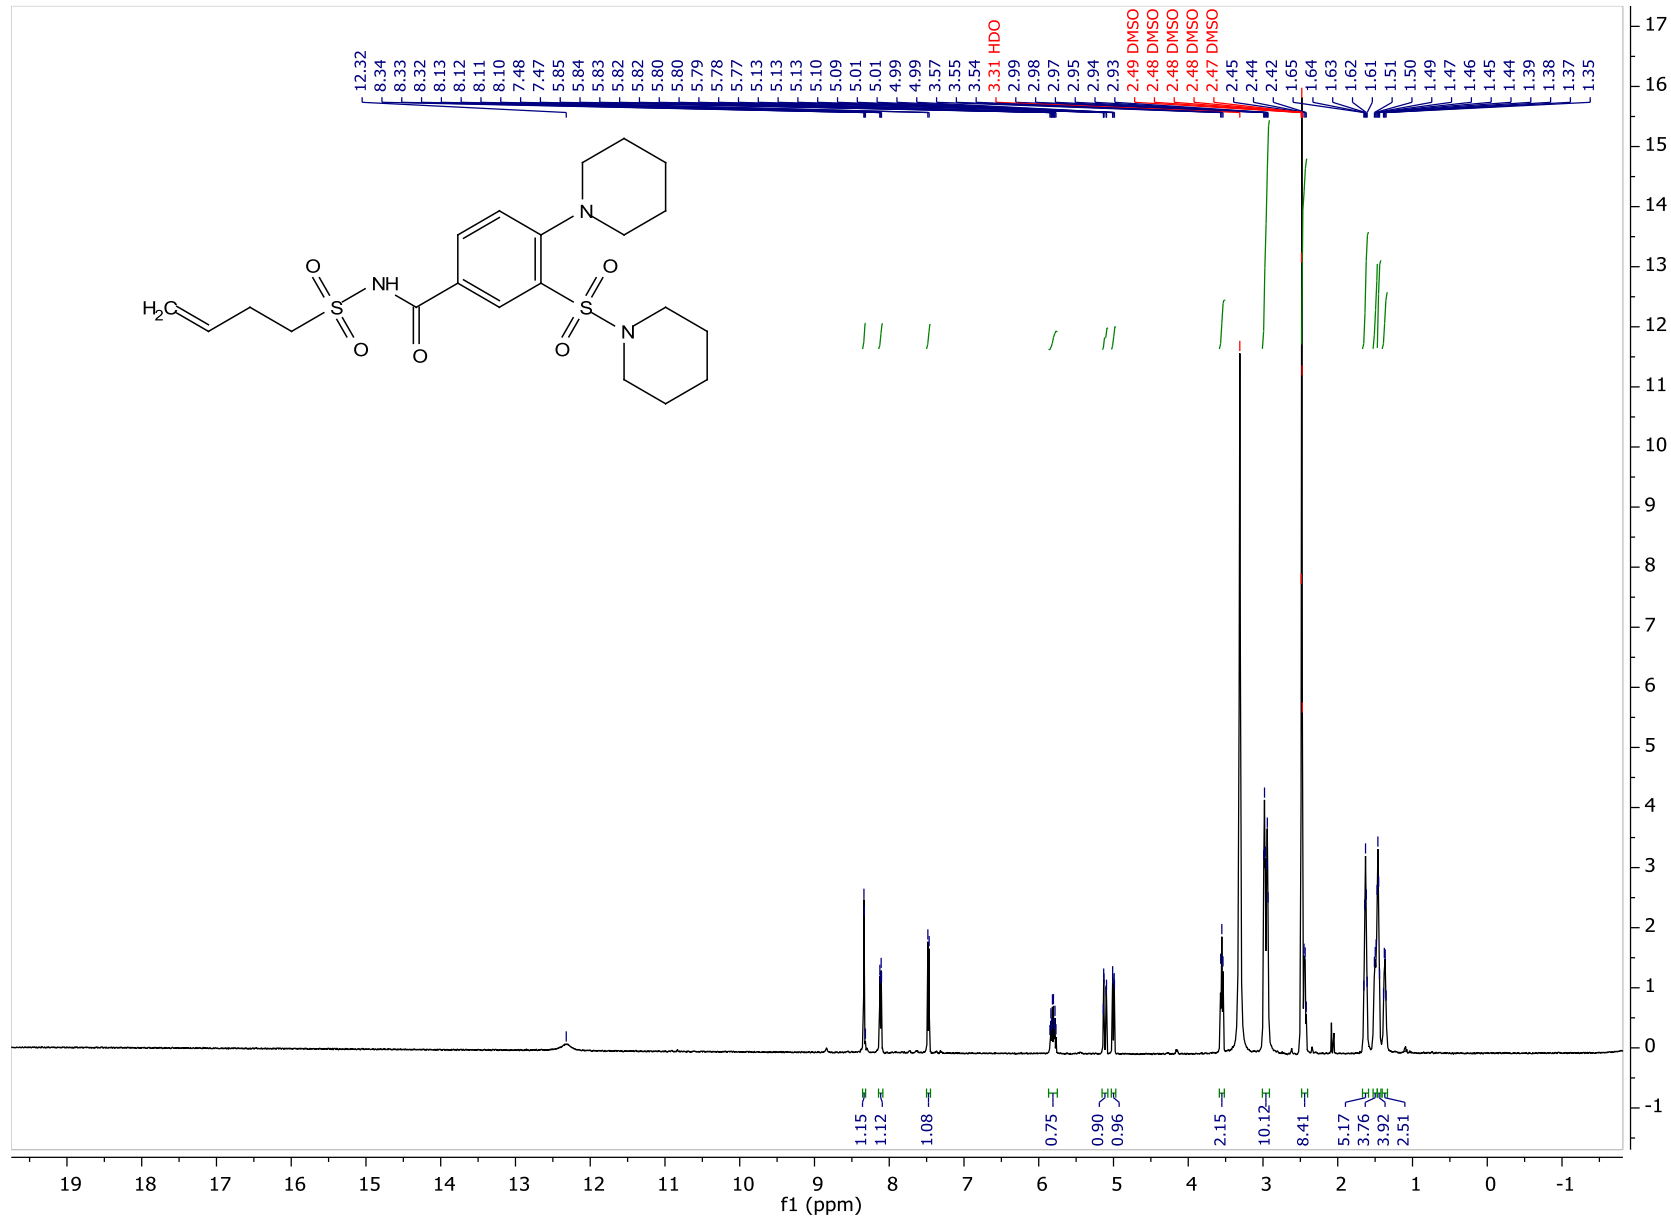

<sup>13</sup>C NMR spectrum of Z4886816301

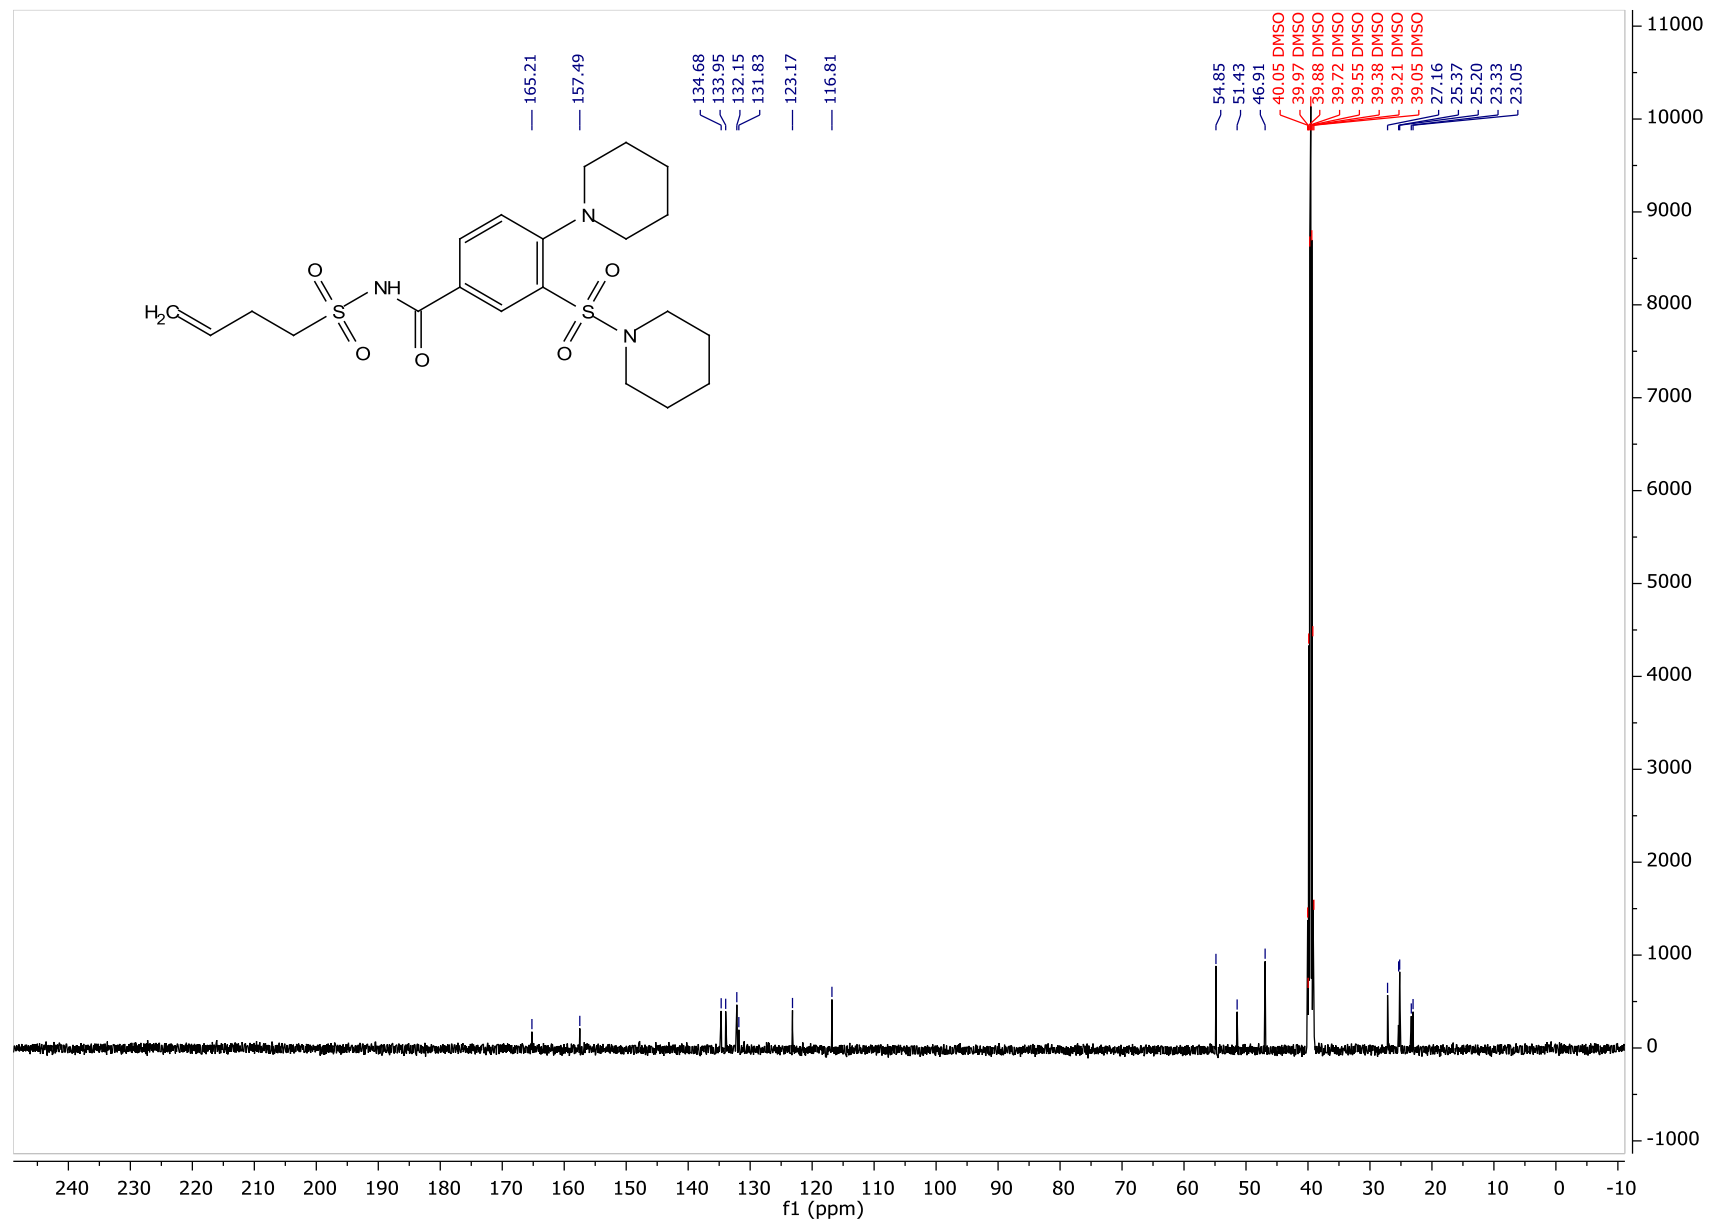

LC/MS spectrum of Z4886816301

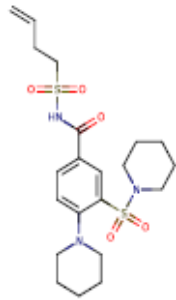

Mol Wt 469.62  
Exact Mass 469.2

| # | Time  | Area%  |
|---|-------|--------|
| 1 | 1.511 | 100.00 |

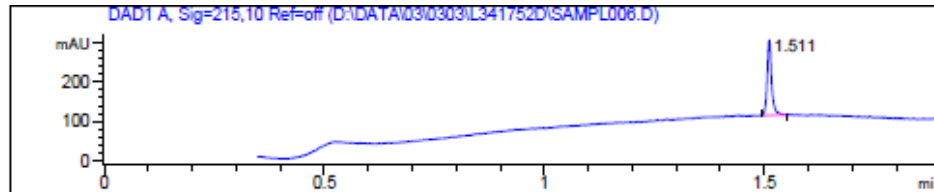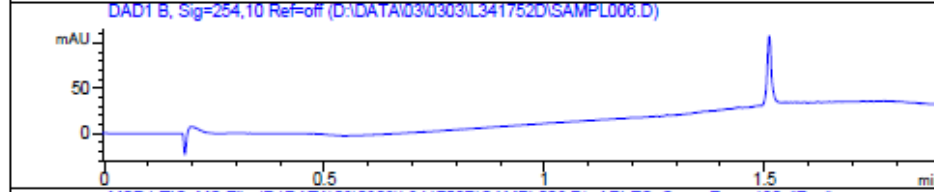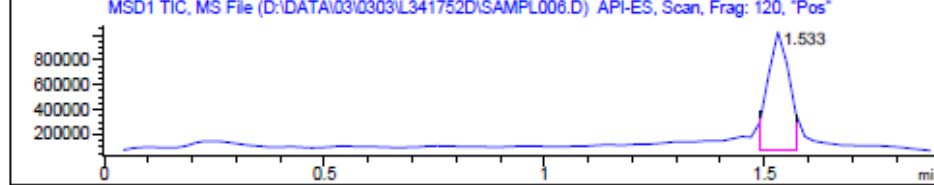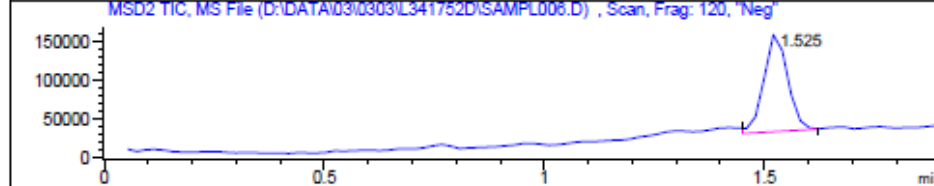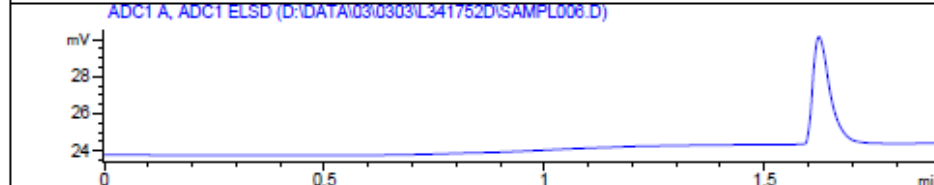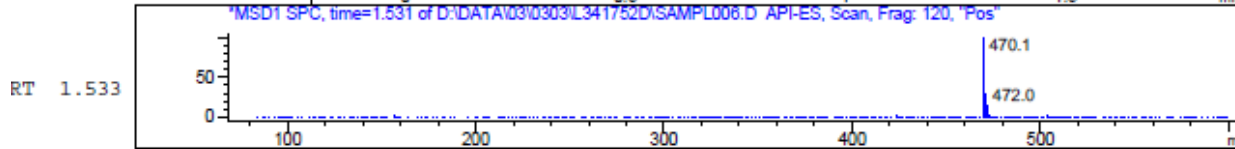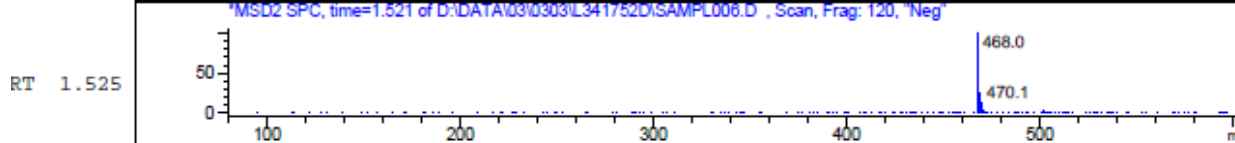

<sup>1</sup>H NMR spectrum of Z4886816304

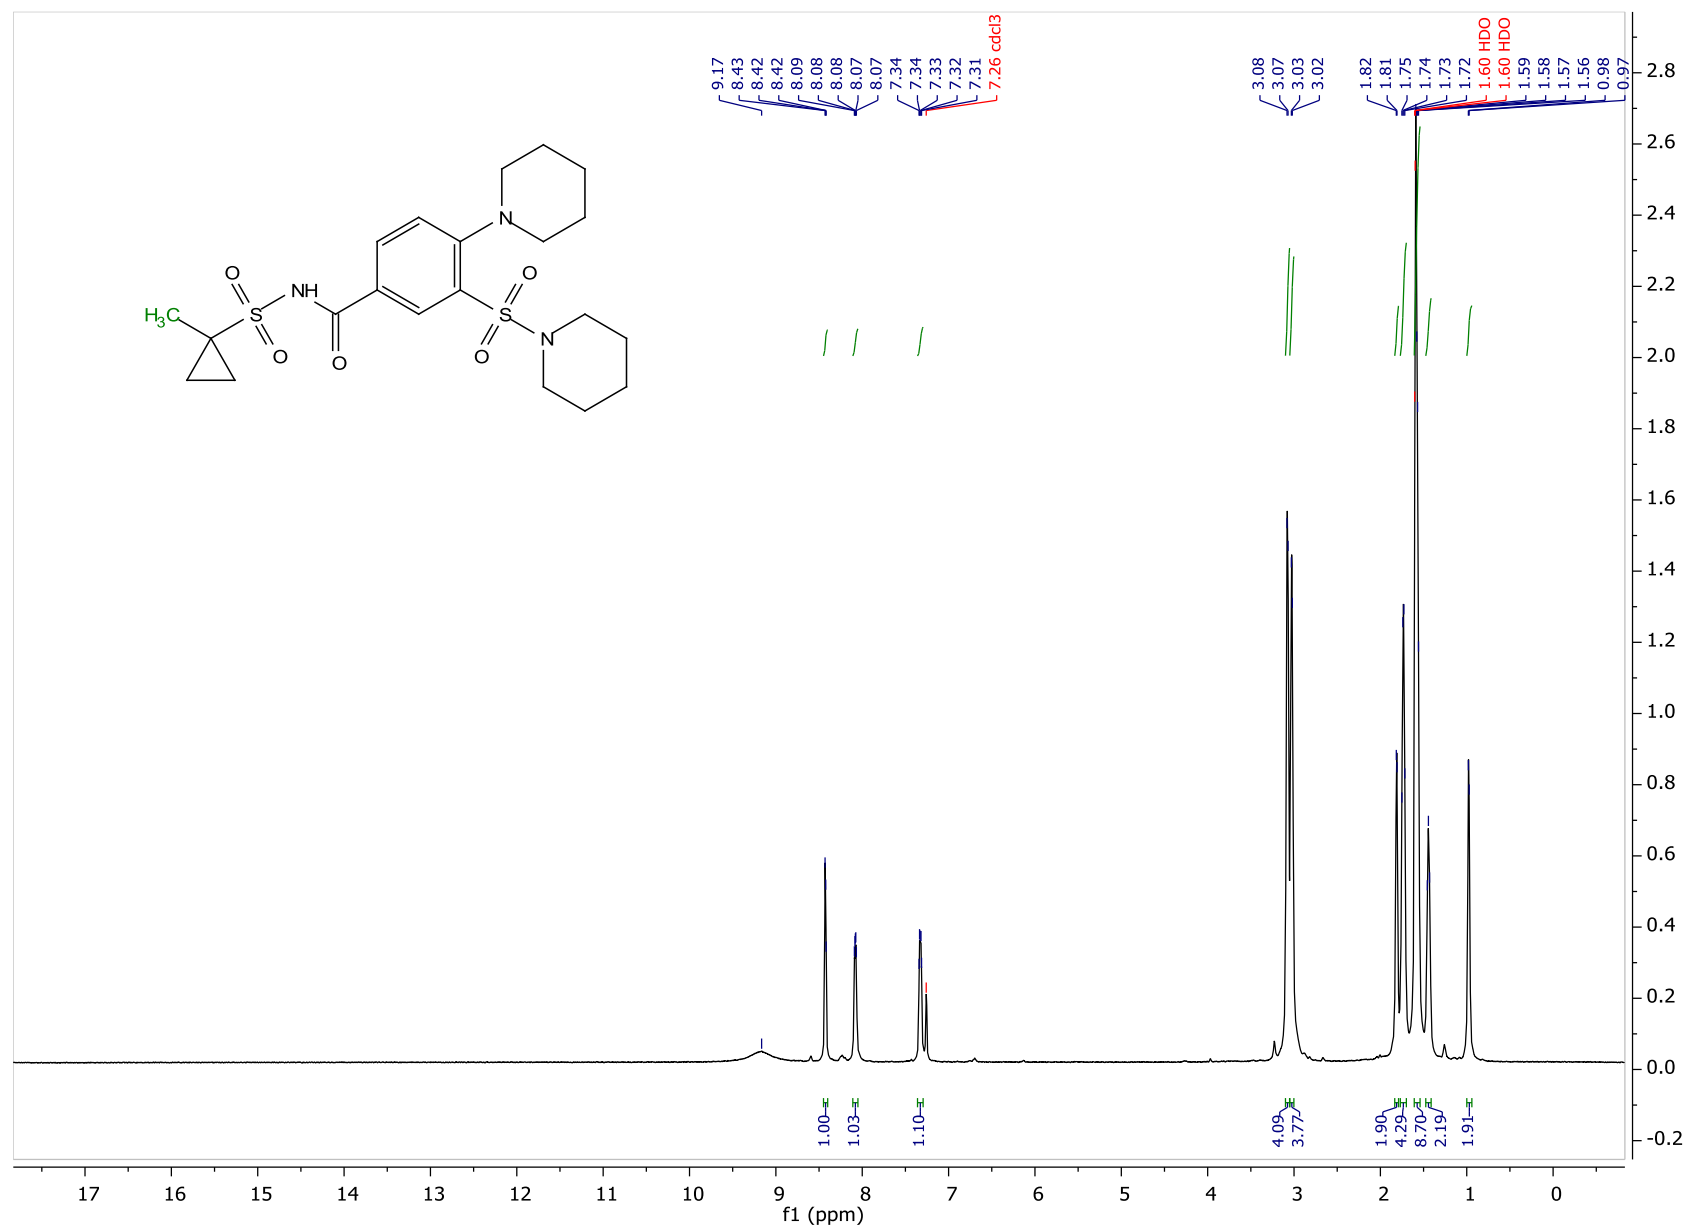



<sup>13</sup>C NMR spectrum of Z4886816304

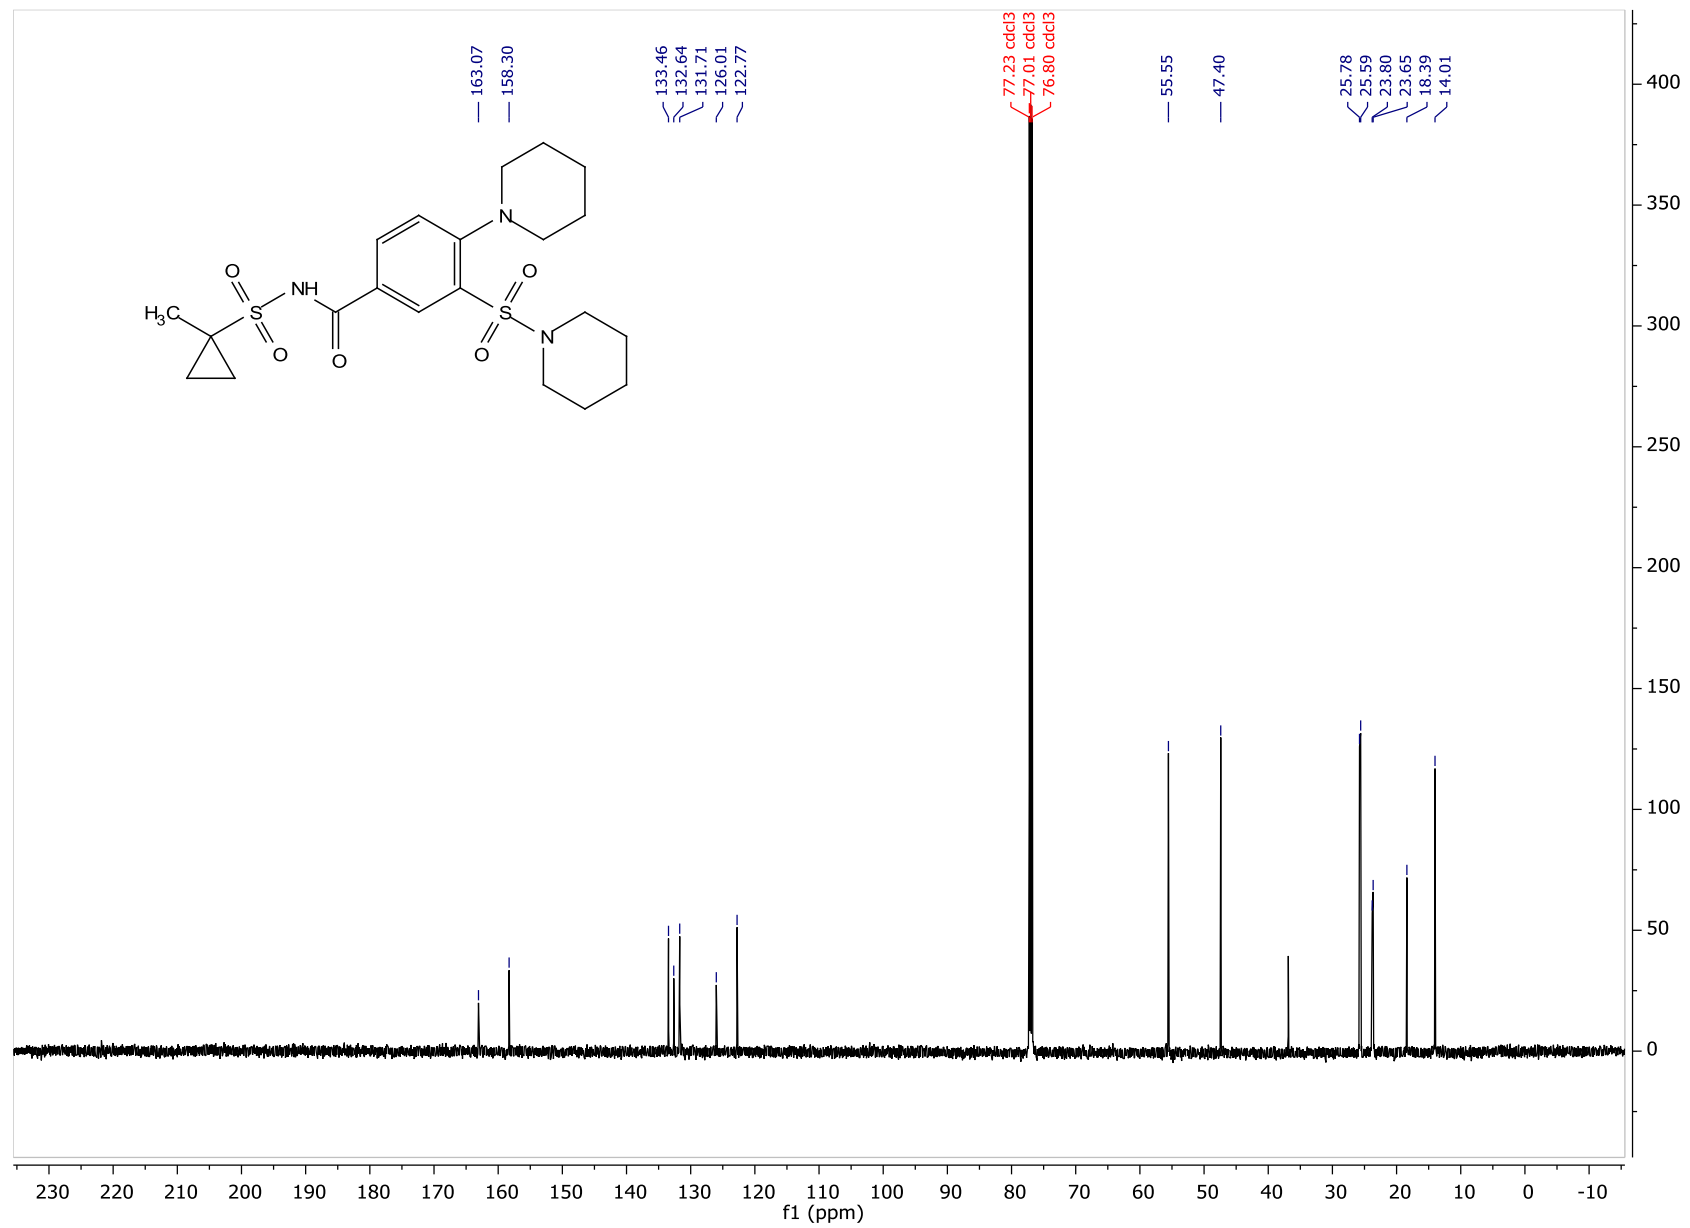

LC/MS spectrum of Z4886816304

Ret\_Time: 1.562 min

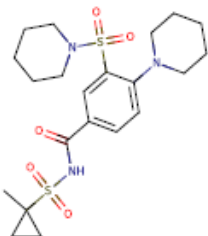

Mol Wt 469.62  
Exact Mass 469.2

| # | Time  | Area% |
|---|-------|-------|
| 1 | 1.562 | 95.49 |
| 2 | 1.588 | 2.08  |
| 3 | 1.675 | 2.43  |

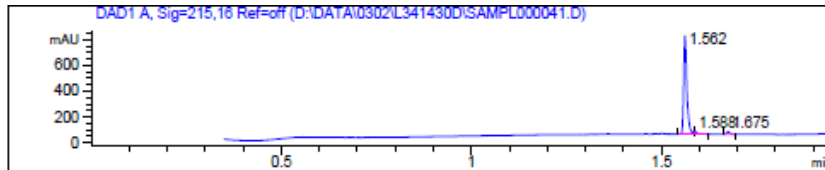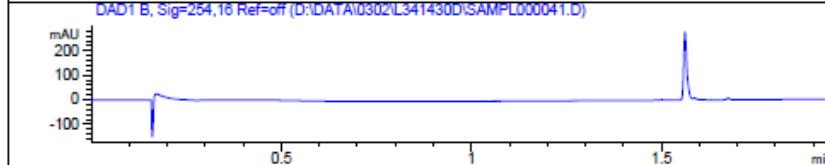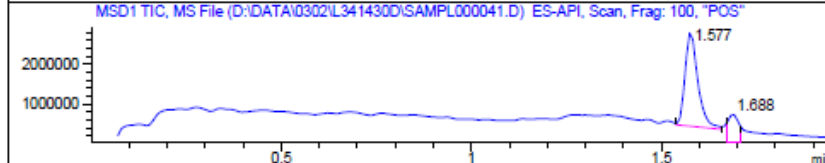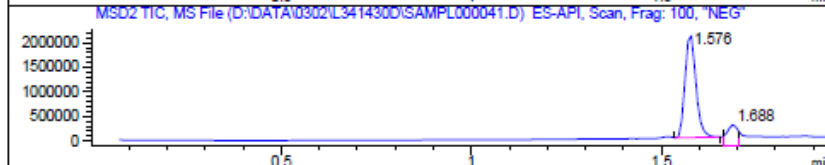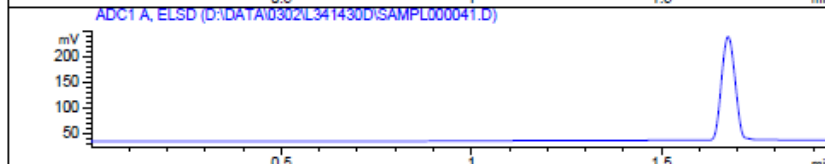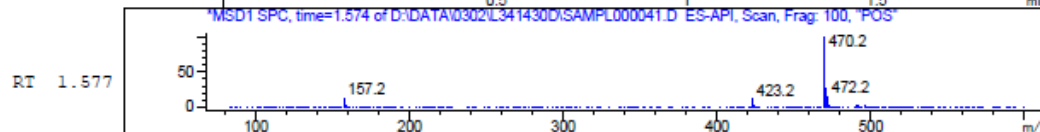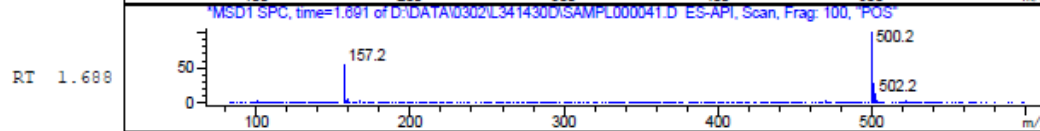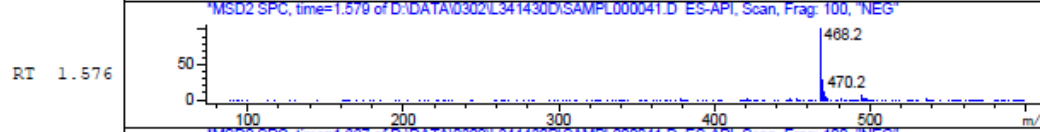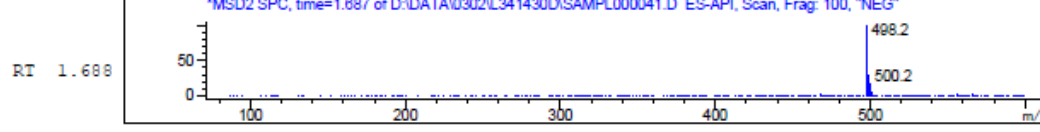

<sup>1</sup>H NMR spectrum of Z4886816337

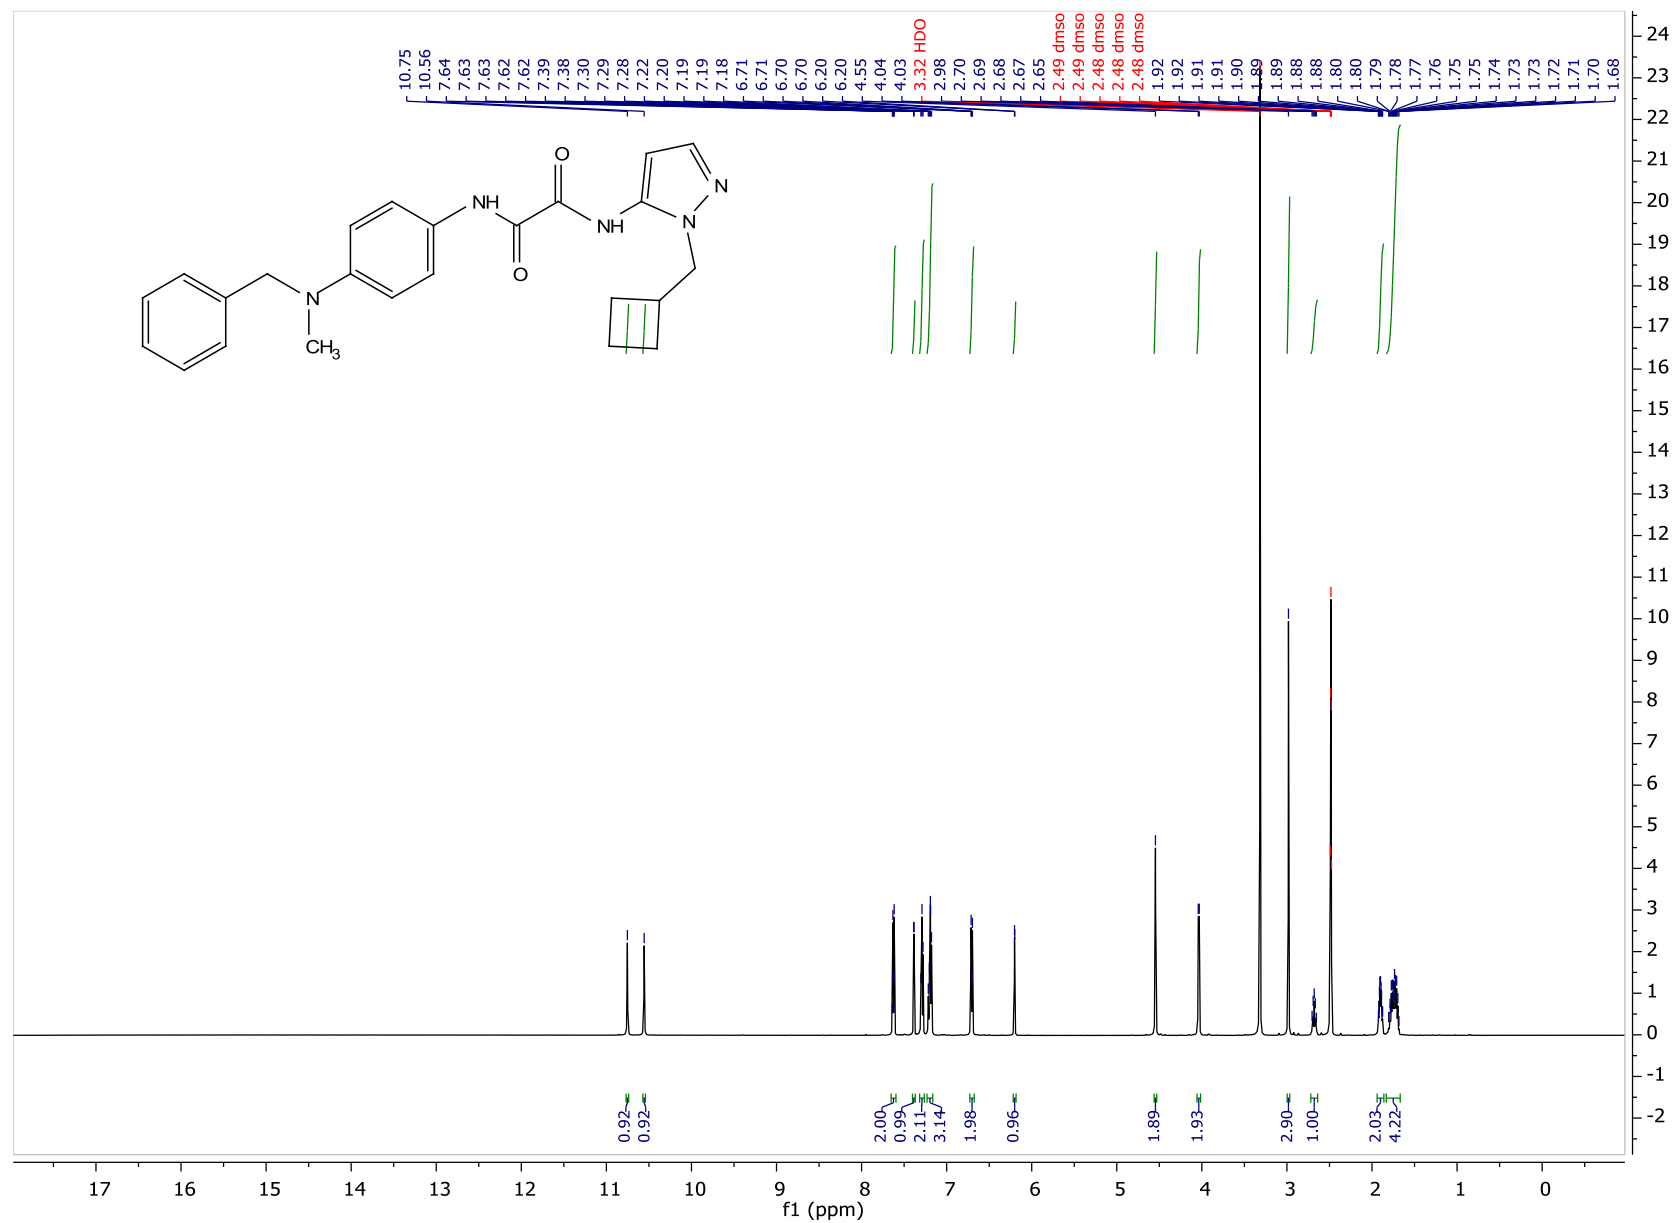

<sup>13</sup>C NMR spectrum of Z4886816337

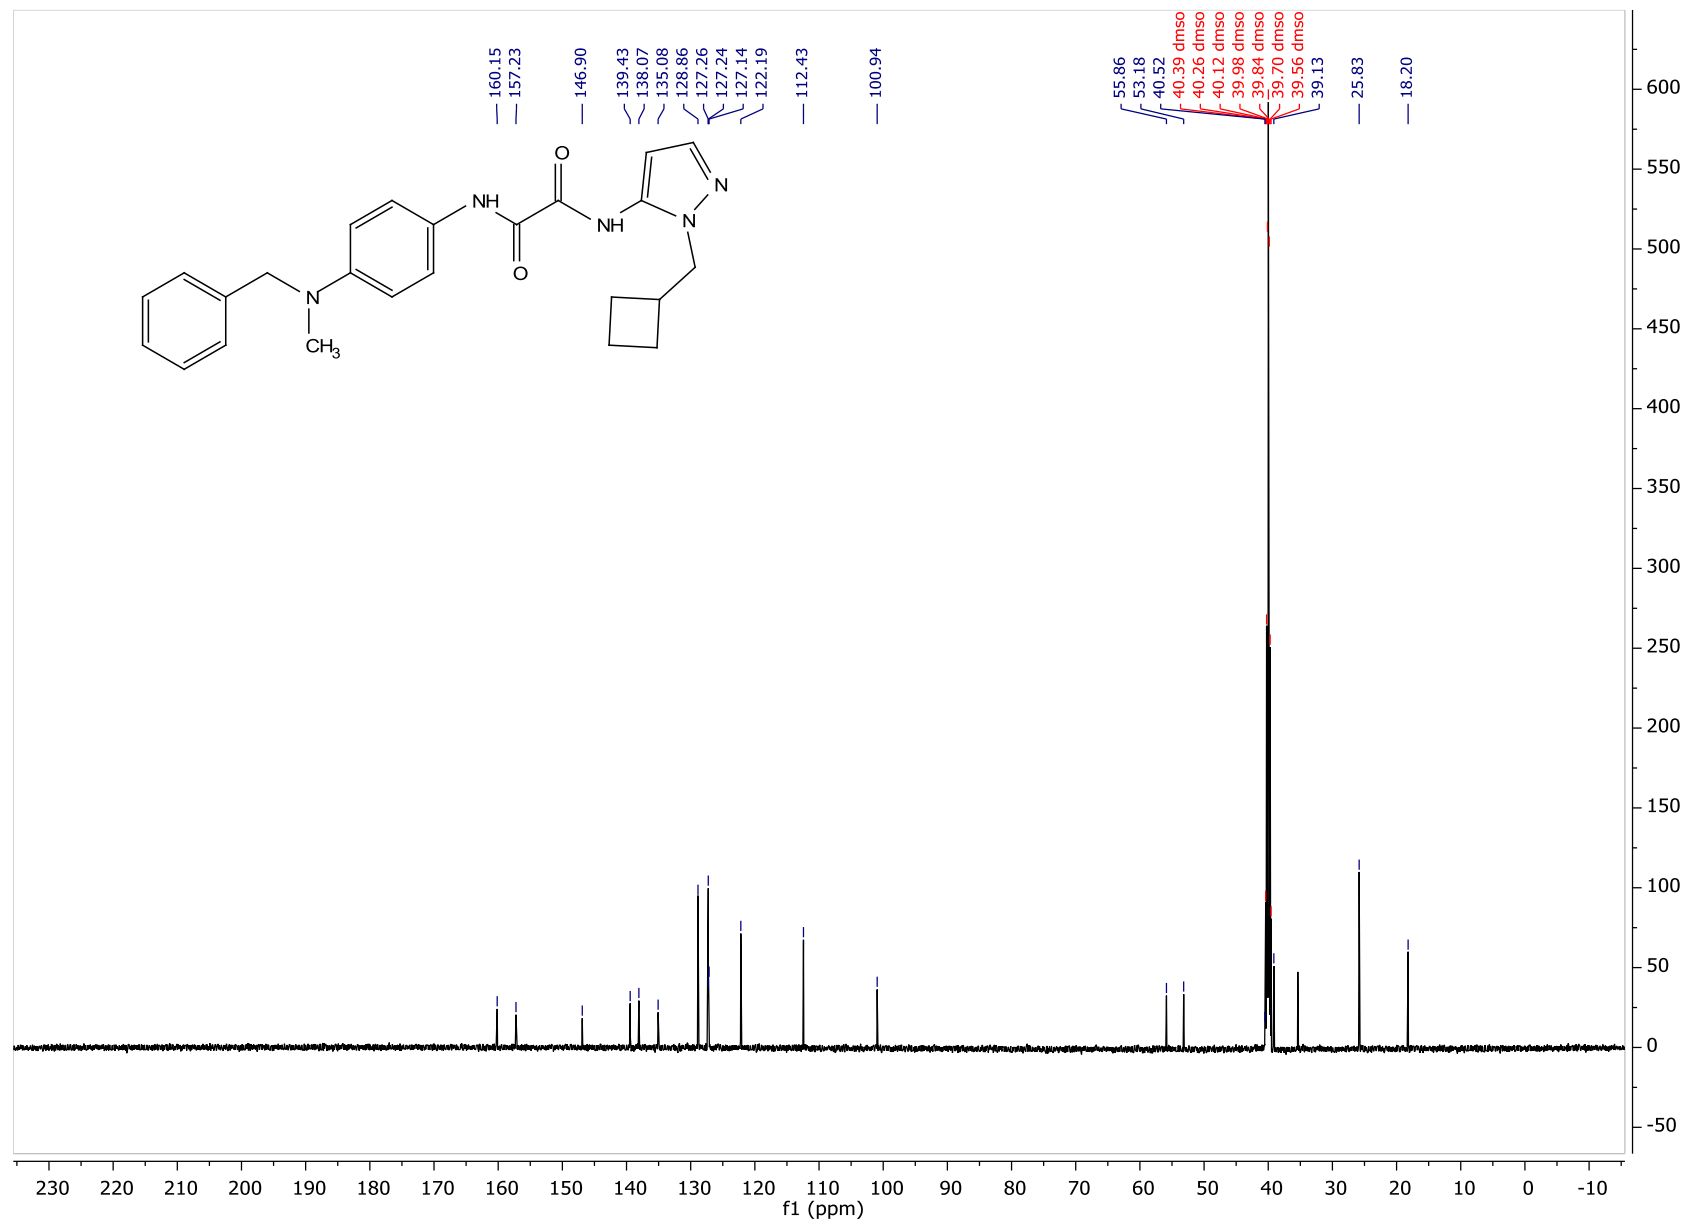

LC/MS spectrum of Z4886816337

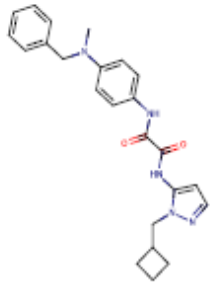

Mol Wt 417.5  
 Exact Mass 417.25

| # | Time  | Area%  |
|---|-------|--------|
| 1 | 1.516 | 100.00 |

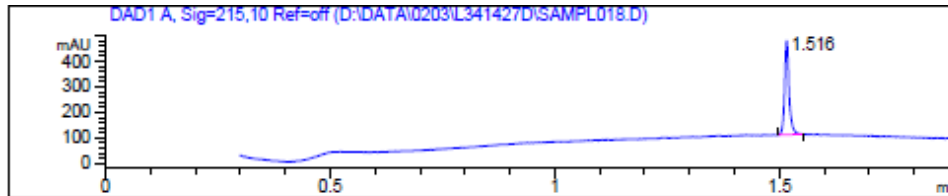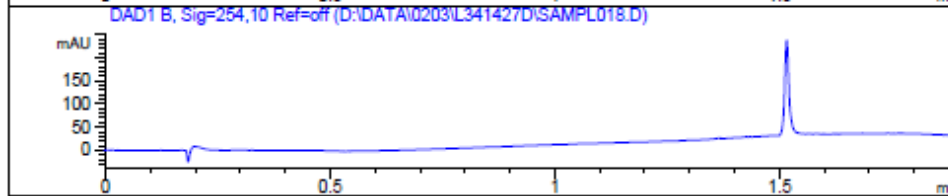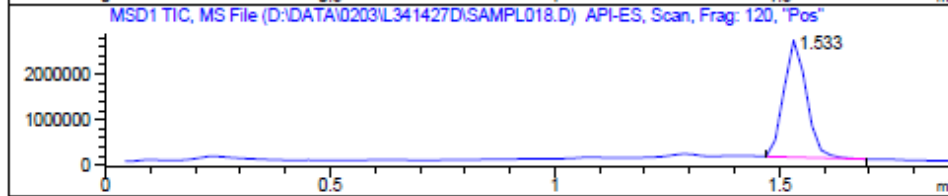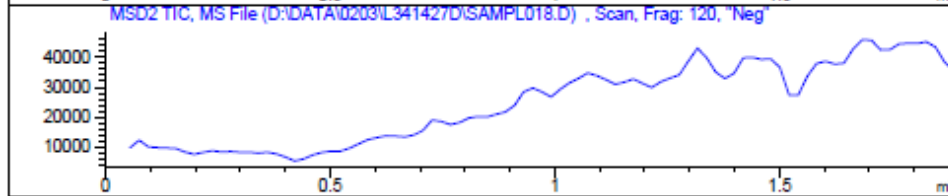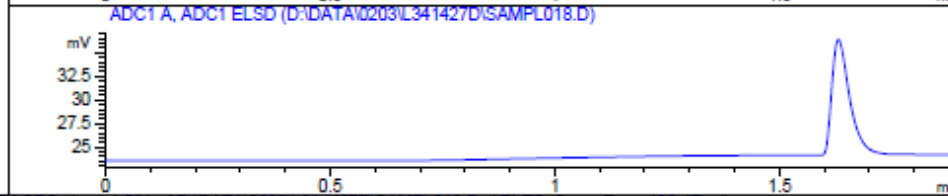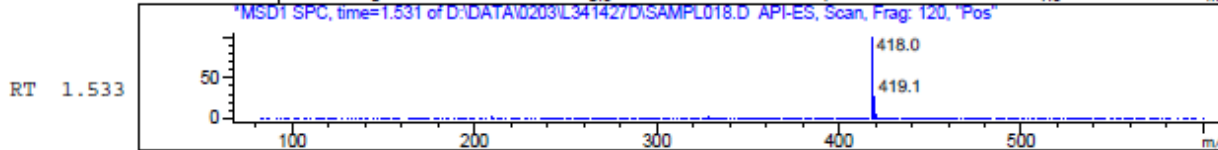

RT 1.533

<sup>1</sup>H NMR spectrum of Z4886816371

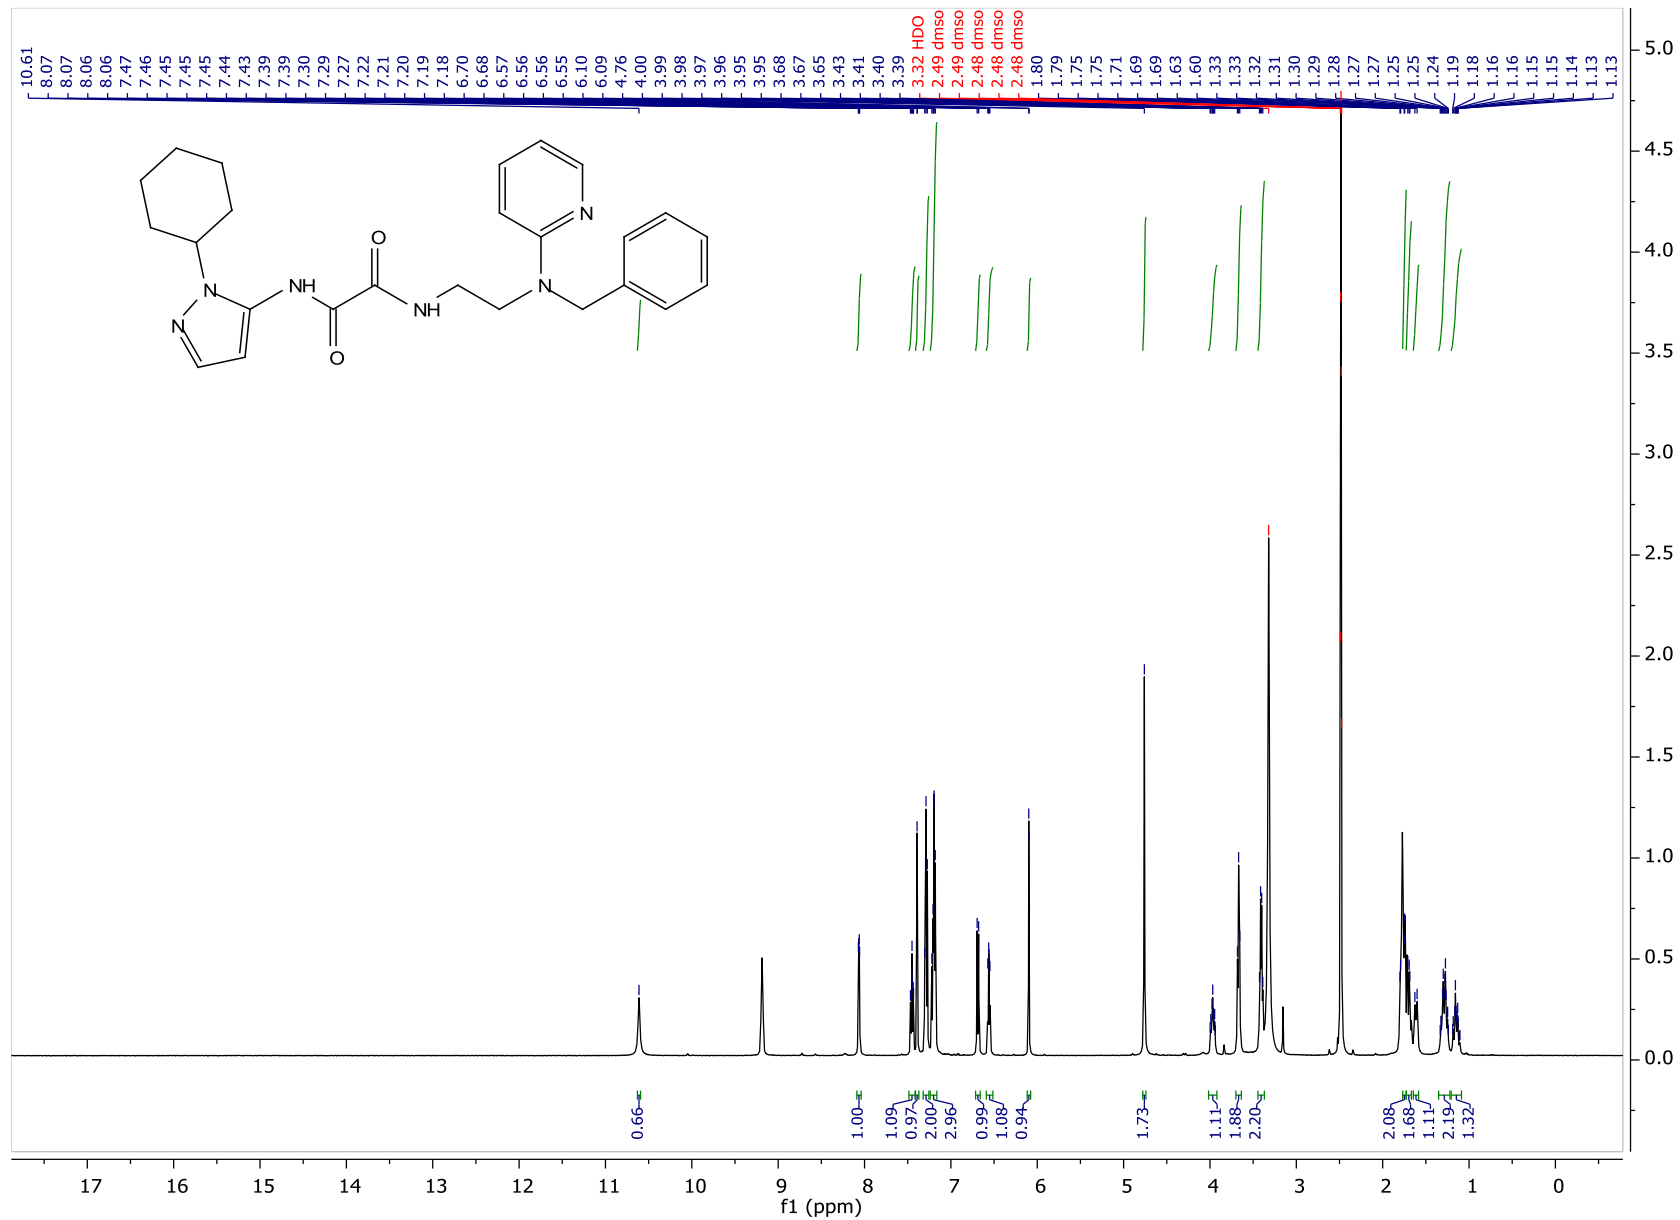

<sup>13</sup>C NMR spectrum of Z4886816371

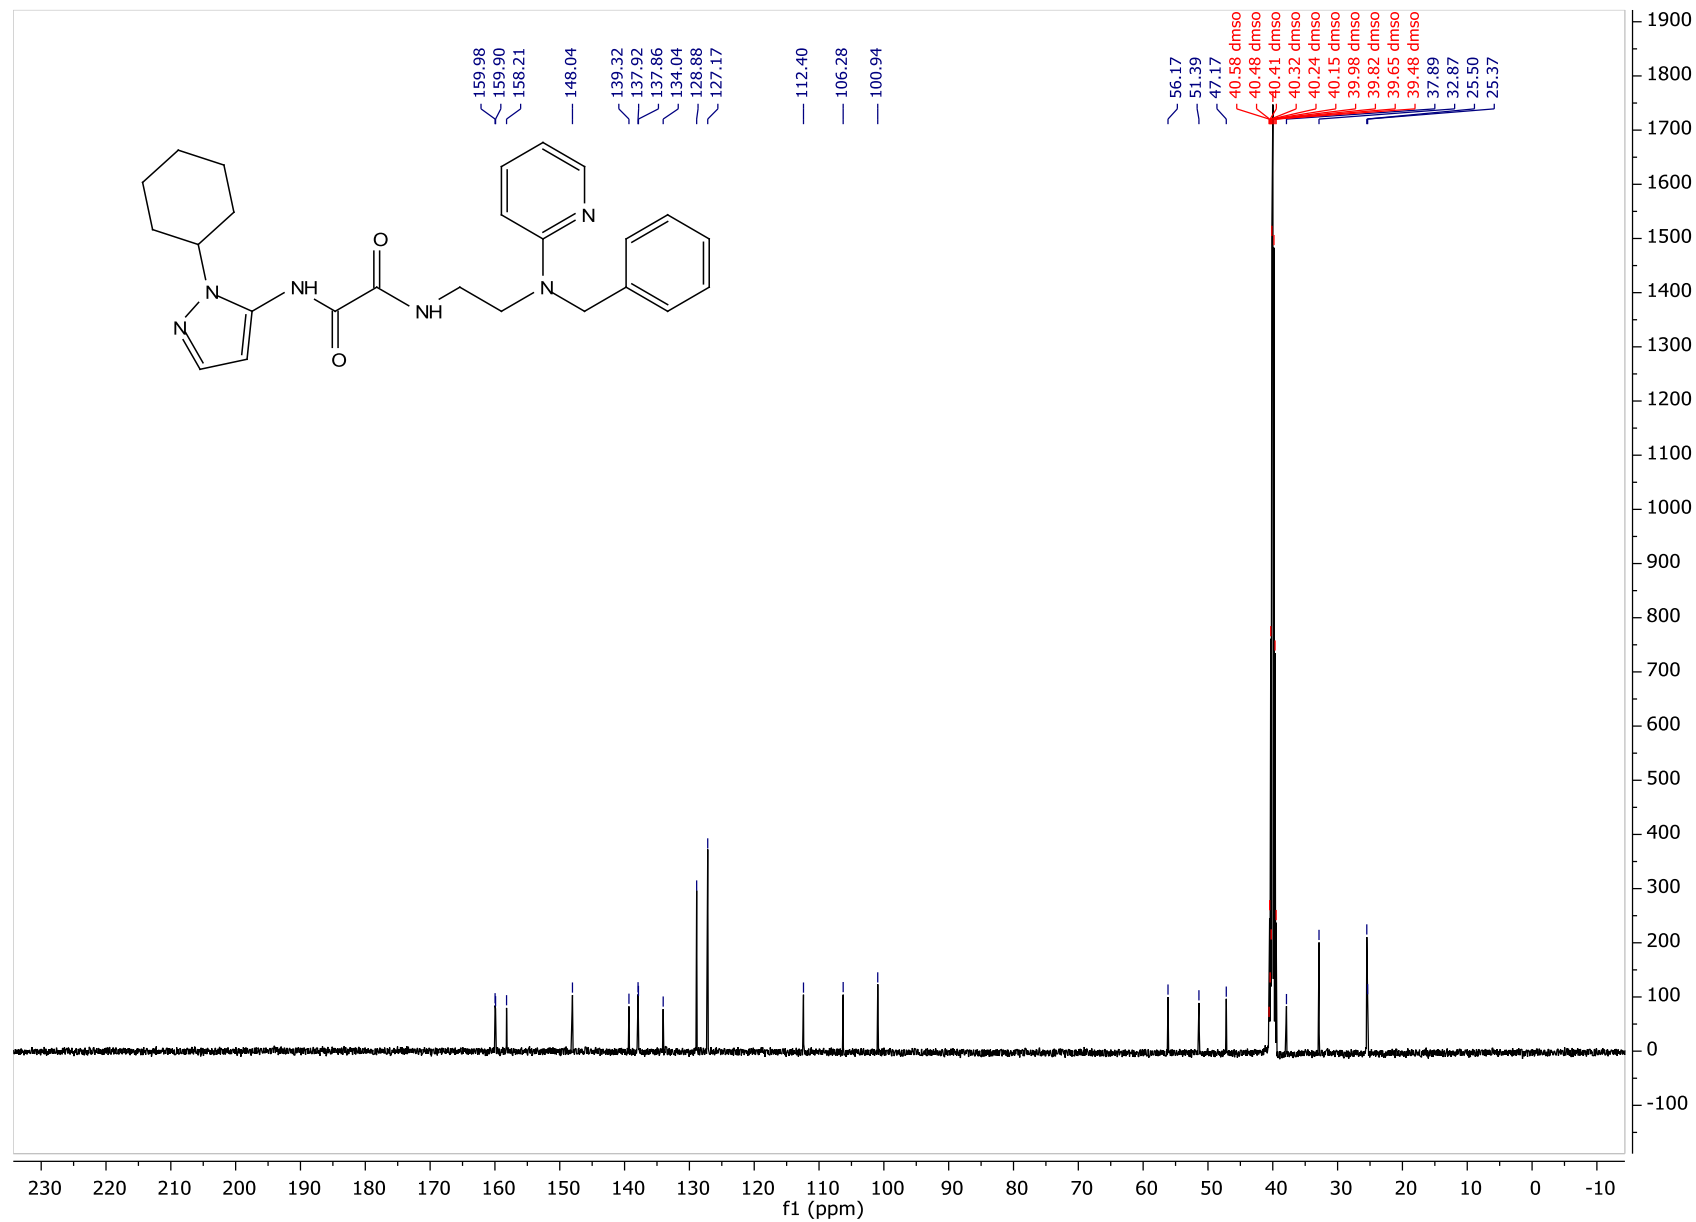

LC/MS spectrum of Z4886816371

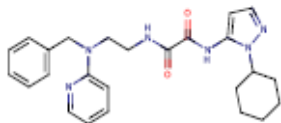

Mol Wt 446.54  
 Exact Mass 446.28

| # | Time  | Area%  |
|---|-------|--------|
| 1 | 1.230 | 100.00 |

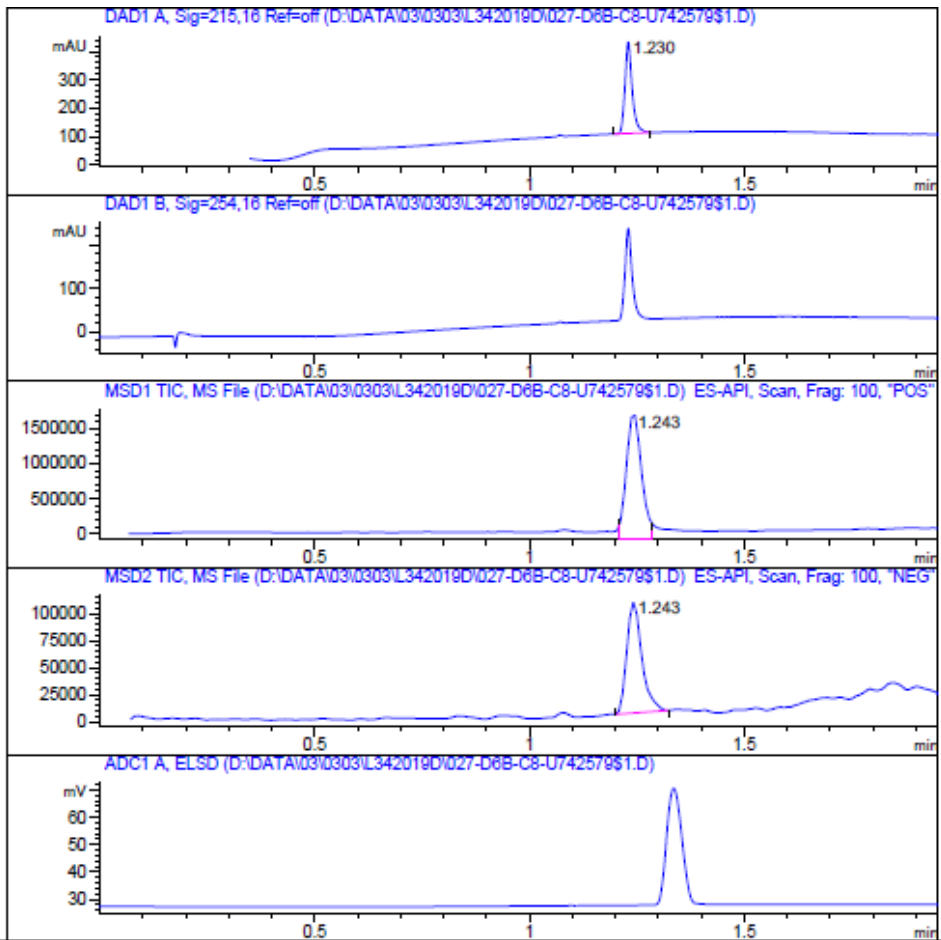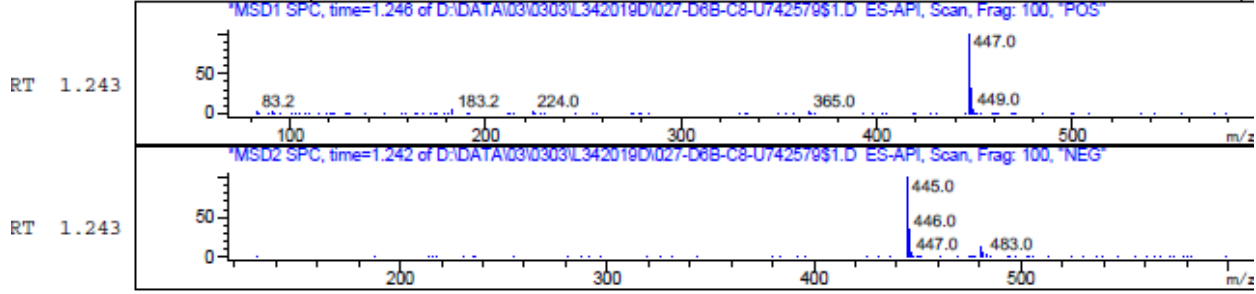



<sup>1</sup>H NMR spectrum of Z4886818373

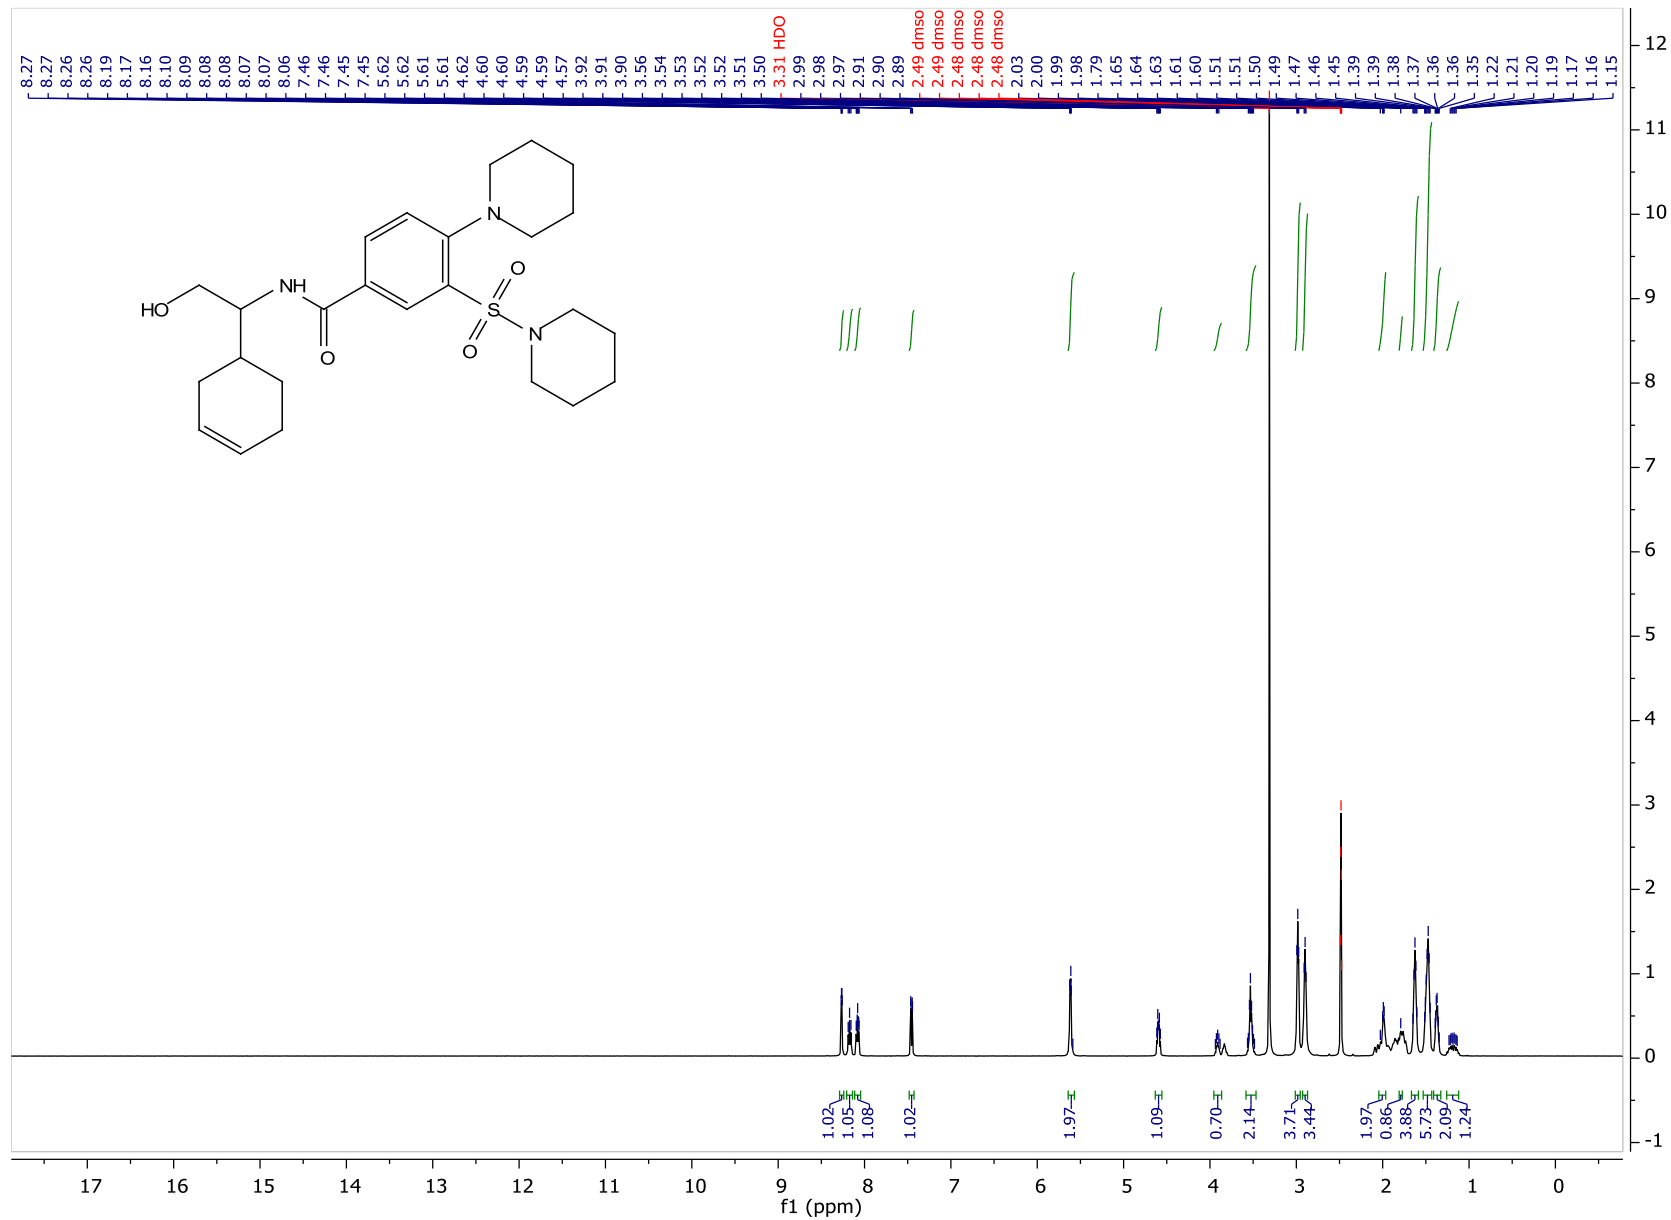

<sup>13</sup>C NMR spectrum of Z4886818373

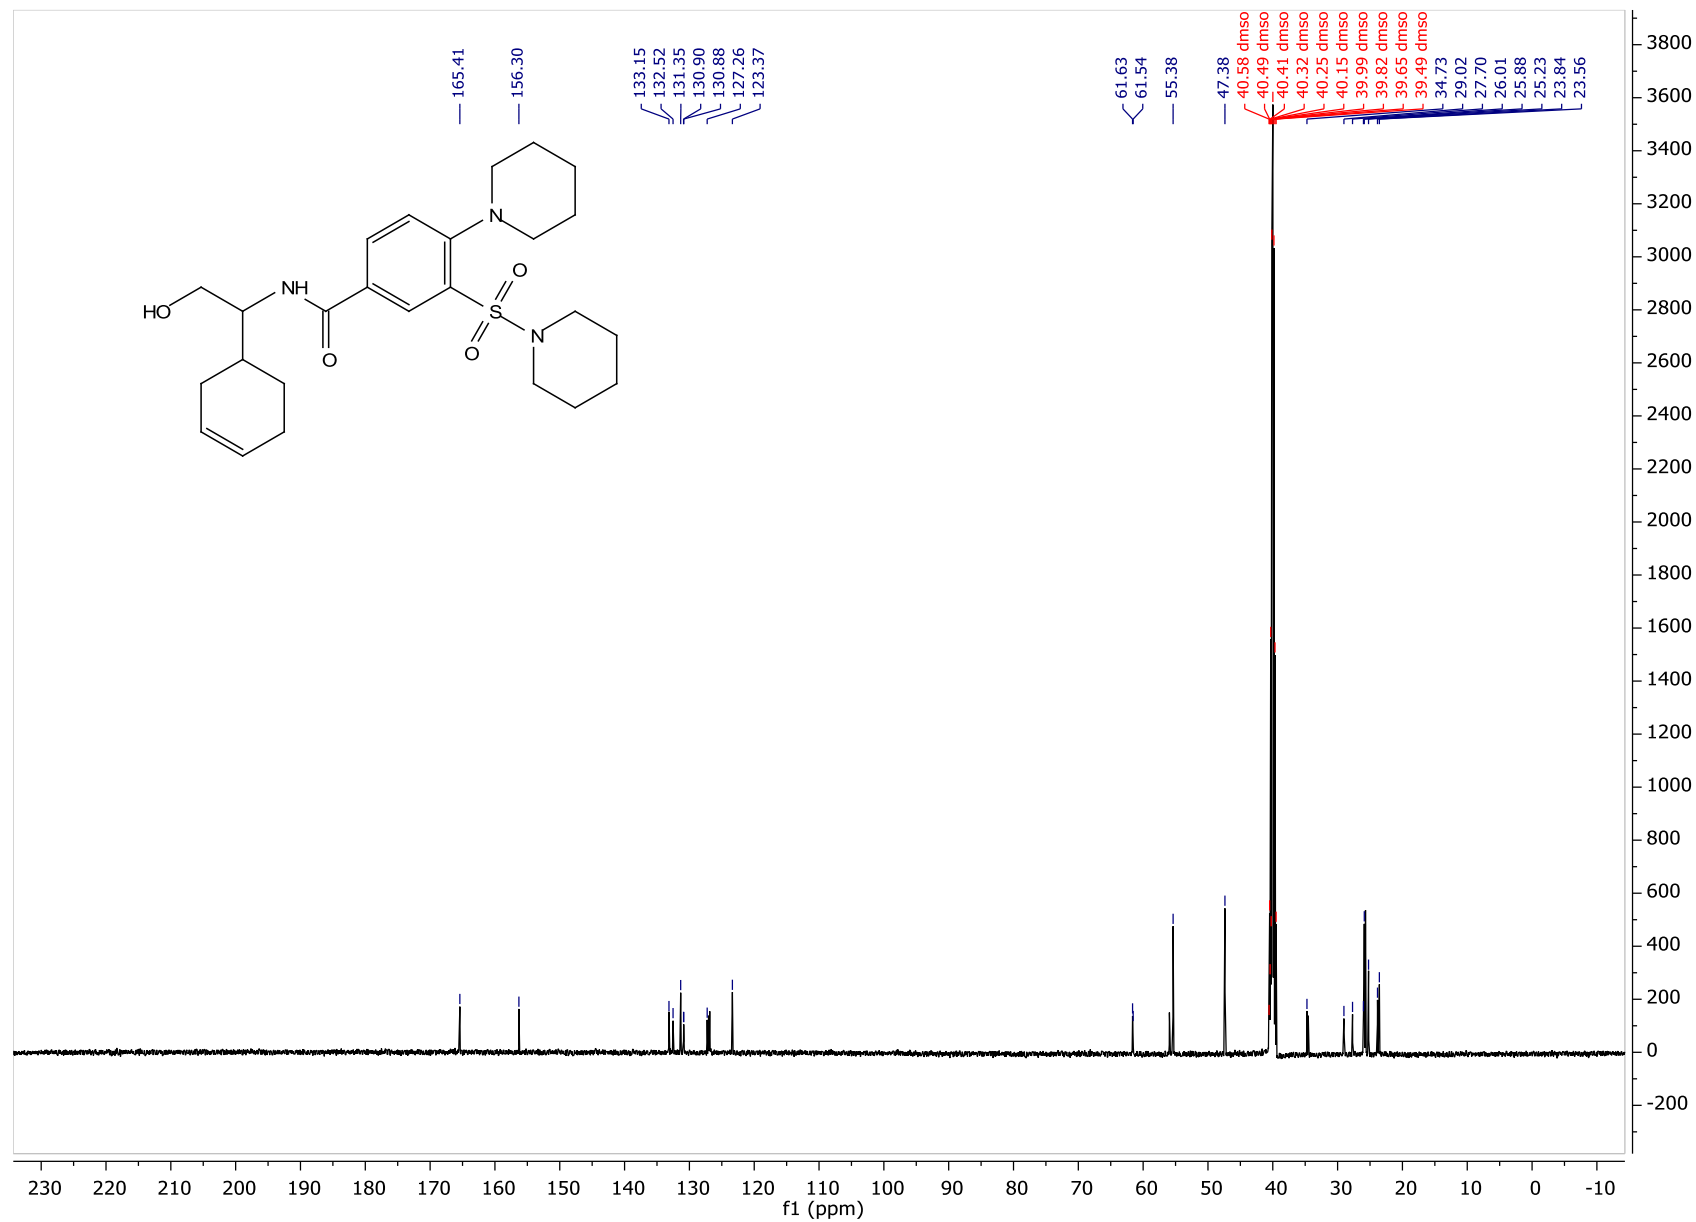

LC/MS spectrum of Z4886818373

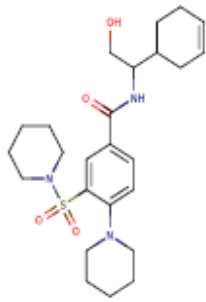

Mol Wt 475.64  
 Exact Mass 475.3

| # | Time  | Area%  |
|---|-------|--------|
| 1 | 1.364 | 100.00 |

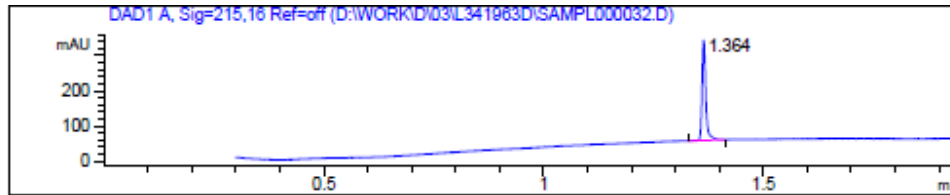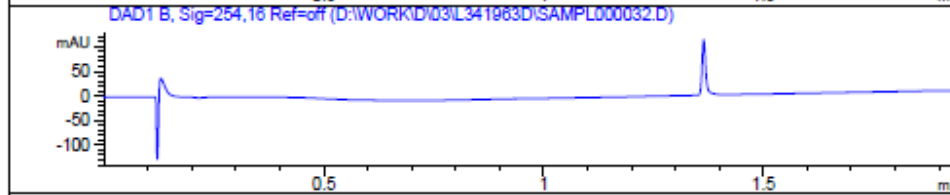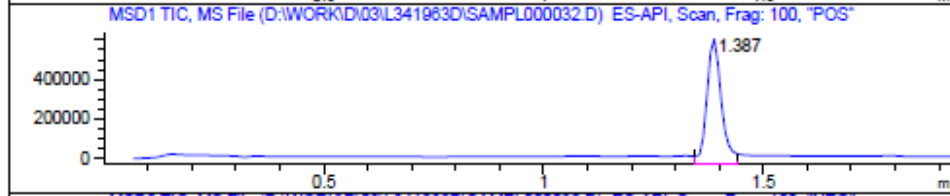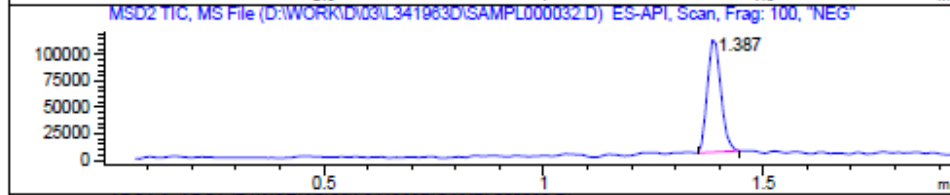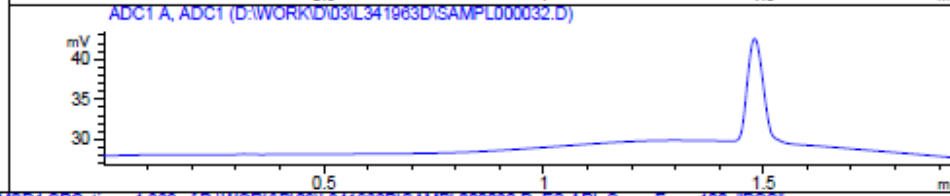

RT 1.387

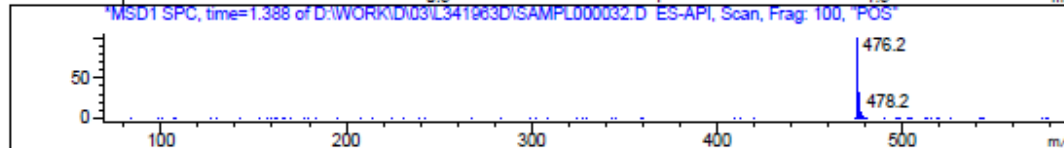

RT 1.387

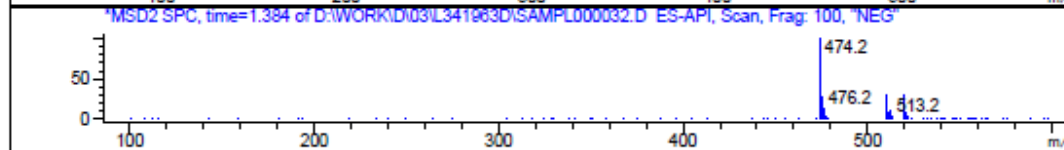

<sup>1</sup>H NMR spectrum of Z4886818380

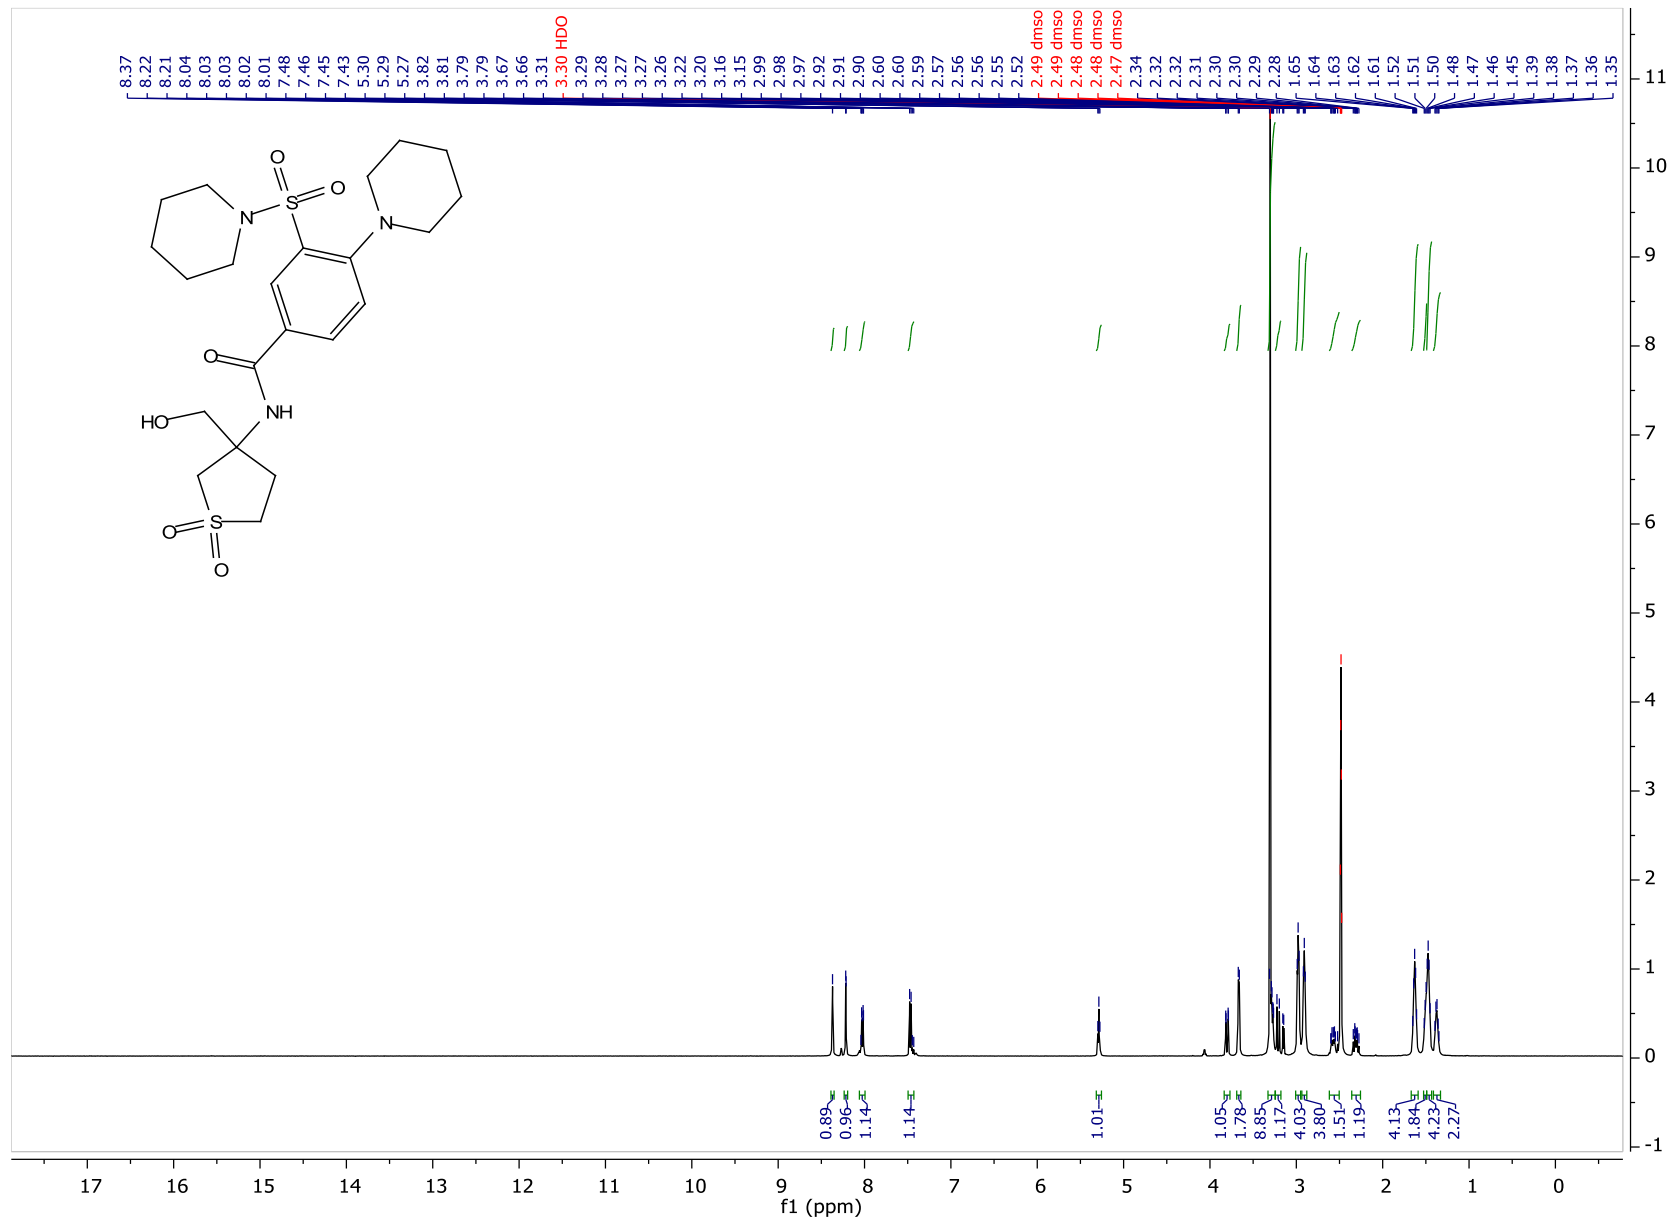

<sup>13</sup>C NMR spectrum of Z4886818380

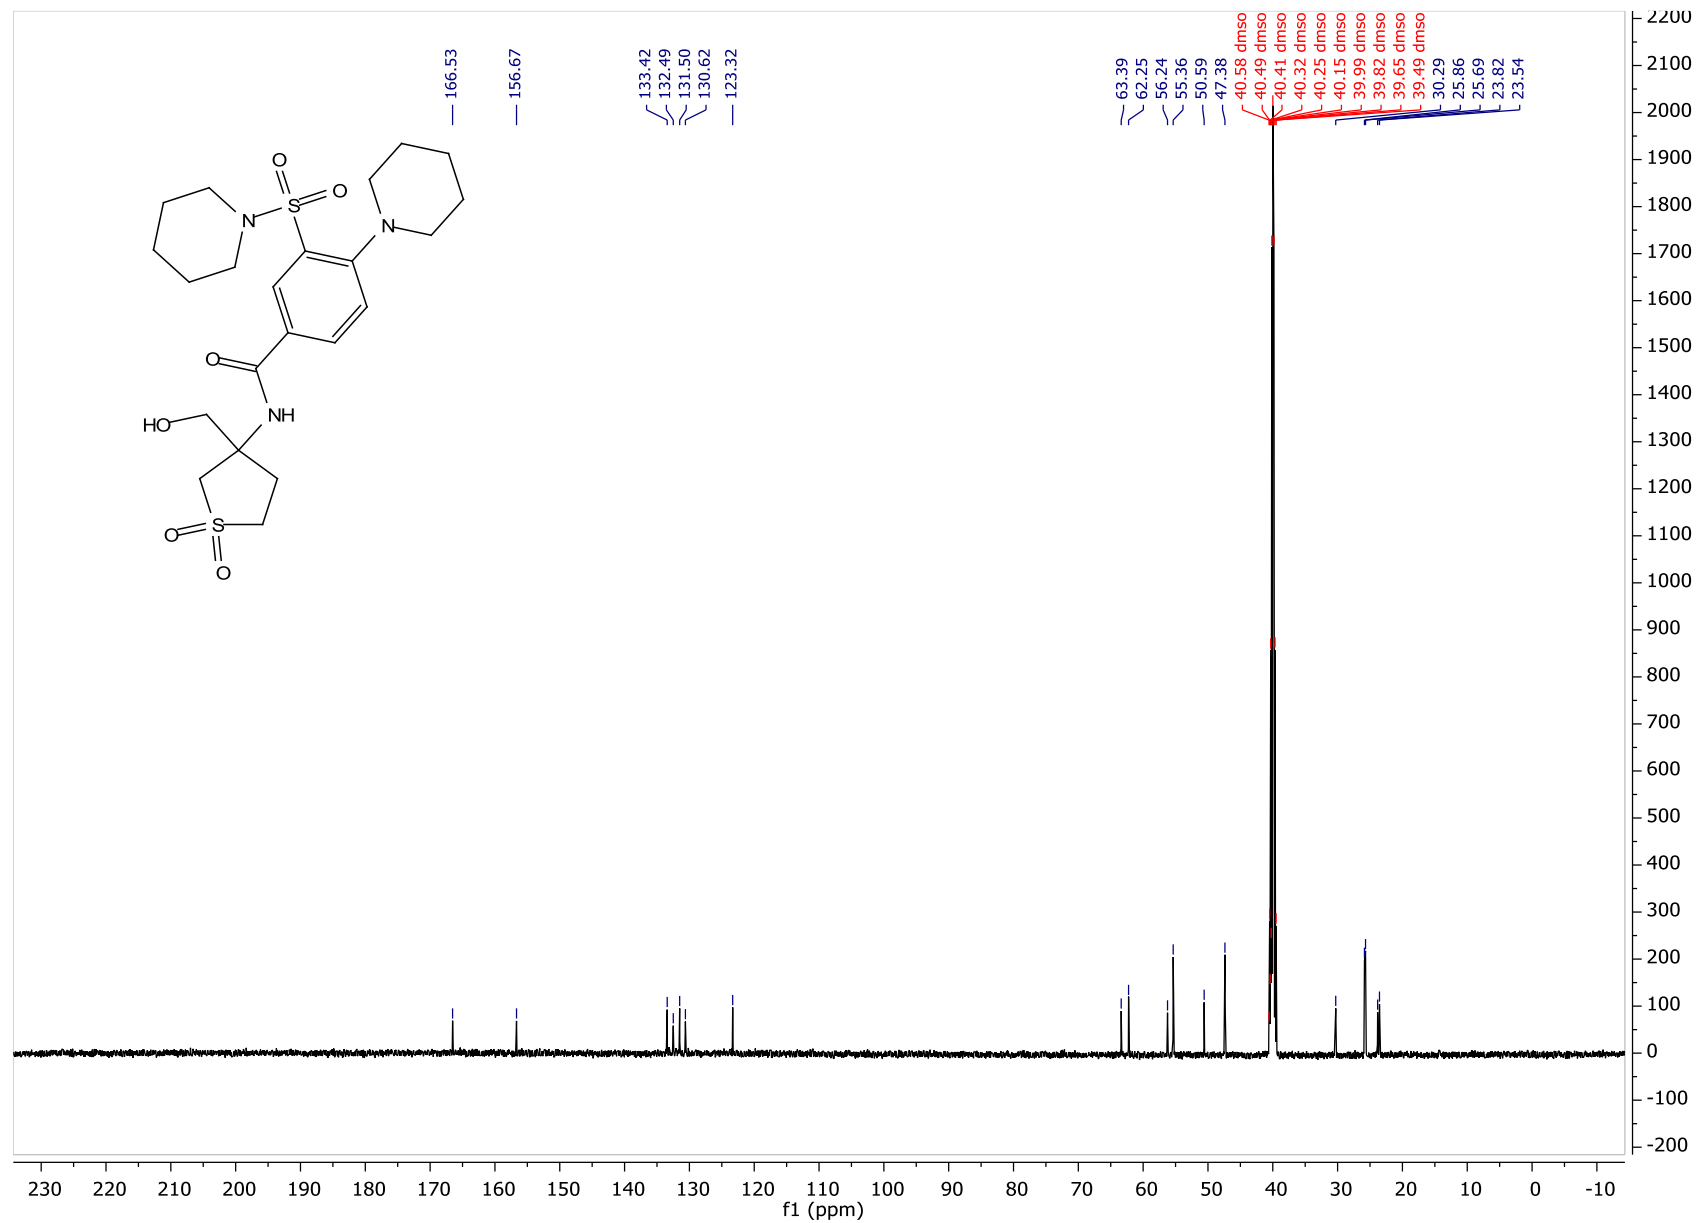

LC/MS spectrum of Z4886818380

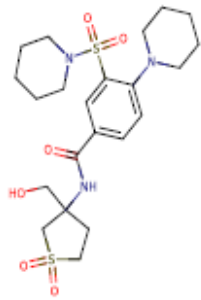

Mol Wt 499.64  
Exact Mass 499.21

| # | Time  | Area%  |
|---|-------|--------|
| 1 | 1.201 | 100.00 |

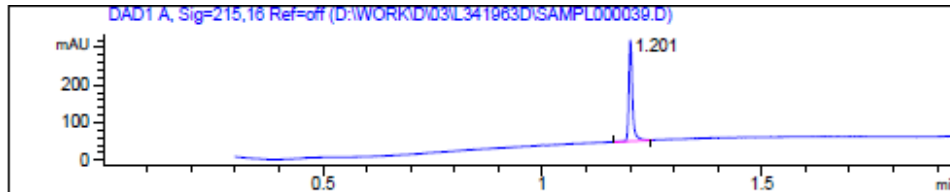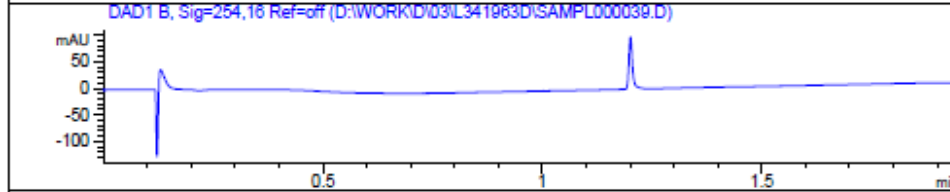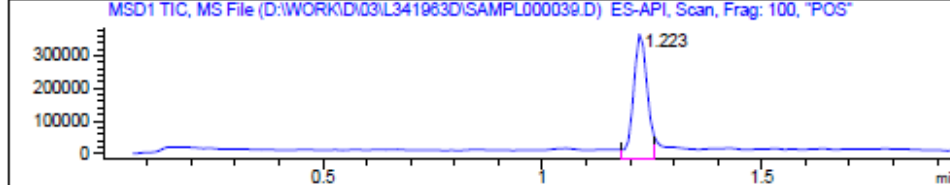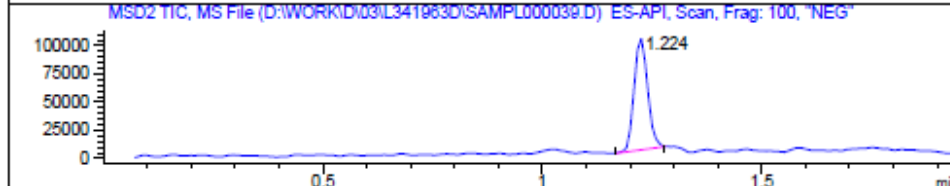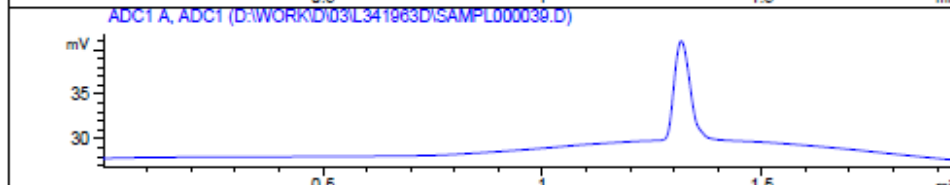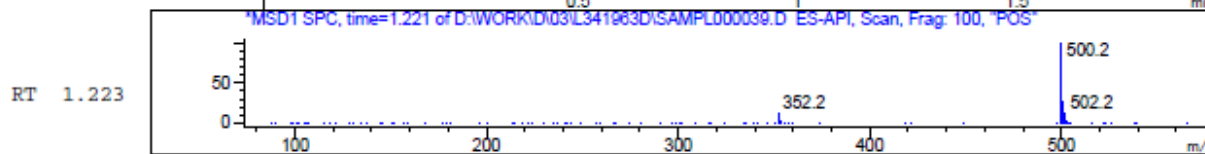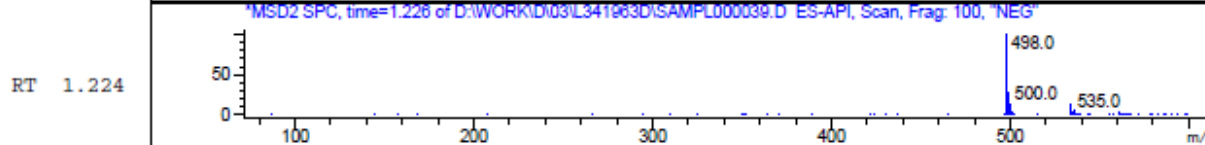

<sup>1</sup>H NMR spectrum of Z4886818388

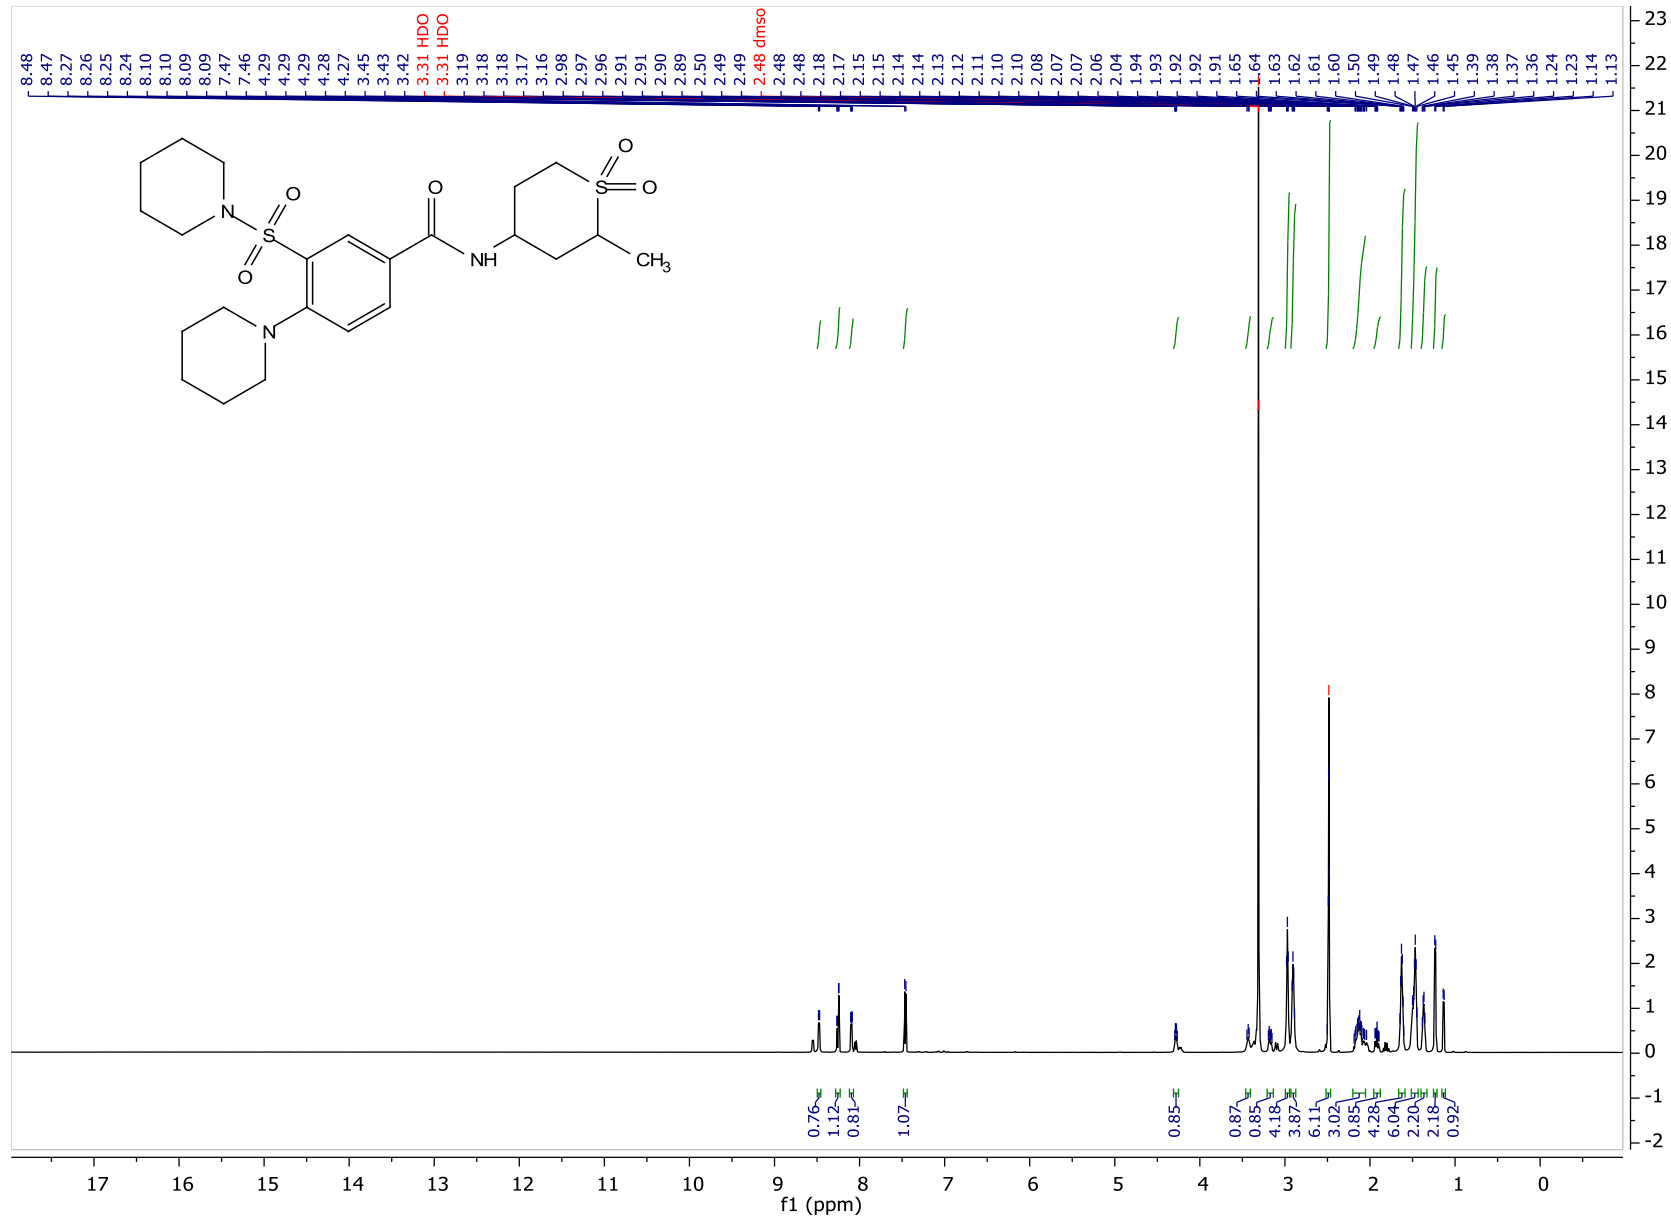

<sup>13</sup>C NMR spectrum of Z4886818388

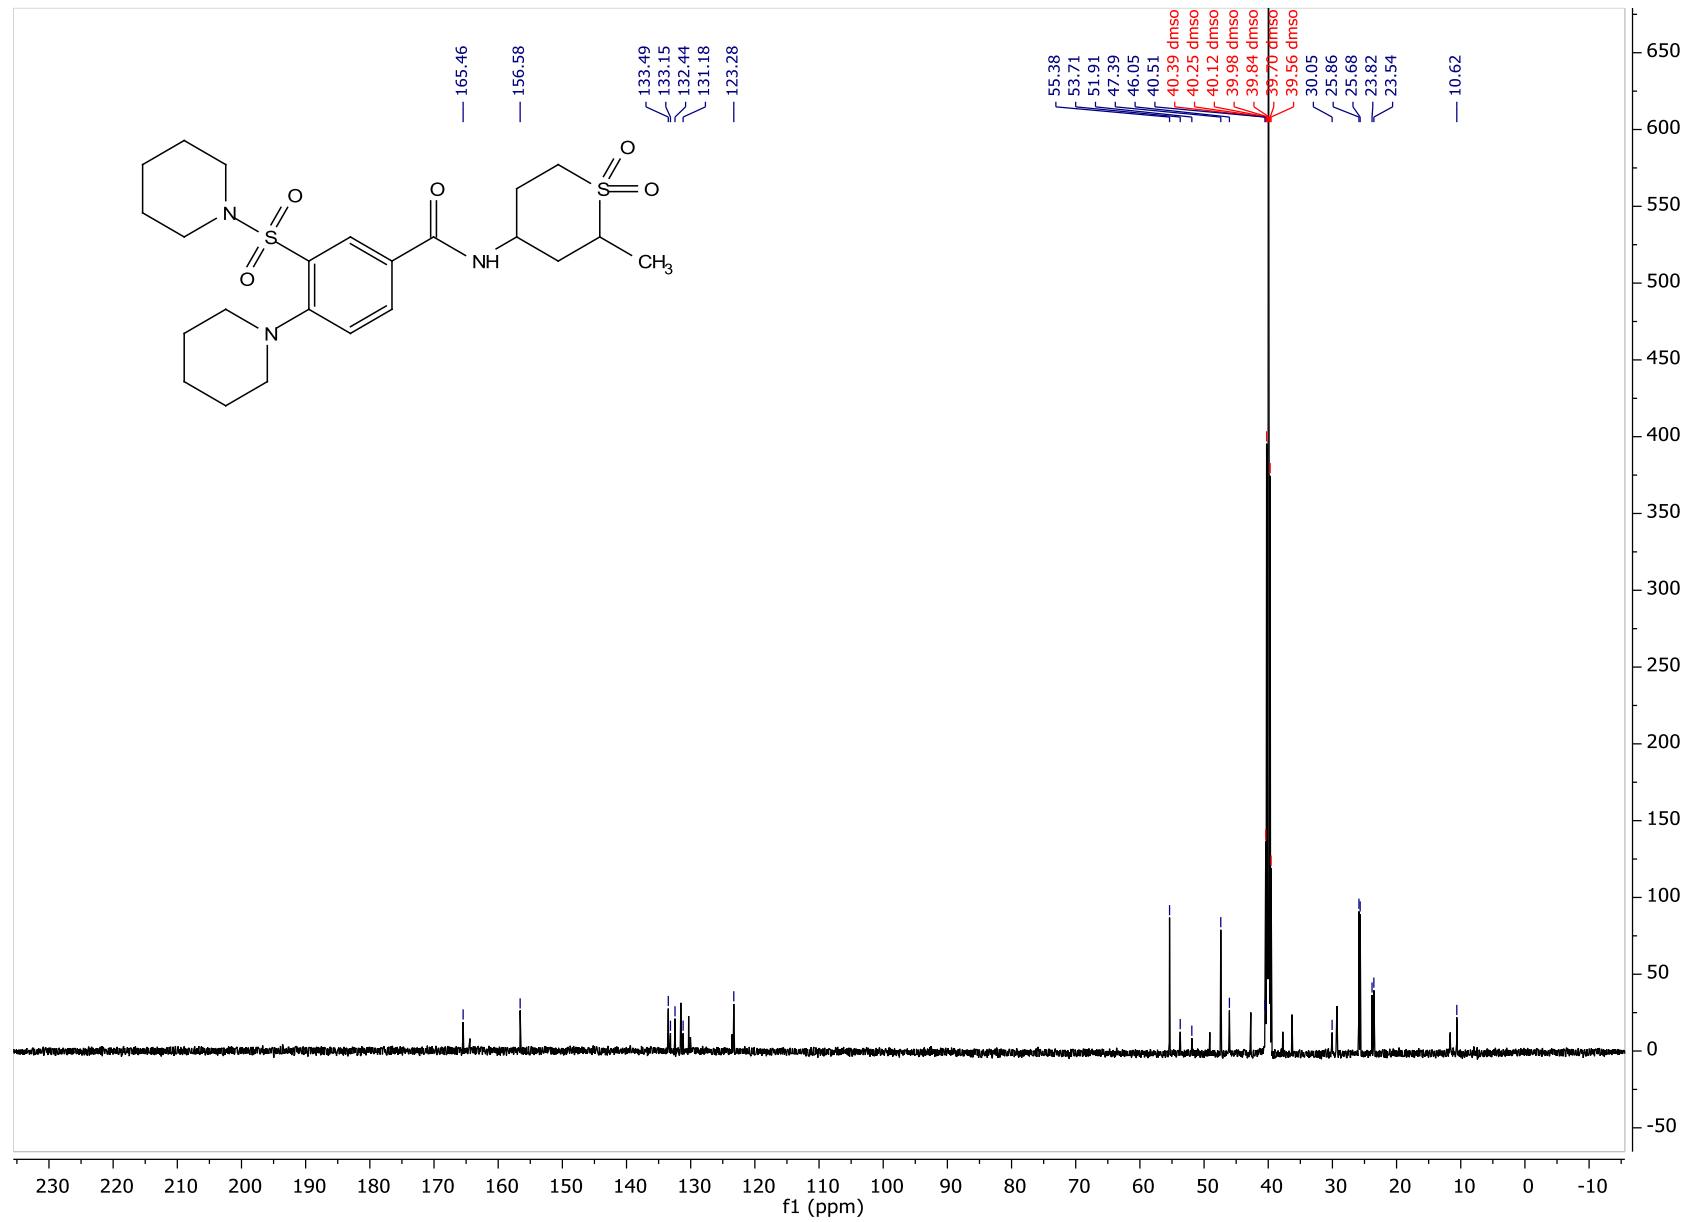



LC/MS spectrum of Z4886818388

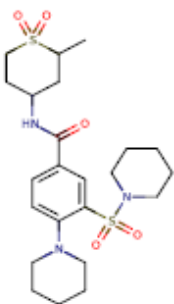

Mol Wt 497.67  
 Exact Mass 497.24

| # | Time  | Area%  |
|---|-------|--------|
| 1 | 1.439 | 100.00 |

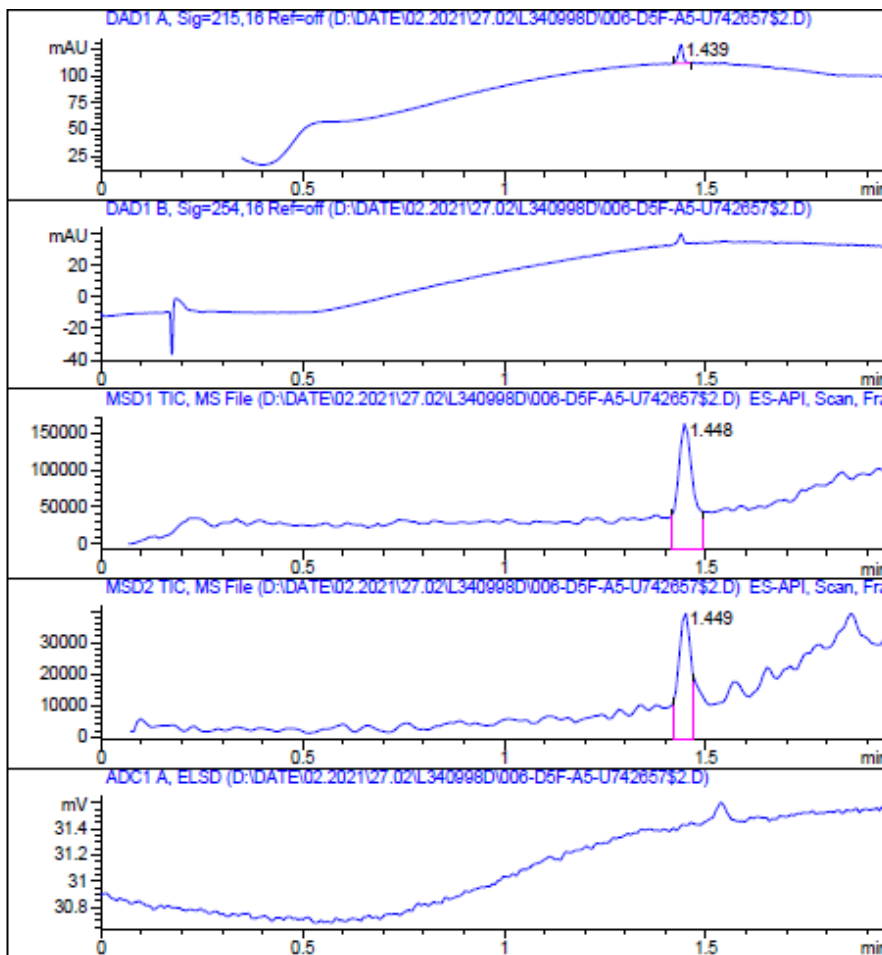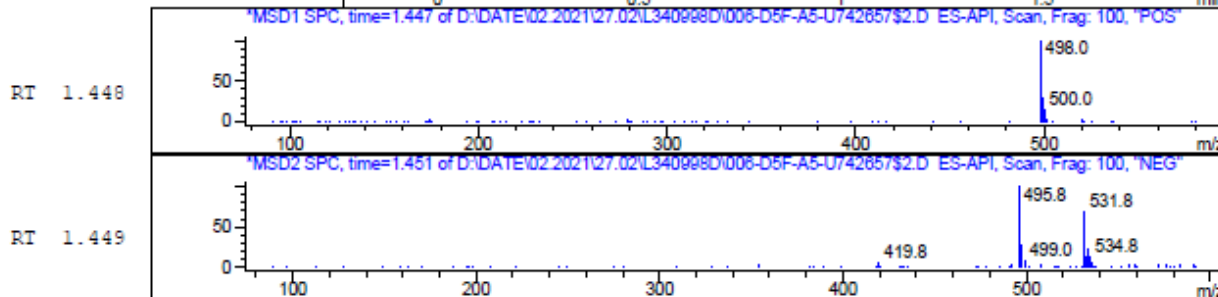

<sup>1</sup>H NMR spectrum of Z4886818395

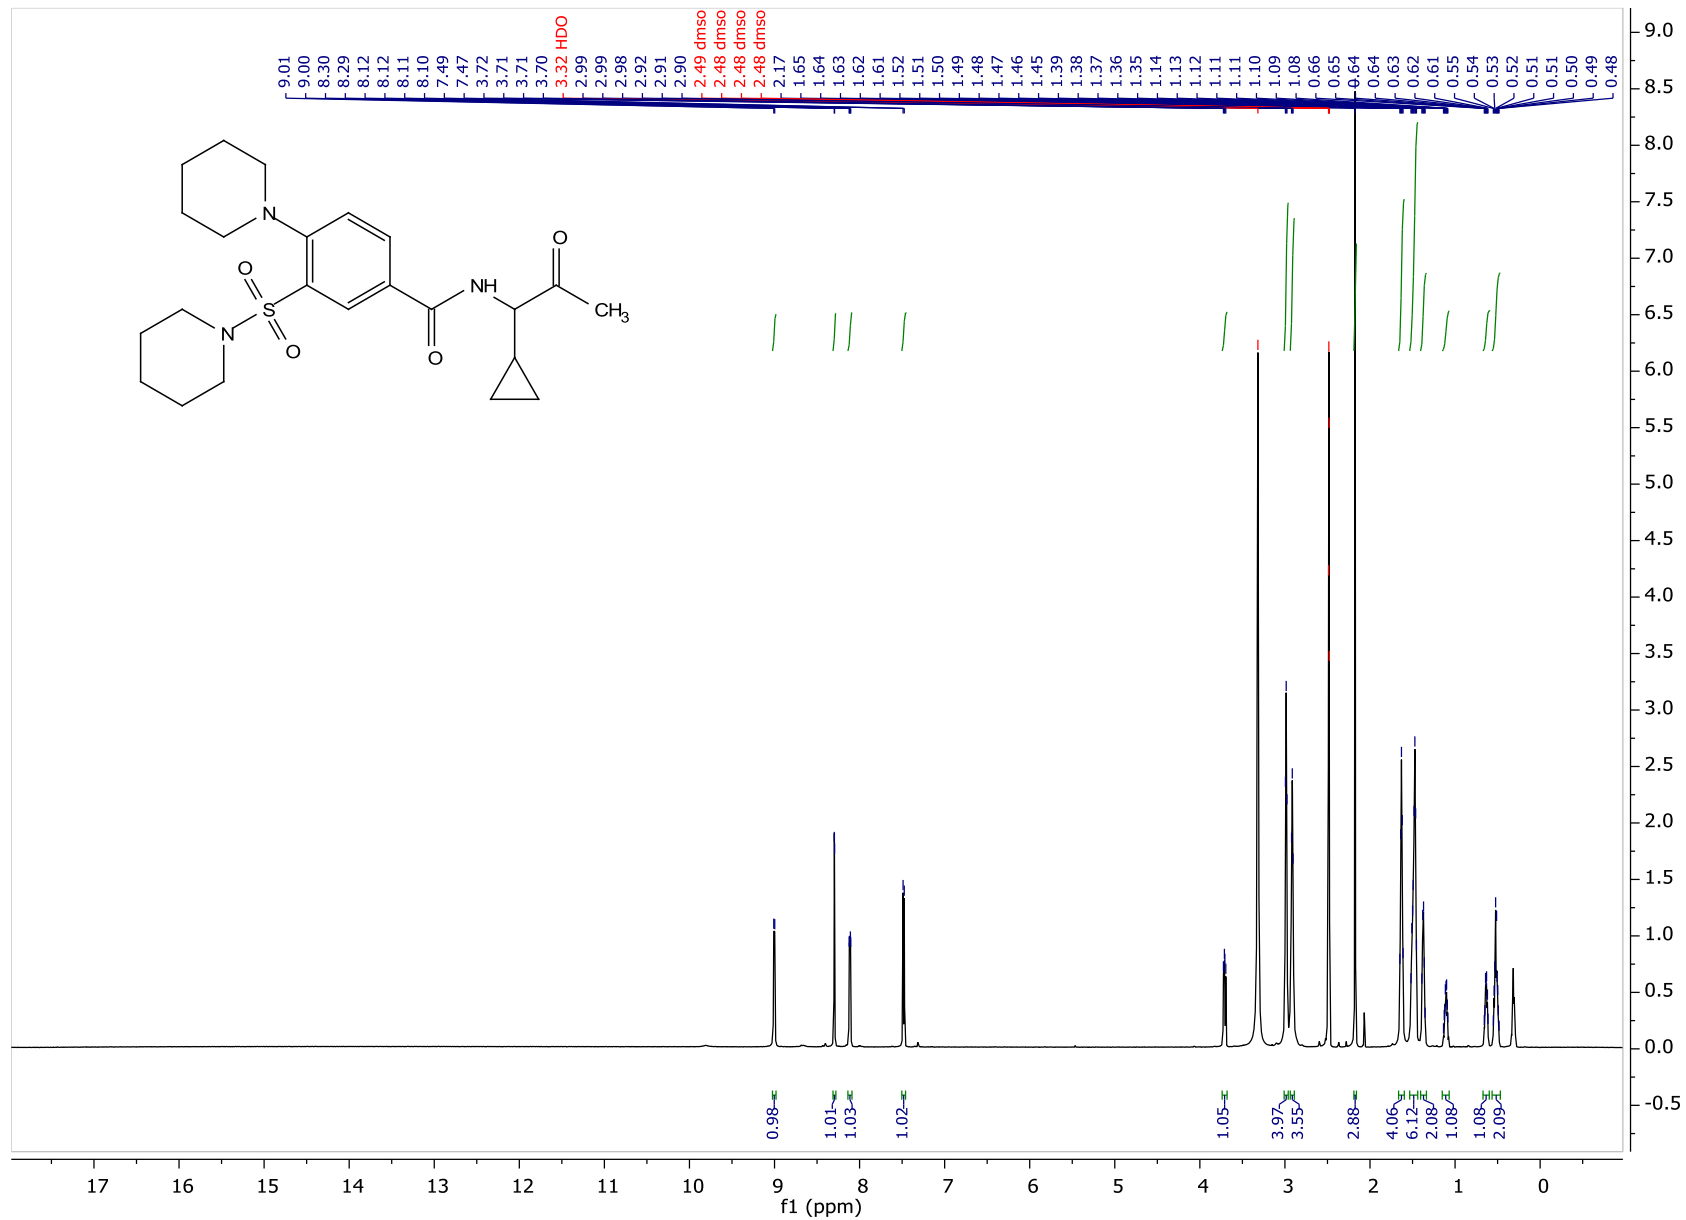

<sup>13</sup>C NMR spectrum of Z4886818395

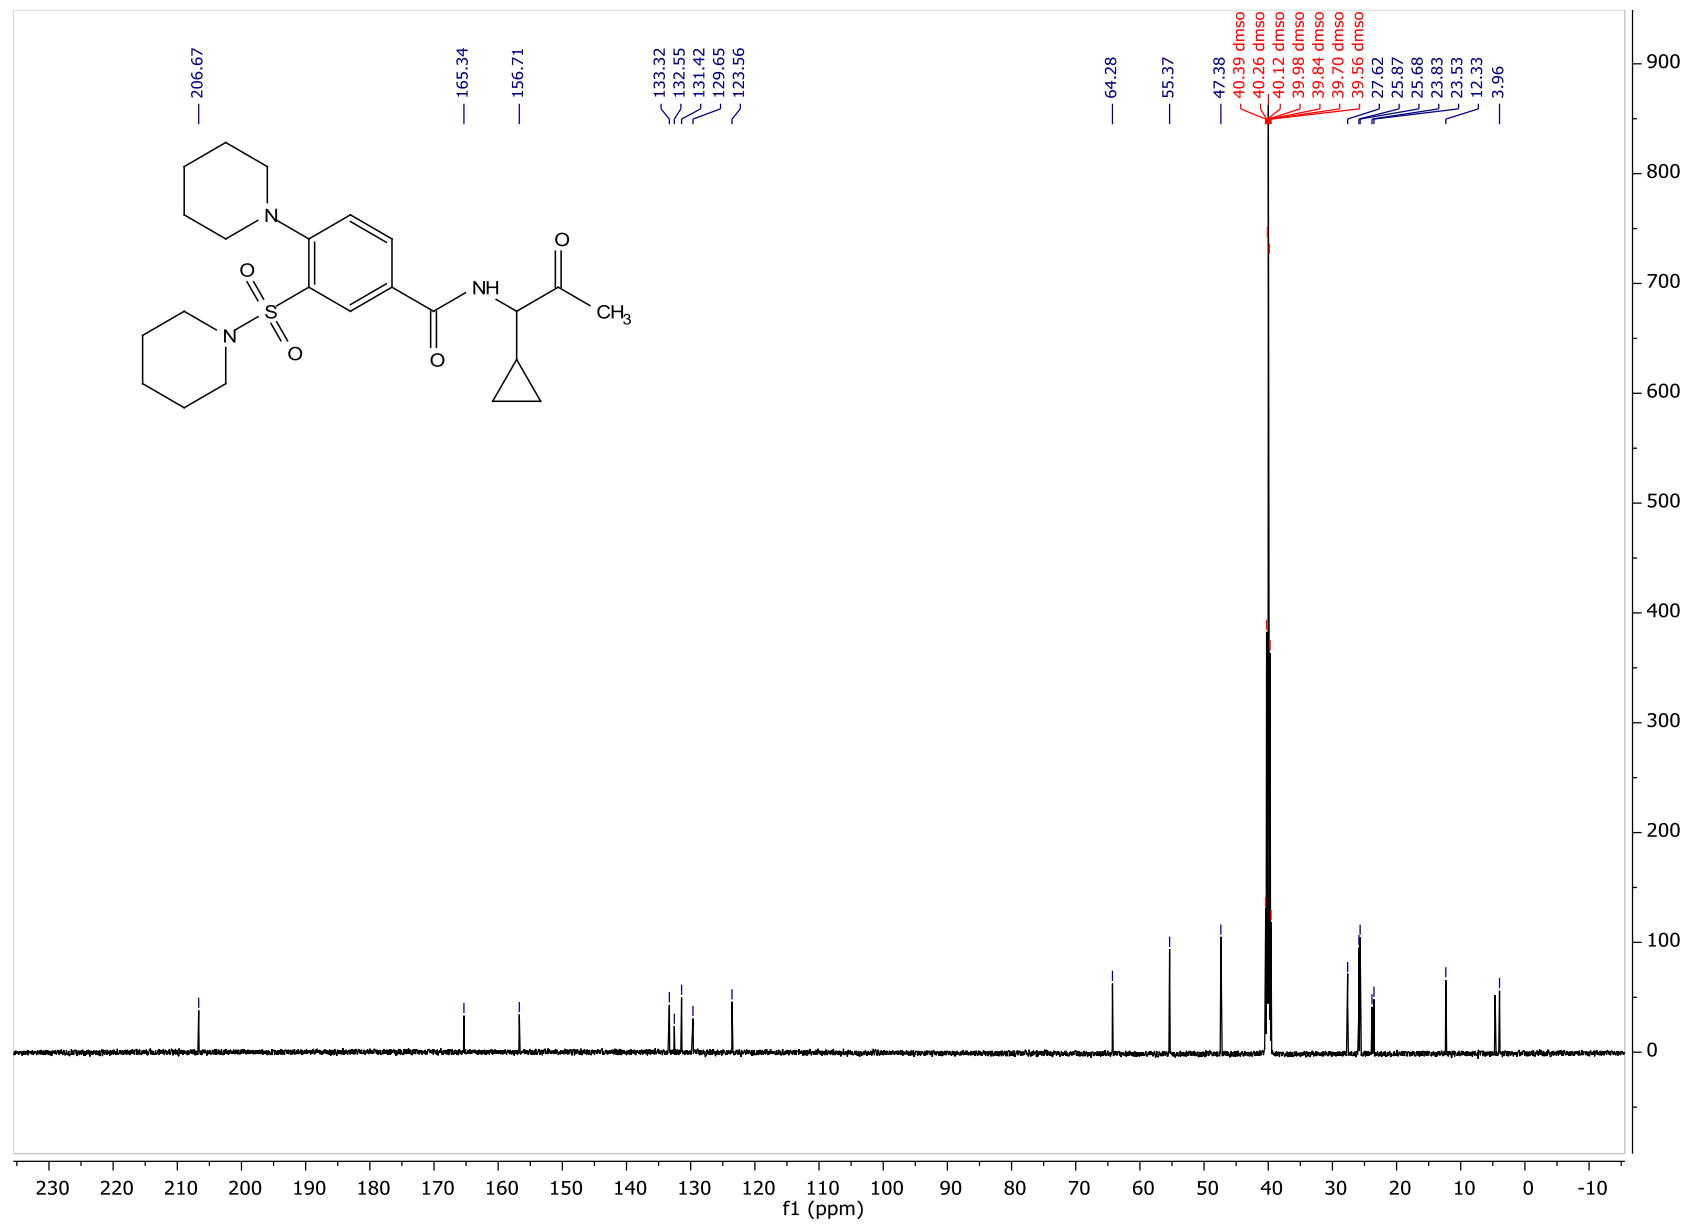

LC/MS spectrum of Z4886818395

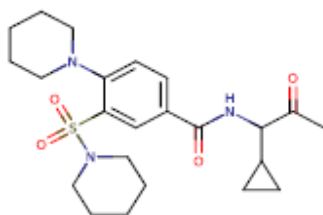

Mol Wt 447.59  
Exact Mass 447.26

| # | Time  | Area%  |
|---|-------|--------|
| 1 | 1.529 | 100.00 |

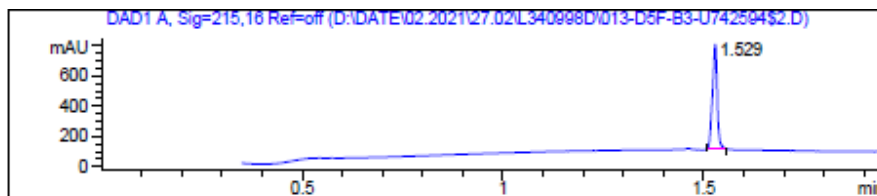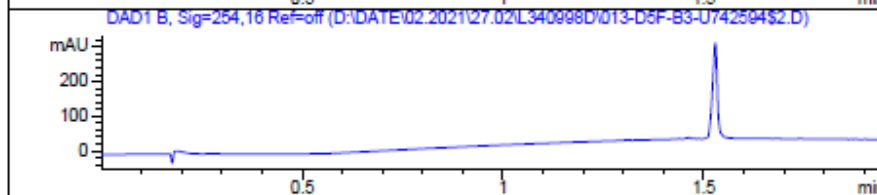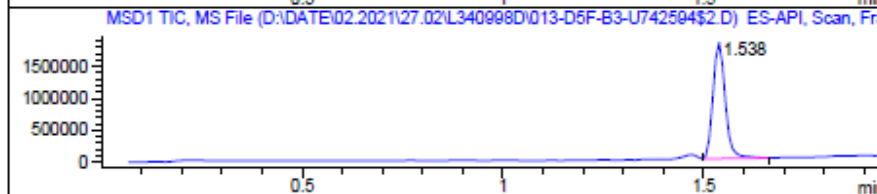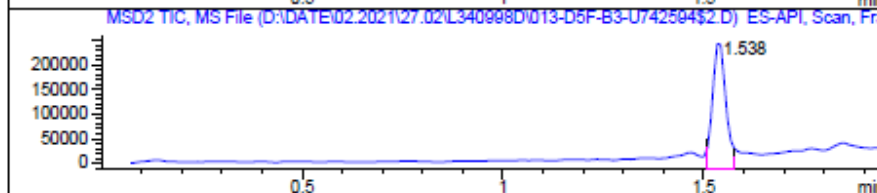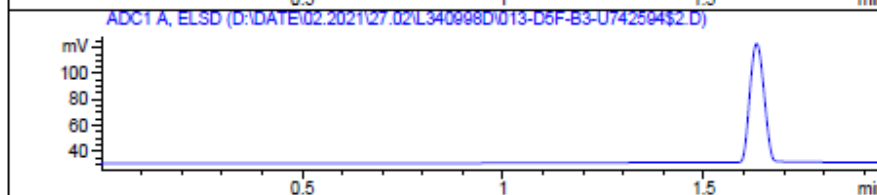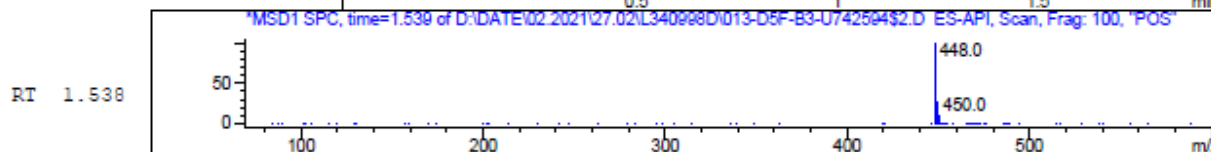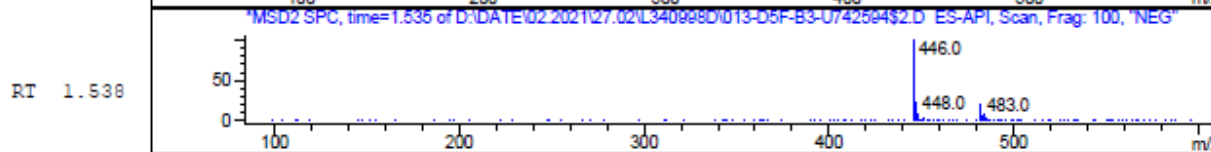

<sup>1</sup>H NMR spectrum of Z4886818400

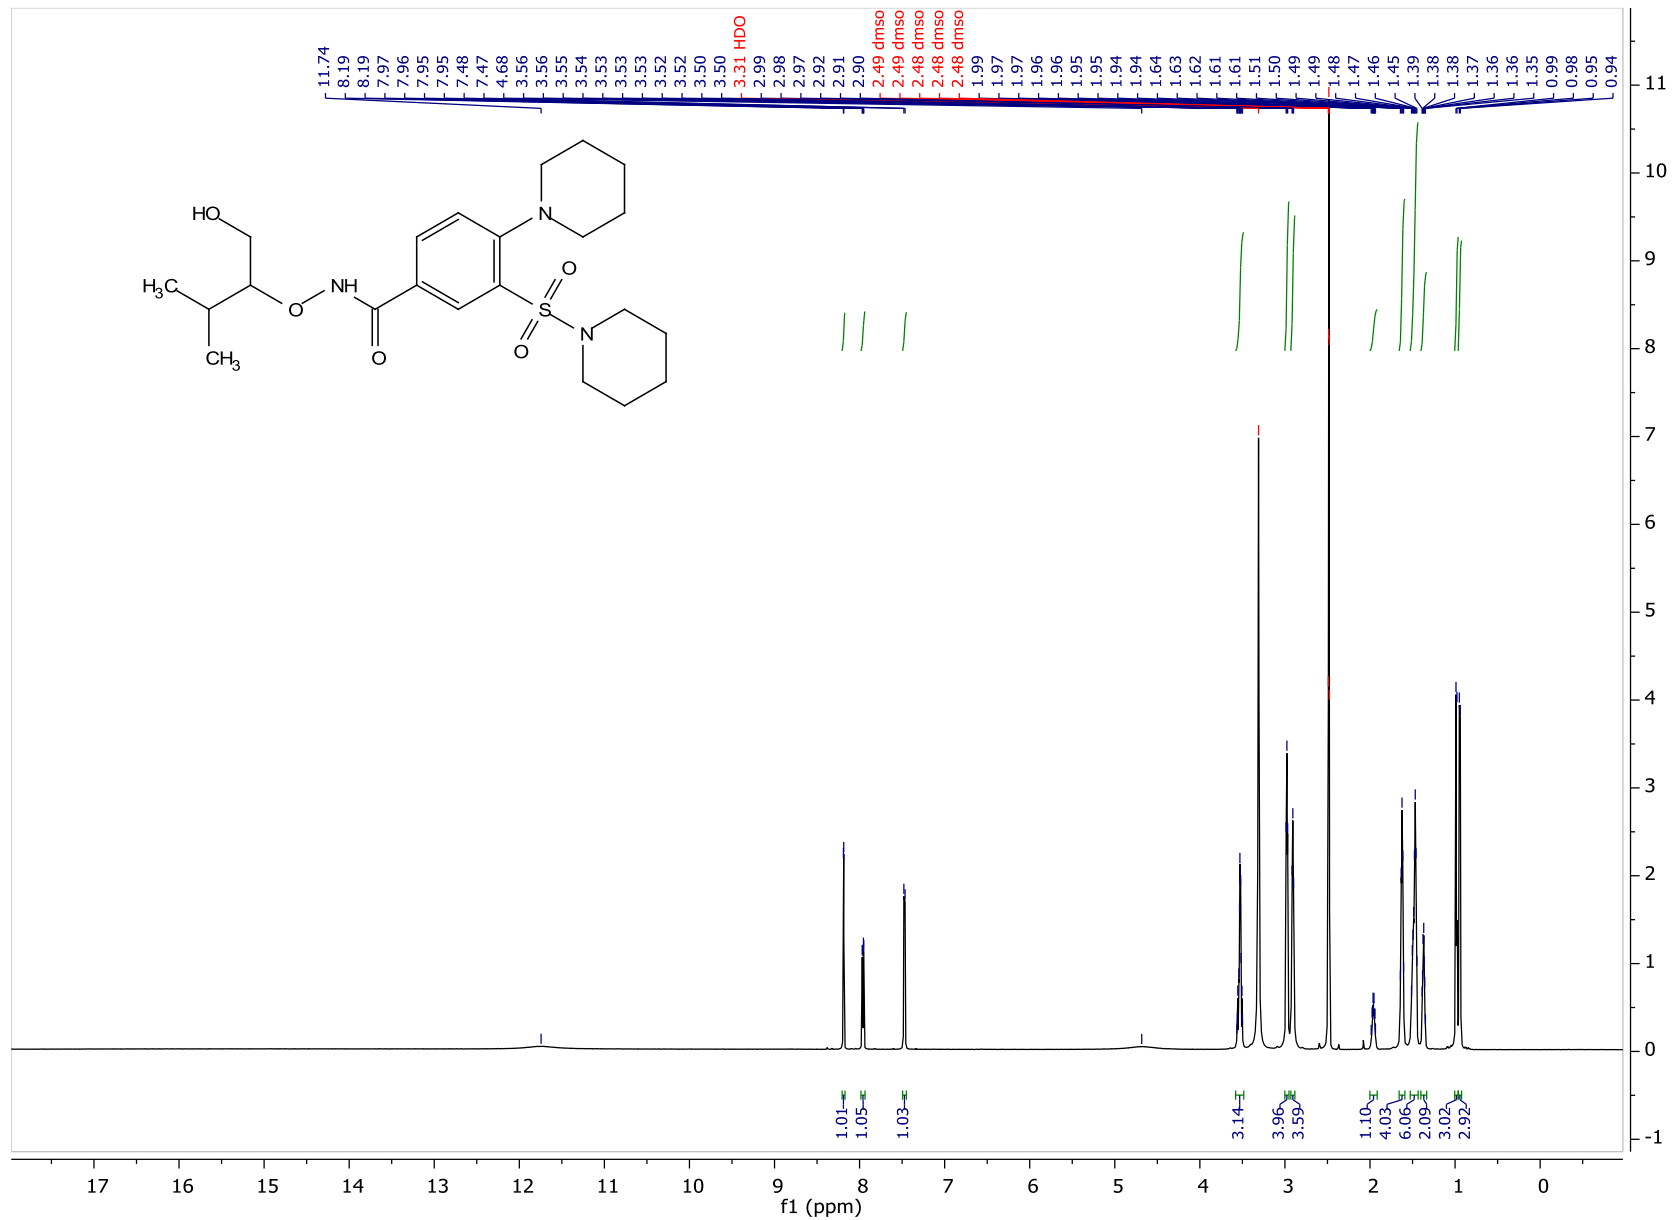

<sup>13</sup>C NMR spectrum of Z4886818400

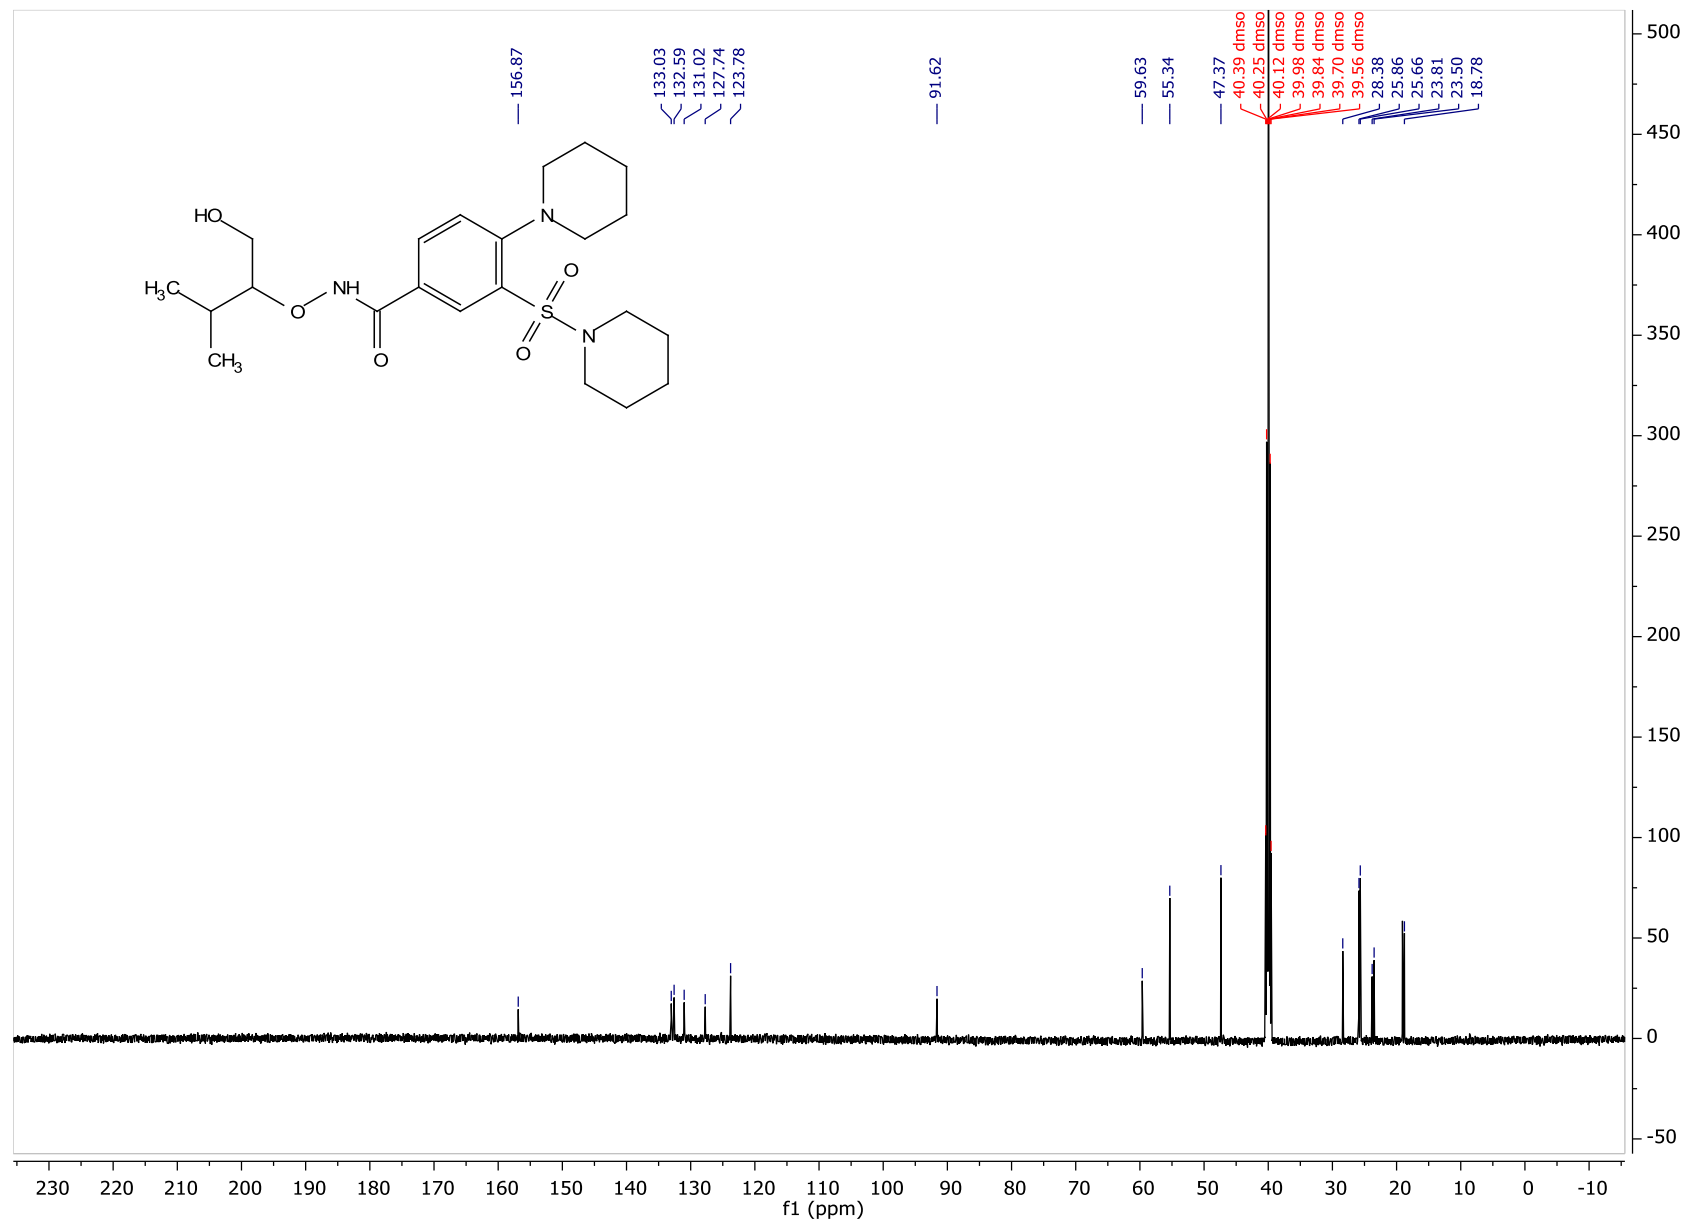

LC/MS spectrum of Z4886818400

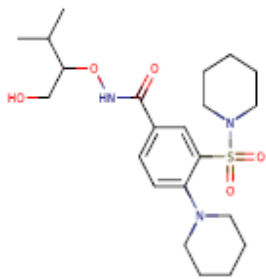

Mol Wt 453.6  
 Exact Mass 453.27

| # | Time  | Area%  |
|---|-------|--------|
| 1 | 1.452 | 100.00 |

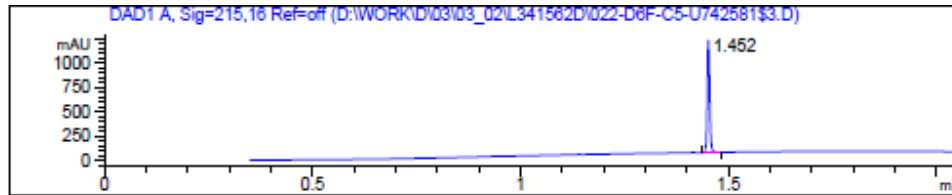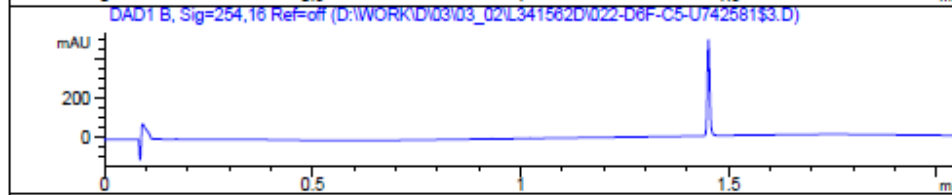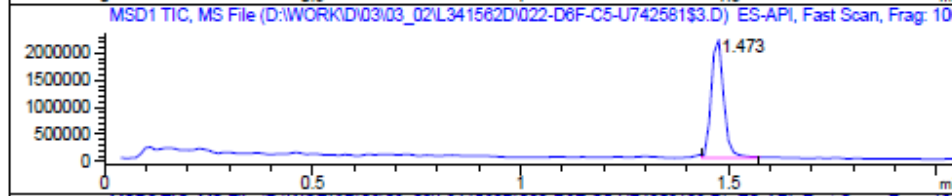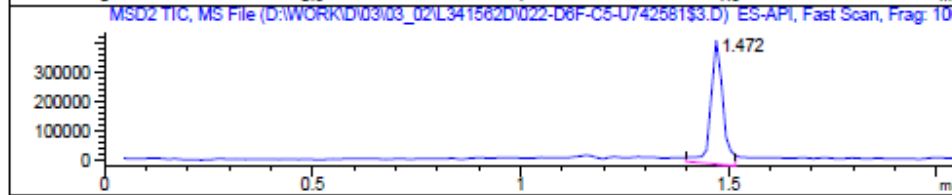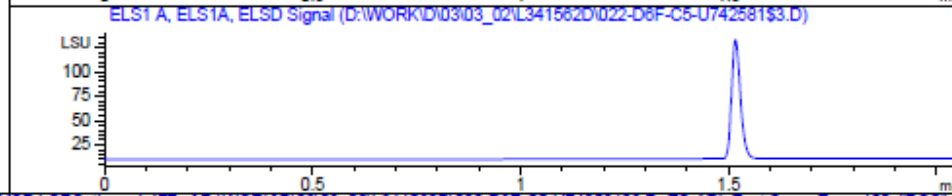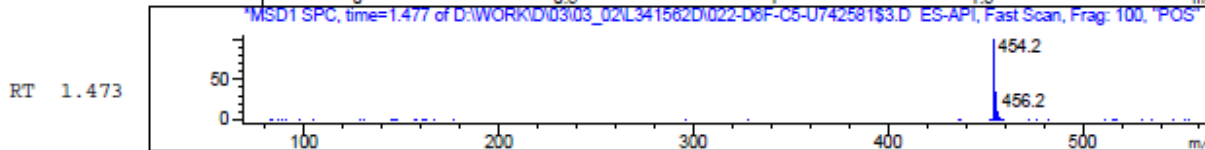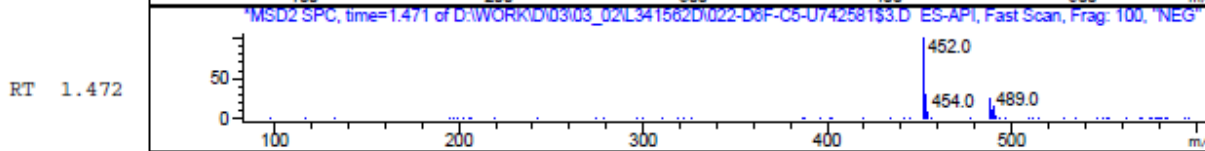

<sup>1</sup>H NMR spectrum of Z4886818402

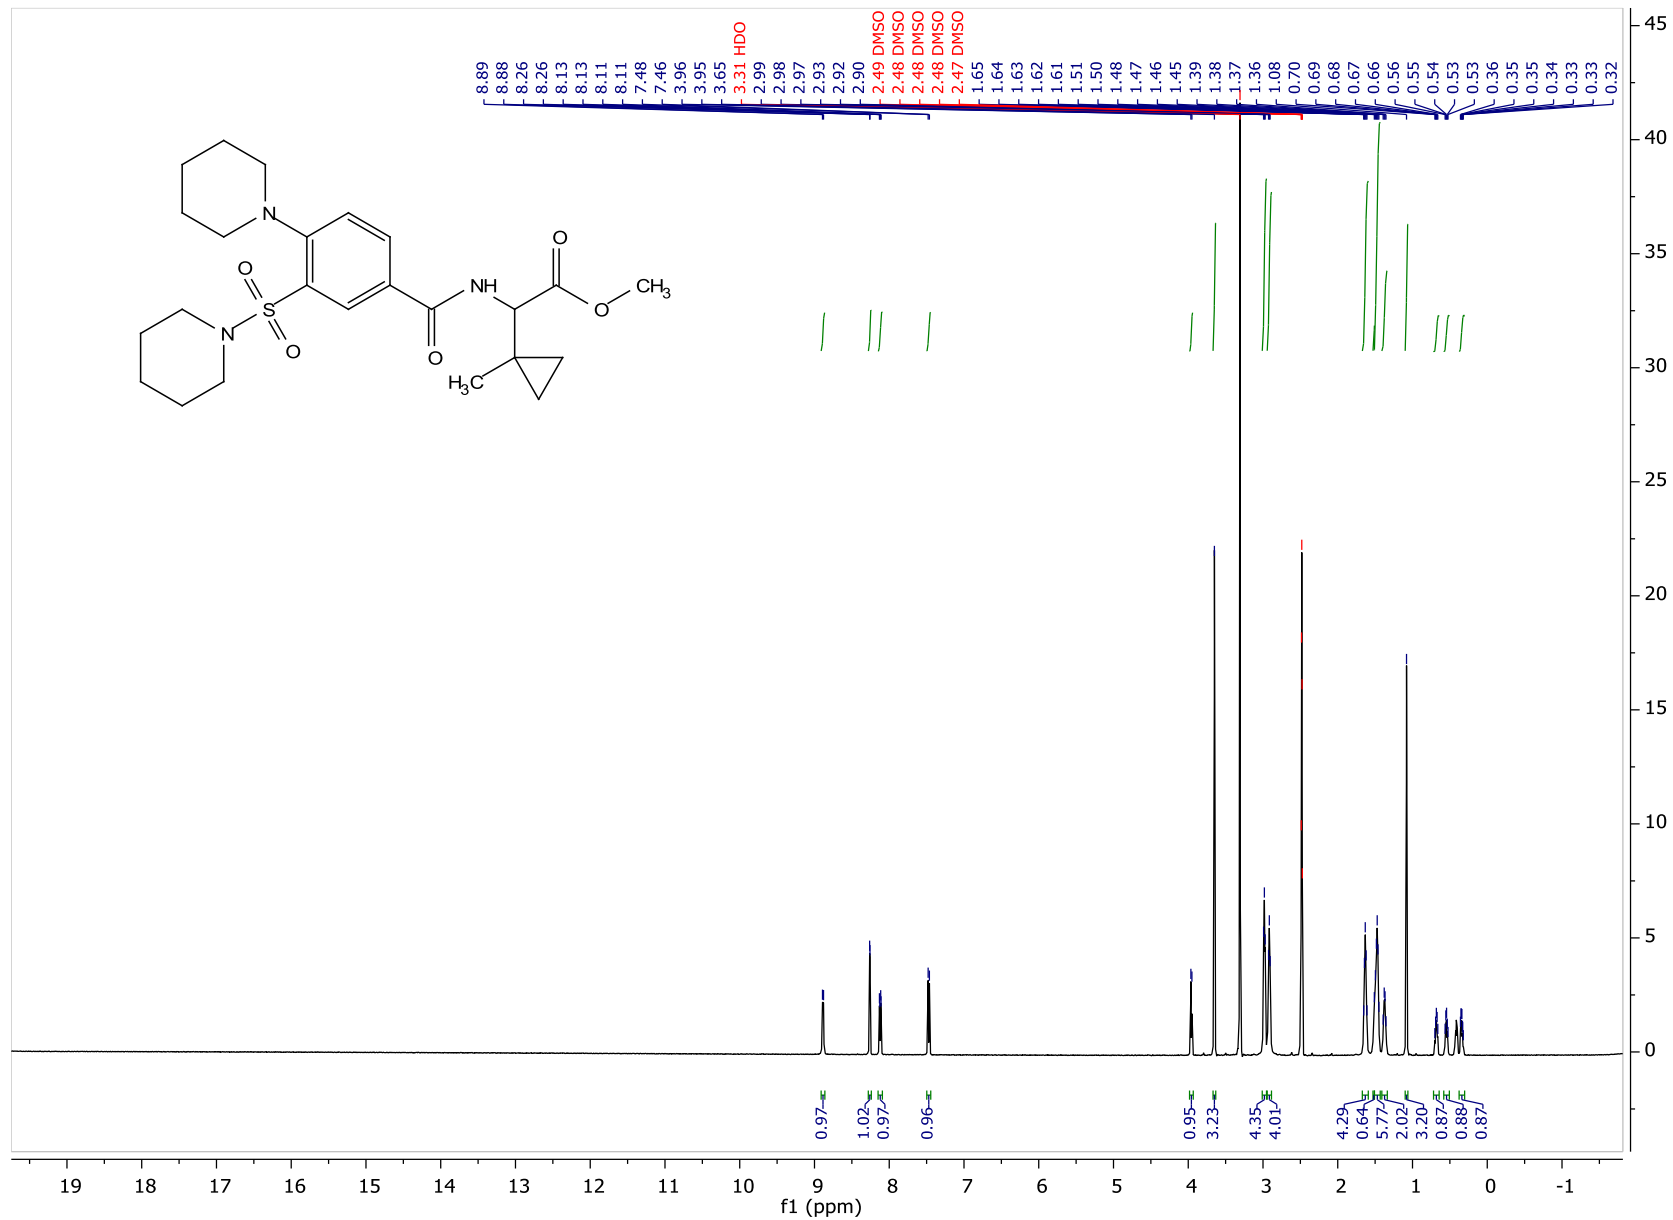



<sup>13</sup>C NMR spectrum of Z4886818402

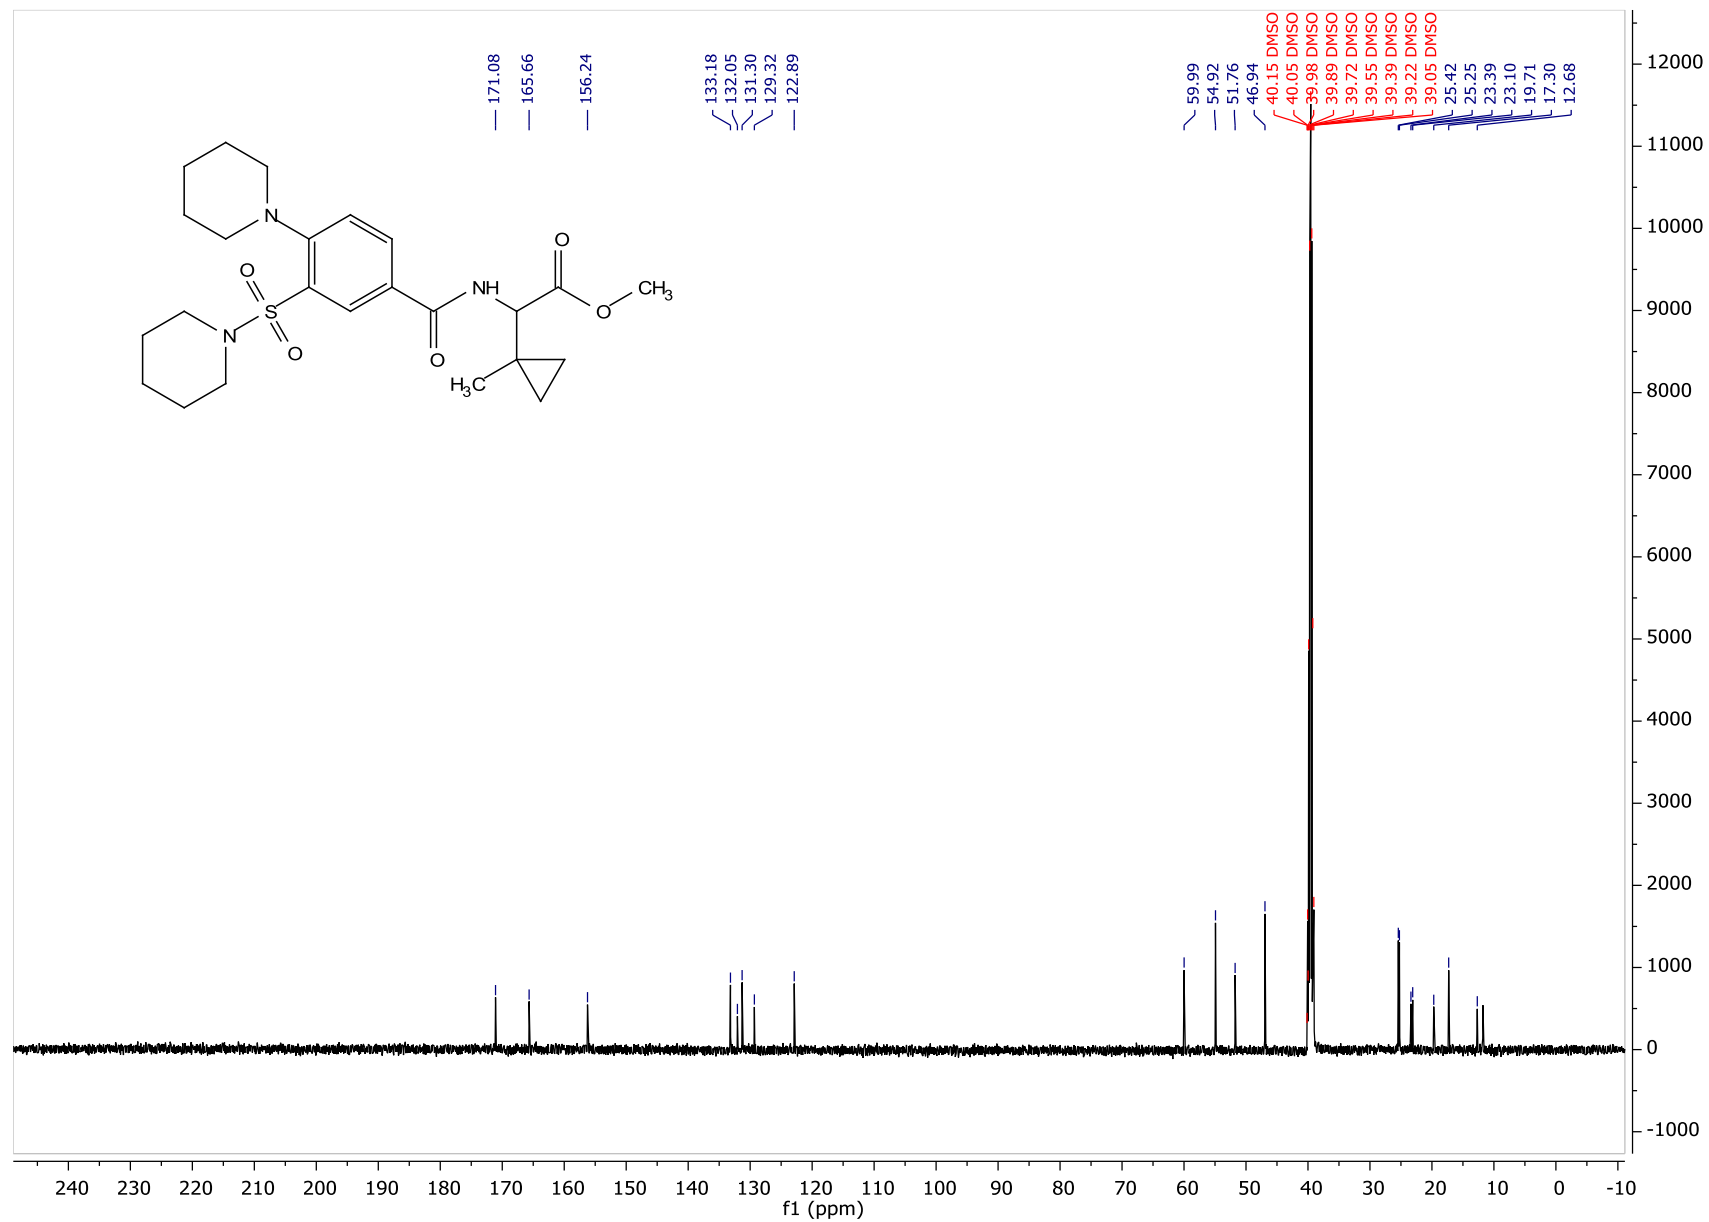

LC/MS spectrum of Z4886818402

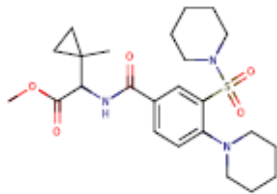

Mol Wt 477.62  
 Exact Mass 477.27

| # | Time  | Area% |
|---|-------|-------|
| 1 | 1.577 | 94.19 |
| 2 | 1.608 | 5.81  |

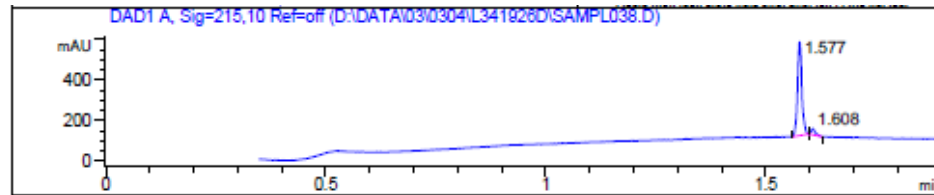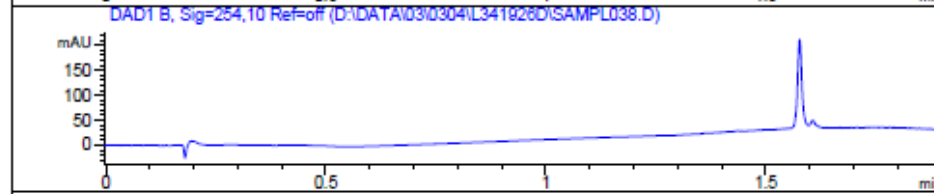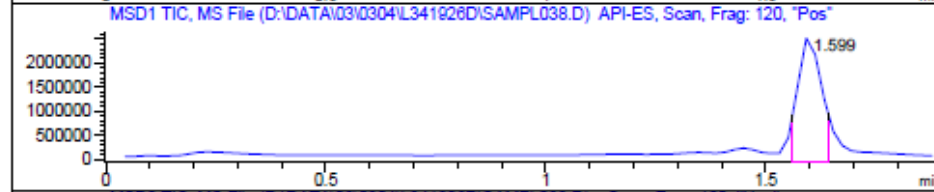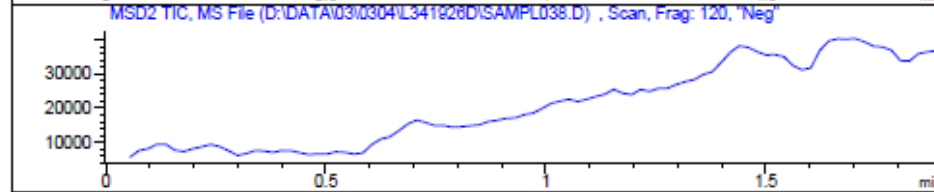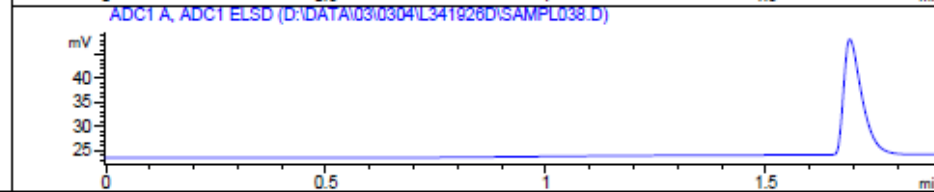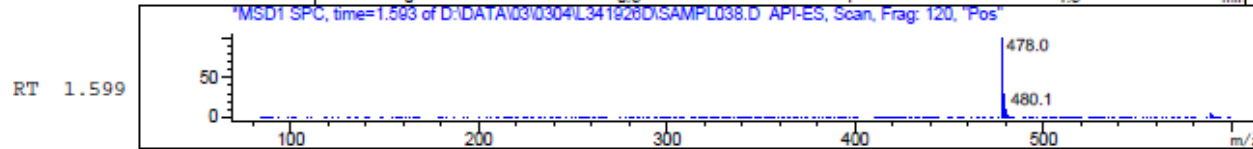

<sup>1</sup>H NMR spectrum of Z4886818404

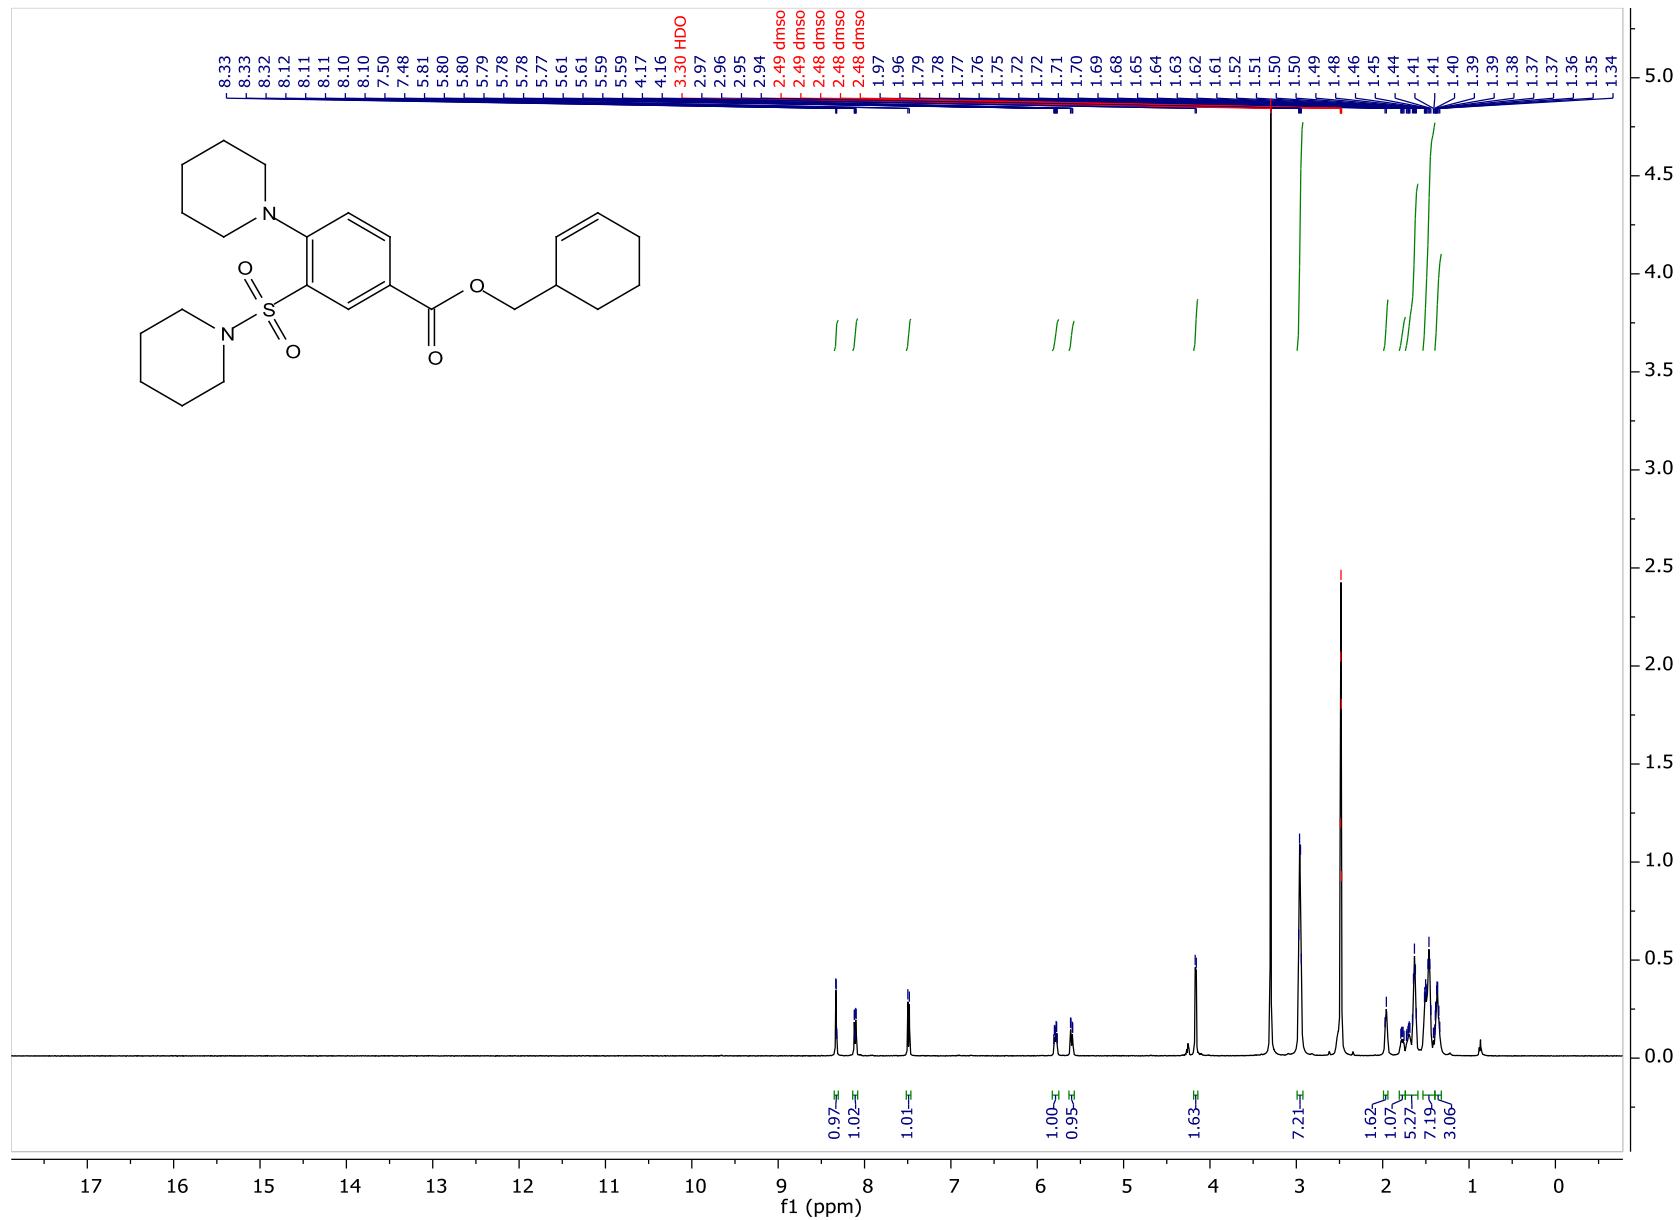

LC/MS spectrum of Z4886818404

Ret\_Time: 5.222 min

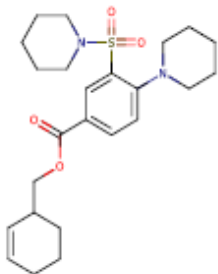

Mol Wt 446.6  
Exact Mass 446.27

| # | Time  | Area% |
|---|-------|-------|
| 1 | 5.175 | 9.68  |
| 2 | 5.222 | 90.32 |

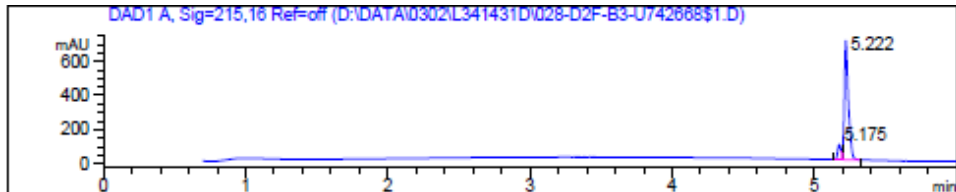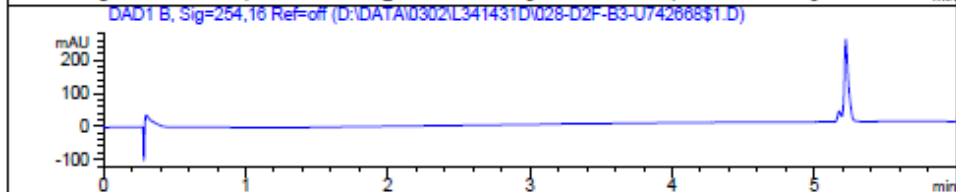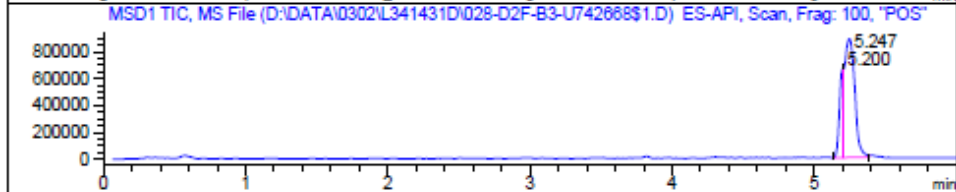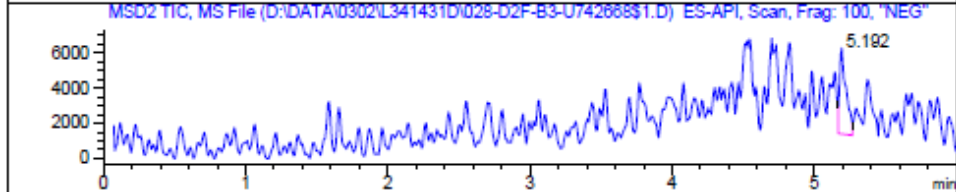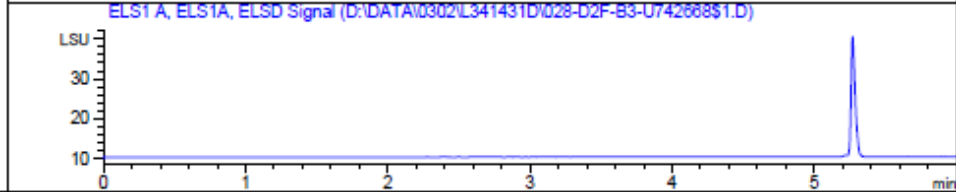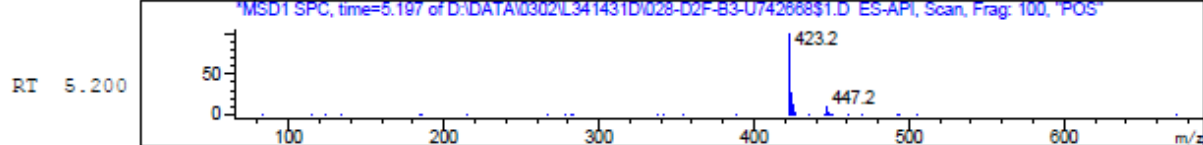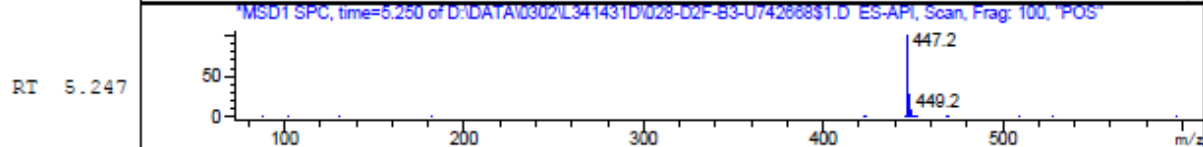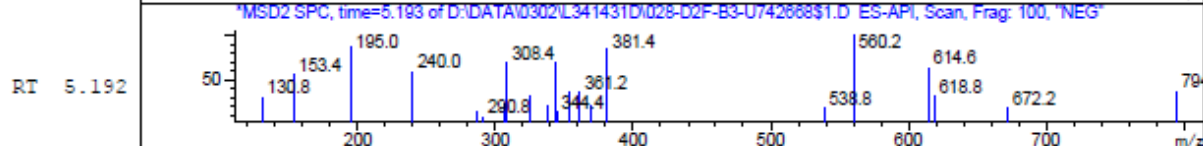

<sup>1</sup>H NMR spectrum of Z4886818412

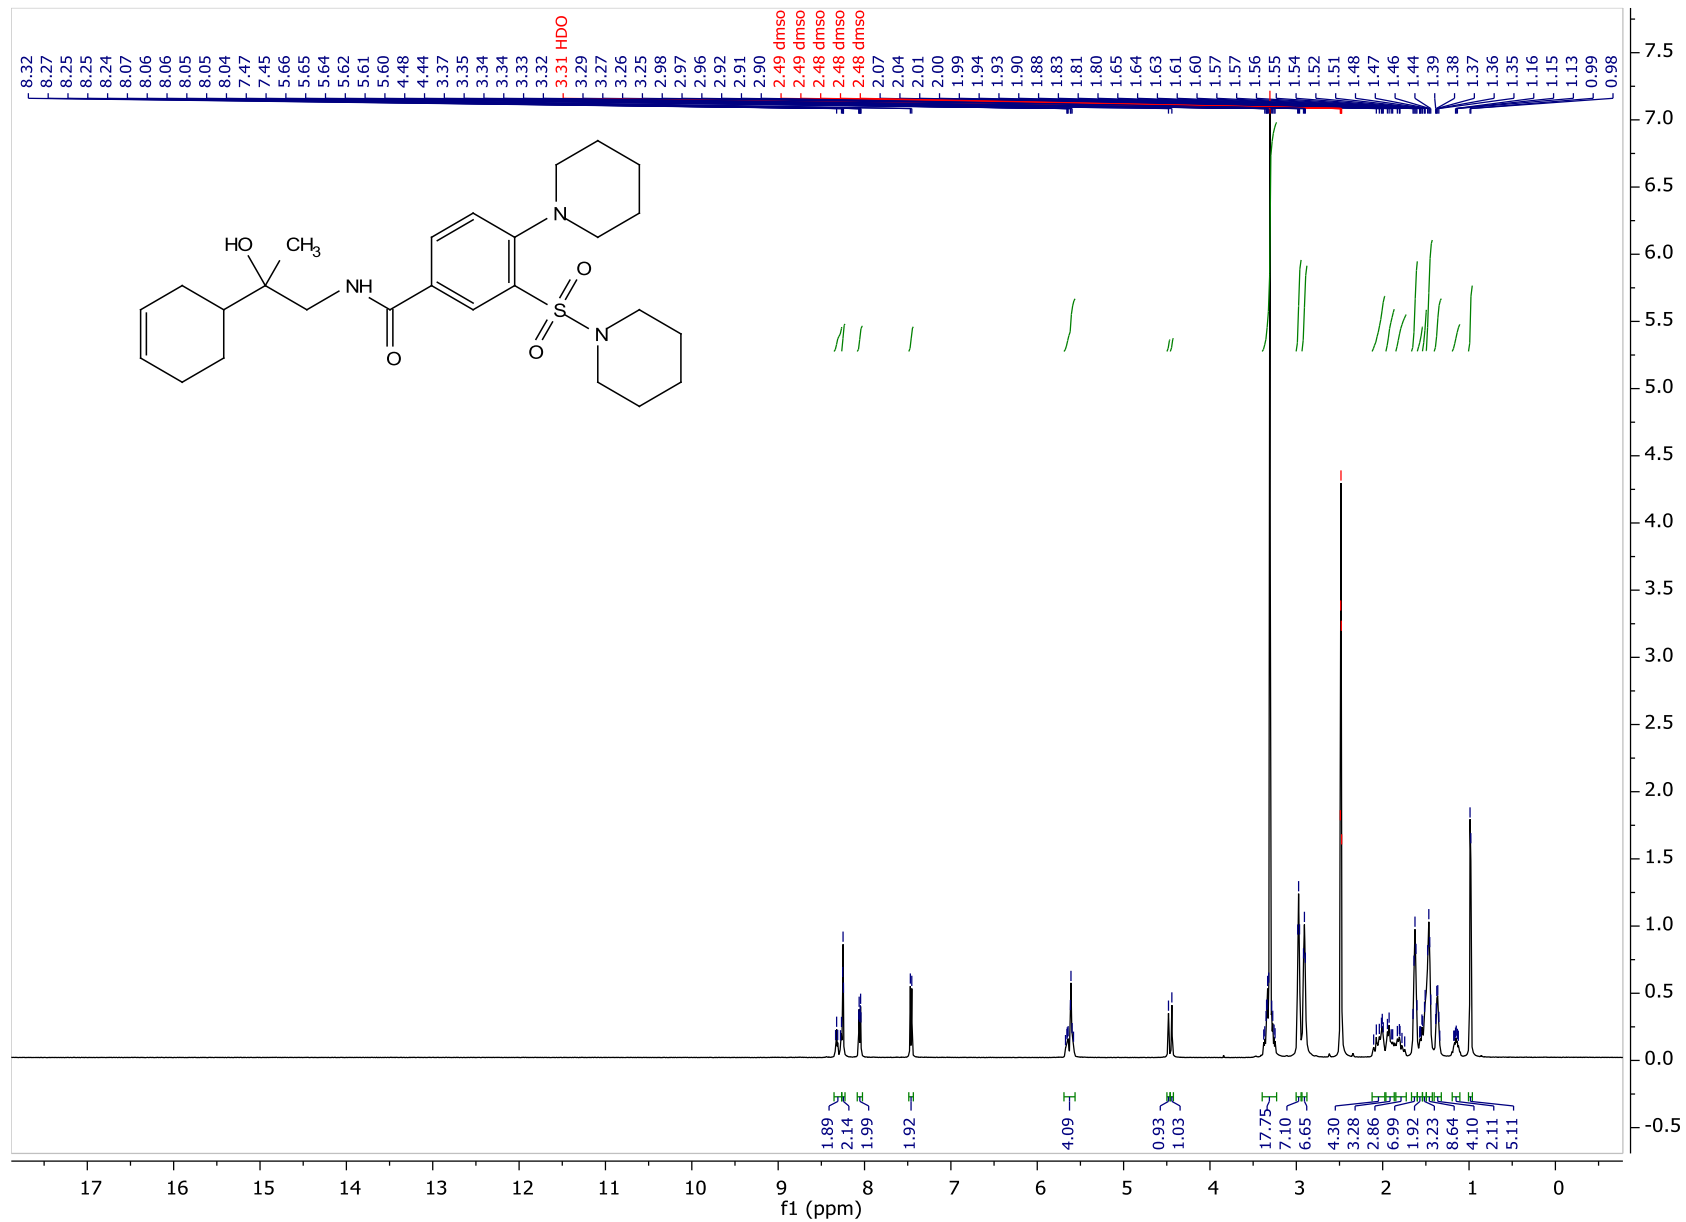

<sup>13</sup>C NMR spectrum of Z4886818412

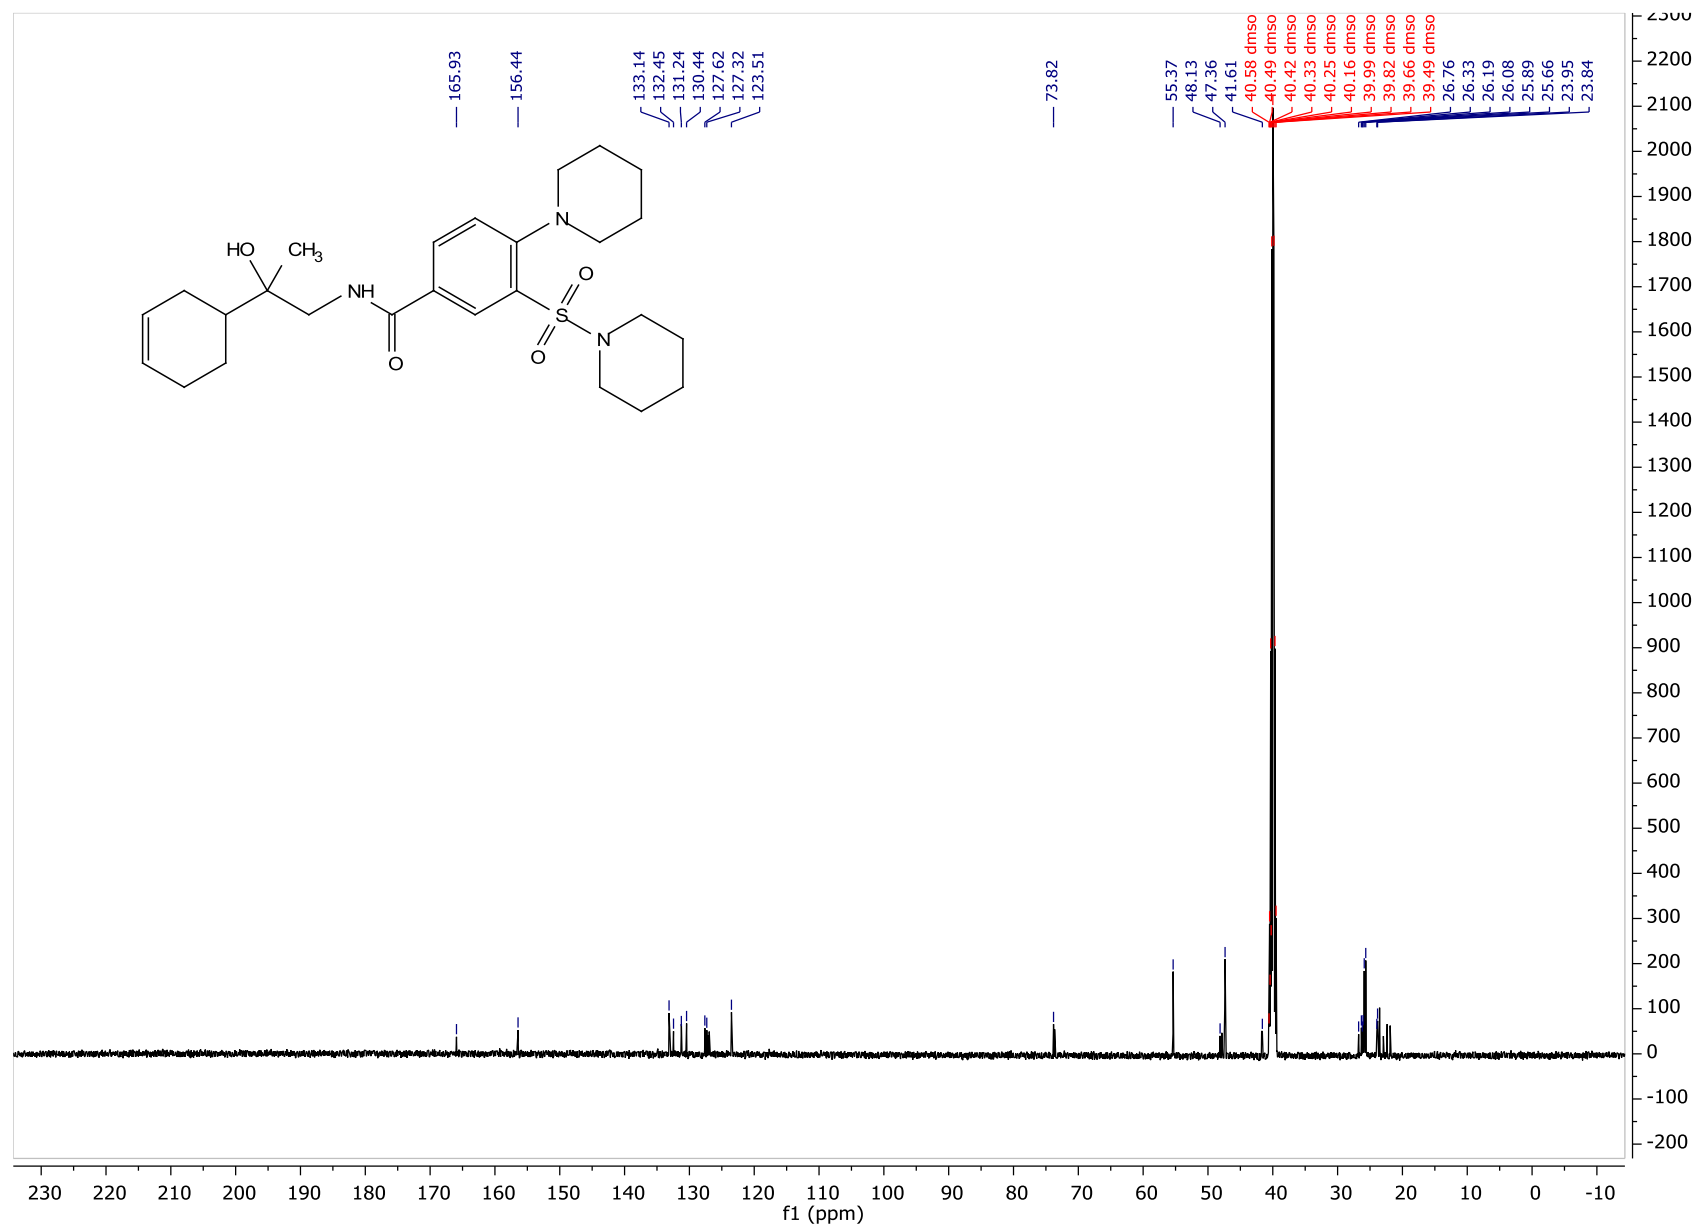

LC/MS spectrum of Z4886818412

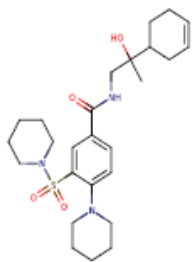

Mol Wt 489.67  
Exact Mass 489.32

| # | Time  | Area% |
|---|-------|-------|
| 1 | 1.636 | 91.61 |
| 2 | 1.686 | 8.39  |

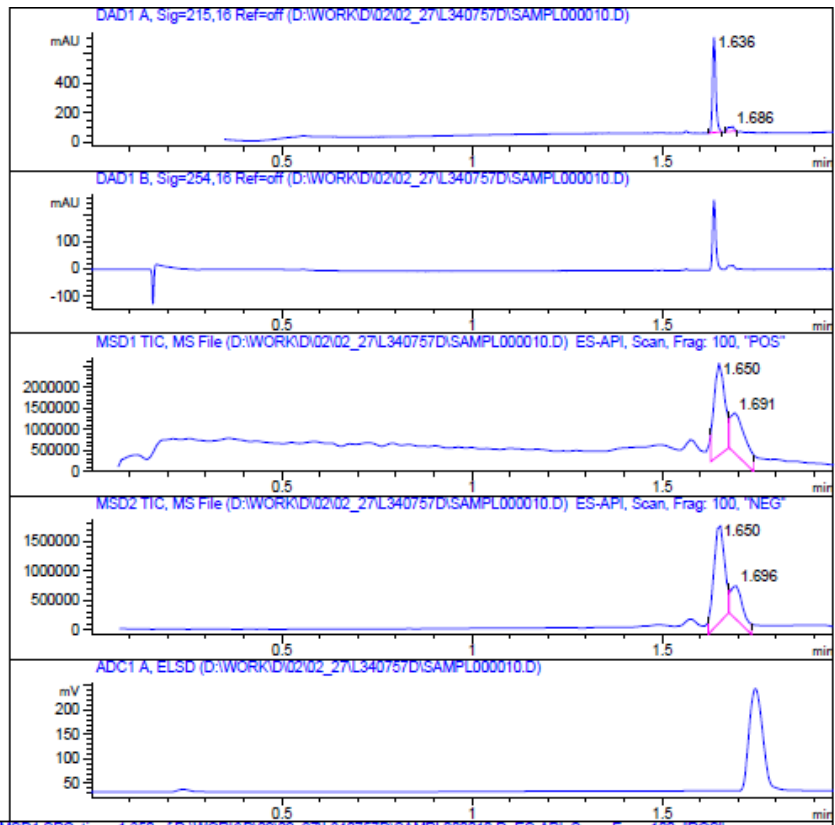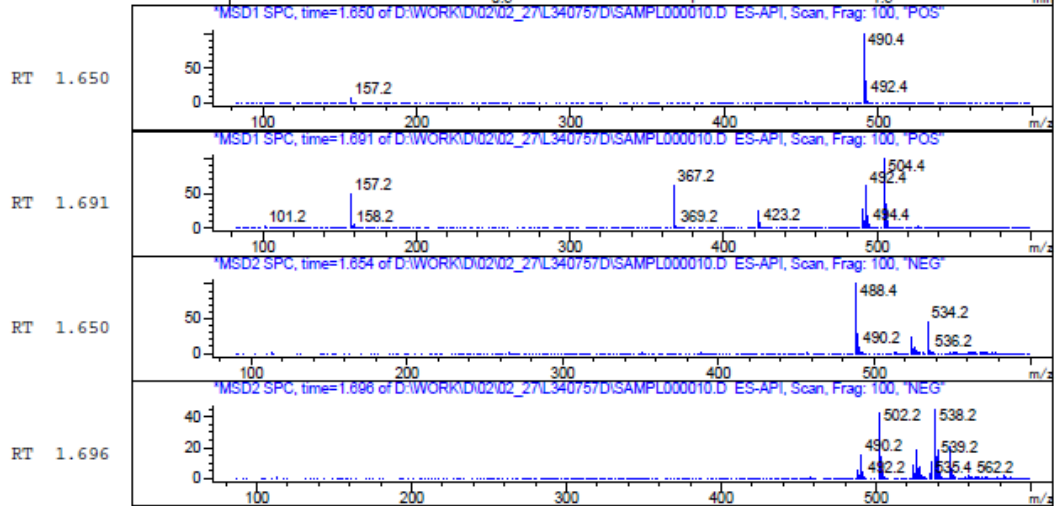

<sup>1</sup>H NMR spectrum of Z4886818414

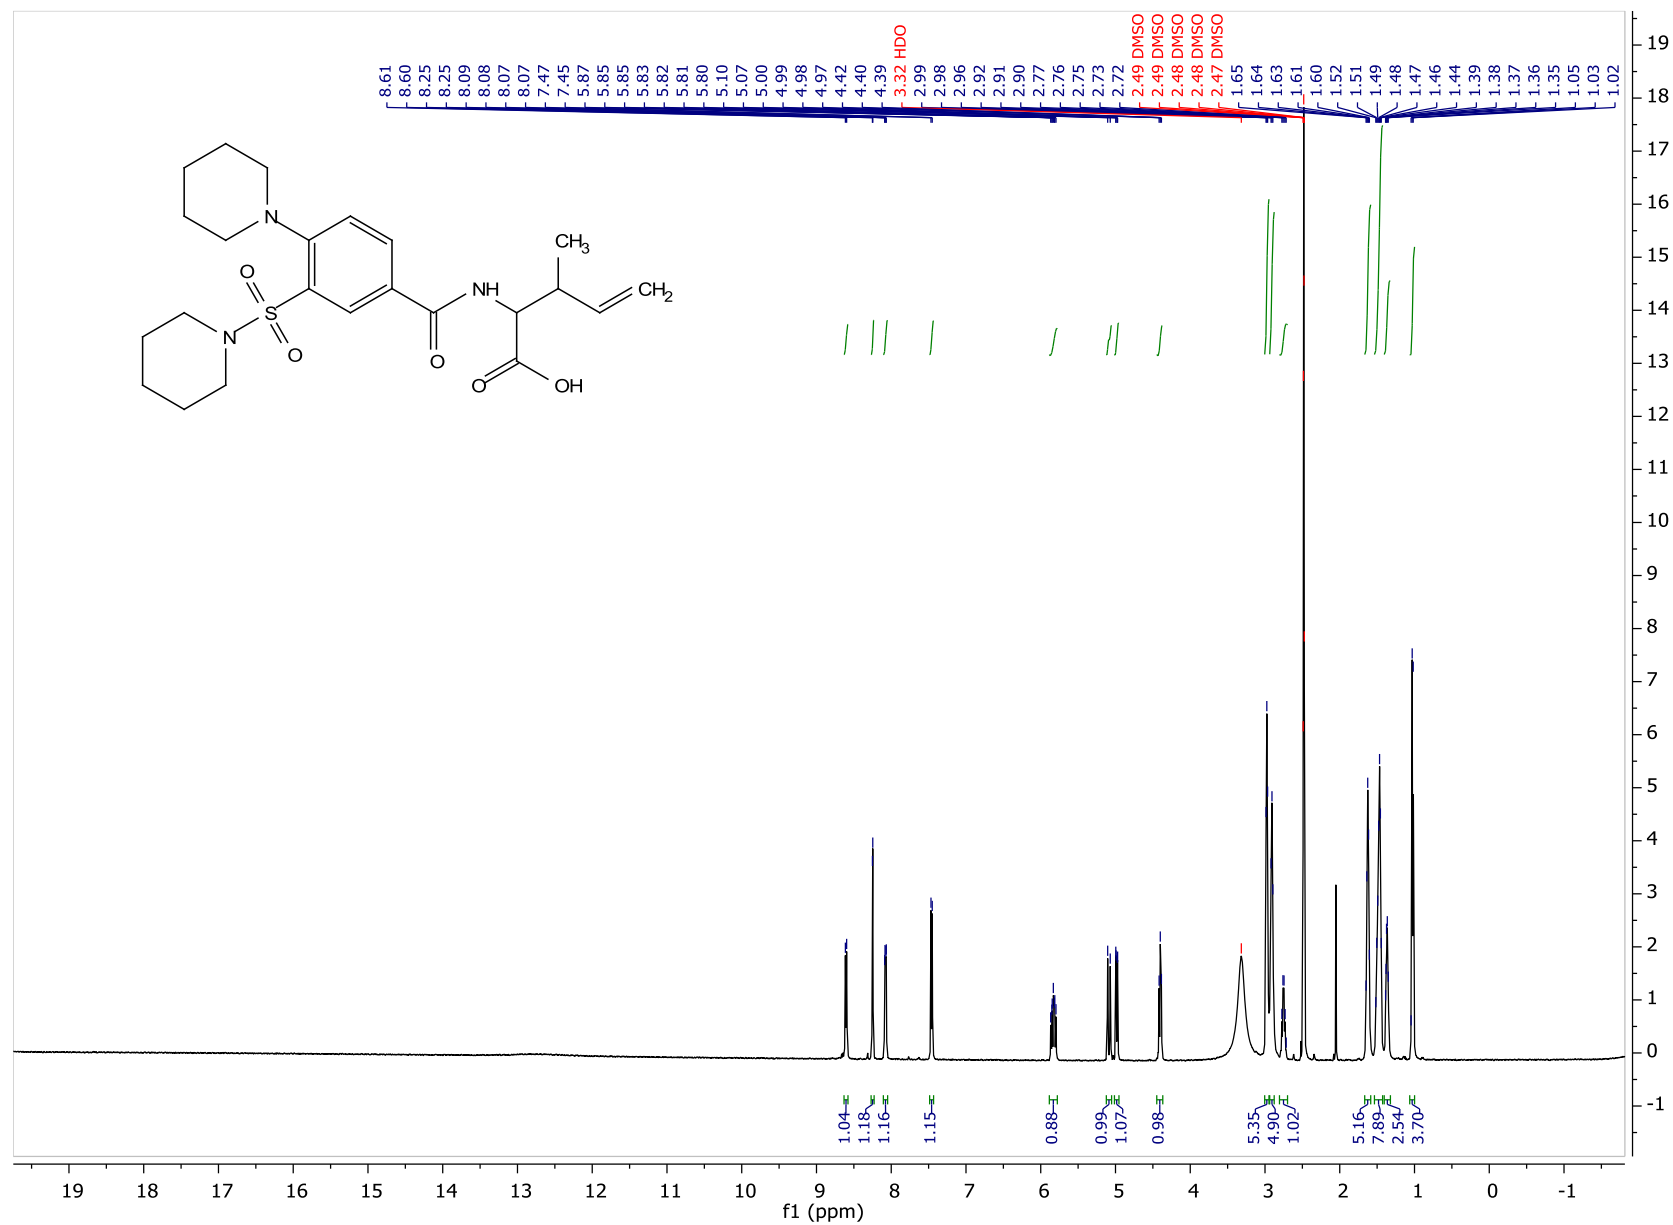



<sup>13</sup>C NMR spectrum of Z4886818414

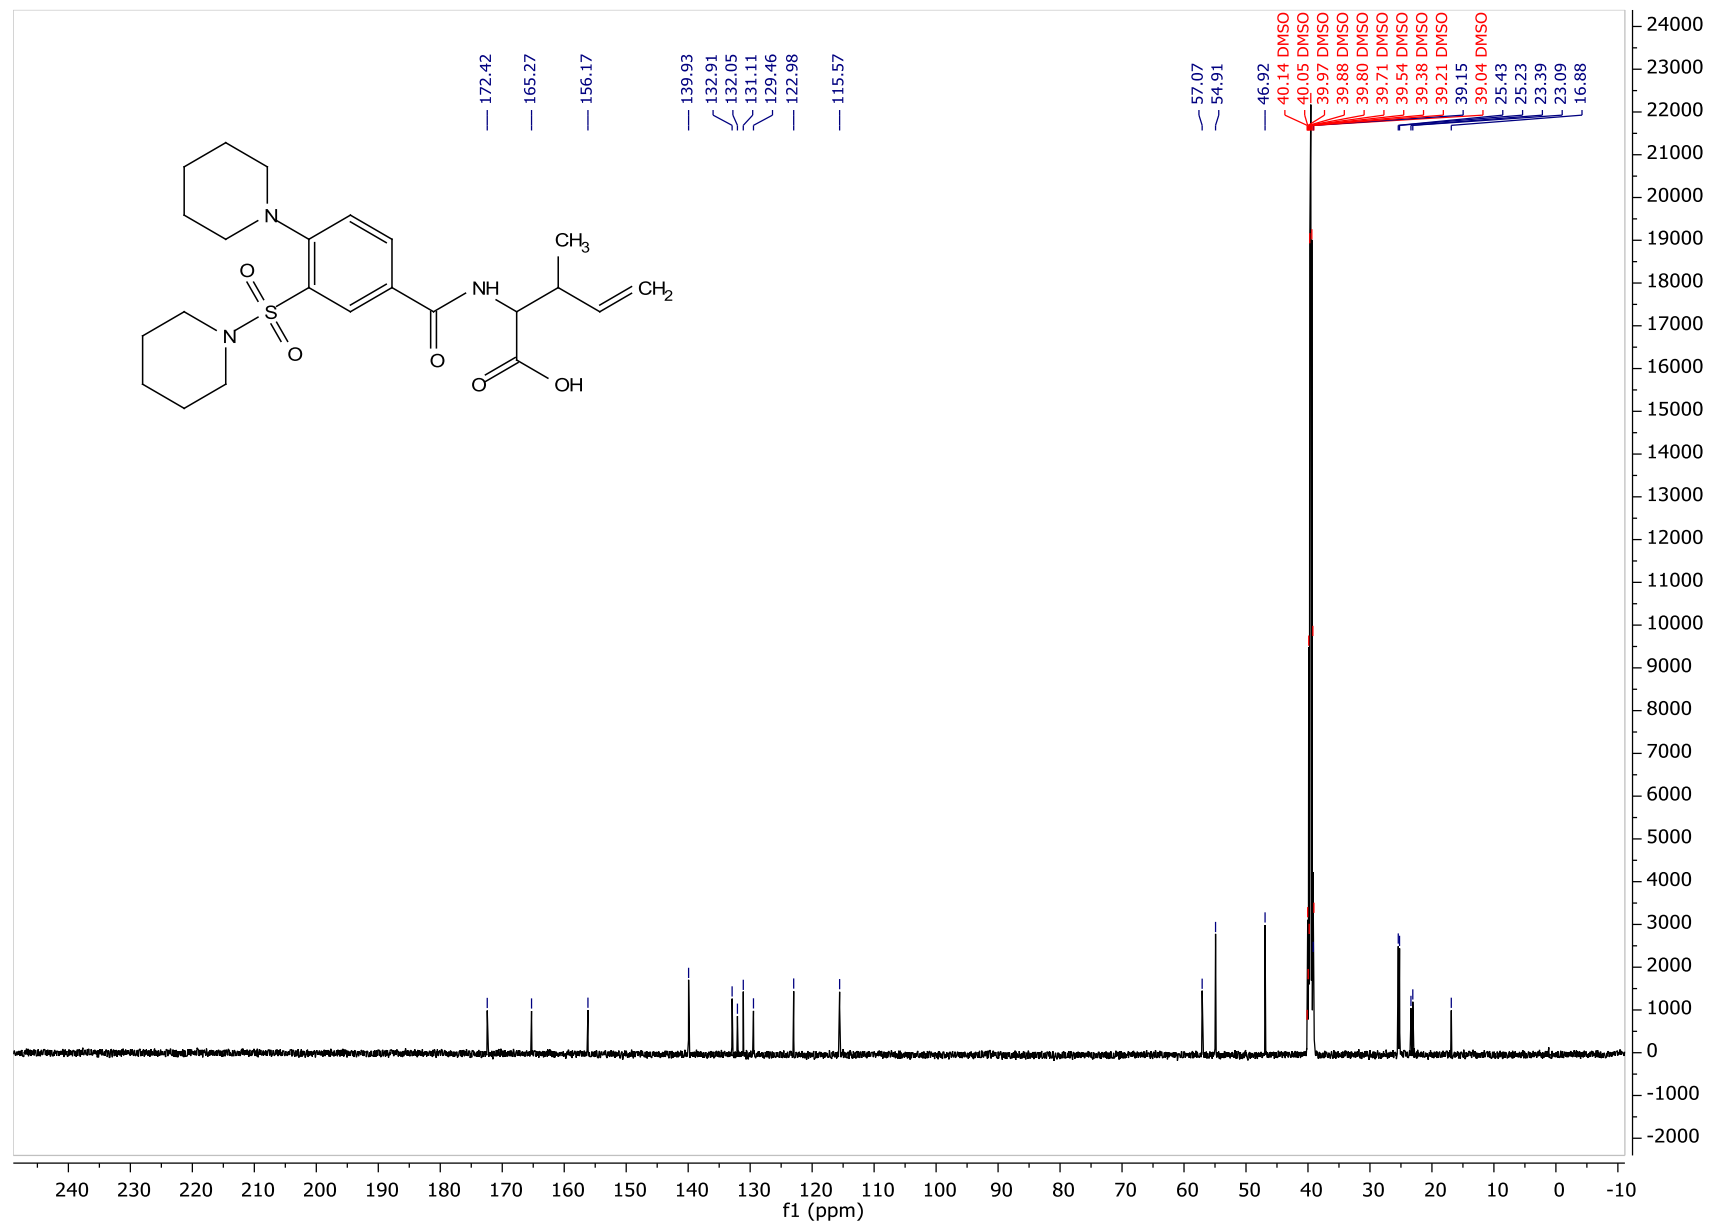

LC/MS spectrum of Z4886818414

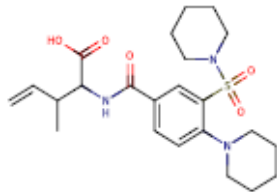

Mol Wt 463.59  
Exact Mass 463.25

| # | Time  | Area% |
|---|-------|-------|
| 1 | 1.367 | 3.29  |
| 2 | 1.416 | 96.71 |

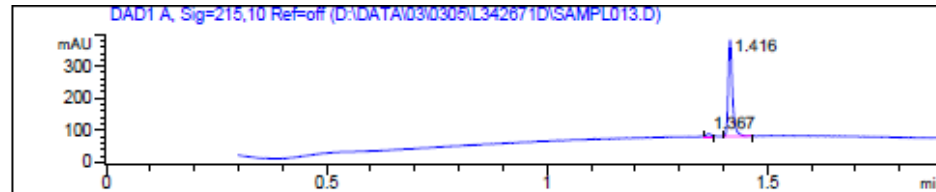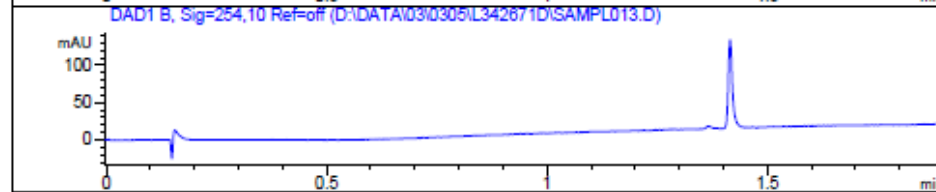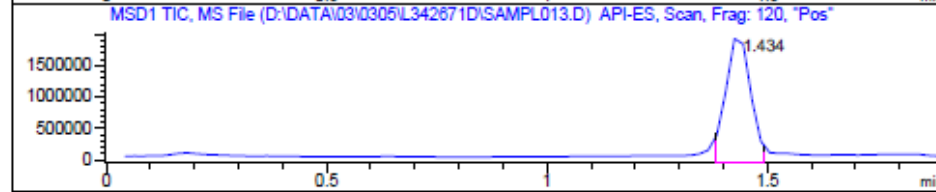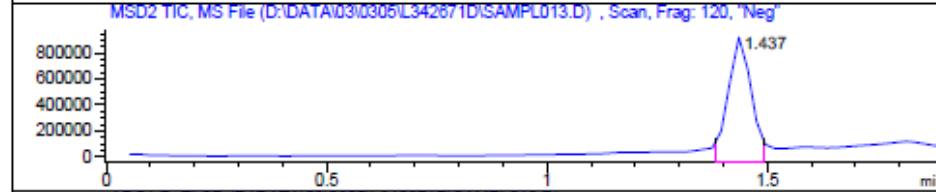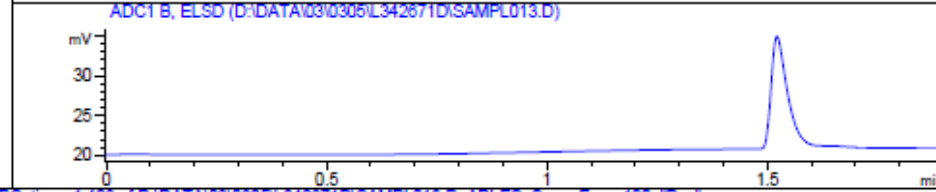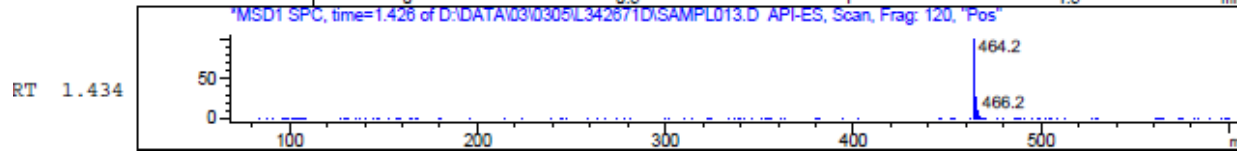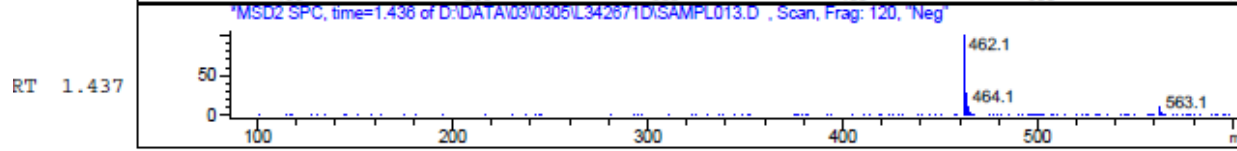

<sup>1</sup>H NMR spectrum of Z4886818415

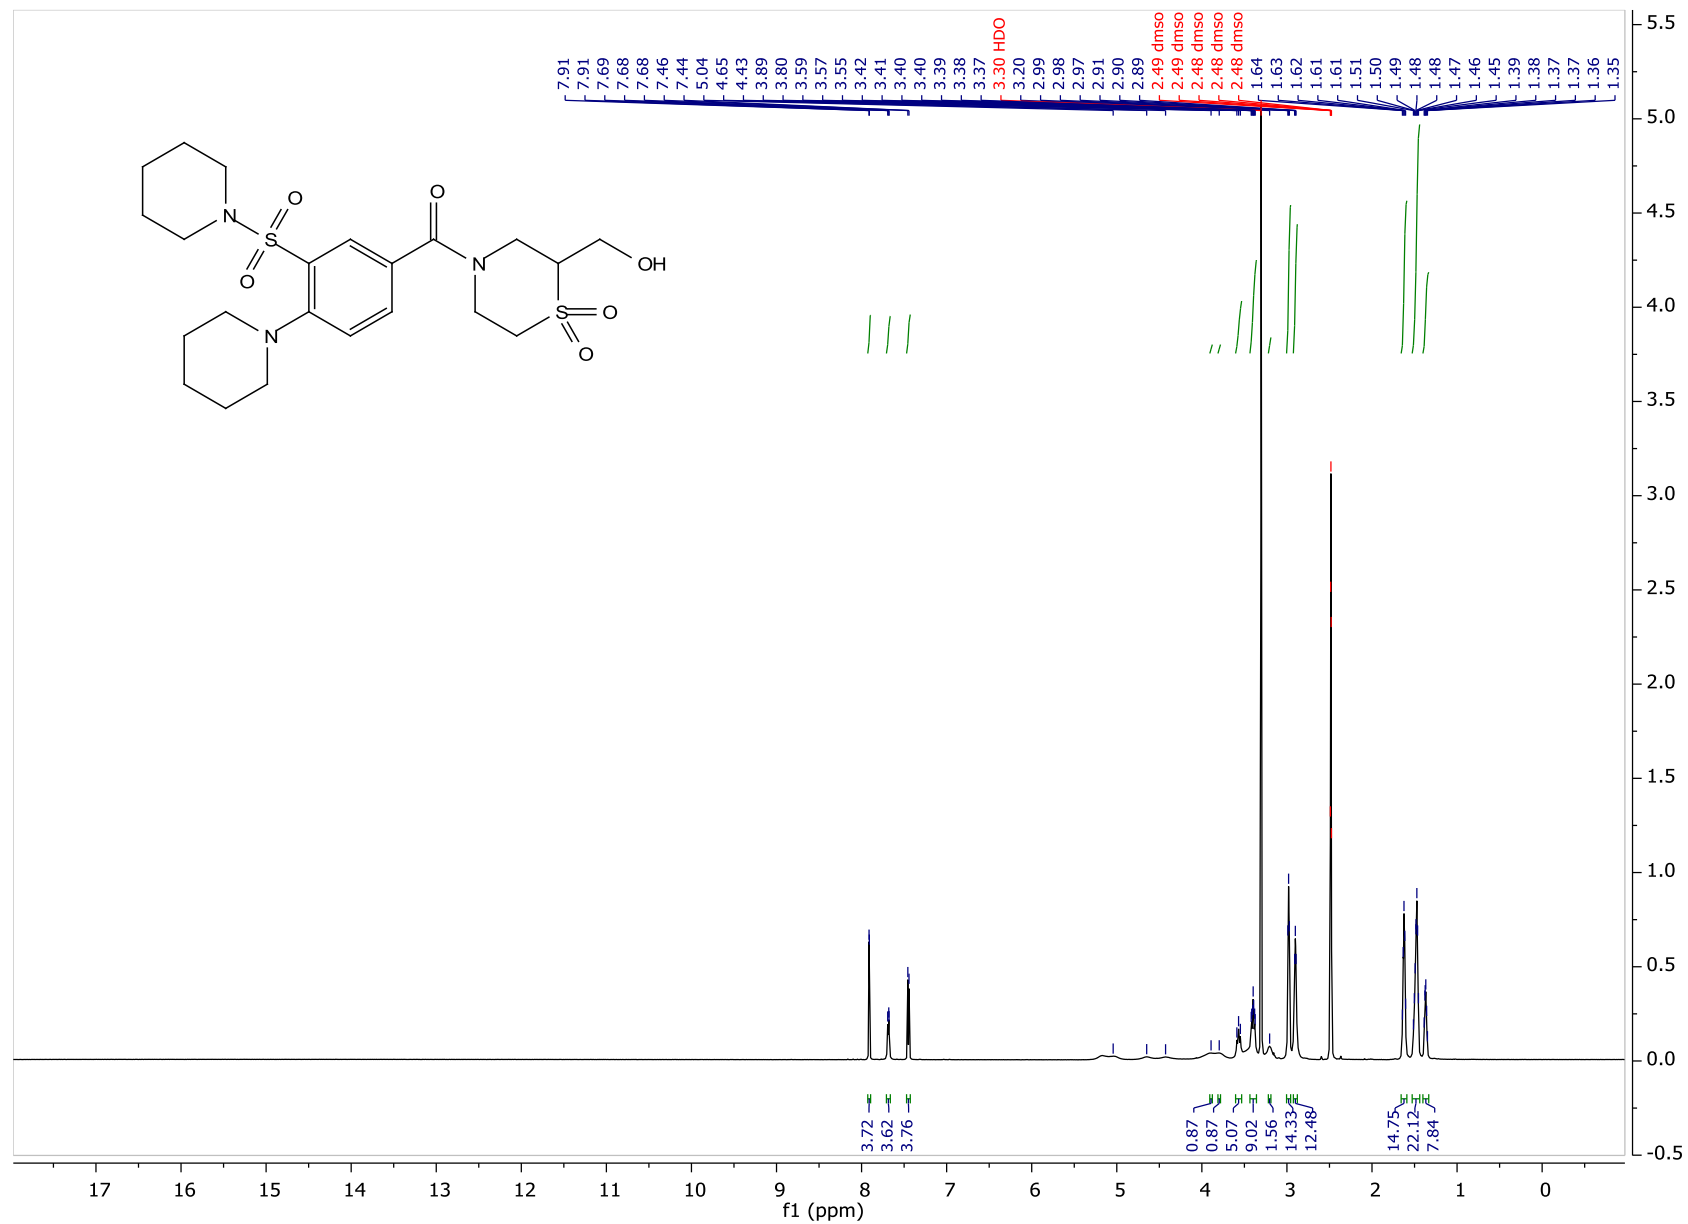

<sup>13</sup>C NMR spectrum of Z4886818415

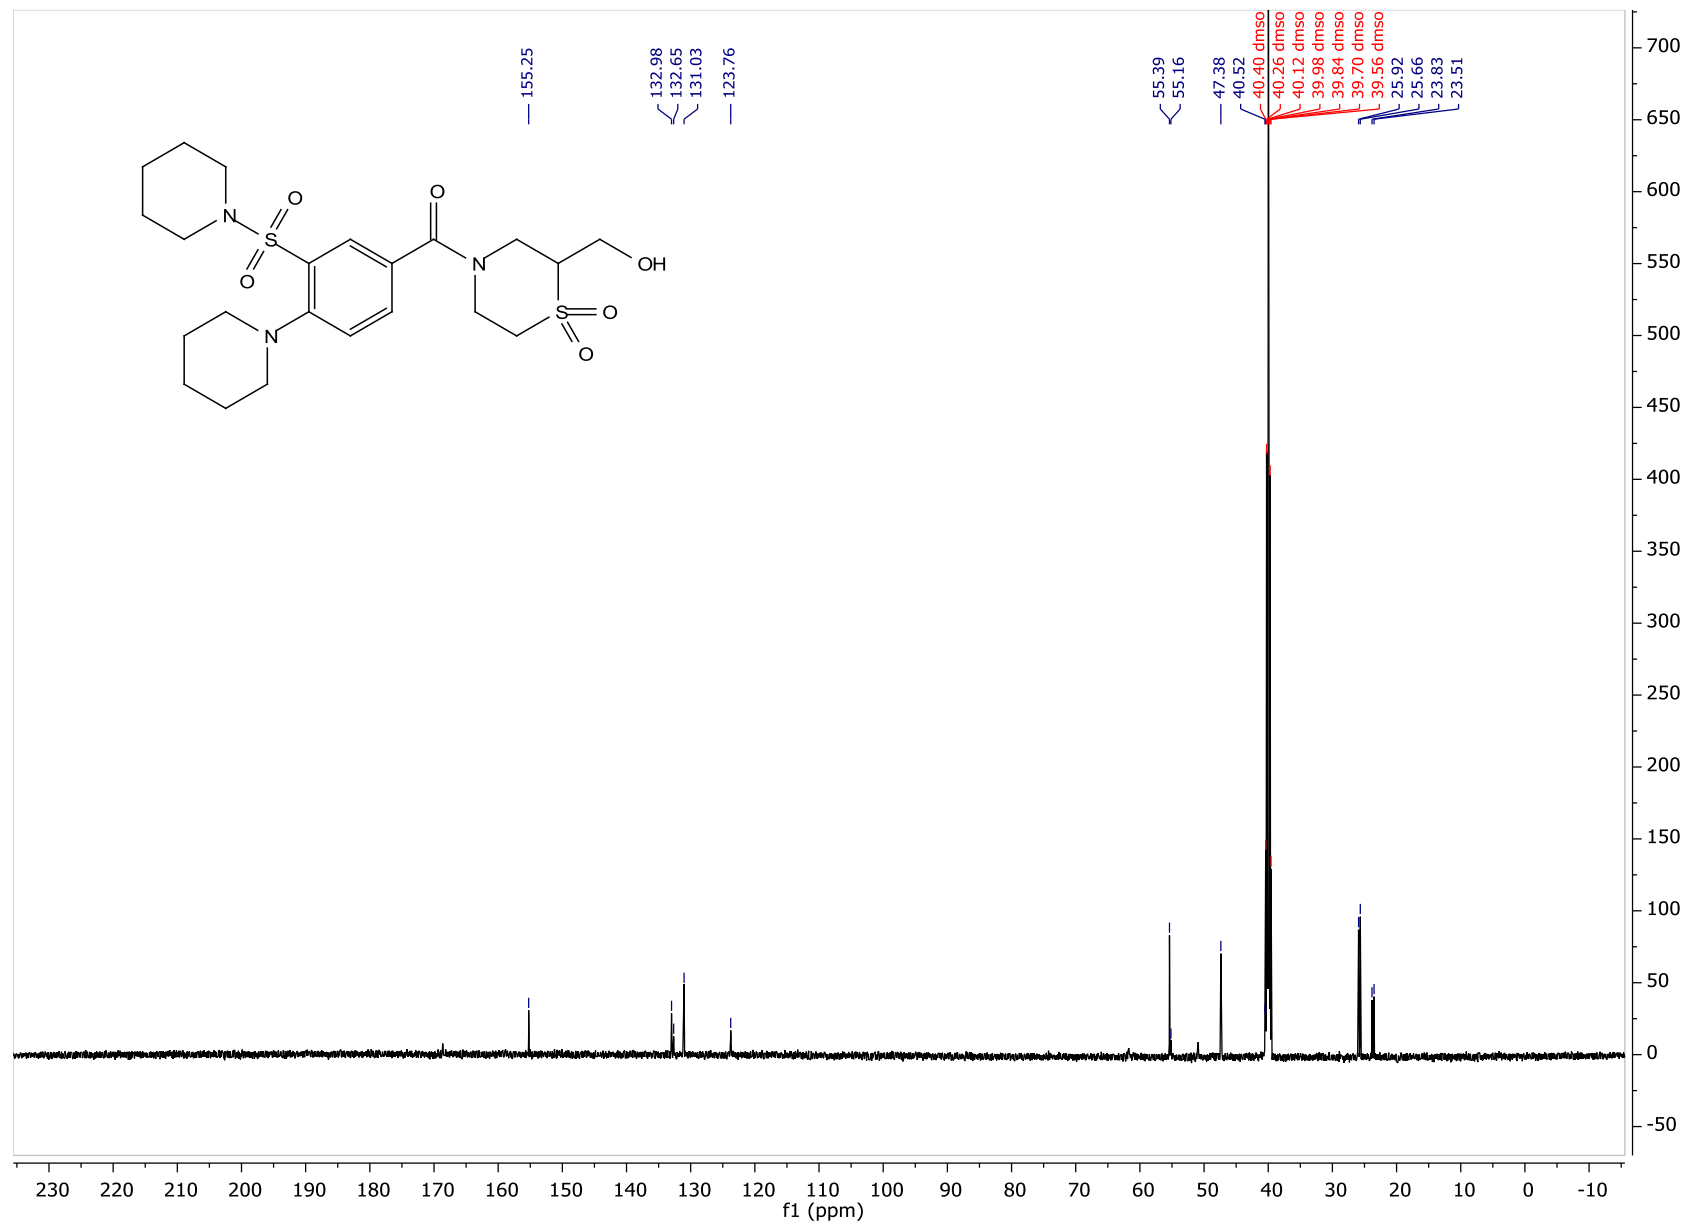

LC/MS spectrum of Z4886818415

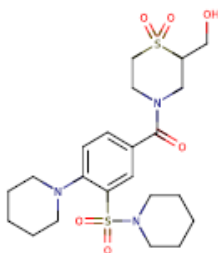

Mol Wt 499.64

Exact Mass 499.21

| # | Time  | Area% |
|---|-------|-------|
| 1 | 1.149 | 3.61  |
| 2 | 1.287 | 92.28 |
| 3 | 1.568 | 4.10  |

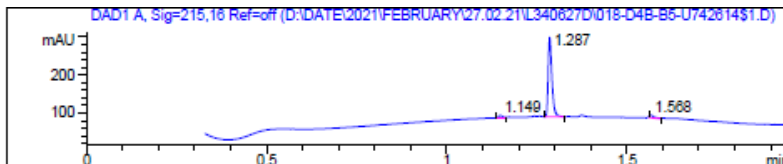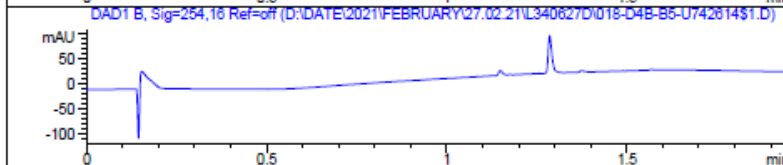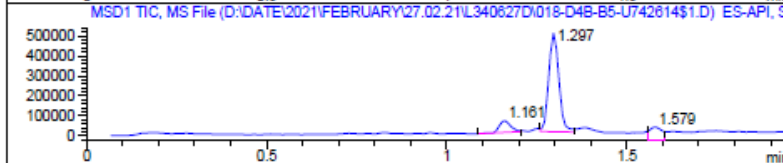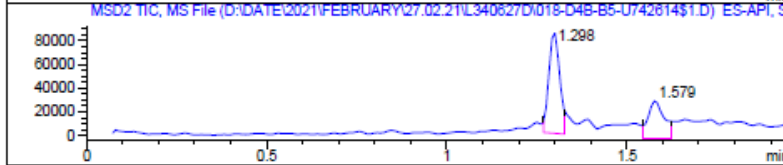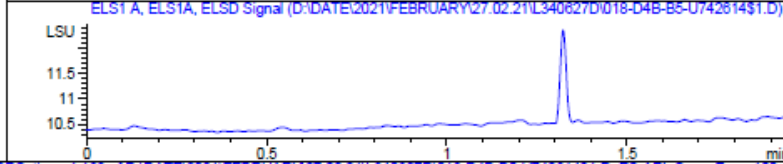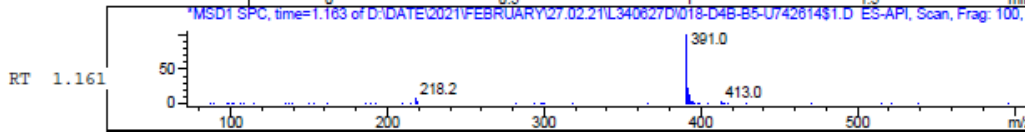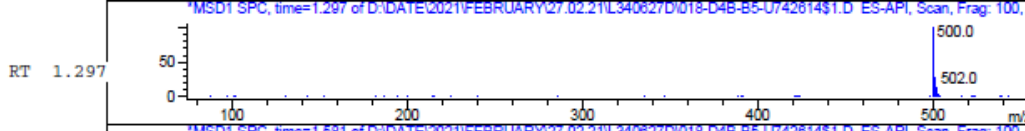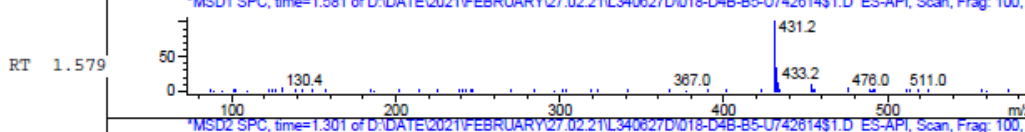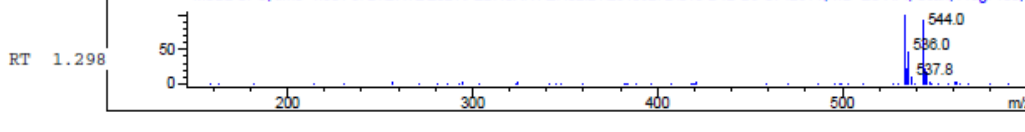

<sup>1</sup>H NMR spectrum of Z4886818417

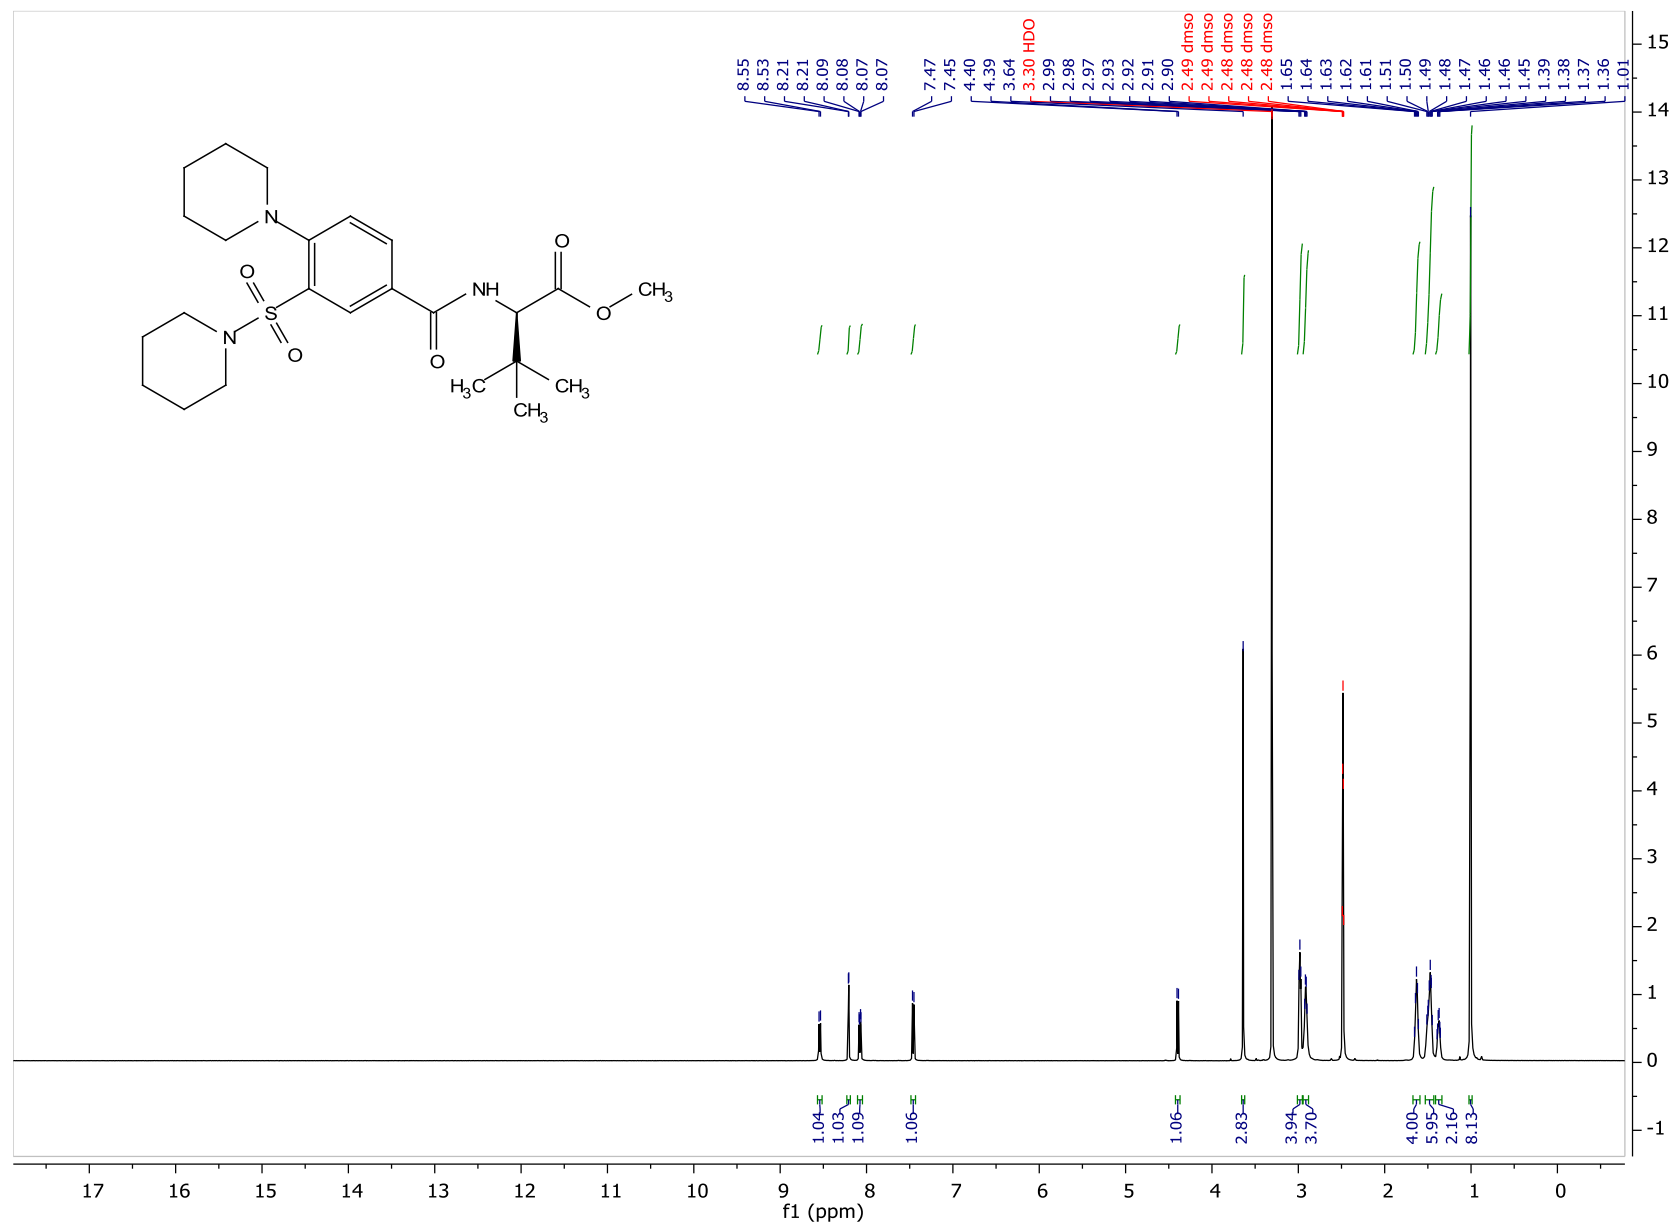

<sup>13</sup>C NMR spectrum of Z4886818417

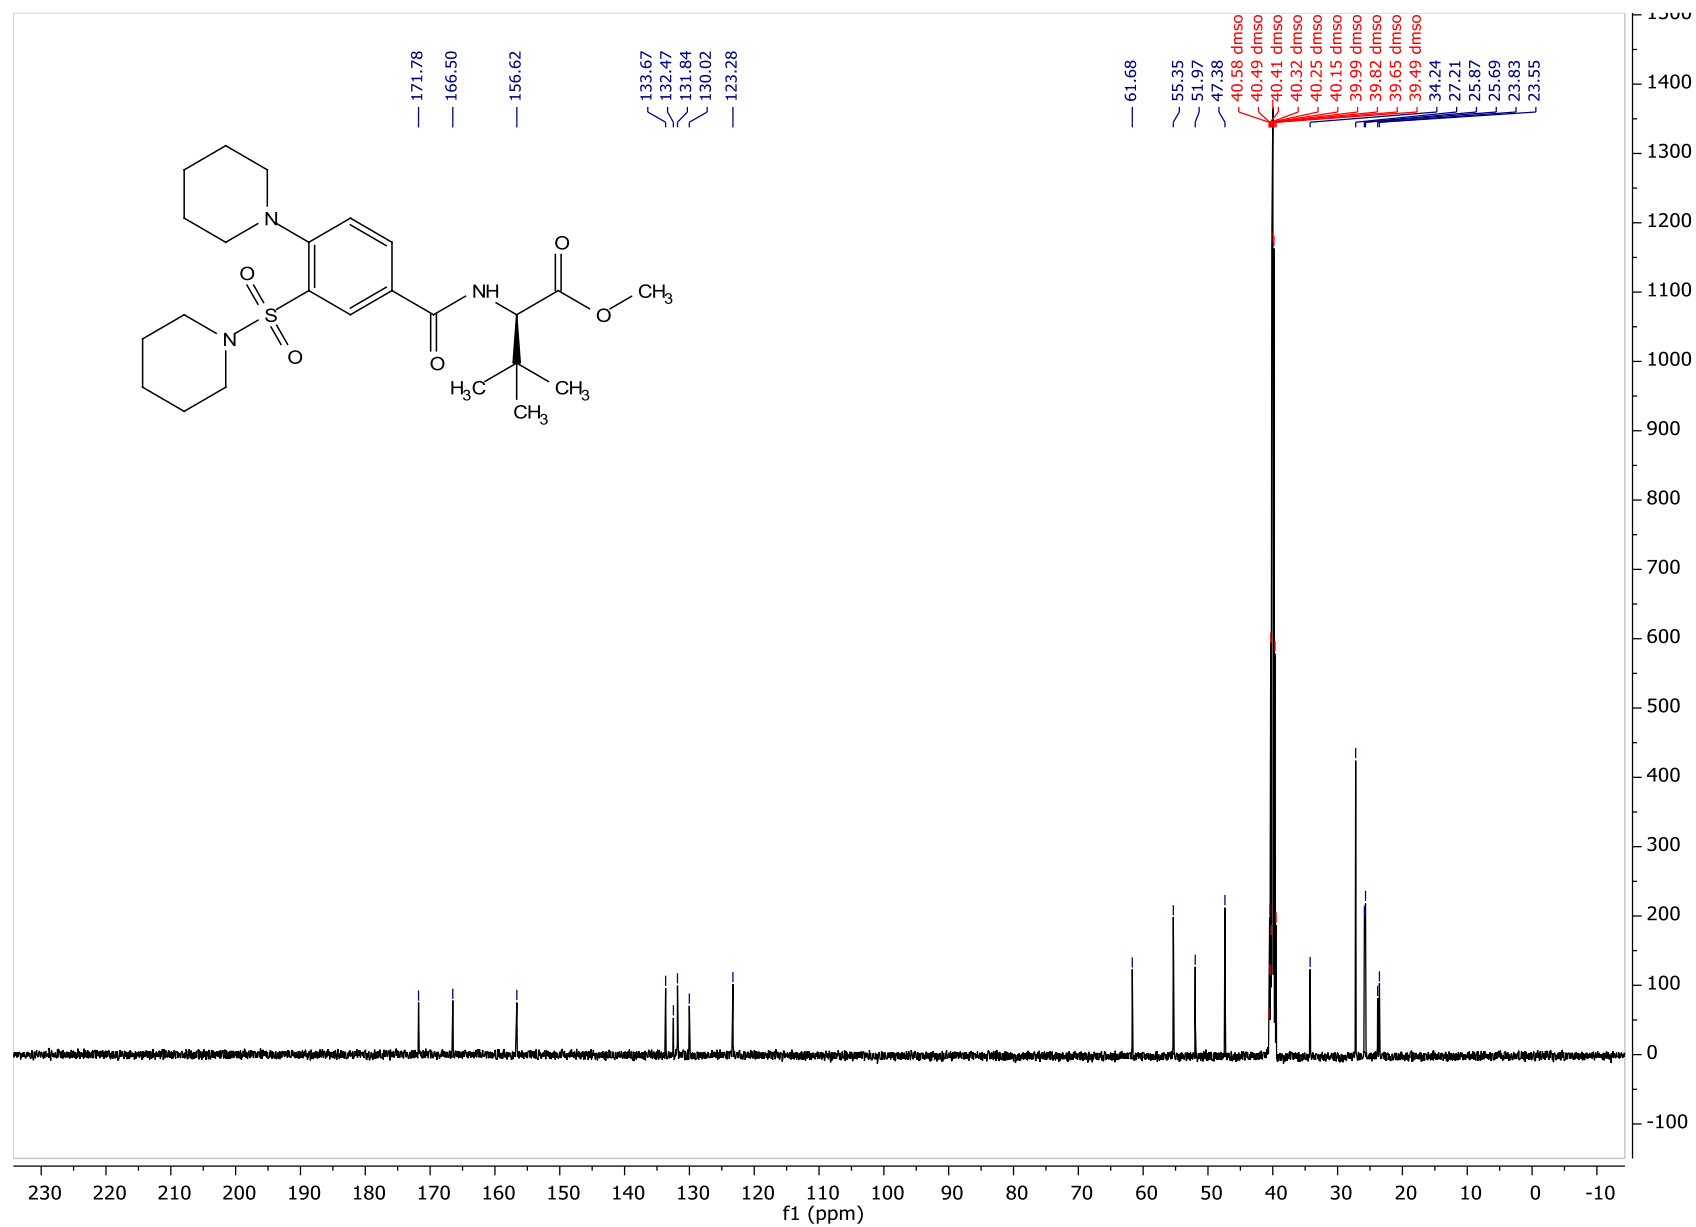

LC/MS spectrum of Z4886818417

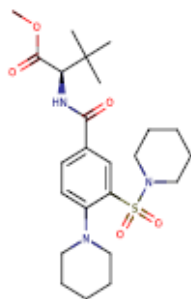

Mol Wt 479.63  
 Exact Mass 479.29  
 # Time Area%

| # | Time  | Area%  |
|---|-------|--------|
| 1 | 1.635 | 100.00 |

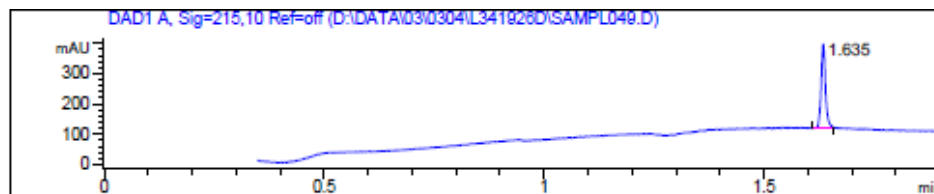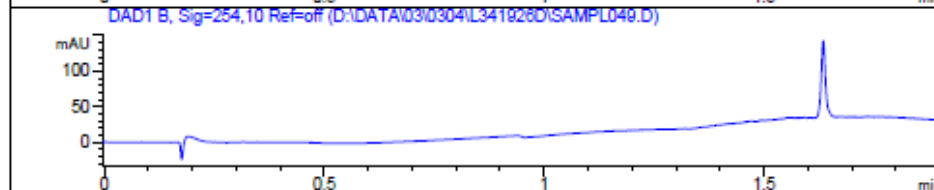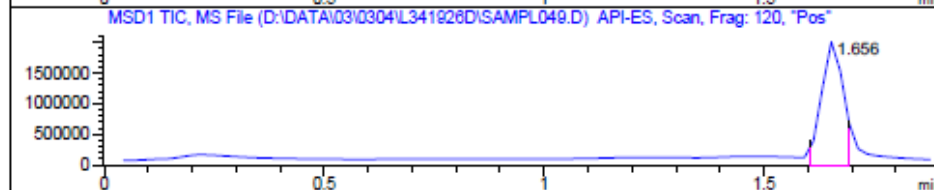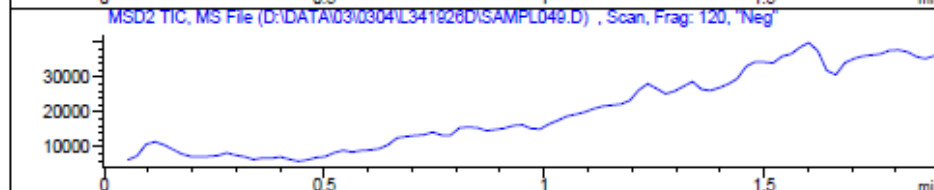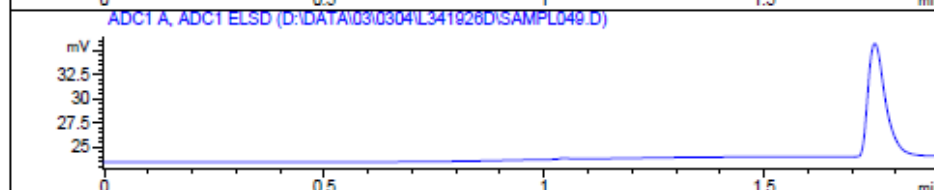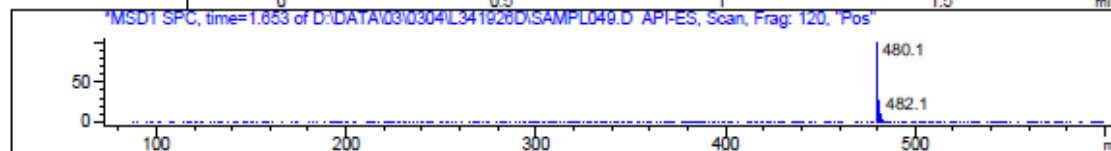

RT 1.656



<sup>1</sup>H NMR spectrum of Z4886818418

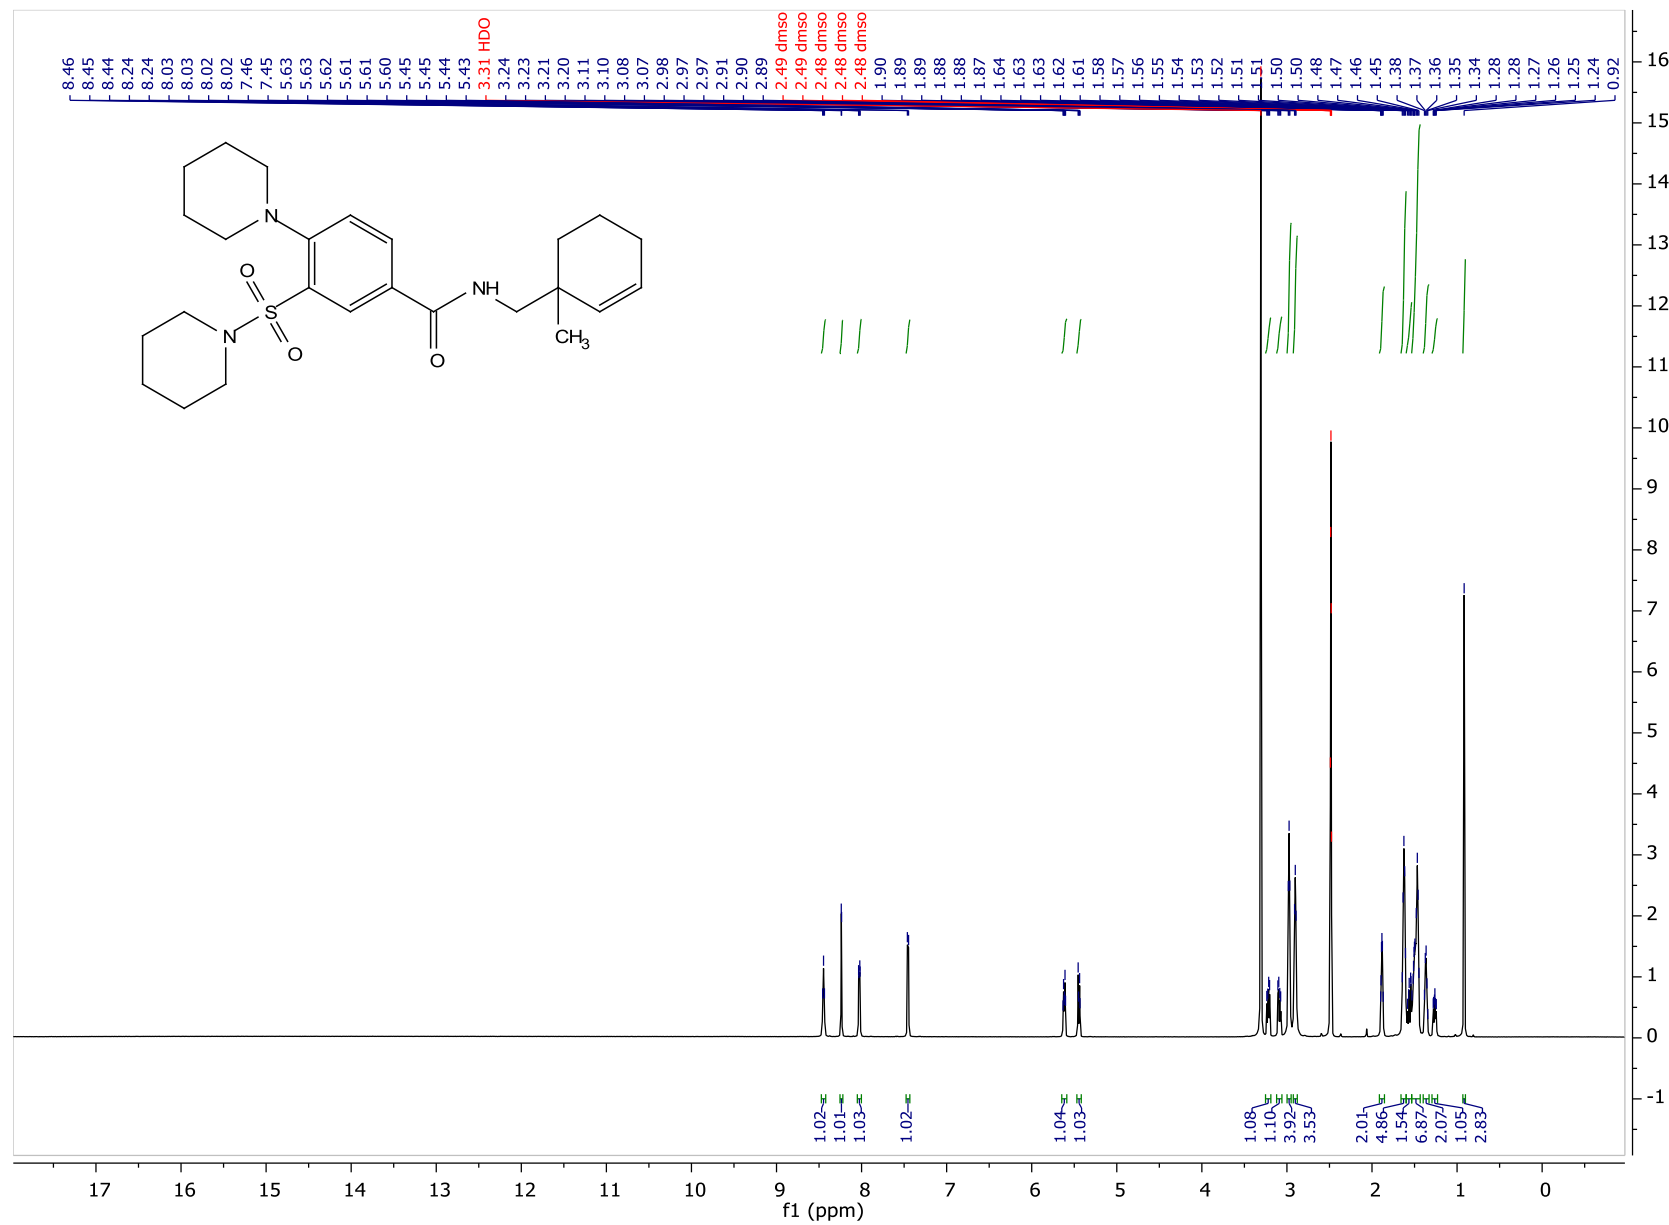

<sup>13</sup>C NMR spectrum of Z4886818418

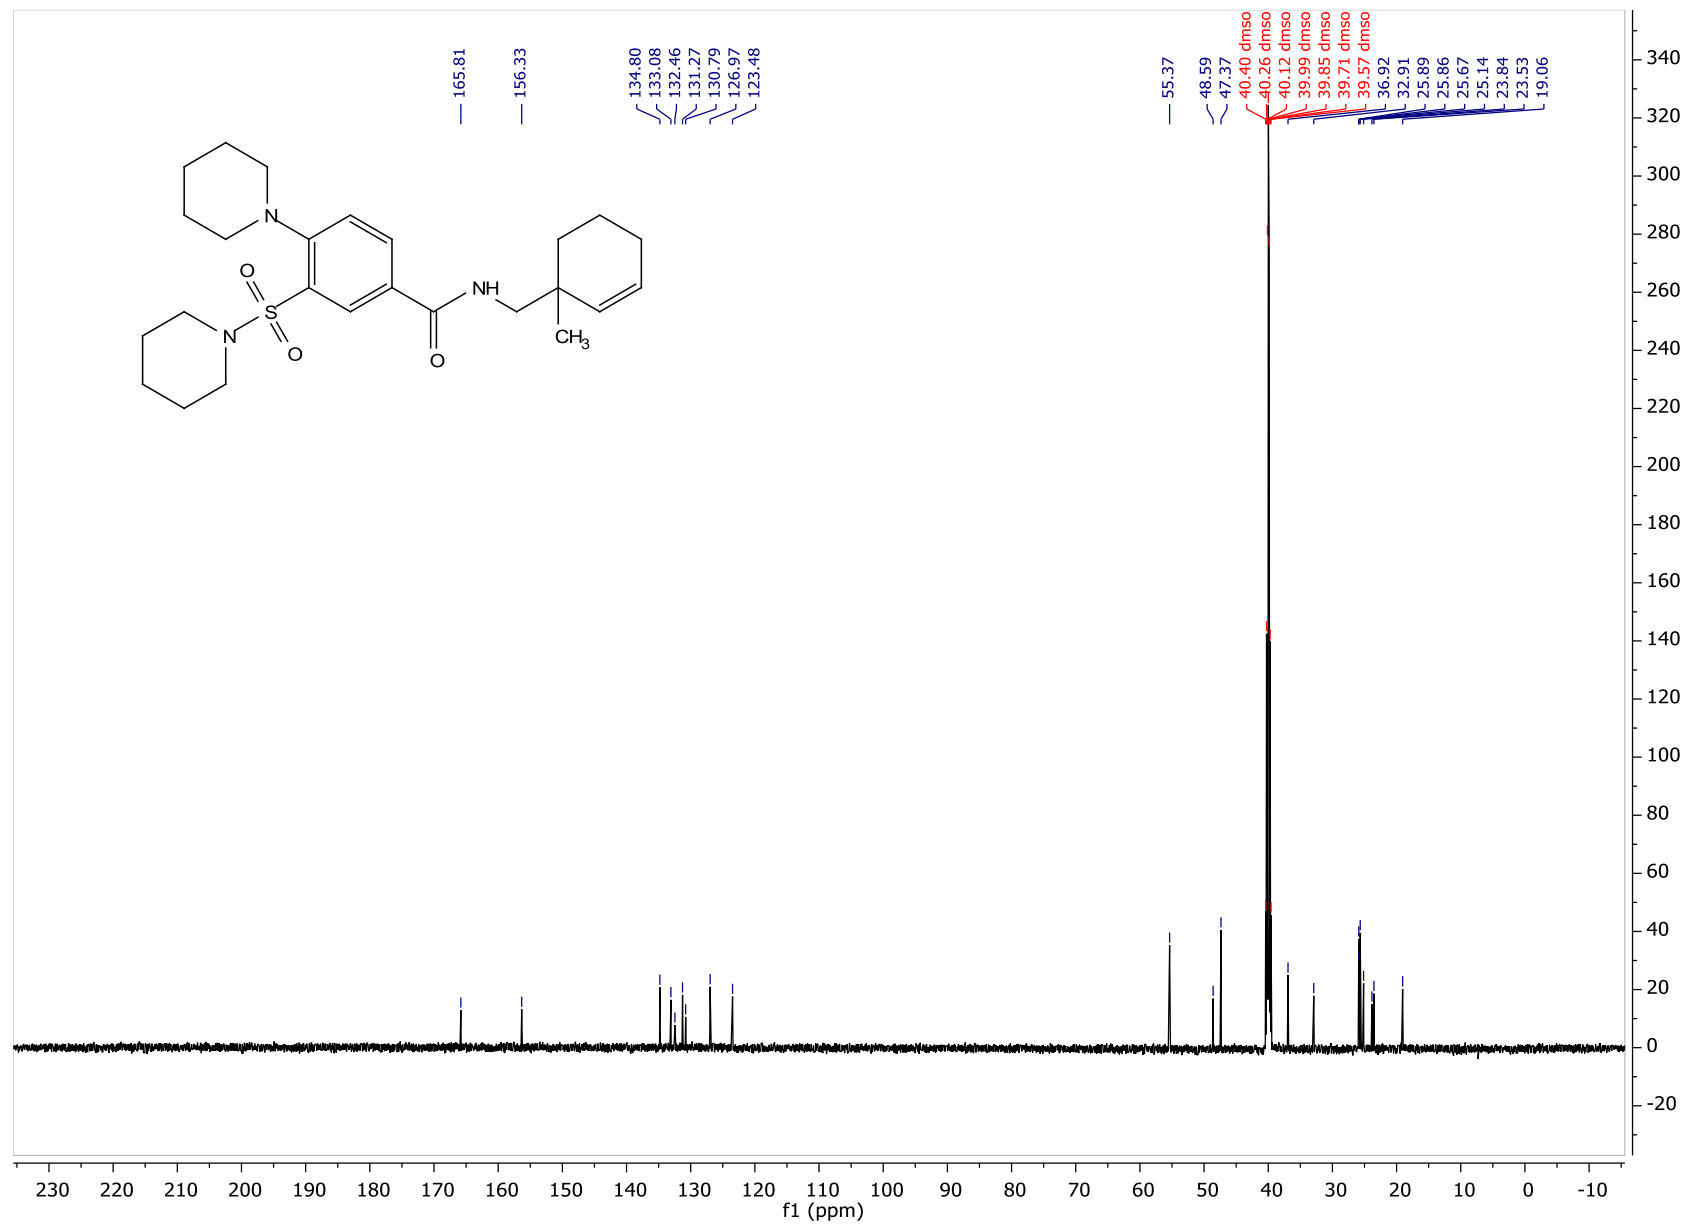

LC/MS spectrum of Z4886818418

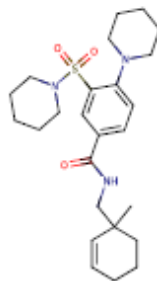

Mol Wt 459.64  
 Exact Mass 459.31

| # | Time  | Area%  |
|---|-------|--------|
| 1 | 1.679 | 100.00 |

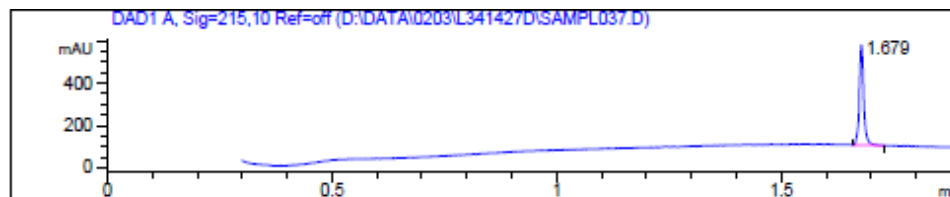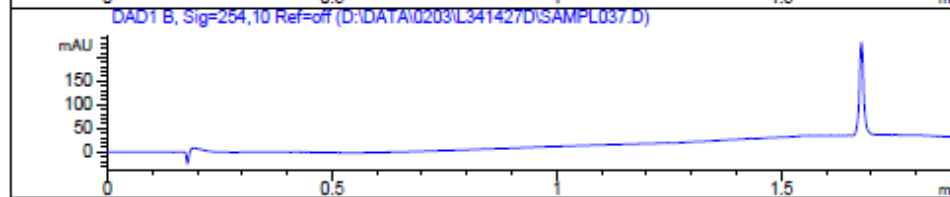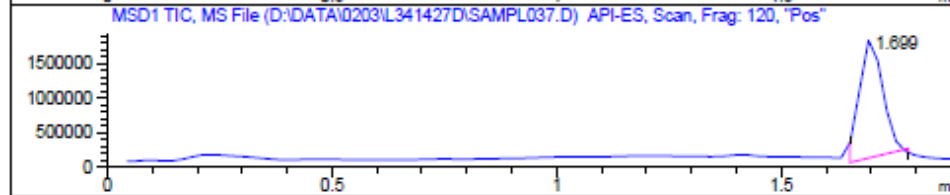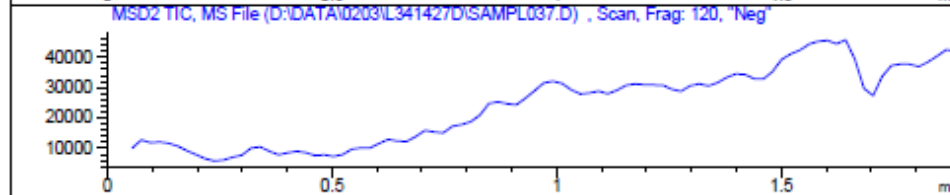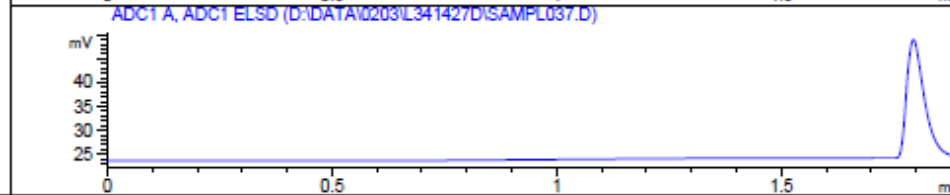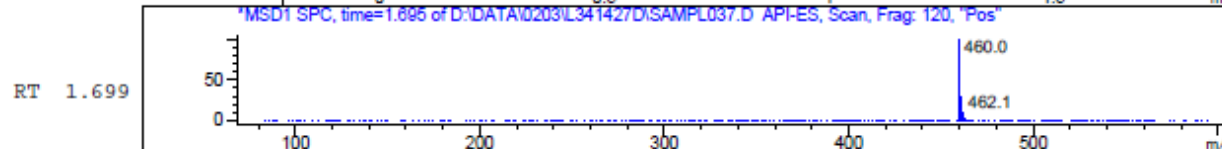

RT 1.699

<sup>1</sup>H NMR spectrum of Z4886818428

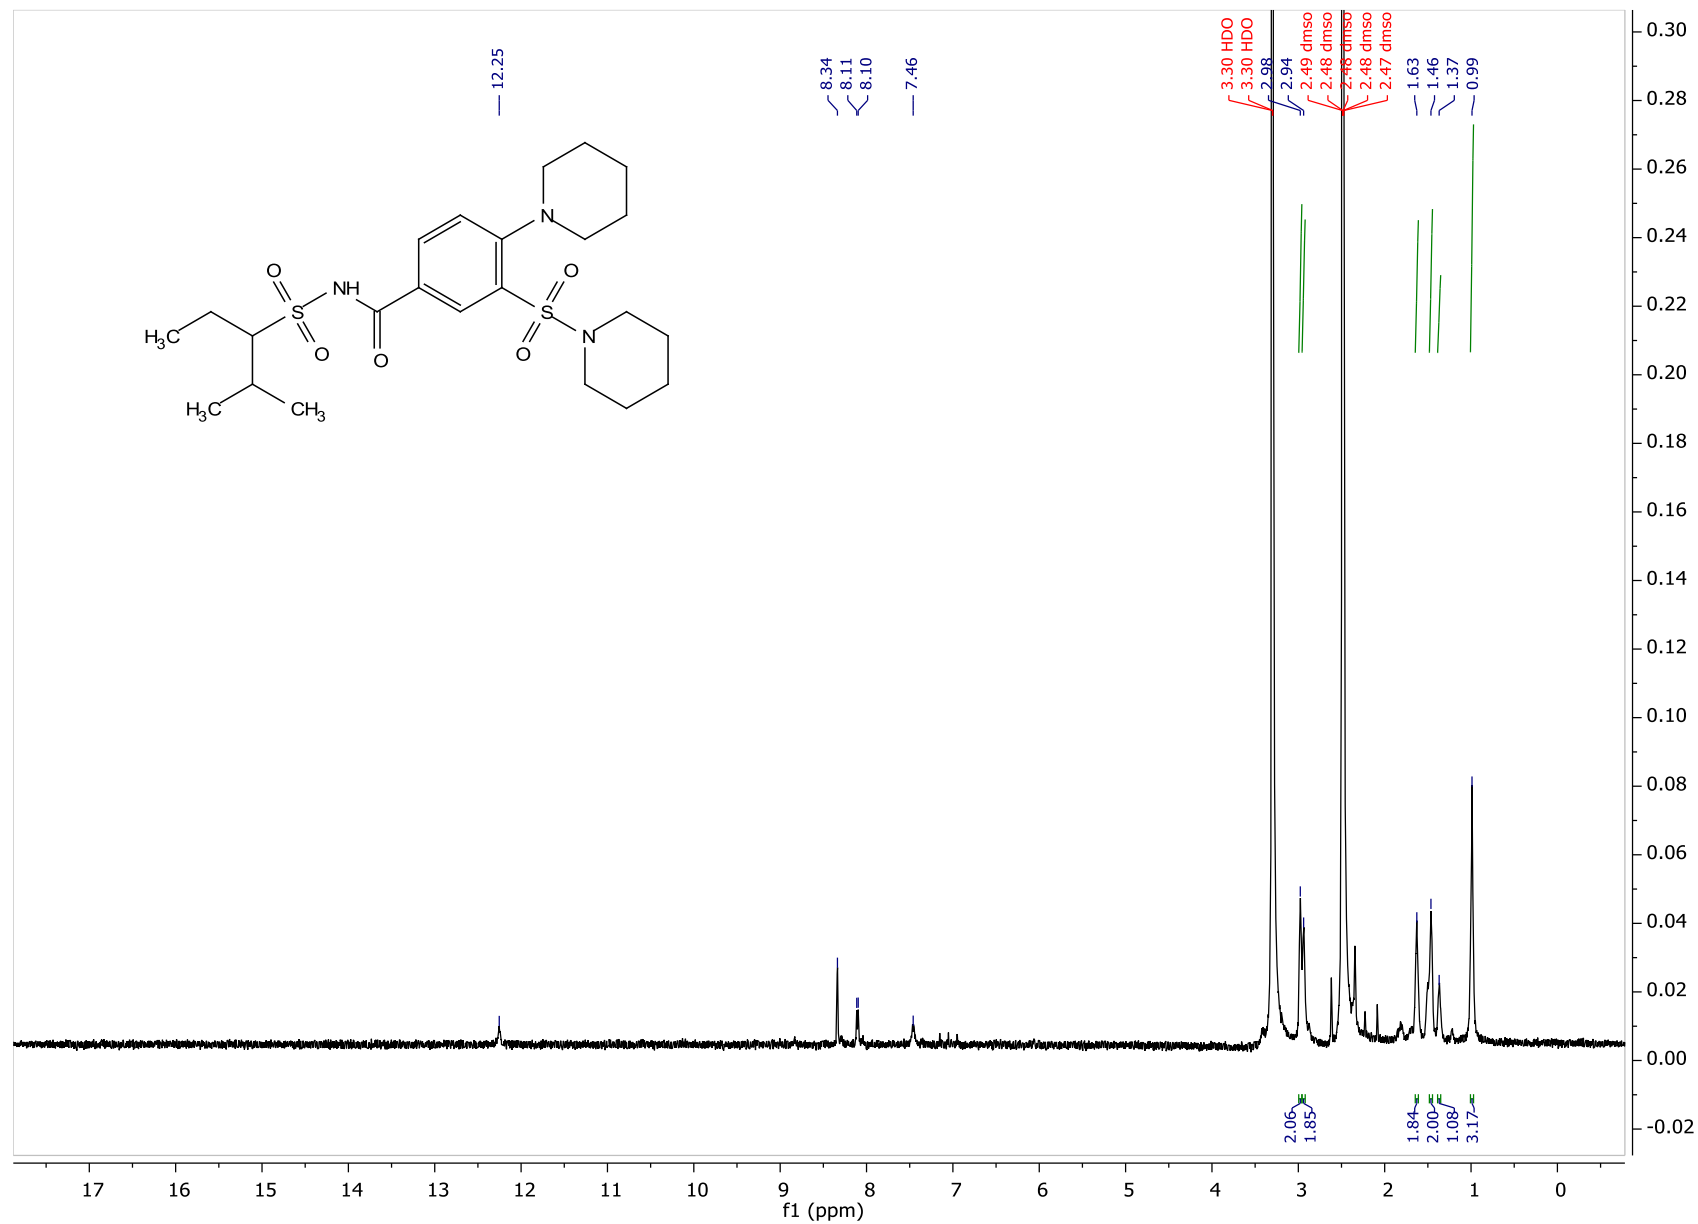

LC/MS spectrum of Z4886818428

Ret\_Time: 1.675 min

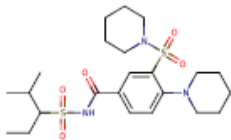

Mol Wt 499.69  
Exact Mass 499.26

| # | Time  | Area% |
|---|-------|-------|
| 1 | 1.567 | 9.41  |
| 2 | 1.675 | 90.59 |

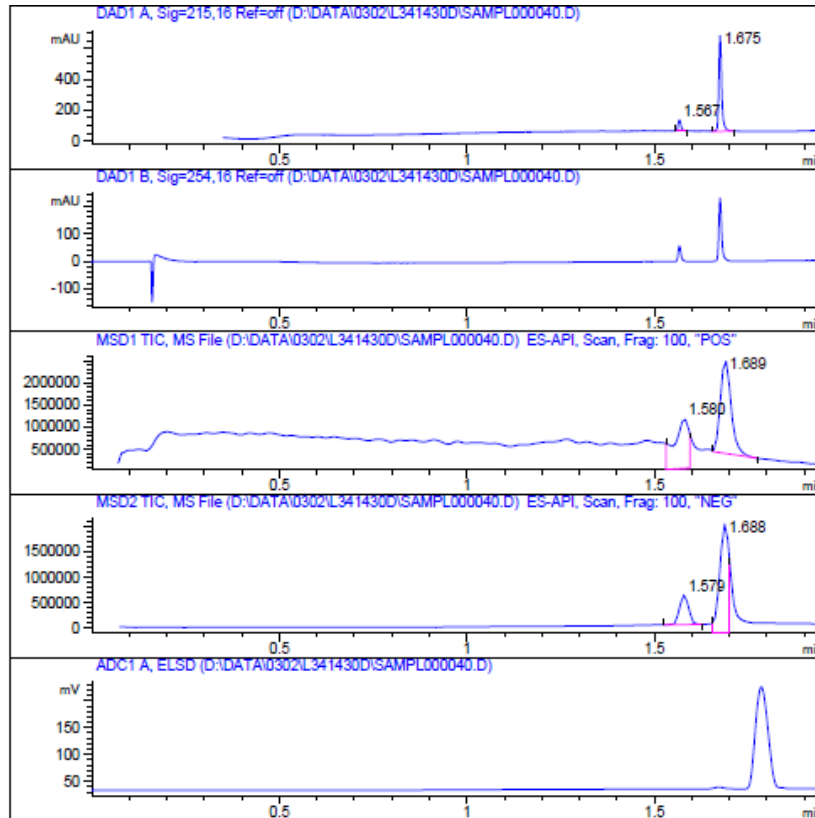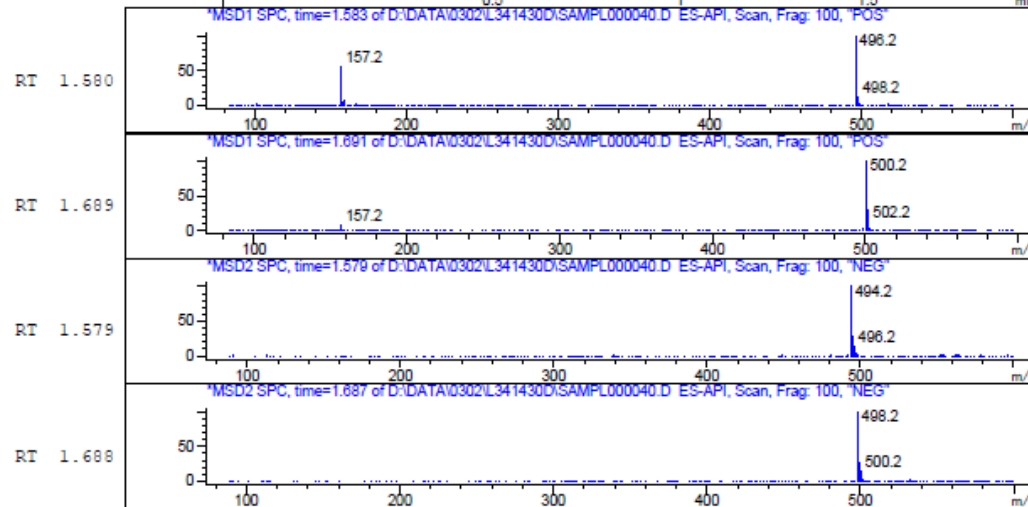

<sup>1</sup>H NMR spectrum of Z4886818436

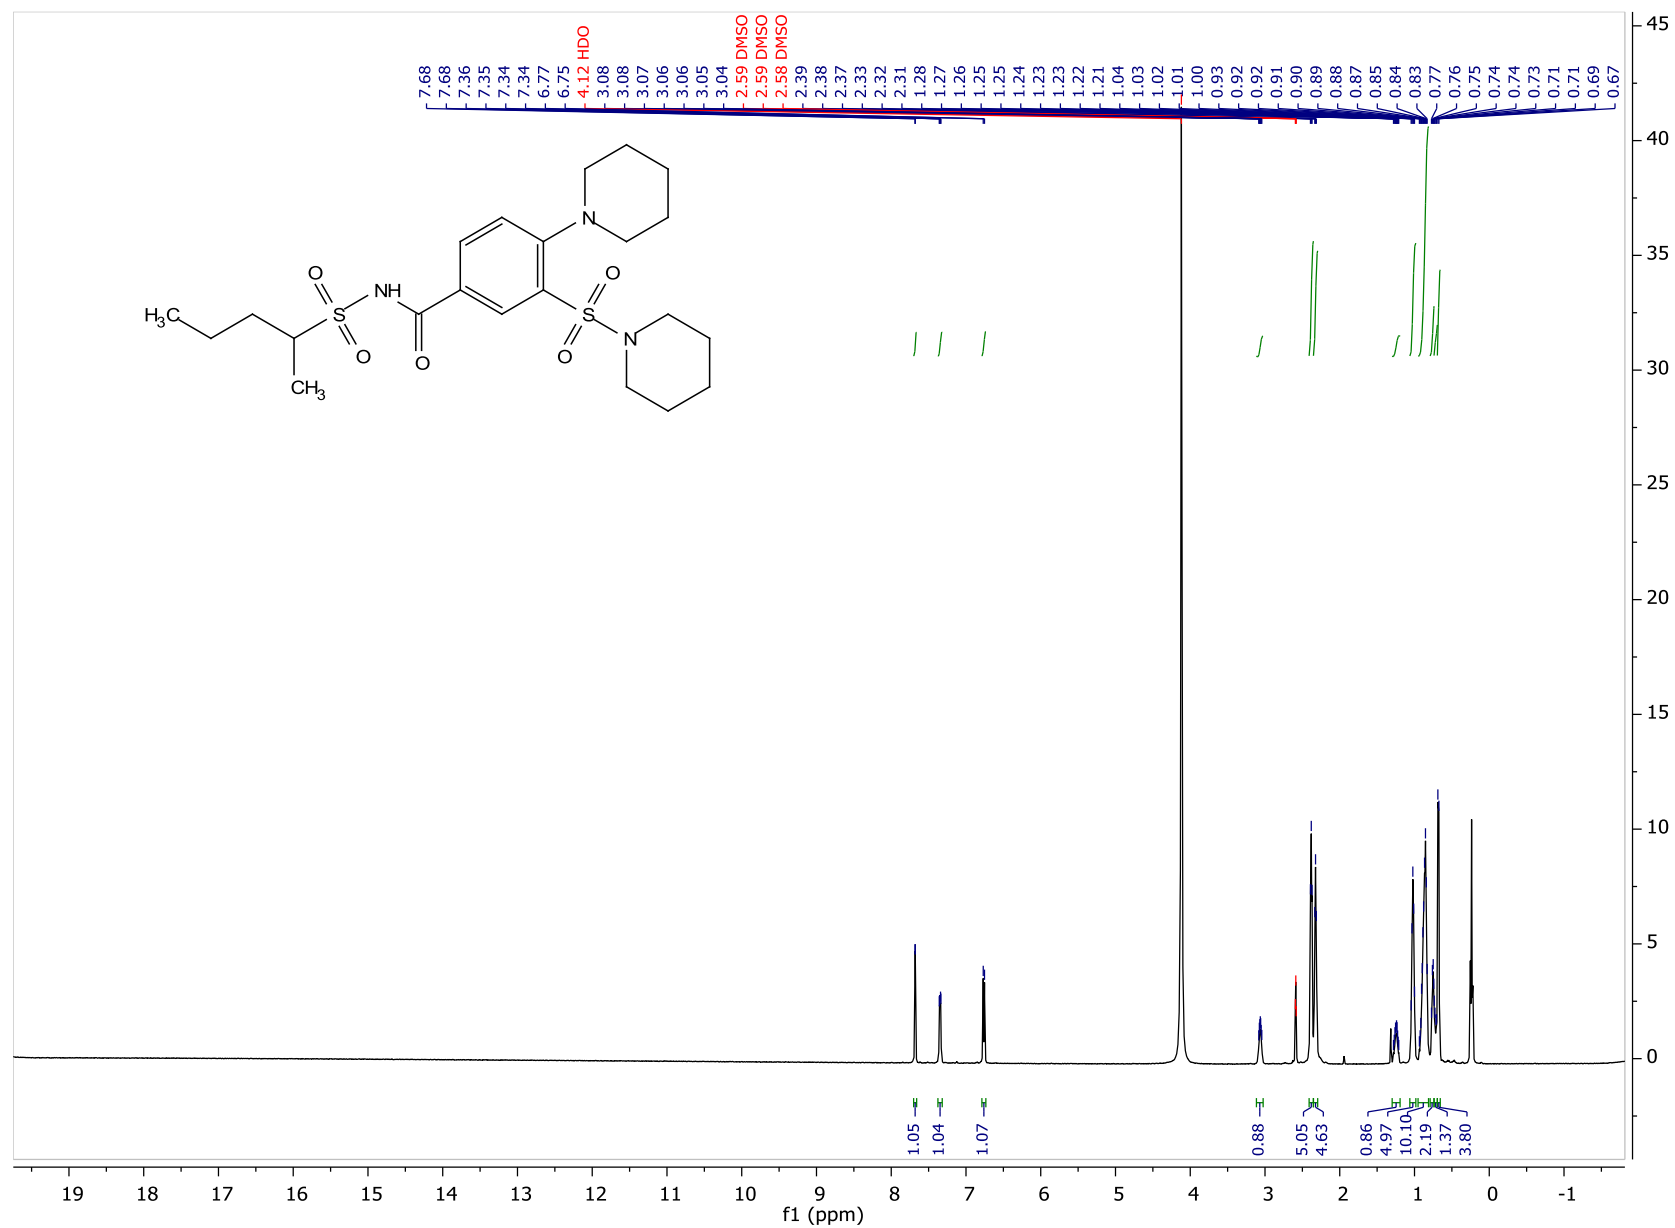

<sup>13</sup>C NMR spectrum of Z4886818436

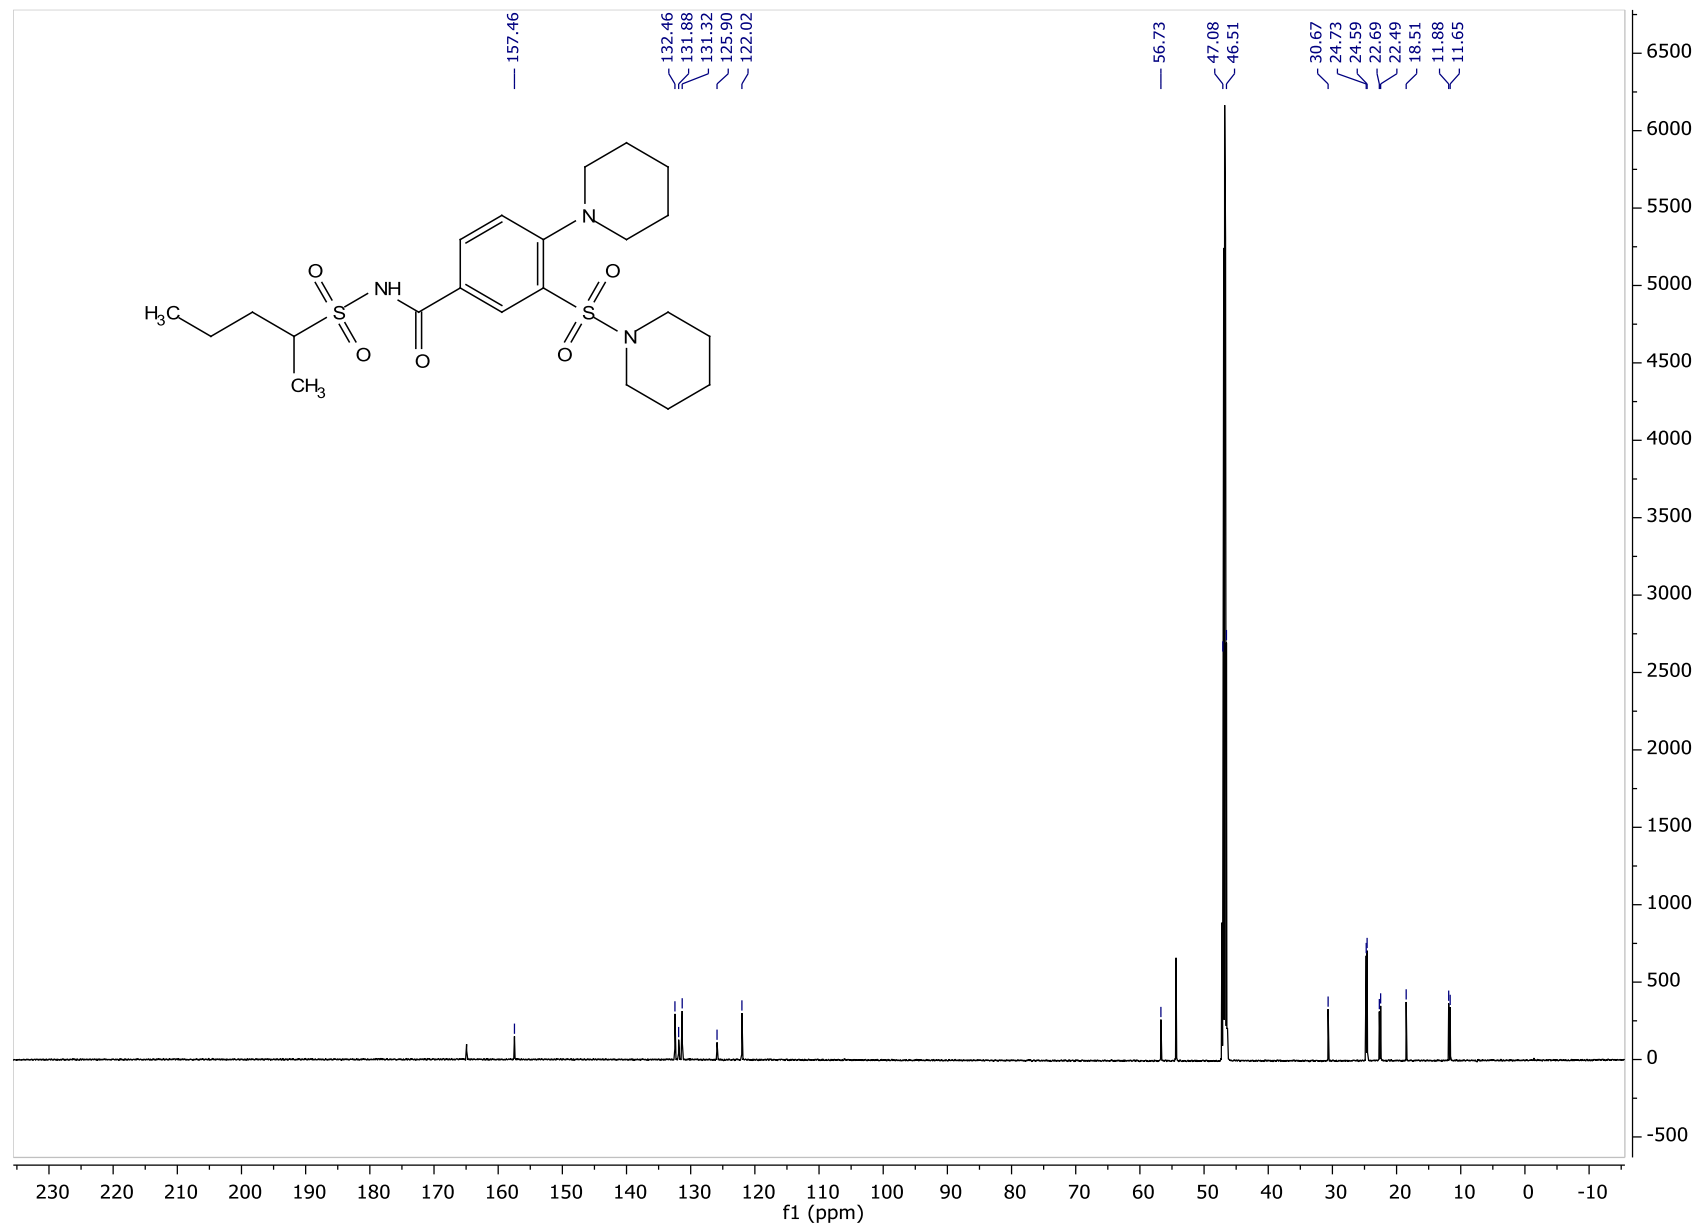

LC/MS spectrum of Z4886818436

Ret\_Time: 1.639 min

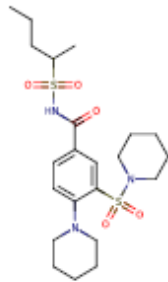

Mol Wt 485.66  
Exact Mass 485.24

| # | Time  | Area%  |
|---|-------|--------|
| 1 | 1.639 | 100.00 |

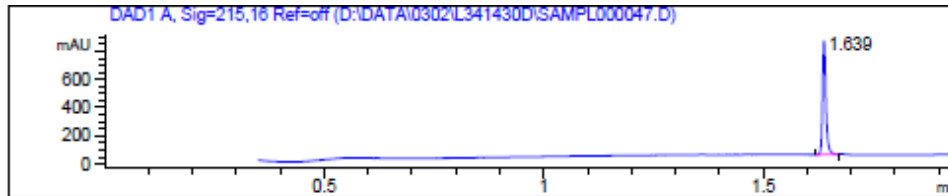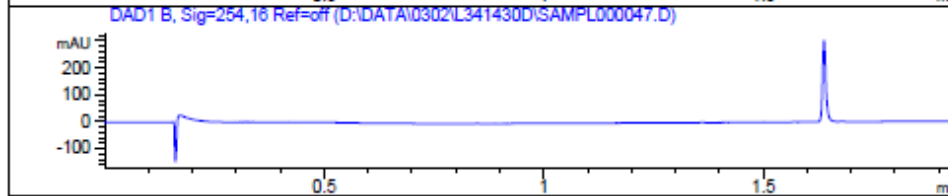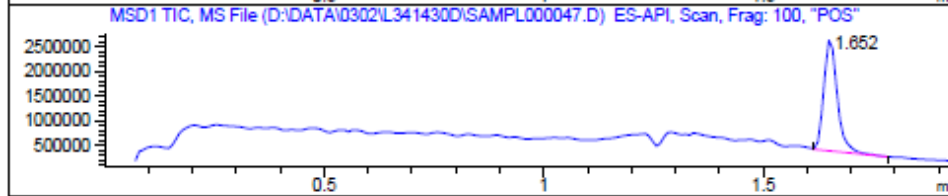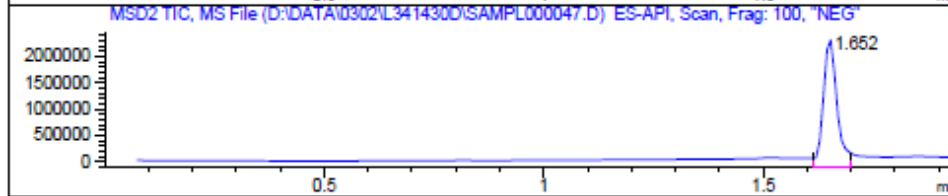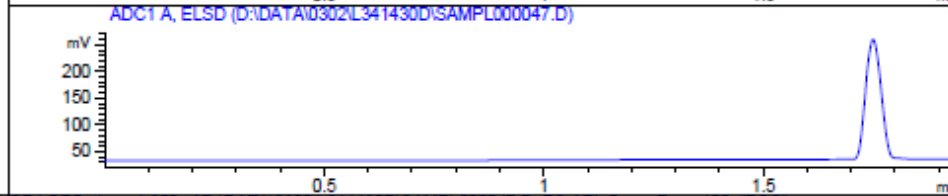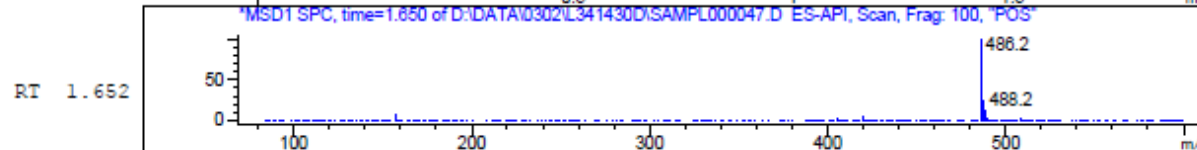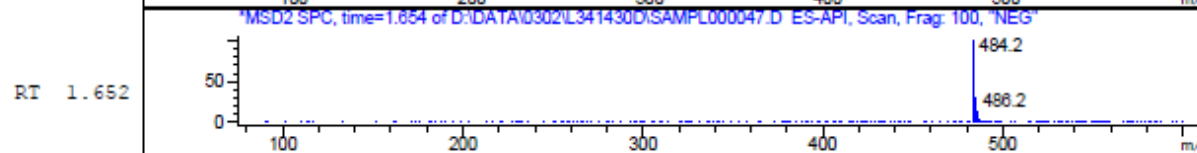



<sup>1</sup>H NMR spectrum of Z4886818445

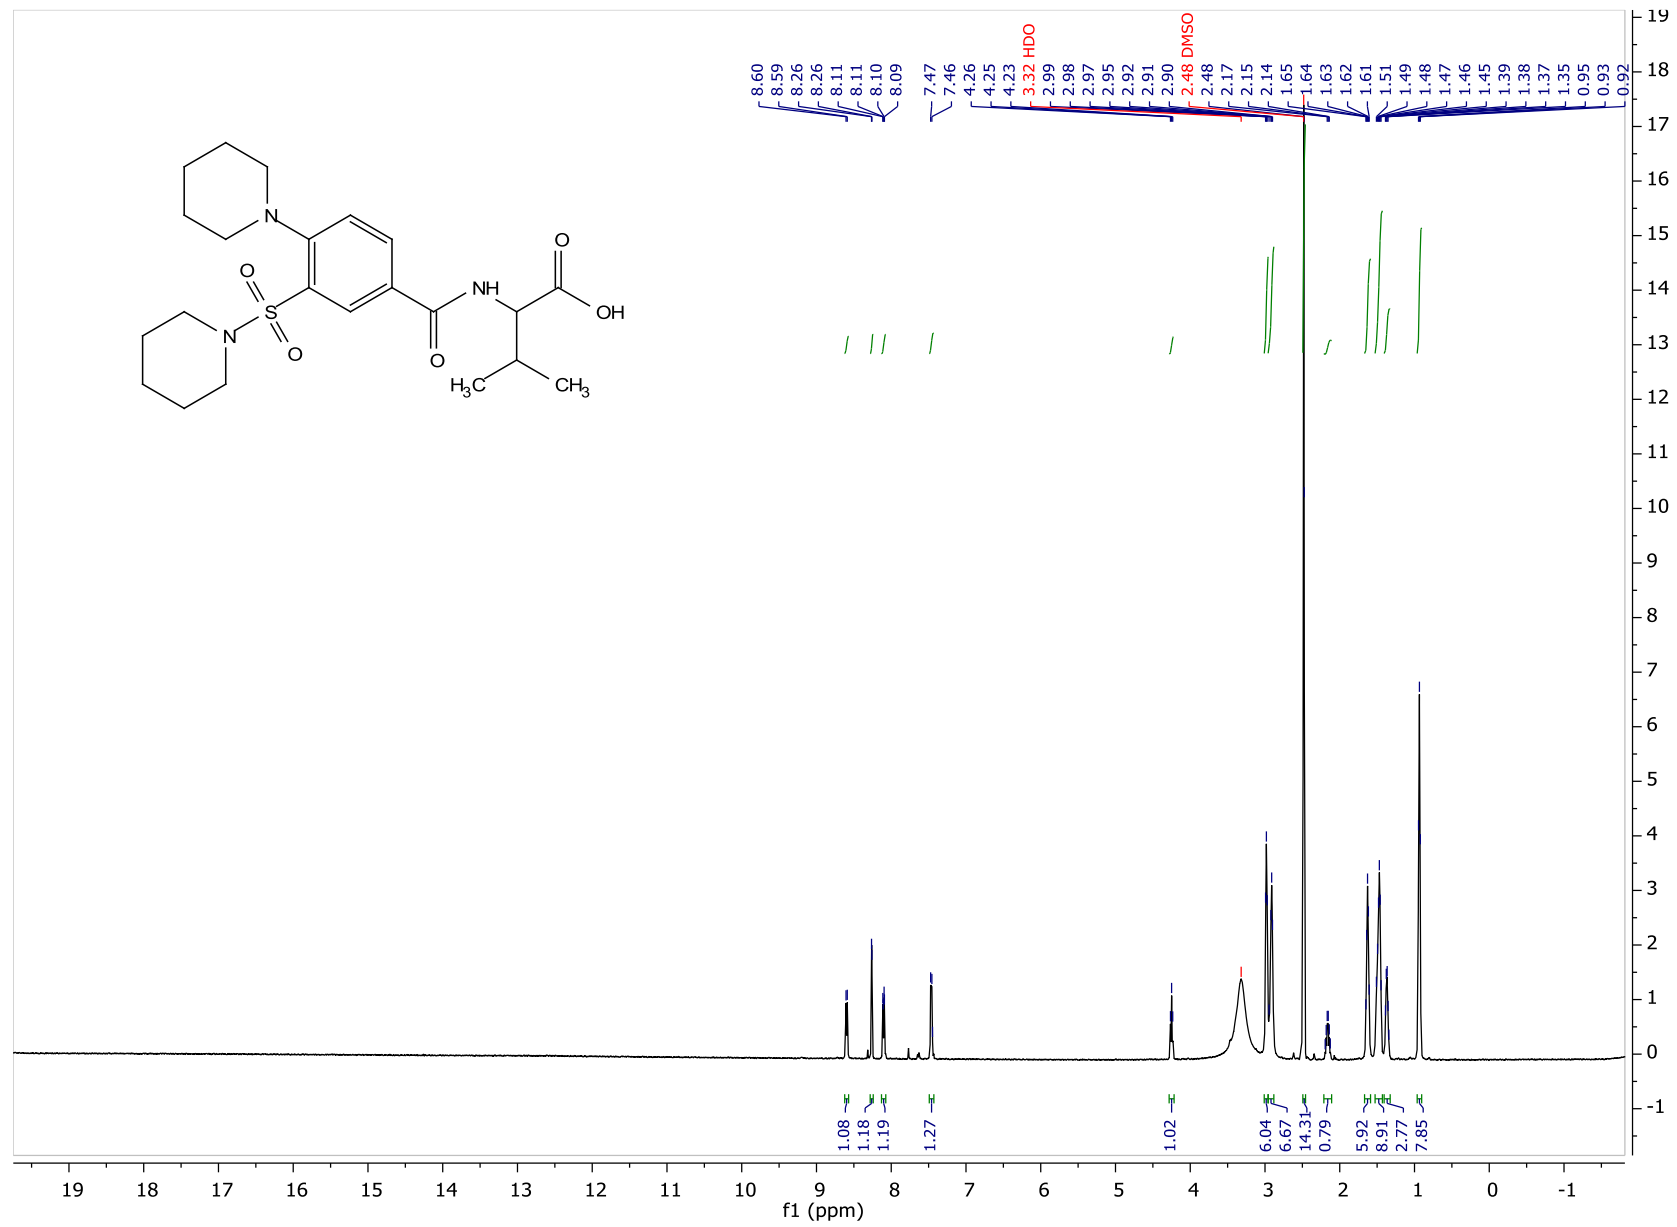

<sup>13</sup>C NMR spectrum of Z4886818445

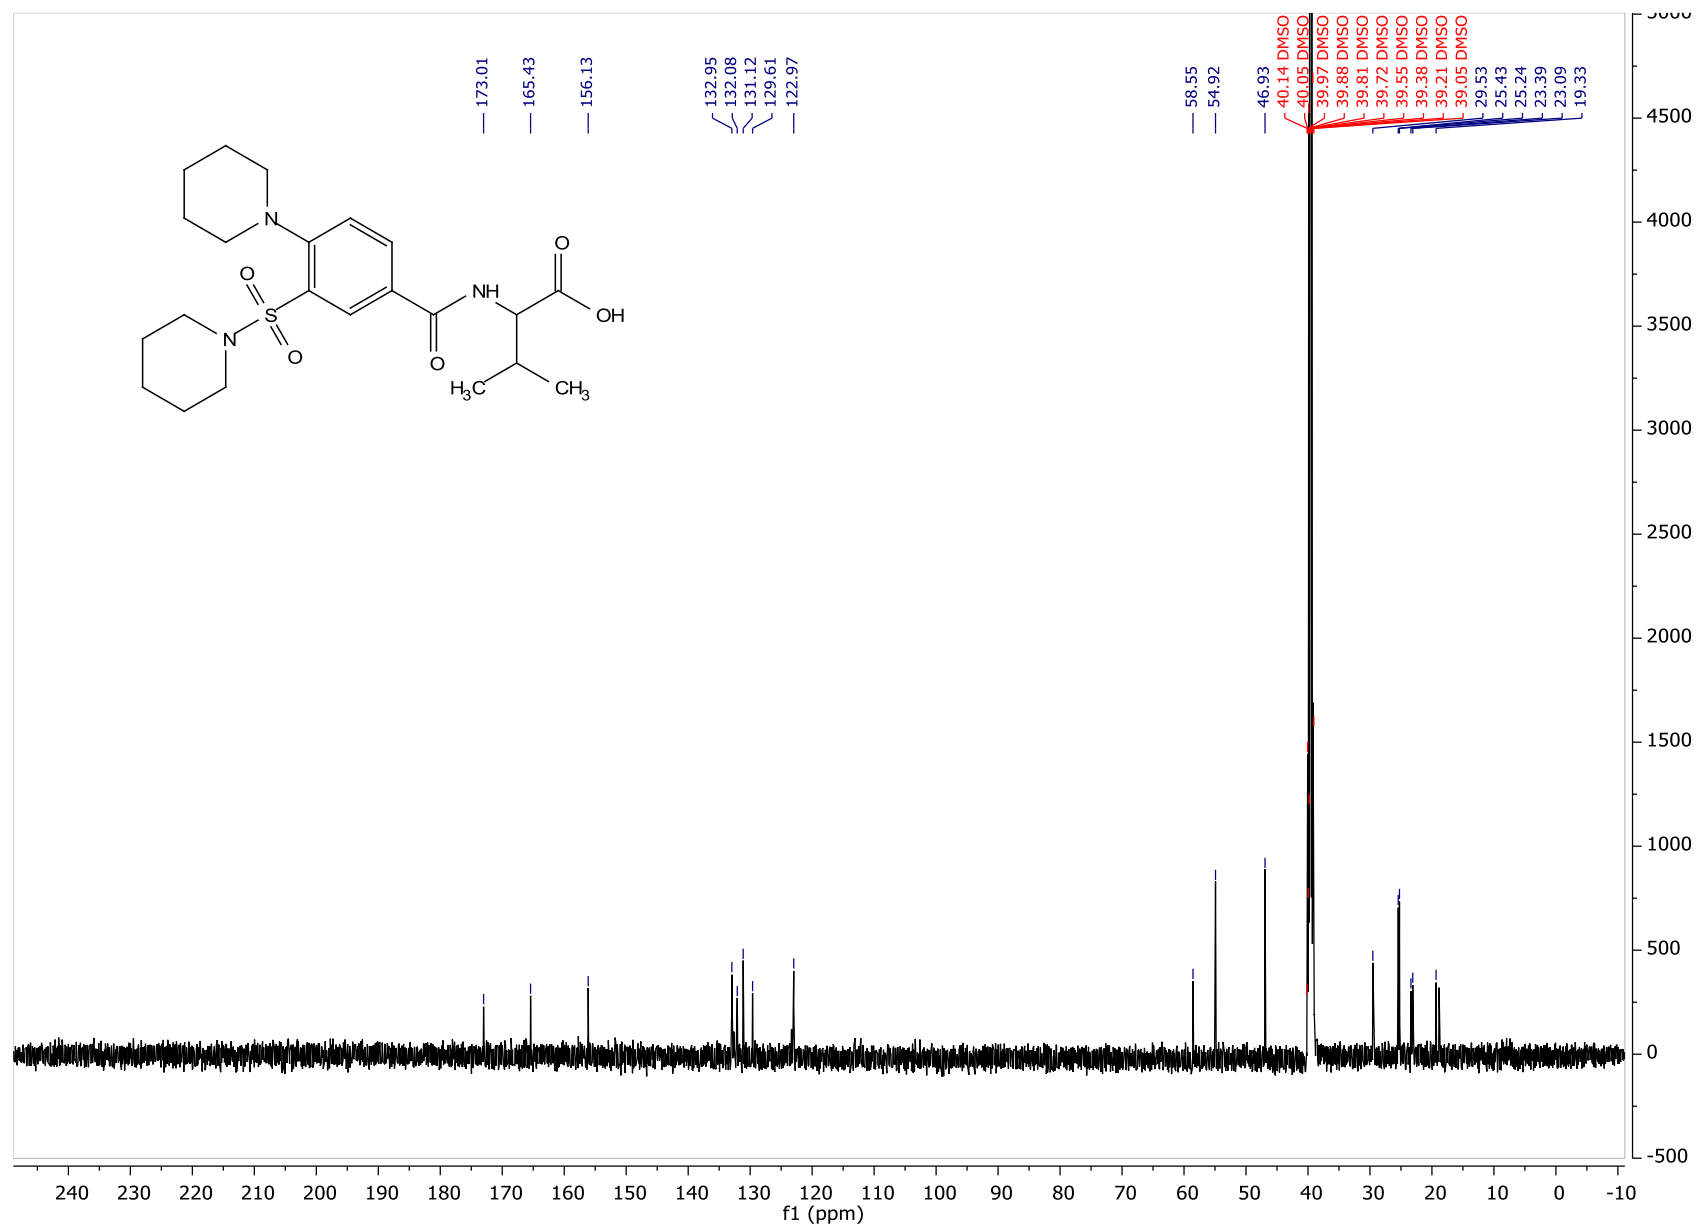

LC/MS spectrum of Z4886818445

Ret\_Time: 3.891 min

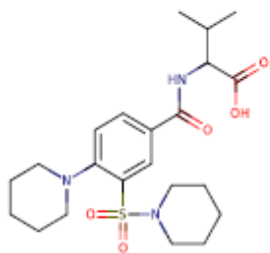

Mol Wt 451.58  
Exact Mass 451.25

| # | Time  | Area% |
|---|-------|-------|
| 1 | 3.841 | 8.63  |
| 2 | 3.891 | 91.37 |

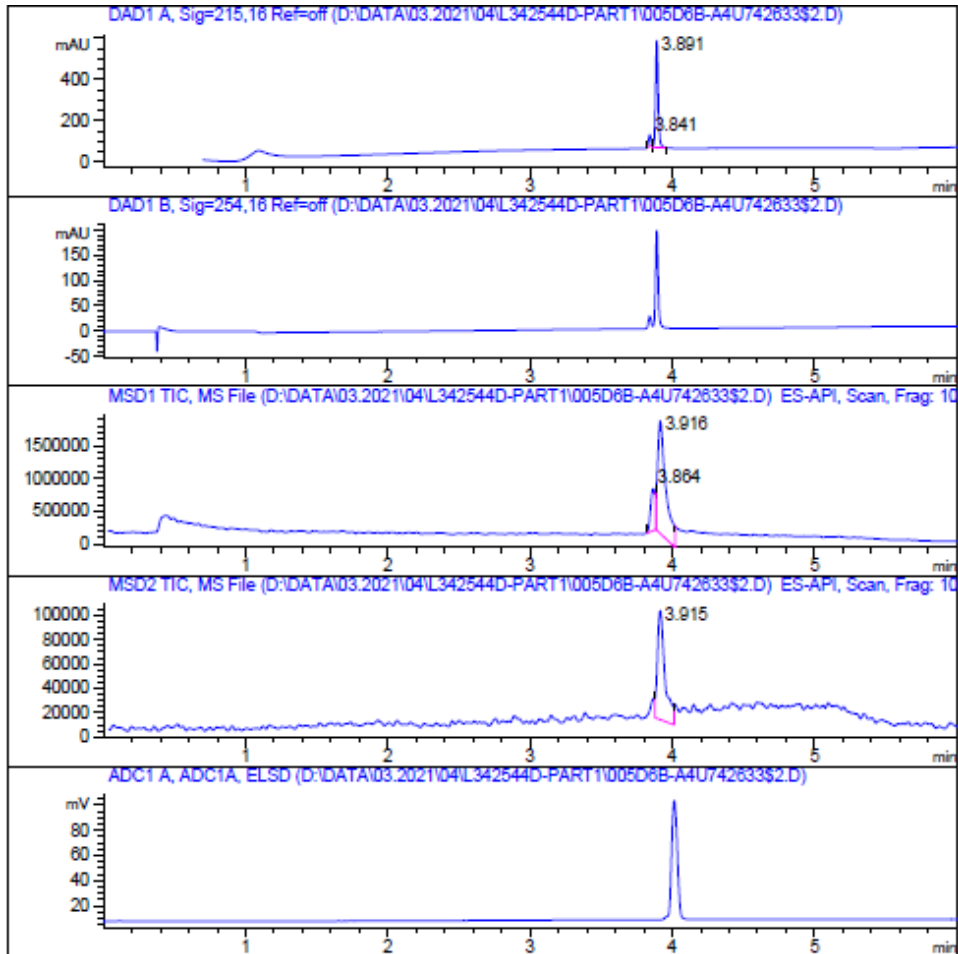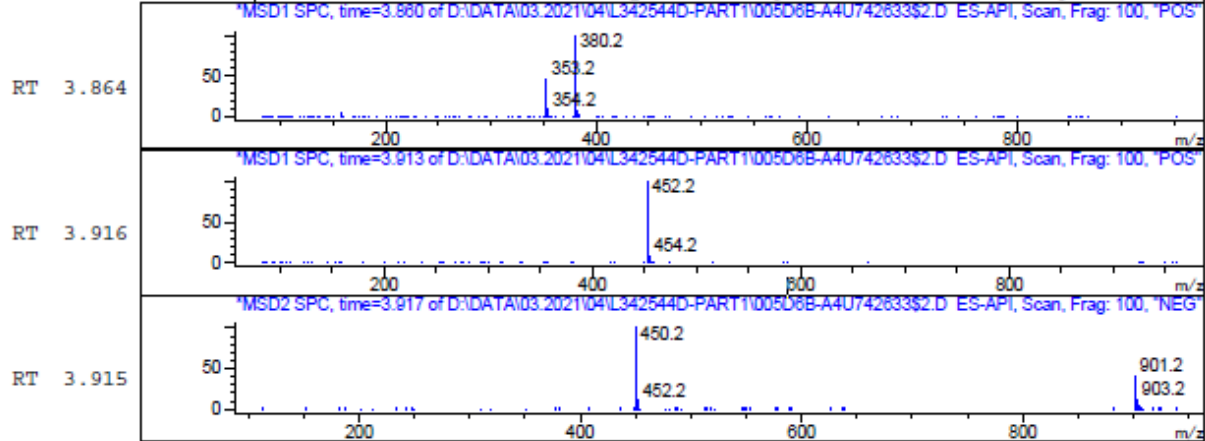

<sup>1</sup>H NMR spectrum of Z4886818449

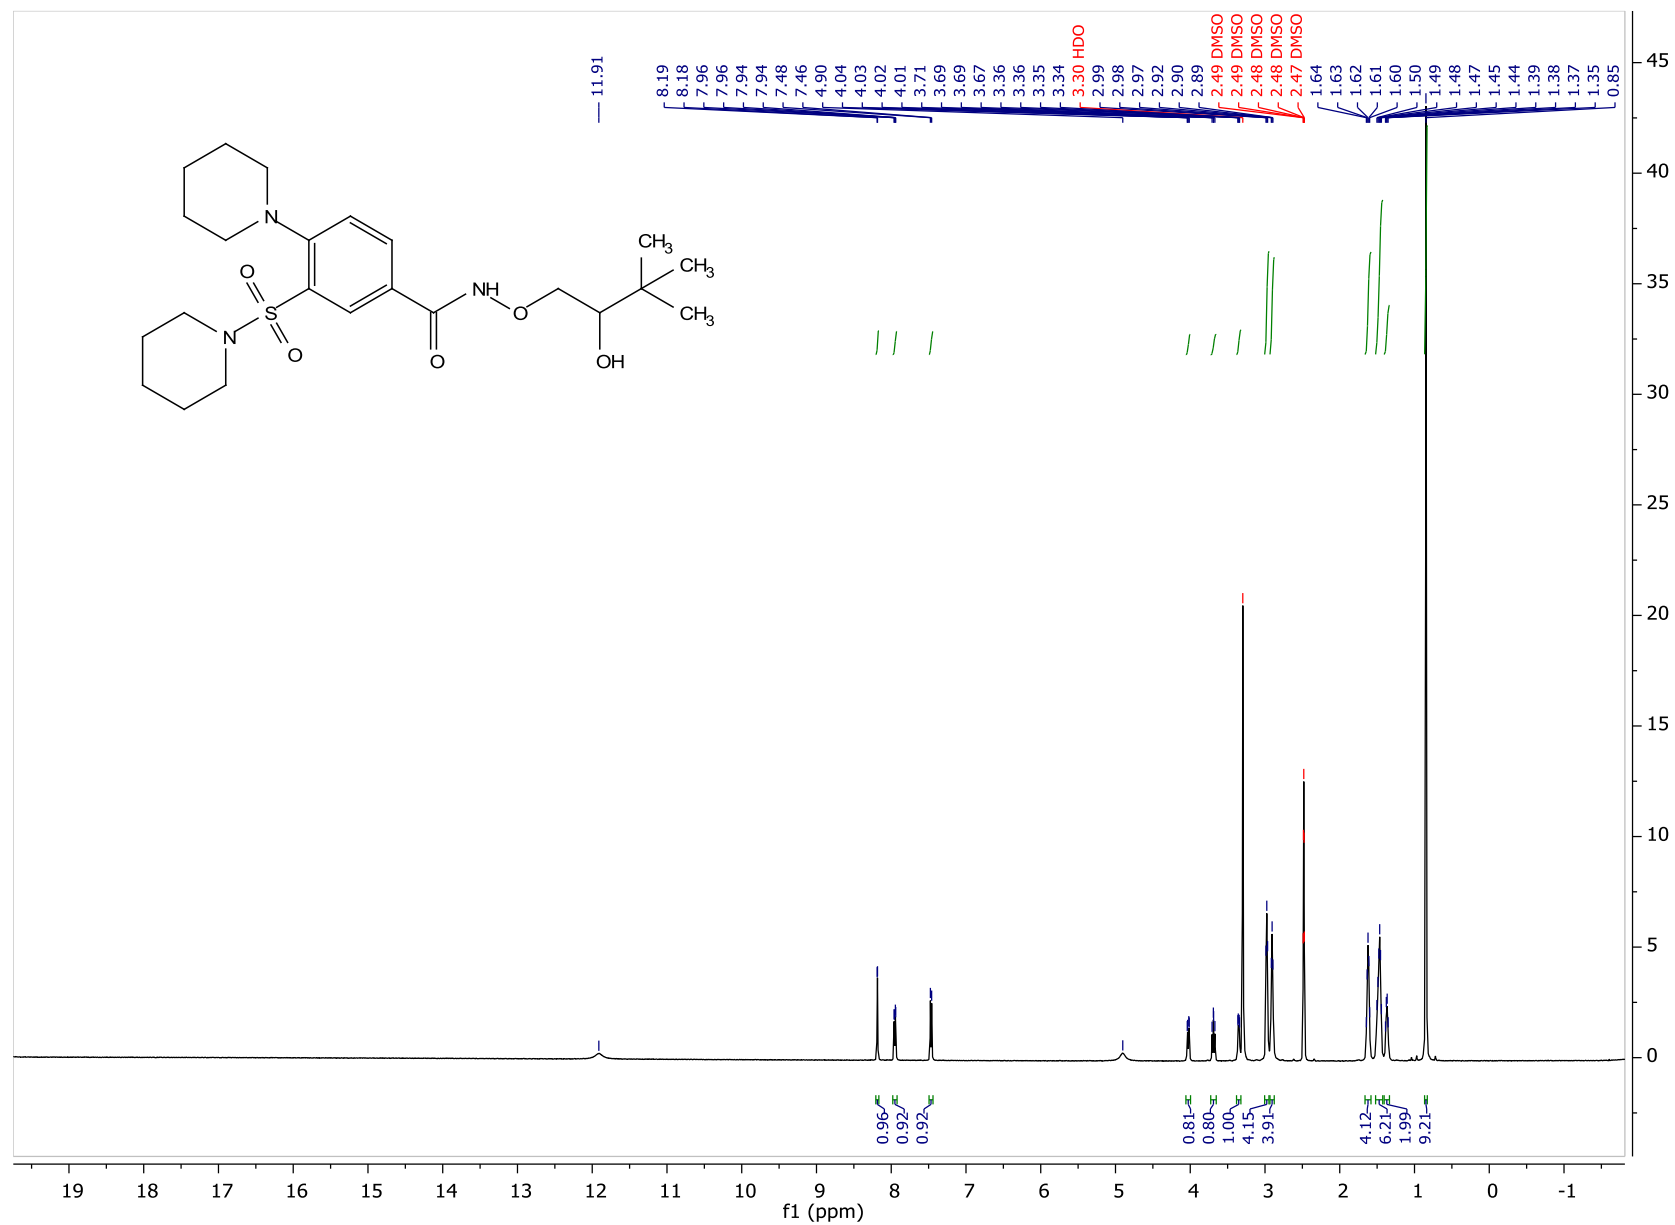

<sup>13</sup>C NMR spectrum of Z4886818449

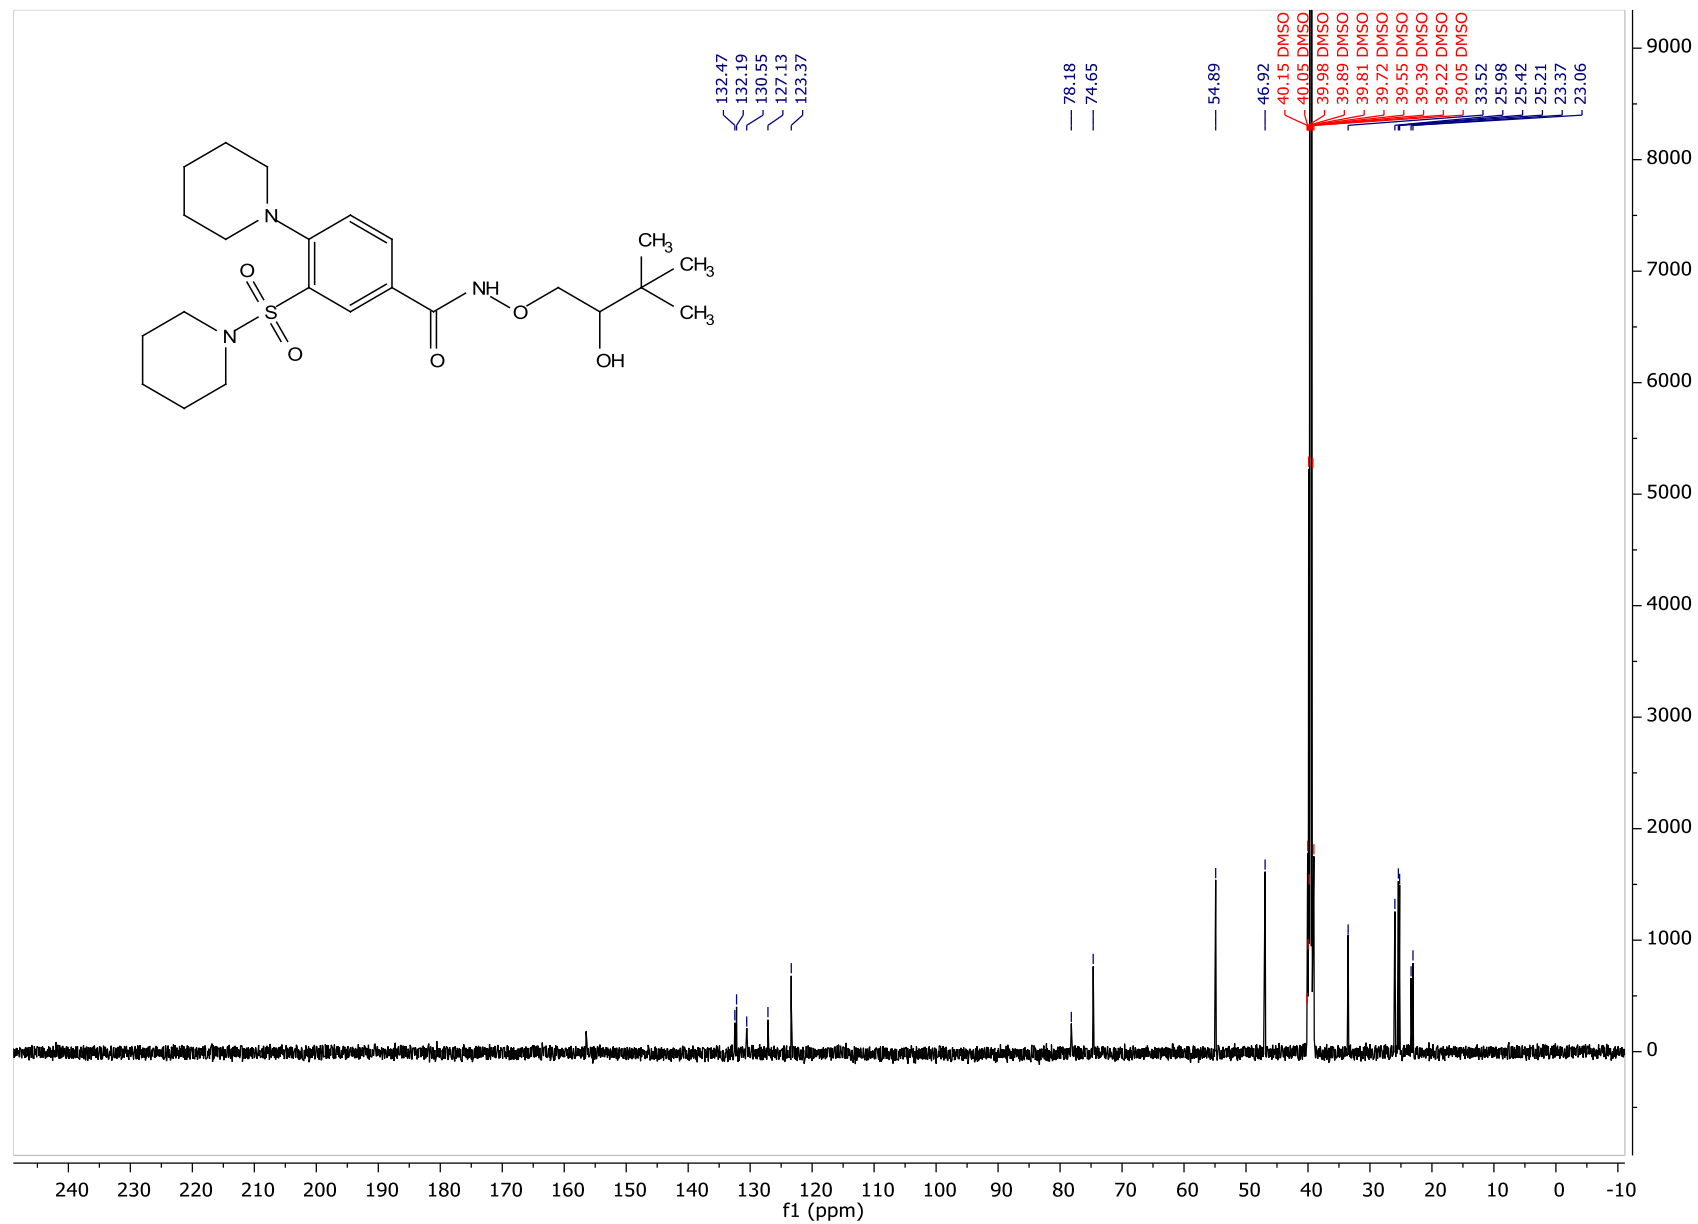

LC/MS spectrum of Z4886818449

Ret\_Time: 1.527 min

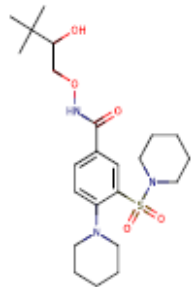

Mol Wt 467.62

Exact Mass 467.29

| # | Time  | Area%  |
|---|-------|--------|
| 1 | 1.527 | 100.00 |

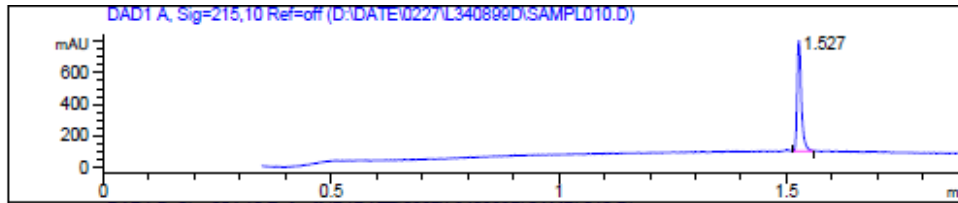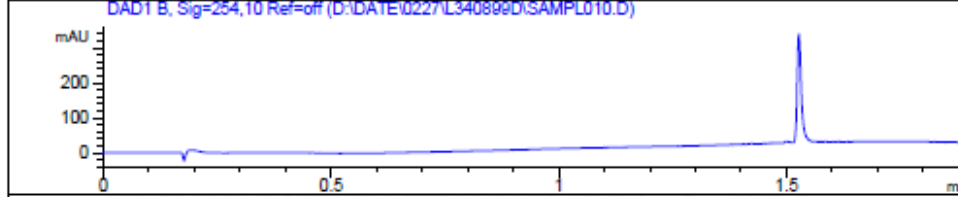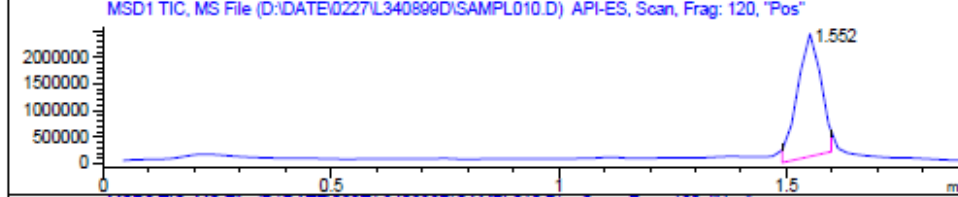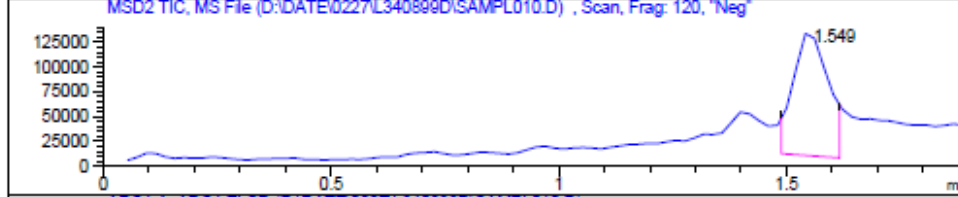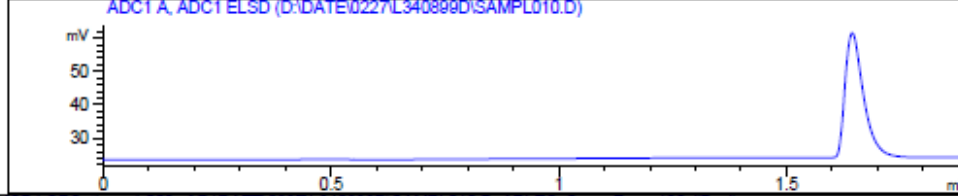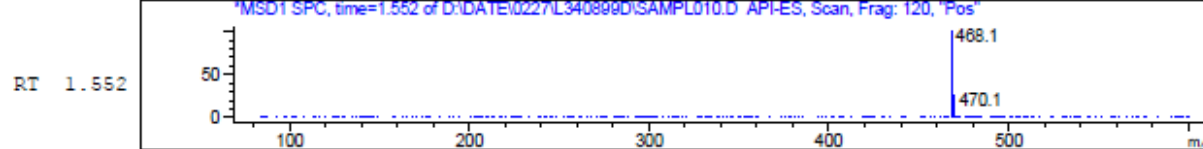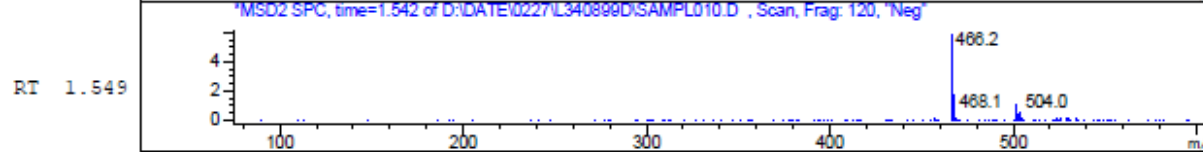

<sup>1</sup>H NMR spectrum of Z4886818455

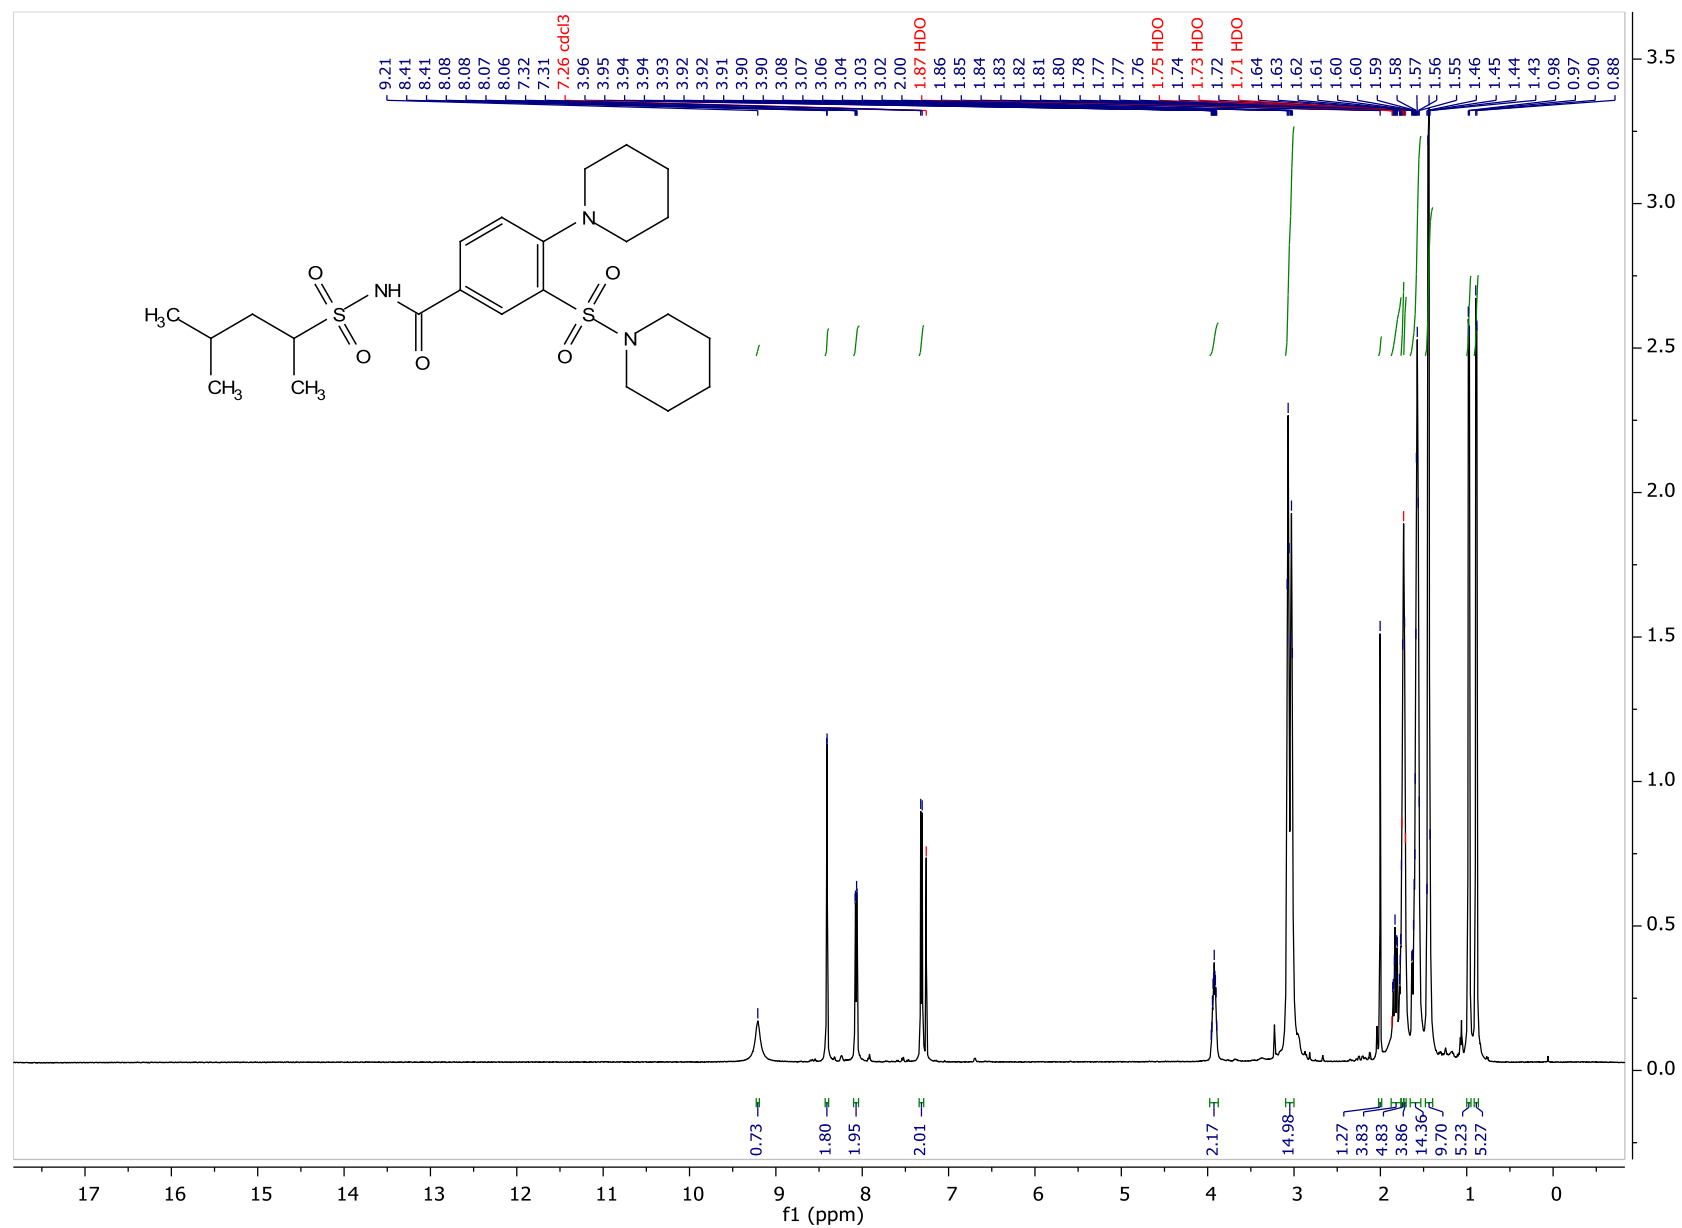

<sup>13</sup>C NMR spectrum of Z4886818455

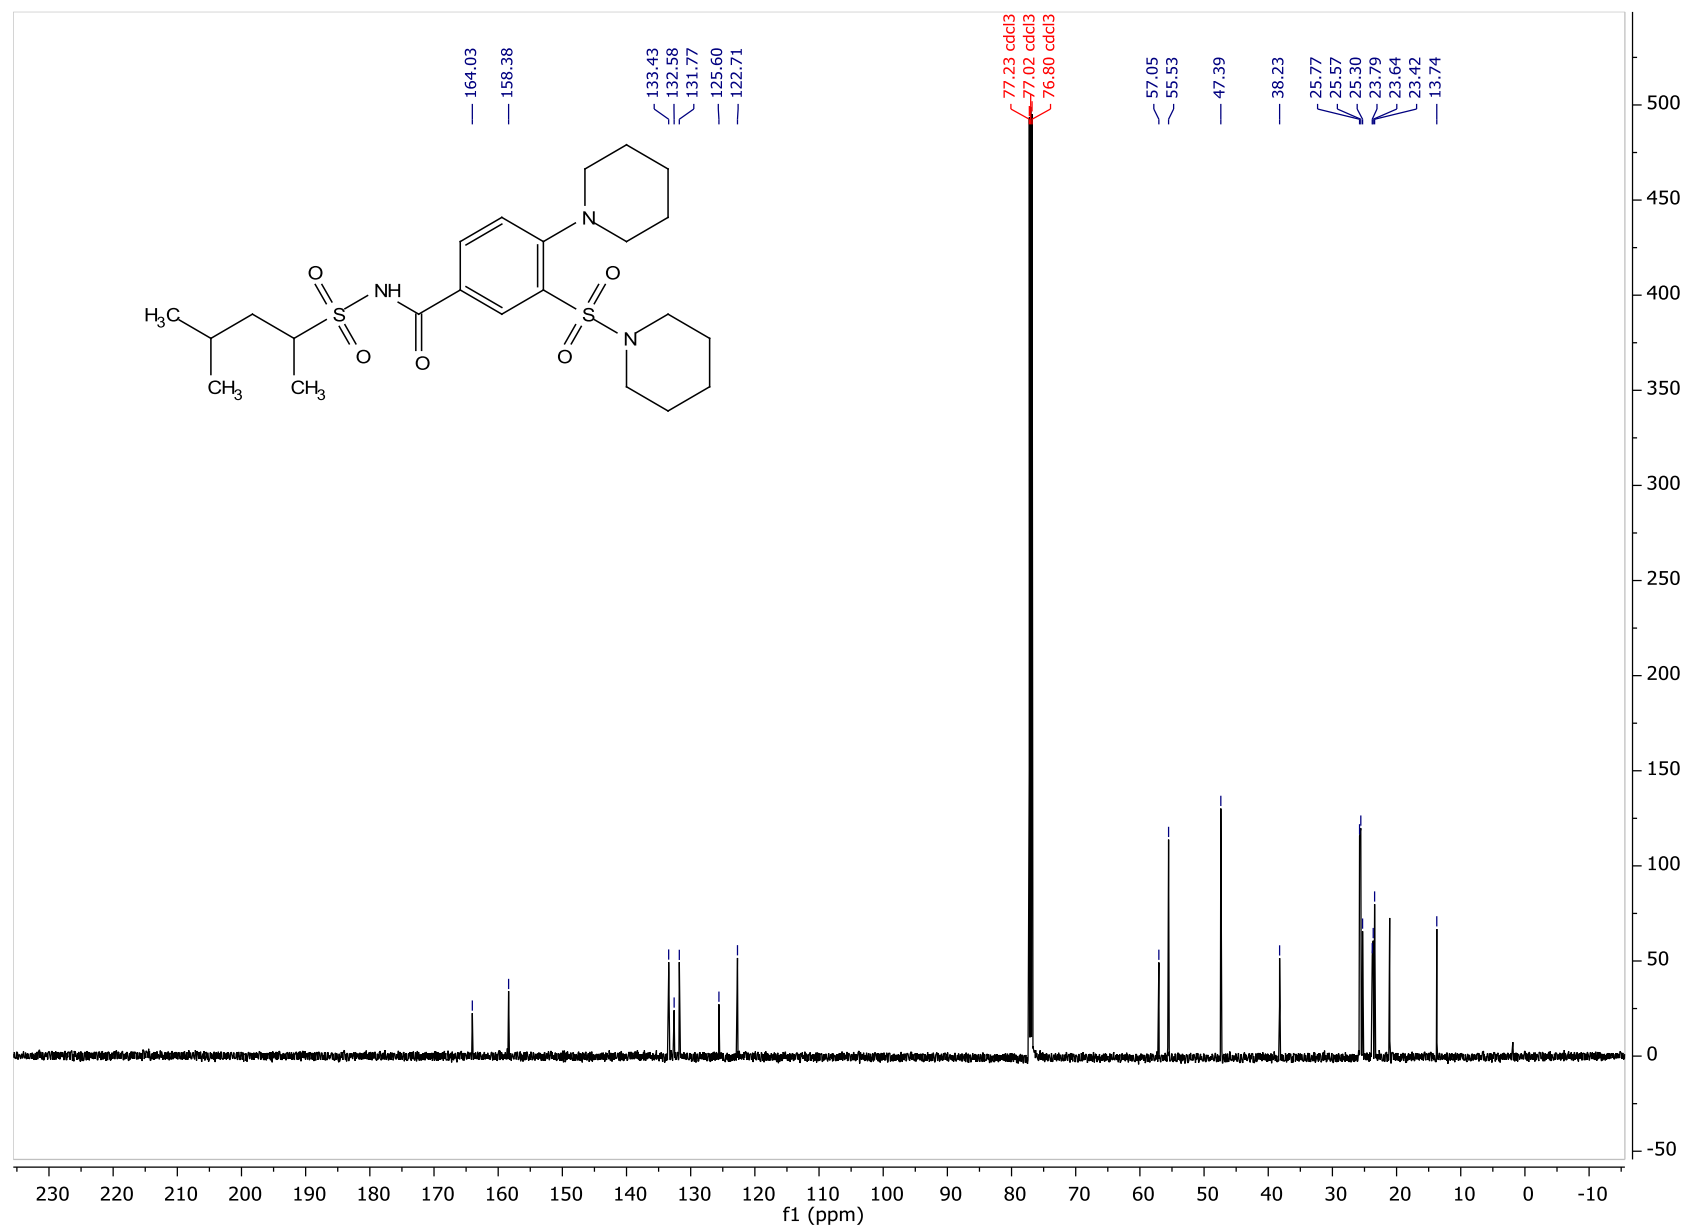



LC/MS spectrum of Z4886818455

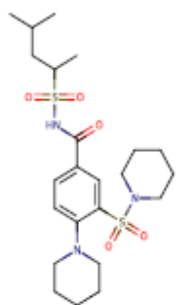

Mol Wt 499.69  
 Exact Mass 499.26

| # | Time  | Area%  |
|---|-------|--------|
| 1 | 1.564 | 100.00 |

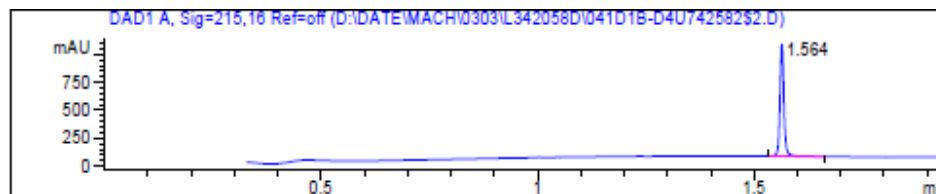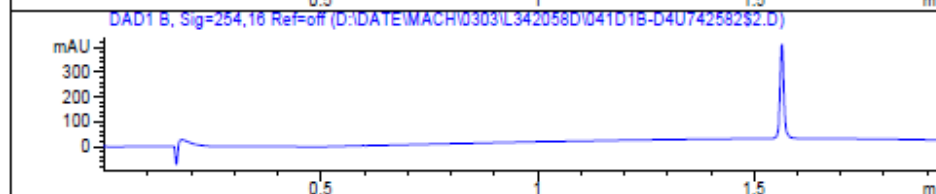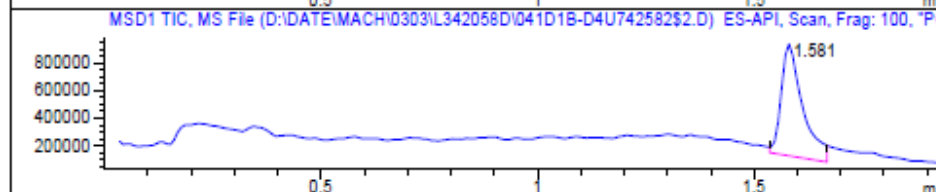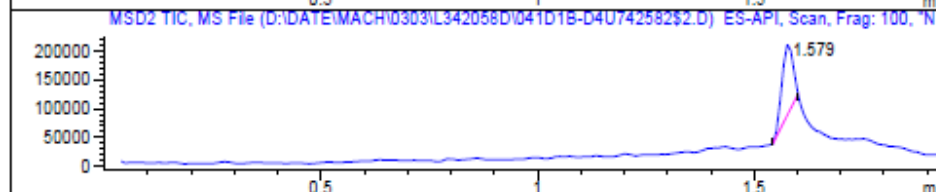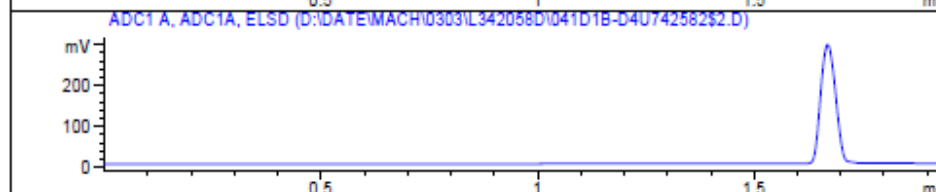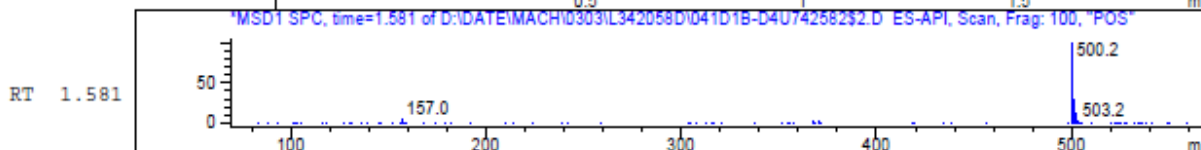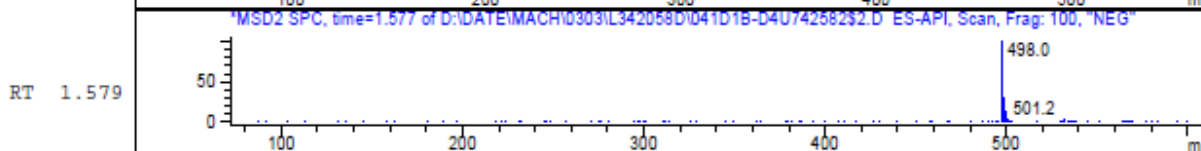

<sup>1</sup>H NMR spectrum of Z4886818480

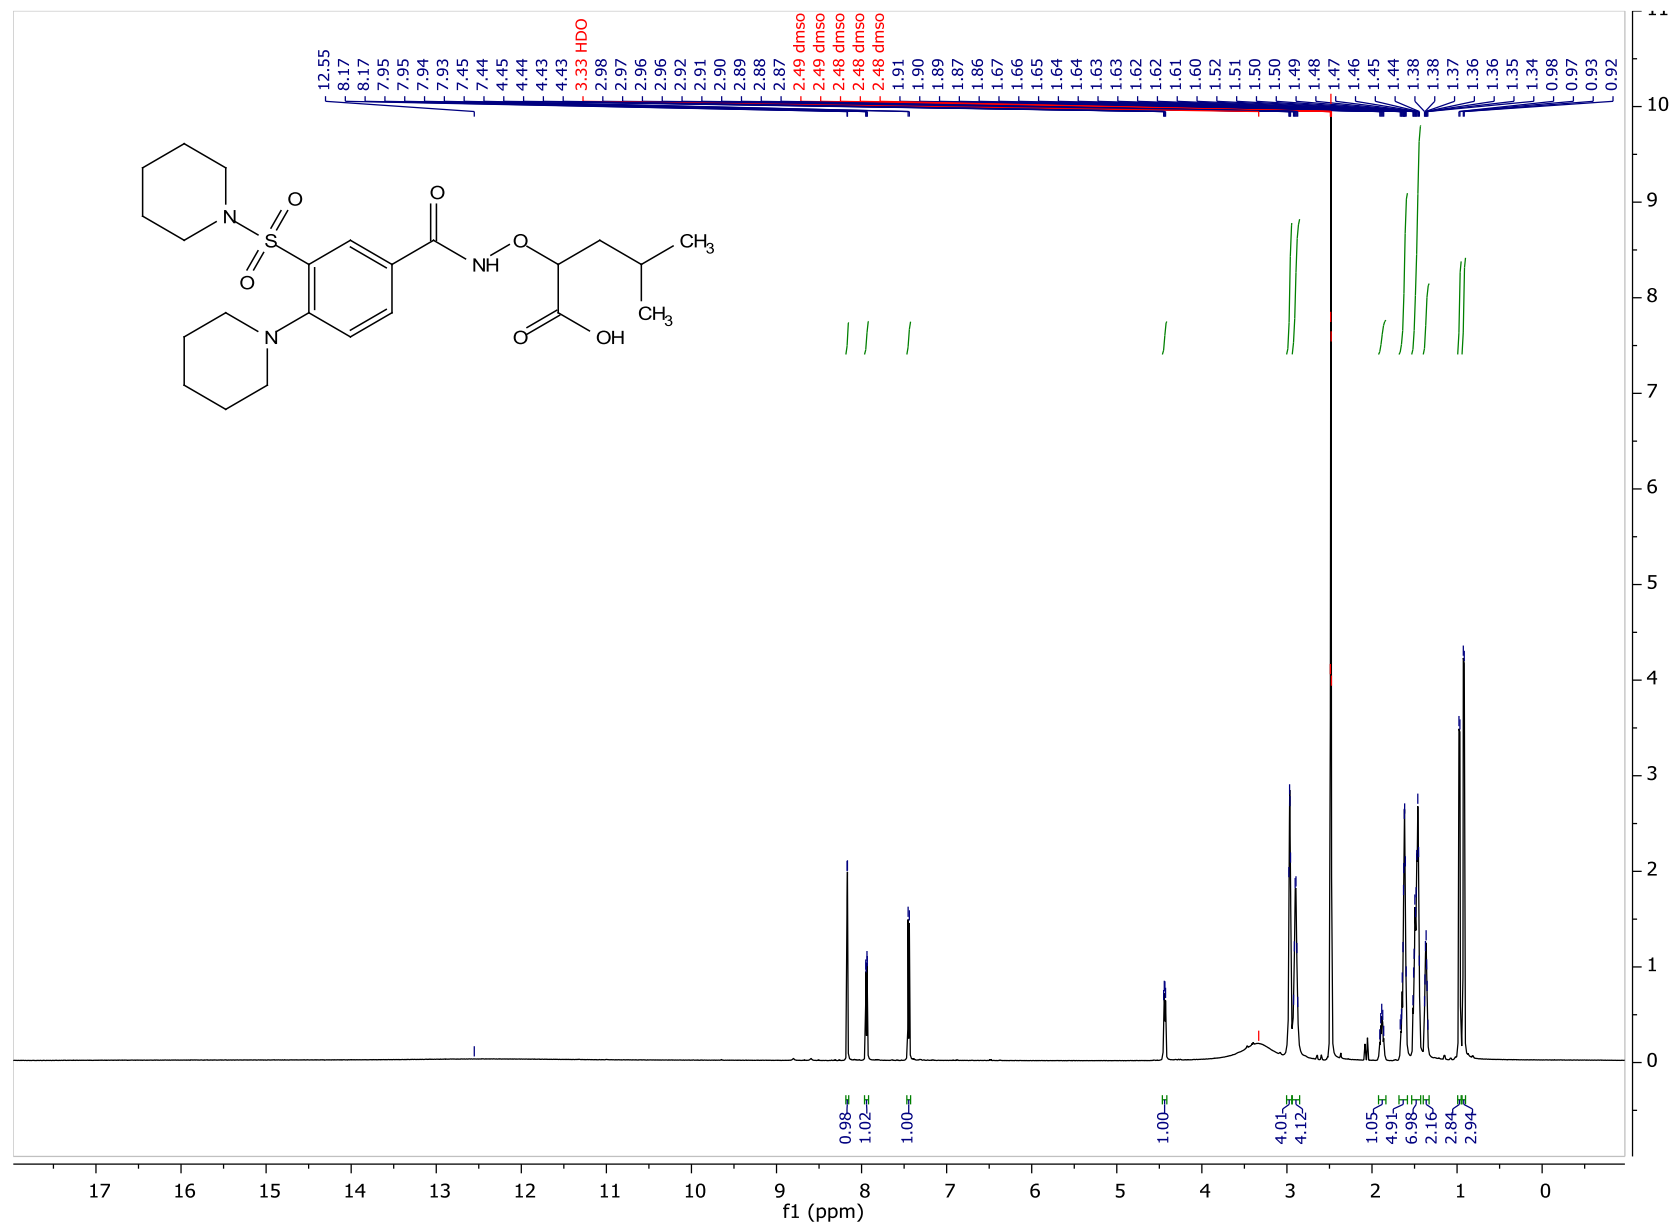

<sup>13</sup>C NMR spectrum of Z4886818480

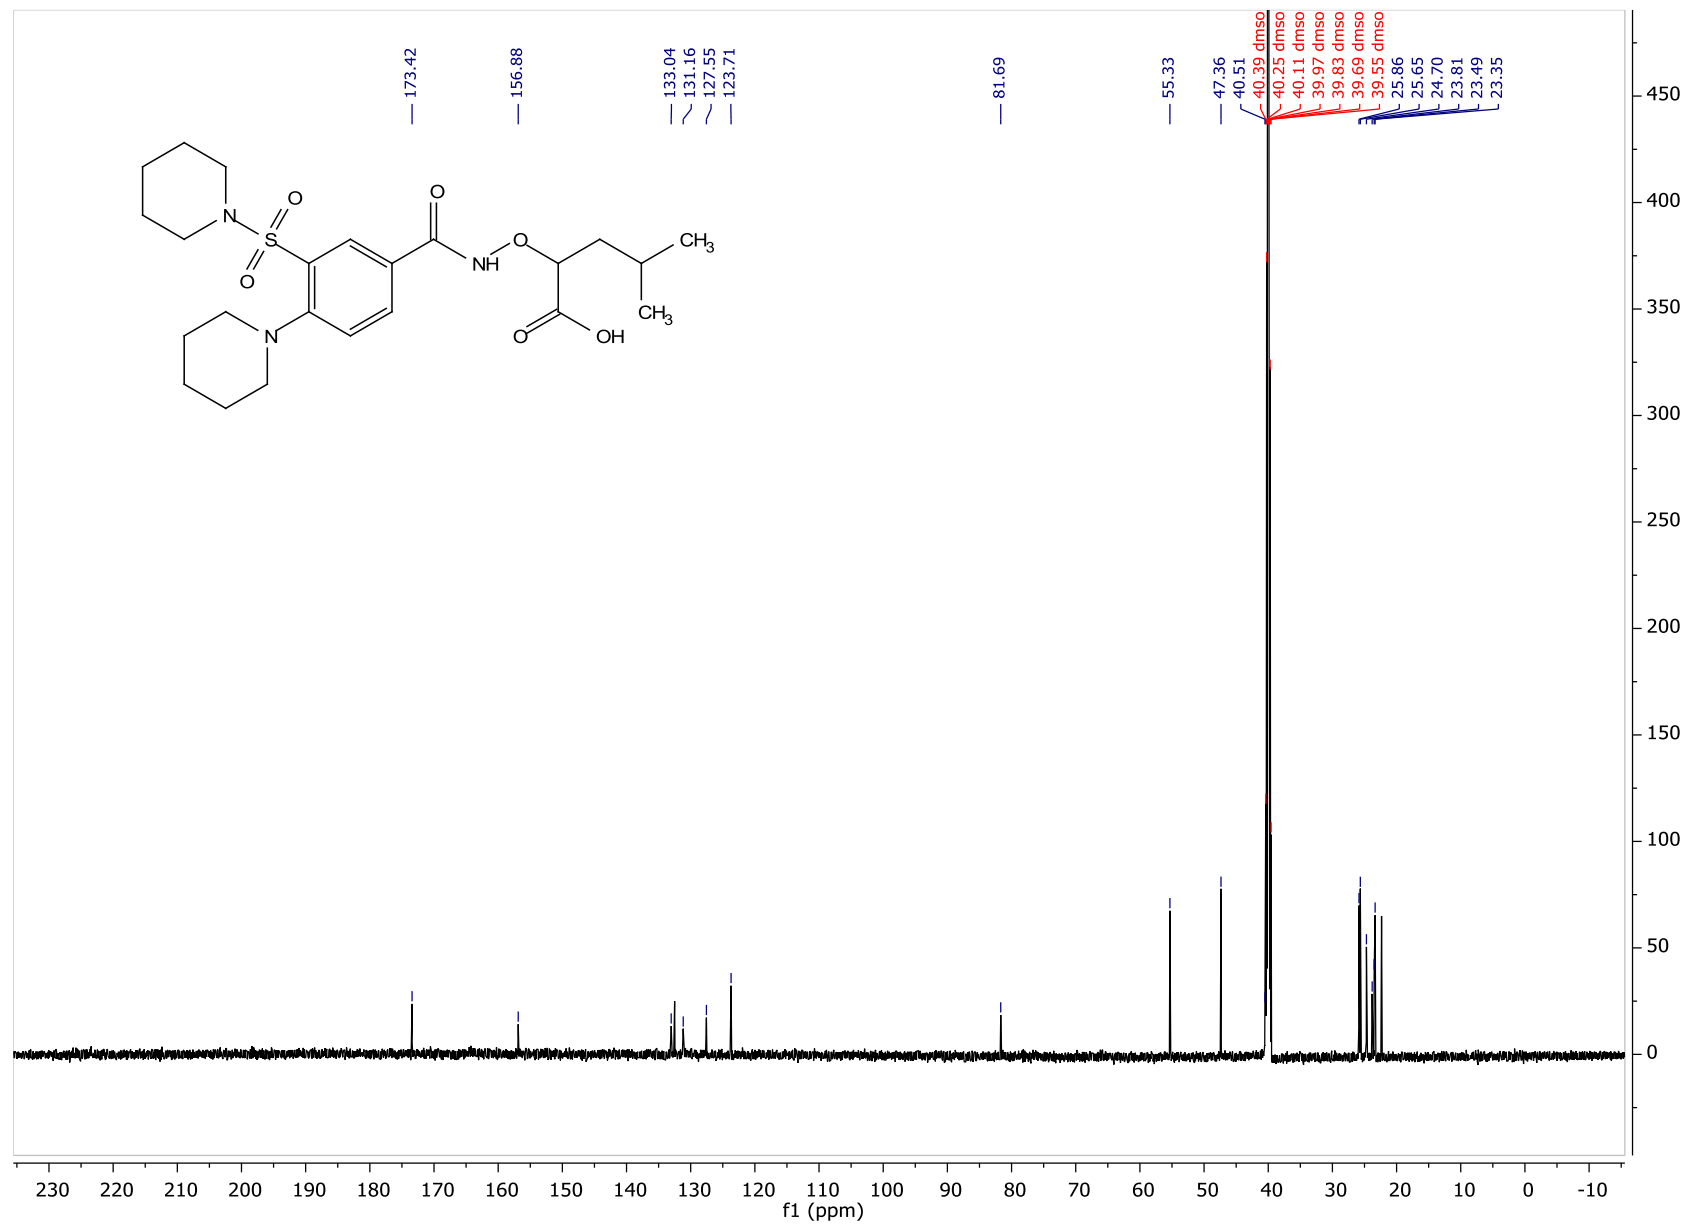

LC/MS spectrum of Z4886818480

Ret\_Time: 1.400 min

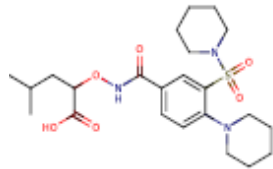

Mol Wt 481.61  
Exact Mass 481.26

| # | Time  | Area%  |
|---|-------|--------|
| 1 | 1.400 | 100.00 |

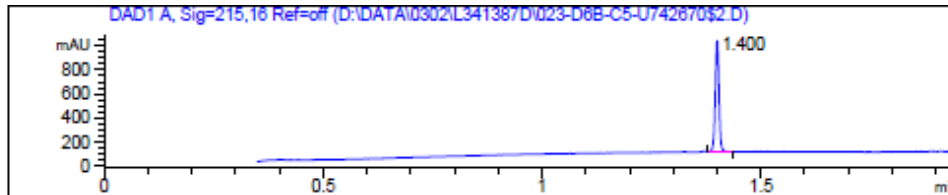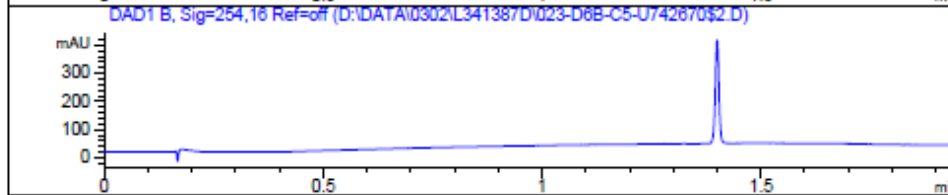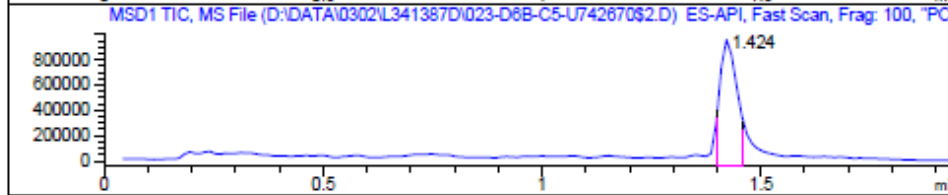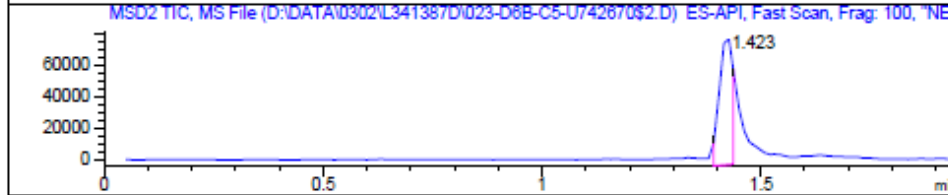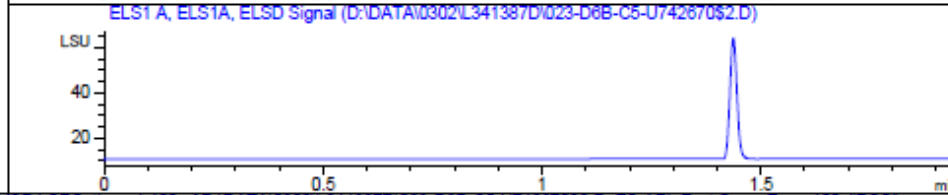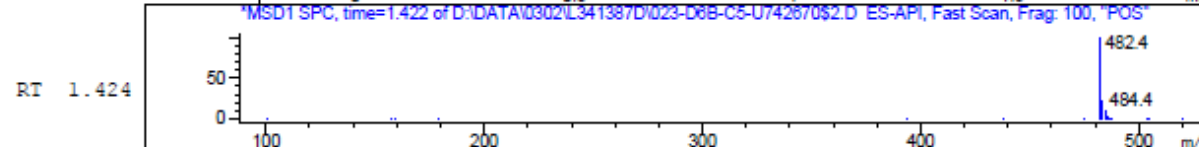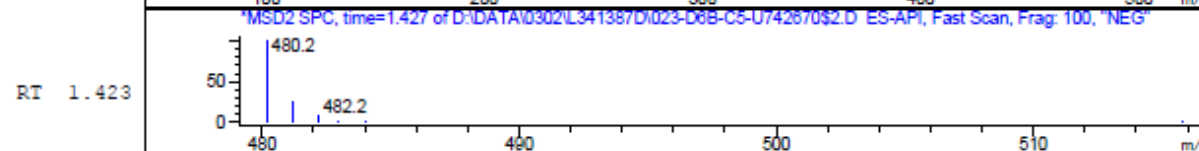

<sup>1</sup>H NMR spectrum of Z4886818501

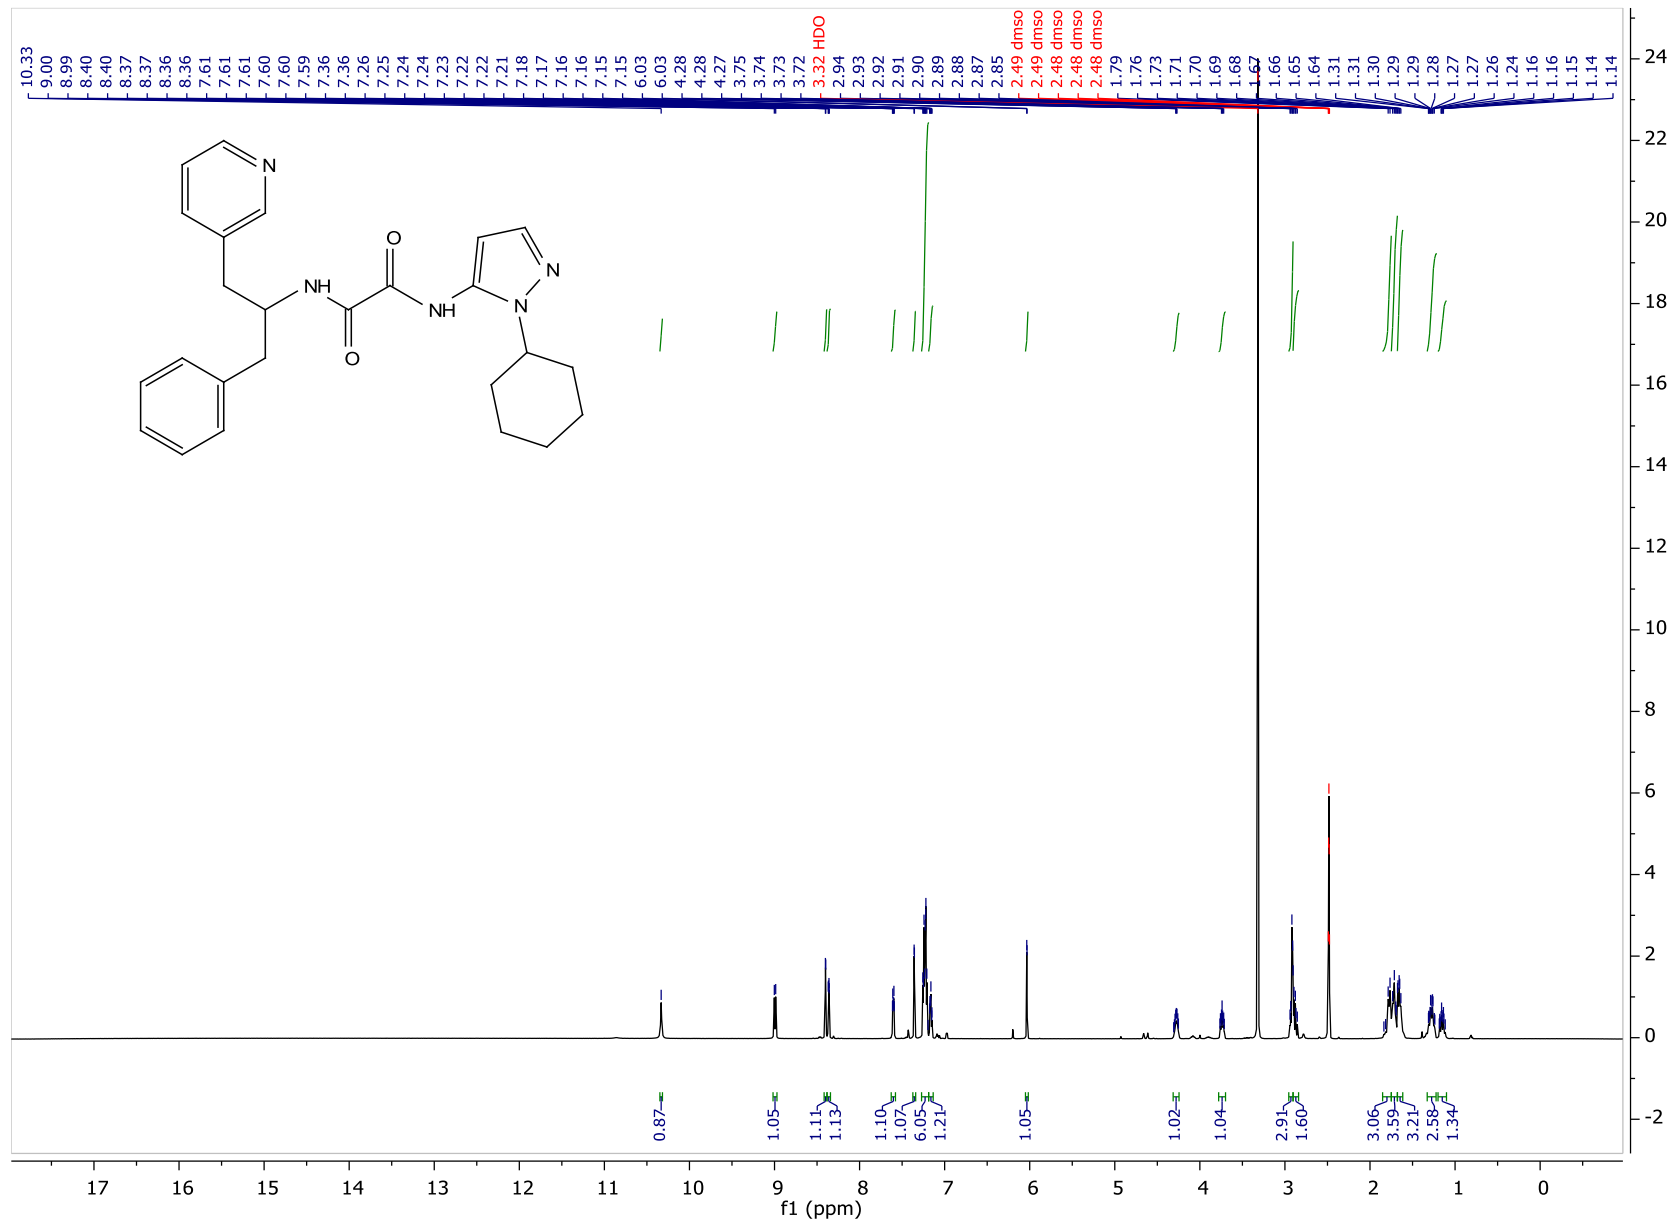

<sup>13</sup>C NMR spectrum of Z4886818501

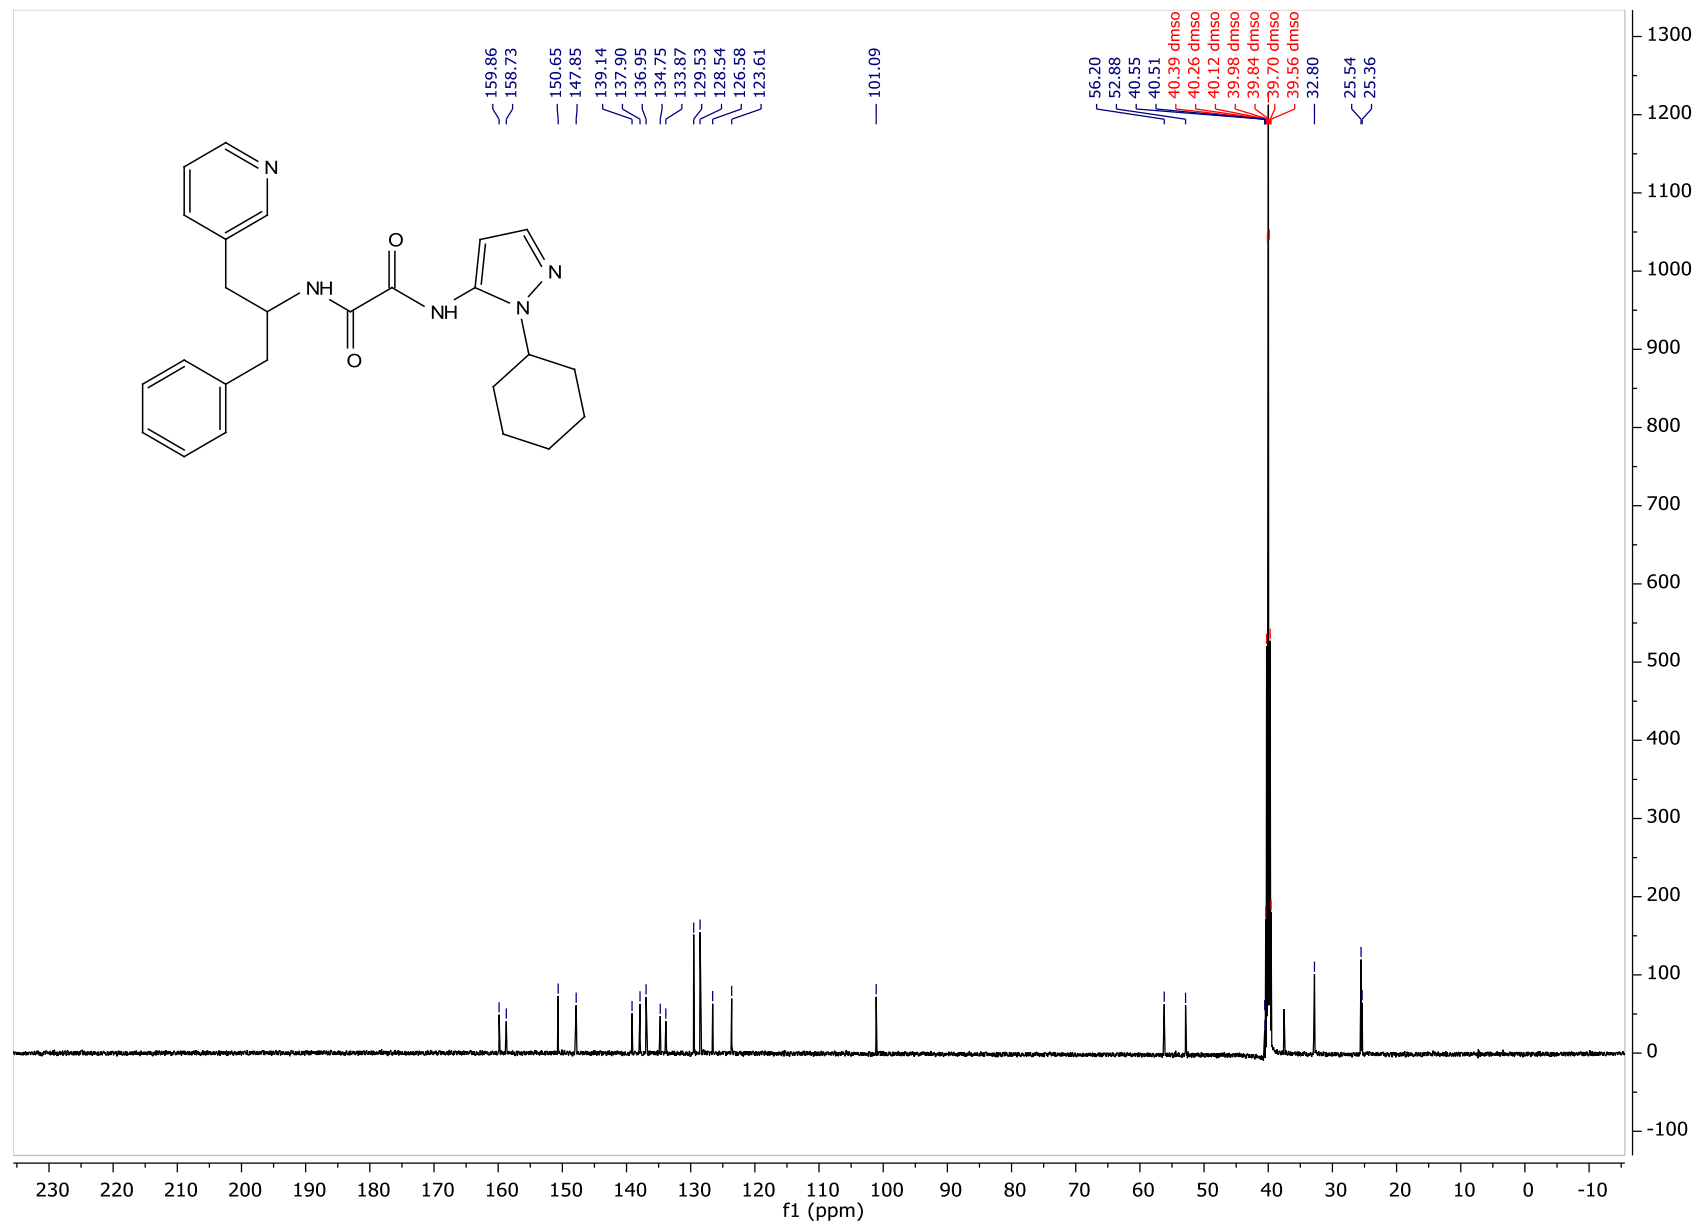

LC/MS spectrum of Z4886818501

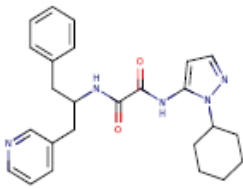

Mol Wt 431.53  
Exact Mass 431.27

| # | Time  | Area% |
|---|-------|-------|
| 1 | 0.955 | 96.14 |
| 2 | 1.199 | 3.86  |

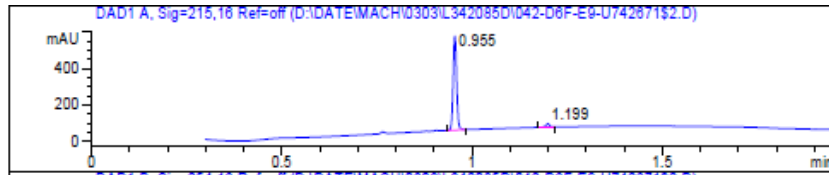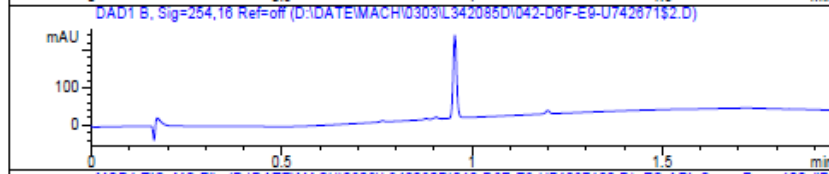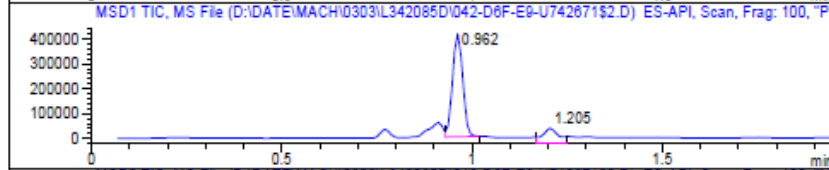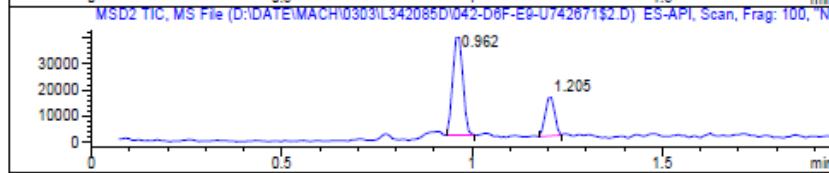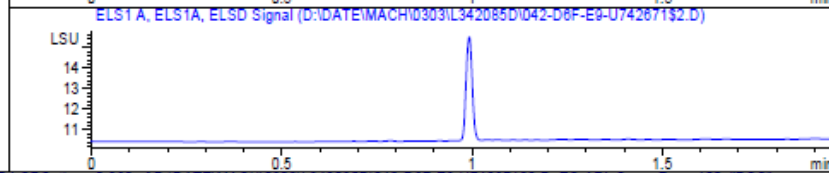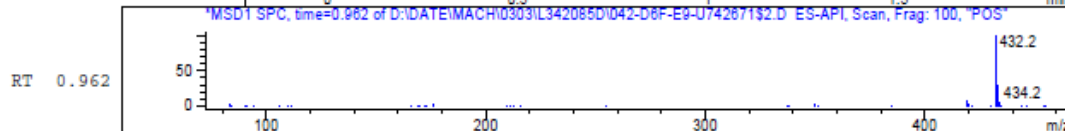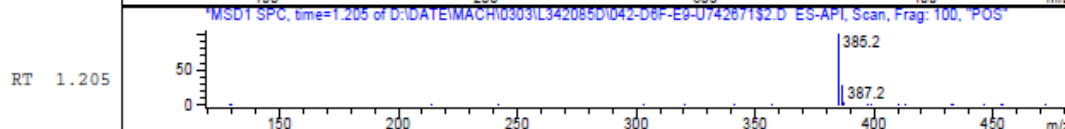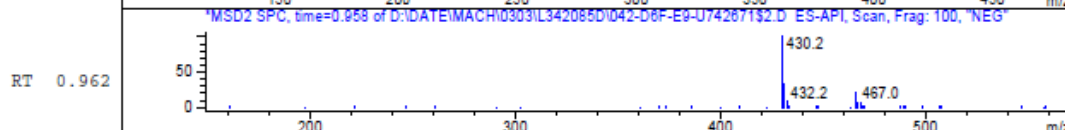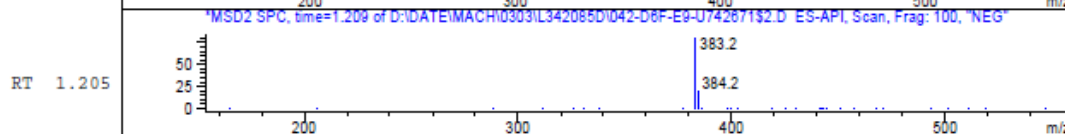

<sup>1</sup>H NMR spectrum of Z4886818507

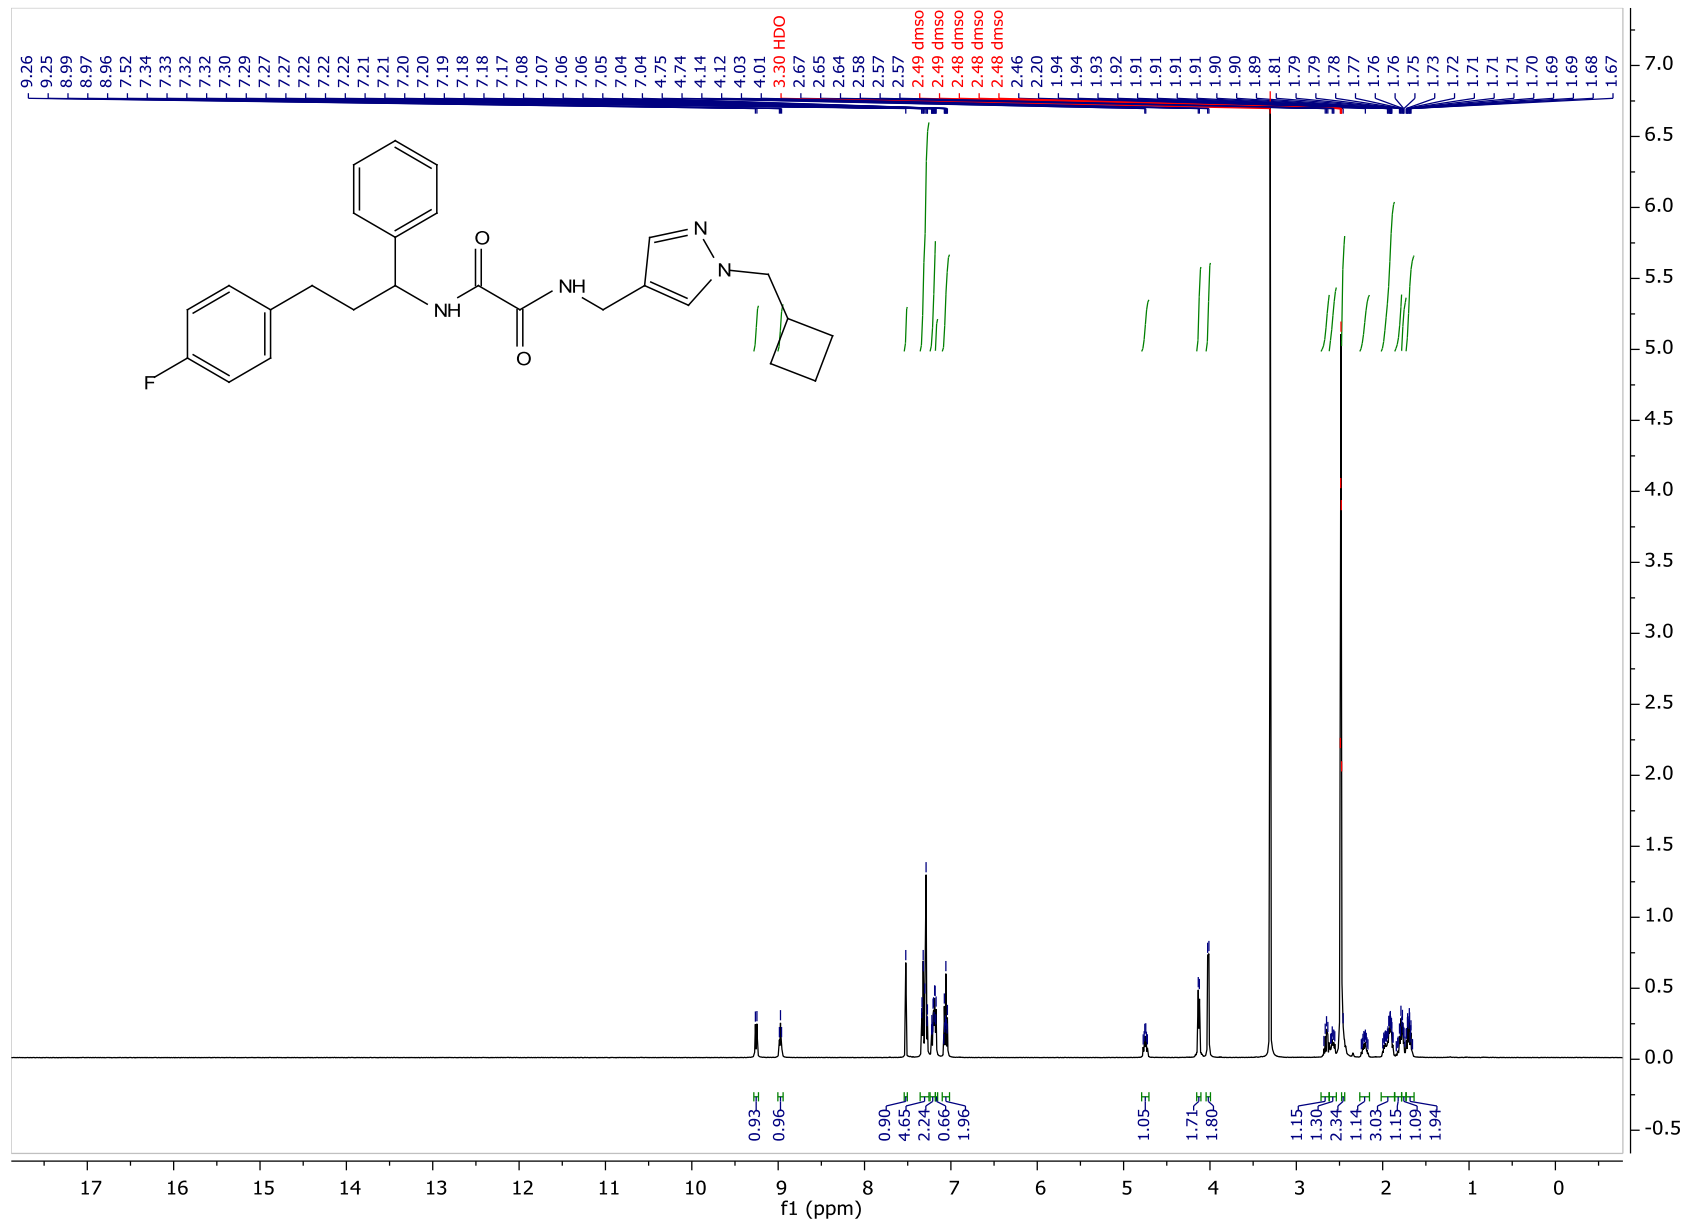



LC/MS spectrum of Z4886818507

Ret\_Time: 1.345 min

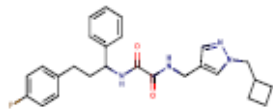

Mol Wt 448.53  
Exact Mass 448.27

| # | Time  | Area%  |
|---|-------|--------|
| 1 | 1.345 | 100.00 |

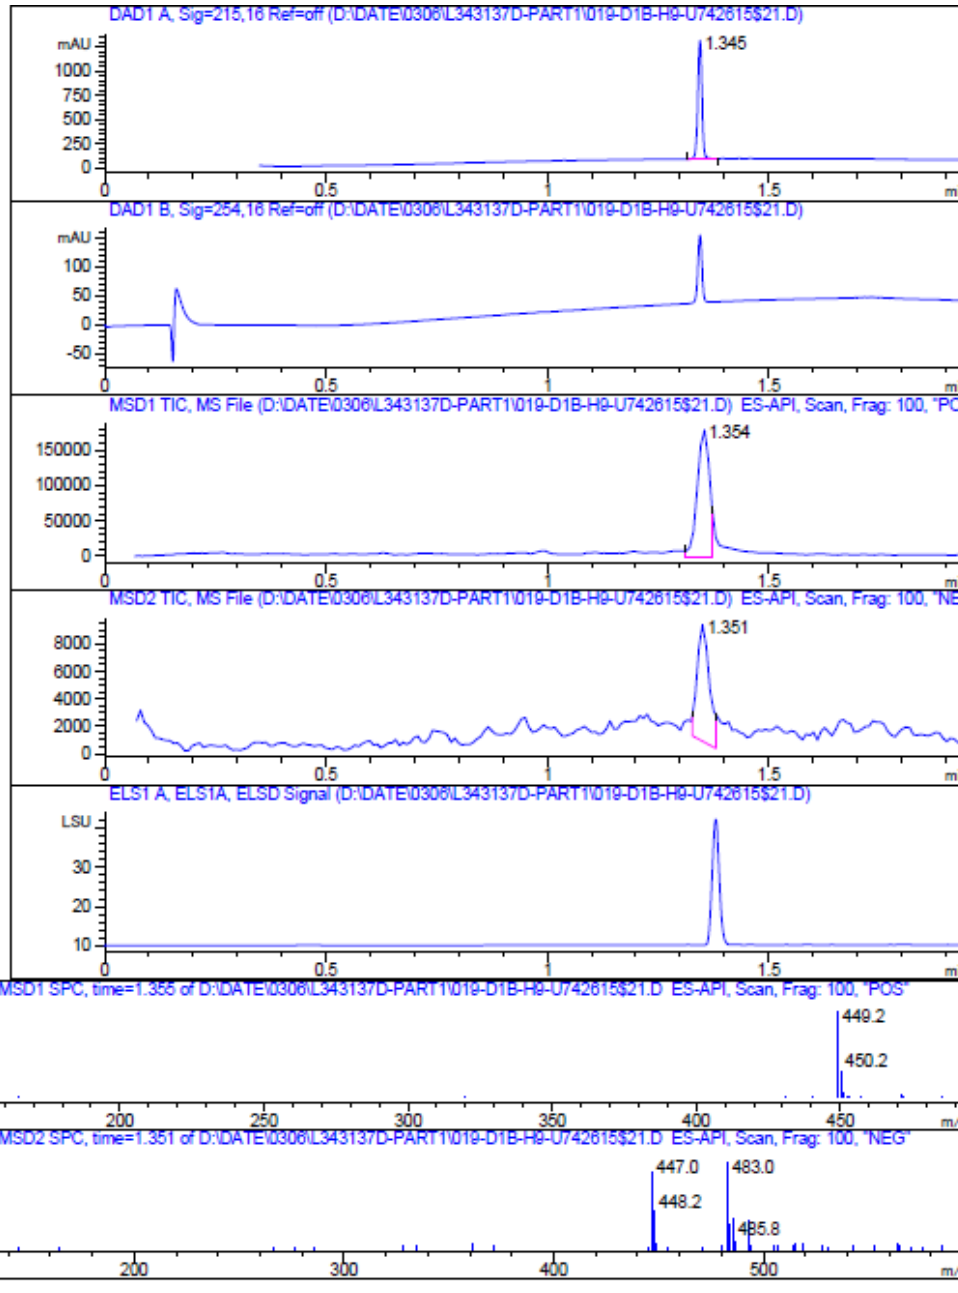

RT 1.354

RT 1.351

<sup>1</sup>H NMR spectrum of Z4886818523

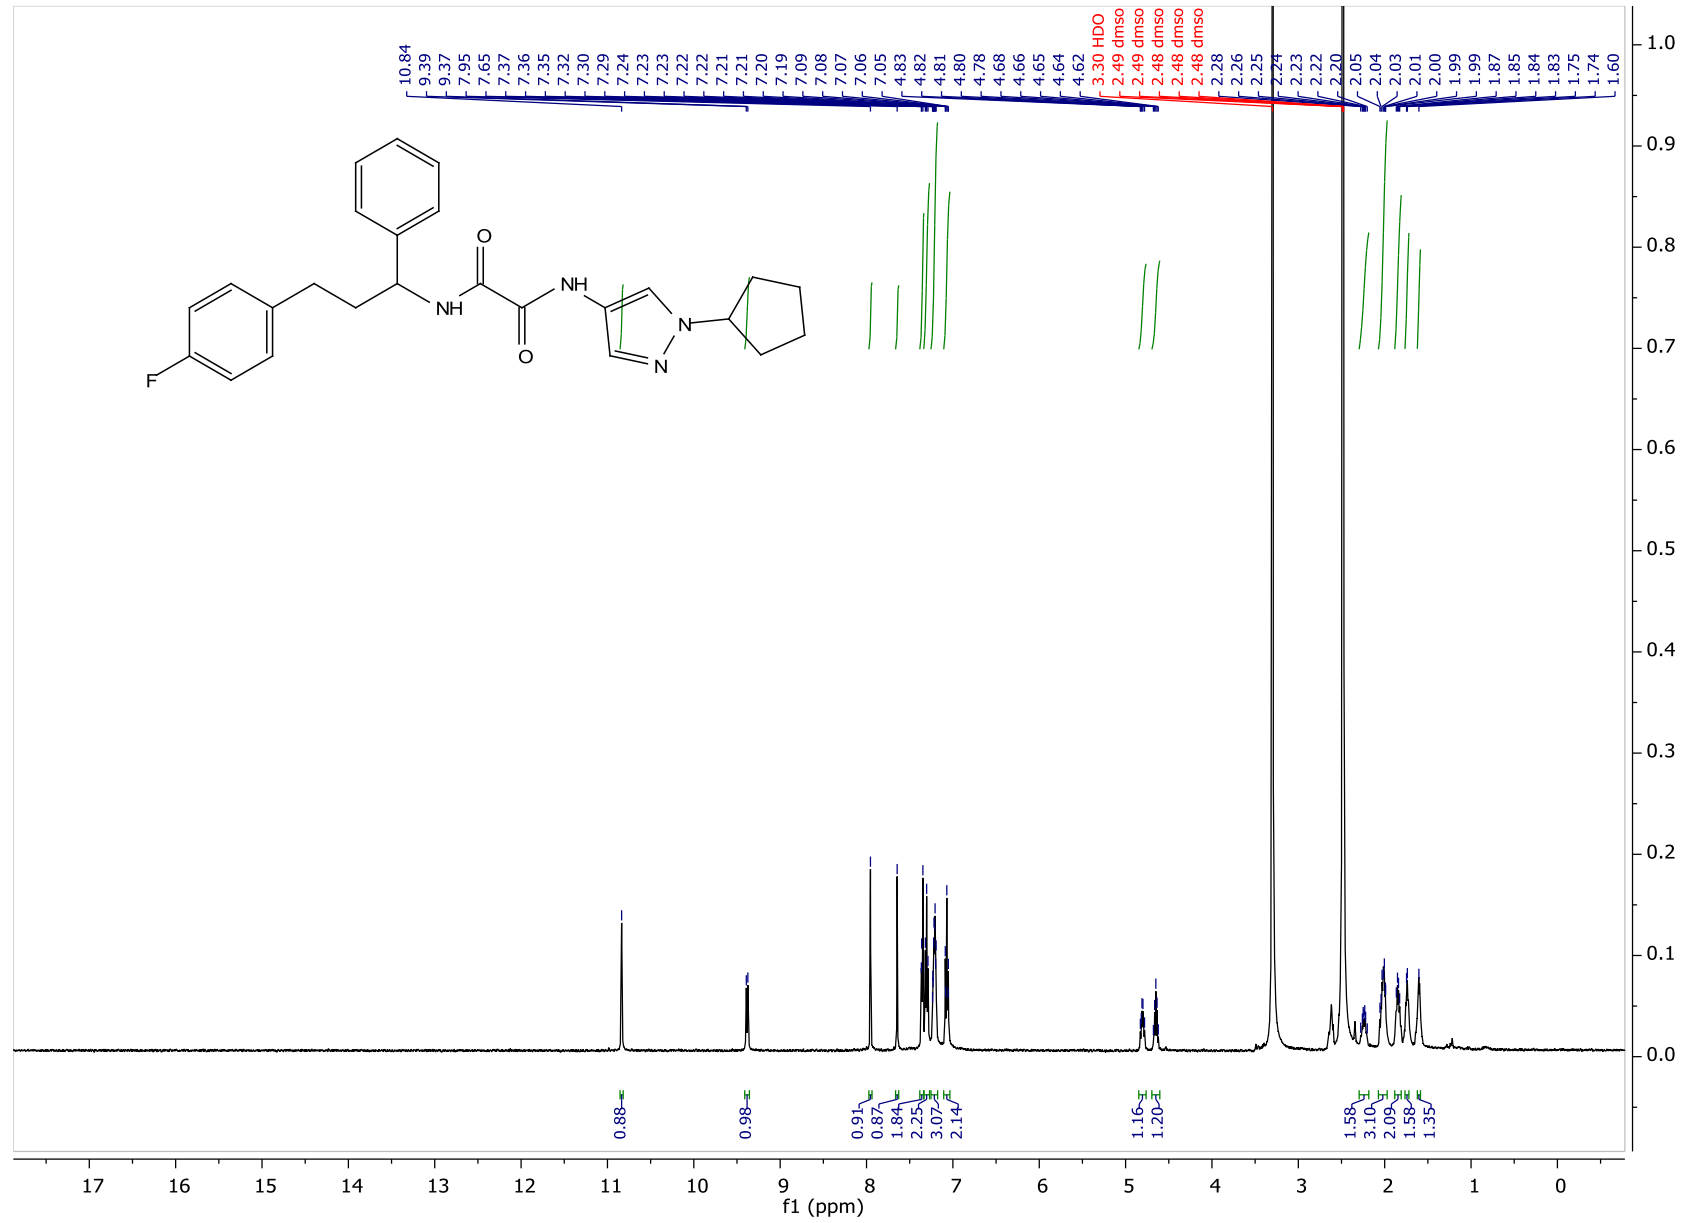

LC/MS spectrum of Z4886818523

Ret\_Time: 1.570 min

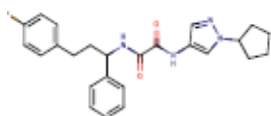

Mol Wt 434.51

Exact Mass 434.25

| # | Time  | Area%  |
|---|-------|--------|
| 1 | 1.570 | 100.00 |

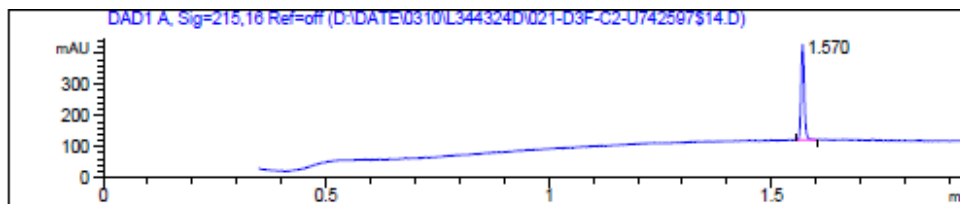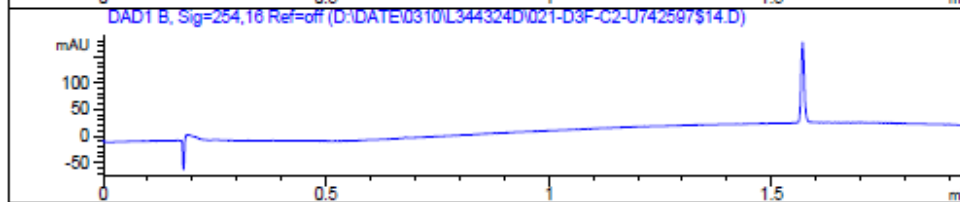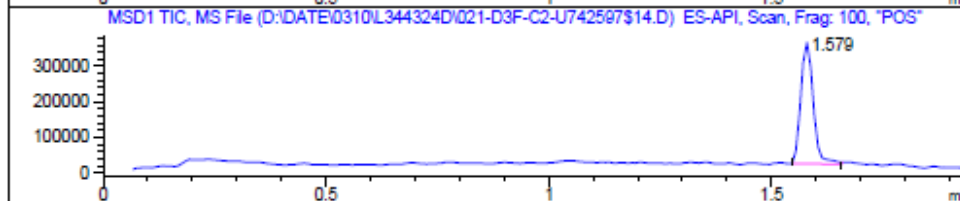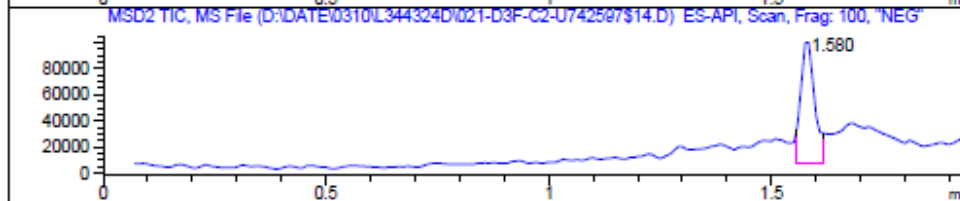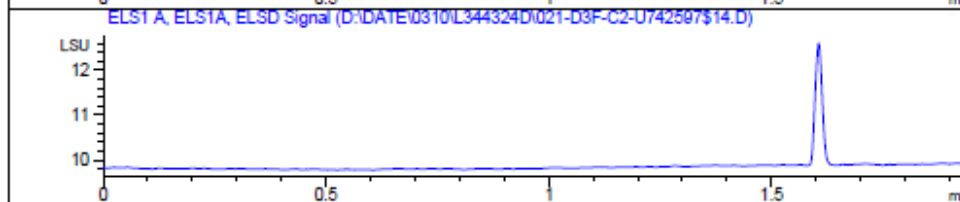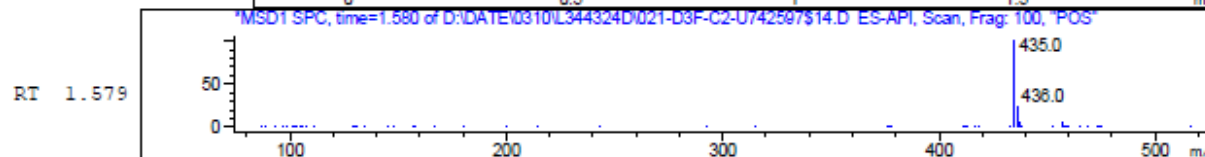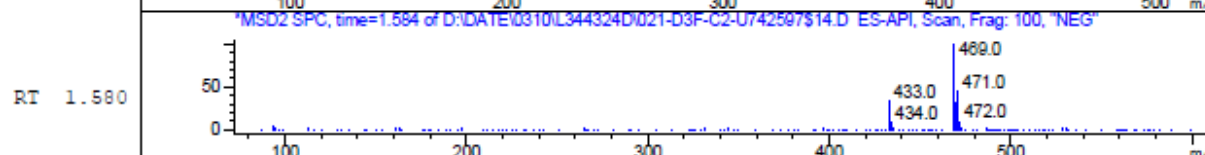

<sup>1</sup>H NMR spectrum of Z4886818552

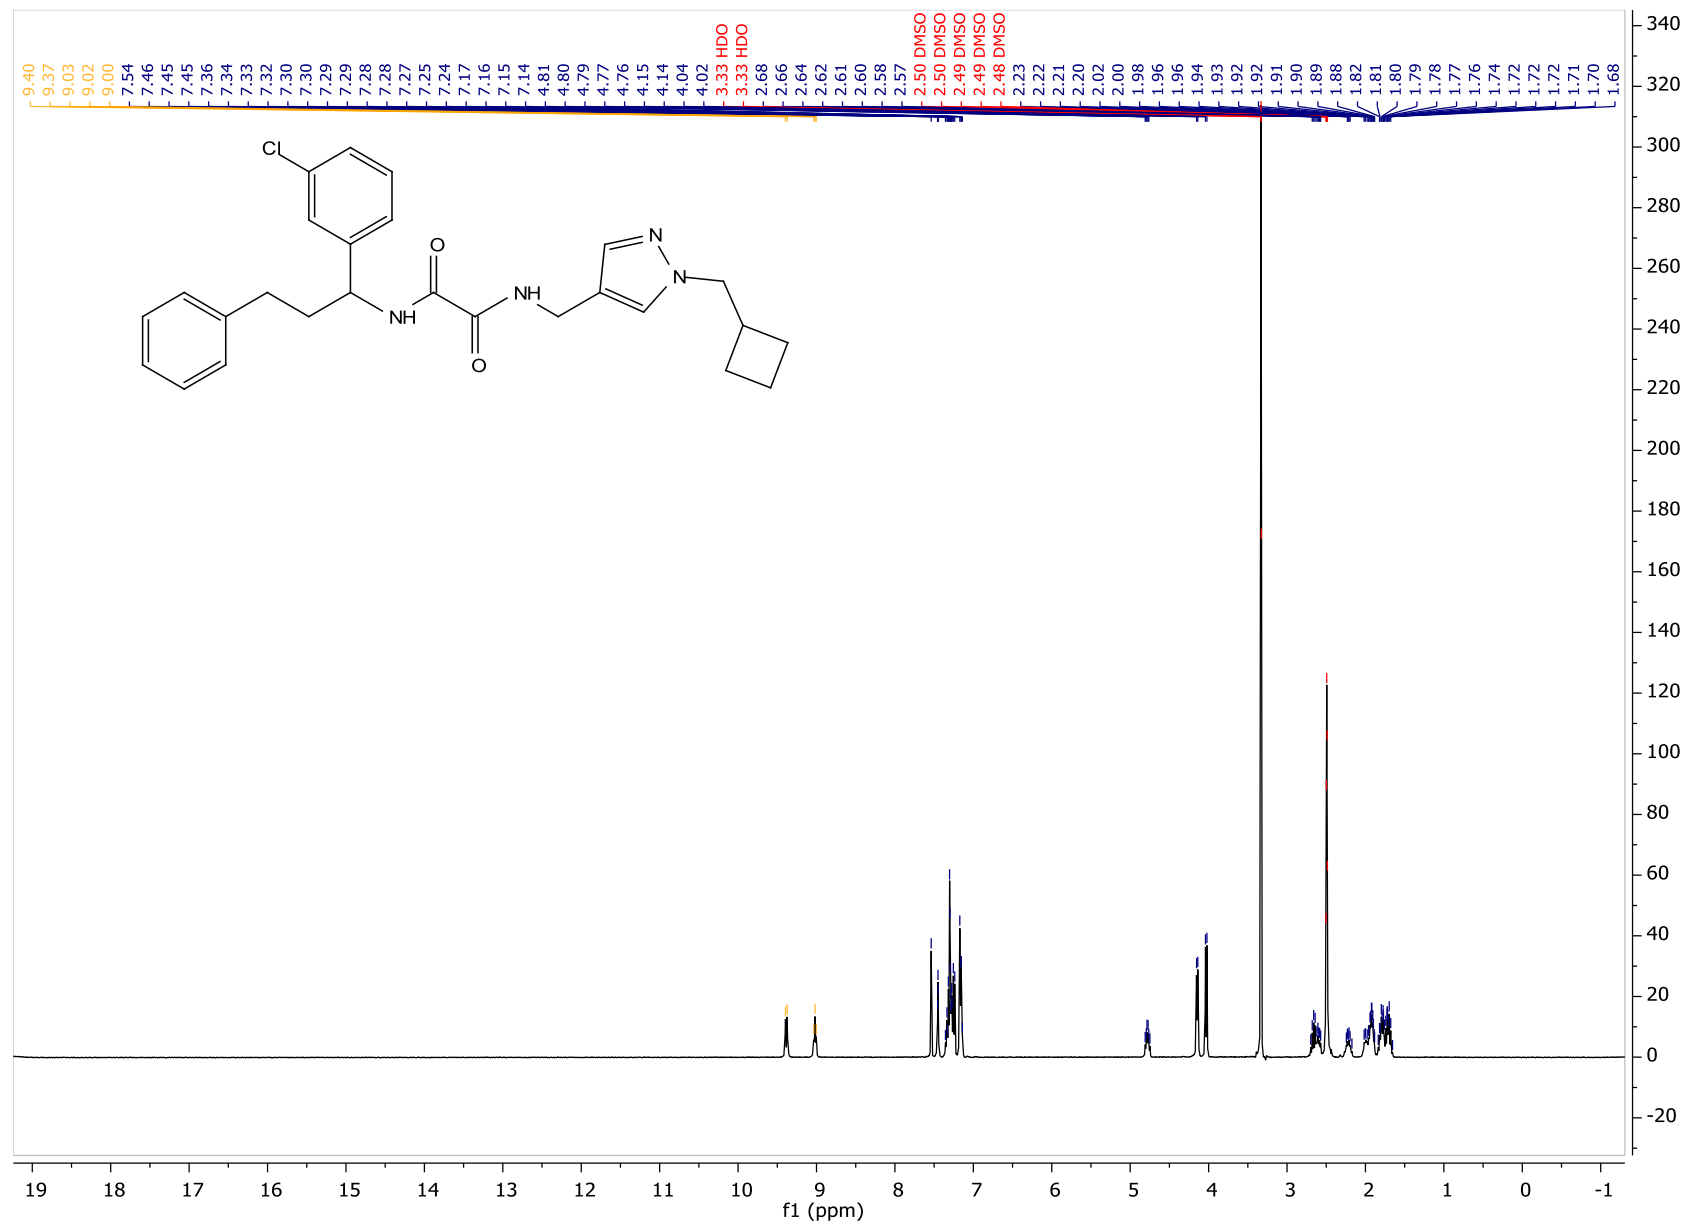

<sup>13</sup>C NMR spectrum of Z4886818552

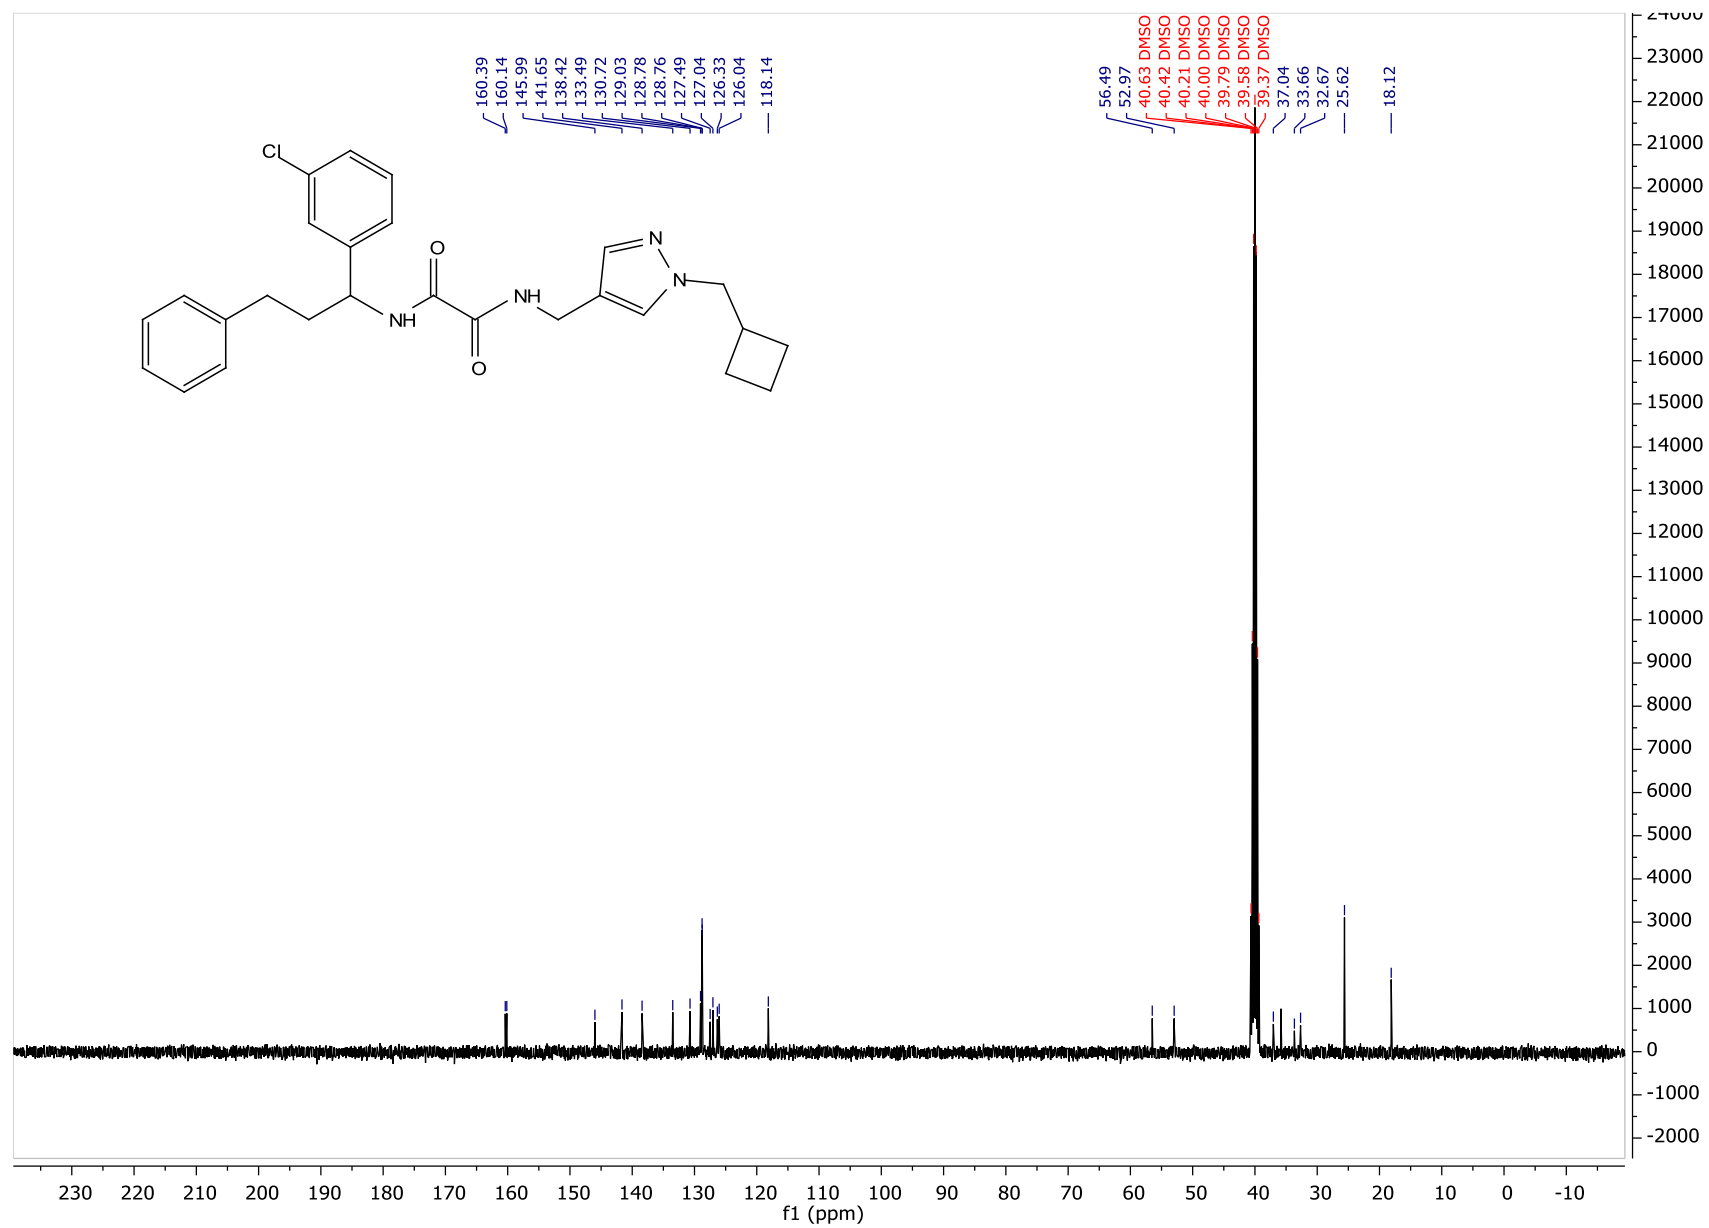

LC/MS spectrum of Z4886818552

Ret\_Time: 1.390 min

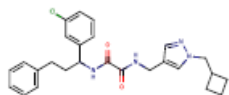

Mol Wt 464.99  
Exact Mass 464.24

| # | Time  | Area% |
|---|-------|-------|
| 1 | 1.129 | 0.78  |
| 2 | 1.390 | 97.31 |
| 3 | 1.577 | 1.91  |

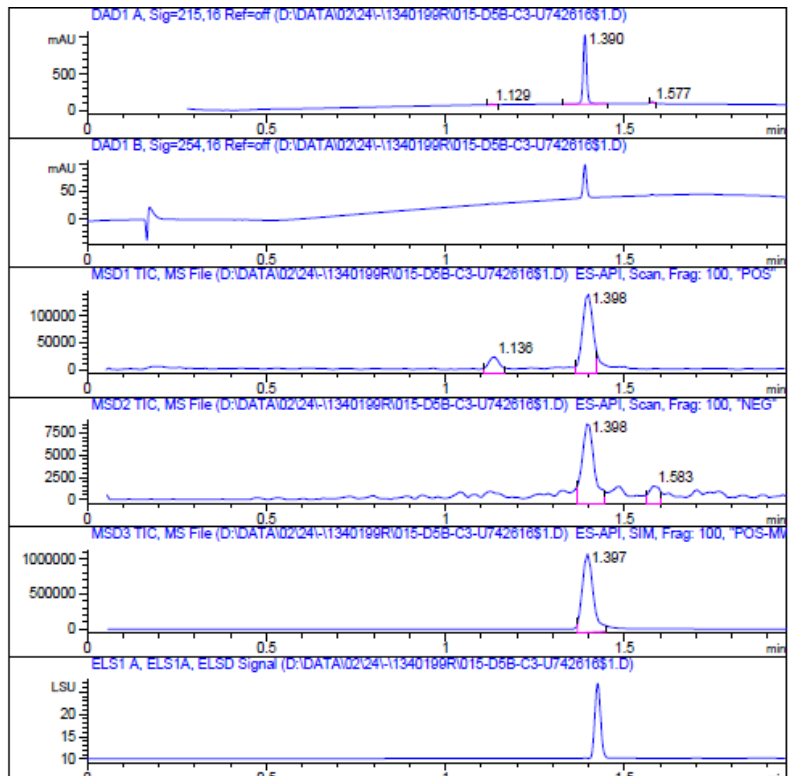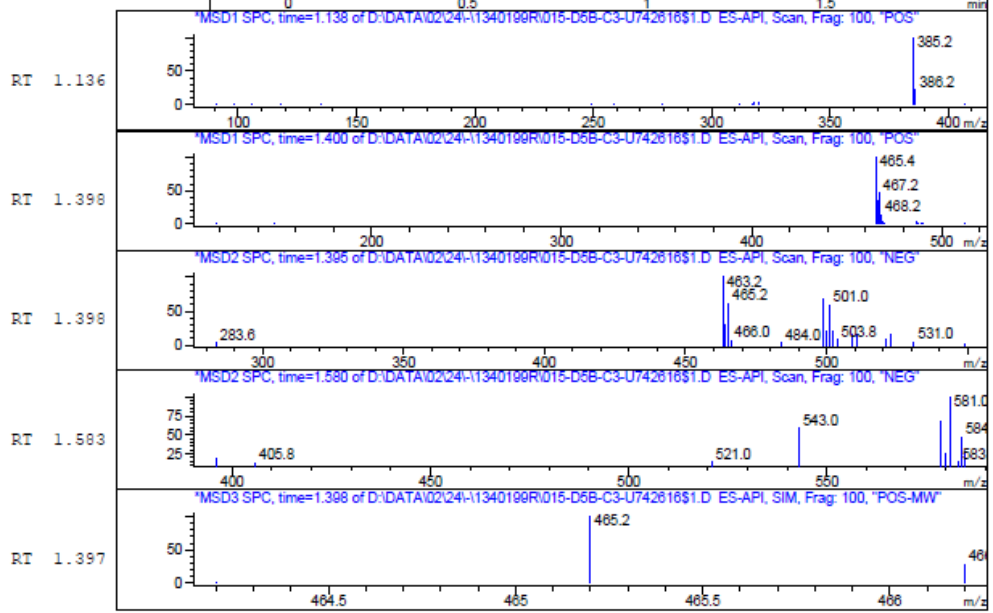

<sup>1</sup>H NMR spectrum of Z4886818555

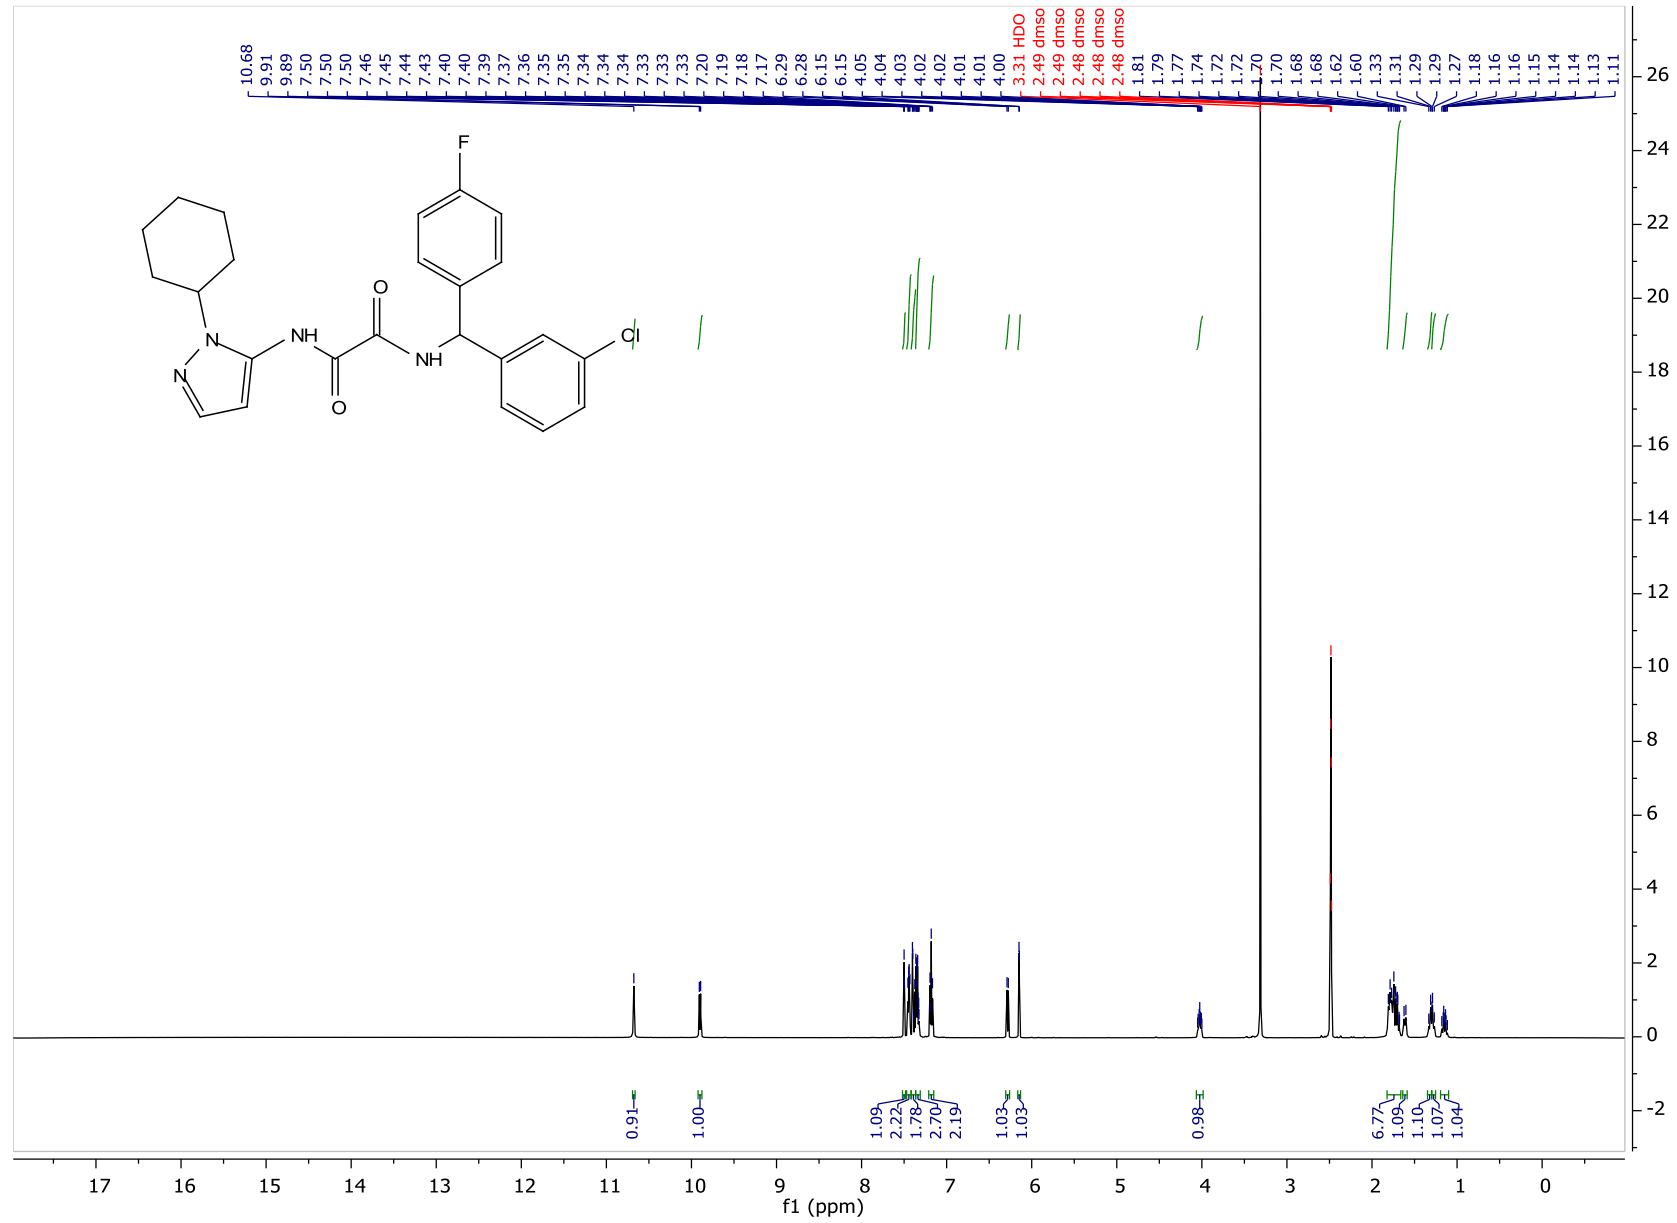

<sup>13</sup>C NMR spectrum of Z4886818555

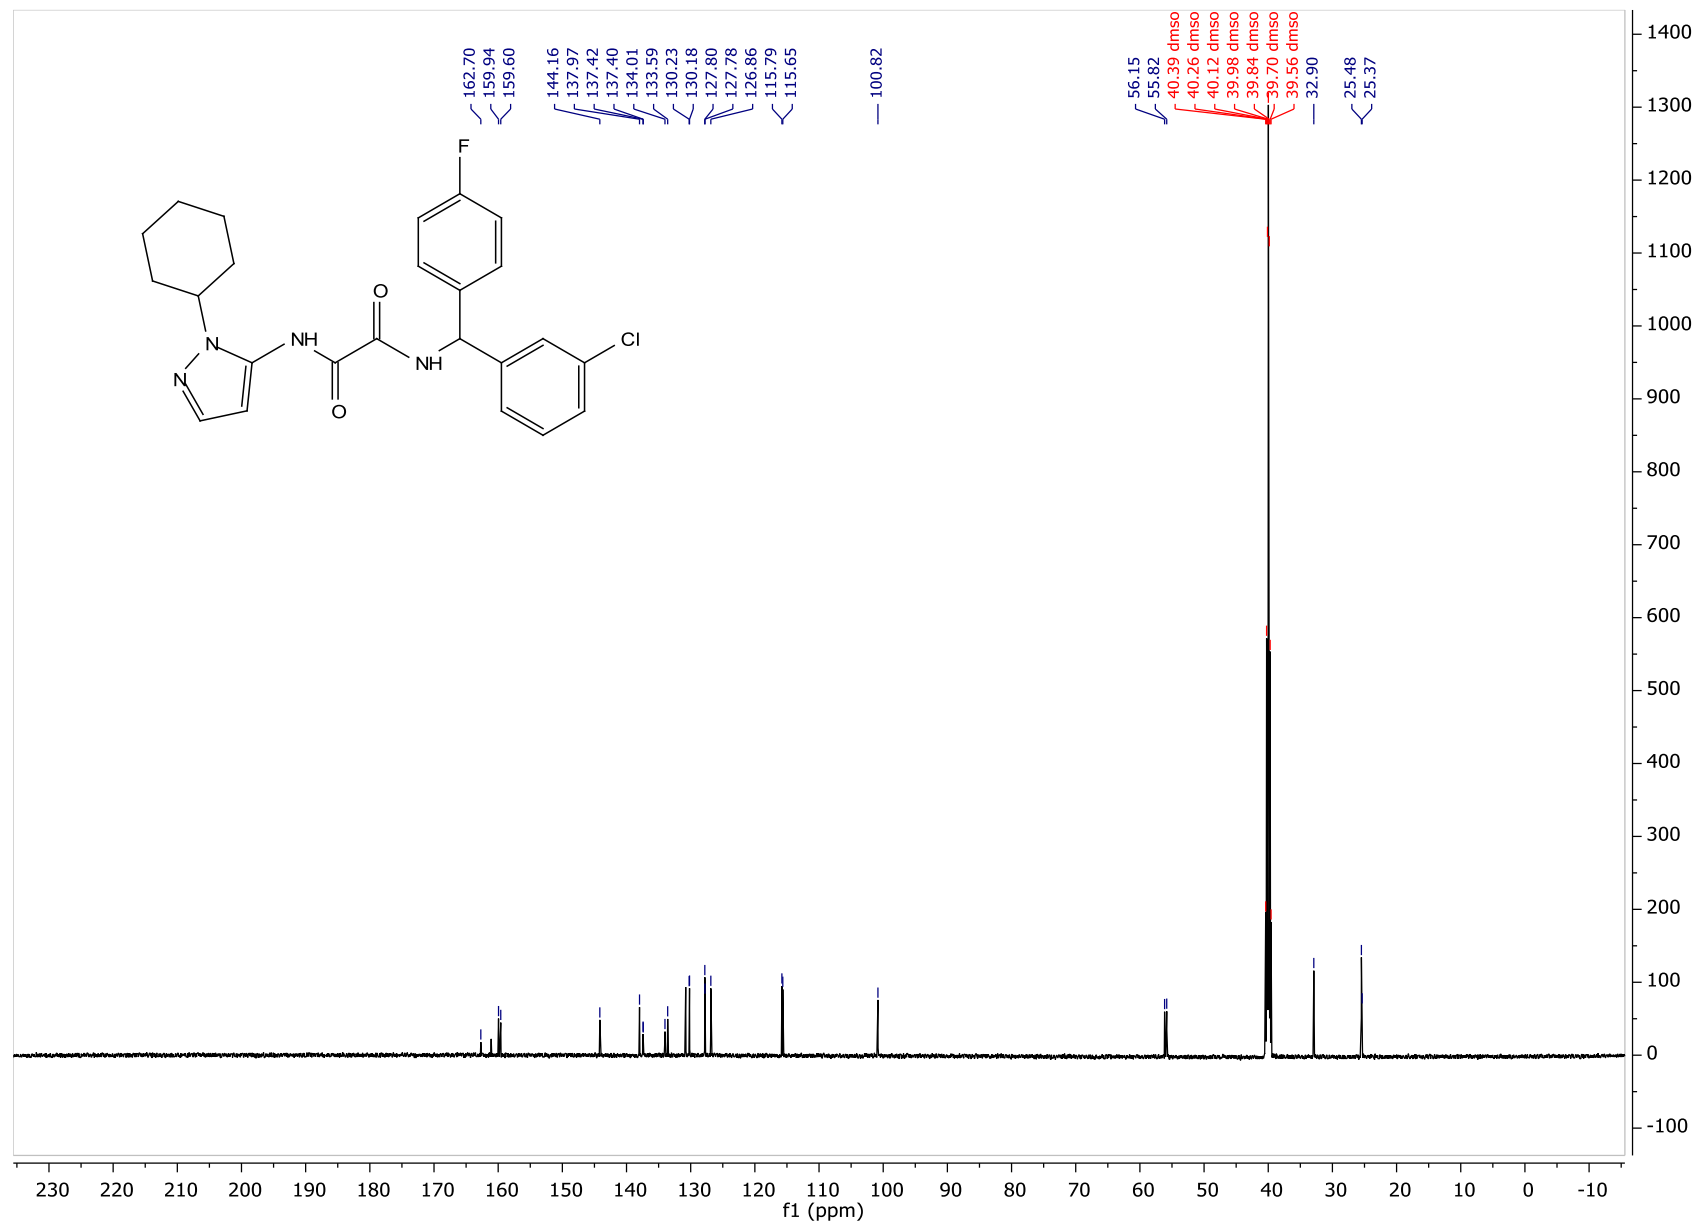



LC/MS spectrum of Z4886818555

Ret\_Time: 1.561 min

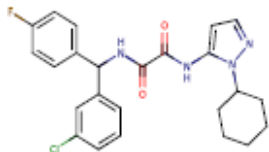

Mol Wt 454.92

Exact Mass 454.19

| # | Time  | Area%  |
|---|-------|--------|
| 1 | 1.561 | 100.00 |

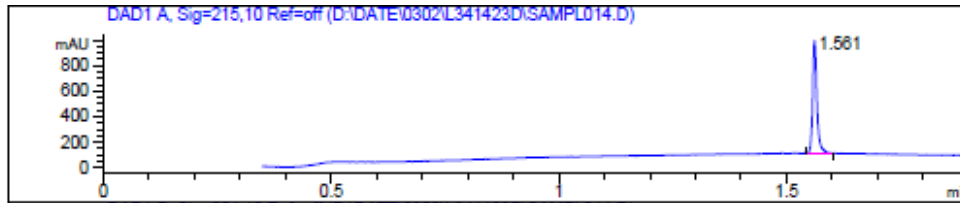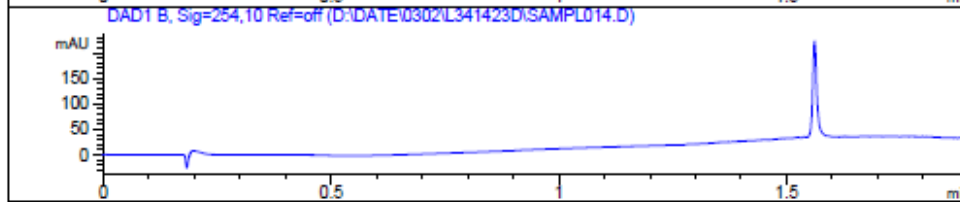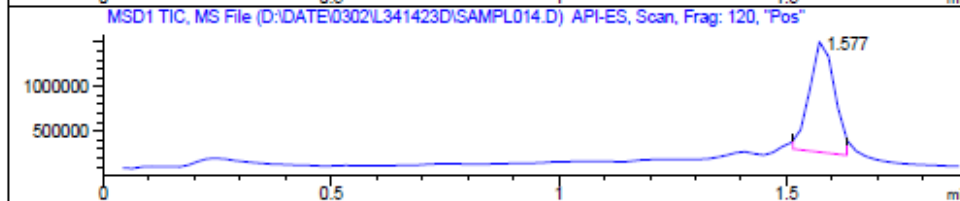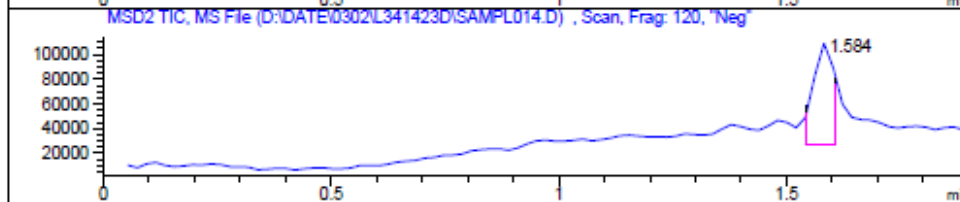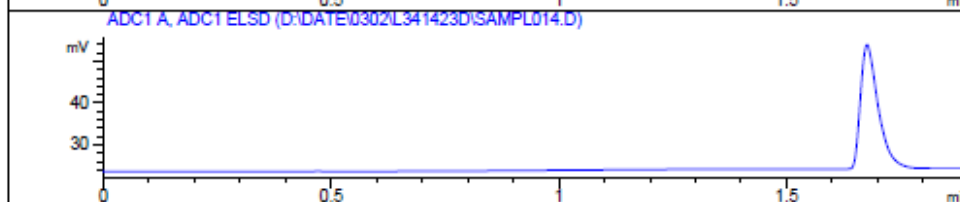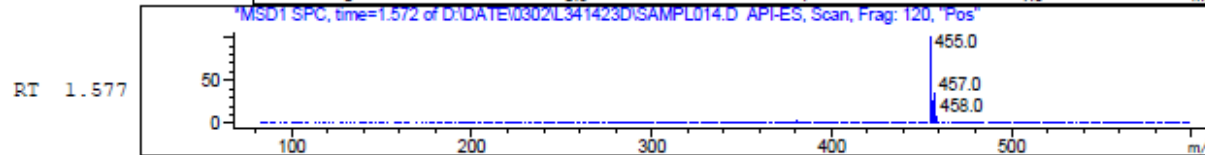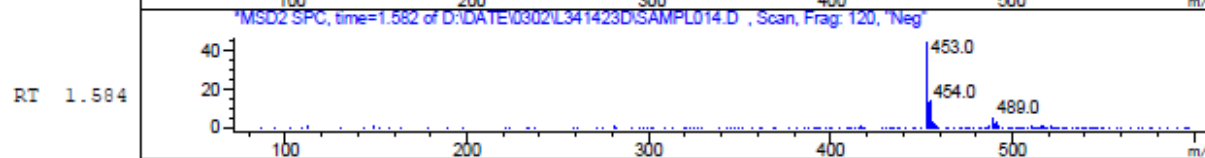

<sup>1</sup>H NMR spectrum of Z4886818558

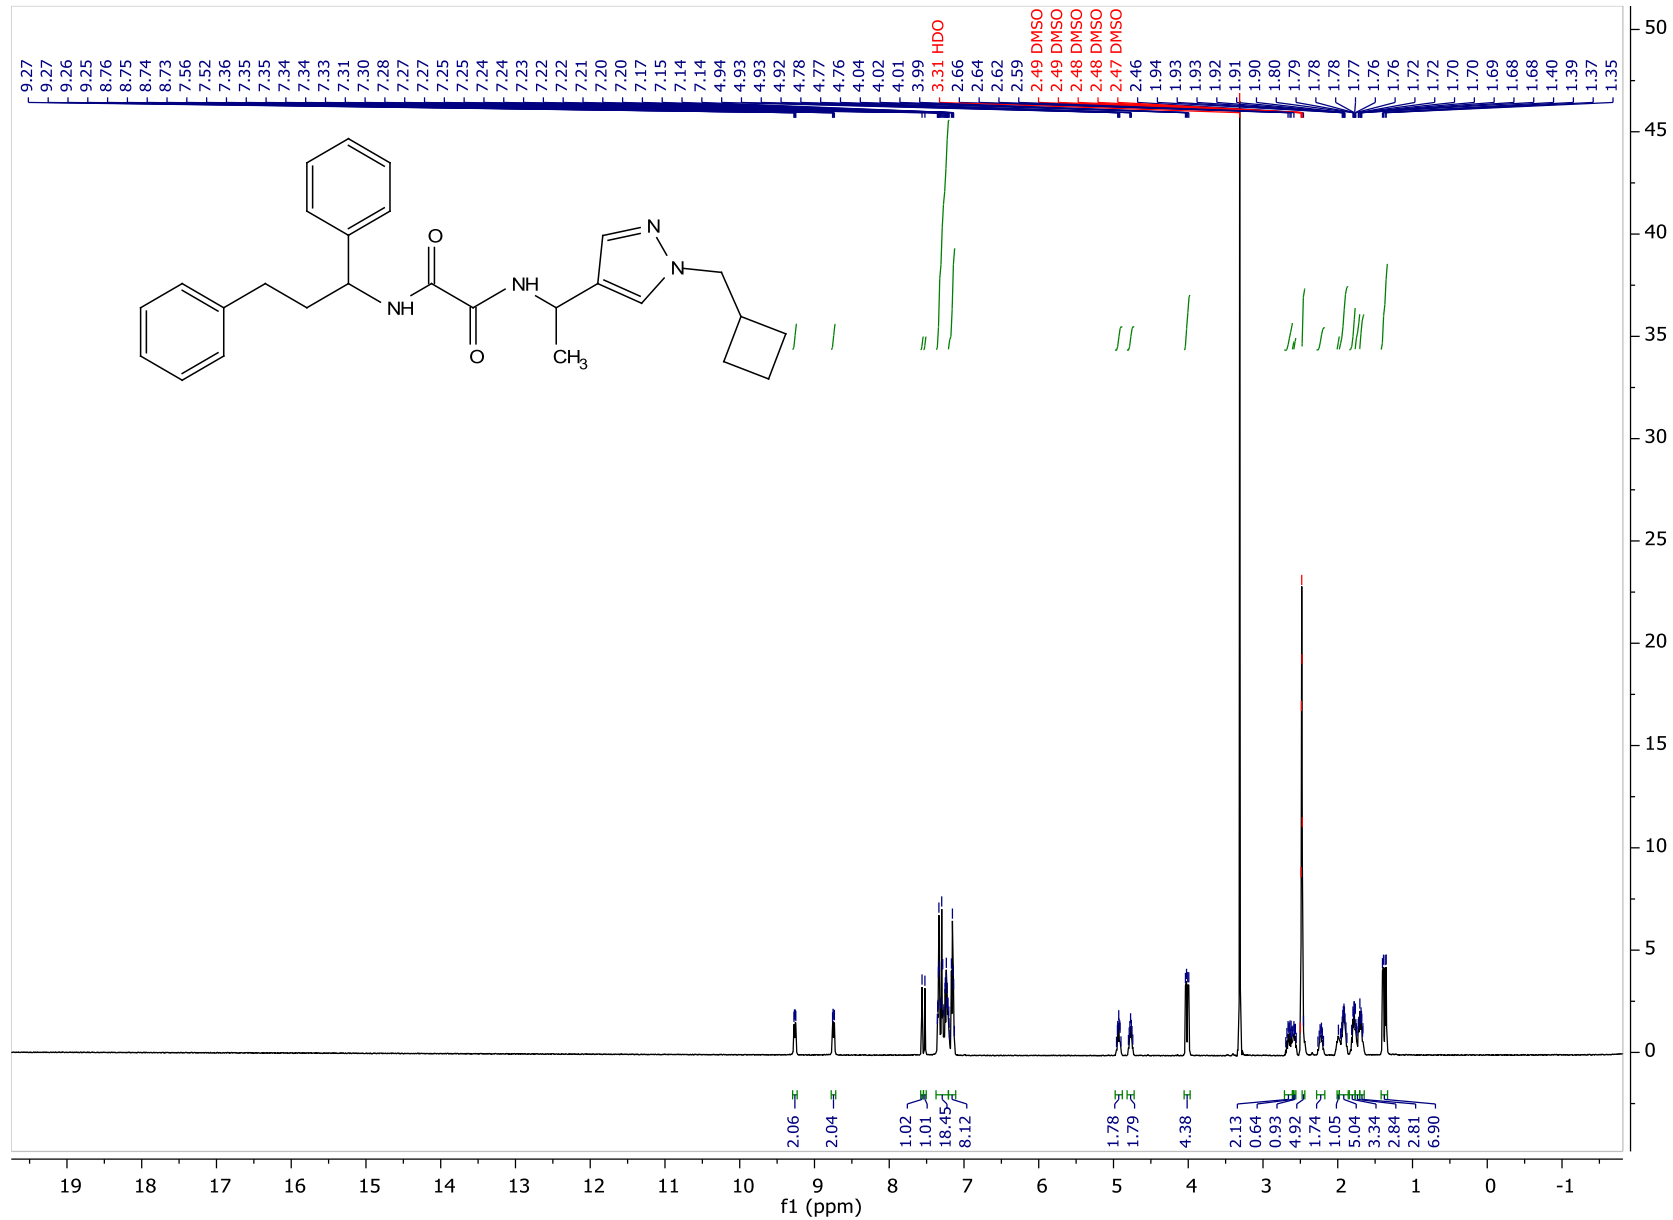

<sup>13</sup>C NMR spectrum of Z4886818558

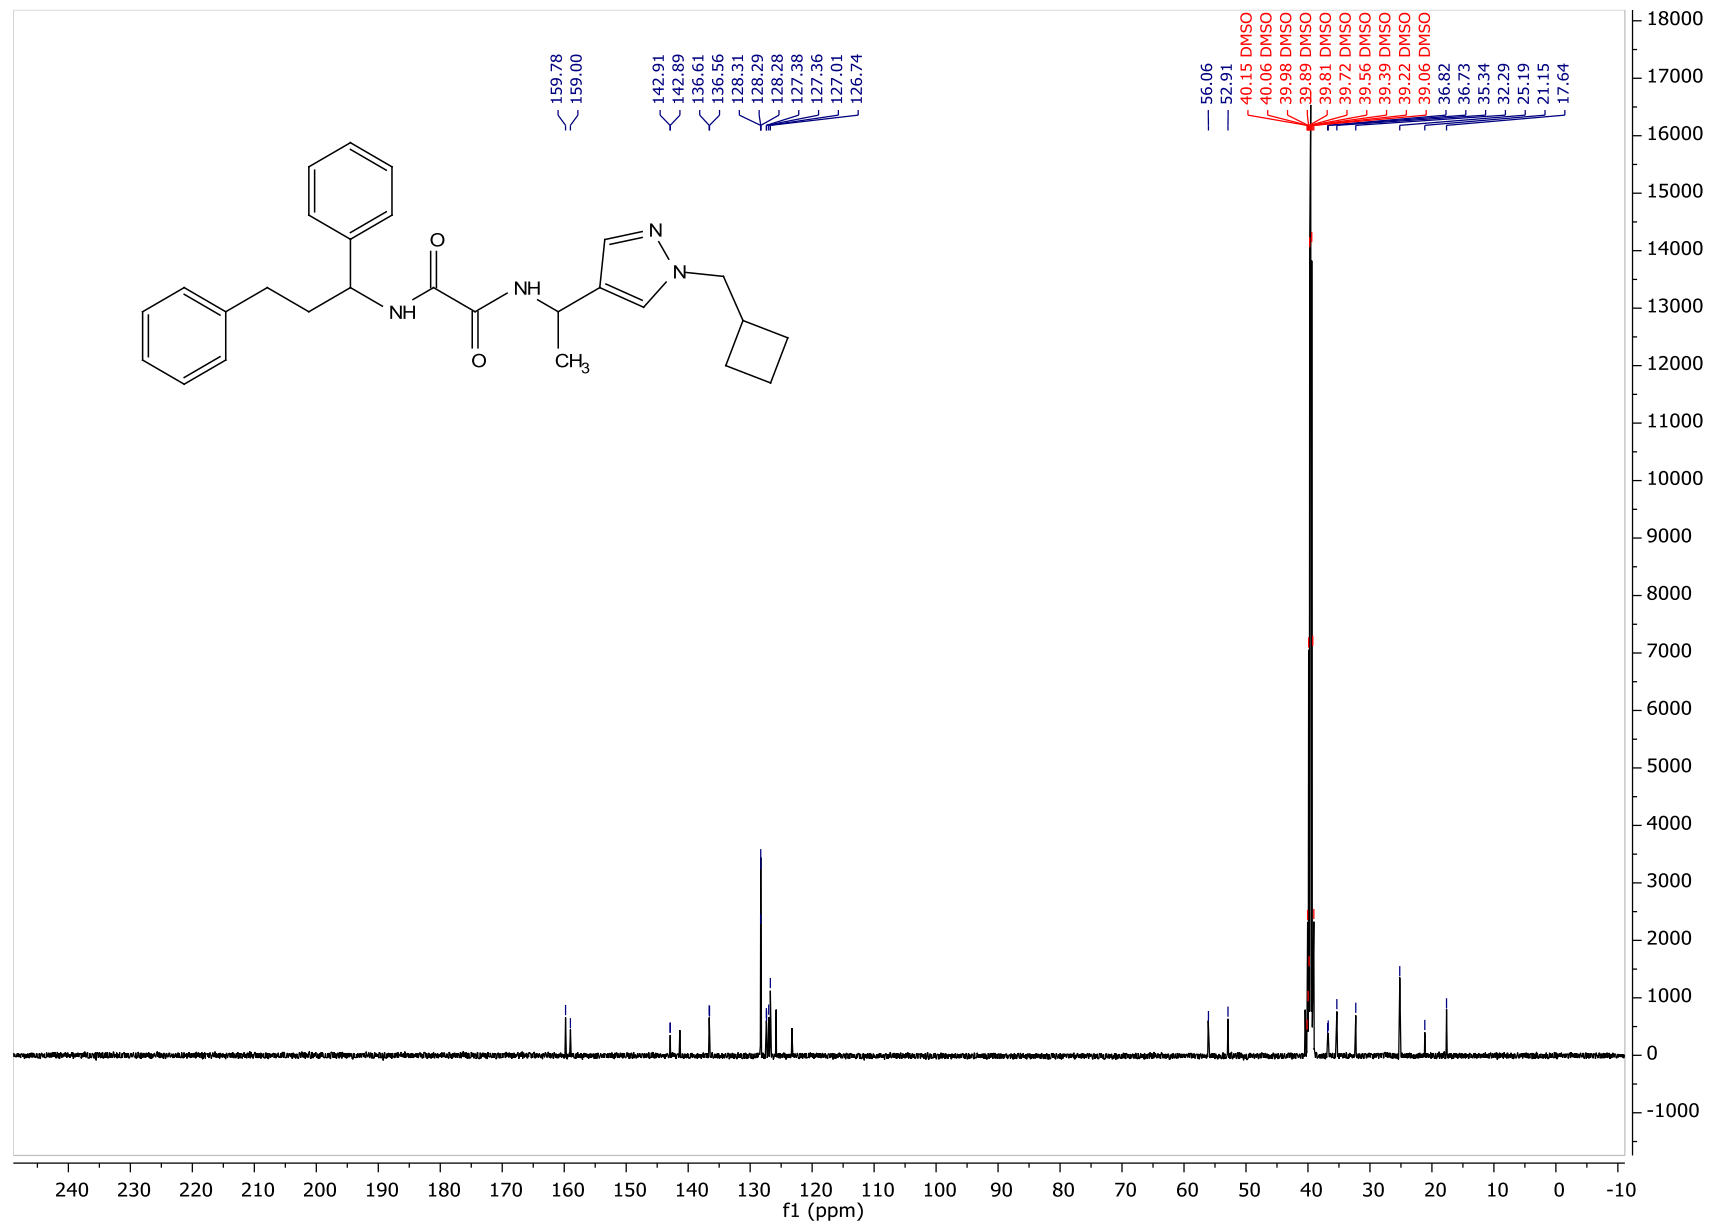

LC/MS spectrum of Z4886818558

Ret\_Time: 1.451 min

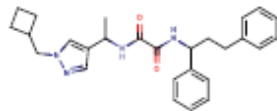

Mol Wt 444.57  
Exact Mass 444.3

| # | Time  | Area%  |
|---|-------|--------|
| 1 | 1.451 | 100.00 |

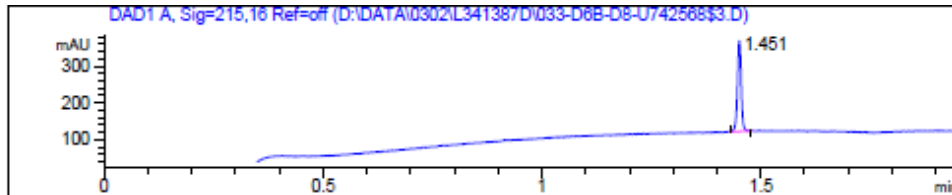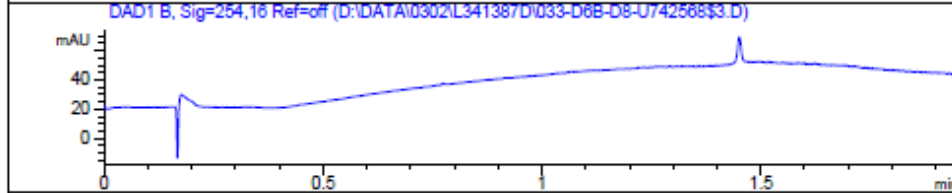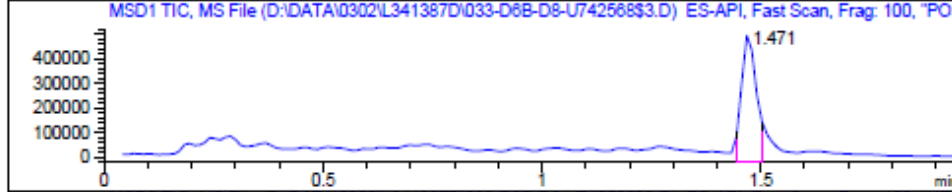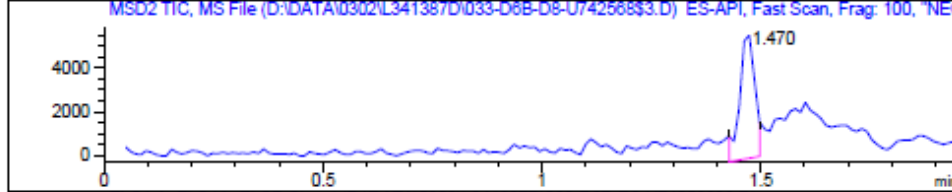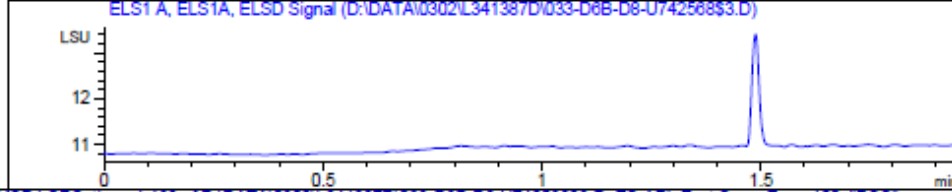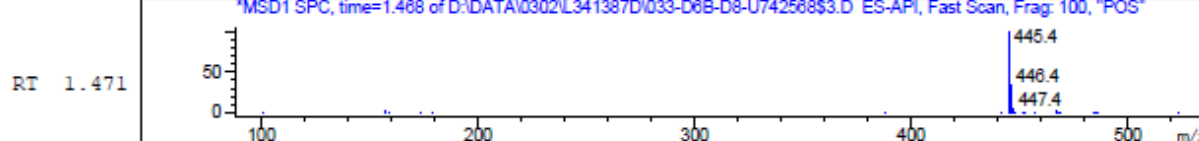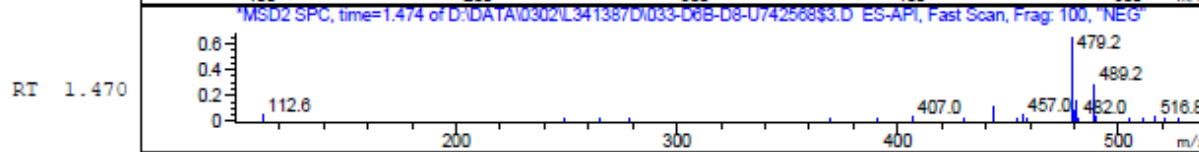

<sup>1</sup>H NMR spectrum of Z4886818577

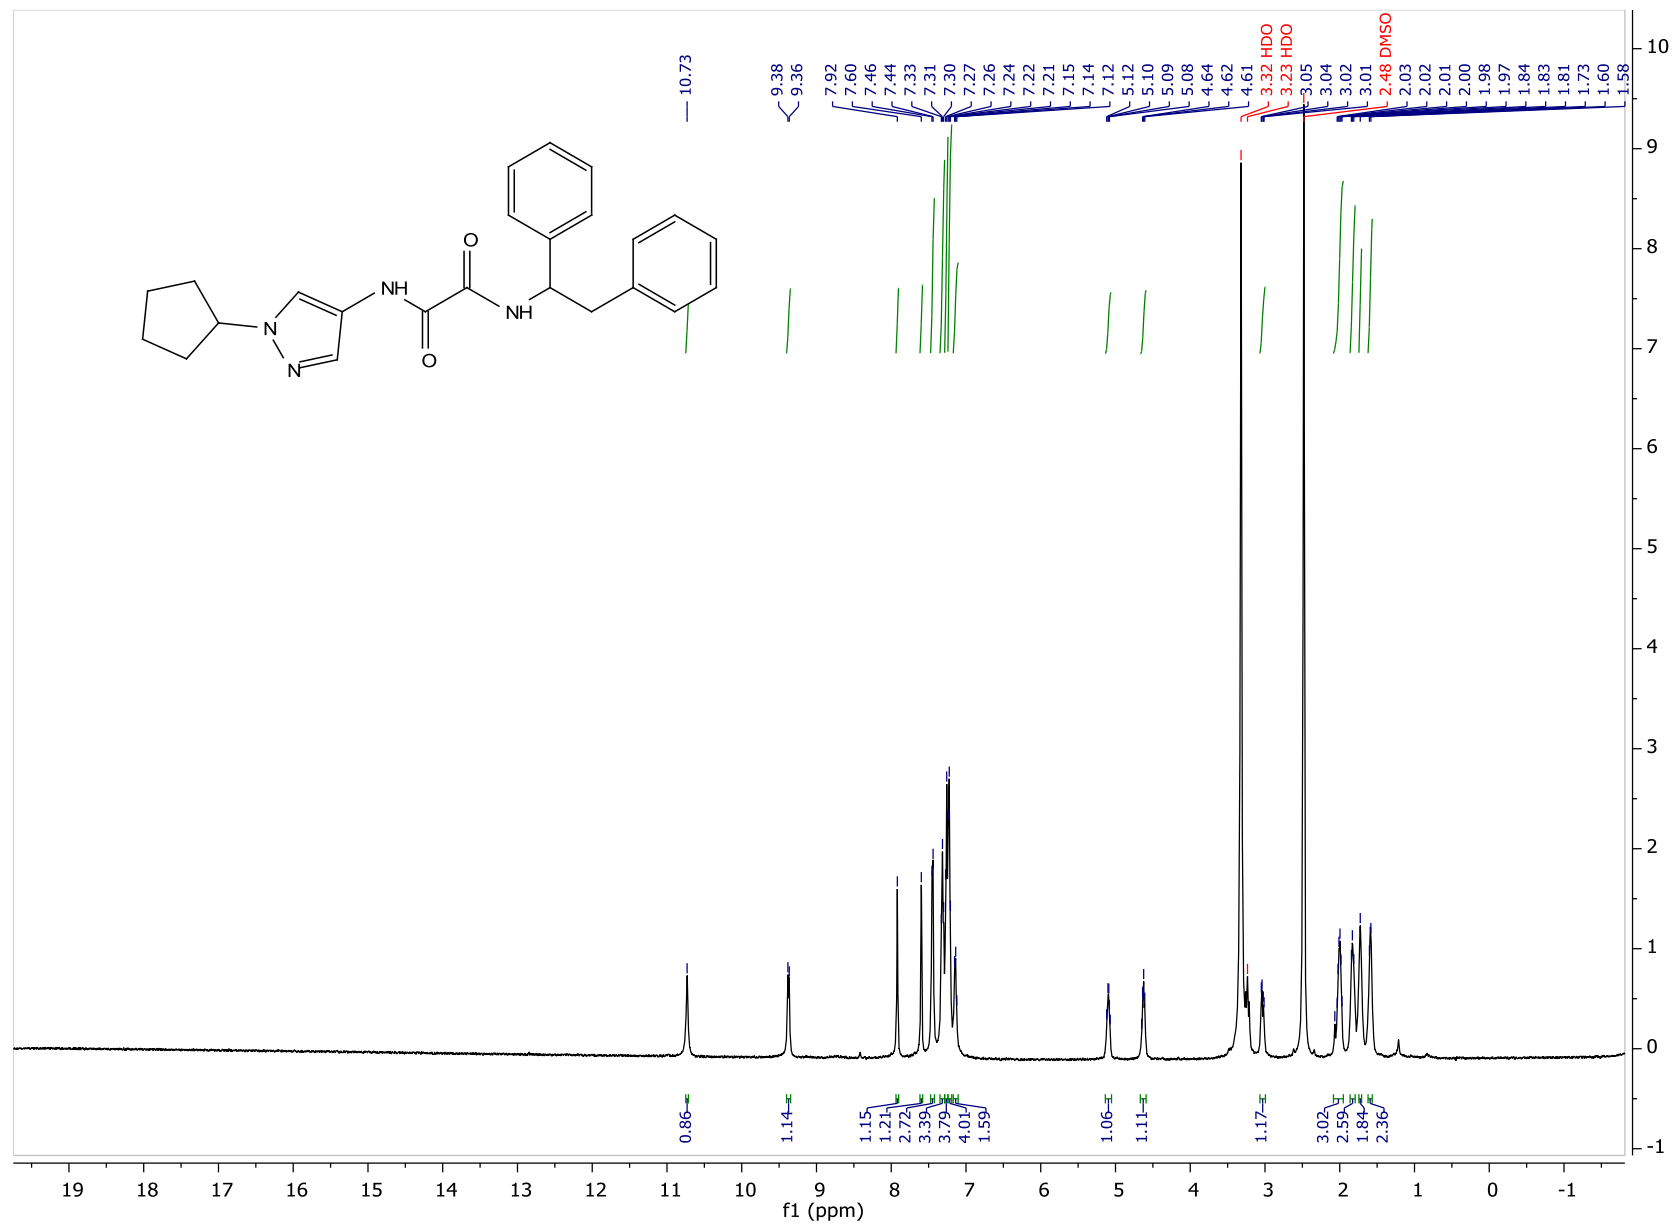

<sup>13</sup>C NMR spectrum of Z4886818577

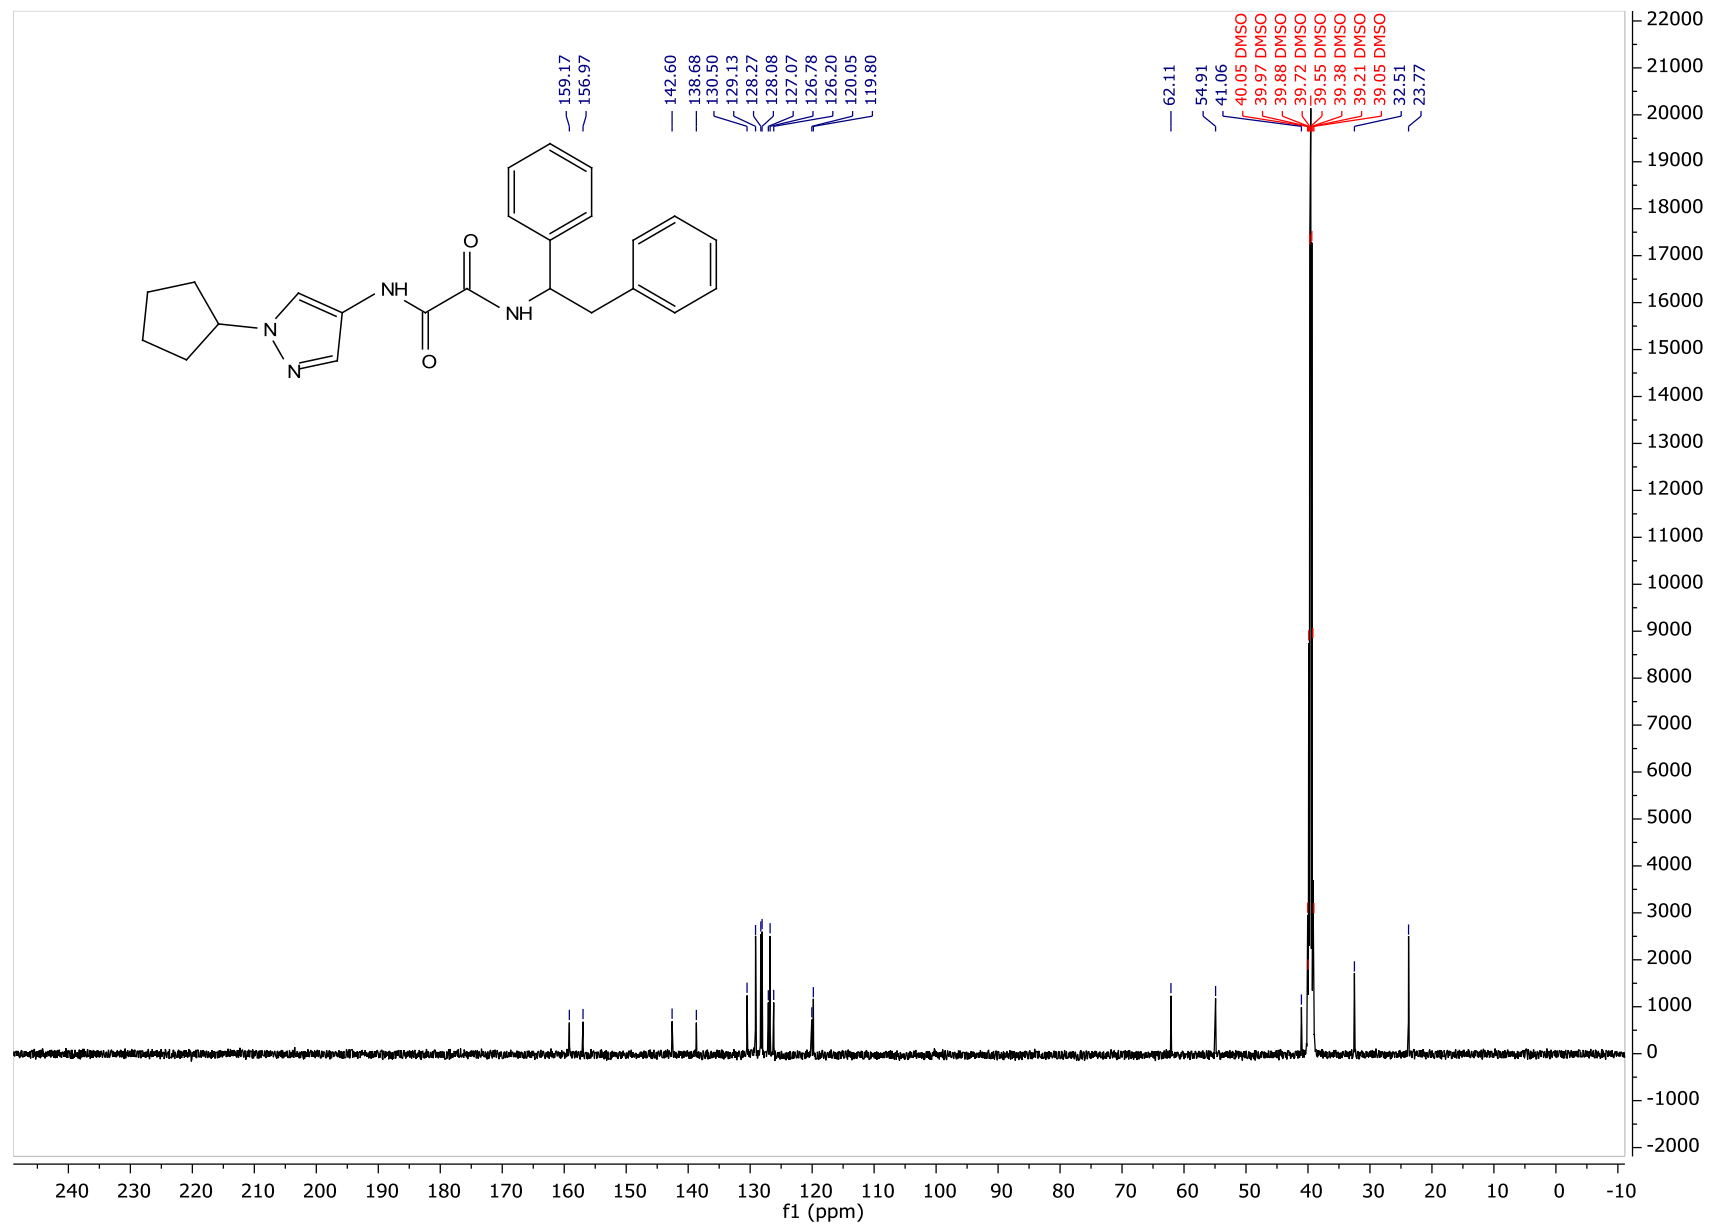

LC/MS spectrum of Z4886818577

Ret\_Time: 1.443 min

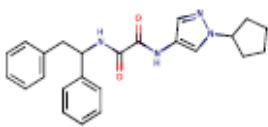

Mol Wt 402.49

Exact Mass 402.24

| # | Time  | Area%  |
|---|-------|--------|
| 1 | 1.443 | 100.00 |

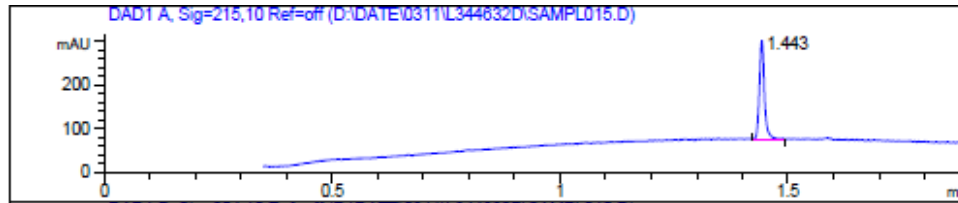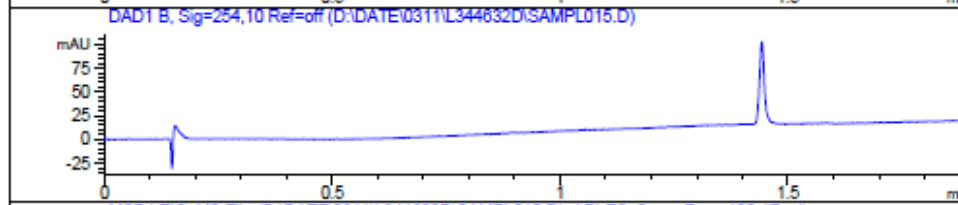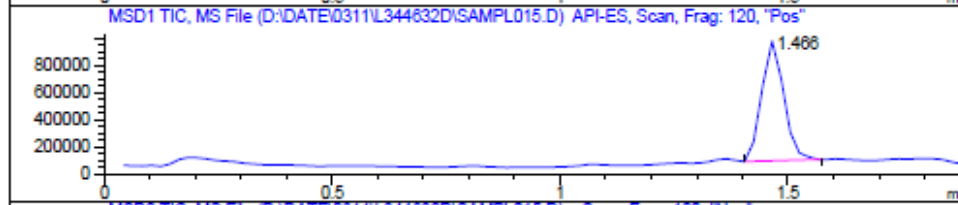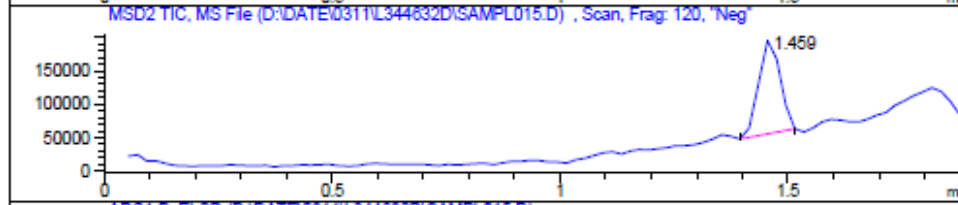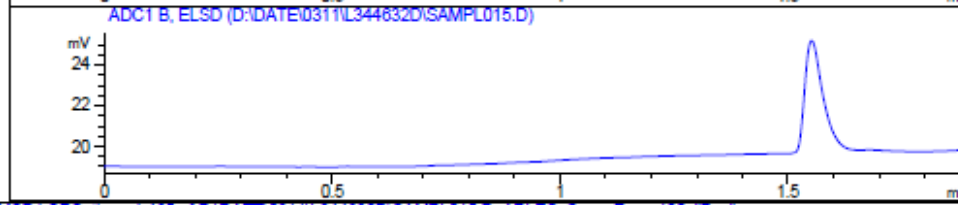

RT 1.466

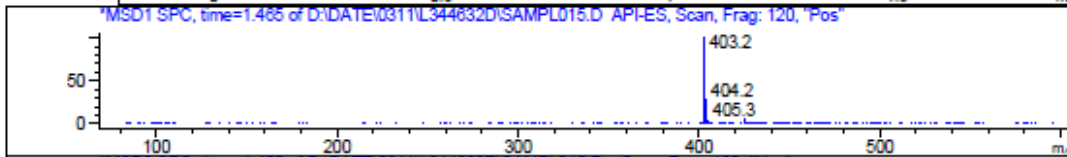

RT 1.459

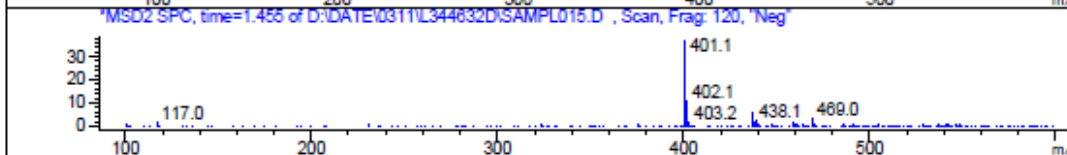

<sup>1</sup>H NMR spectrum of Z4886818591

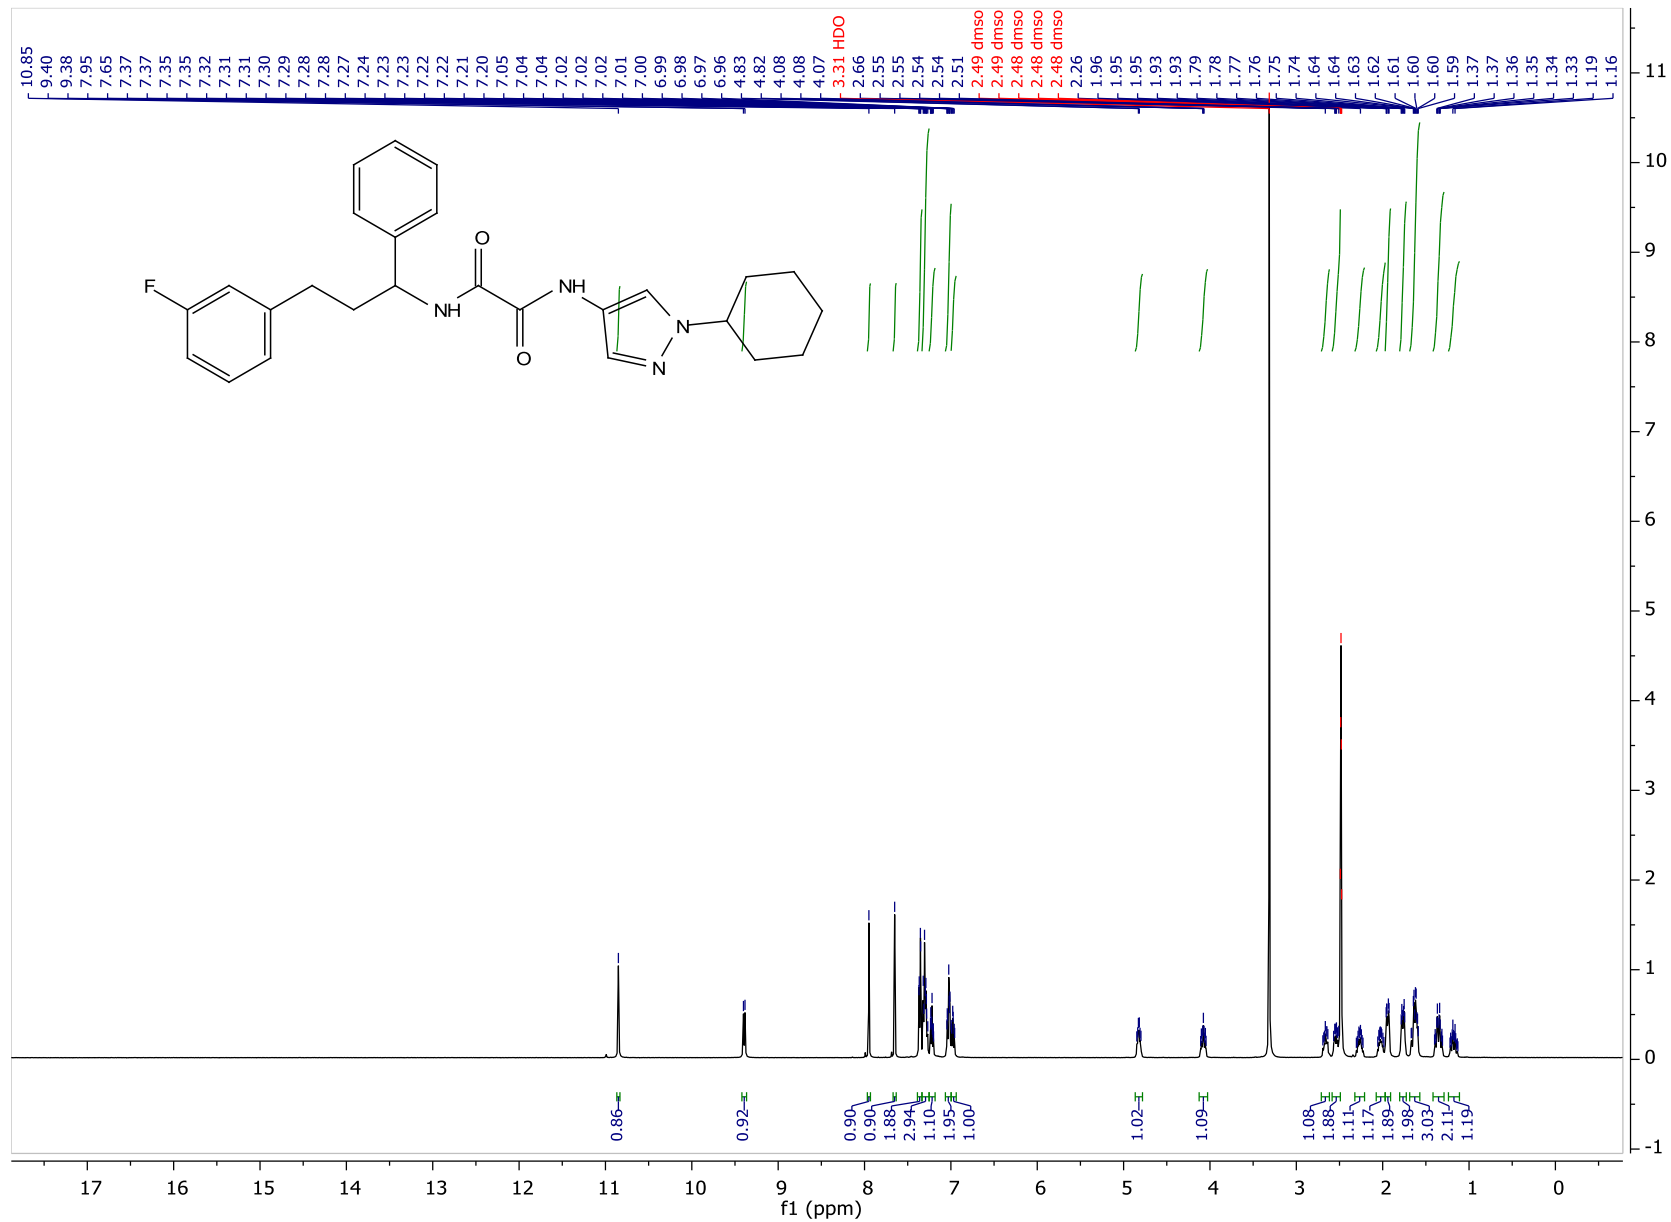



<sup>13</sup>C NMR spectrum of Z4886818591

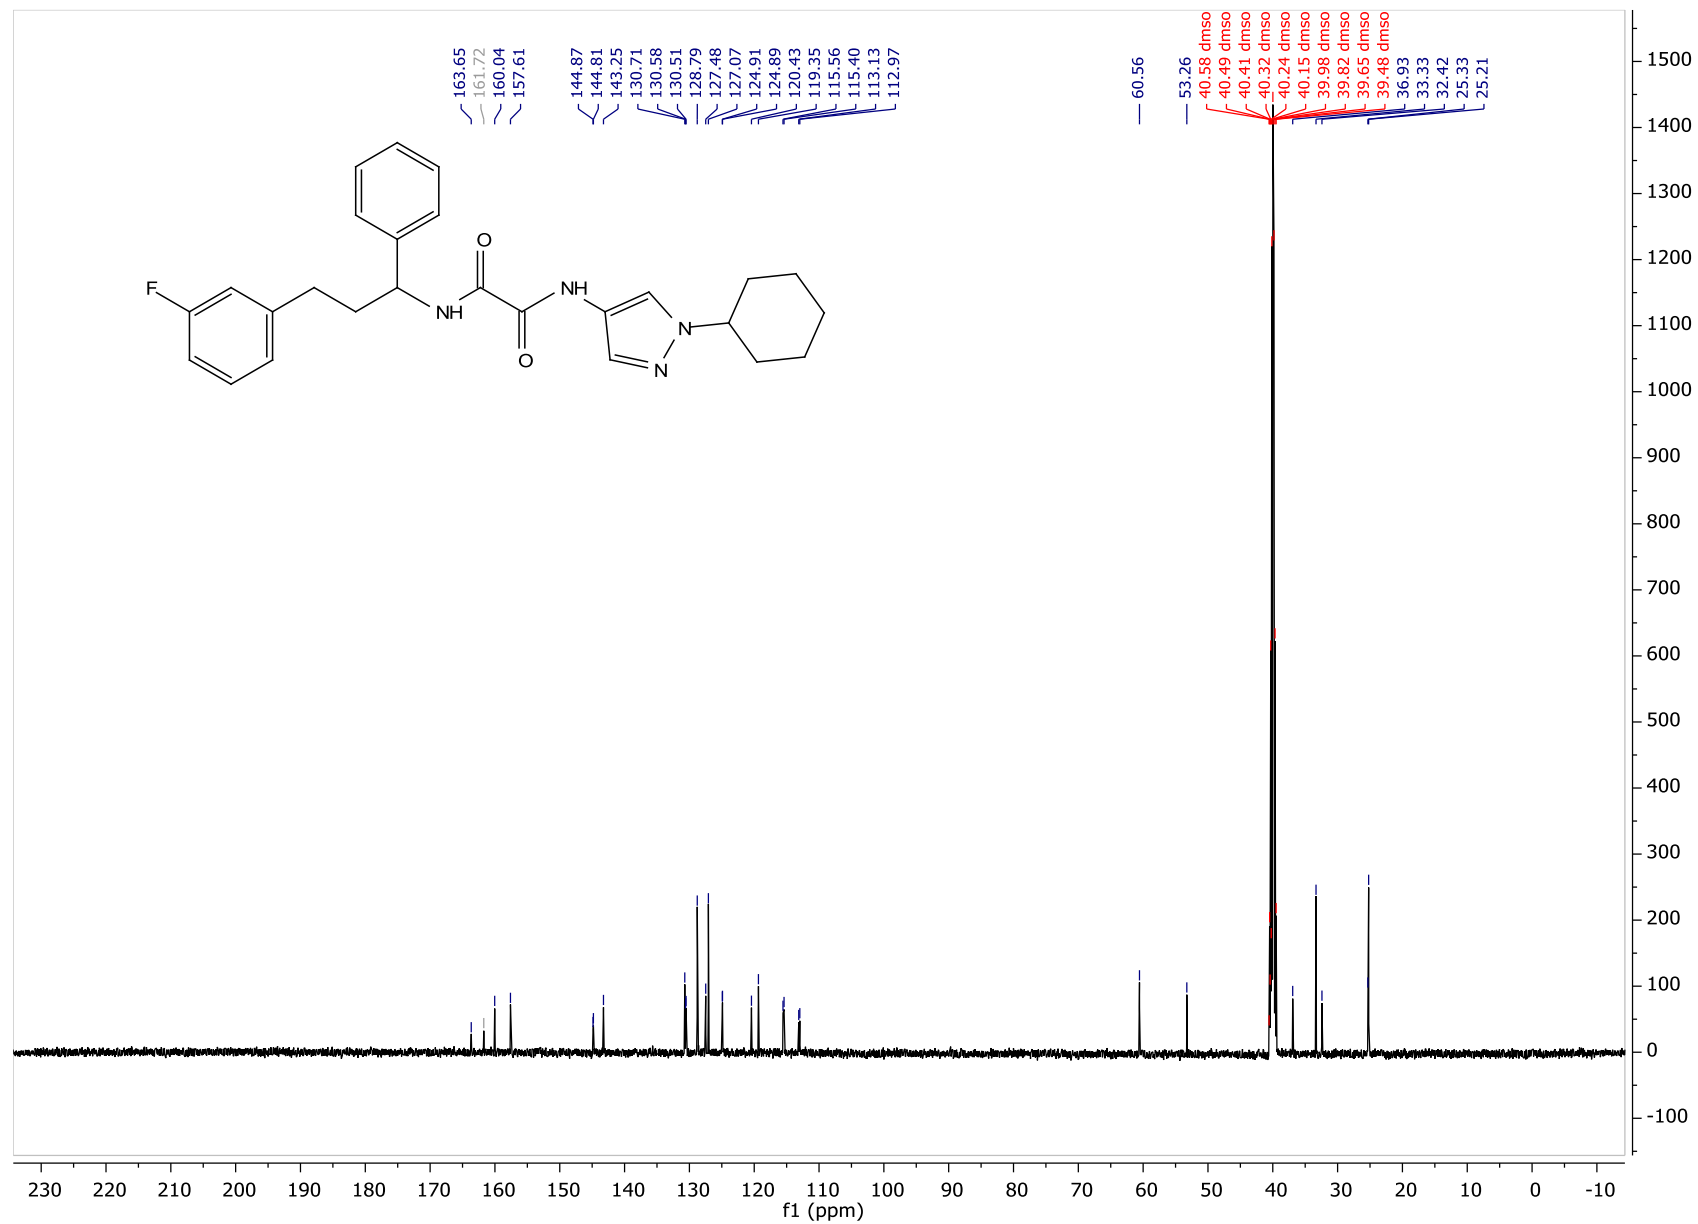

LC/MS spectrum of Z4886818591

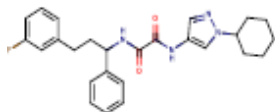

Mol Wt 448.53  
 Exact Mass 448.27

| # | Time  | Area% |
|---|-------|-------|
| 1 | 1.353 | 1.05  |
| 2 | 1.545 | 98.95 |

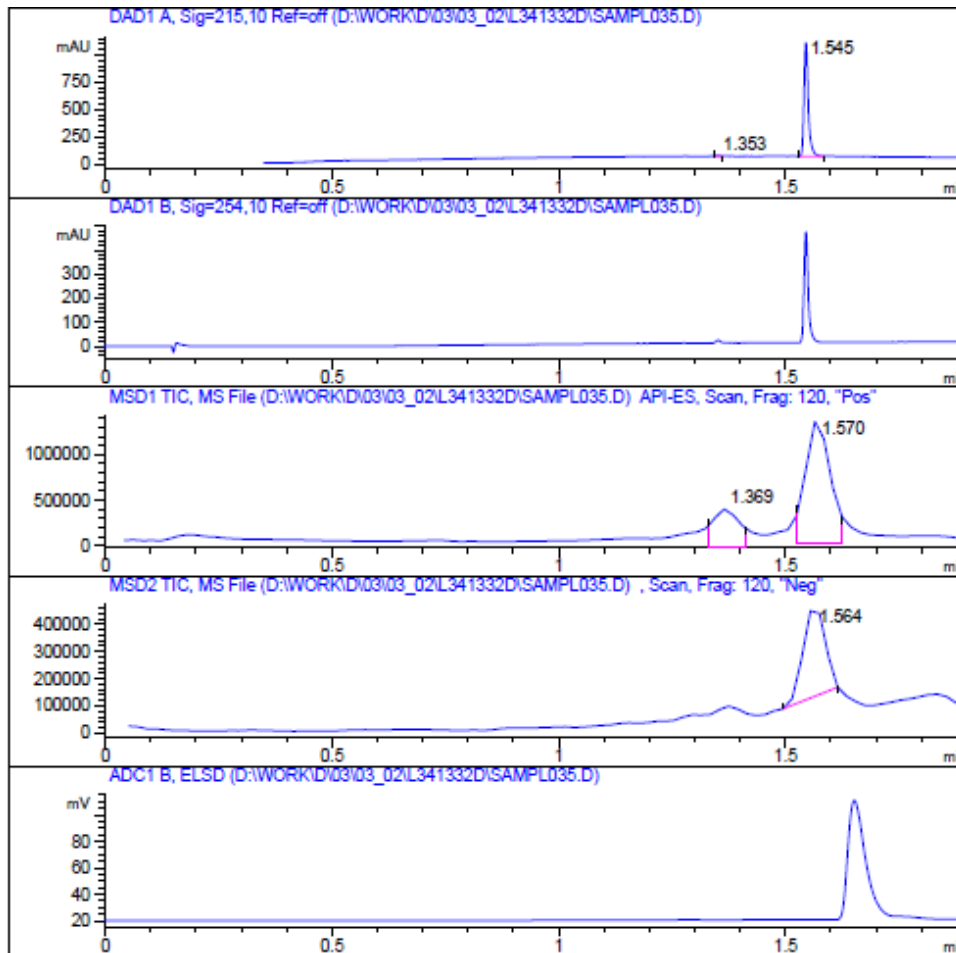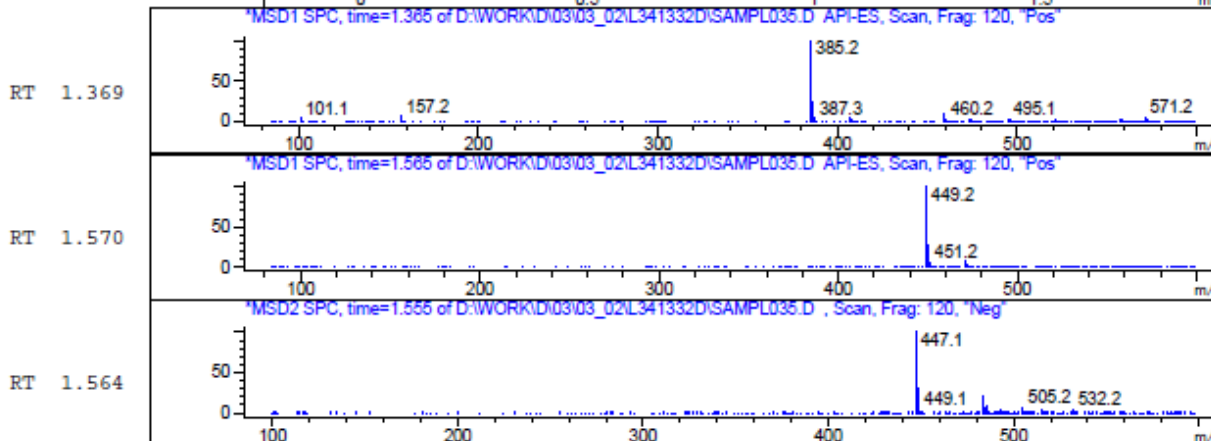

<sup>1</sup>H NMR spectrum of Z4886818594

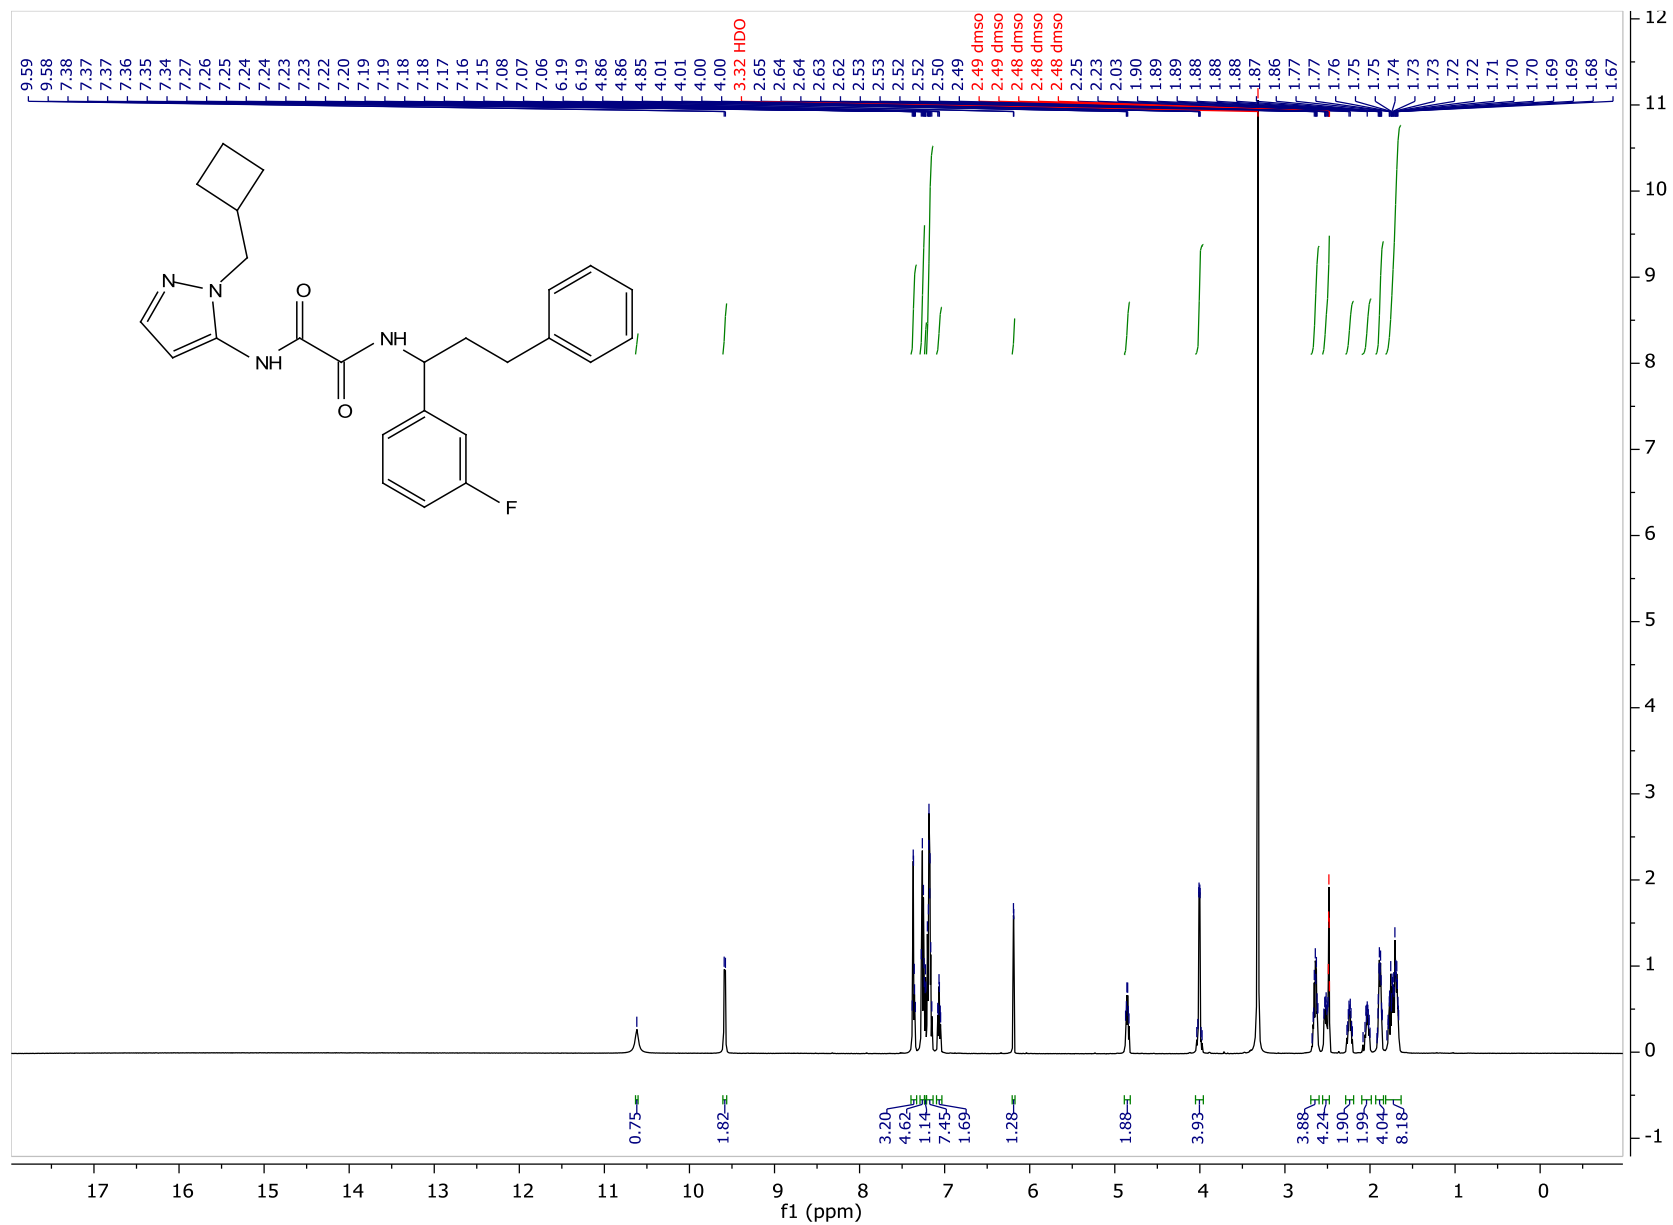

<sup>13</sup>C NMR spectrum of Z4886818594

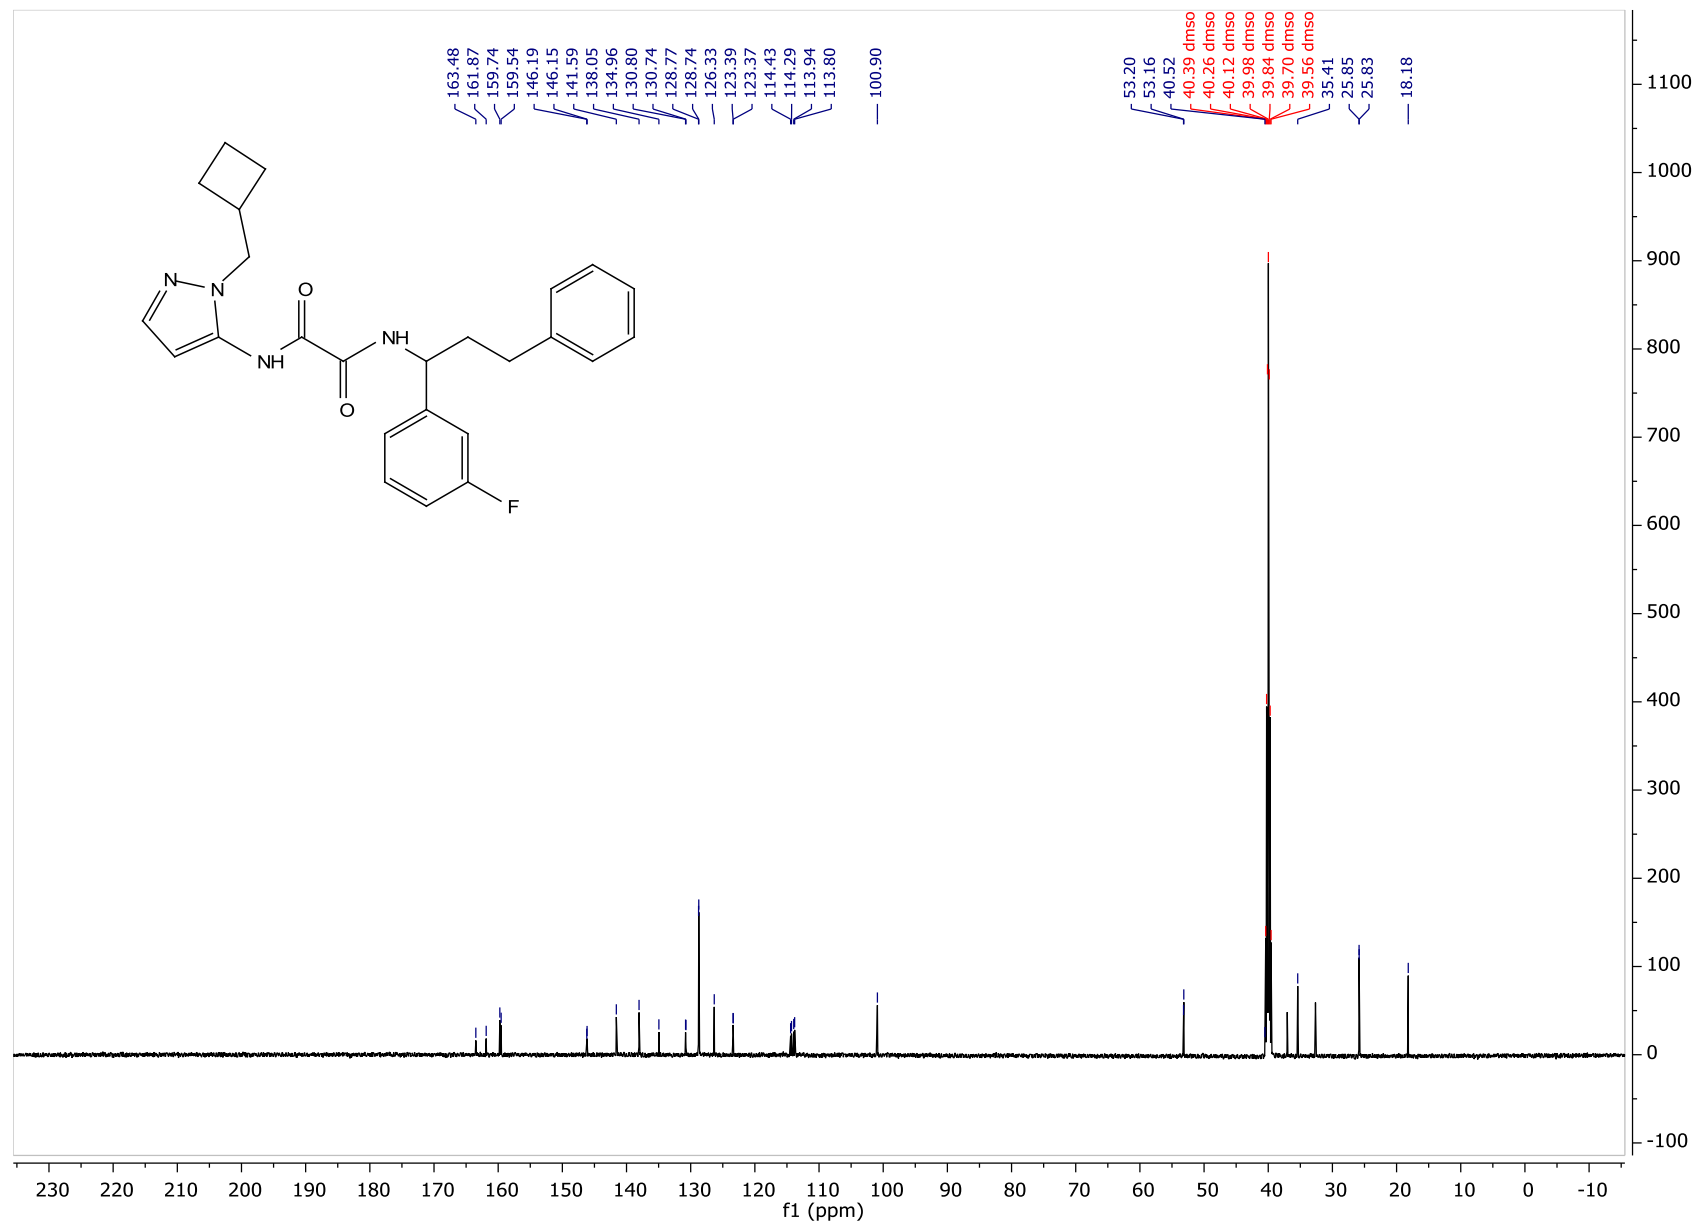

LC/MS spectrum of Z4886818594

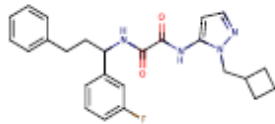

Mol Wt 434.51  
 Exact Mass 434.25  
 # Time Area%

| # | Time  | Area%  |
|---|-------|--------|
| 1 | 1.545 | 100.00 |

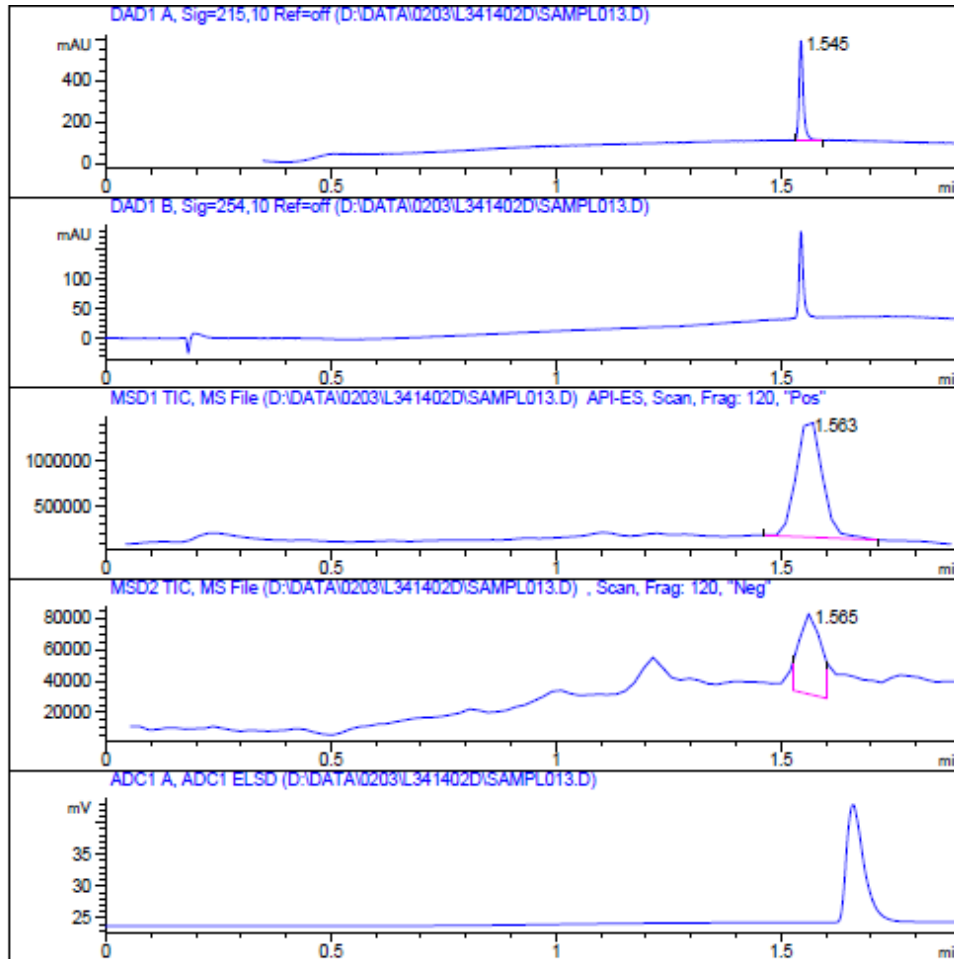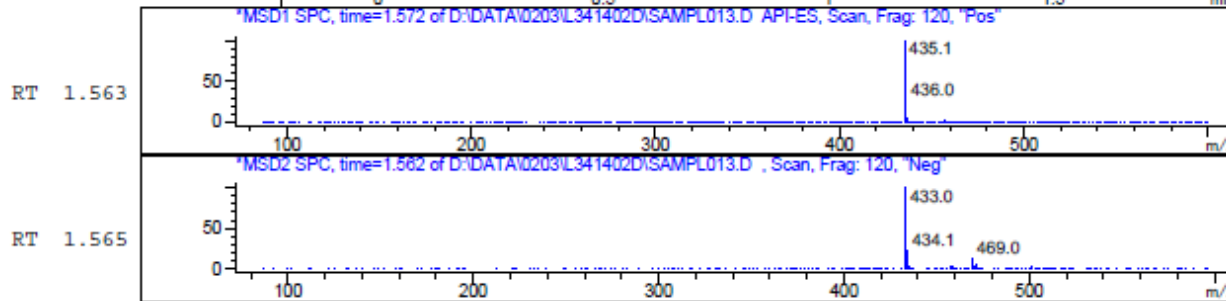

<sup>1</sup>H NMR spectrum of Z4886818606

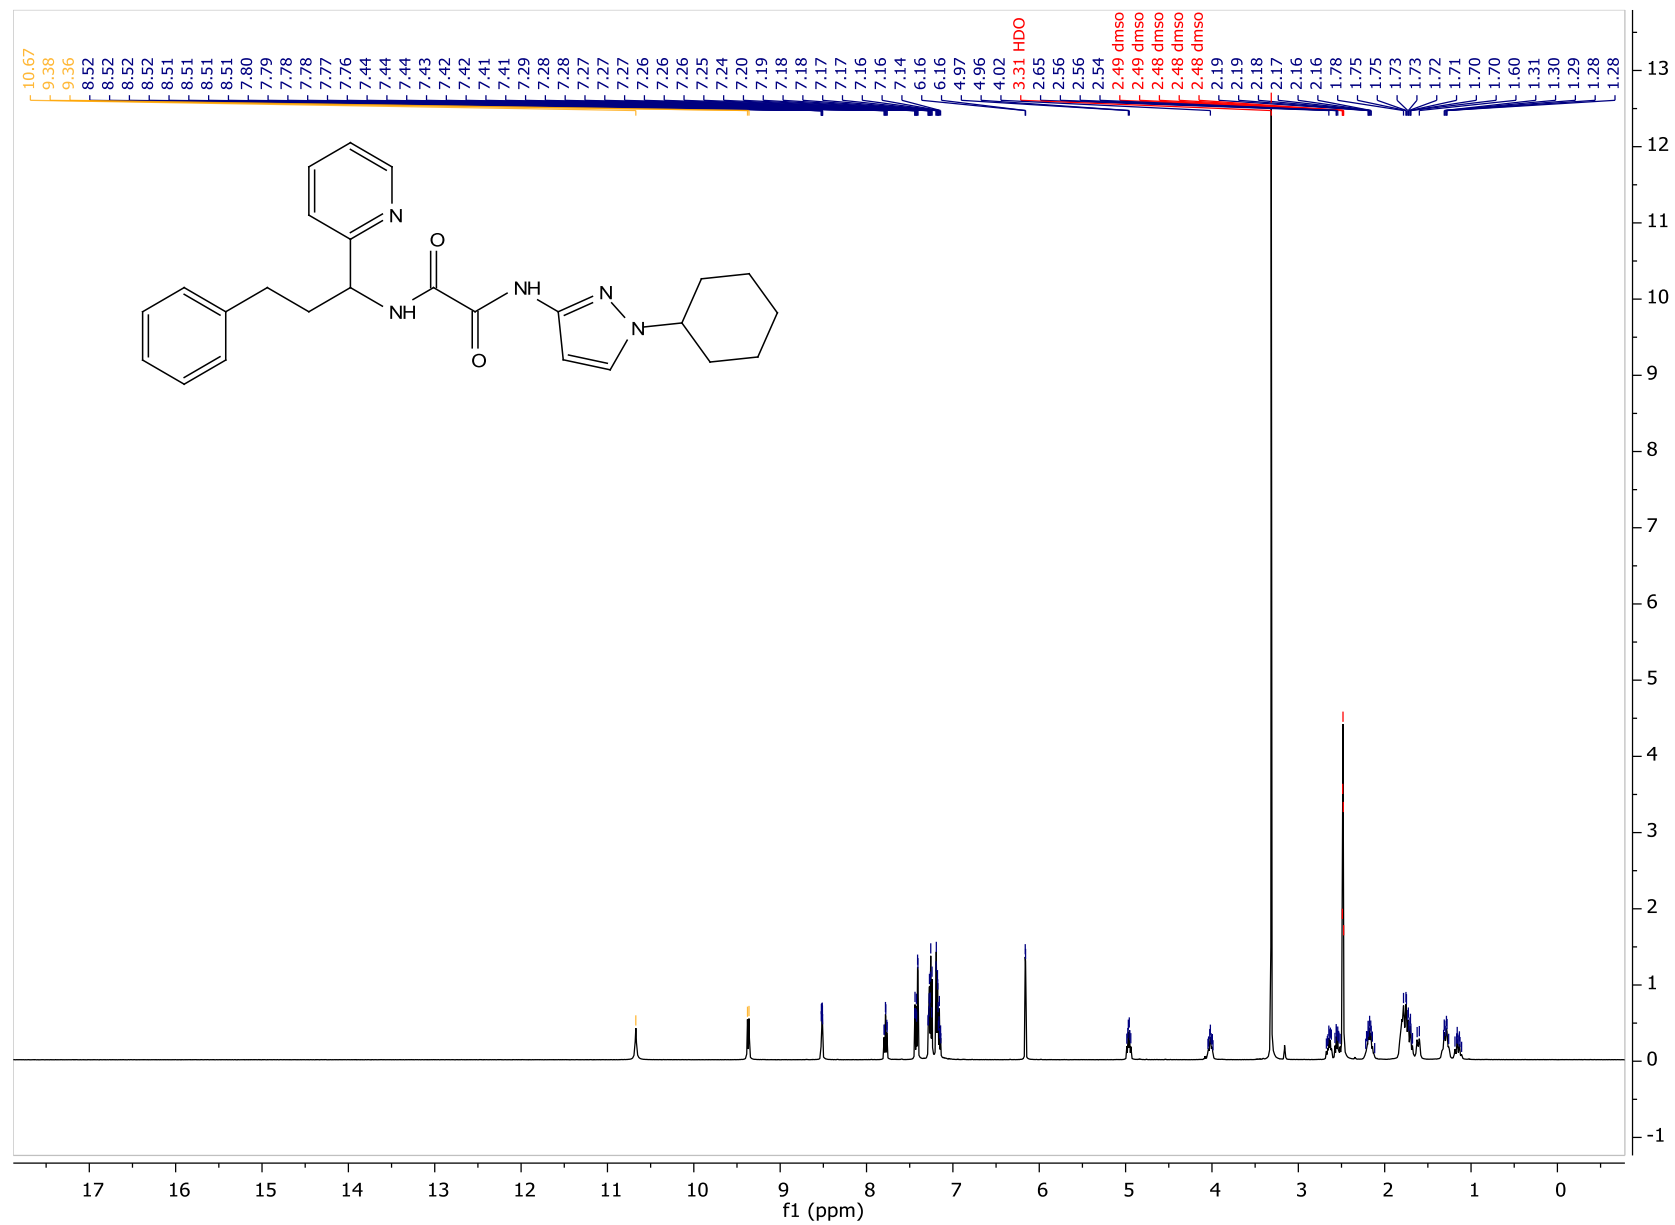

<sup>13</sup>C NMR spectrum of Z4886818606

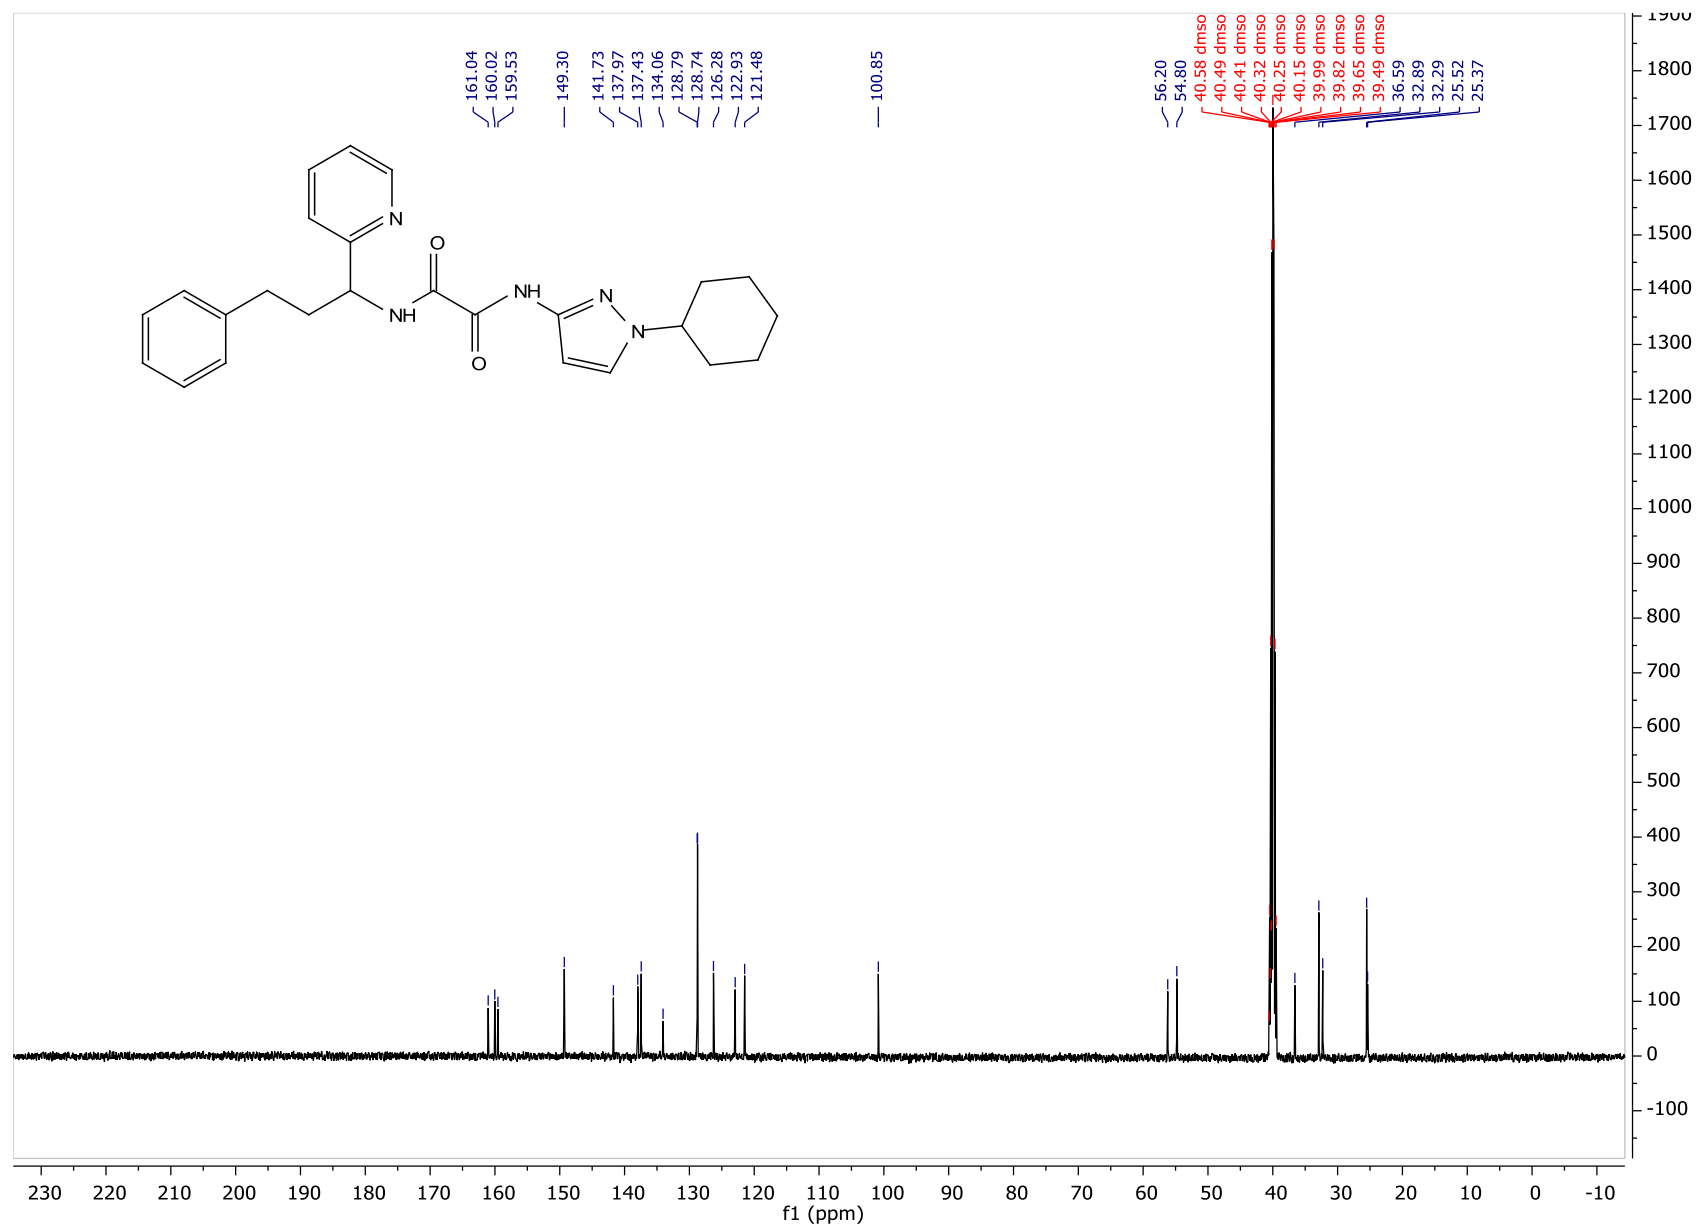

LC/MS spectrum of Z4886818606

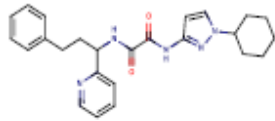

Mol Wt 431.53  
 Exact Mass 431.27

| # | Time  | Area%  |
|---|-------|--------|
| 1 | 1.413 | 100.00 |

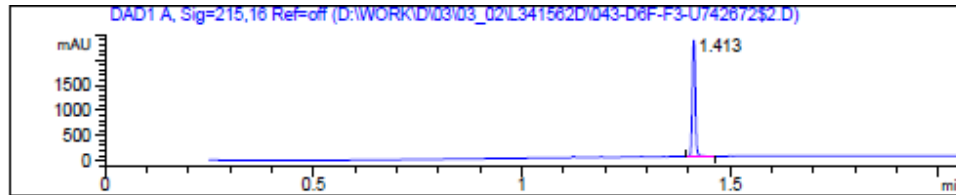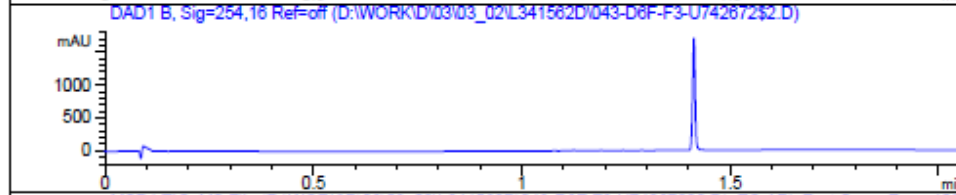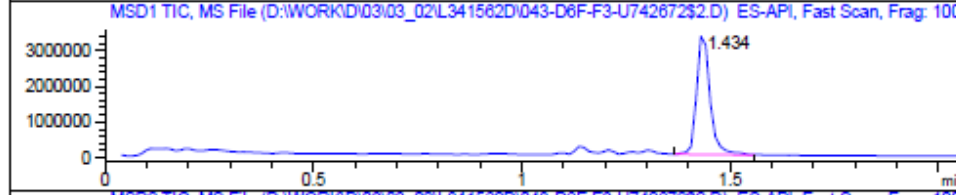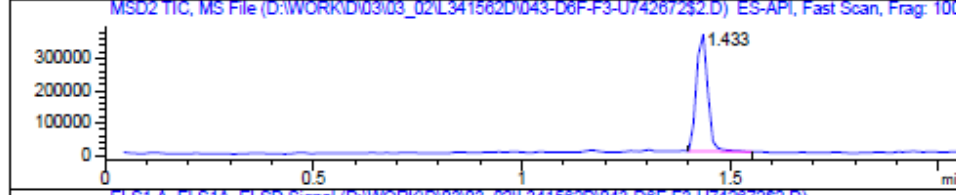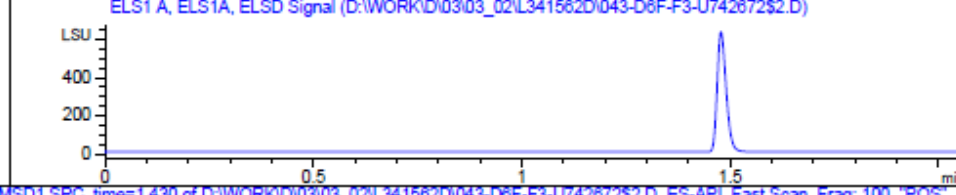

RT 1.434

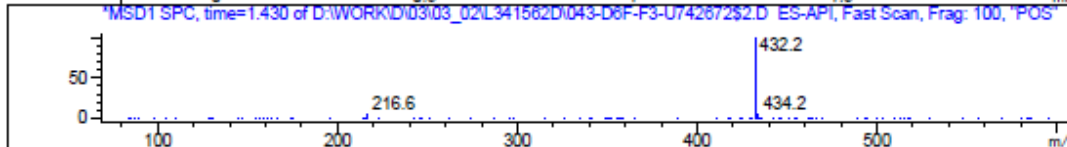

RT 1.433

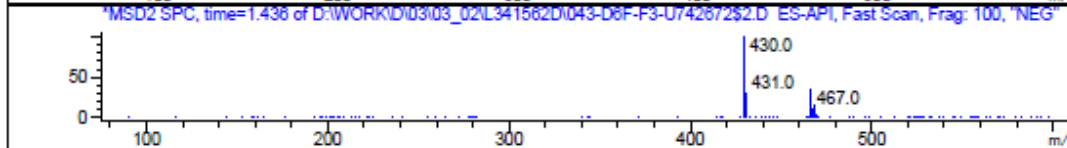



<sup>1</sup>H NMR spectrum of Z4886818613

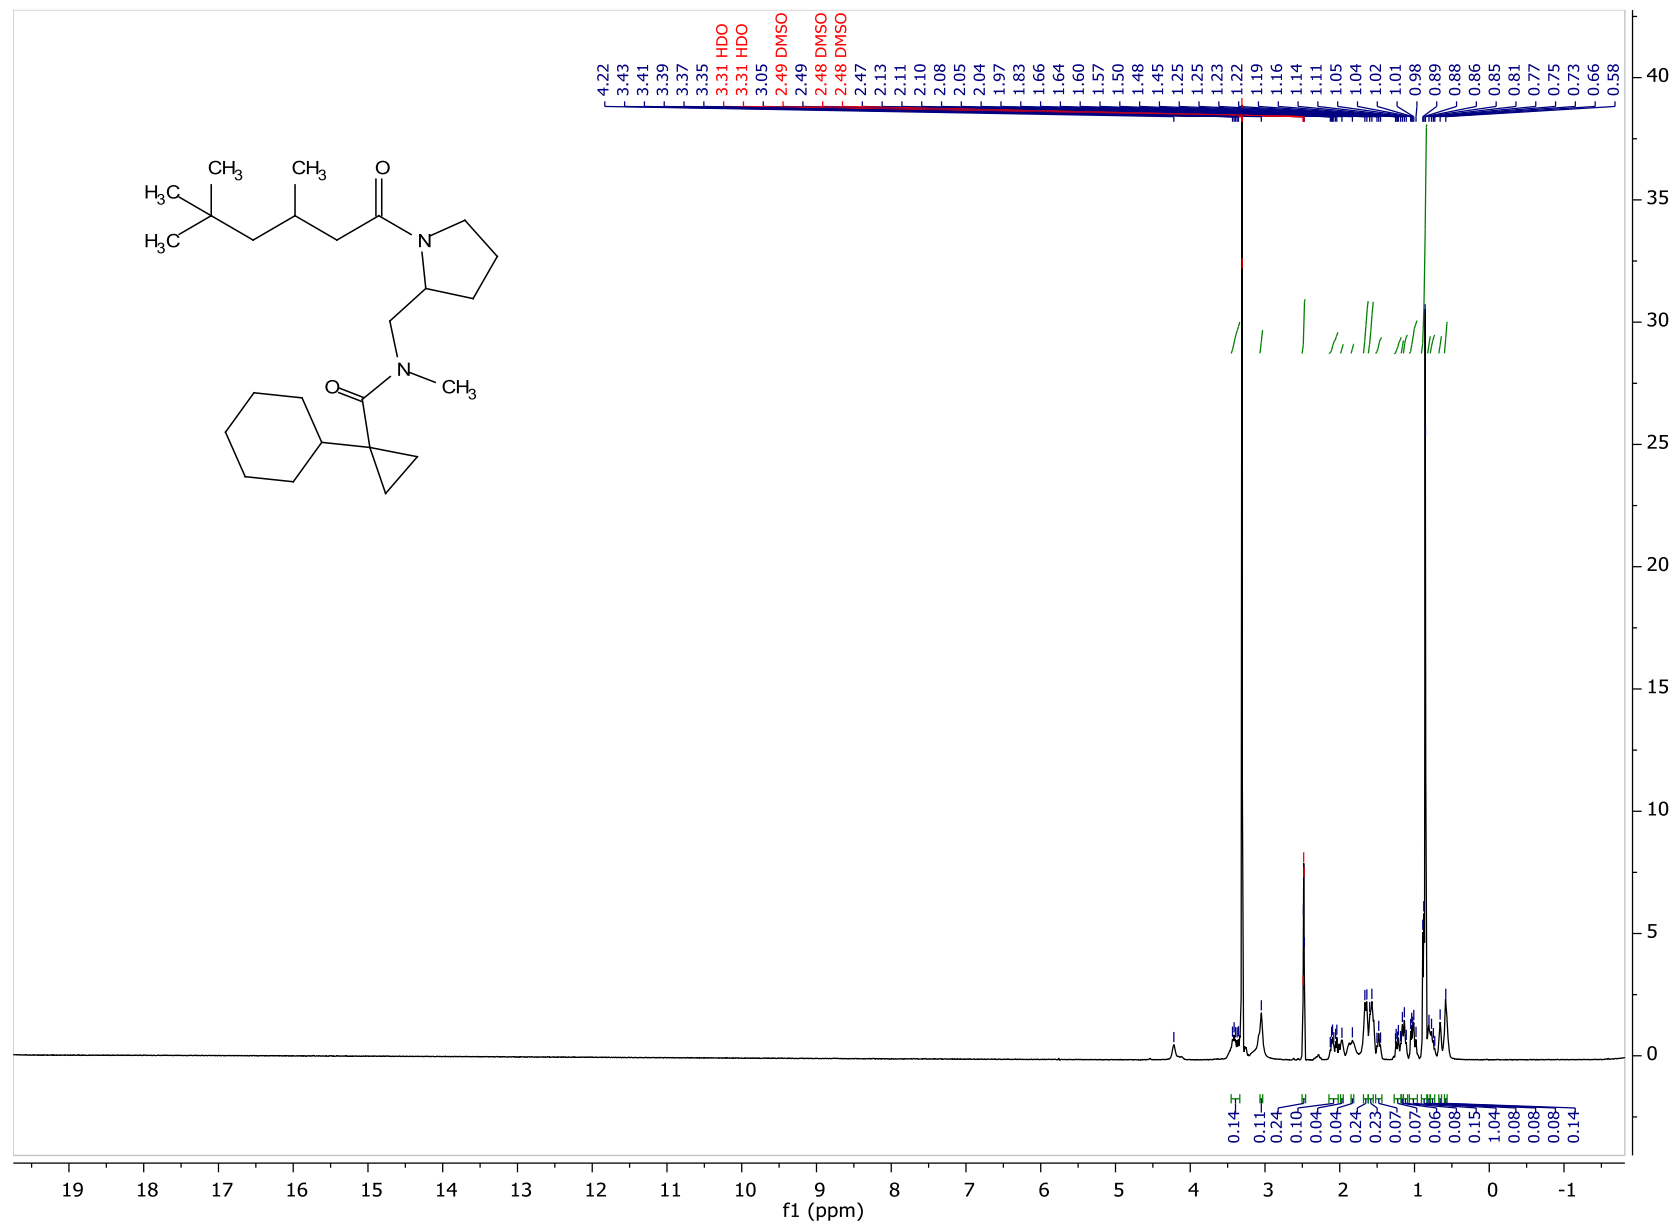

<sup>13</sup>C NMR spectrum of Z4886818613

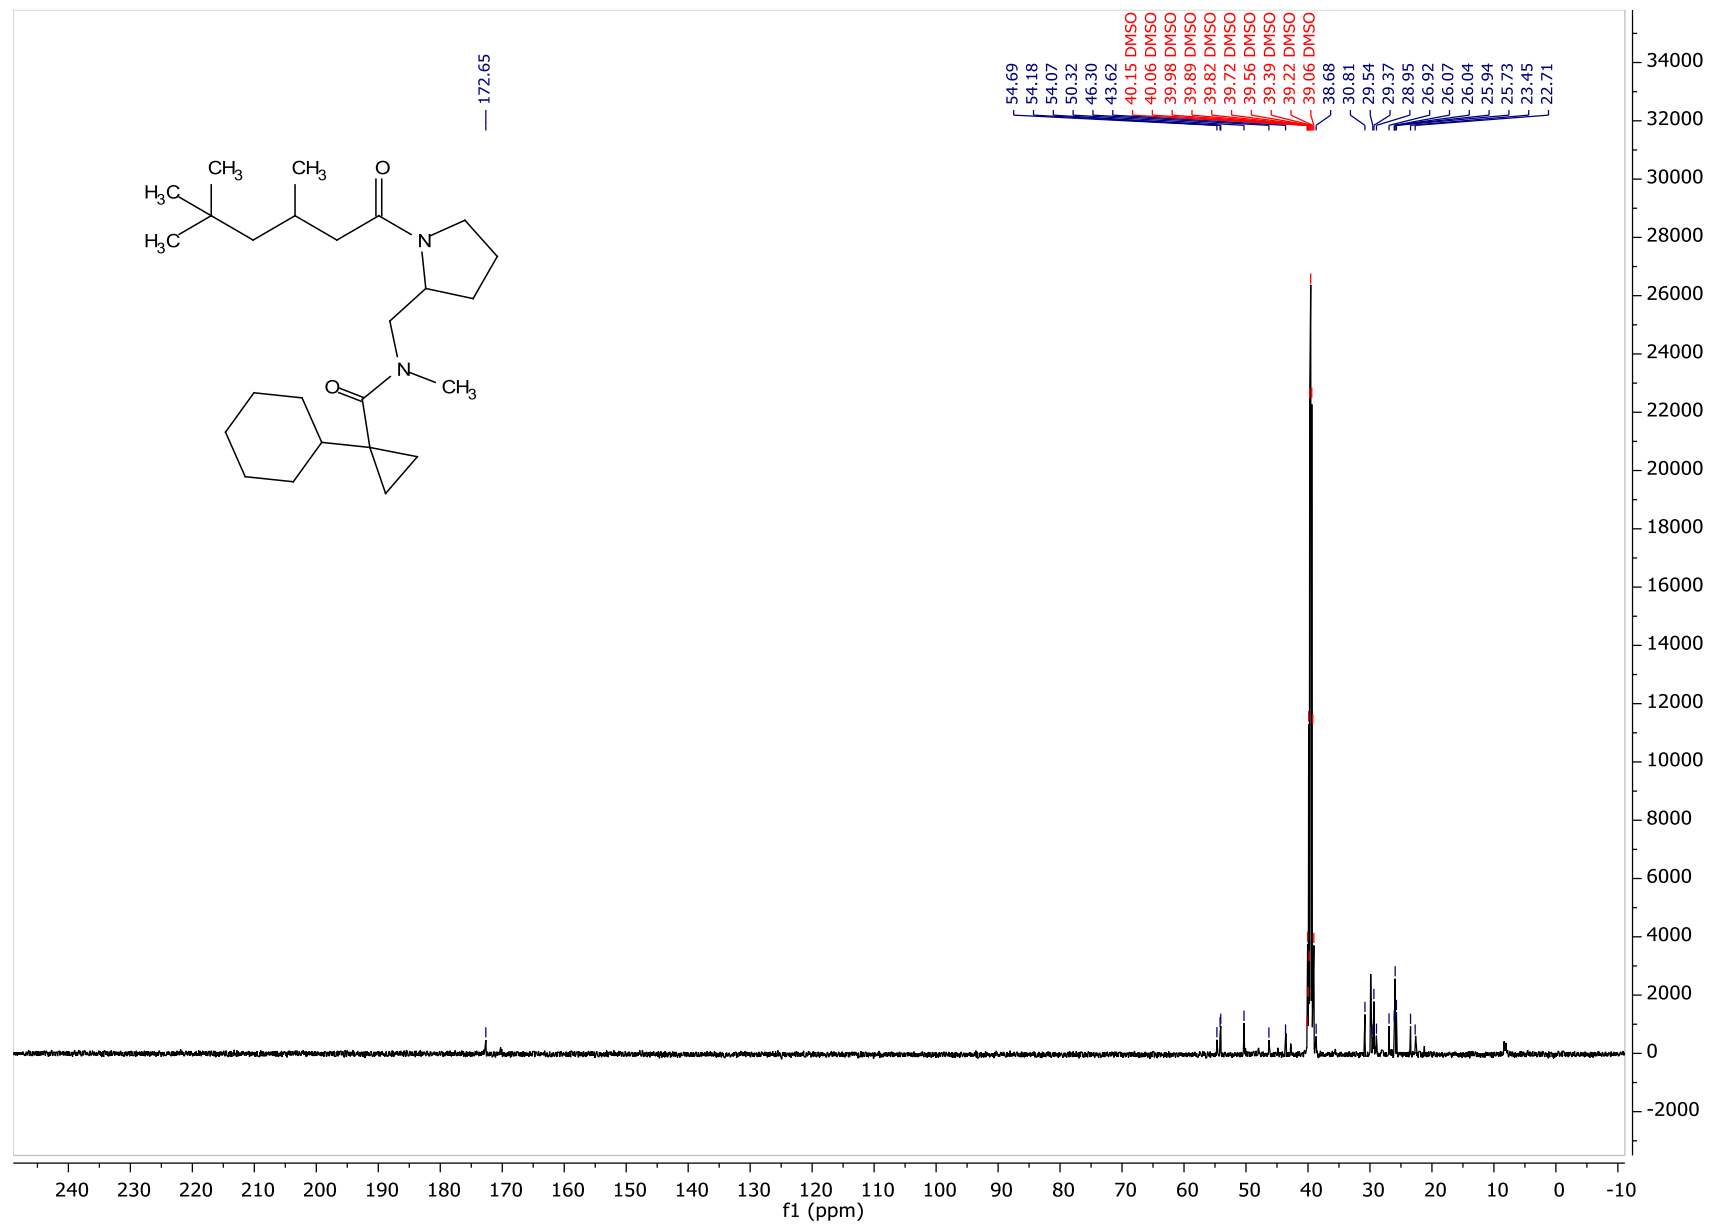

LC/MS spectrum of Z4886818613

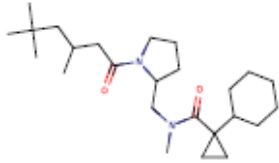

Mol Wt 404.63  
 Exact Mass 404.42

| # | Time  | Area%  |
|---|-------|--------|
| 1 | 1.697 | 100.00 |

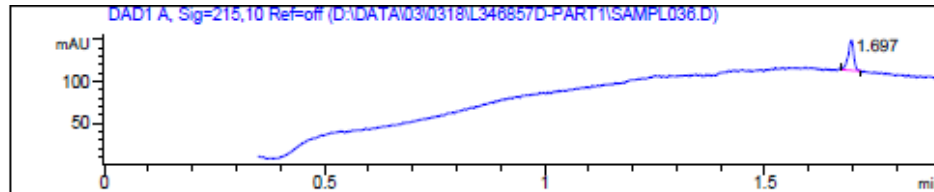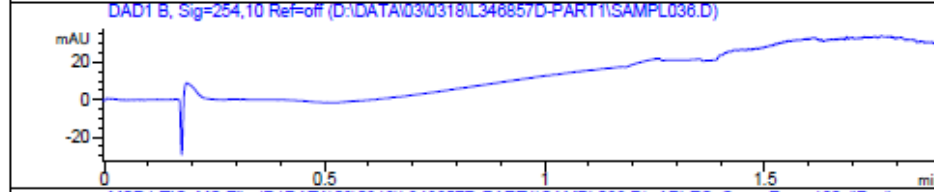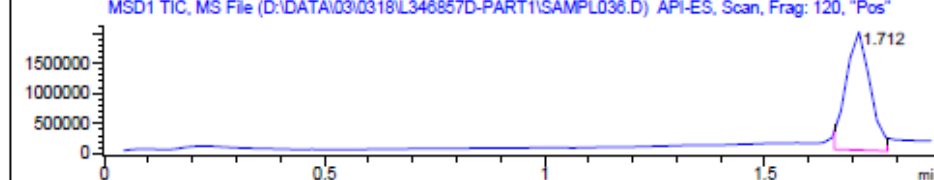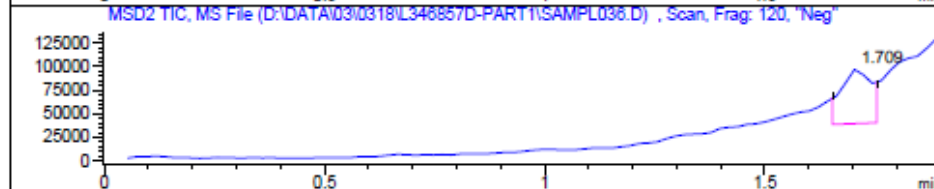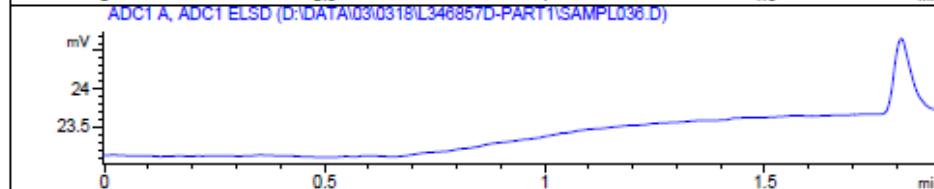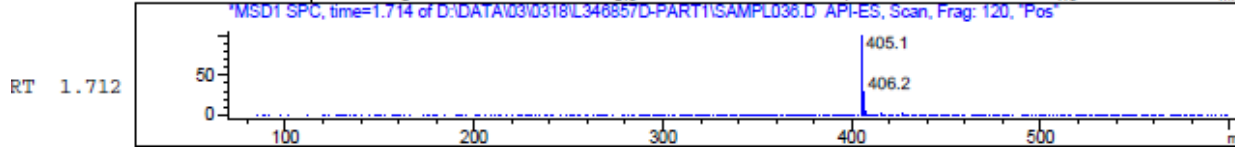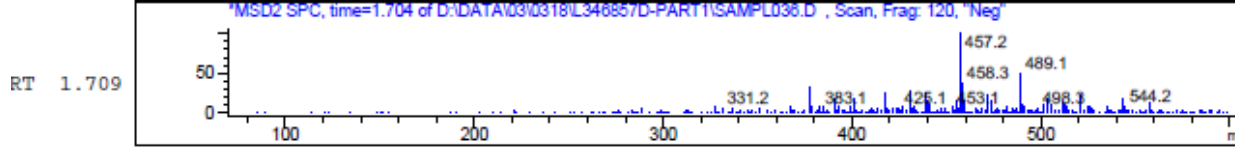

<sup>1</sup>H NMR spectrum of Z4886818614

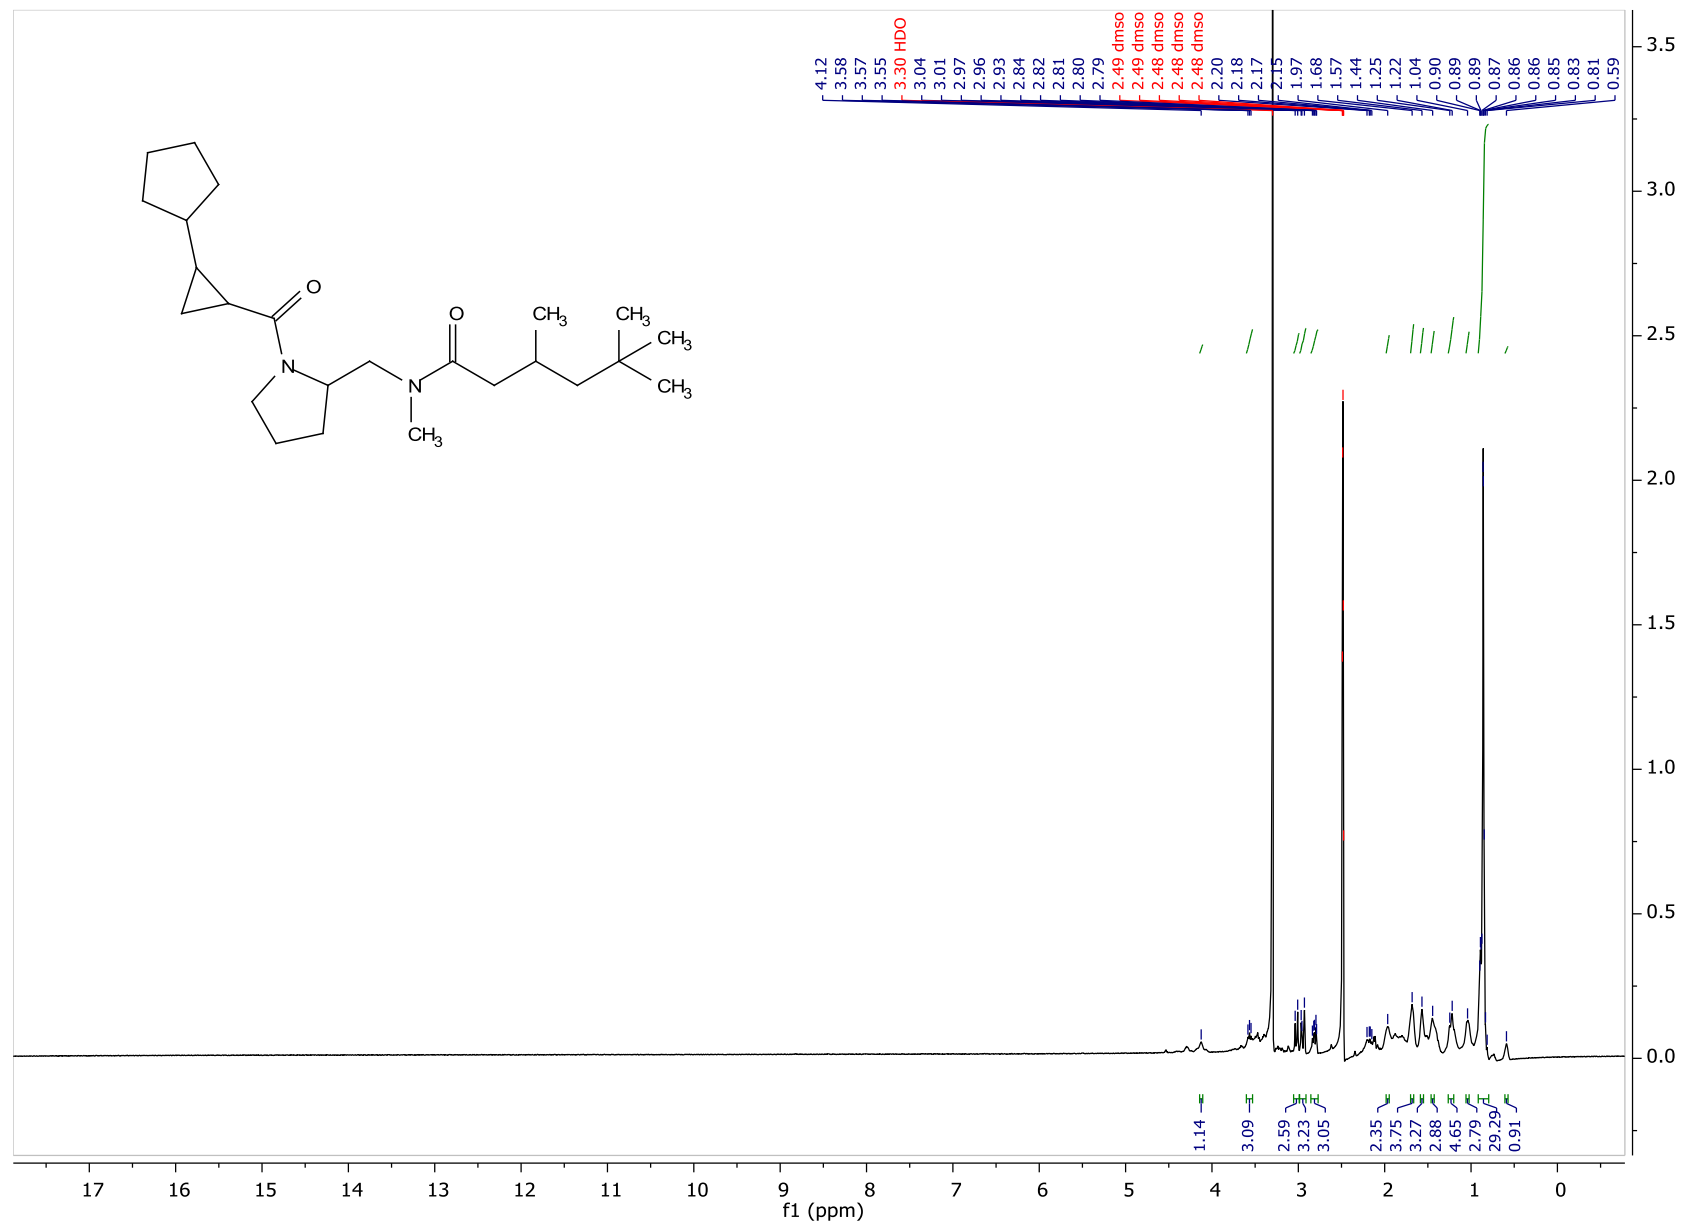

LC/MS spectrum of Z4886818614

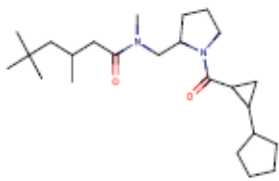

Mol Wt 390.6  
 Exact Mass 390.4

| # | Time  | Area%  |
|---|-------|--------|
| 1 | 1.601 | 100.00 |

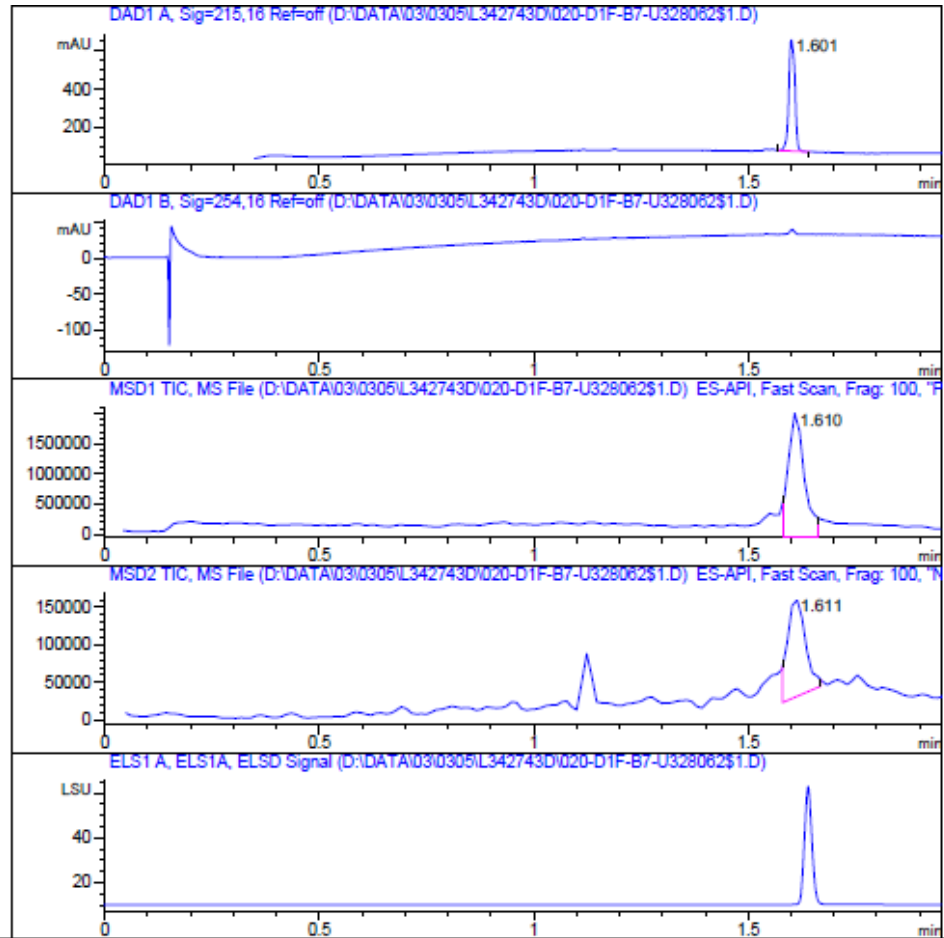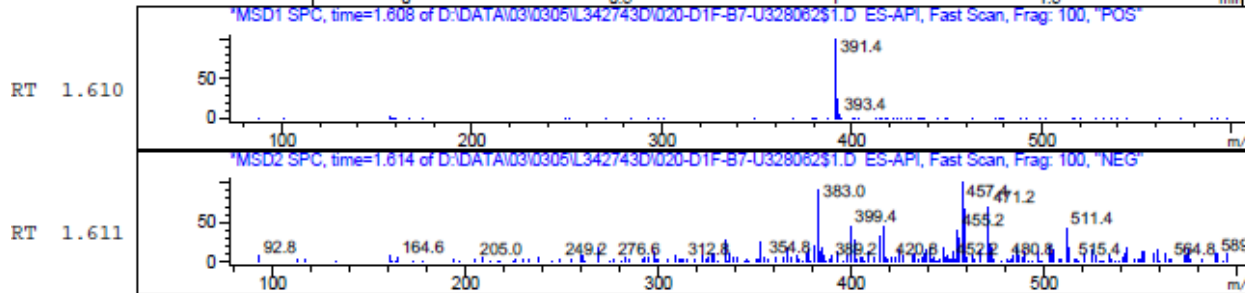

<sup>1</sup>H NMR spectrum of Z4886818620

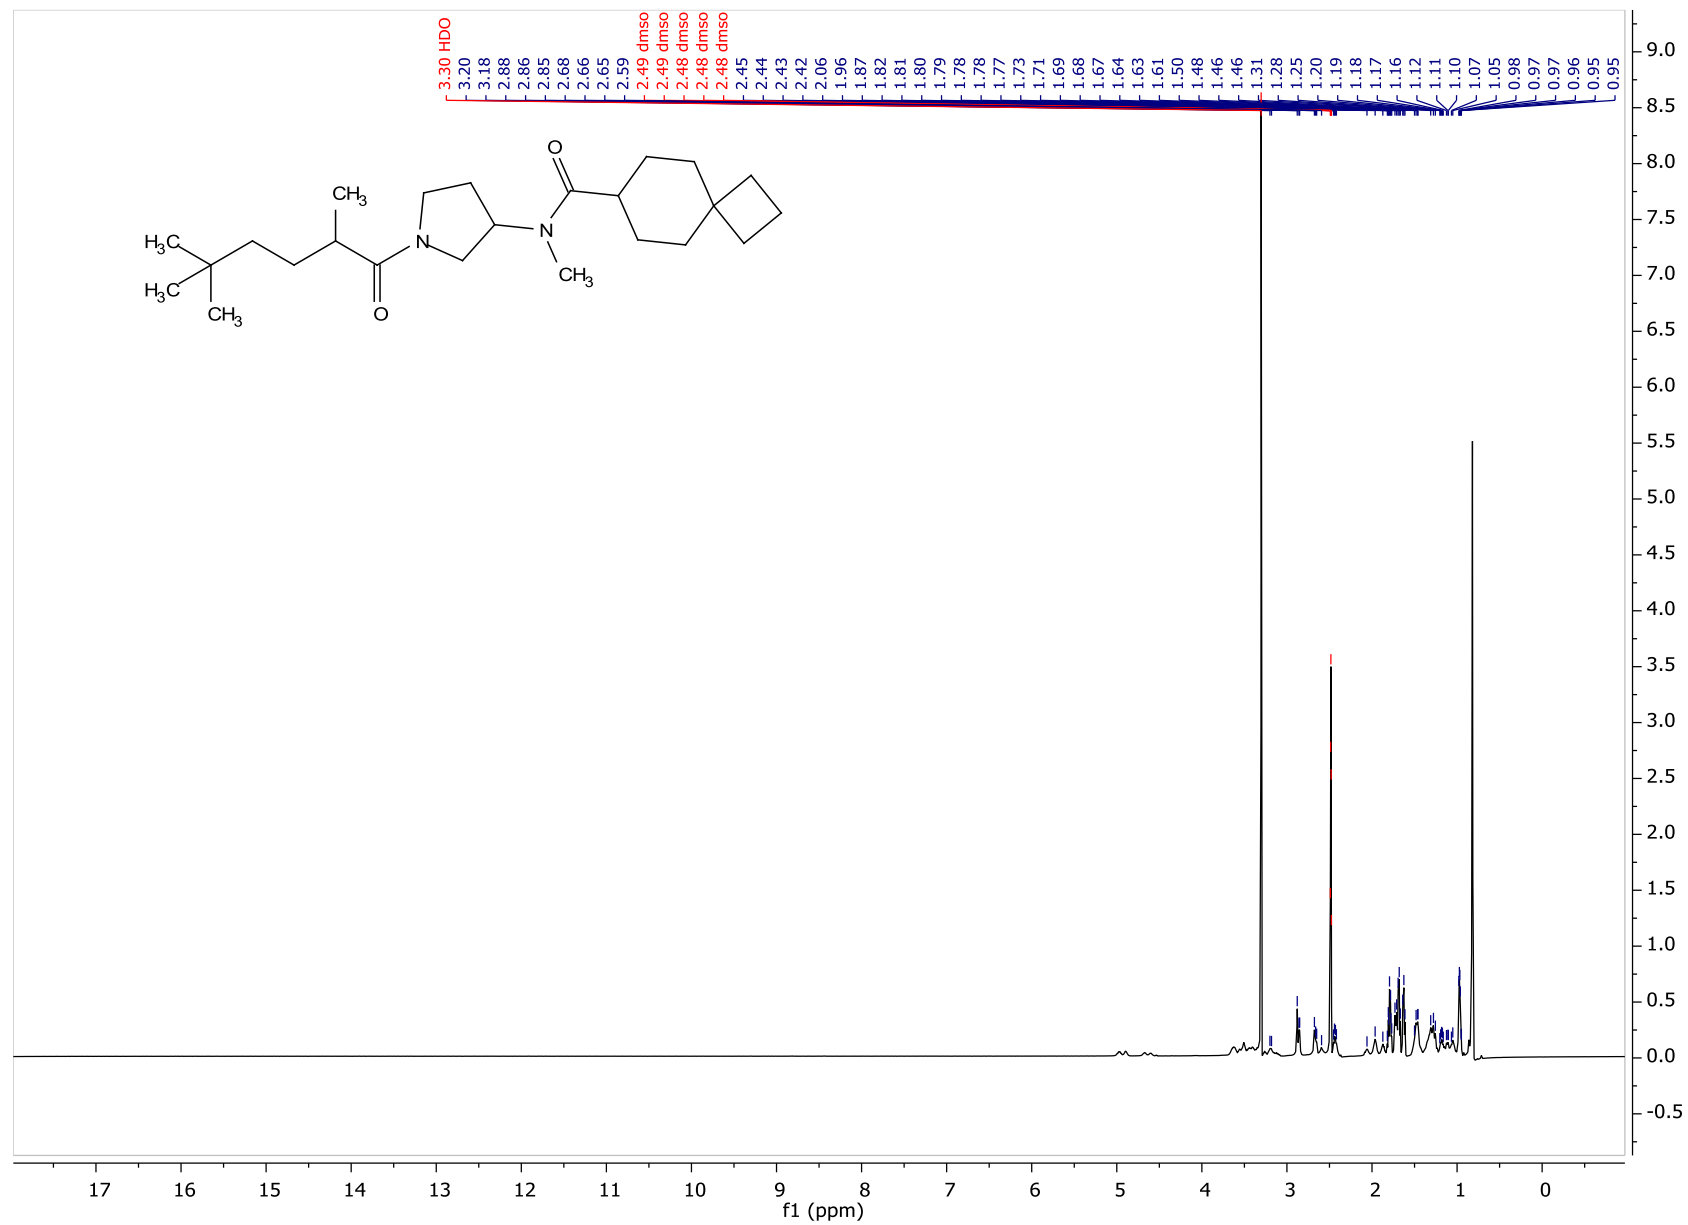

<sup>13</sup>C NMR spectrum of Z4886818620

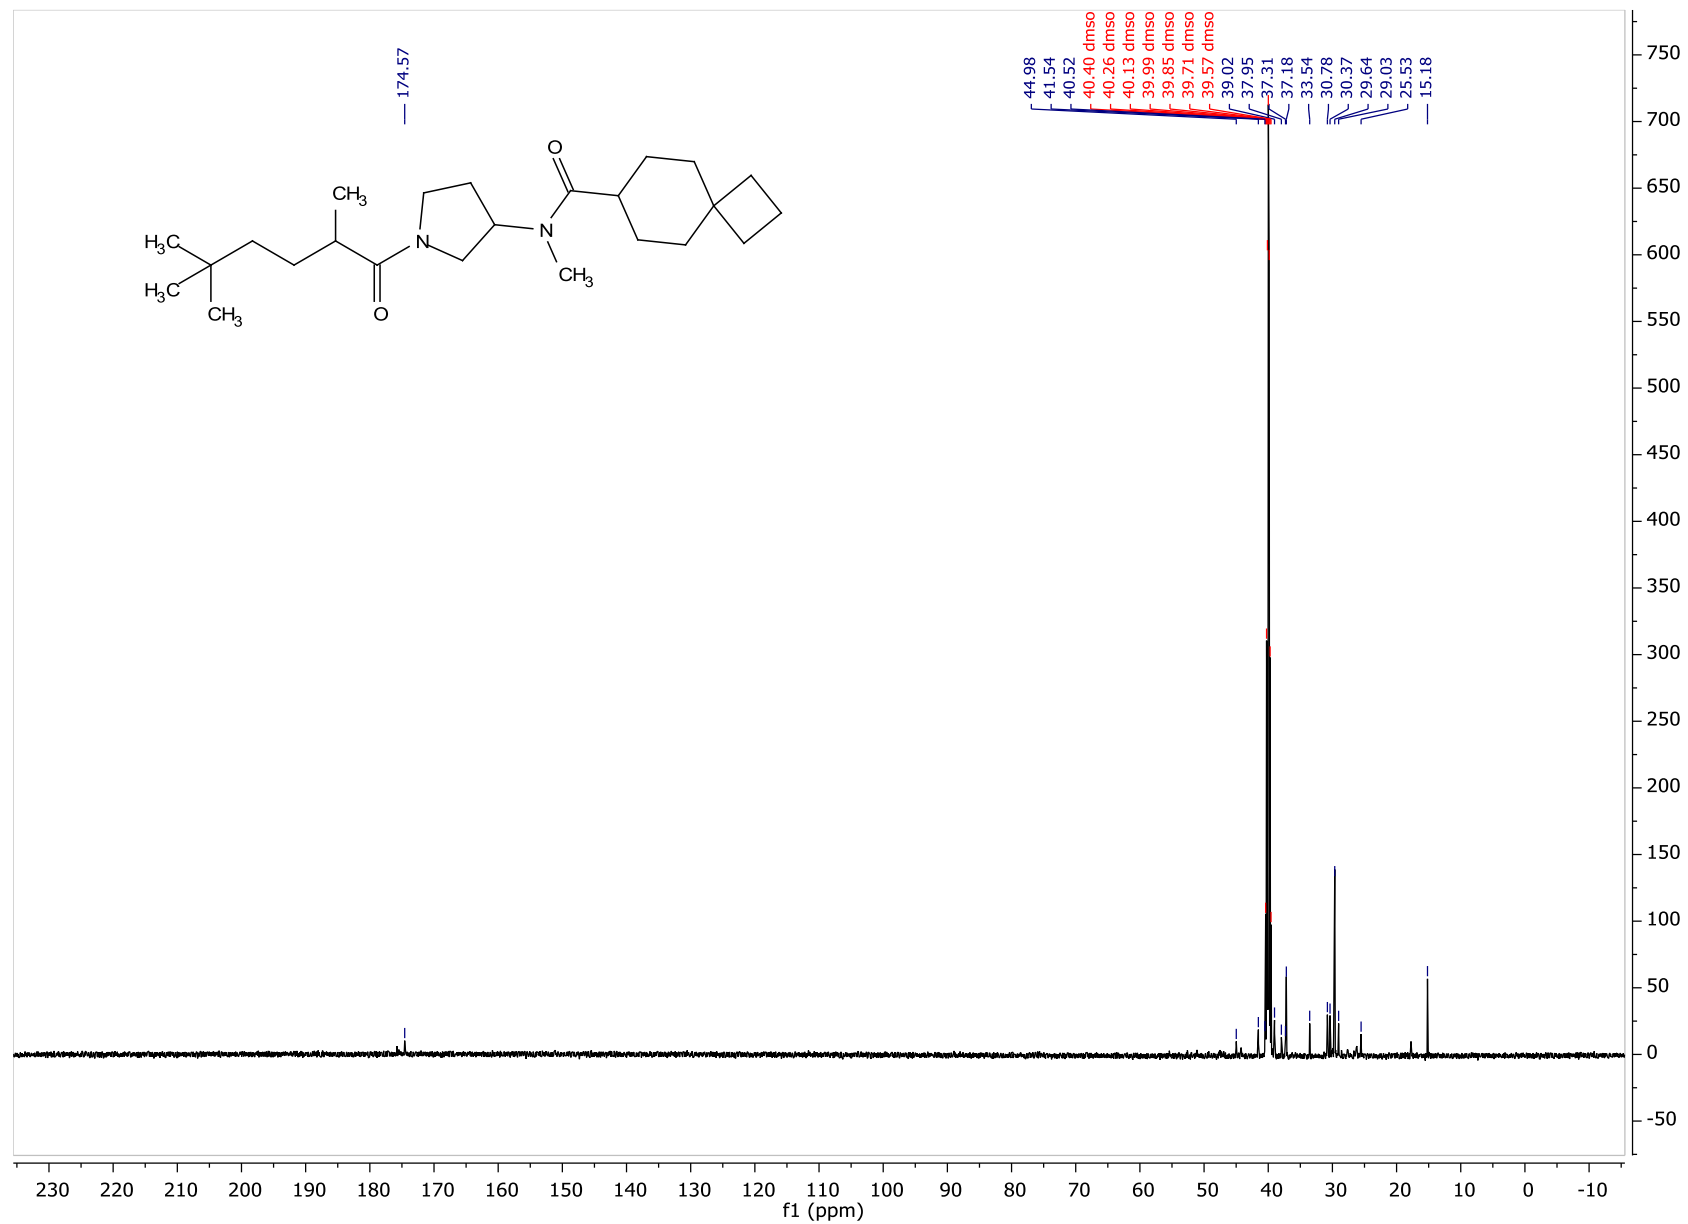

LC/MS spectrum of Z4886818620

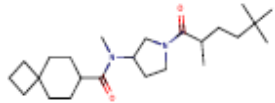

Mol Wt 390.6  
 Exact Mass 390.4

| # | Time  | Area%  |
|---|-------|--------|
| 1 | 1.582 | 100.00 |

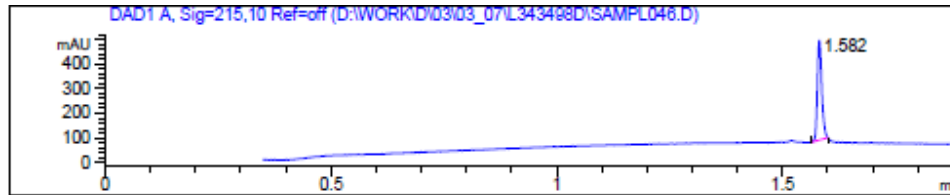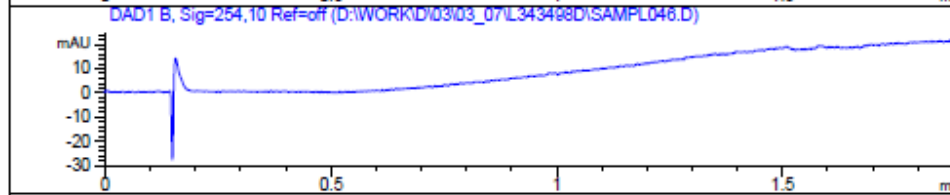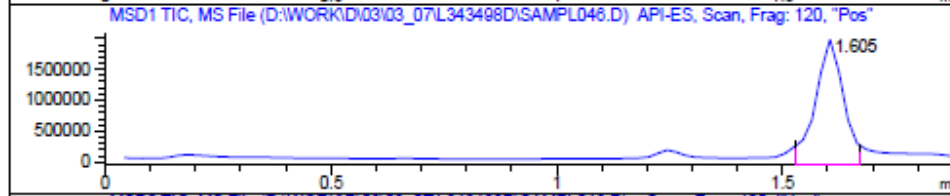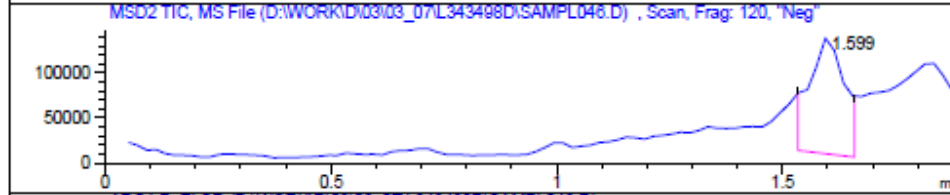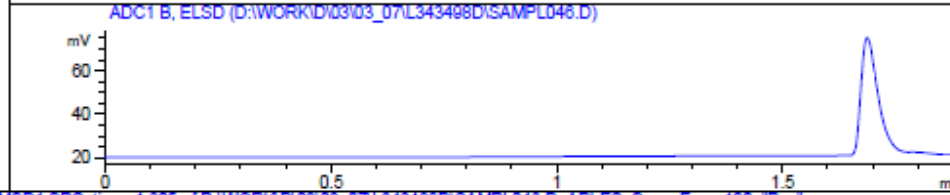

RT 1.605

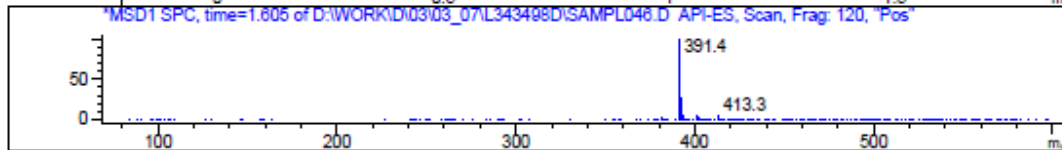

RT 1.599

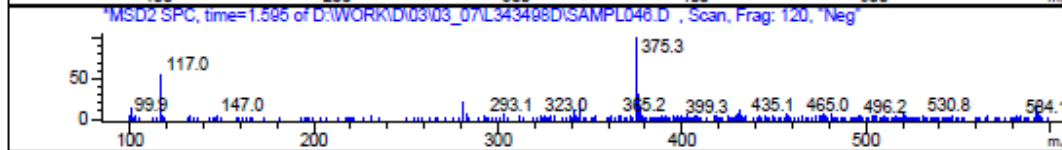



<sup>1</sup>H NMR spectrum of Z4886818621

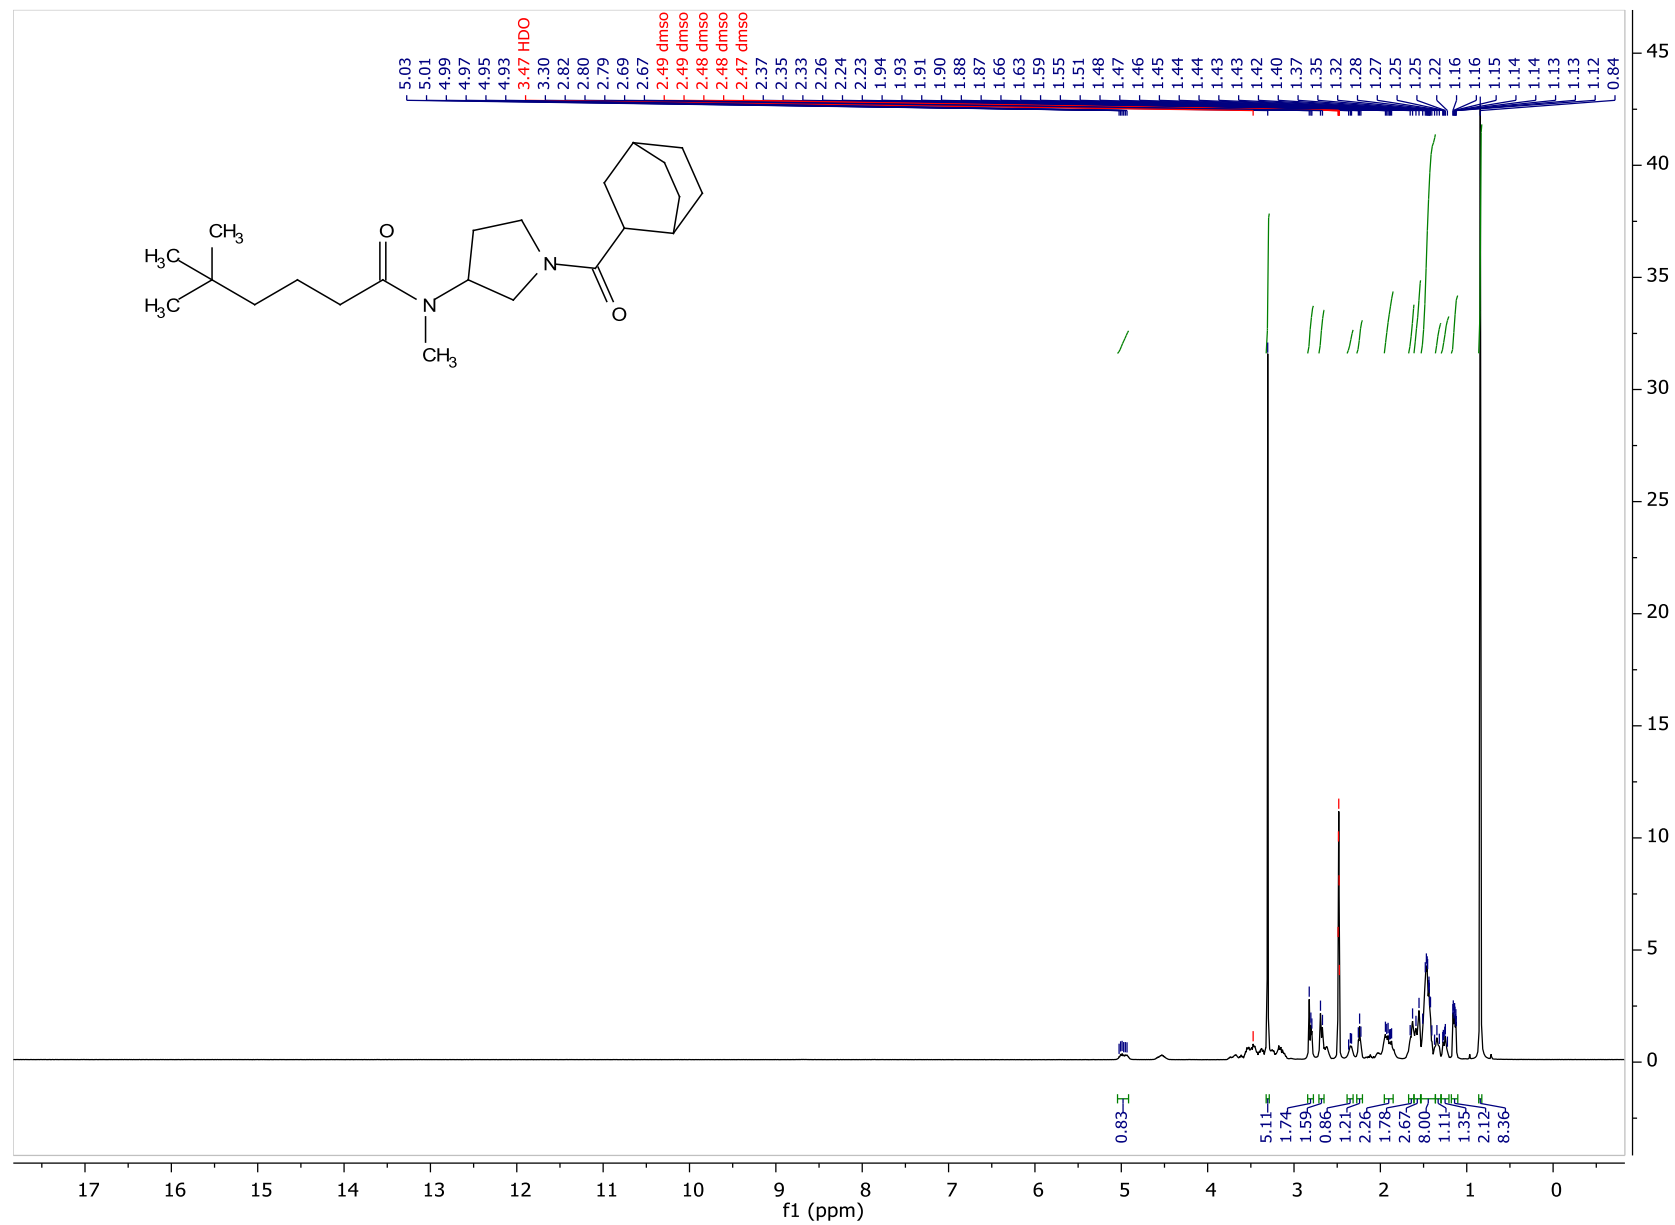

<sup>13</sup>C NMR spectrum of Z4886818621

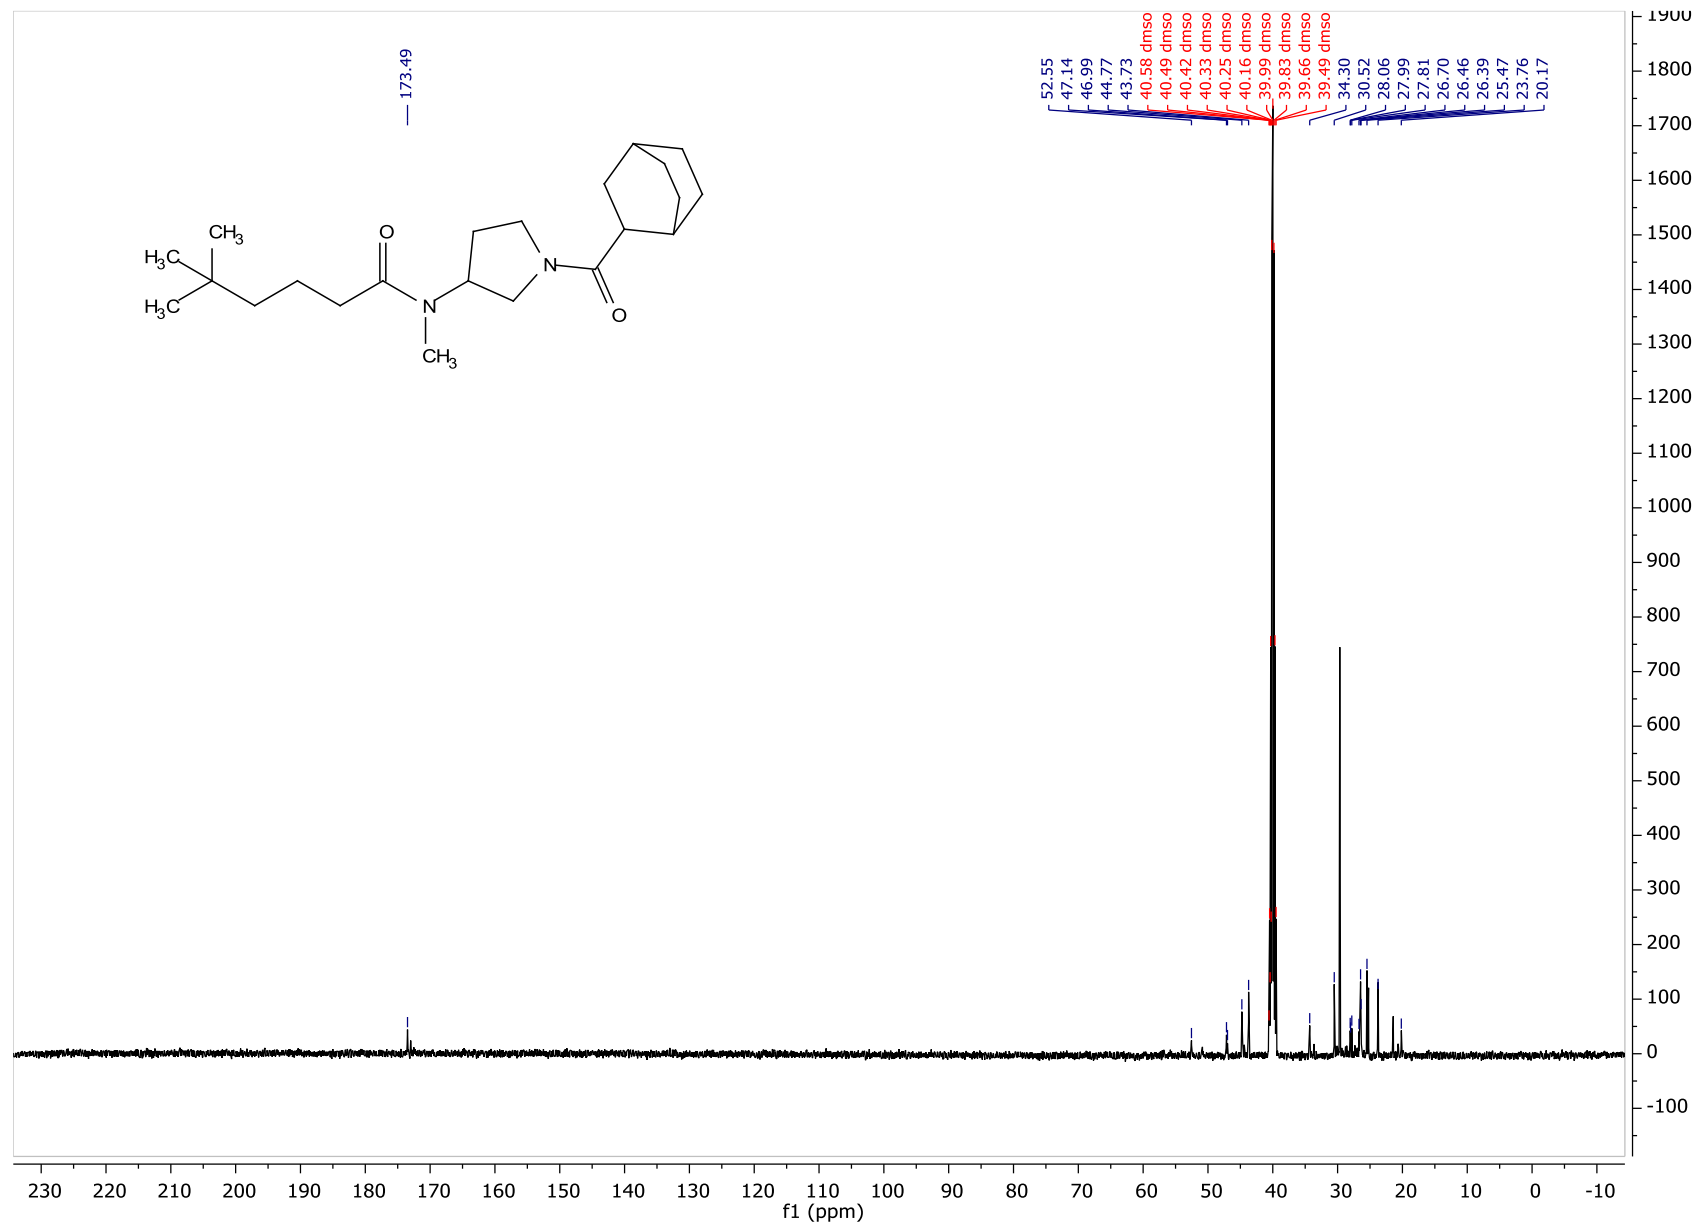

LC/MS spectrum of Z4886818621

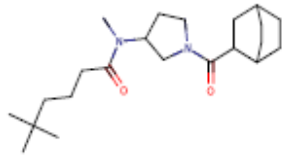

Mol Wt 362.55  
Exact Mass 362.36

| # | Time  | Area%  |
|---|-------|--------|
| 1 | 1.444 | 100.00 |

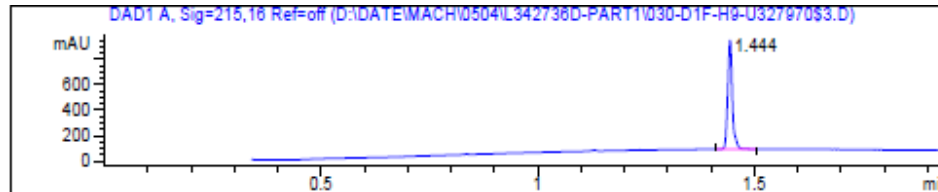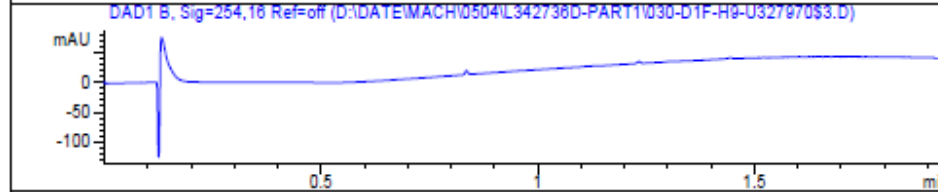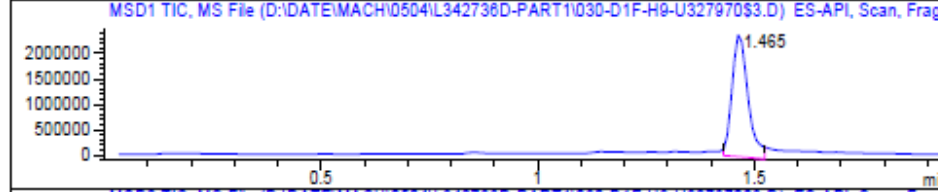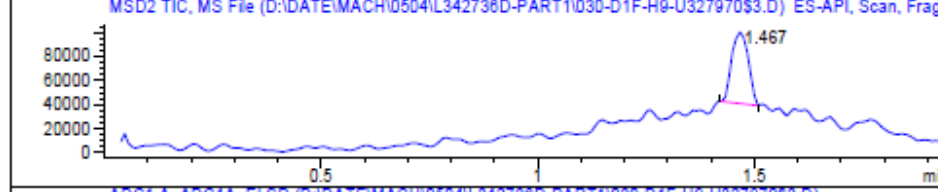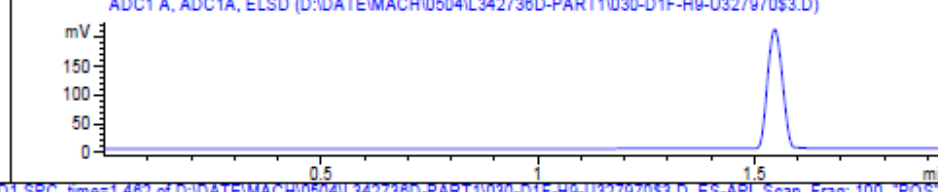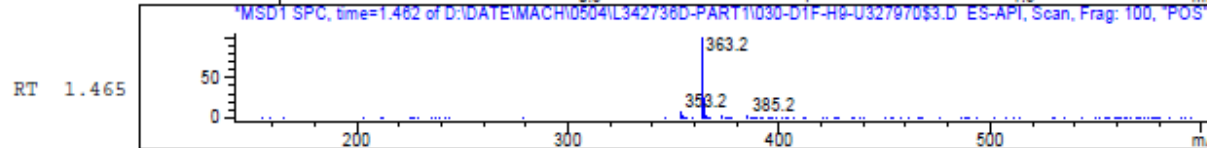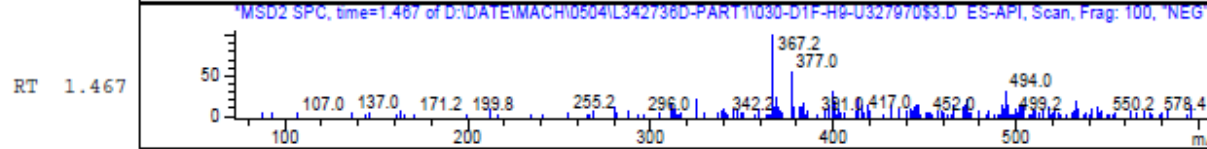

<sup>1</sup>H NMR spectrum of Z4886818622

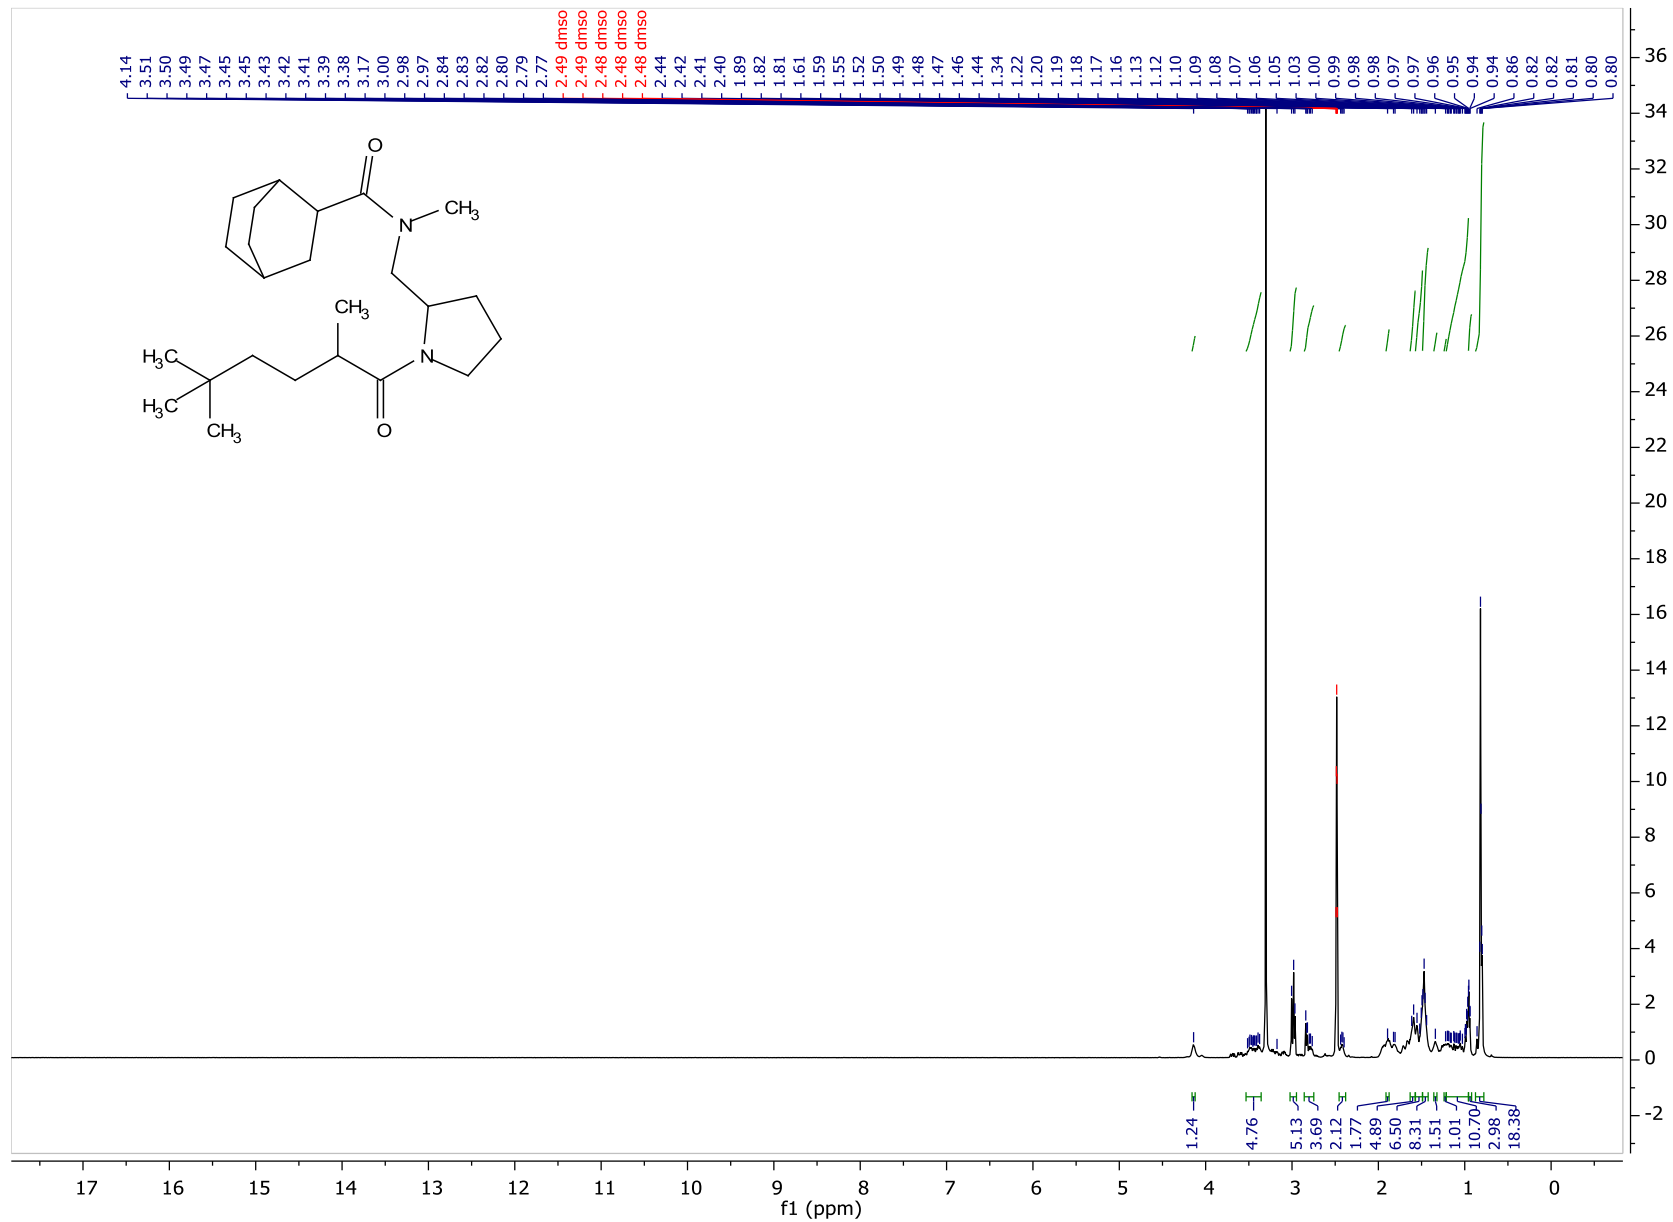

<sup>13</sup>C NMR spectrum of Z4886818622

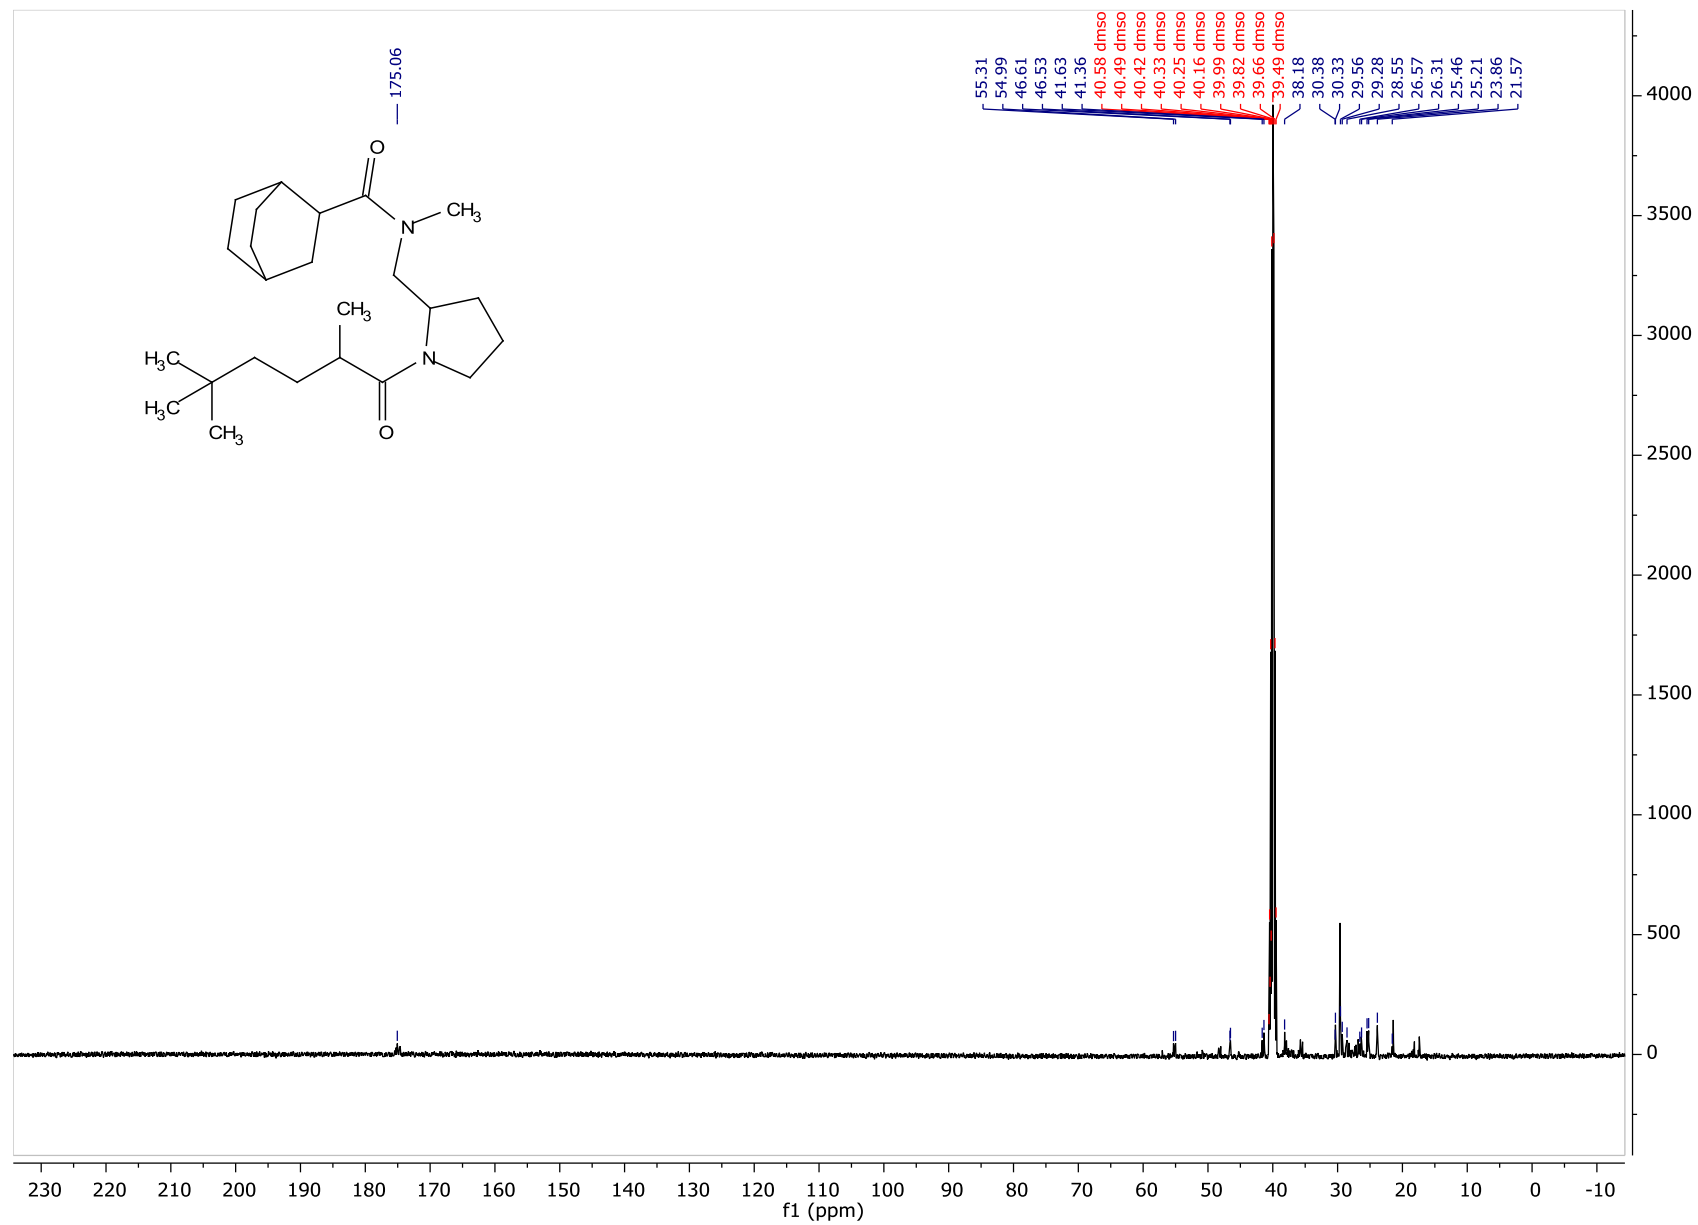

LC/MS spectrum of Z4886818622

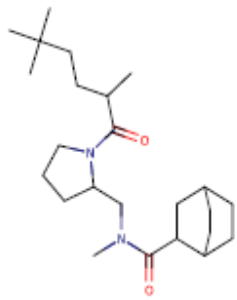

Mol Wt 390.6  
 Exact Mass 390.4

| # | Time  | Area%  |
|---|-------|--------|
| 1 | 1.499 | 100.00 |

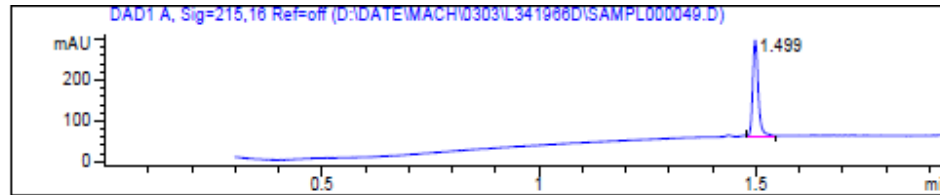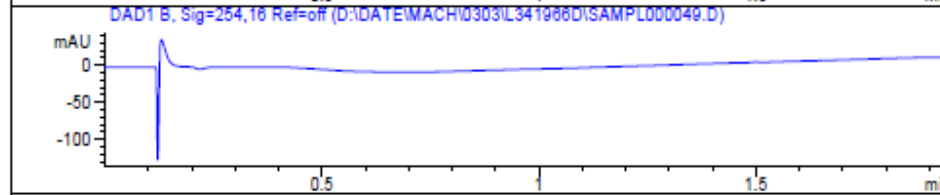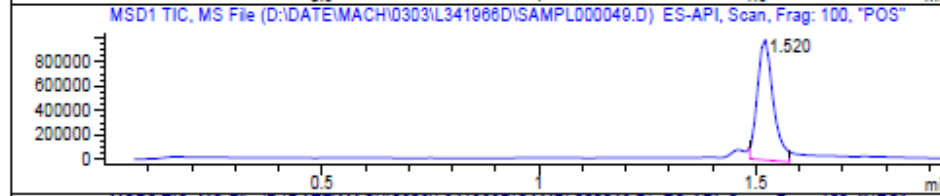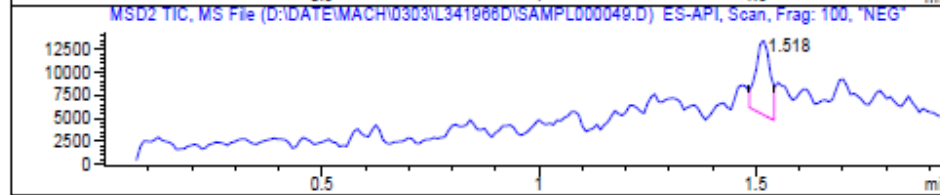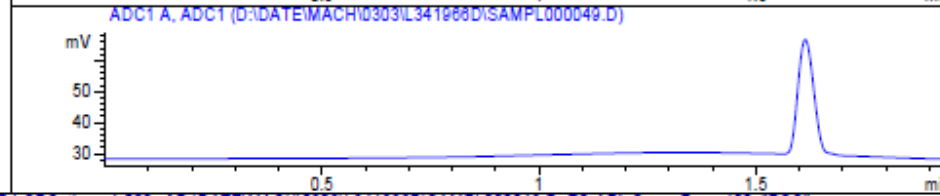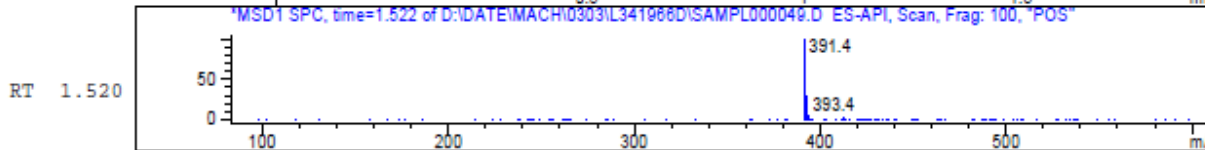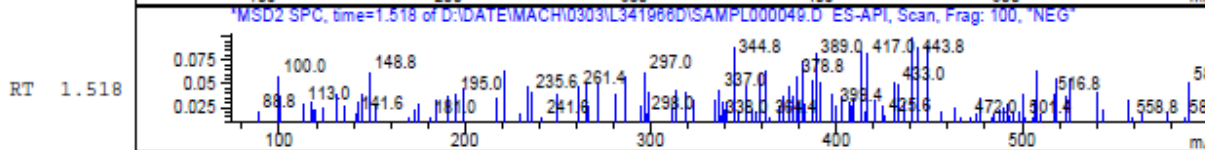

<sup>1</sup>H NMR spectrum of Z4886818625

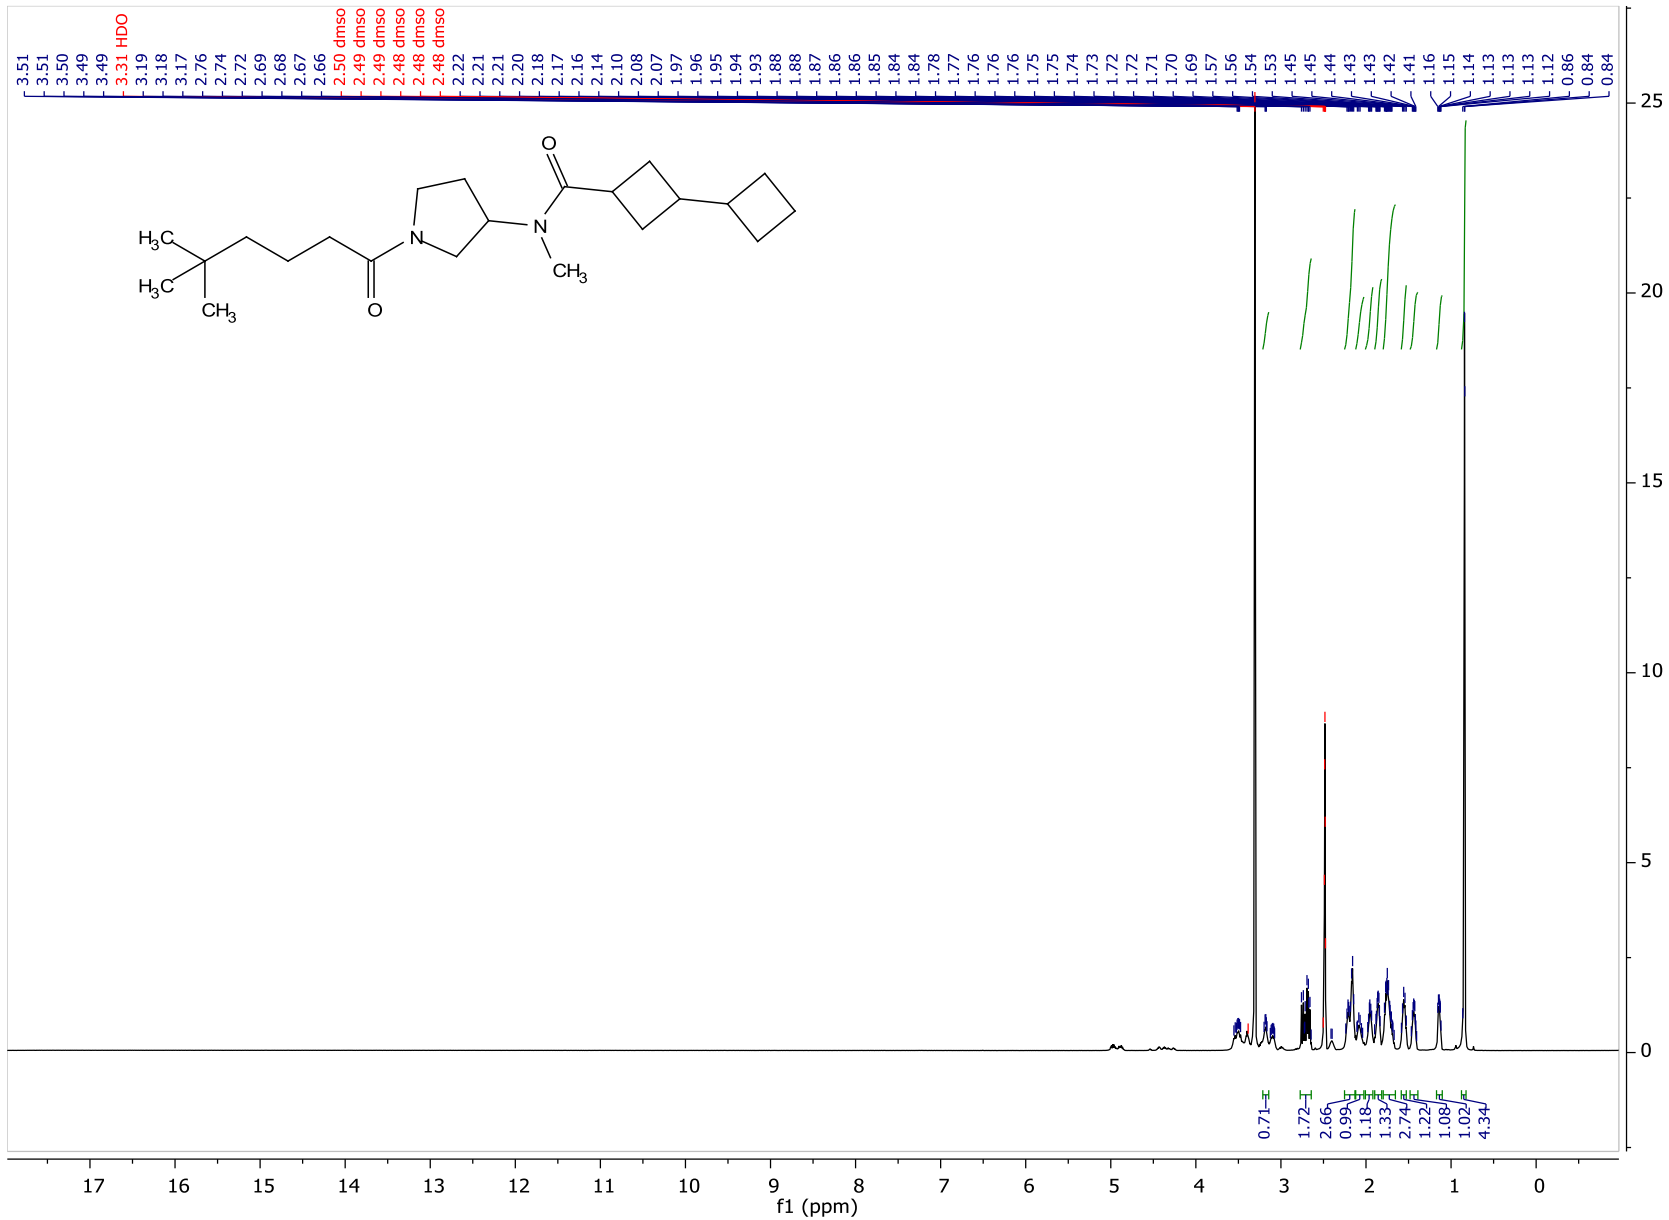

<sup>13</sup>C NMR spectrum of Z4886818625

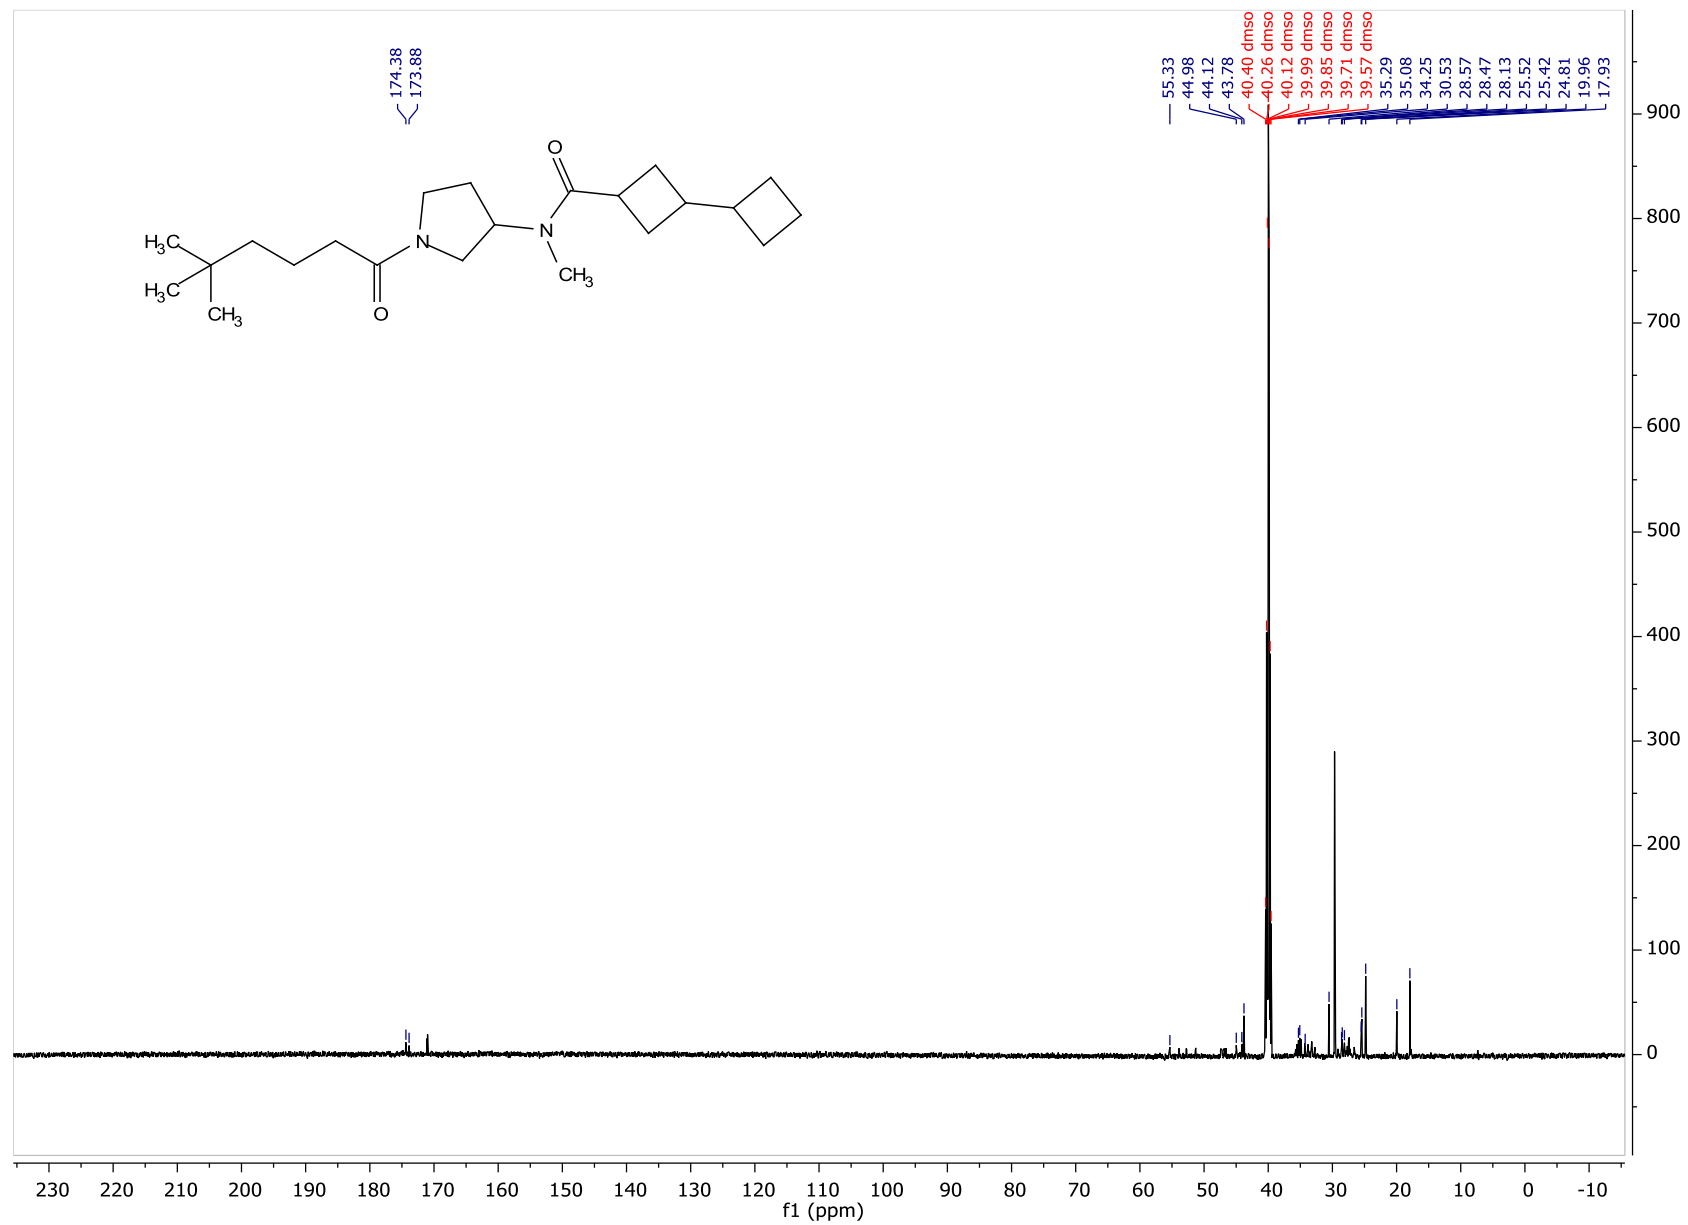



LC/MS spectrum of Z4886818625

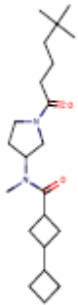

Mol Wt 362.55  
 Exact Mass 362.36

| # | Time  | Area% |
|---|-------|-------|
| 1 | 1.227 | 3.82  |
| 2 | 1.611 | 96.18 |

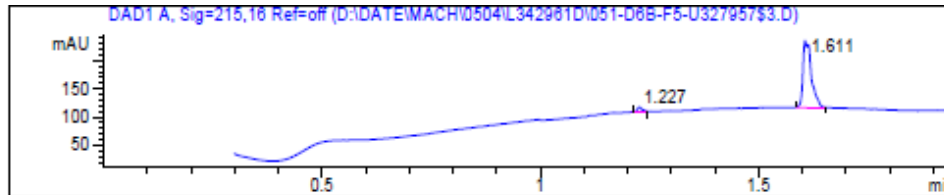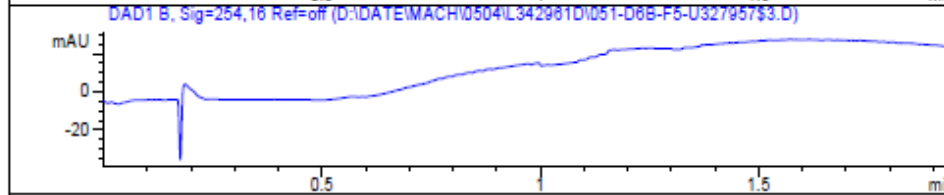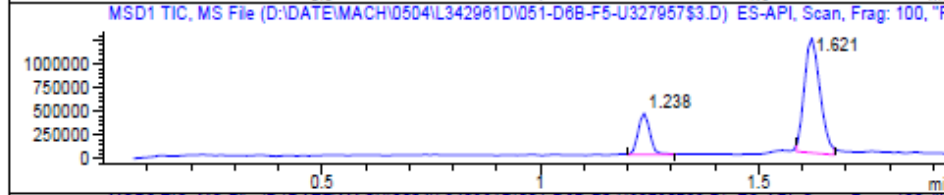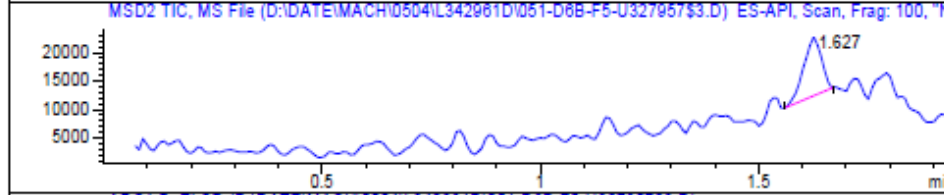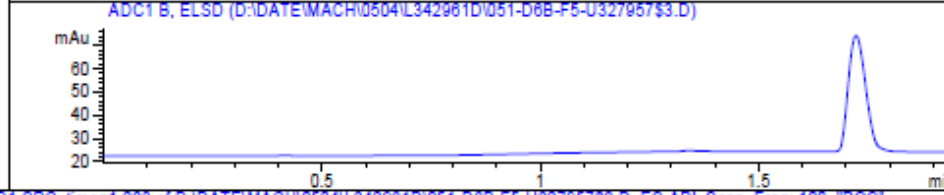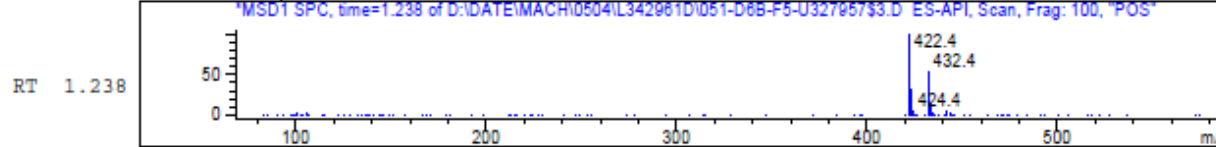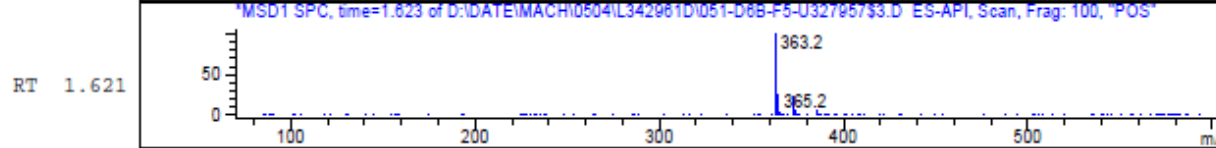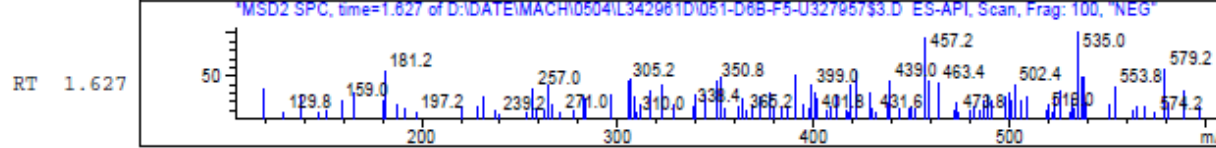

<sup>1</sup>H NMR spectrum of Z4886818631

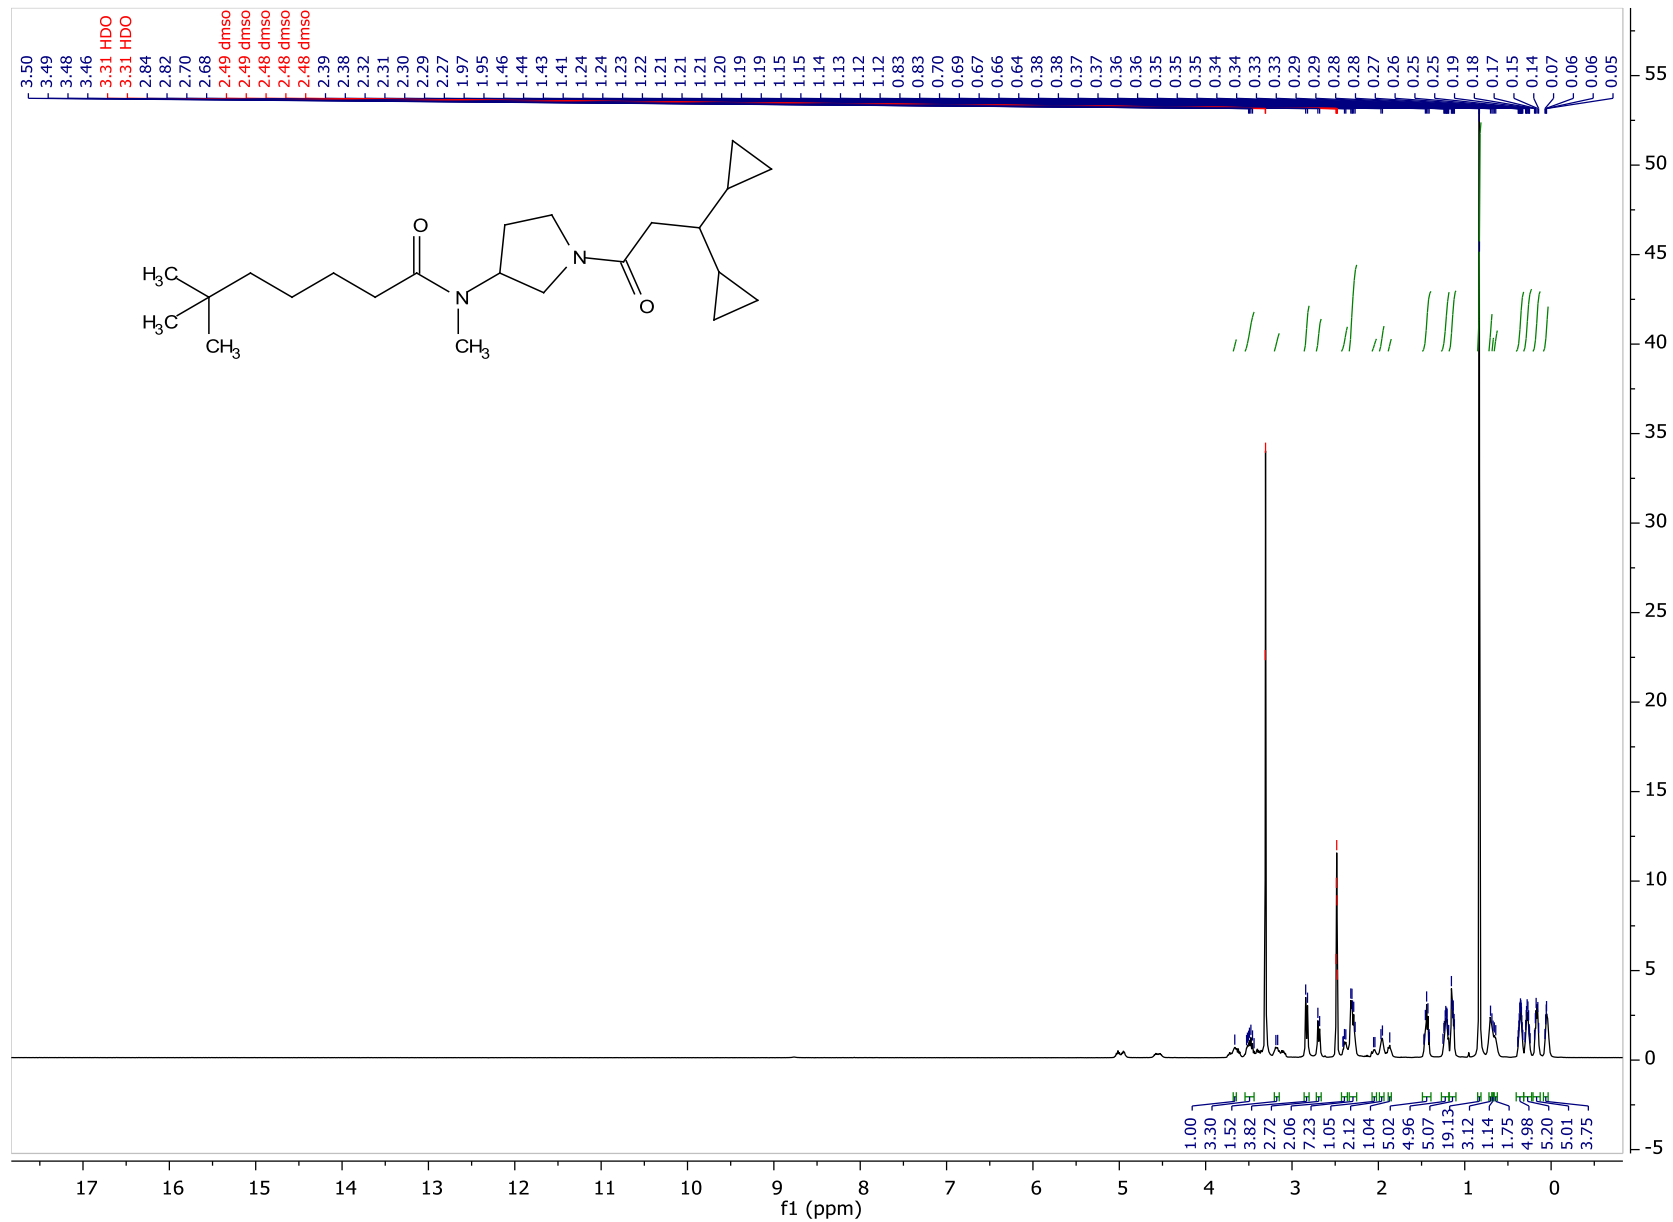

<sup>13</sup>C NMR spectrum of Z4886818631

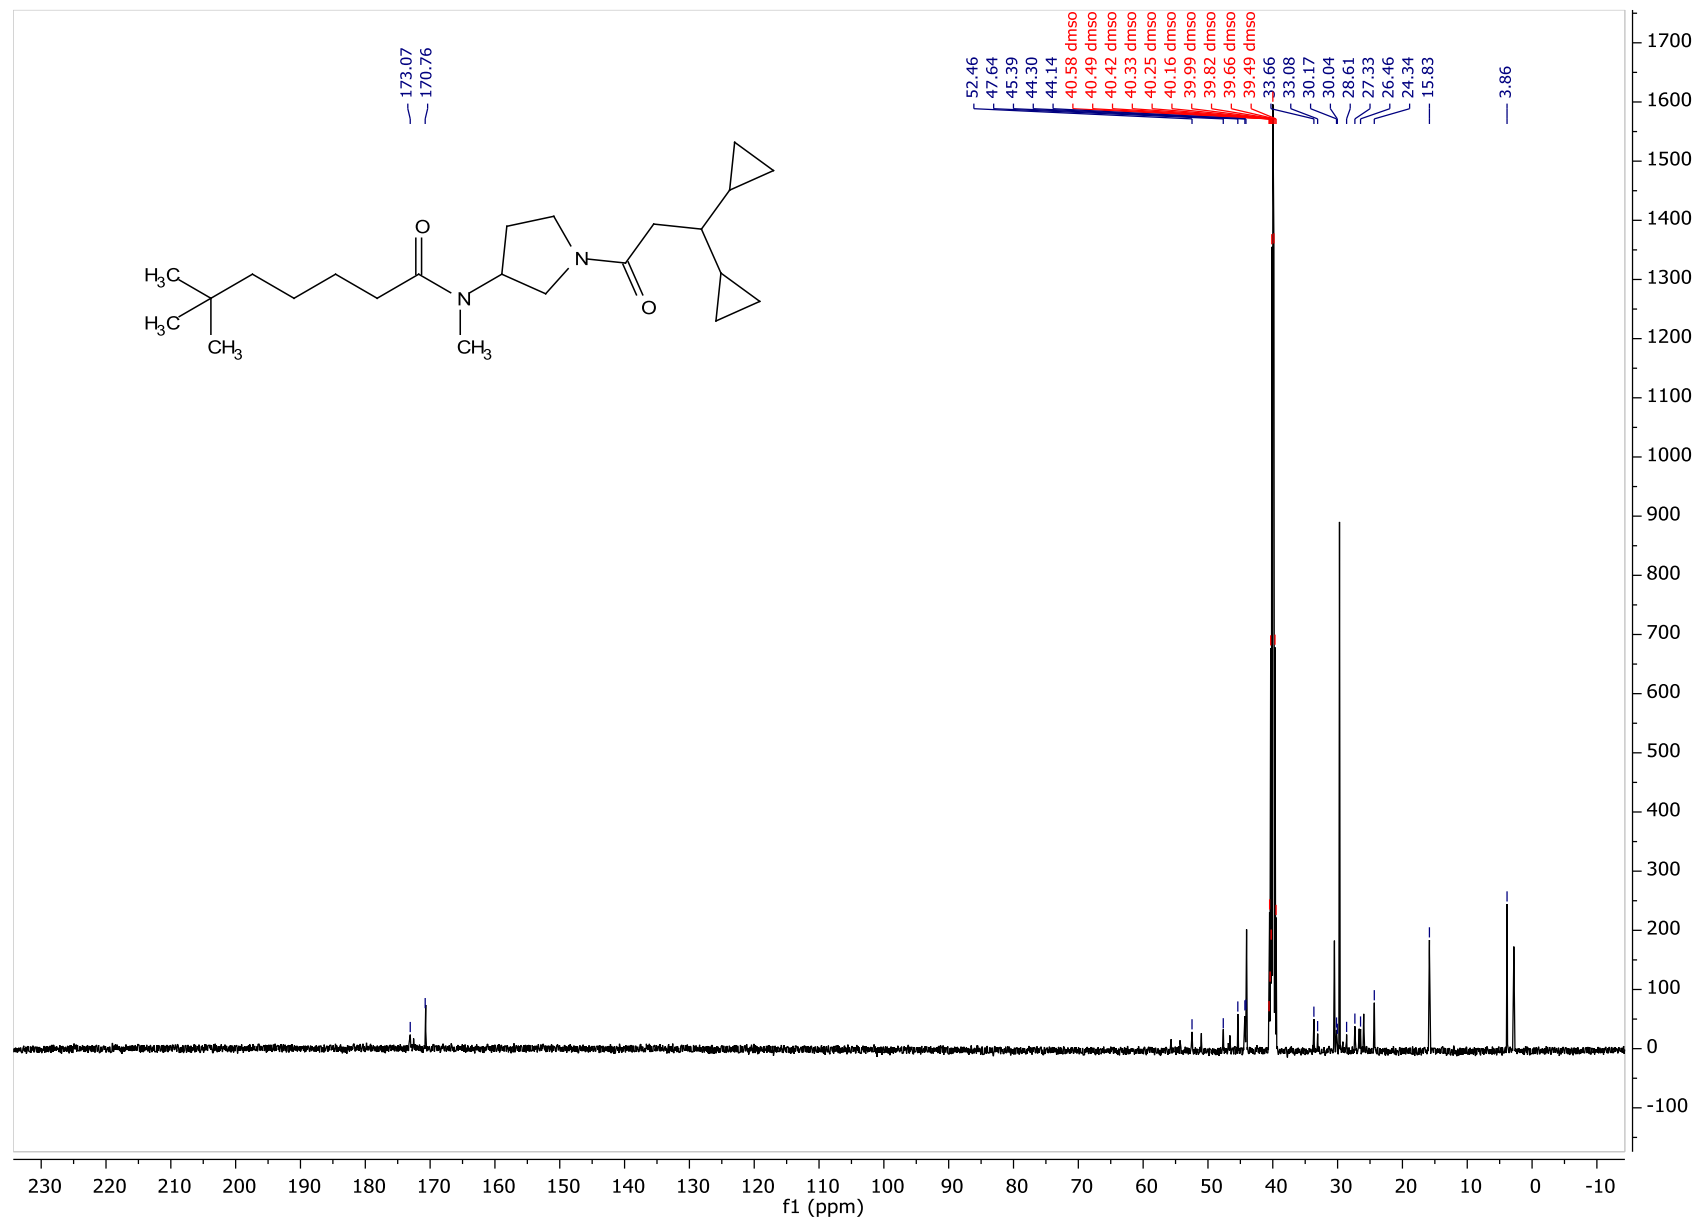

LC/MS spectrum of Z4886818631

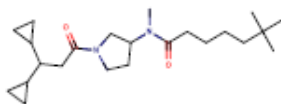

Mol Wt 376.58

Exact Mass 376.38

| # | Time  | Area% |
|---|-------|-------|
| 1 | 1.097 | 1.28  |
| 2 | 1.506 | 98.72 |

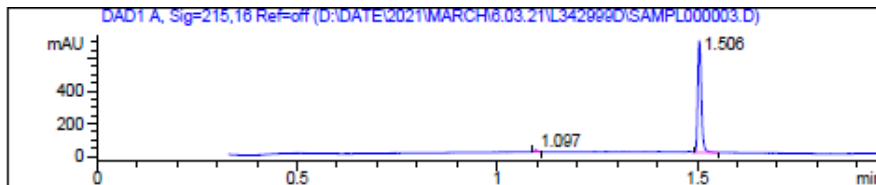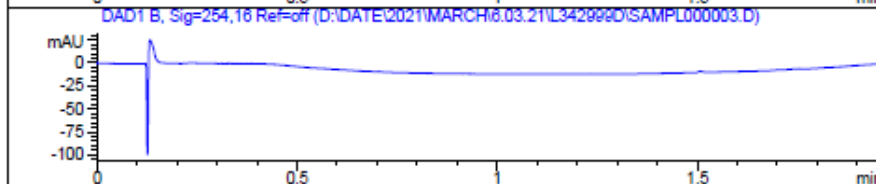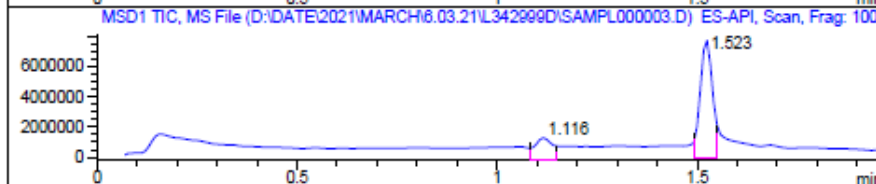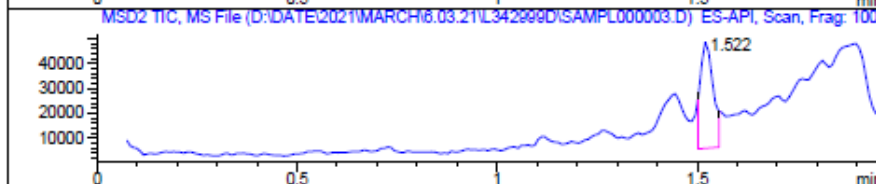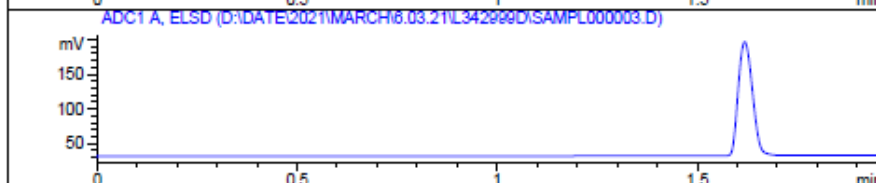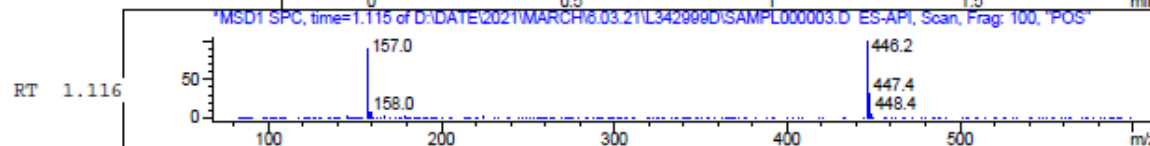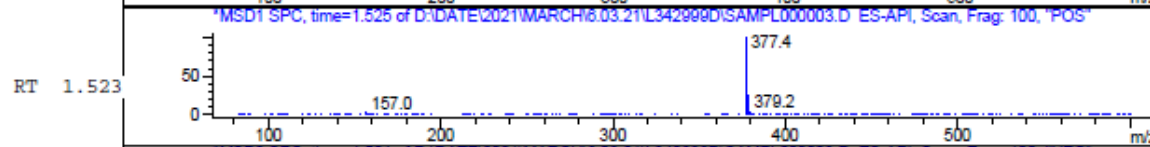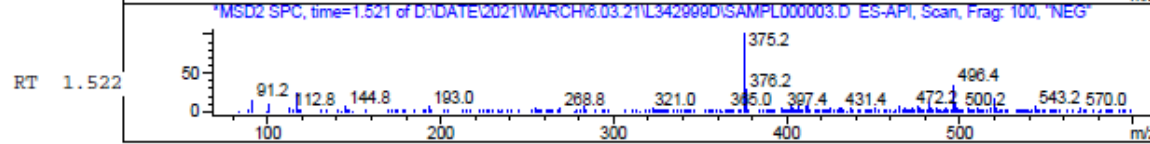

<sup>1</sup>H NMR spectrum of Z4886818632

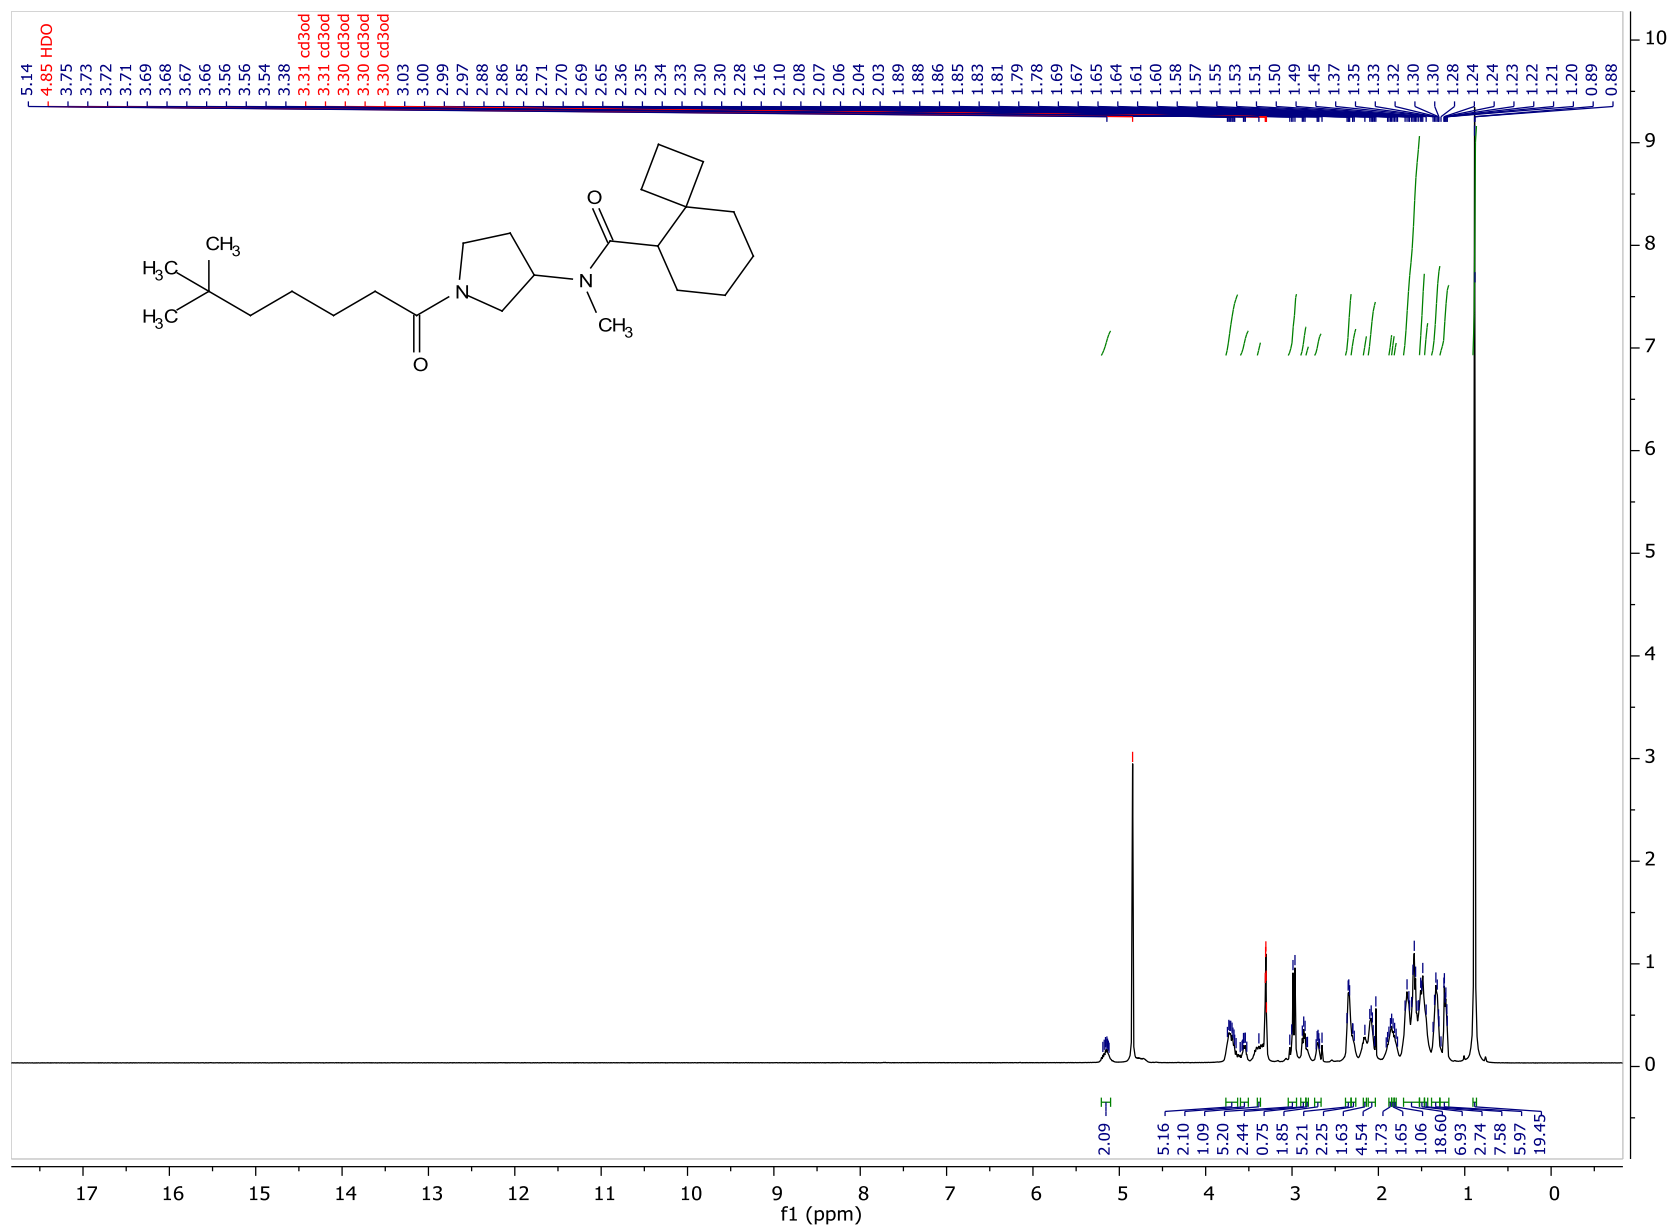

<sup>13</sup>C NMR spectrum of **Z4886818632**

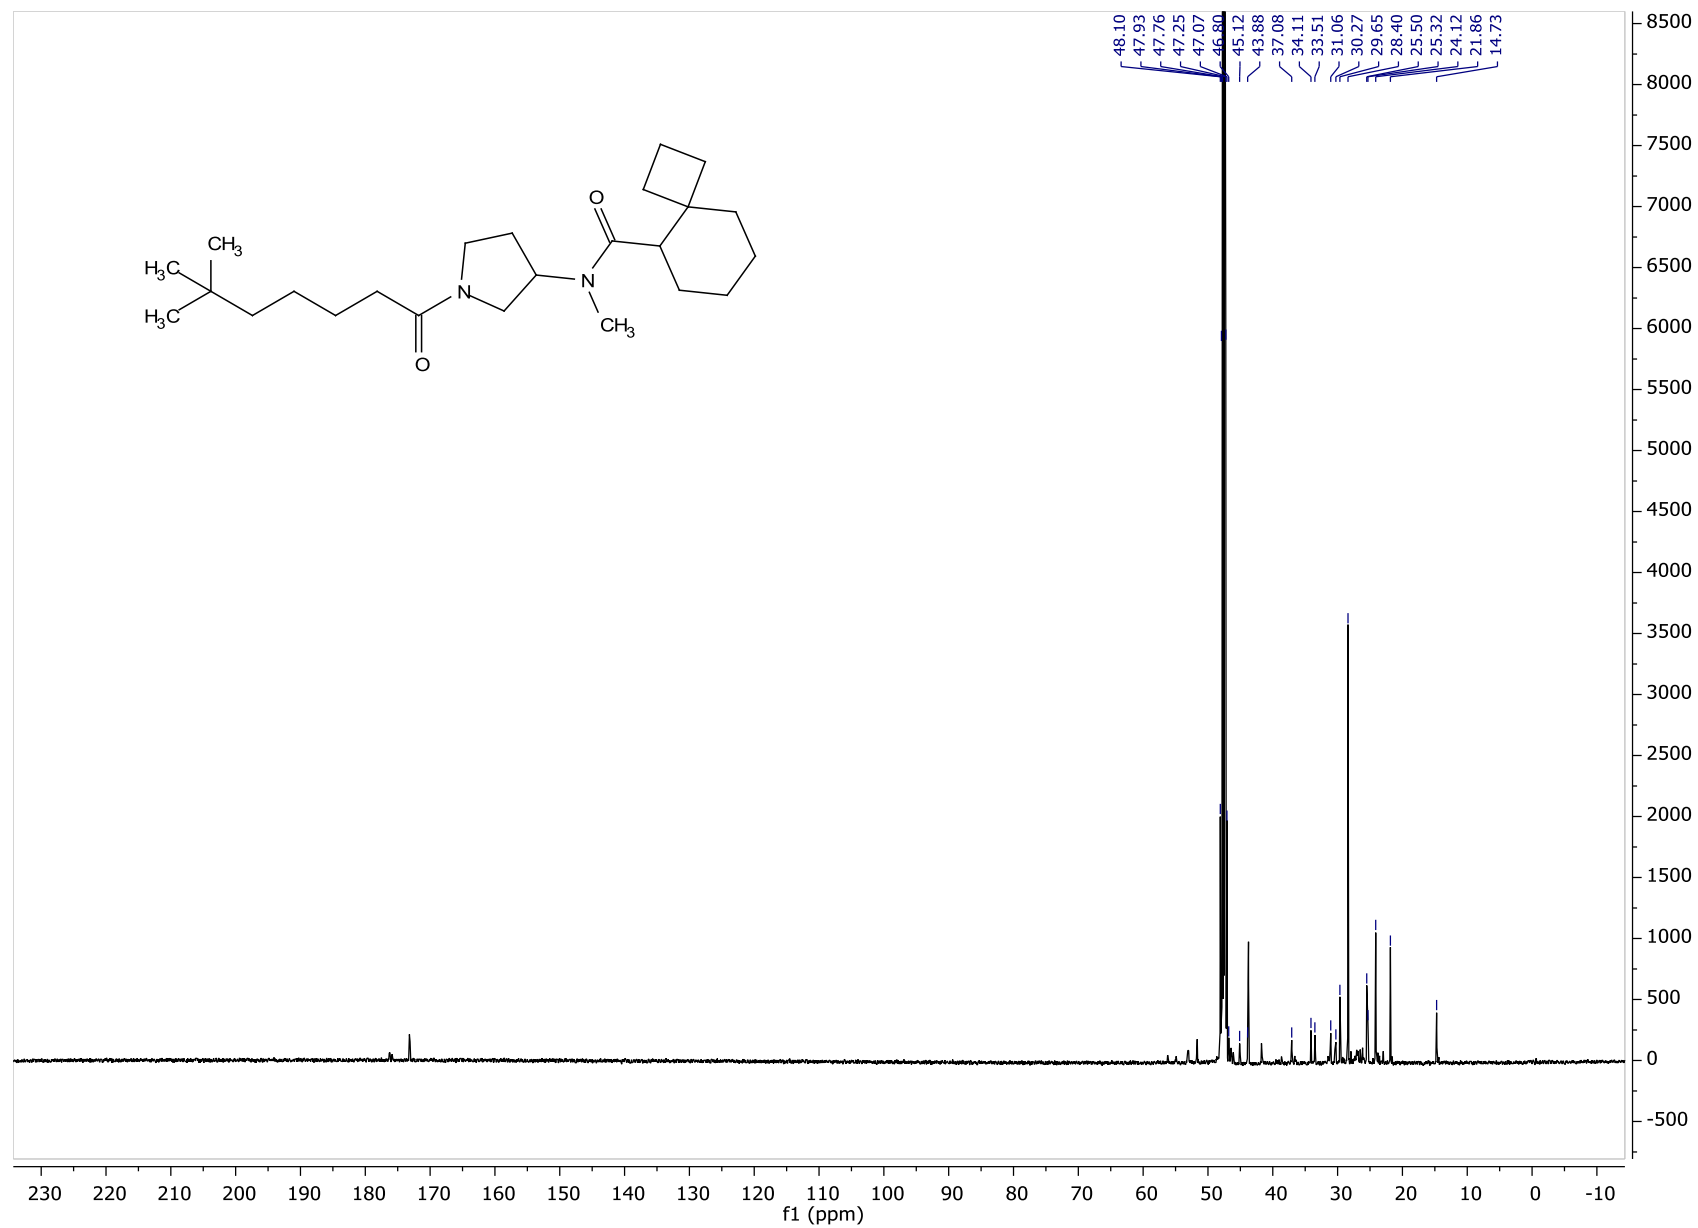

LC/MS spectrum of Z4886818632

Ret\_Time: 1.517 min

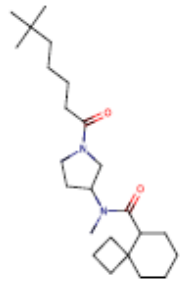

Mol Wt 390.6  
Exact Mass 390.4

| # | Time  | Area%  |
|---|-------|--------|
| 1 | 1.517 | 100.00 |

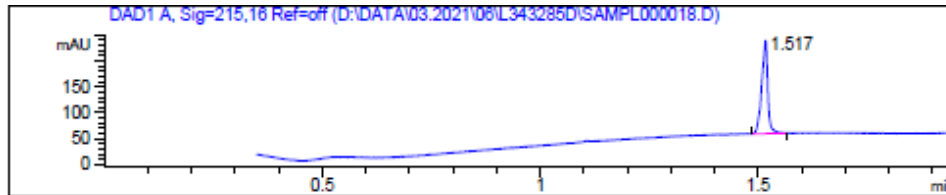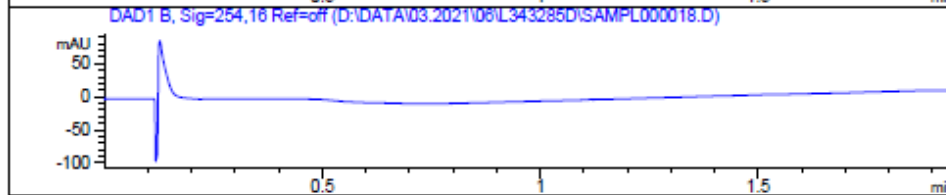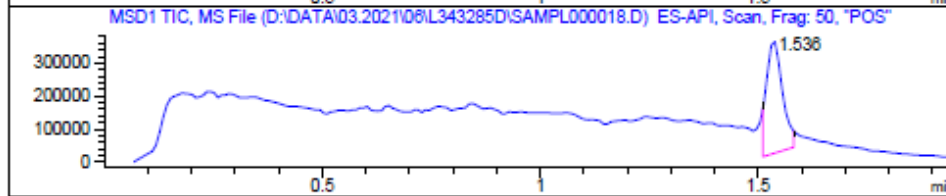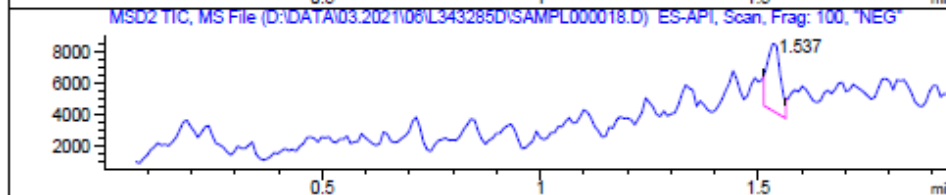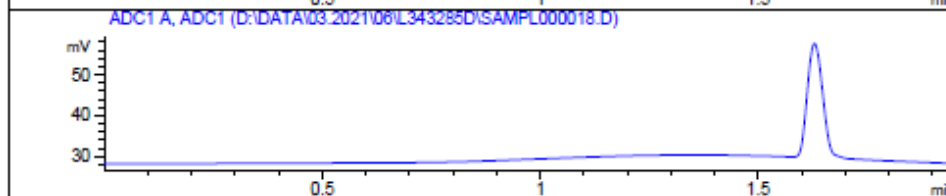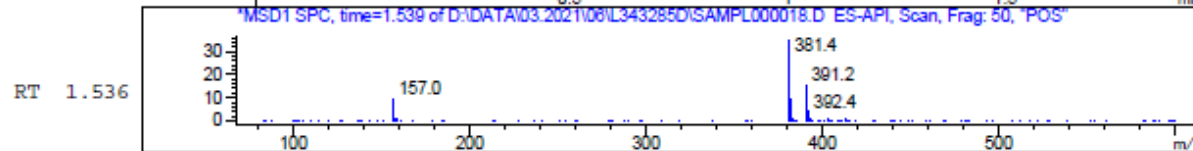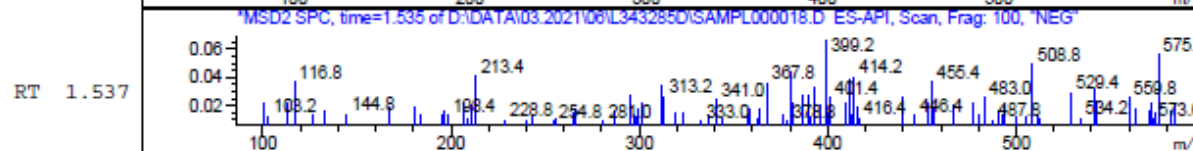

<sup>1</sup>H NMR spectrum of Z4886818633

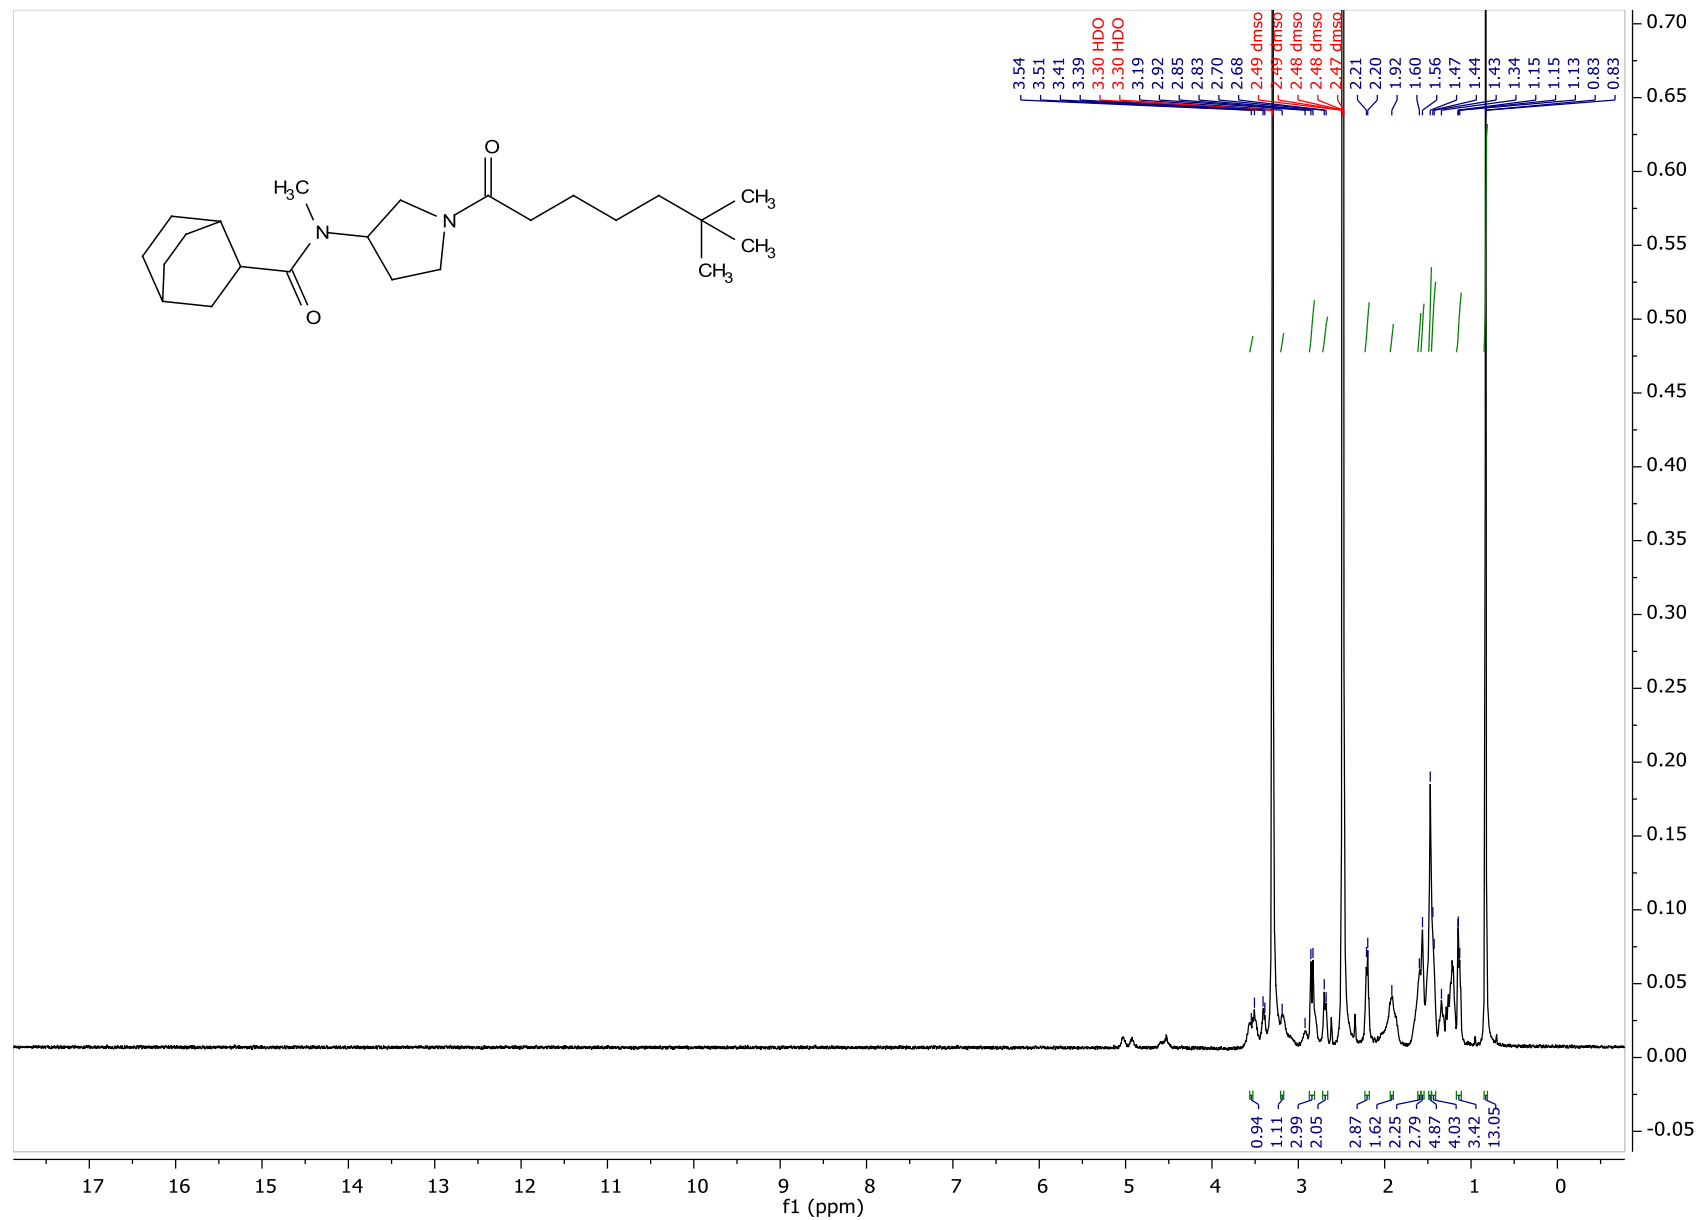



LC/MS spectrum of Z4886818633

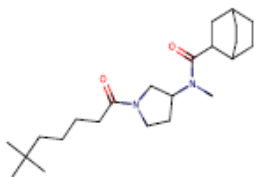

Mol Wt 376.58

Exact Mass 376.38

| # | Time  | Area% |
|---|-------|-------|
| 1 | 1.164 | 2.94  |
| 2 | 1.551 | 97.06 |

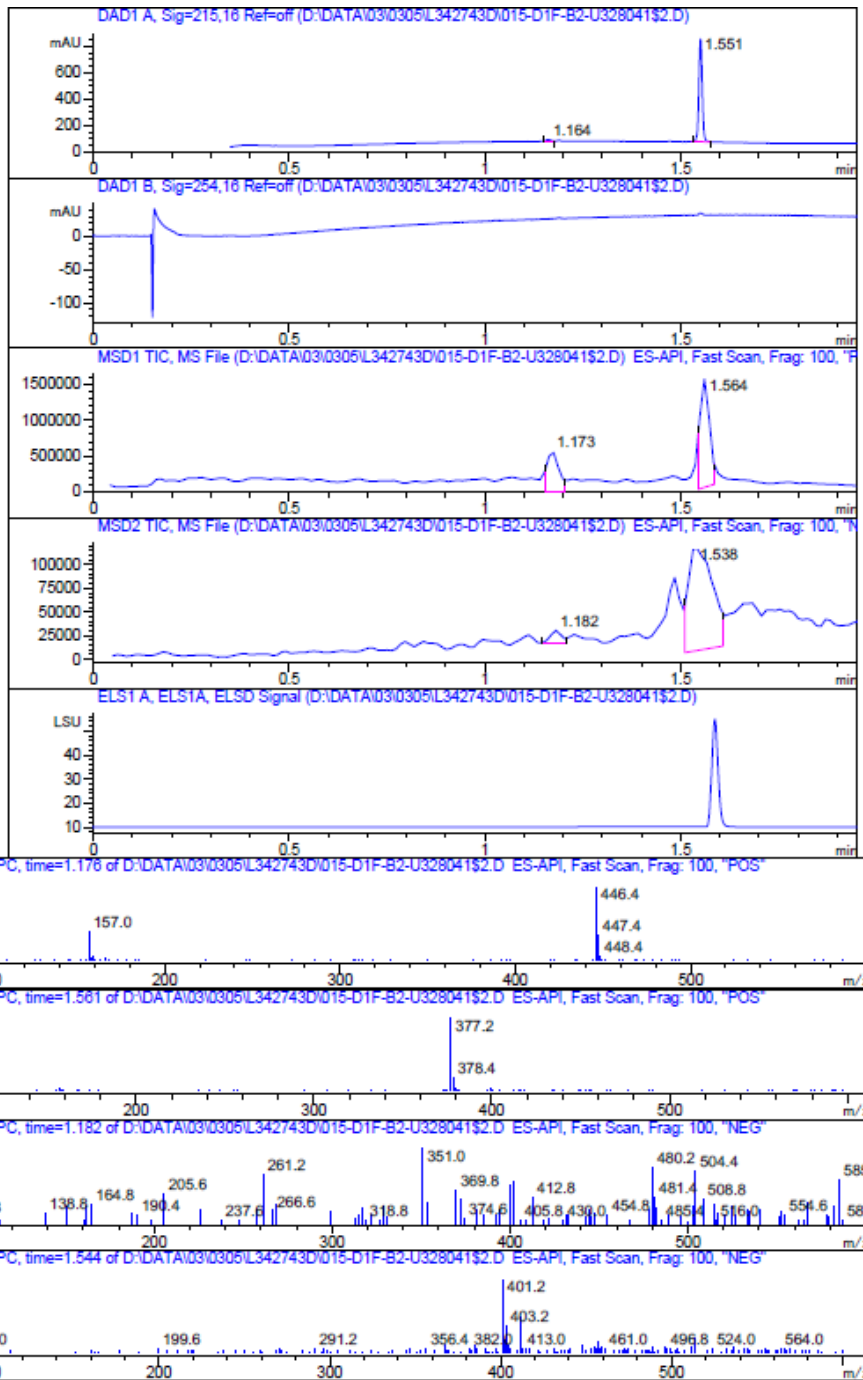

<sup>1</sup>H NMR spectrum of Z4886818635

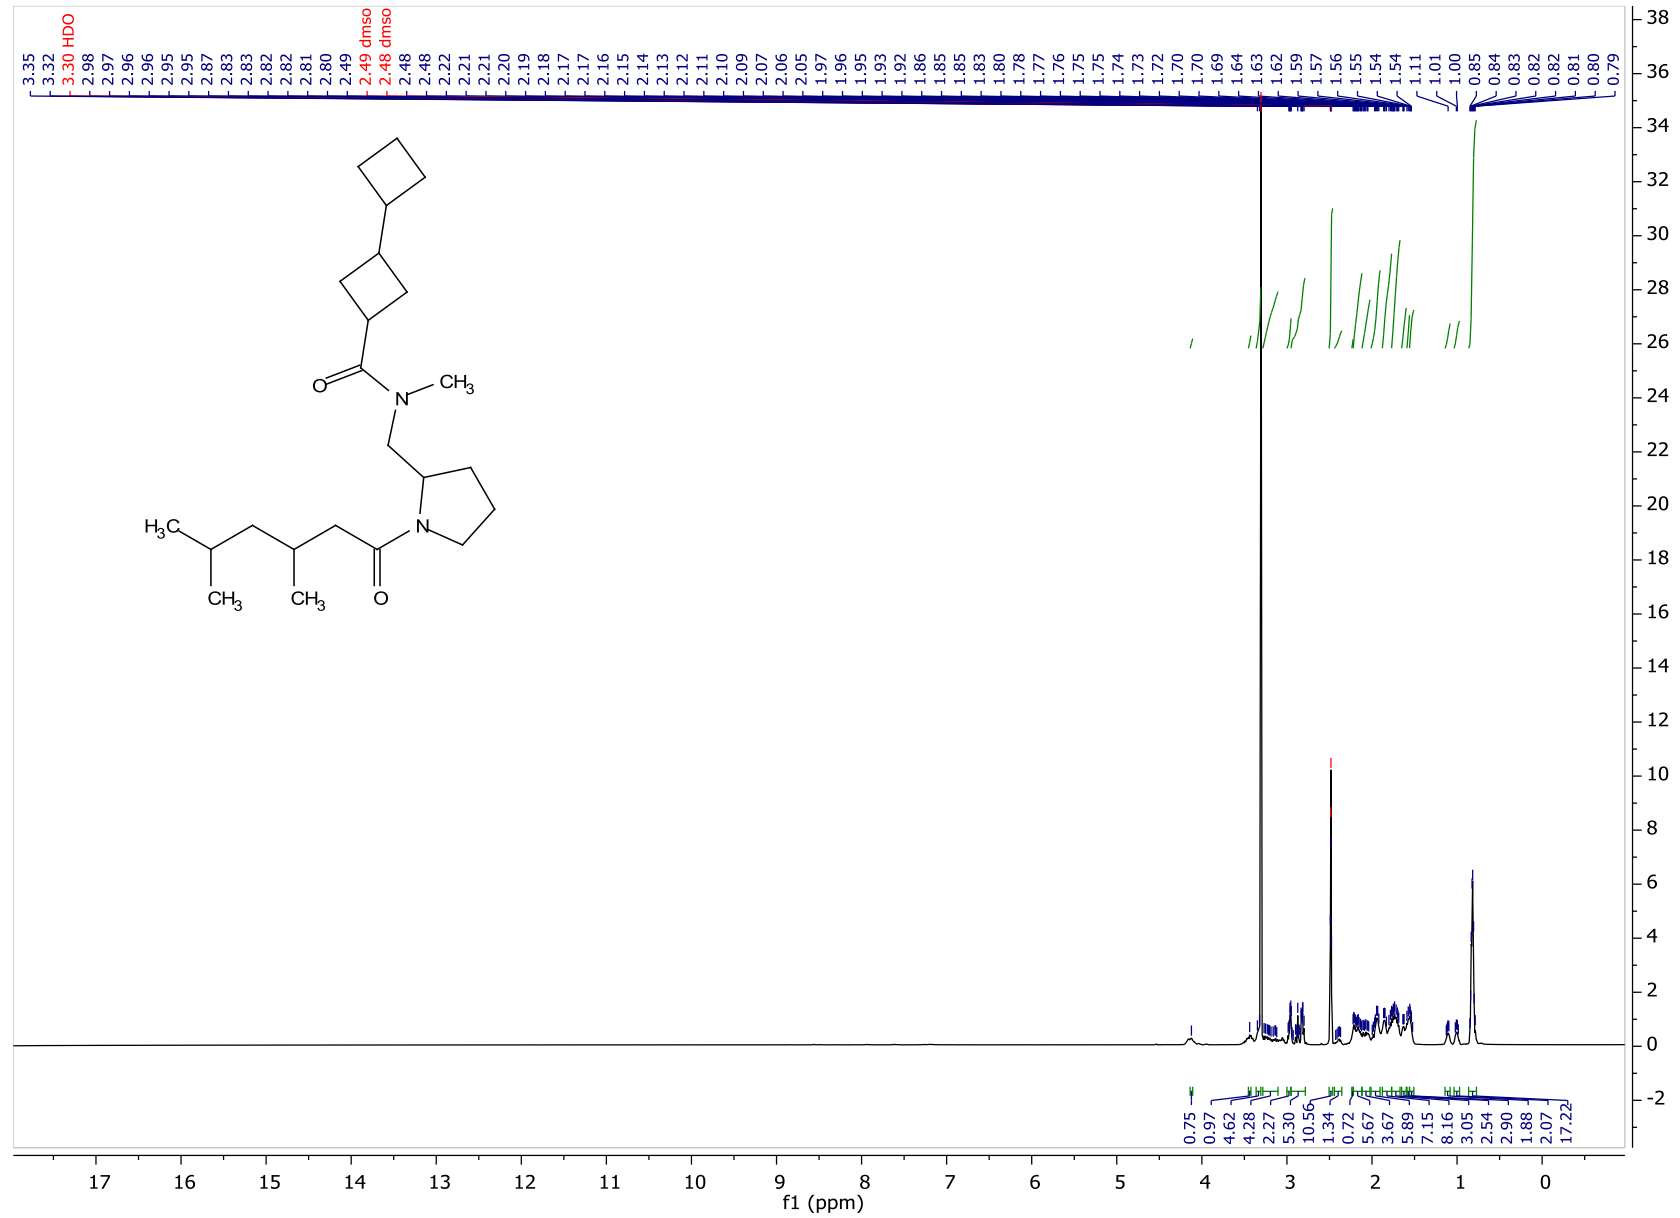

<sup>13</sup>C NMR spectrum of Z4886818635

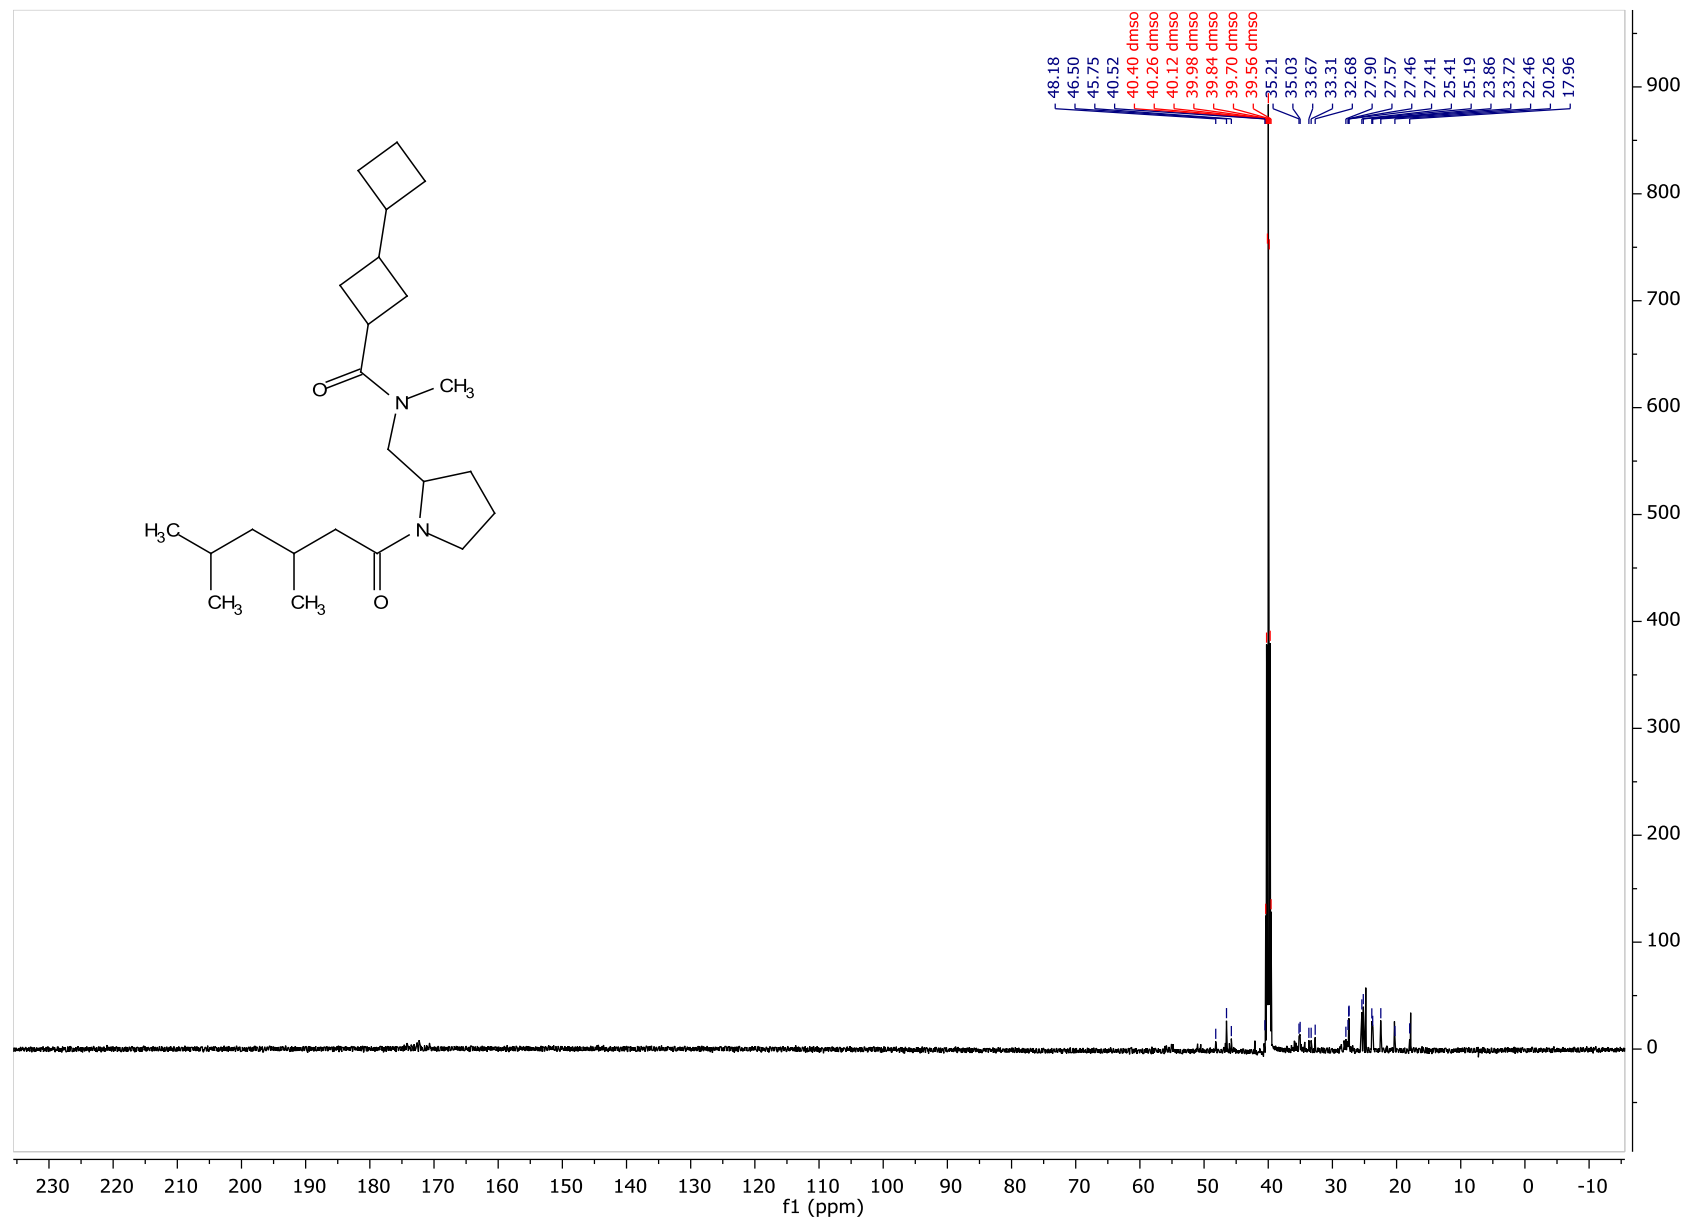

LC/MS spectrum of Z4886818635

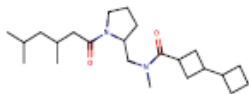

Mol Wt 376.58  
 Exact Mass 376.38

| # | Time  | Area% |
|---|-------|-------|
| 1 | 1.390 | 8.34  |
| 2 | 1.691 | 91.66 |

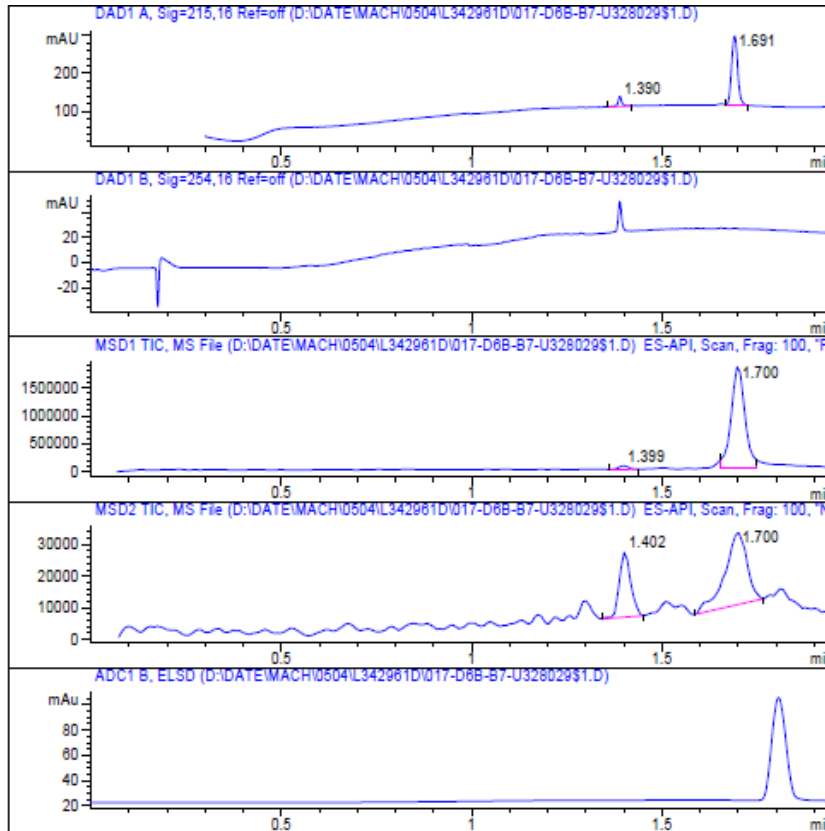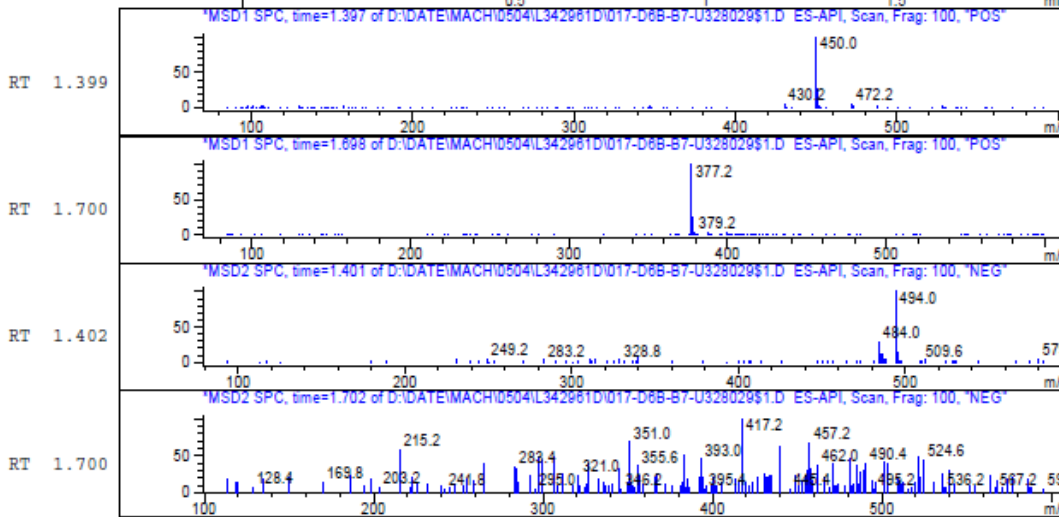

<sup>1</sup>H NMR spectrum of Z4886818643

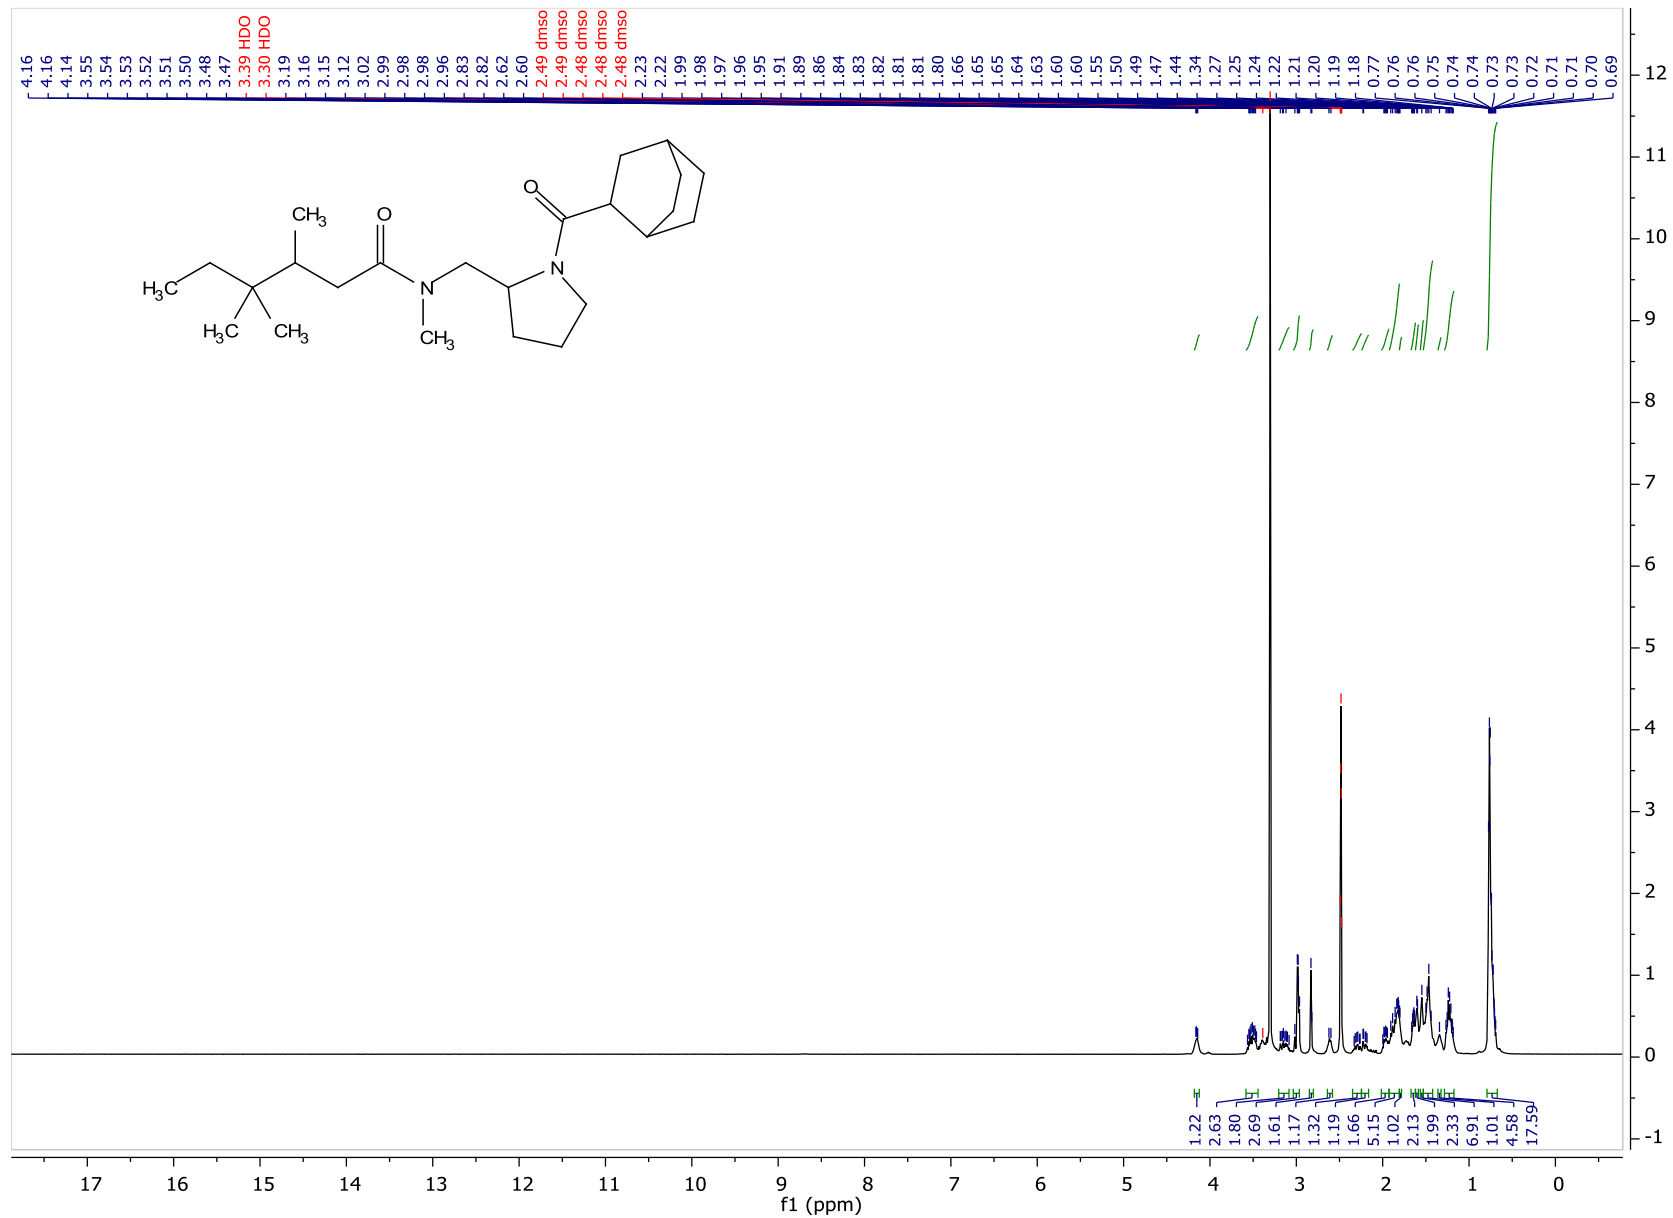

<sup>13</sup>C NMR spectrum of Z4886818643

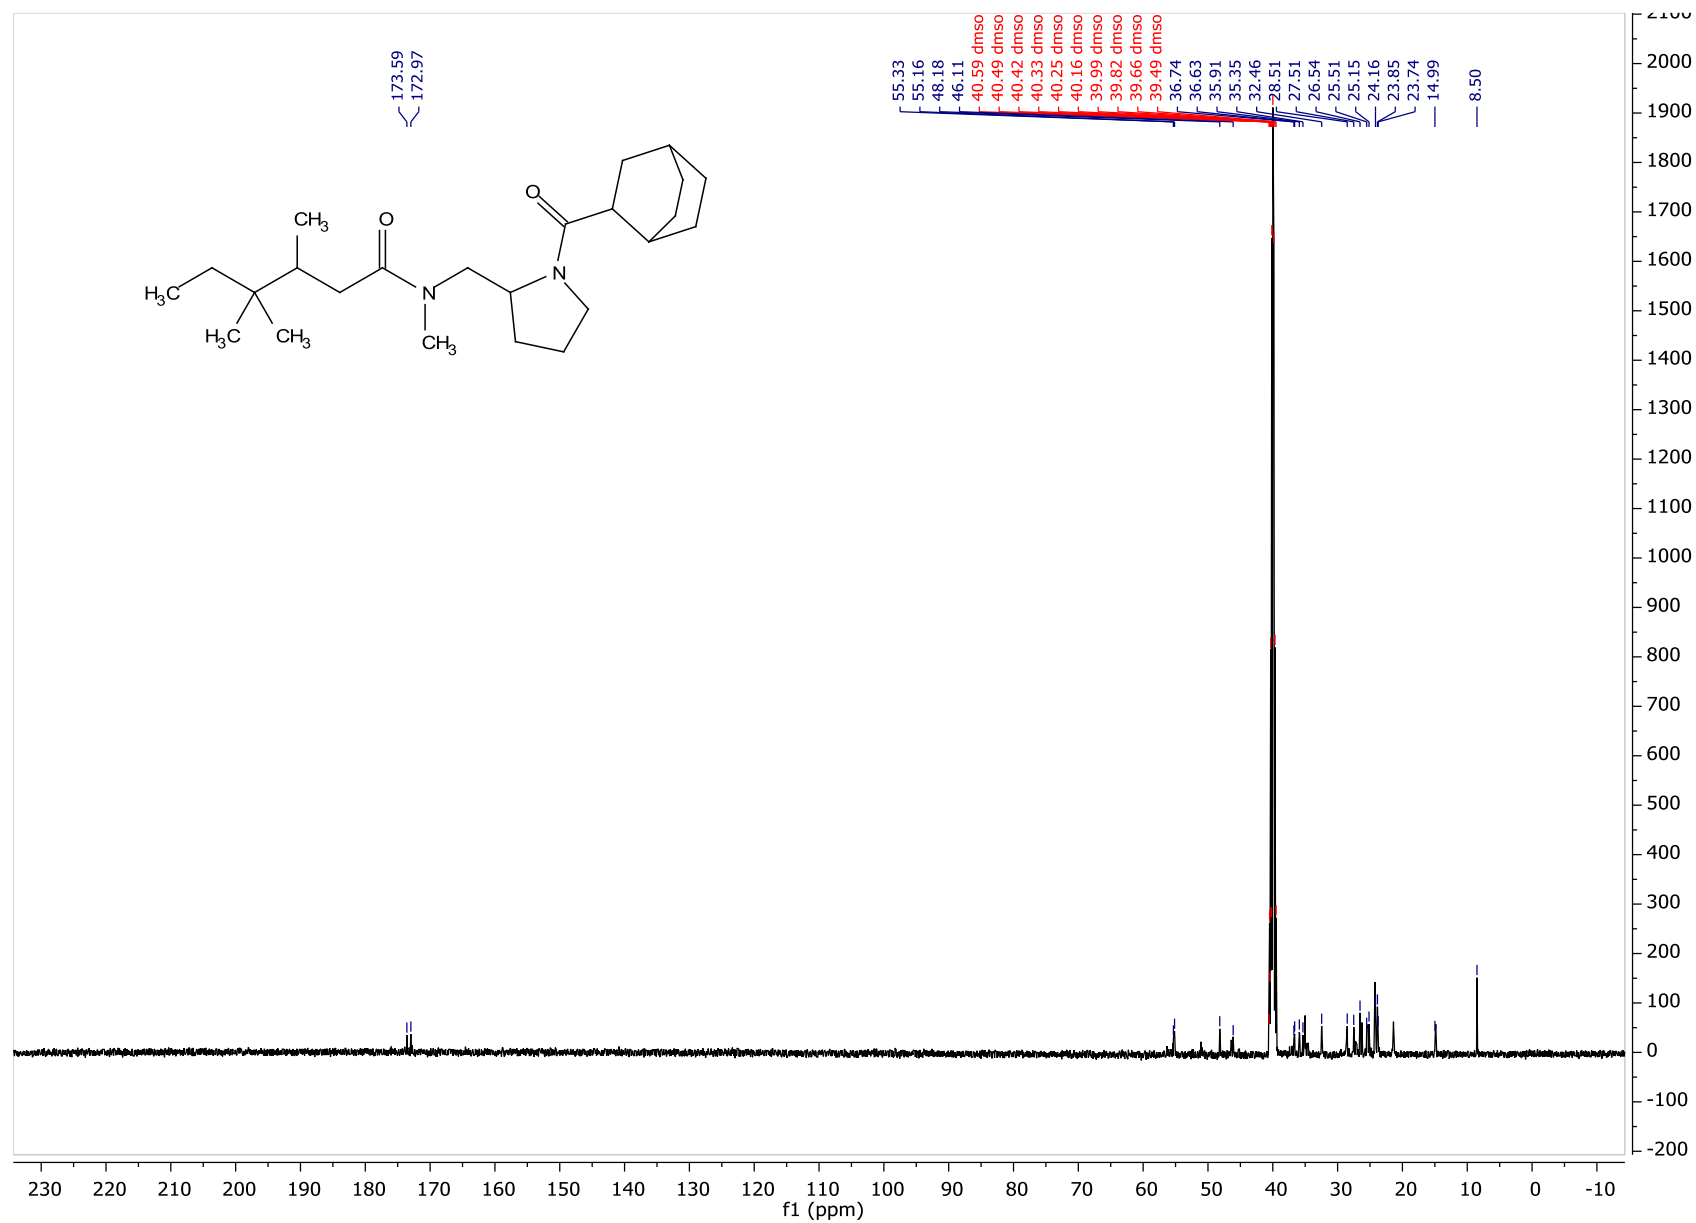

LC/MS spectrum of Z4886818643

Ret\_Time: 1.413 min

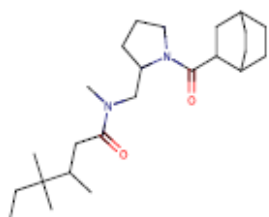

Mol Wt 390.6  
Exact Mass 390.4

| # | Time  | Area%  |
|---|-------|--------|
| 1 | 1.413 | 100.00 |

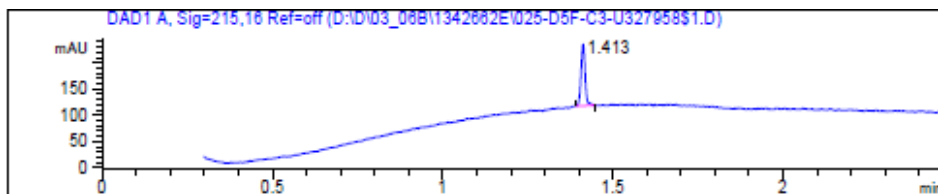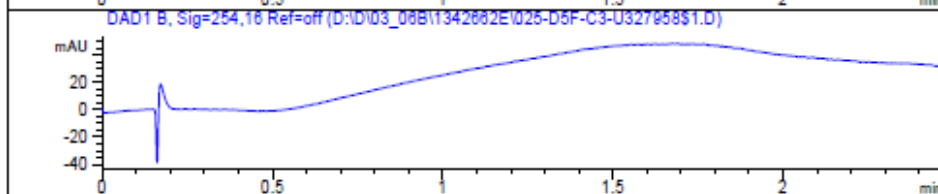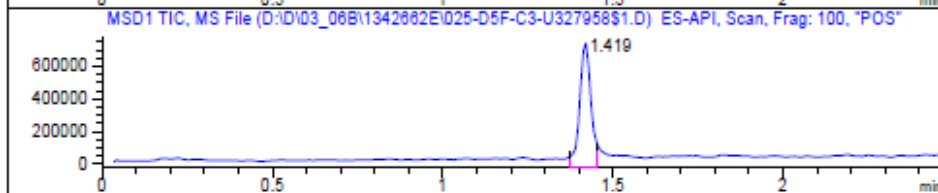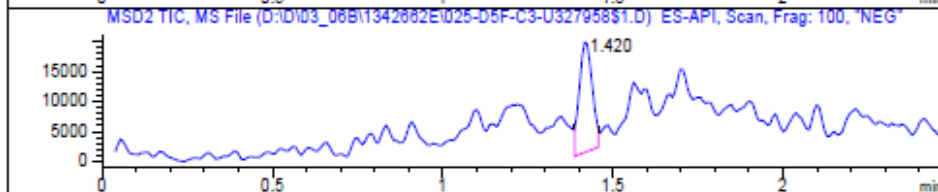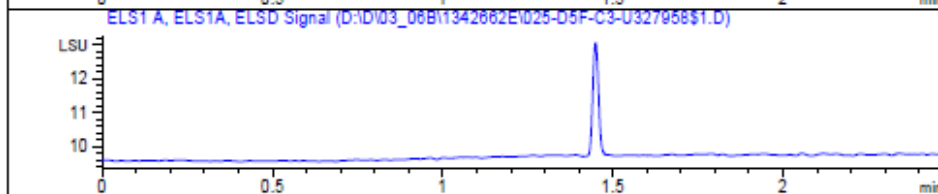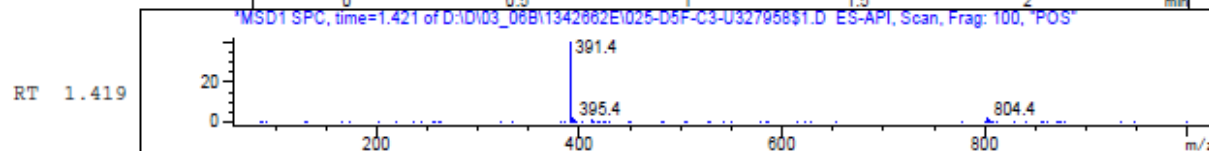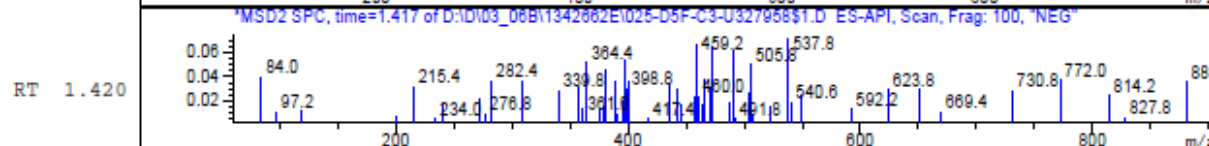

LC/MS spectrum of Z4886818652

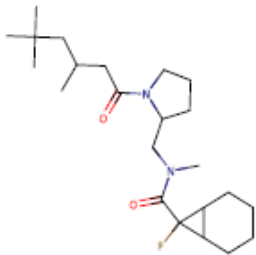

Mol Wt 394.57  
Exact Mass 394.37

| # | Time  | Area% |
|---|-------|-------|
| 1 | 0.795 | 3.49  |
| 2 | 1.510 | 96.51 |

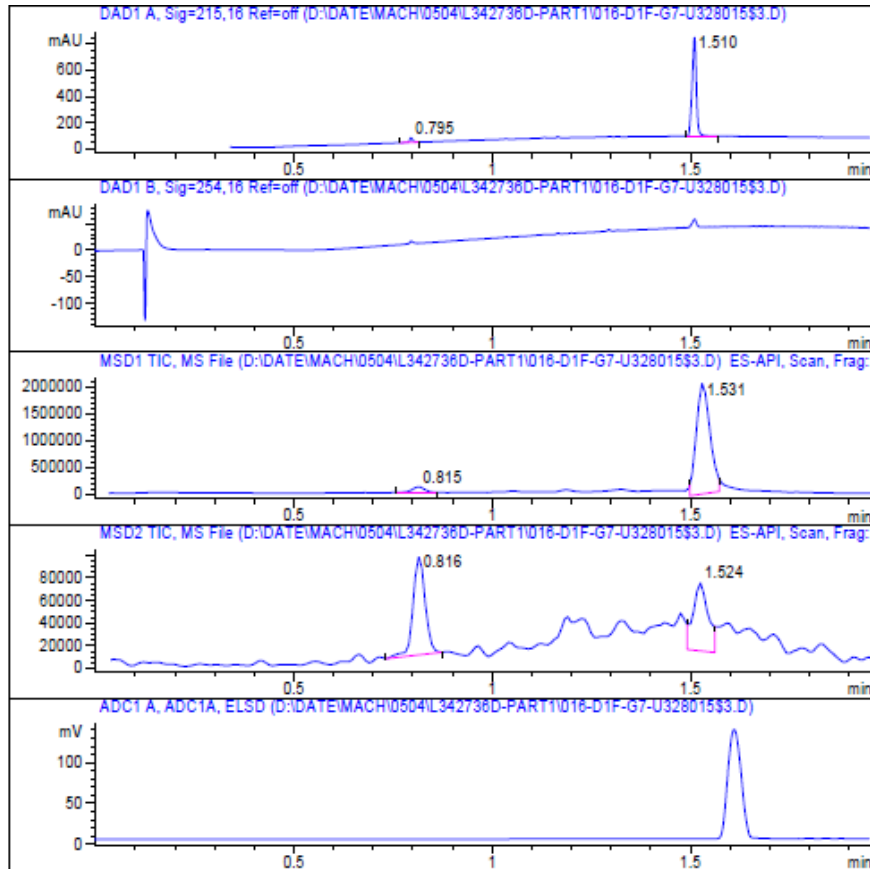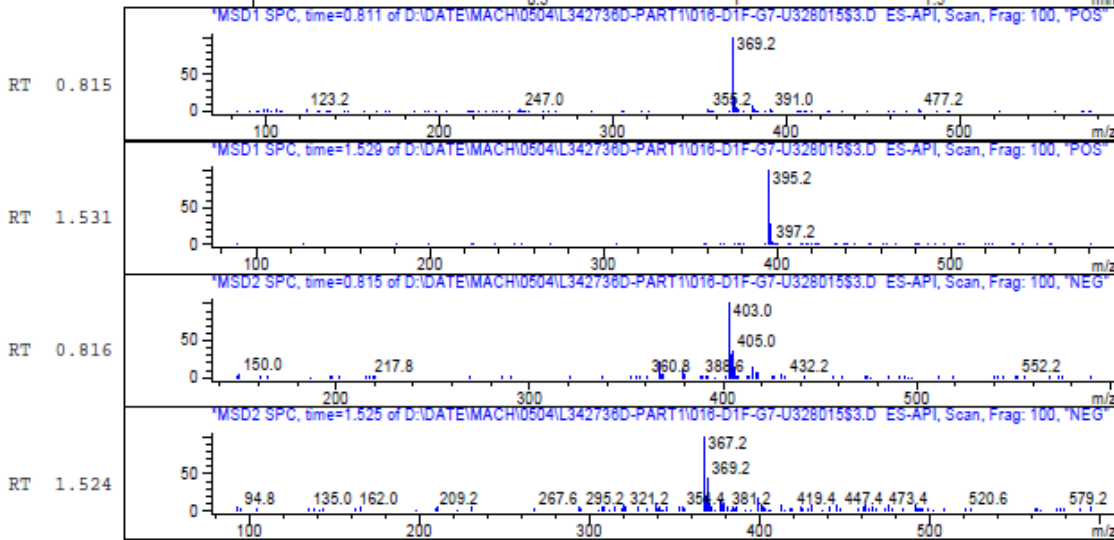



<sup>1</sup>H NMR spectrum of Z4886818658

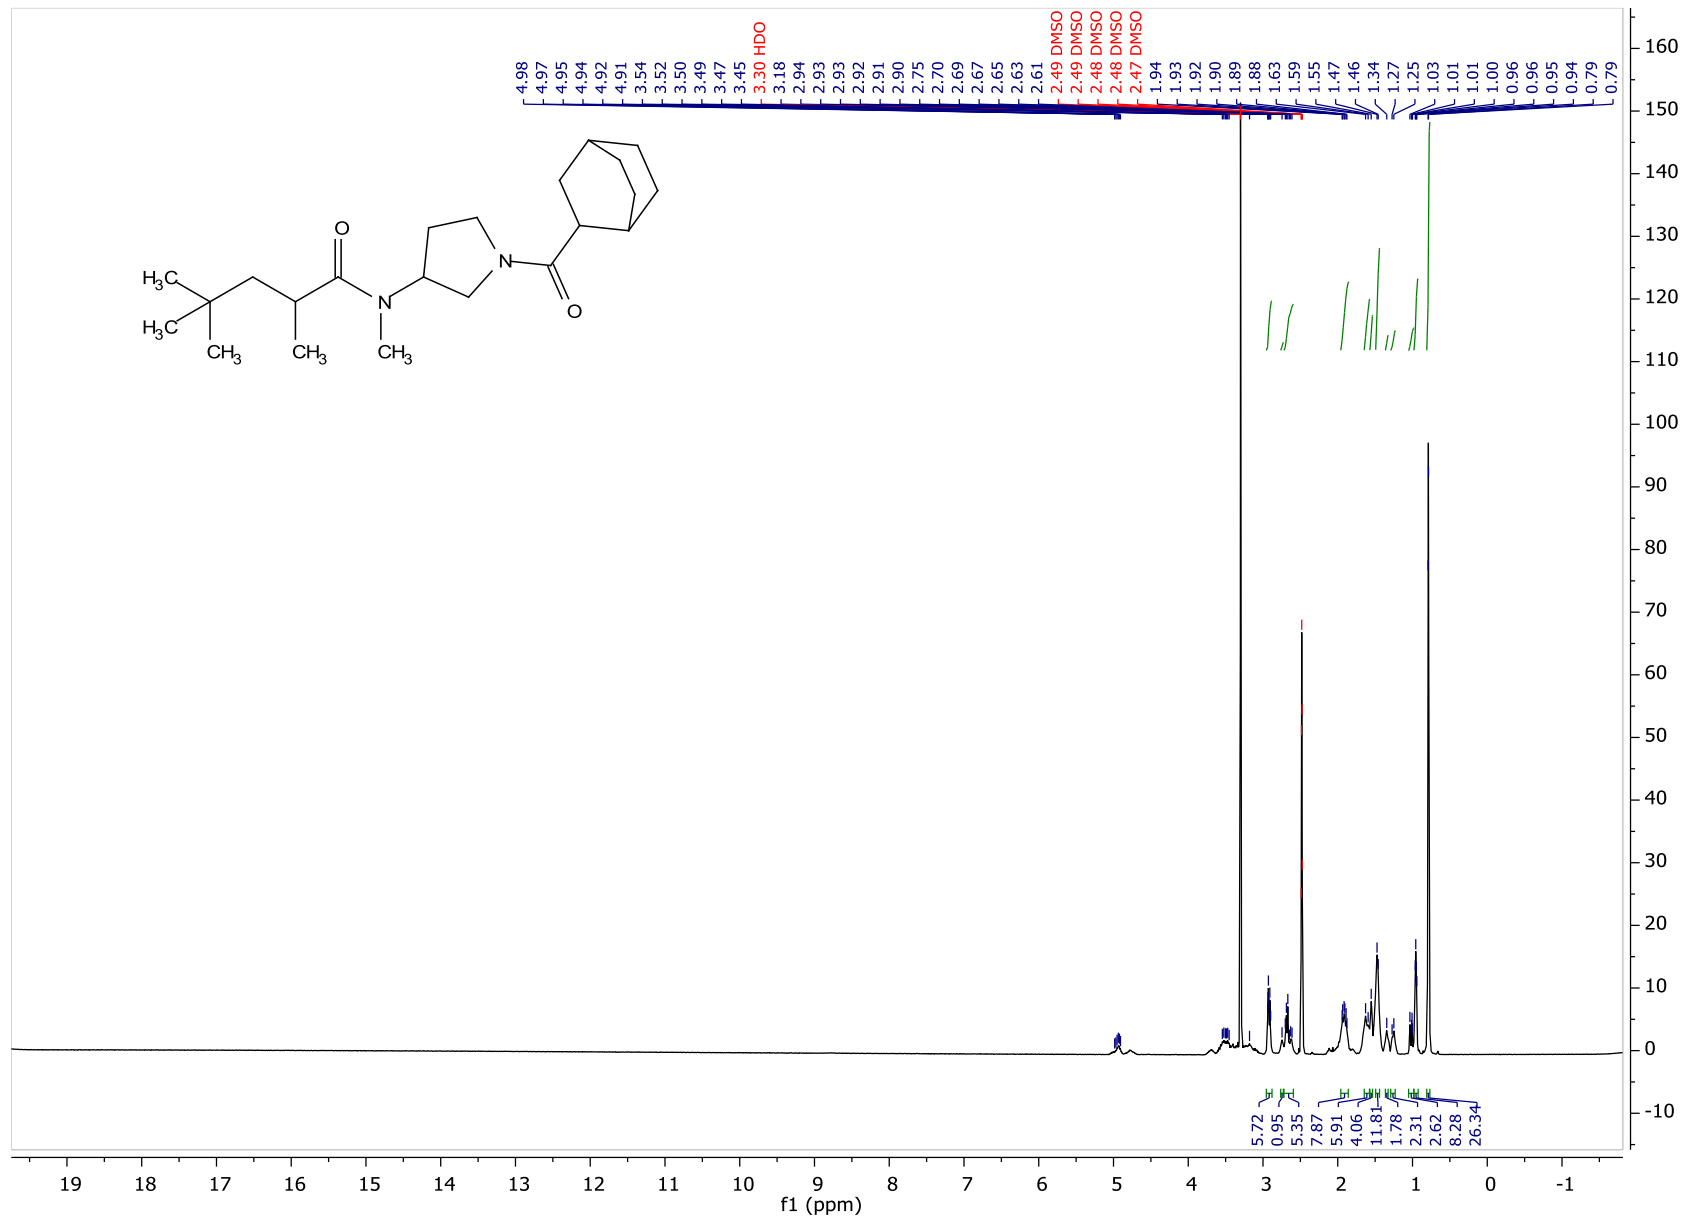

<sup>13</sup>C NMR spectrum of Z4886818658

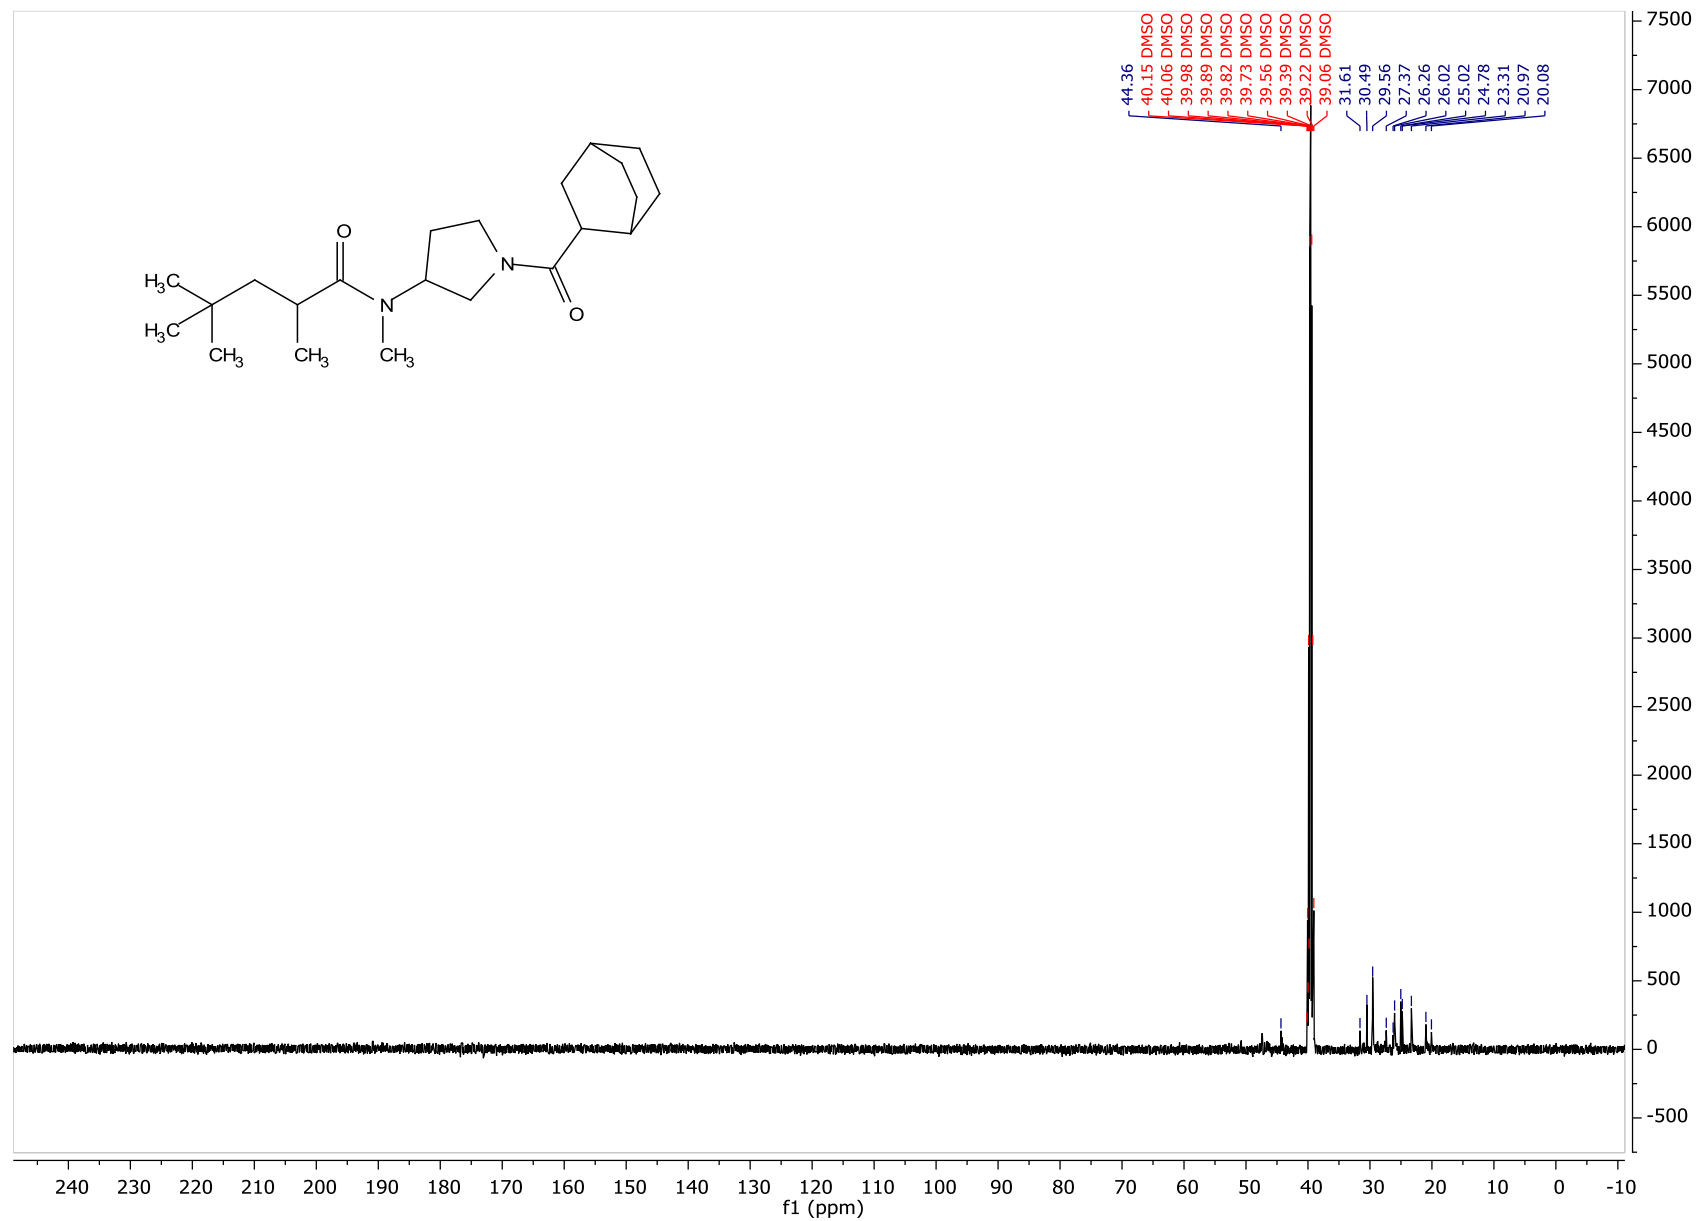

LC/MS spectrum of Z4886818658

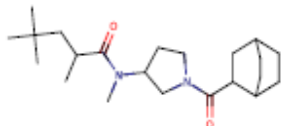

Mol Wt 362.55  
 Exact Mass 362.36

| # | Time  | Area% |
|---|-------|-------|
| 1 | 1.160 | 5.51  |
| 2 | 1.561 | 94.49 |

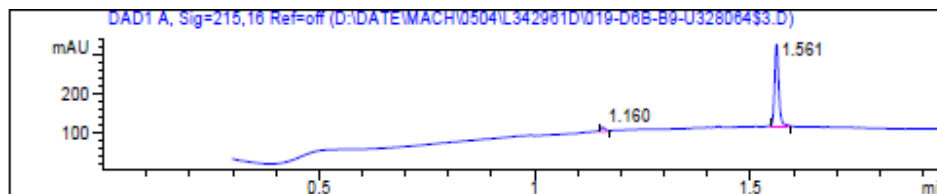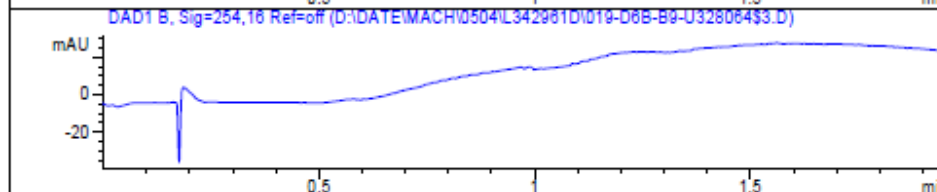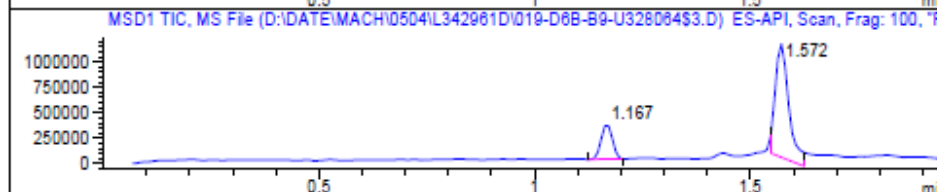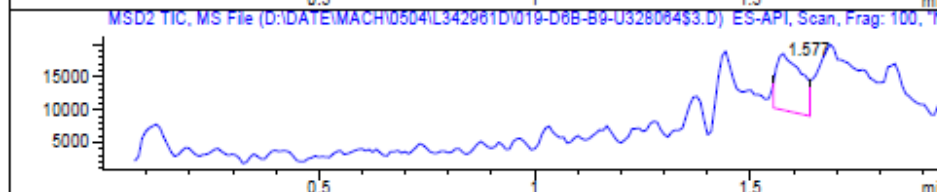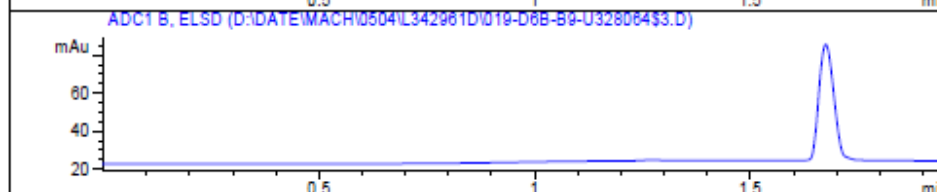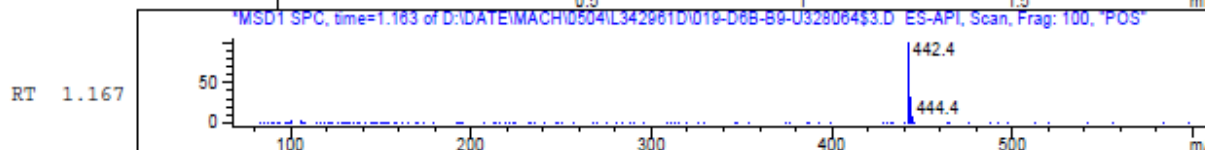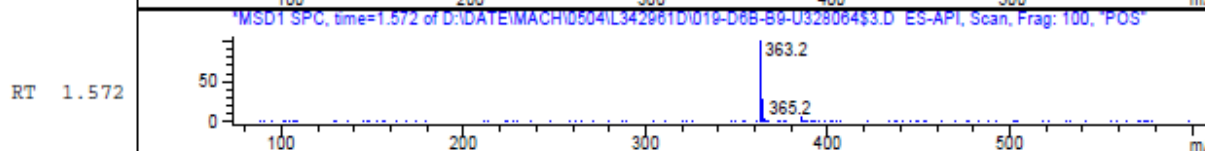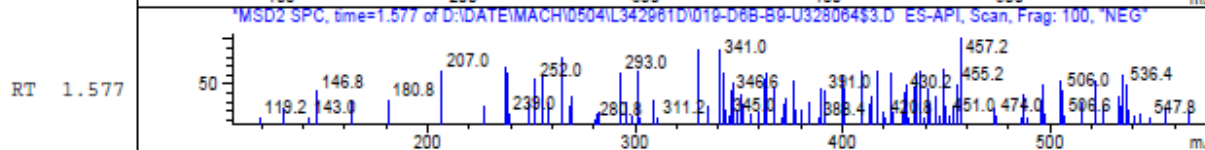

<sup>1</sup>H NMR spectrum of Z4886818665

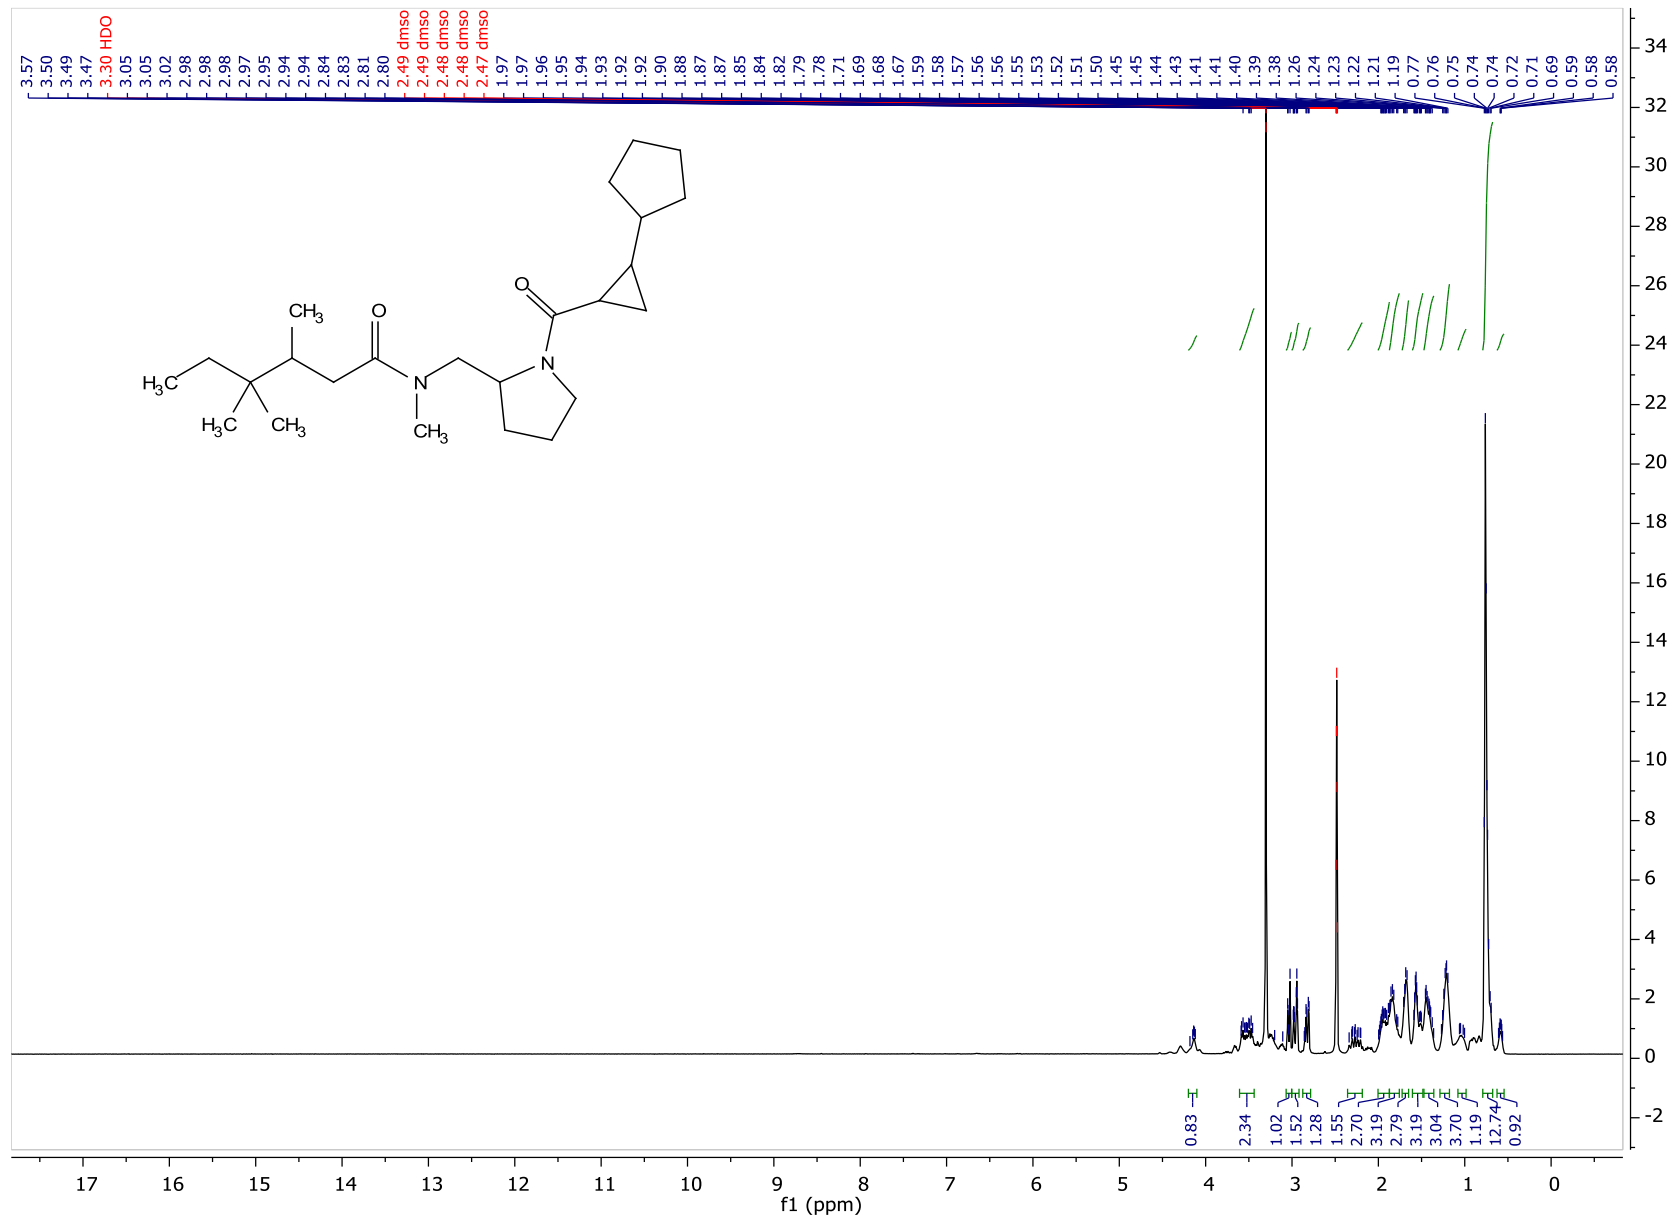

<sup>13</sup>C NMR spectrum of Z4886818665

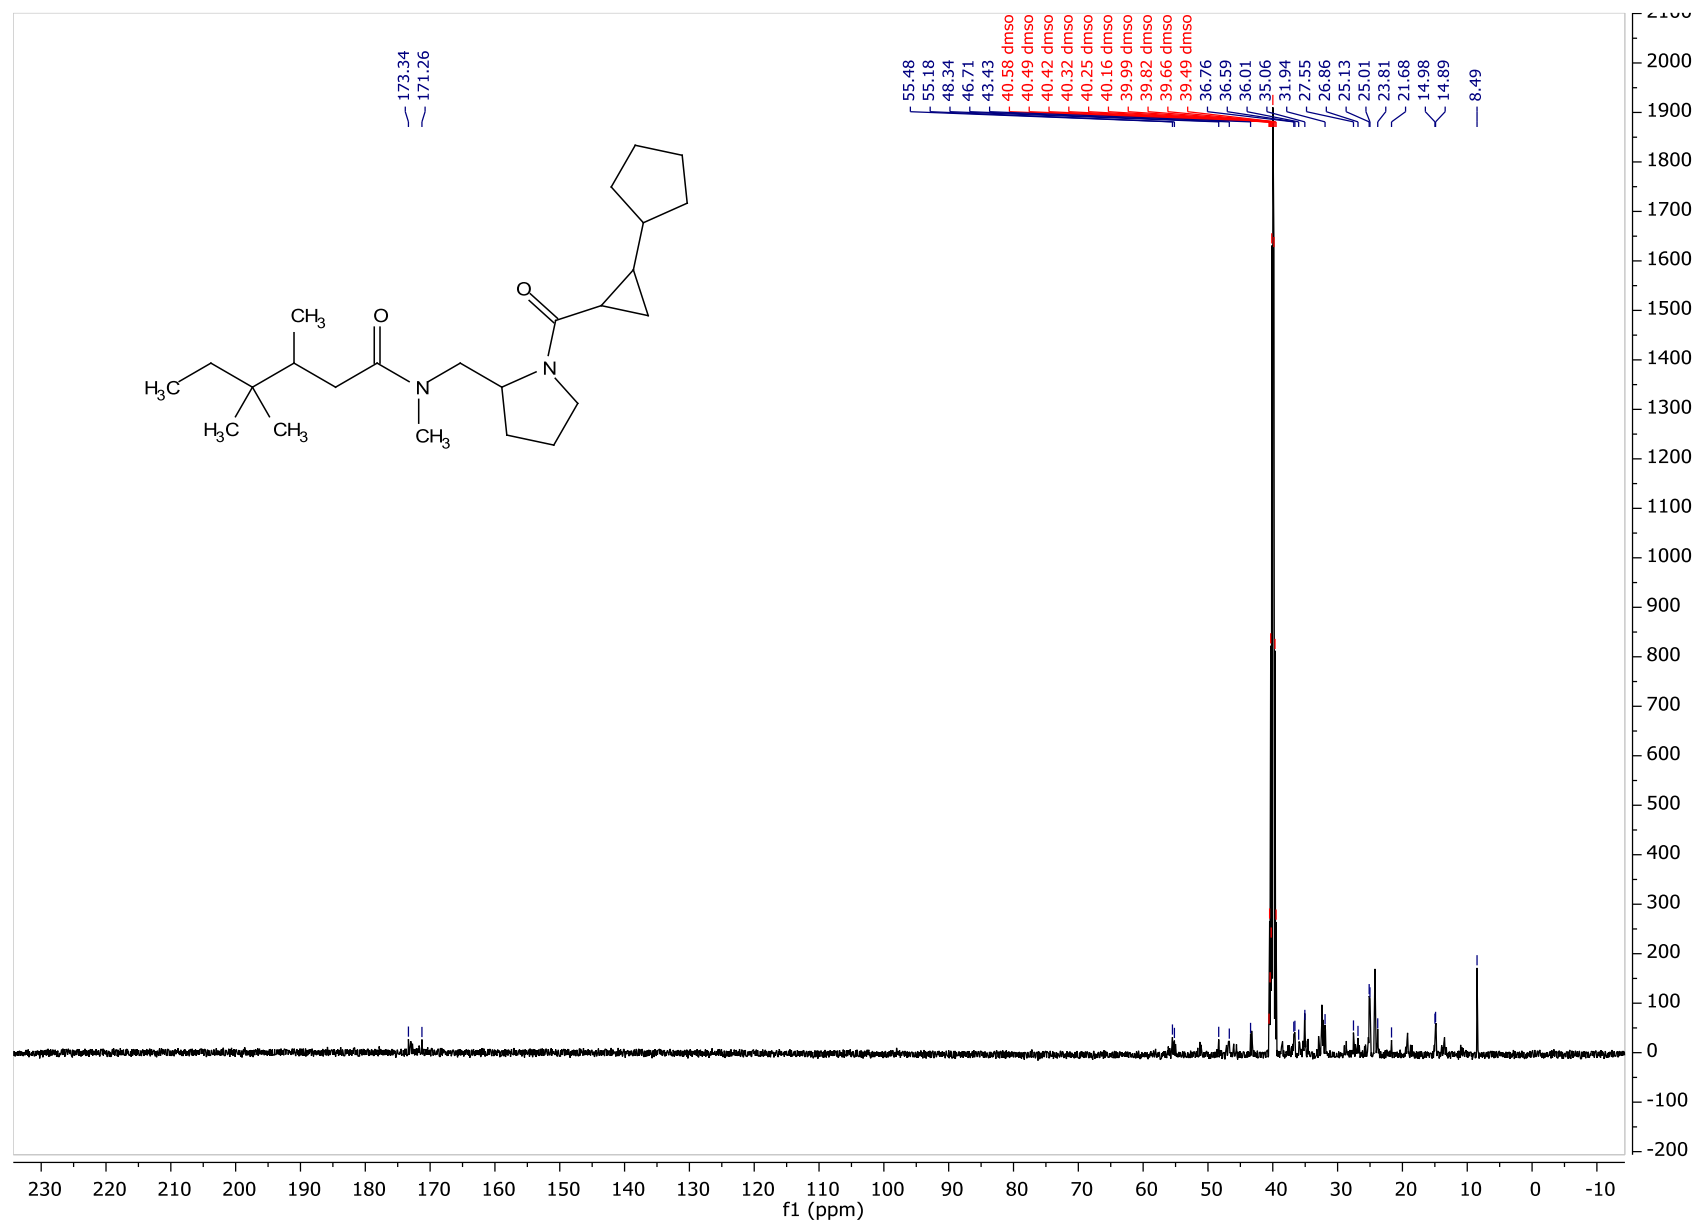

LC/MS spectrum of Z4886818665

Ret\_Time: 1.677 min

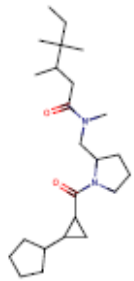

Mol Wt 390.6  
Exact Mass 390.4

| # | Time  | Area%  |
|---|-------|--------|
| 1 | 1.677 | 100.00 |

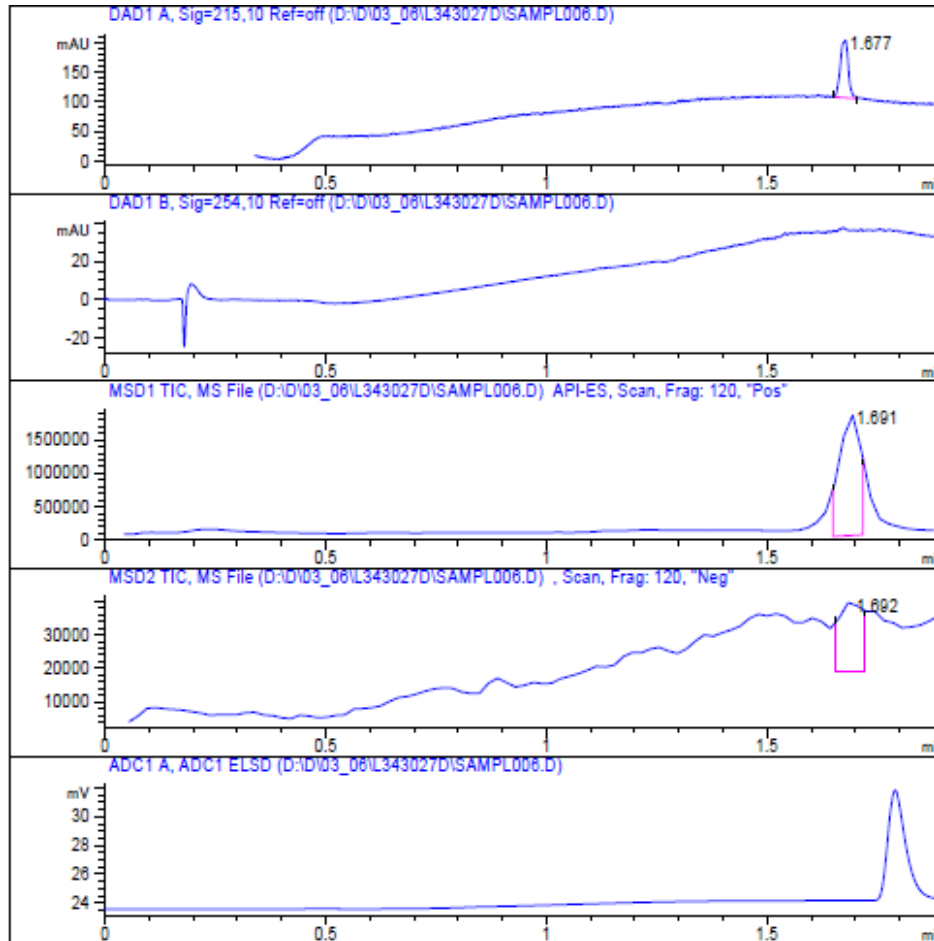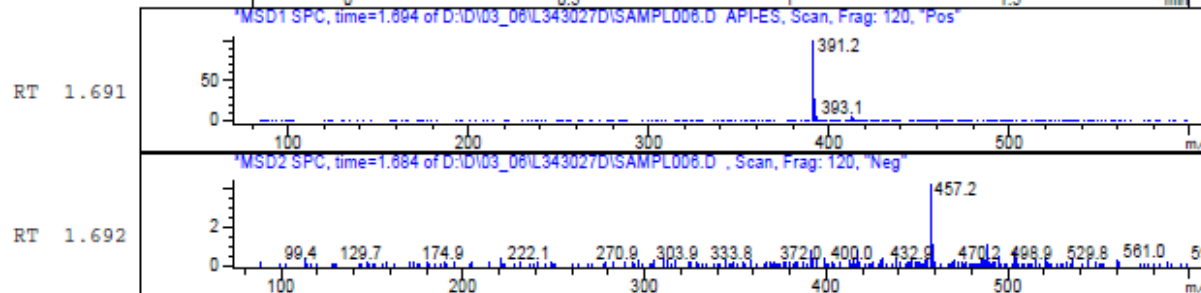

<sup>1</sup>H NMR spectrum of Z4886825499

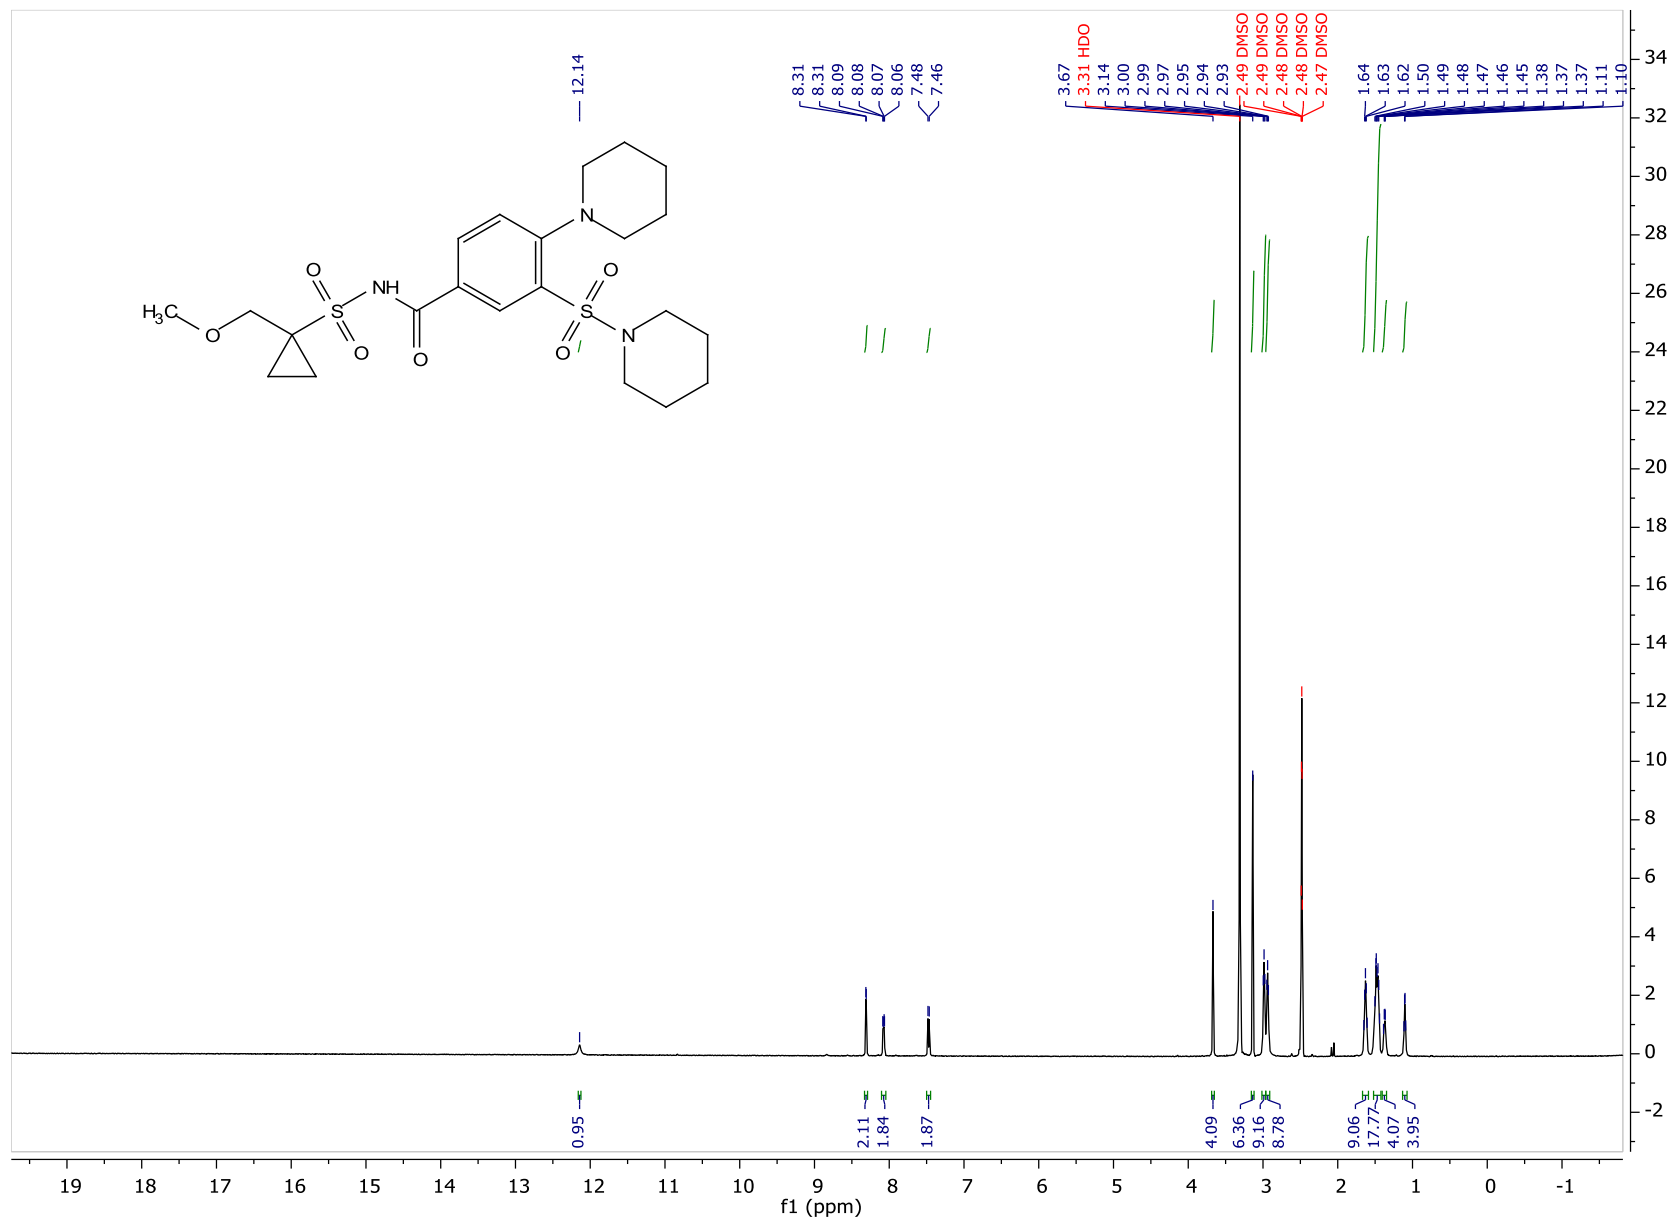

<sup>13</sup>C NMR spectrum of Z4886825499

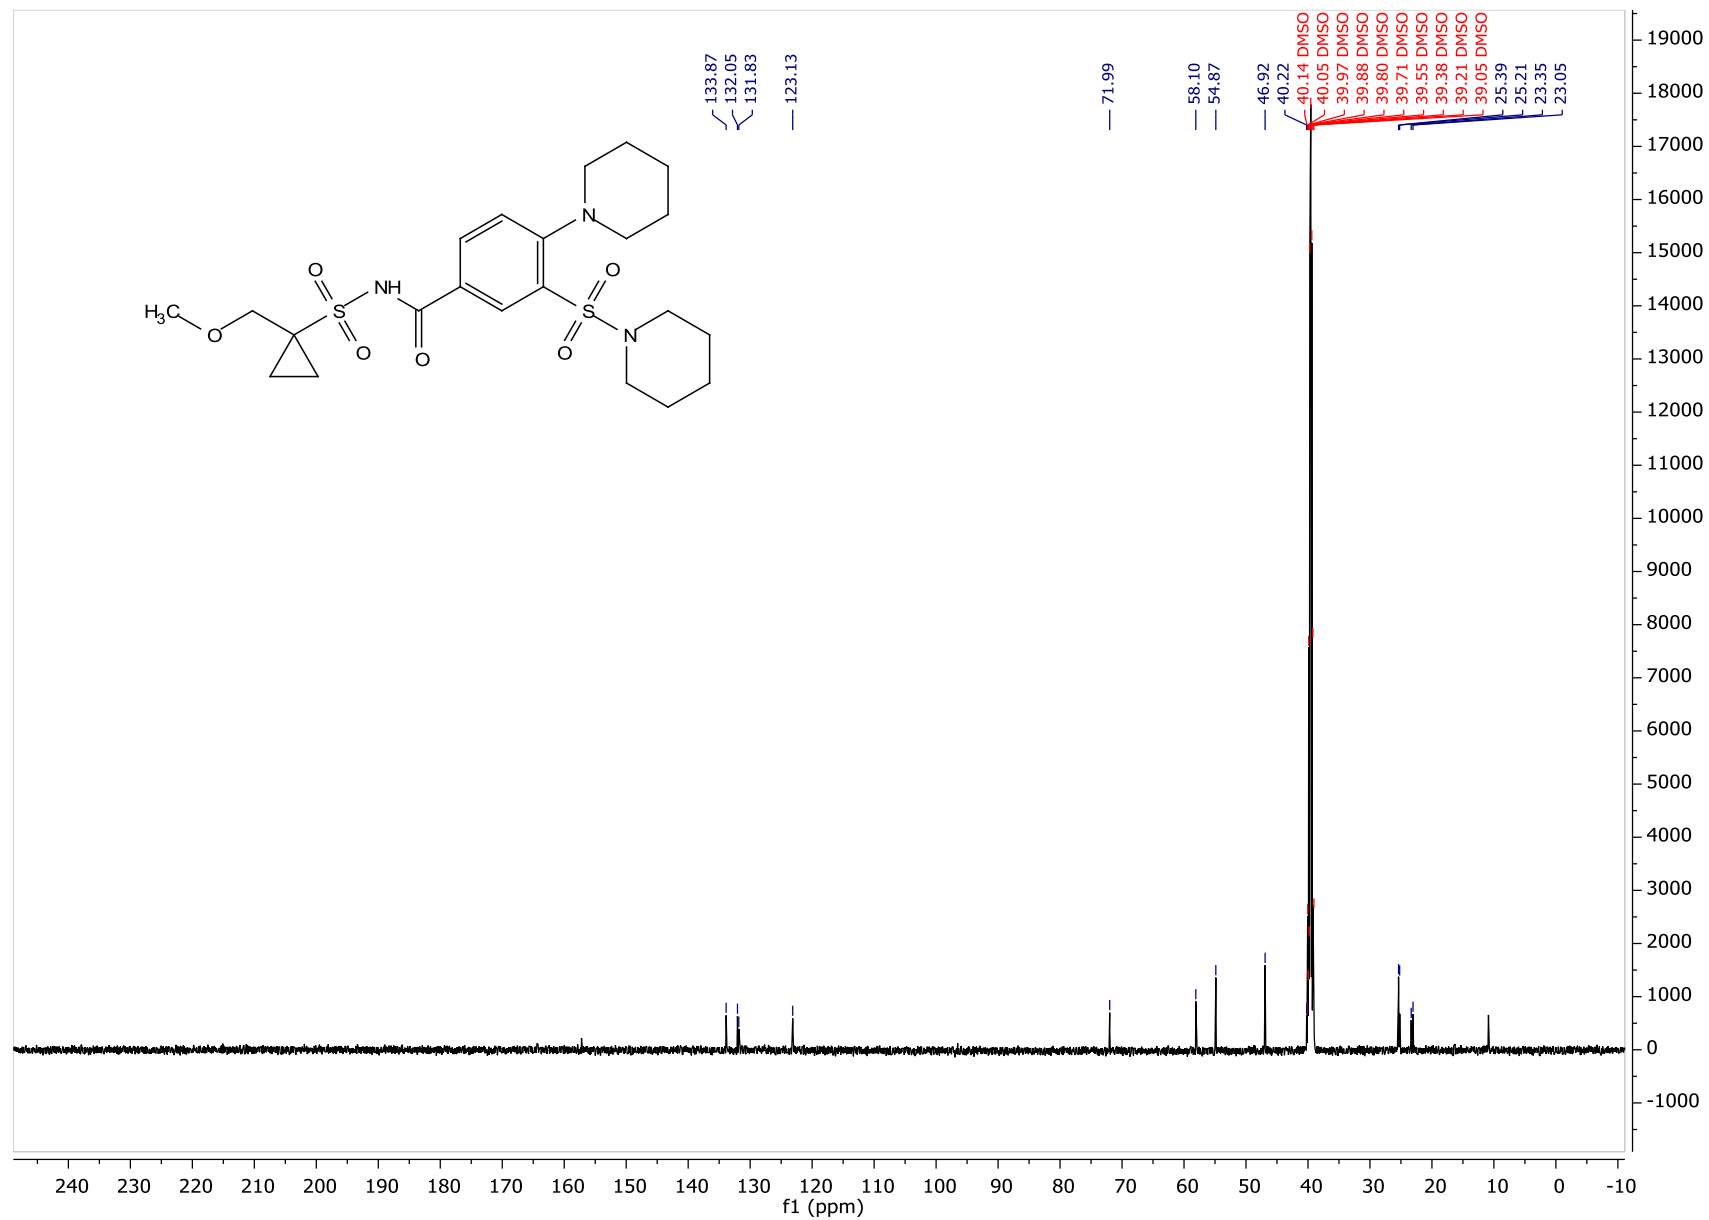



LC/MS spectrum of Z4886825499

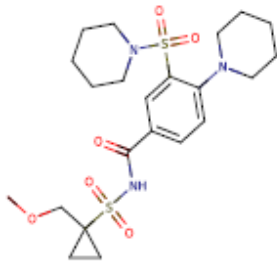

Mol Wt 499.64  
Exact Mass 499.21

| # | Time  | Area%  |
|---|-------|--------|
| 1 | 1.434 | 100.00 |

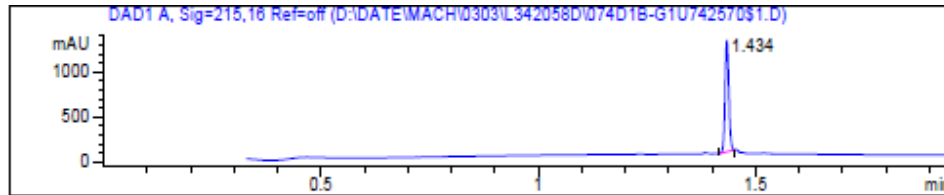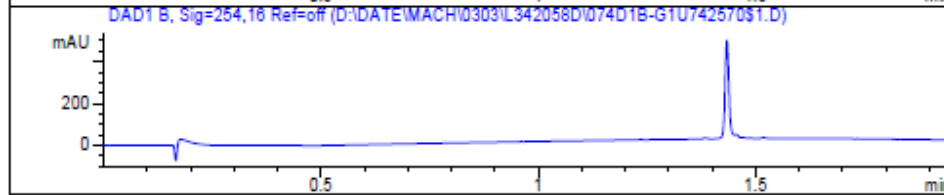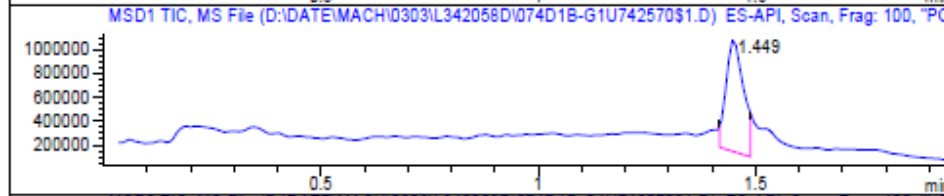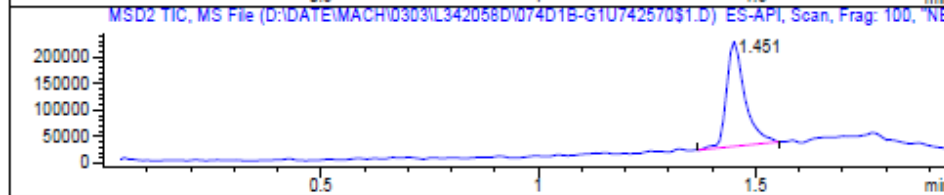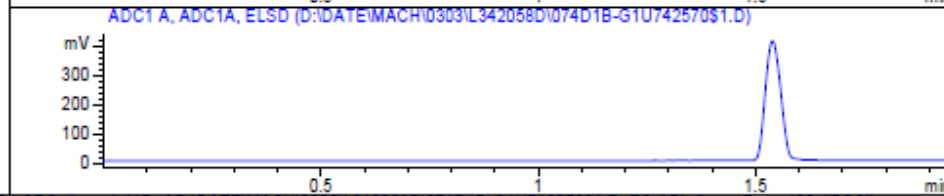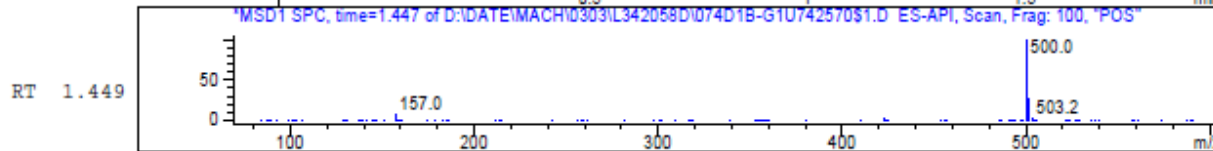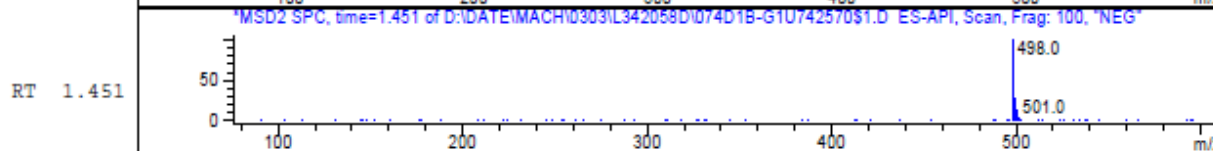

<sup>1</sup>H NMR spectrum of Z4886825504

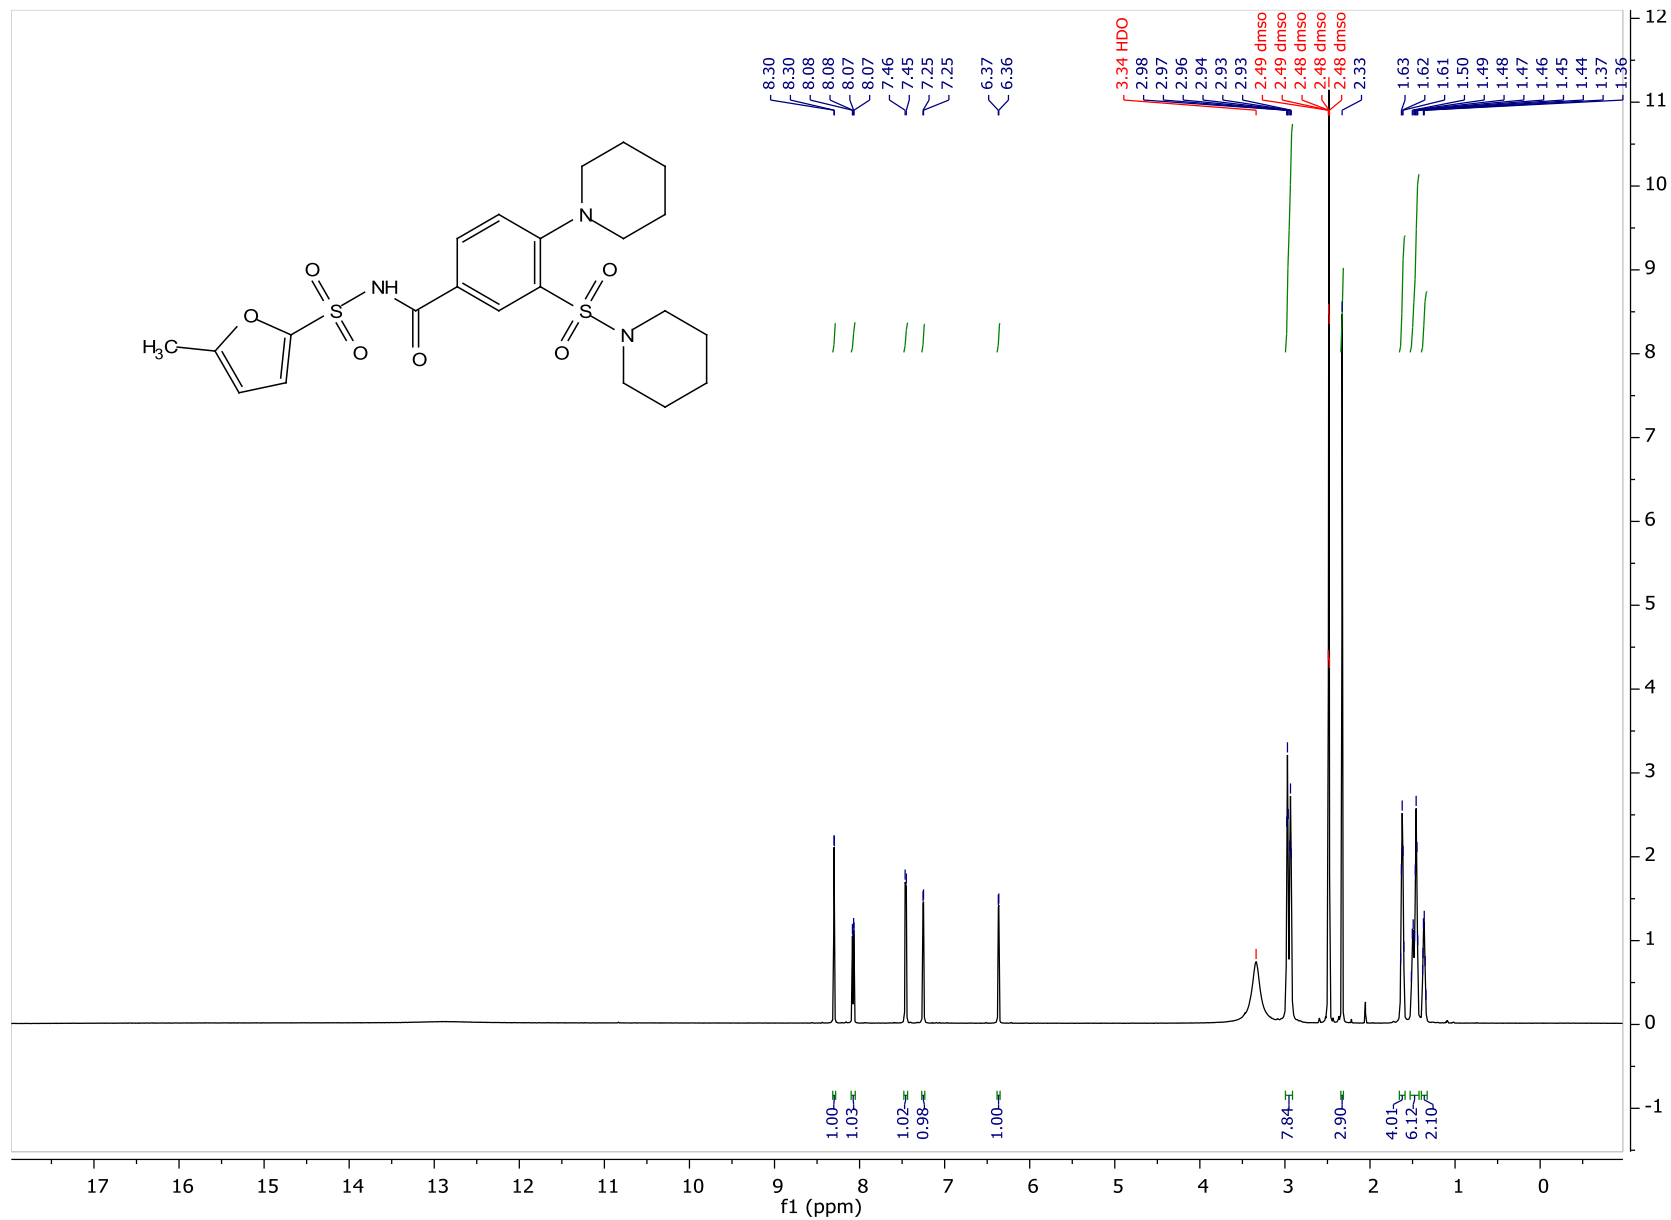

<sup>13</sup>C NMR spectrum of Z4886825504

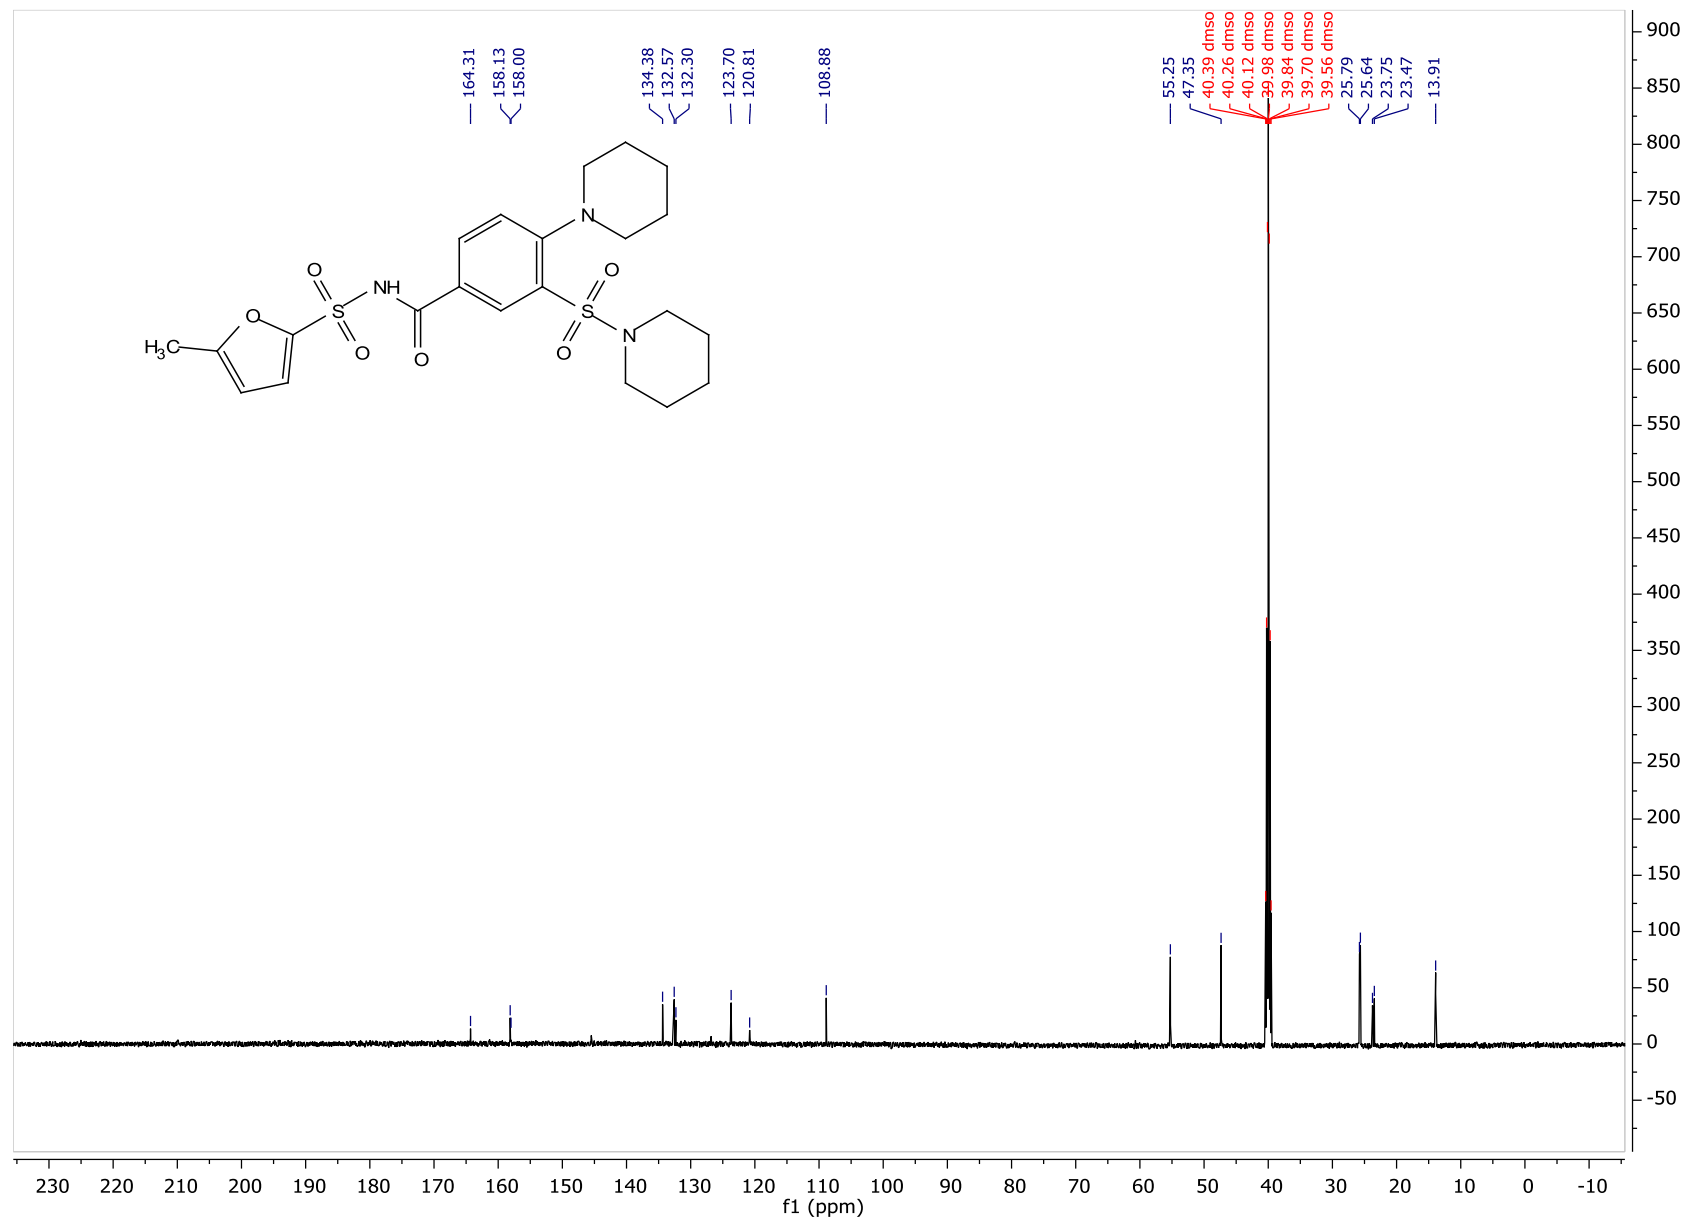

LC/MS spectrum of Z4886825504

Ret\_Time: 1.564 min

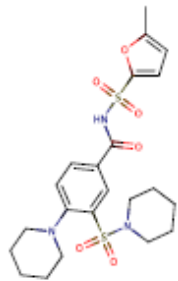

Mol Wt 495.61  
Exact Mass 495.17

| # | Time  | Area%  |
|---|-------|--------|
| 1 | 1.564 | 100.00 |

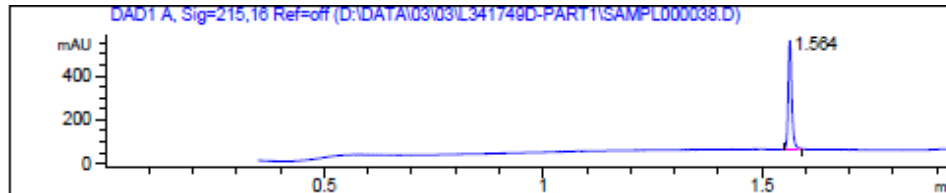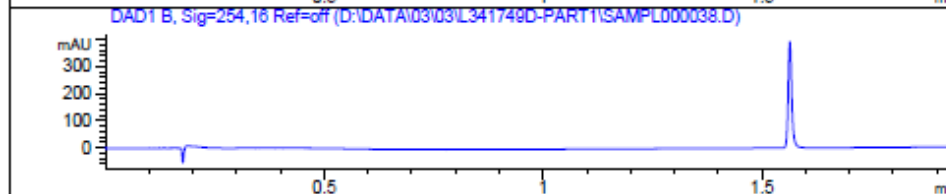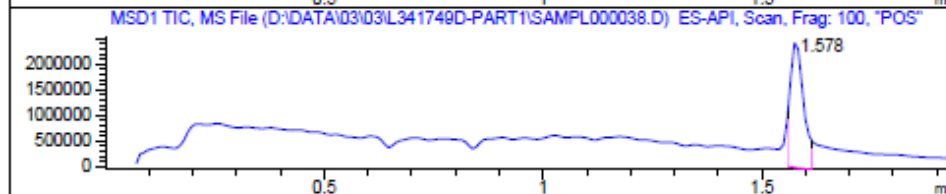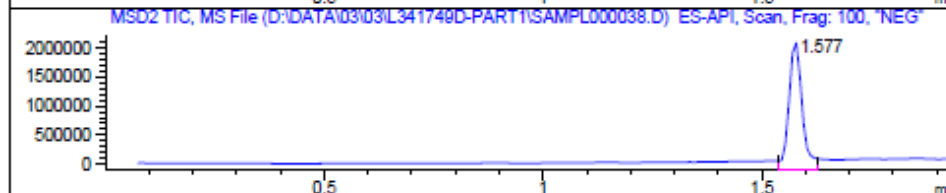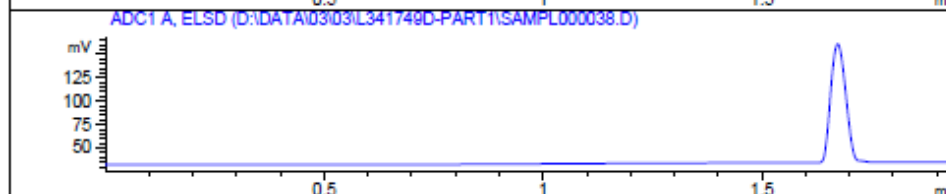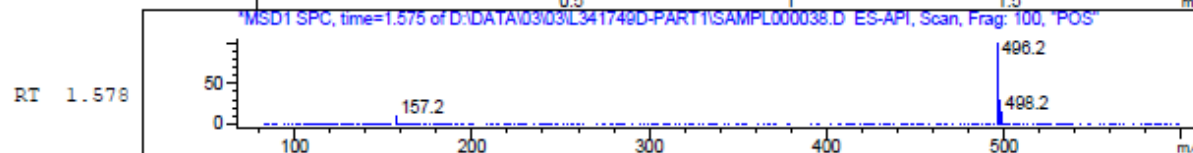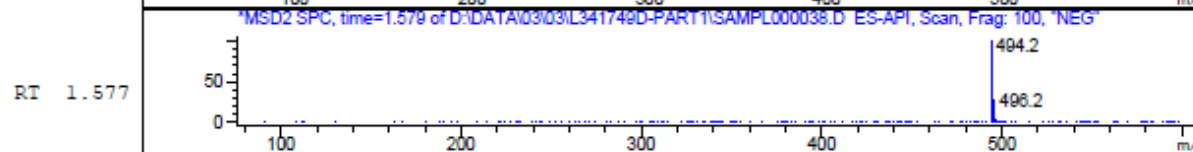

<sup>1</sup>H NMR spectrum of Z4886825509

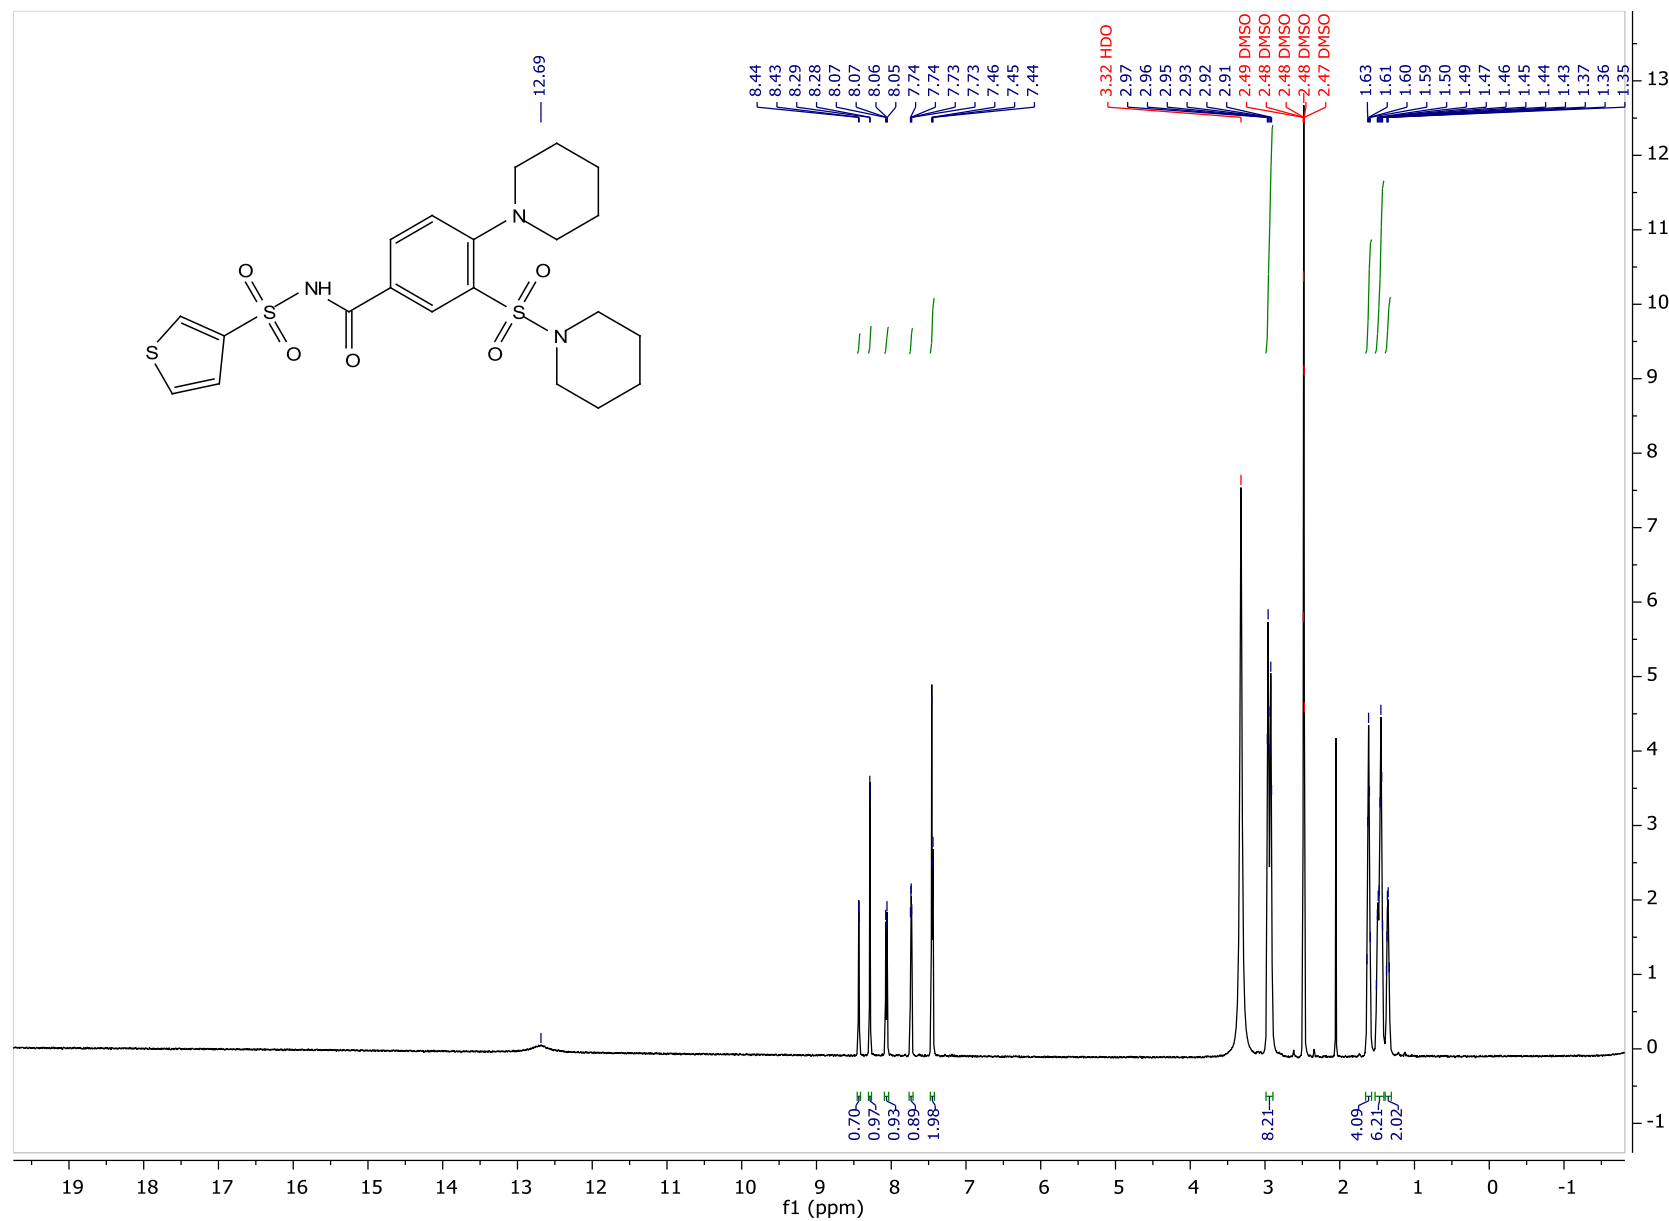

<sup>13</sup>C NMR spectrum of Z4886825509

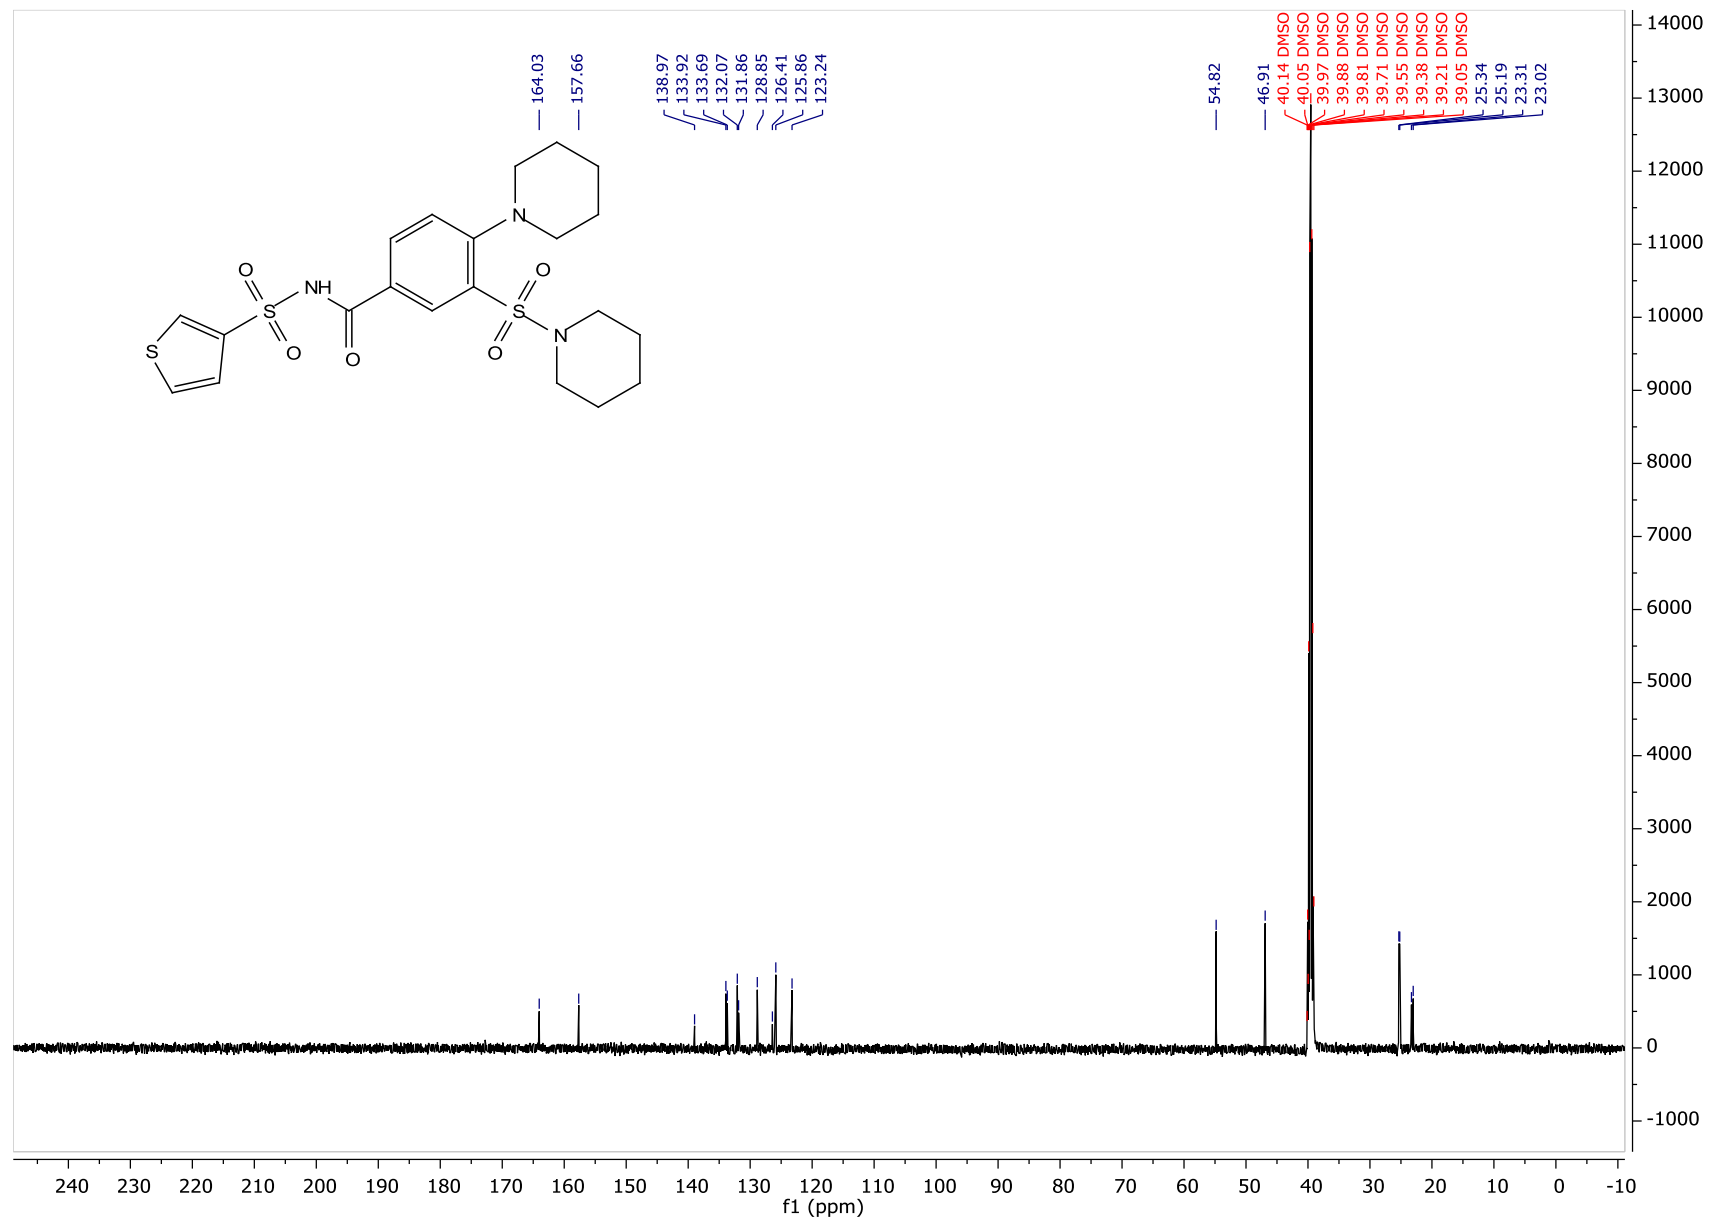

LC/MS spectrum of Z4886825509

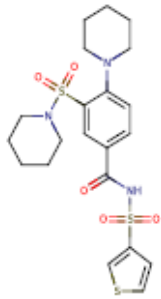

Mol Wt 497.65  
 Exact Mass 497.13

| # | Time  | Area%  |
|---|-------|--------|
| 1 | 1.481 | 100.00 |

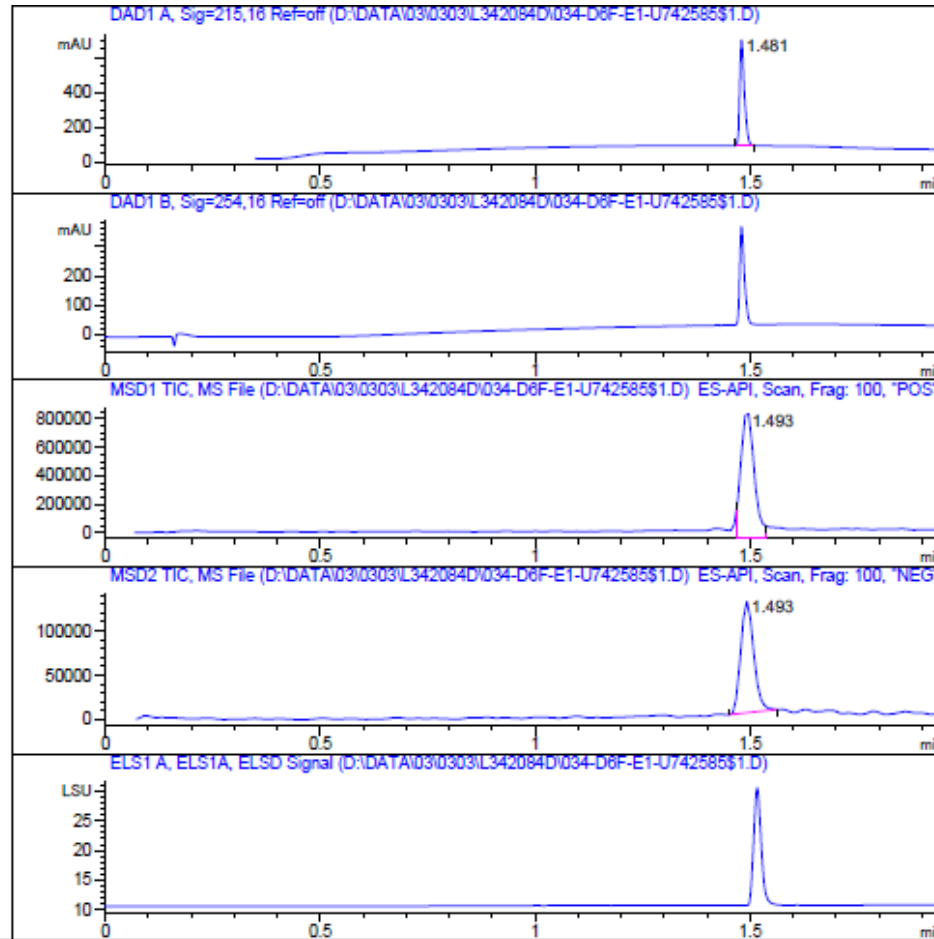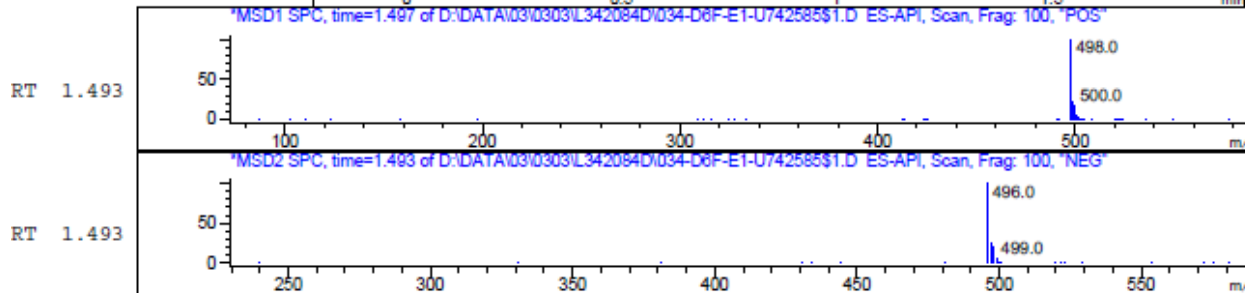

<sup>1</sup>H NMR spectrum of Z4886825517

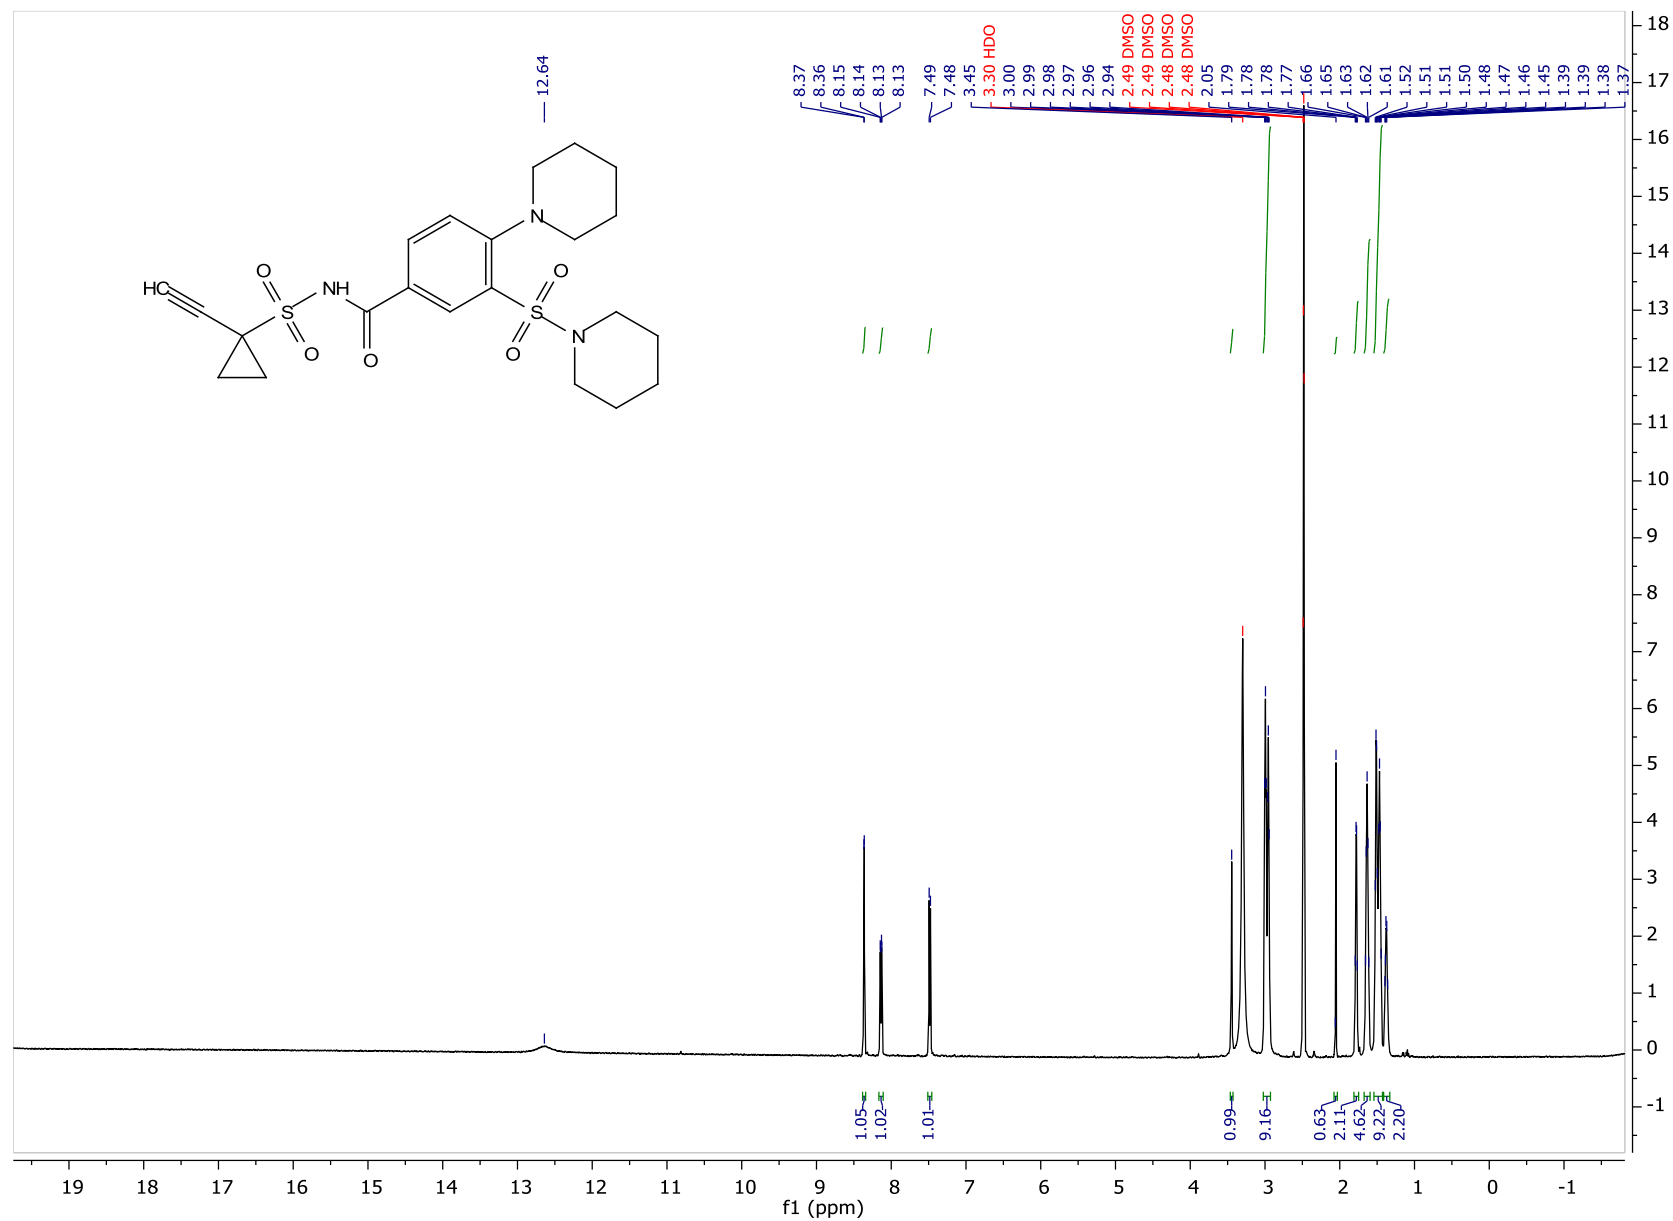



<sup>13</sup>C NMR spectrum of Z4886825517

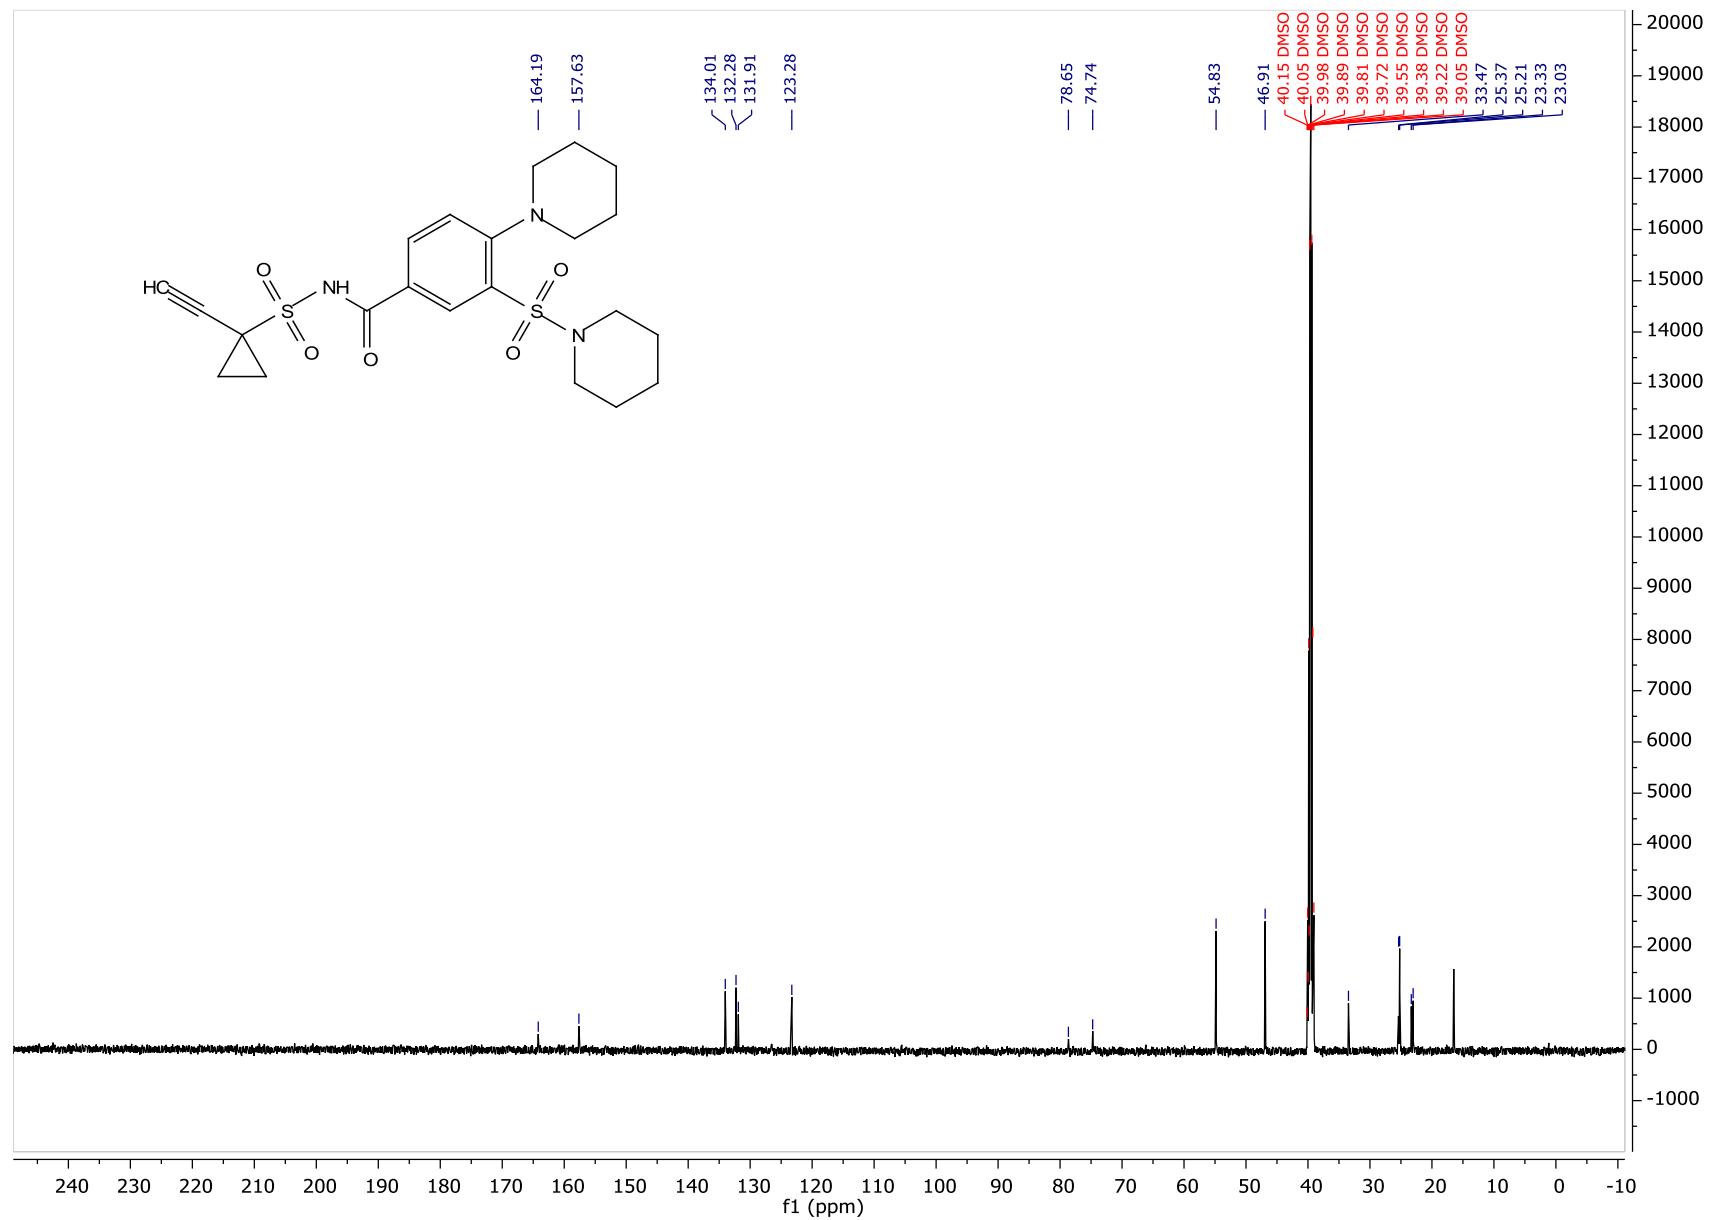

LC/MS spectrum of Z4886825517

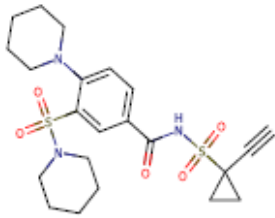

Mol Wt 479.61  
 Exact Mass 479.18

| # | Time  | Area%  |
|---|-------|--------|
| 1 | 1.495 | 100.00 |

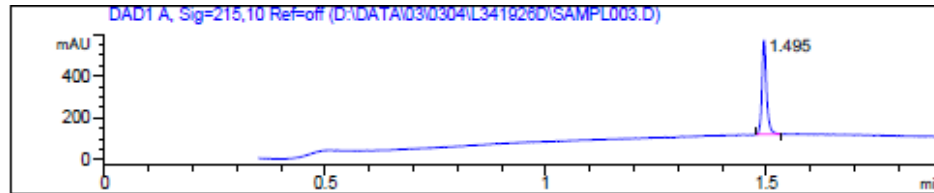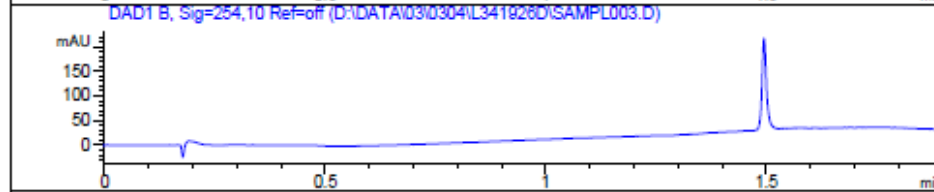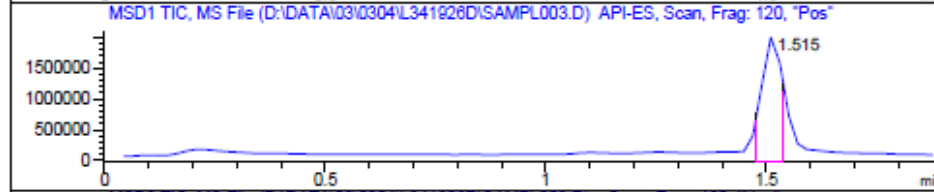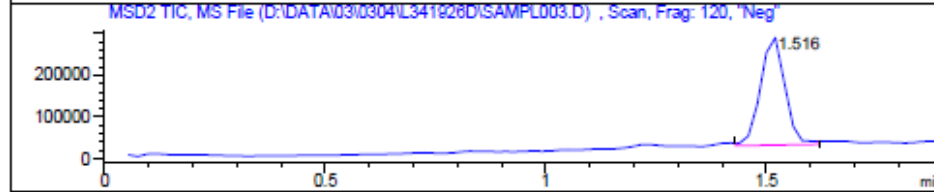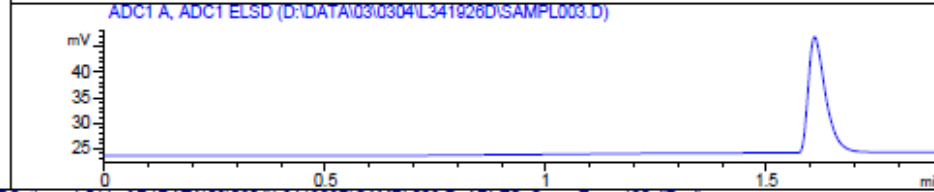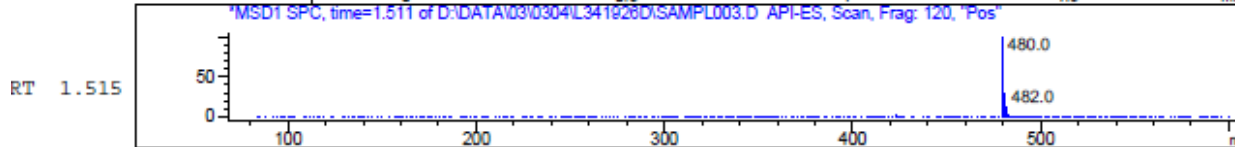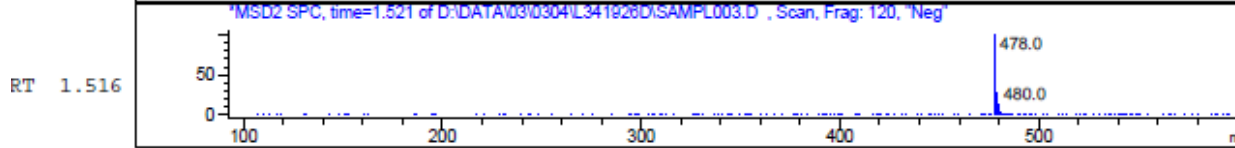

<sup>1</sup>H NMR spectrum of Z4886825521

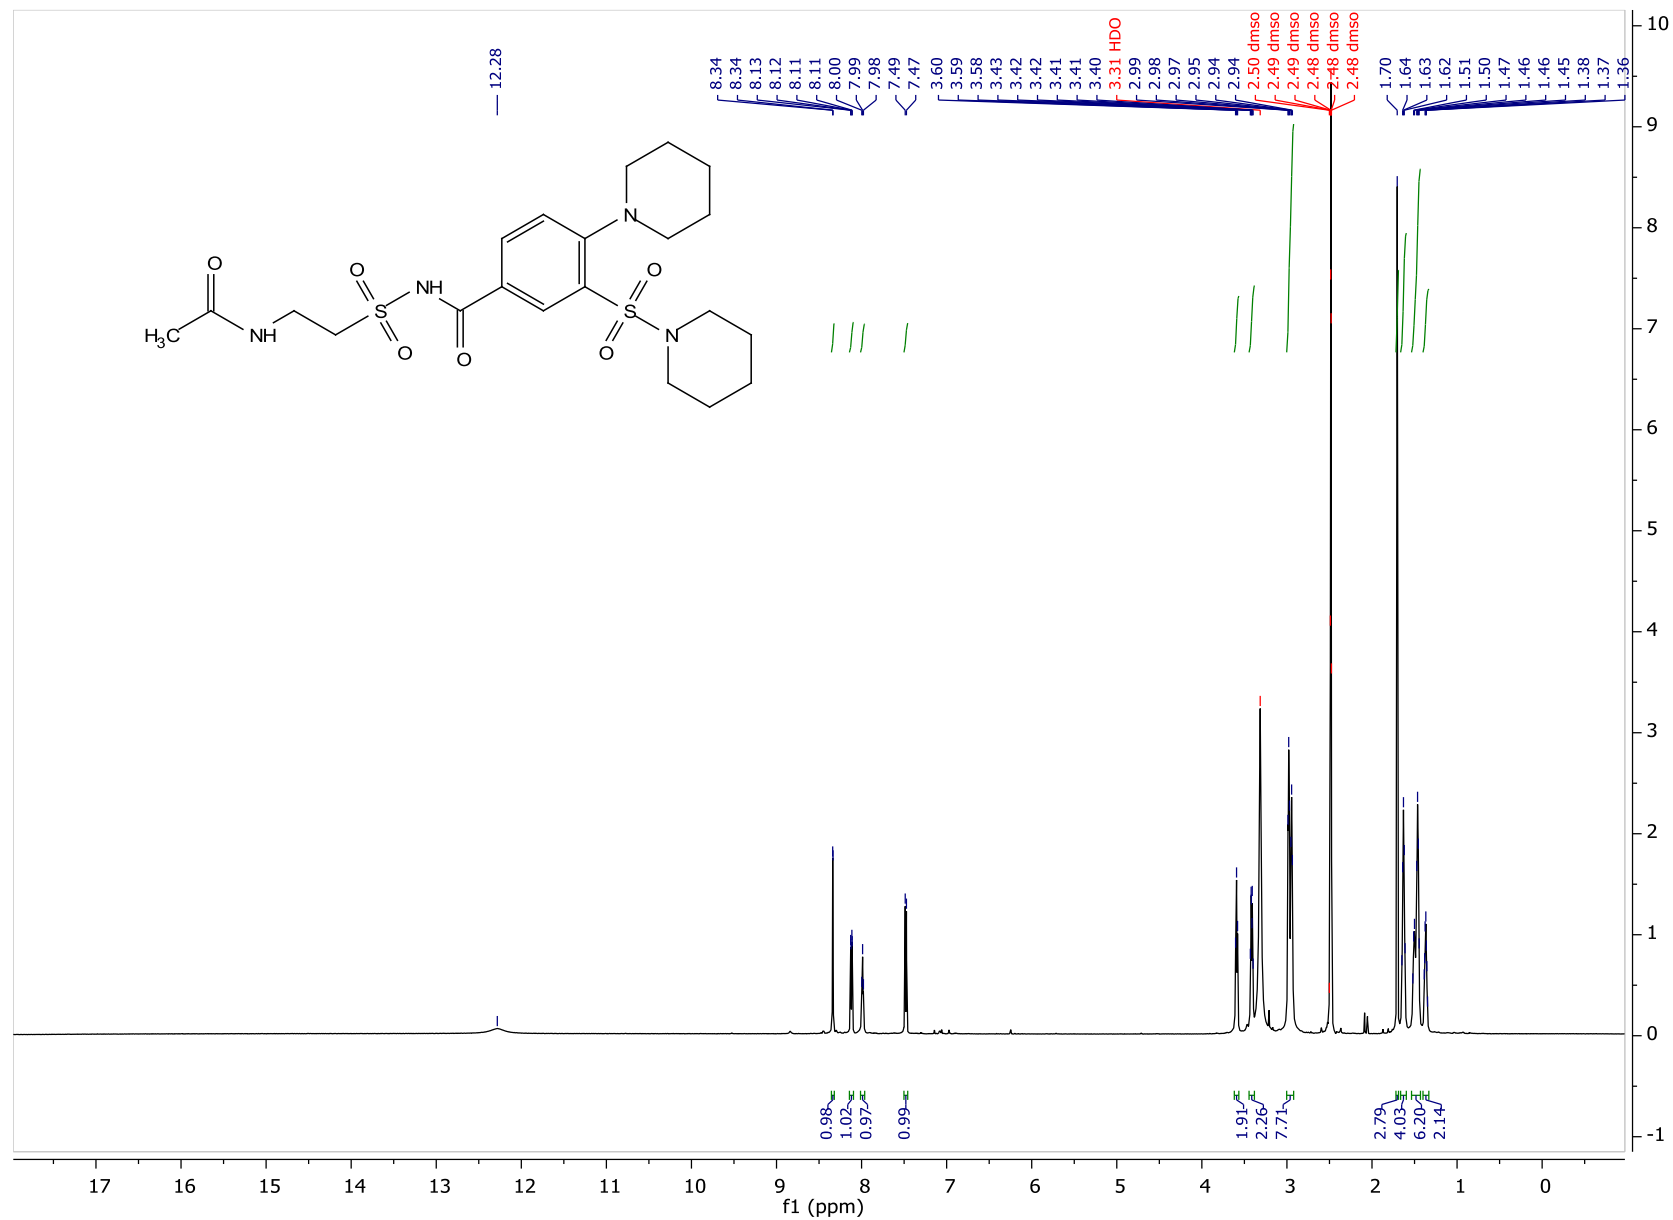

<sup>13</sup>C NMR spectrum of Z4886825521

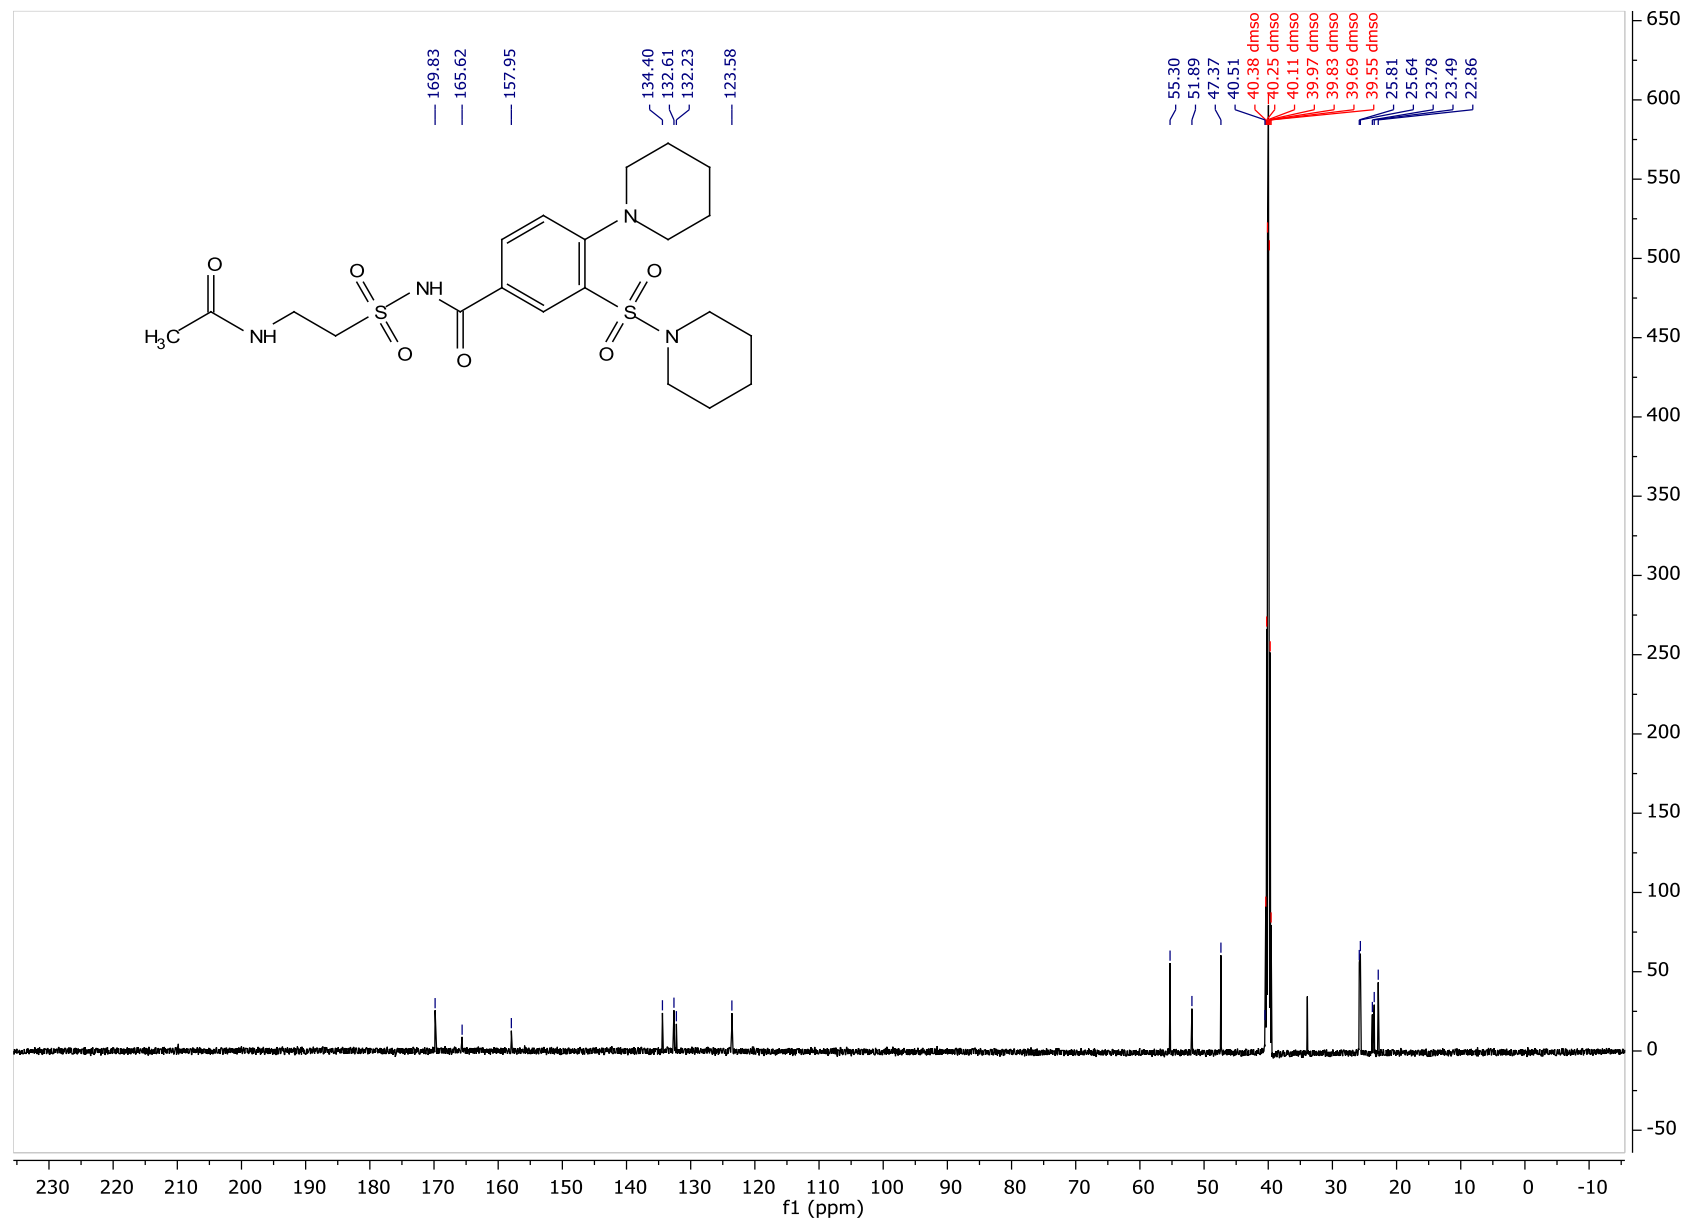

LC/MS spectrum of Z4886825521

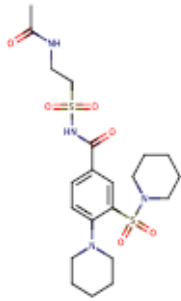

Mol Wt 500.63  
 Exact Mass 500.2

| # | Time  | Area%  |
|---|-------|--------|
| 1 | 1.332 | 100.00 |

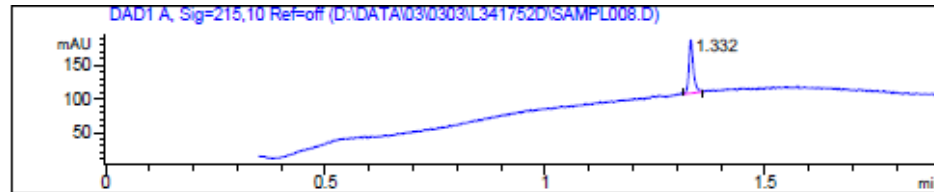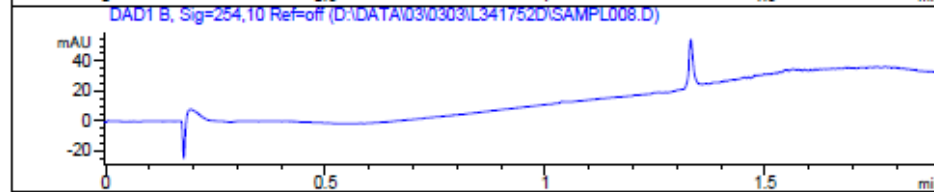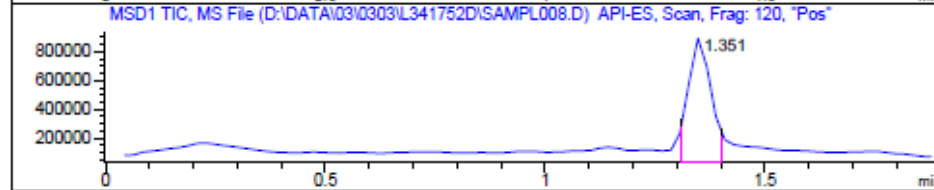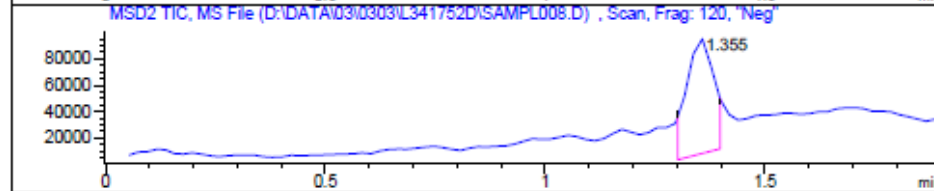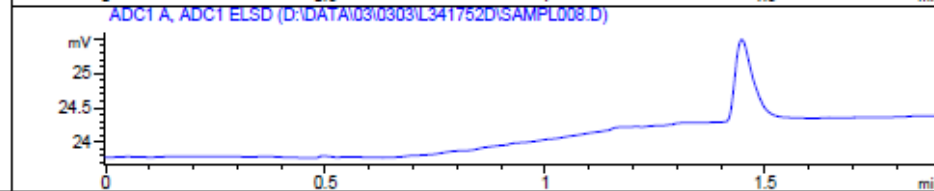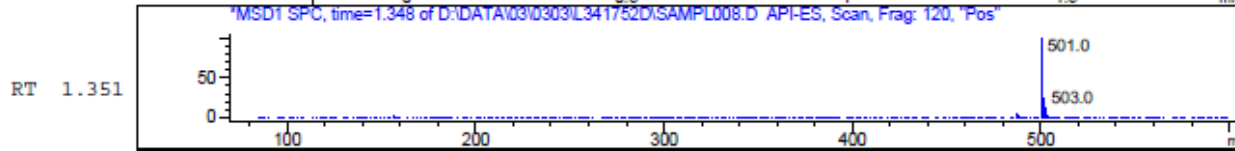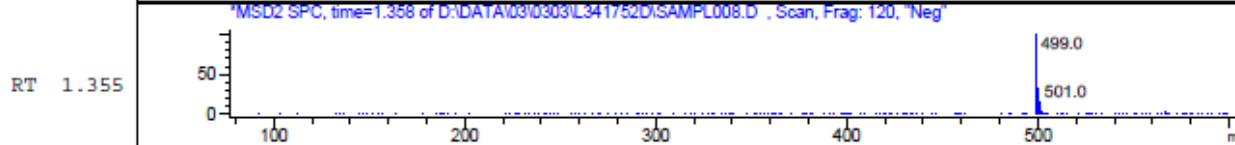

<sup>1</sup>H NMR spectrum of Z4886825525

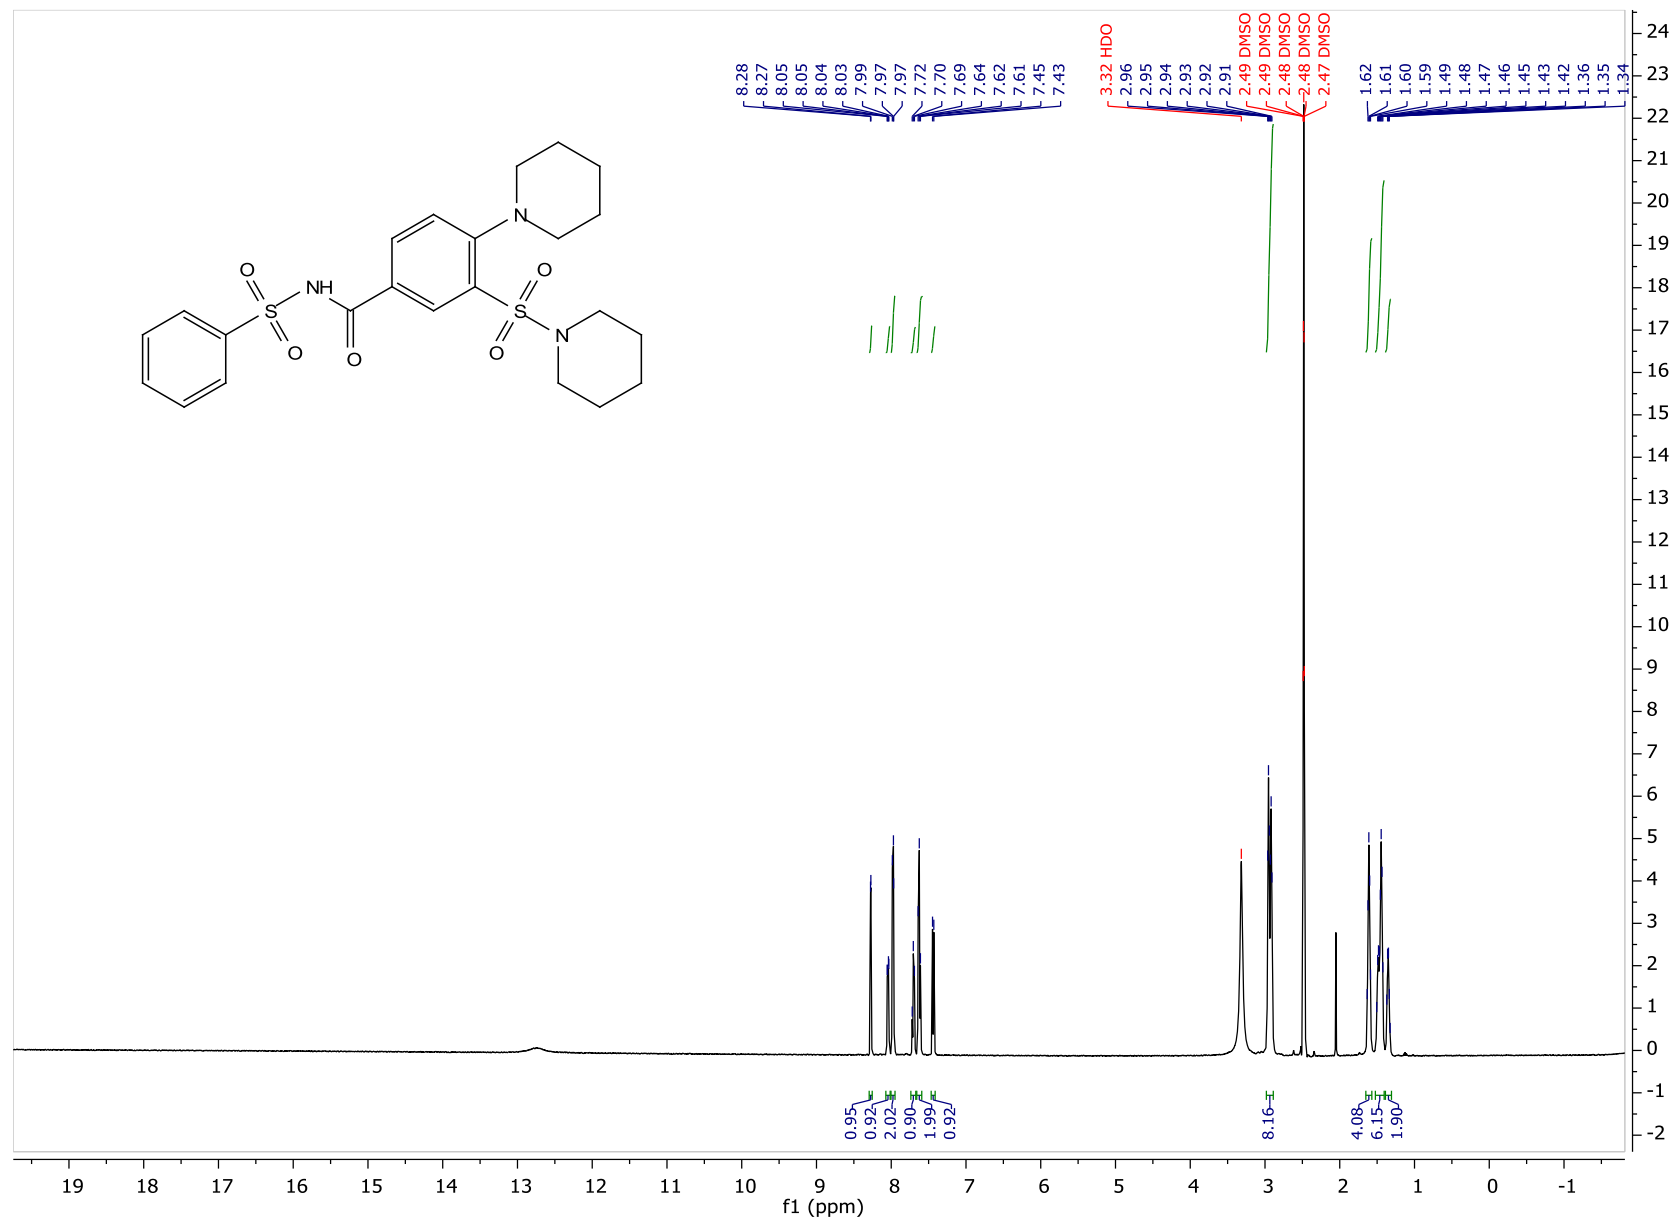

<sup>13</sup>C NMR spectrum of Z4886825525

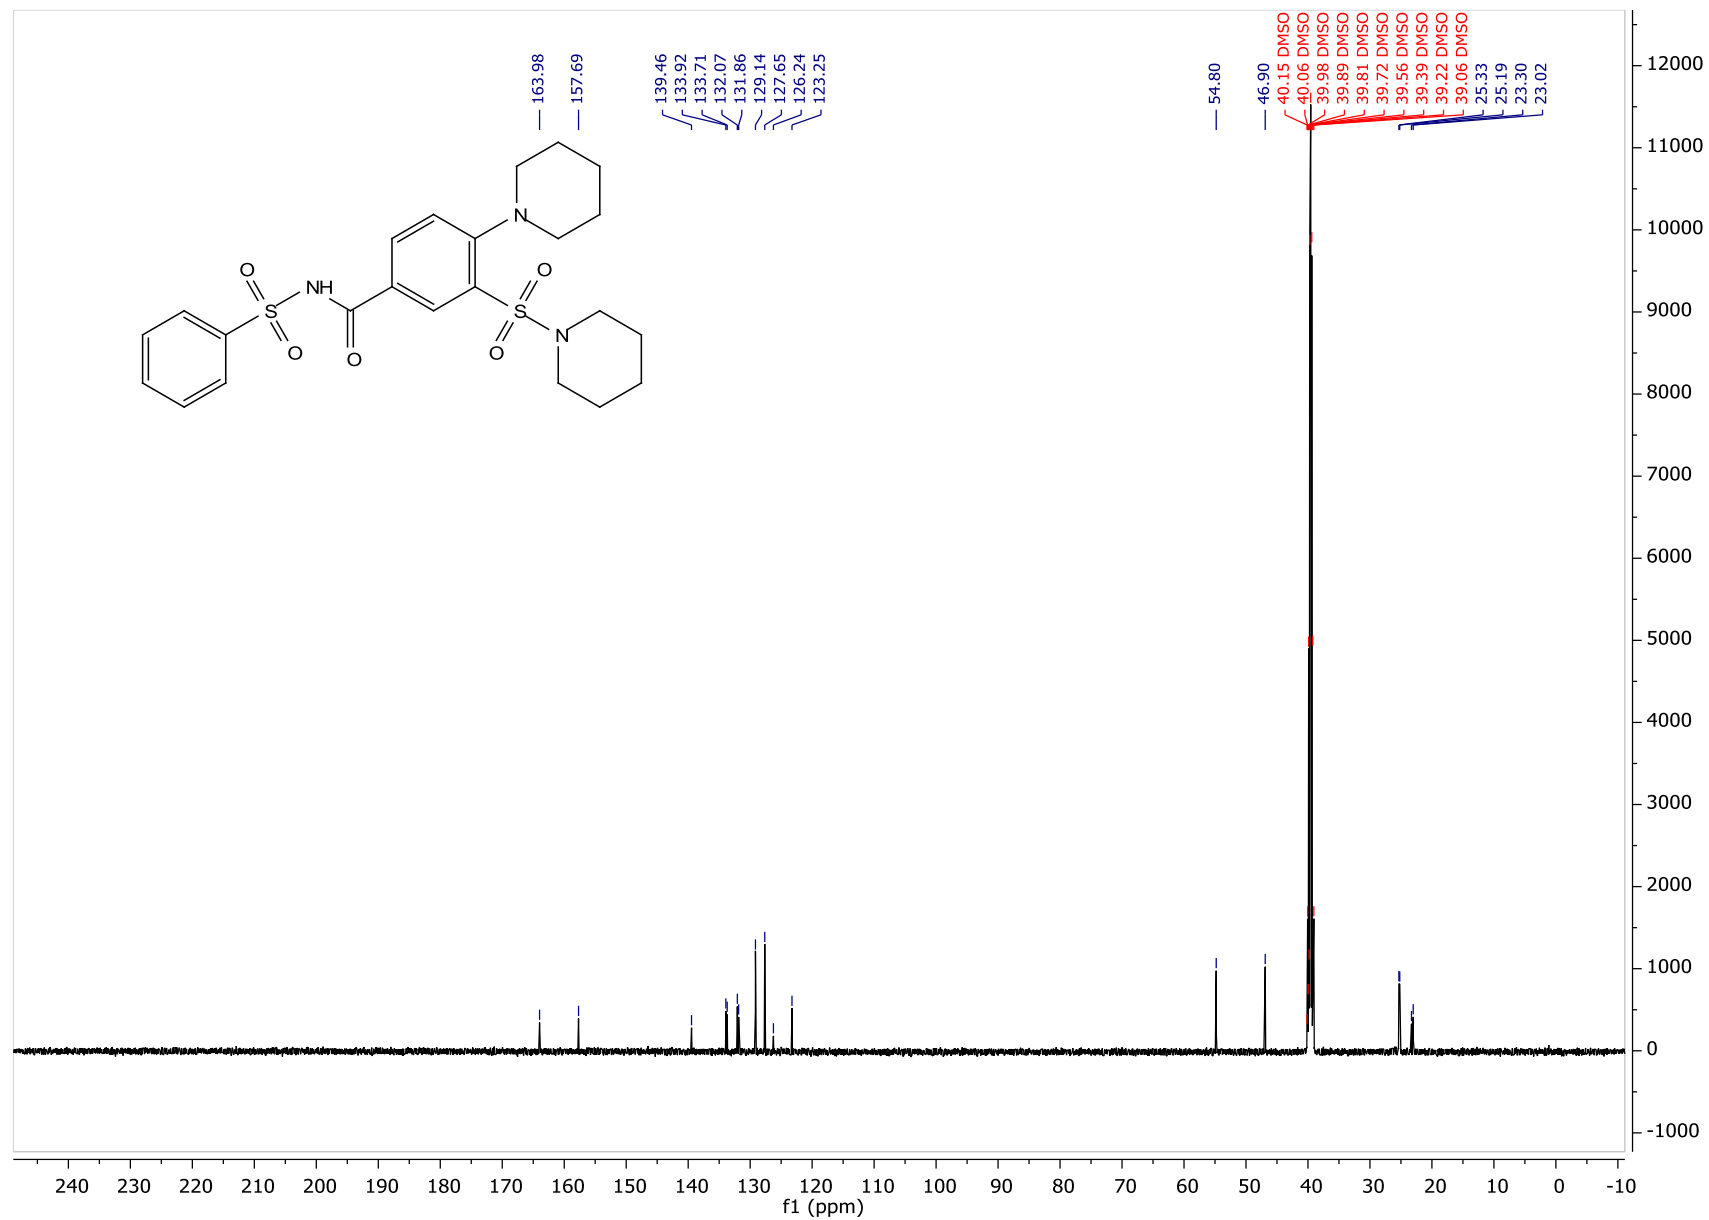

LC/MS spectrum of Z4886825525

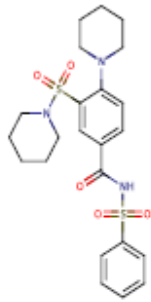

Mol Wt 491.62  
 Exact Mass 491.18

| # | Time  | Area%  |
|---|-------|--------|
| 1 | 1.365 | 100.00 |

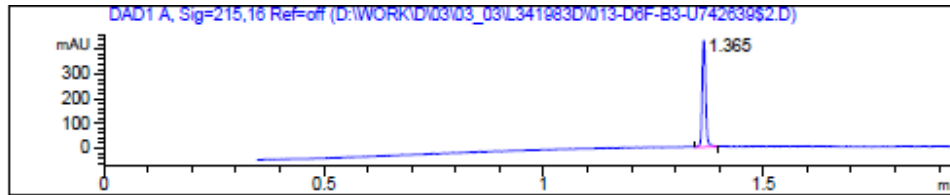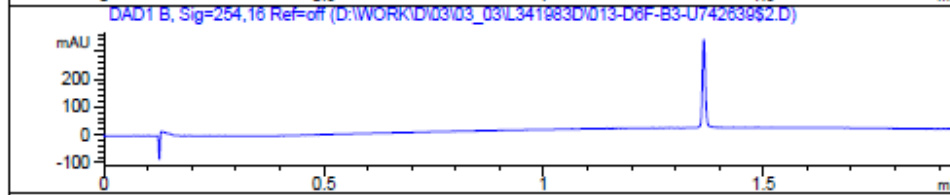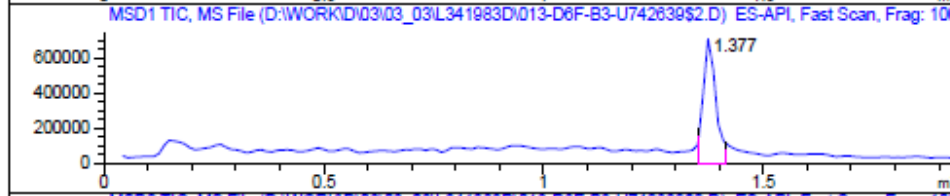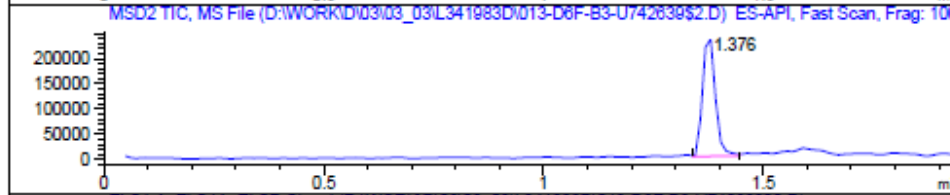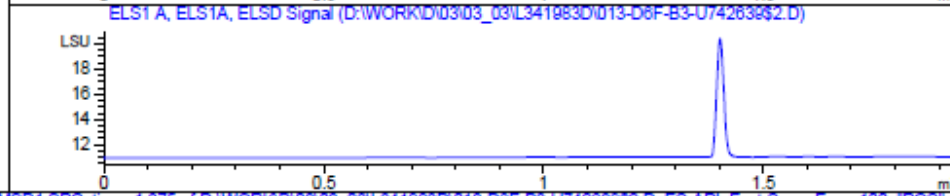

RT 1.377

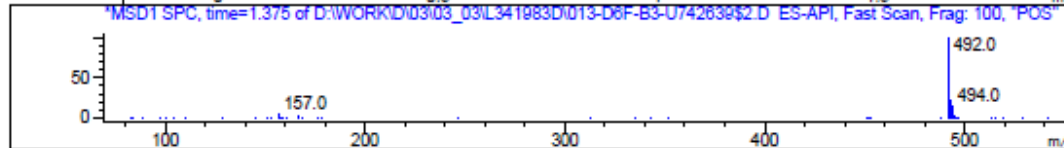

RT 1.376

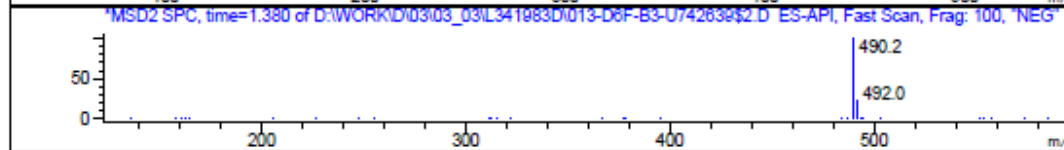



<sup>1</sup>H NMR spectrum of Z4886924423

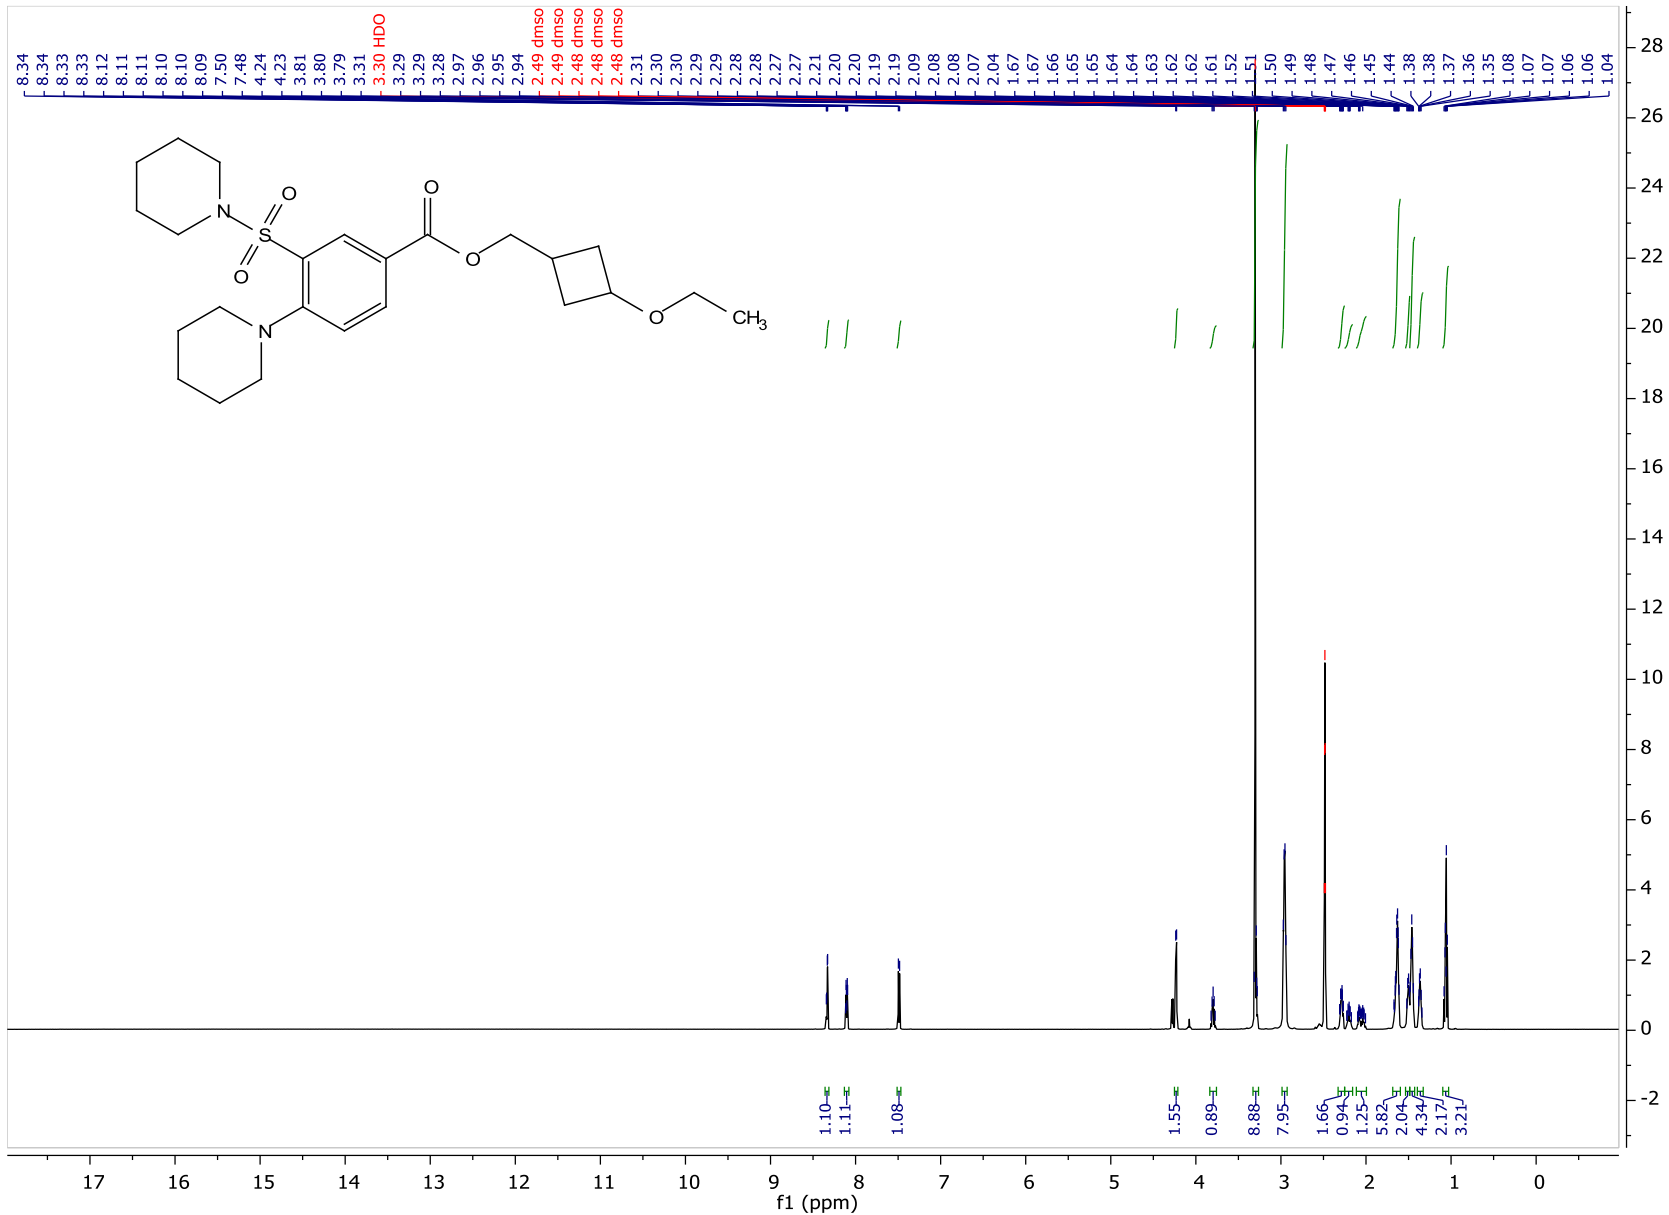

<sup>13</sup>C NMR spectrum of Z4886924423

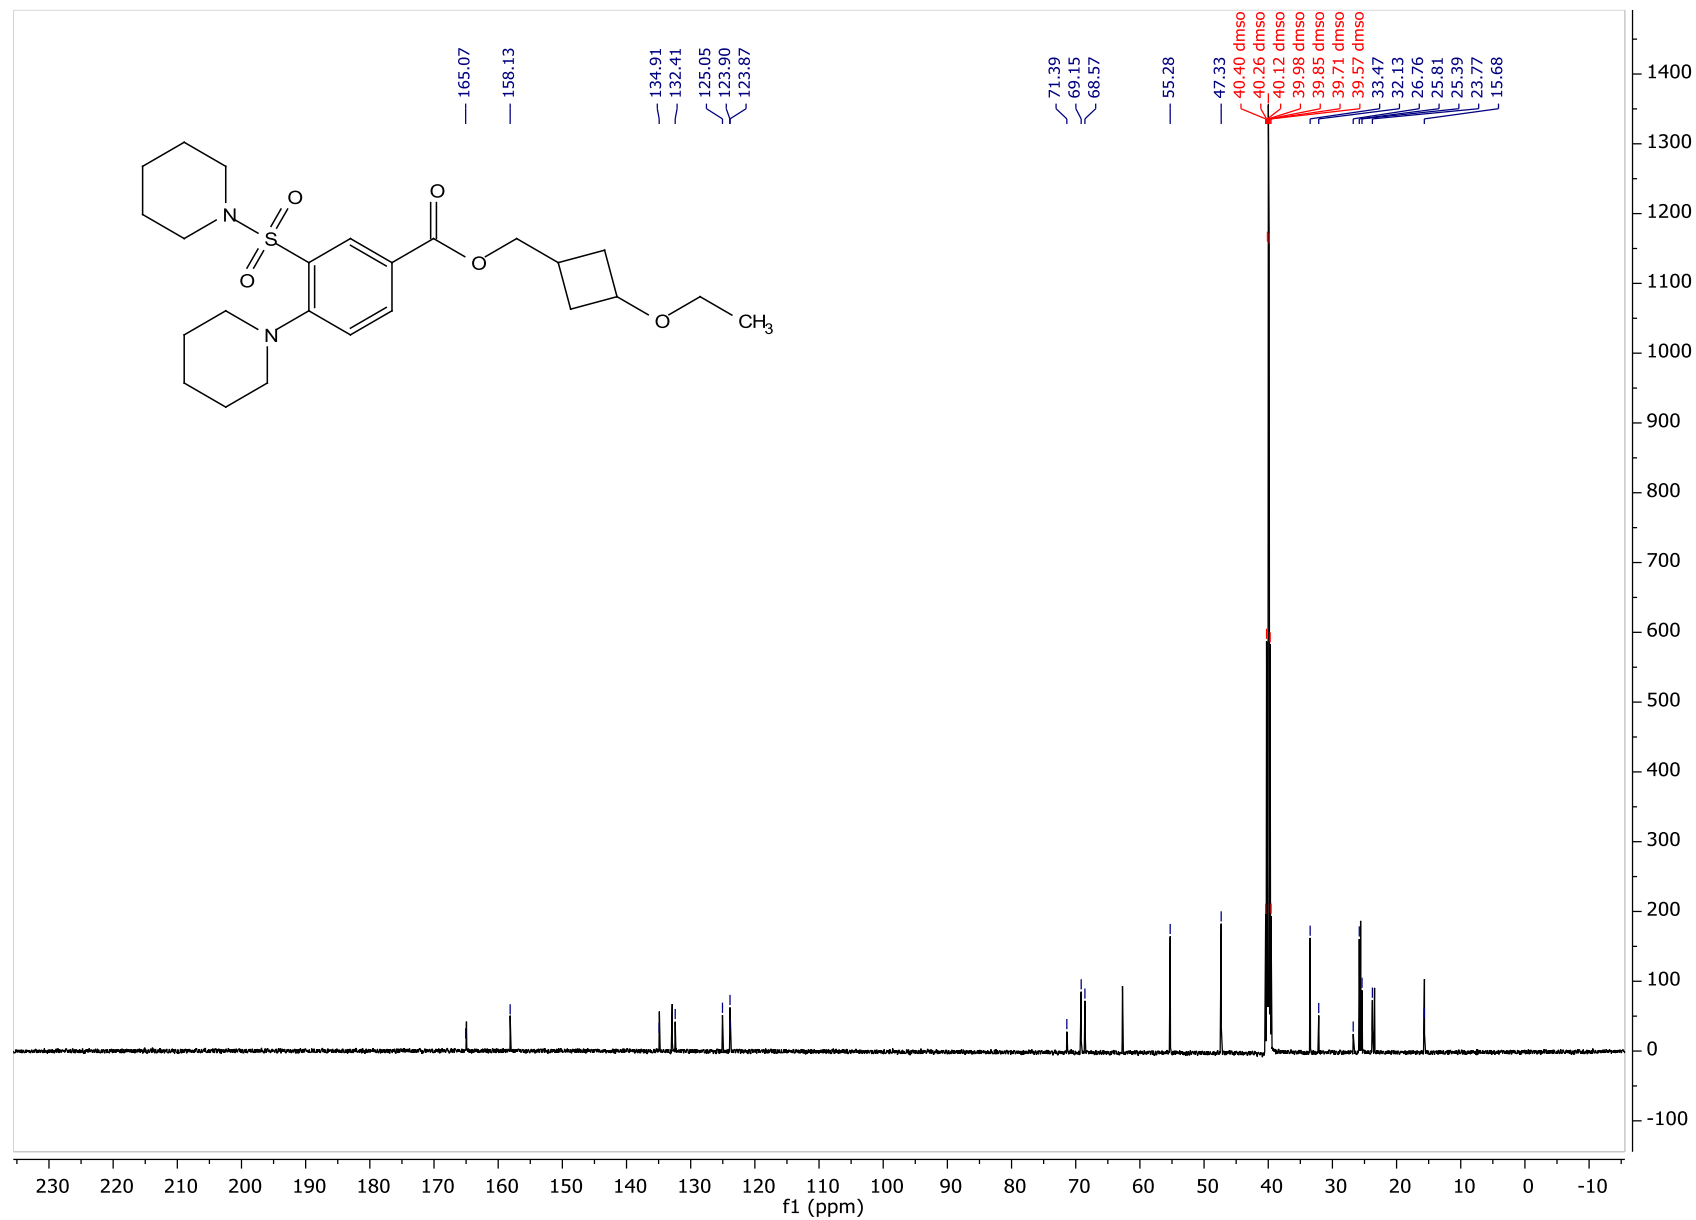

LC/MS spectrum of Z4886924423

Ret\_Time: 1.758 min

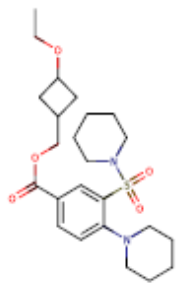

Mol Wt 464.62  
 Exact Mass 464.28

| # | Time  | Area%  |
|---|-------|--------|
| 1 | 1.758 | 100.00 |

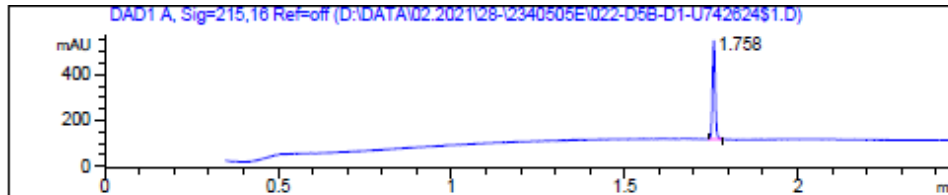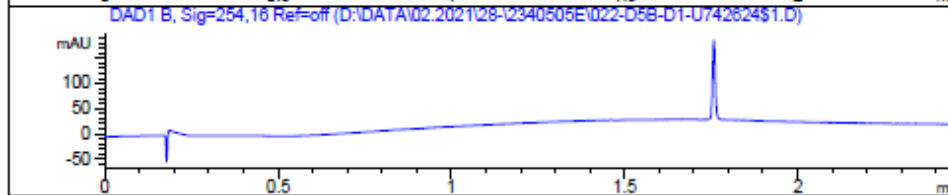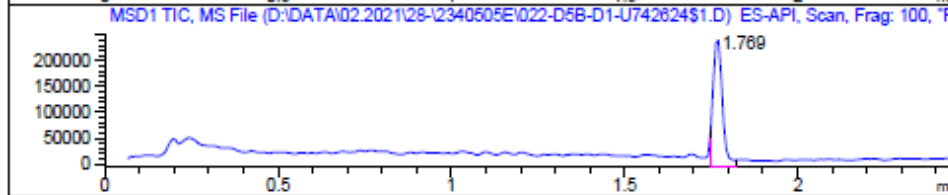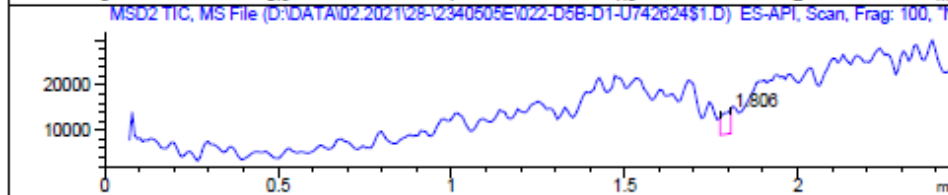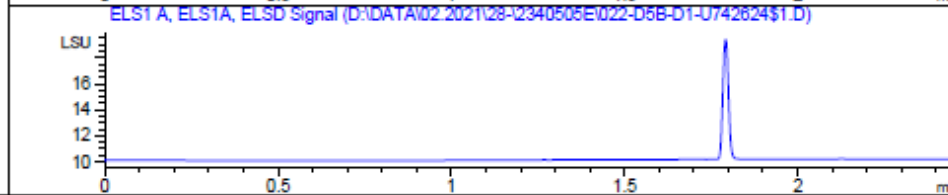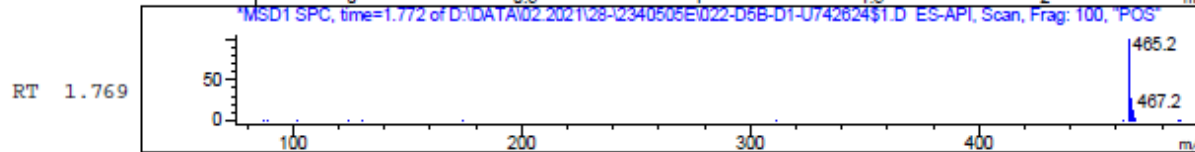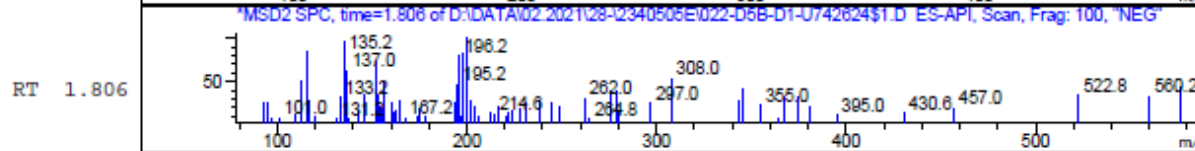

<sup>1</sup>H NMR spectrum of Z4886924680

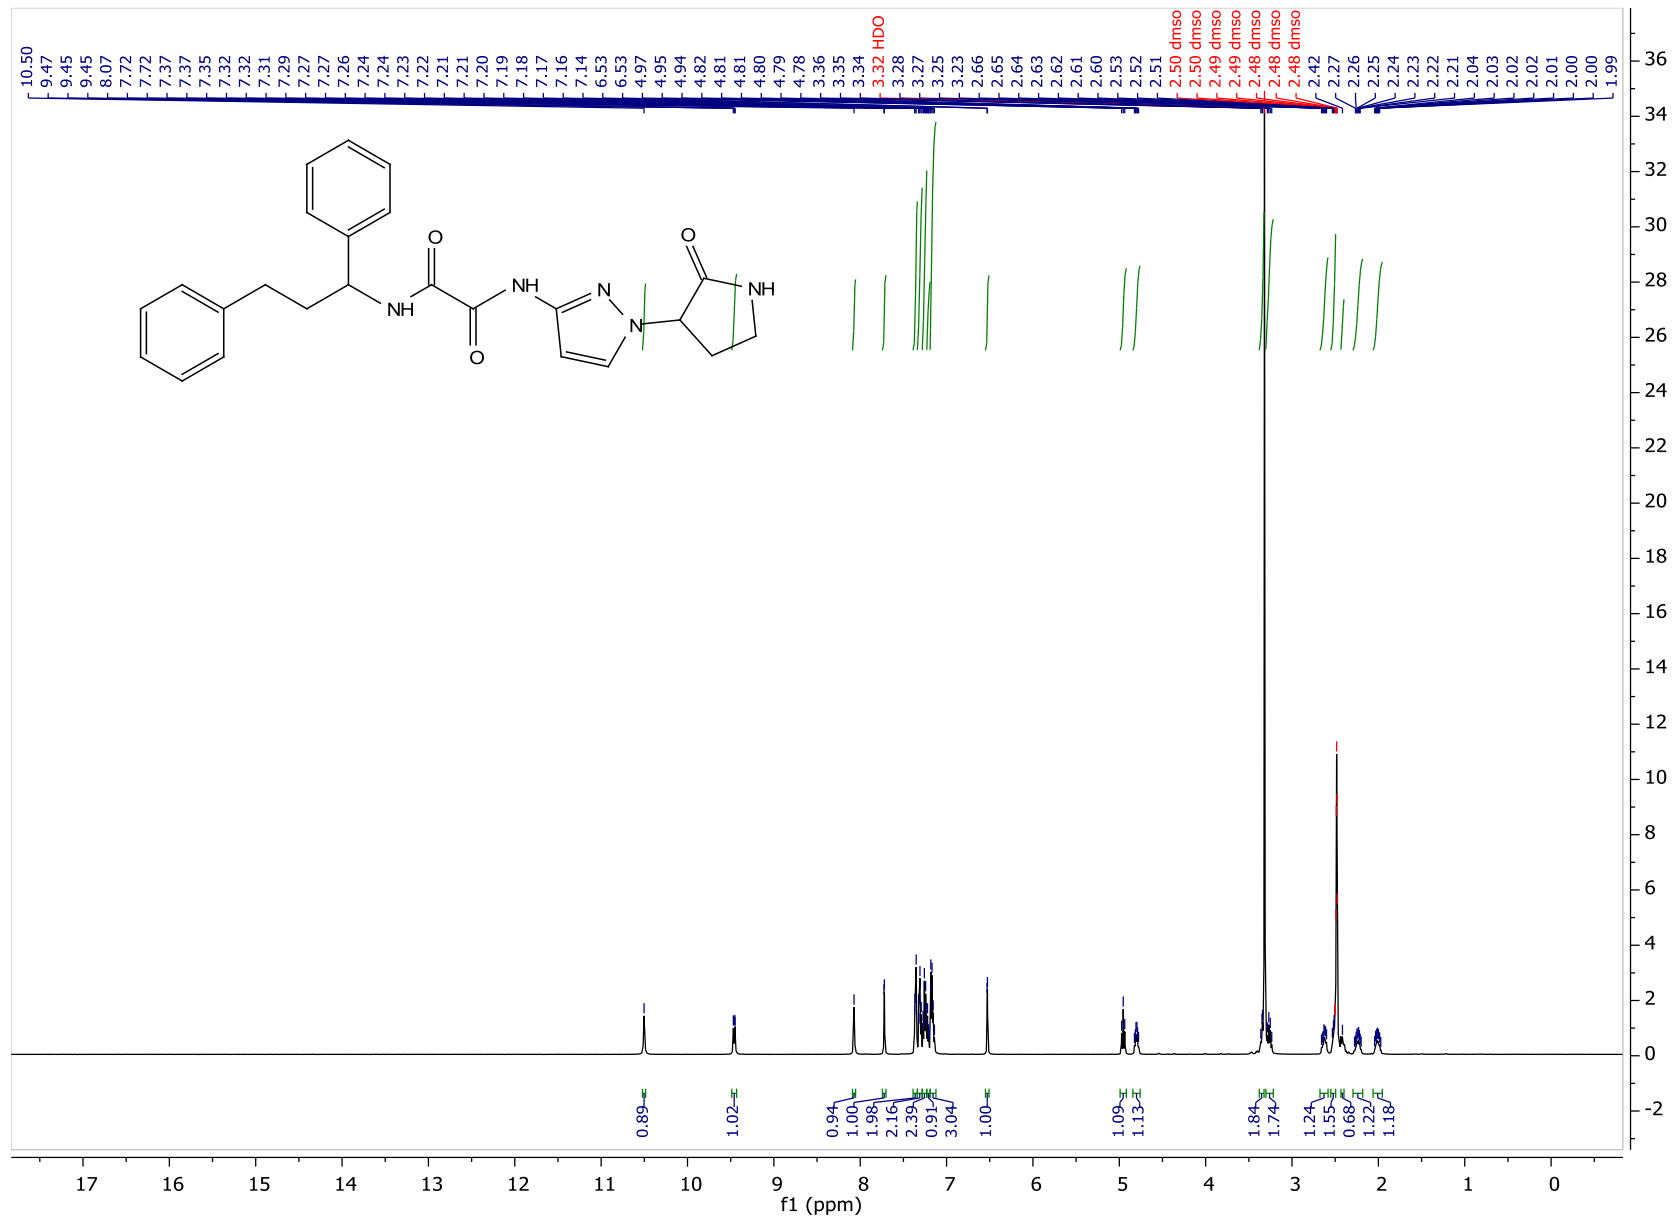

<sup>13</sup>C NMR spectrum of Z4886924680

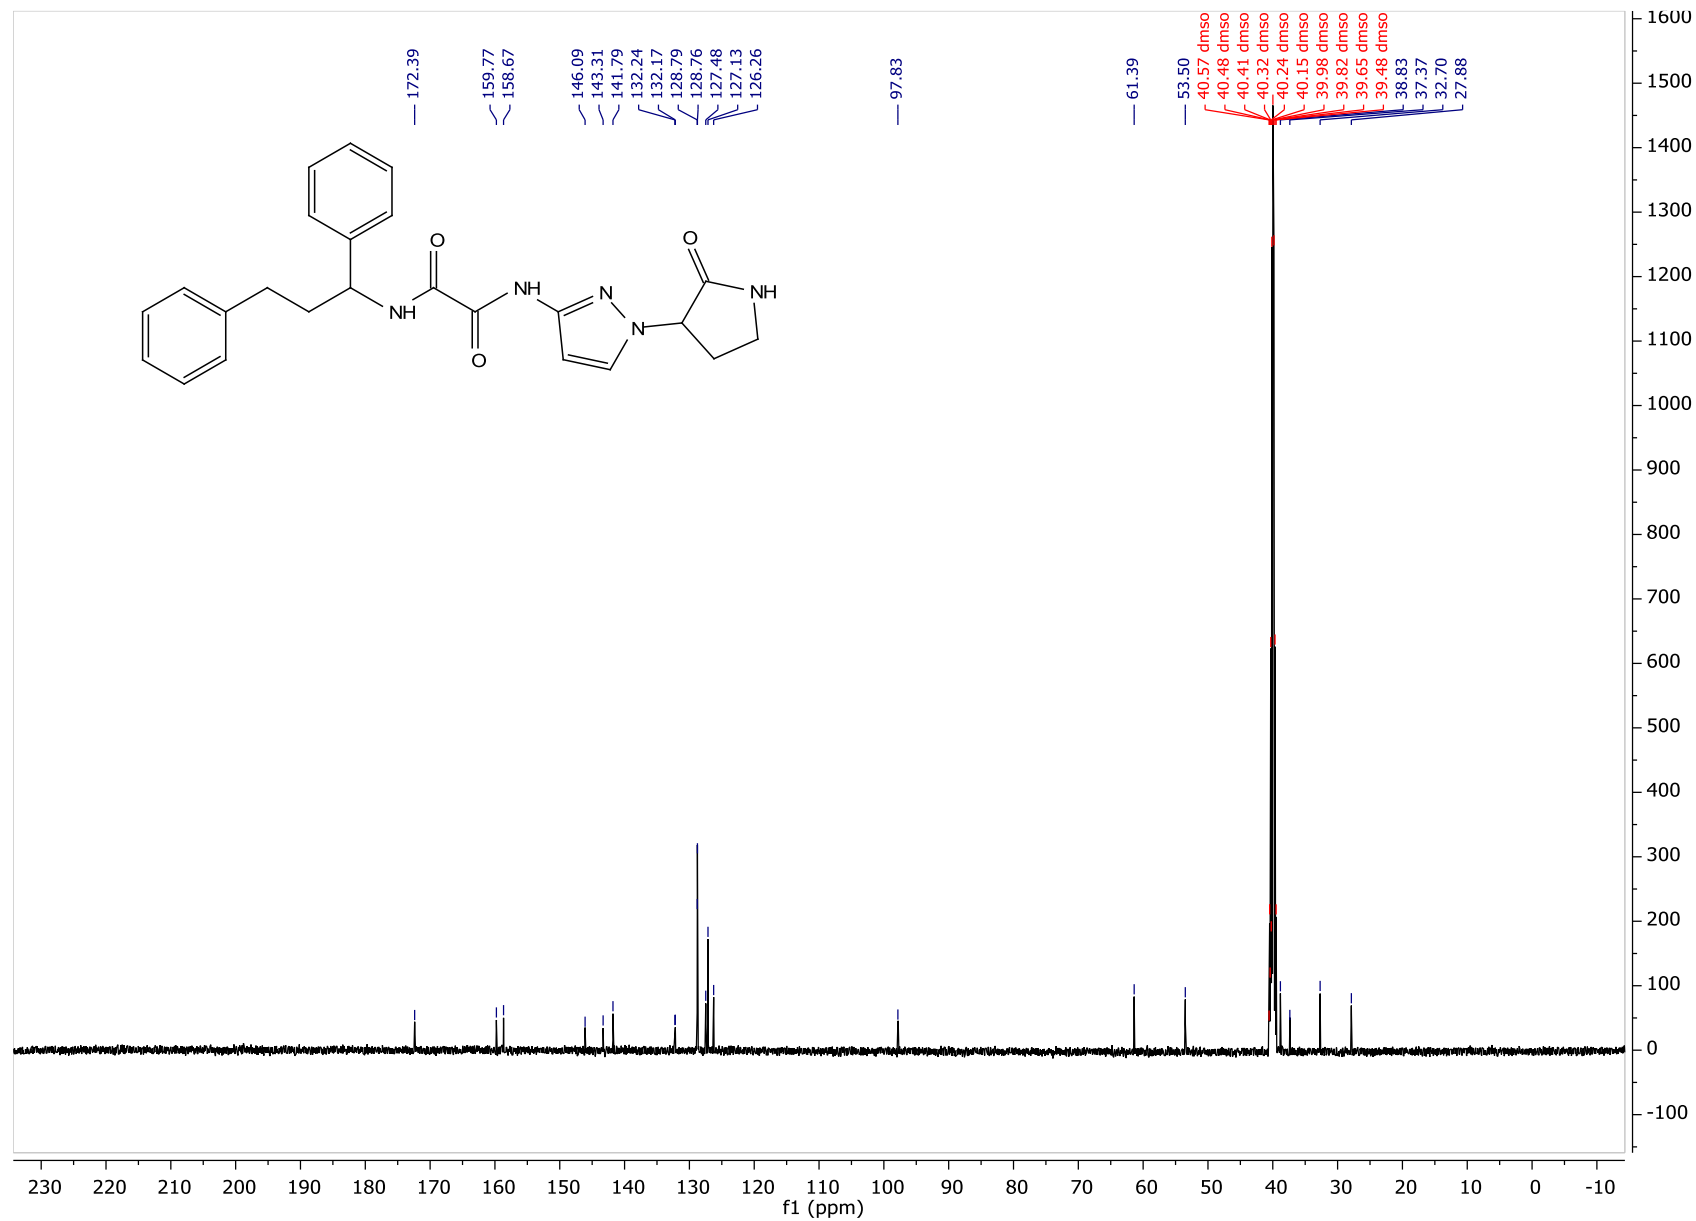

LC/MS spectrum of Z4886924680

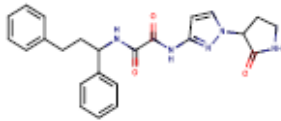

Mol Wt 431.49  
 Exact Mass 431.22

| # | Time  | Area%  |
|---|-------|--------|
| 1 | 1.264 | 100.00 |

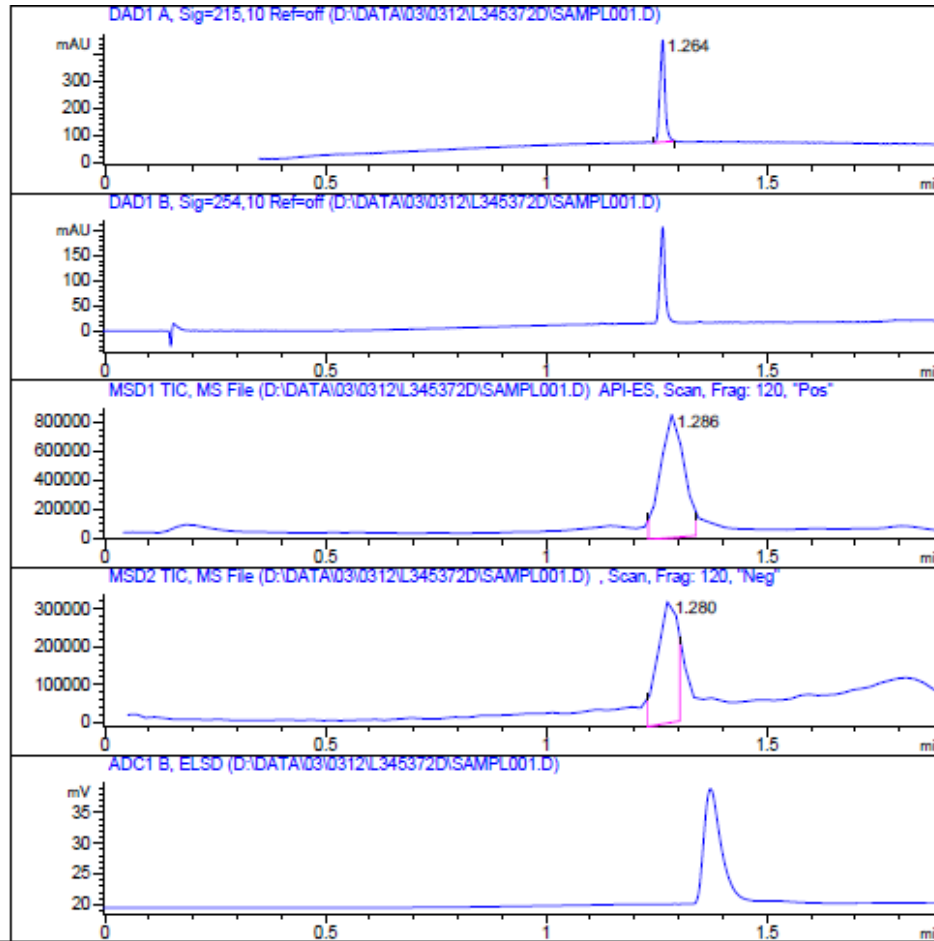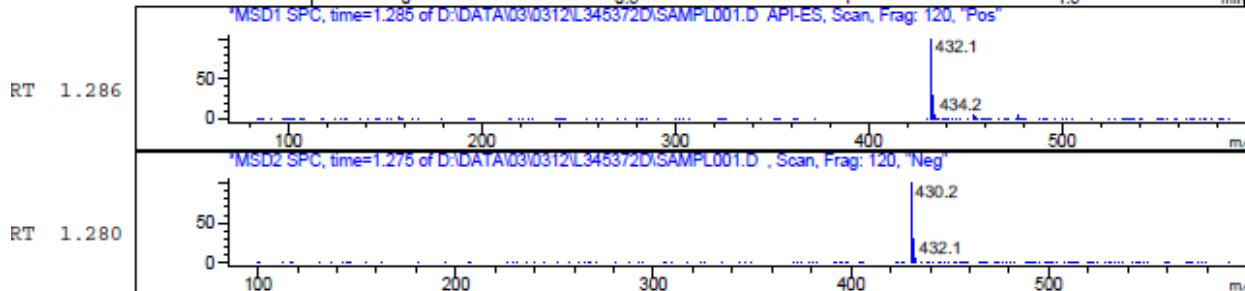

<sup>1</sup>H NMR spectrum of Z4886924738

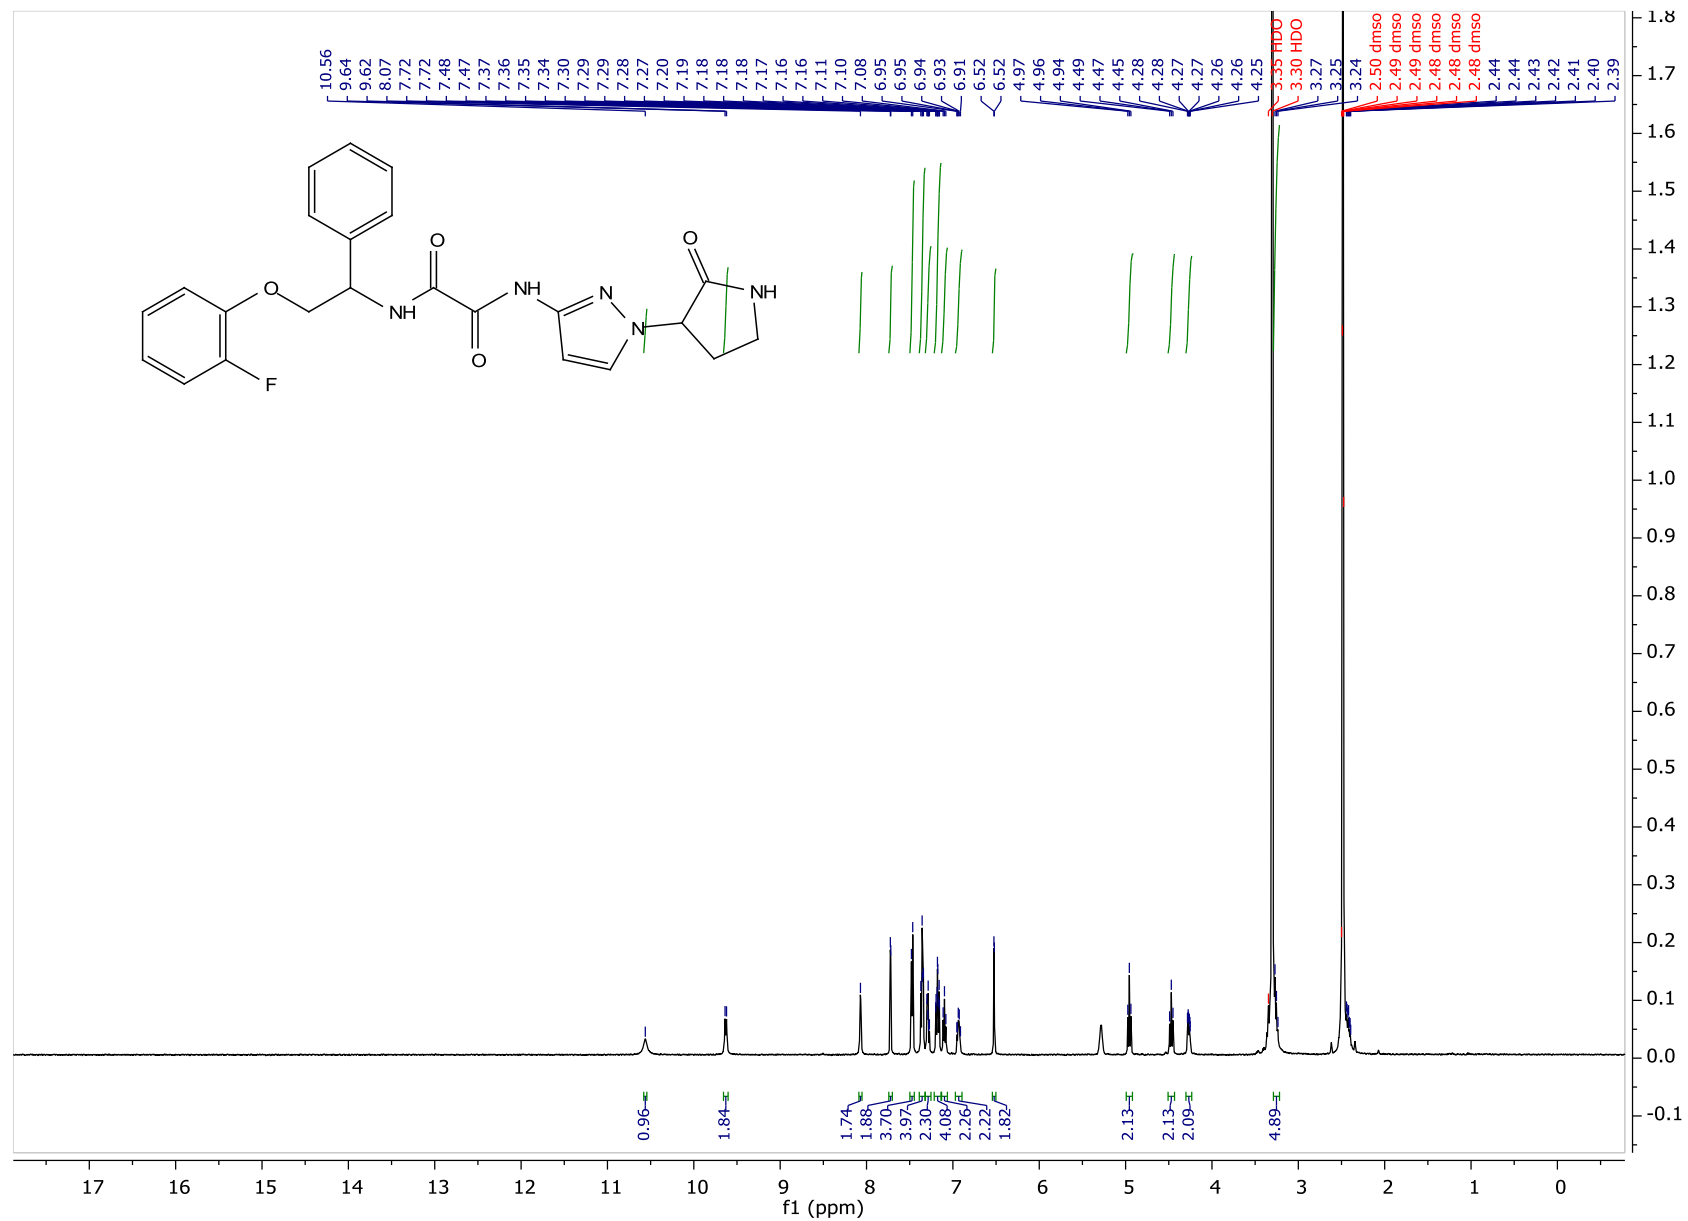

LC/MS spectrum of Z4886924738

Ret\_Time: 1.193 min

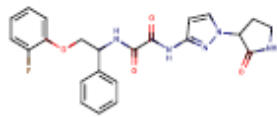

Mol Wt 451.45  
Exact Mass 451.18

| # | Time  | Area%  |
|---|-------|--------|
| 1 | 1.193 | 100.00 |

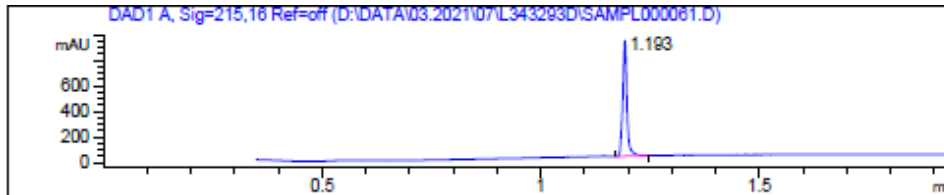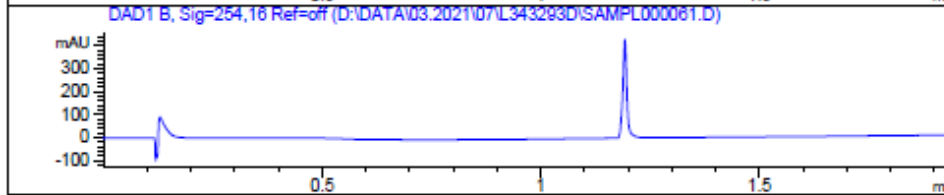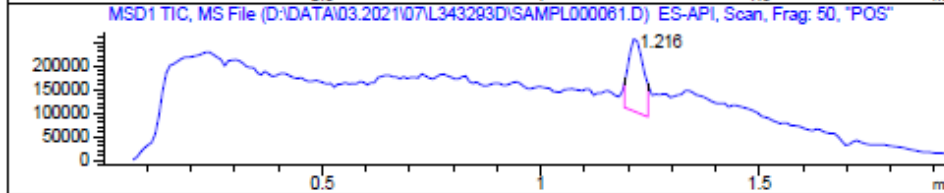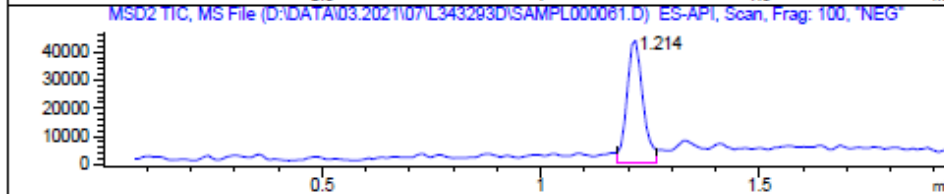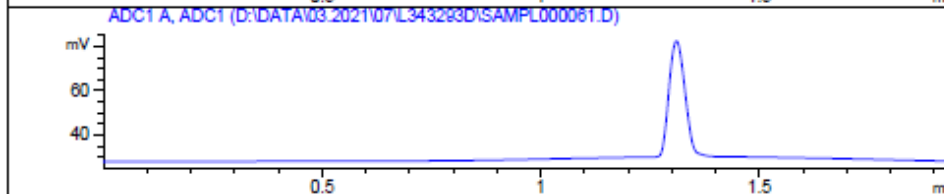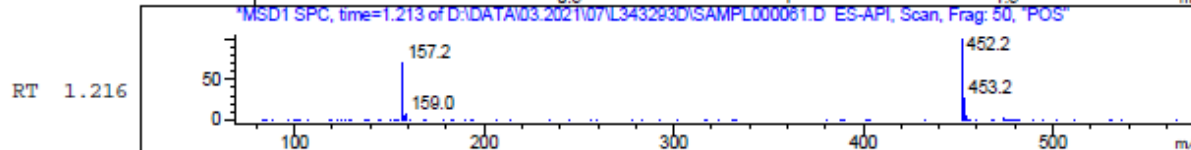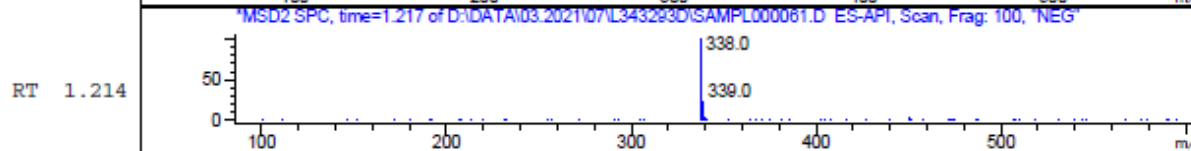



<sup>1</sup>H NMR spectrum of Z4886924881

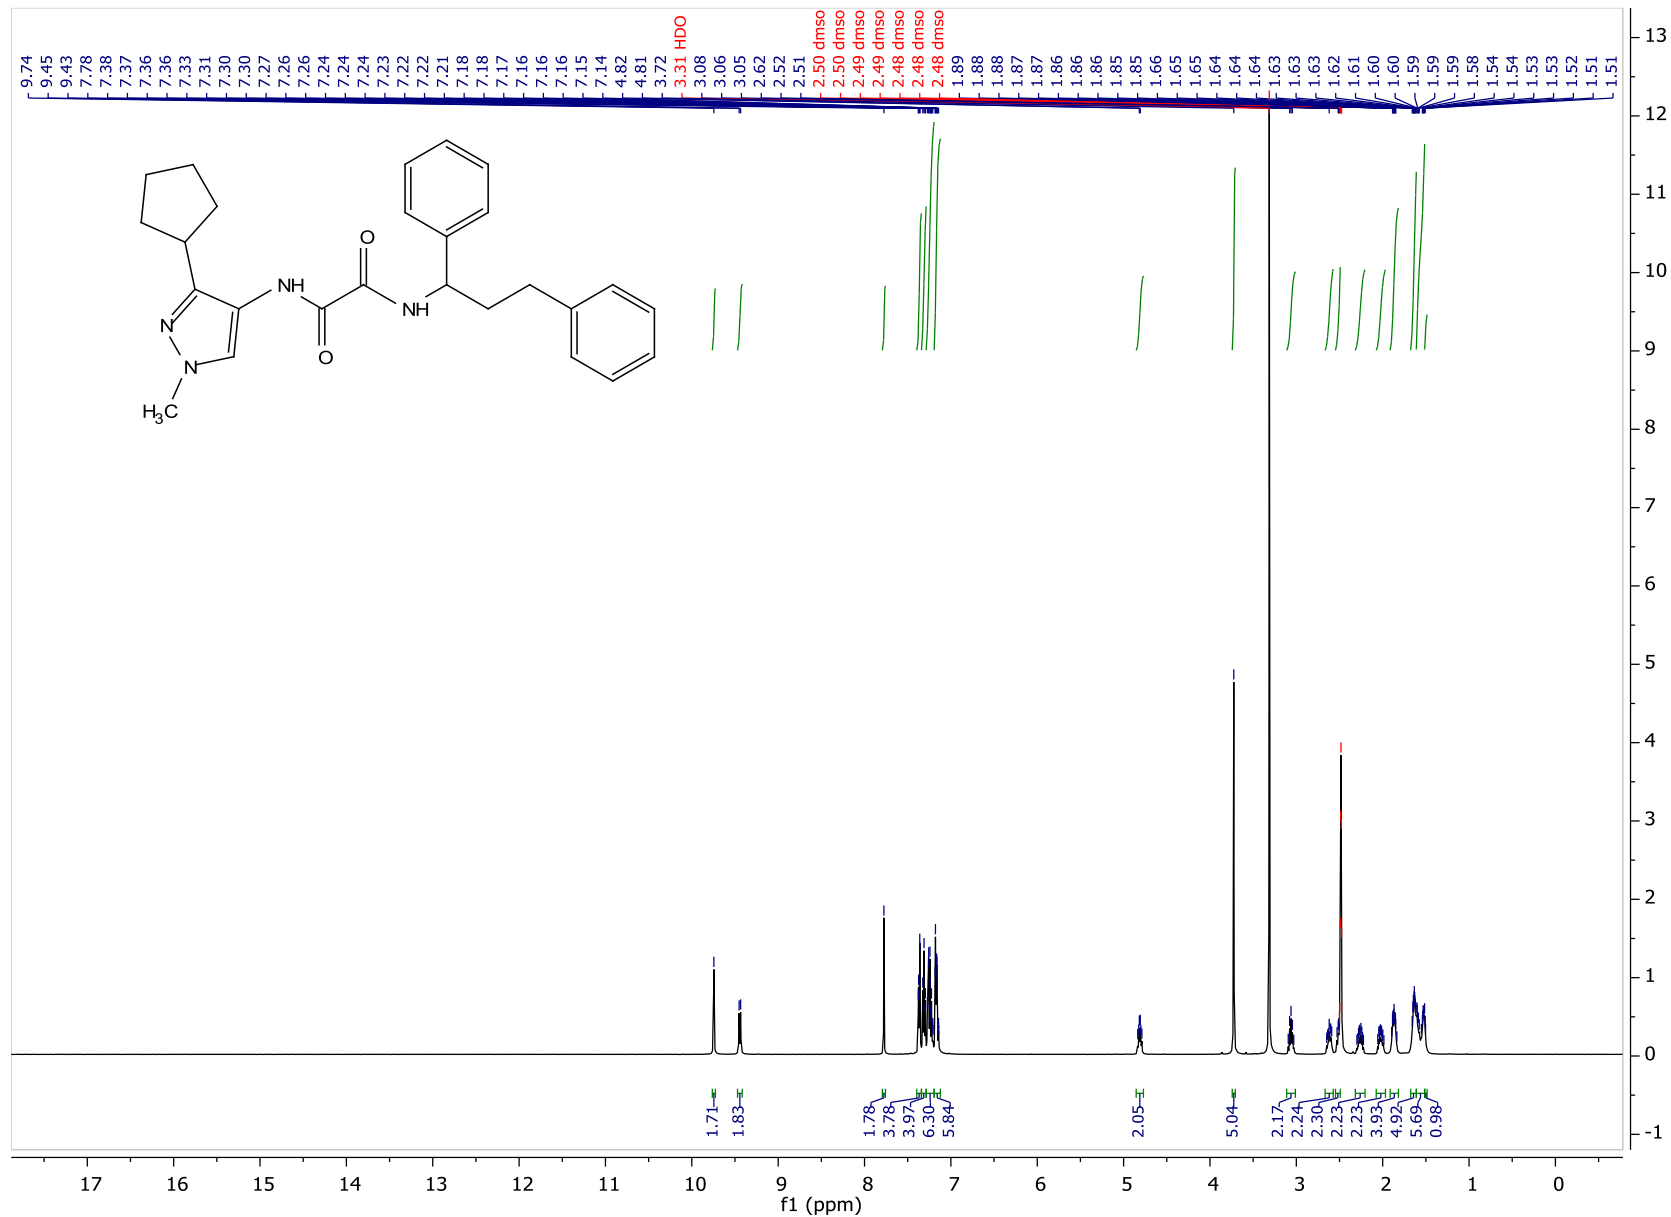

<sup>13</sup>C NMR spectrum of Z4886924881

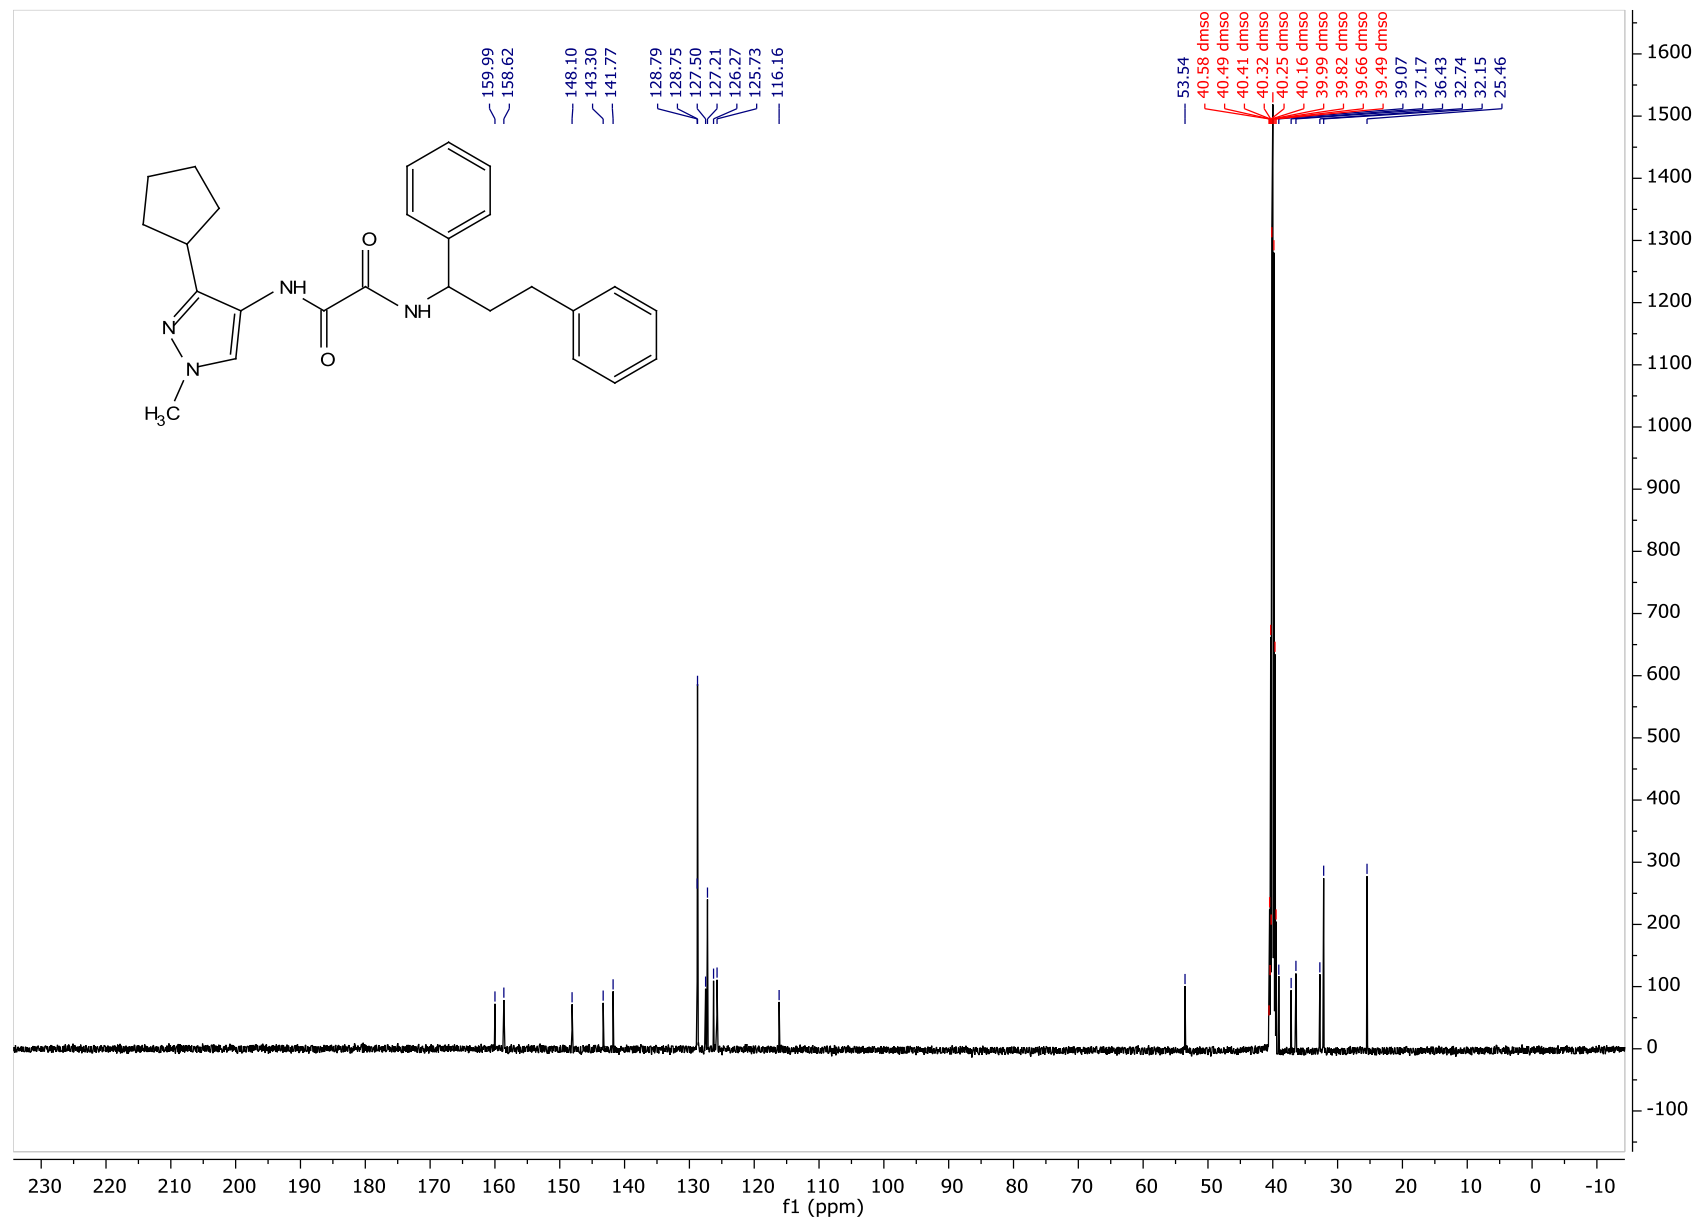

LC/MS spectrum of Z4886924881

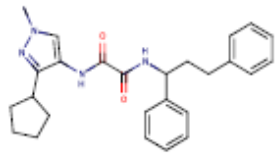

Mol Wt 430.54  
Exact Mass 430.28  
# Time Area%

| # | Time  | Area%  |
|---|-------|--------|
| 1 | 1.585 | 100.00 |

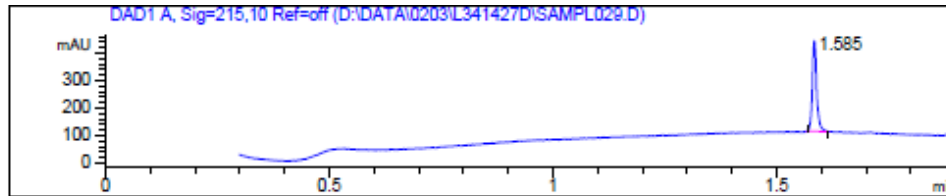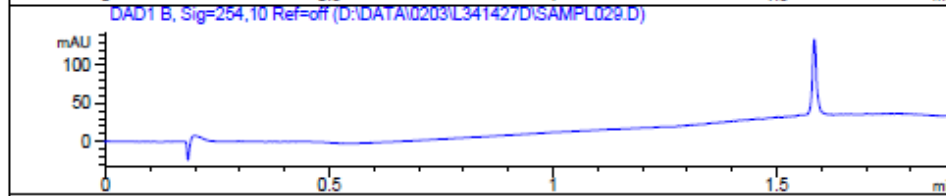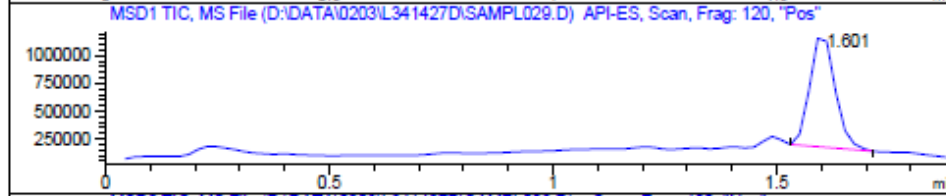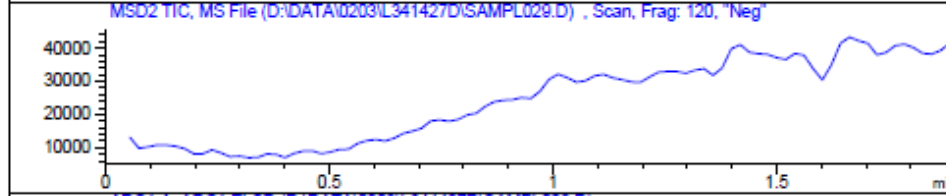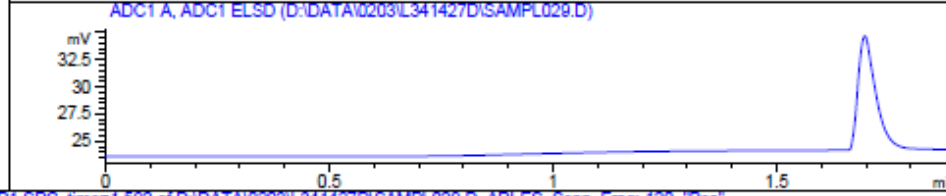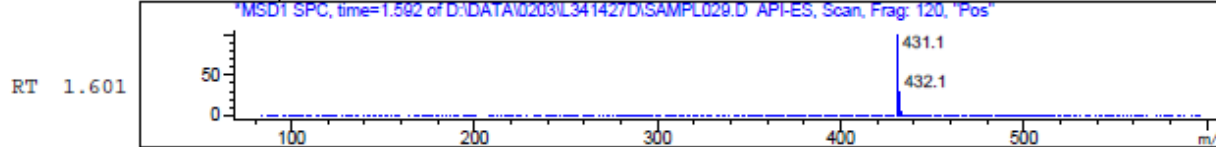

<sup>1</sup>H NMR spectrum of Z4886924947

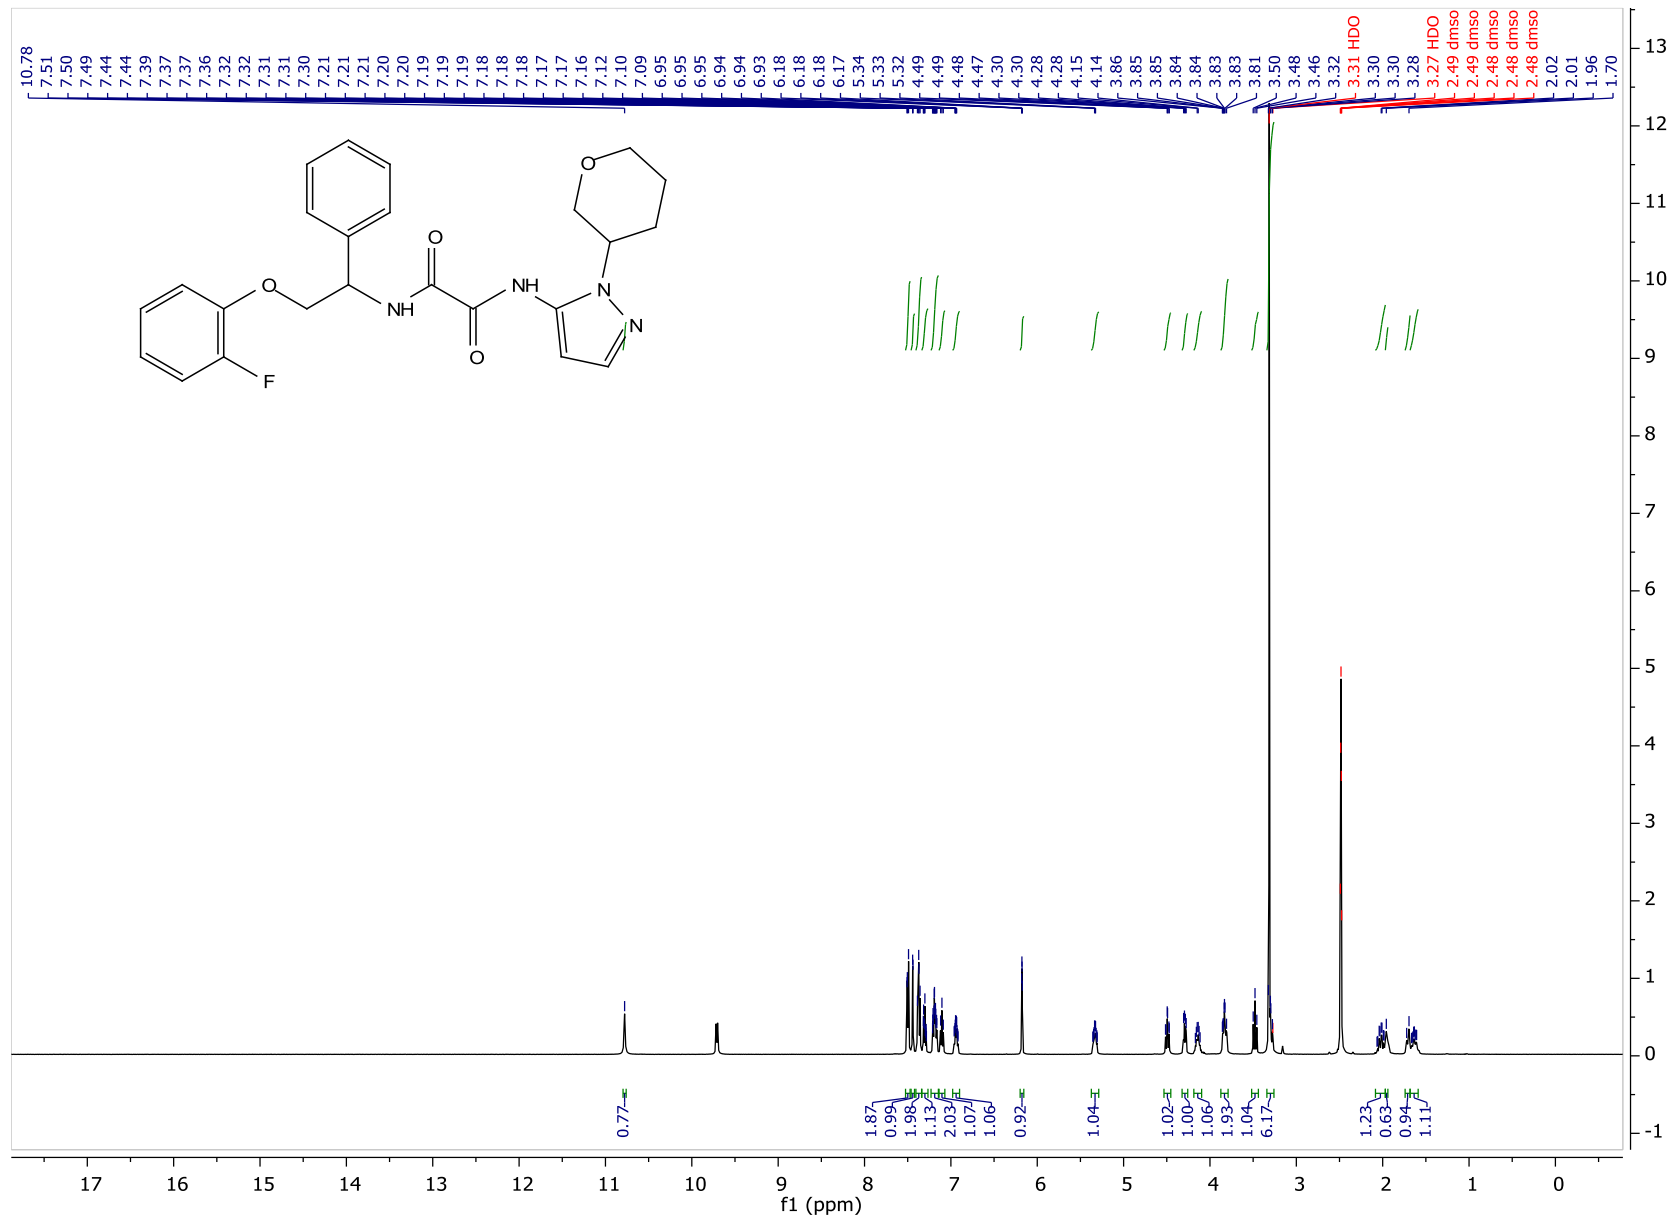

<sup>13</sup>C NMR spectrum of Z4886924947

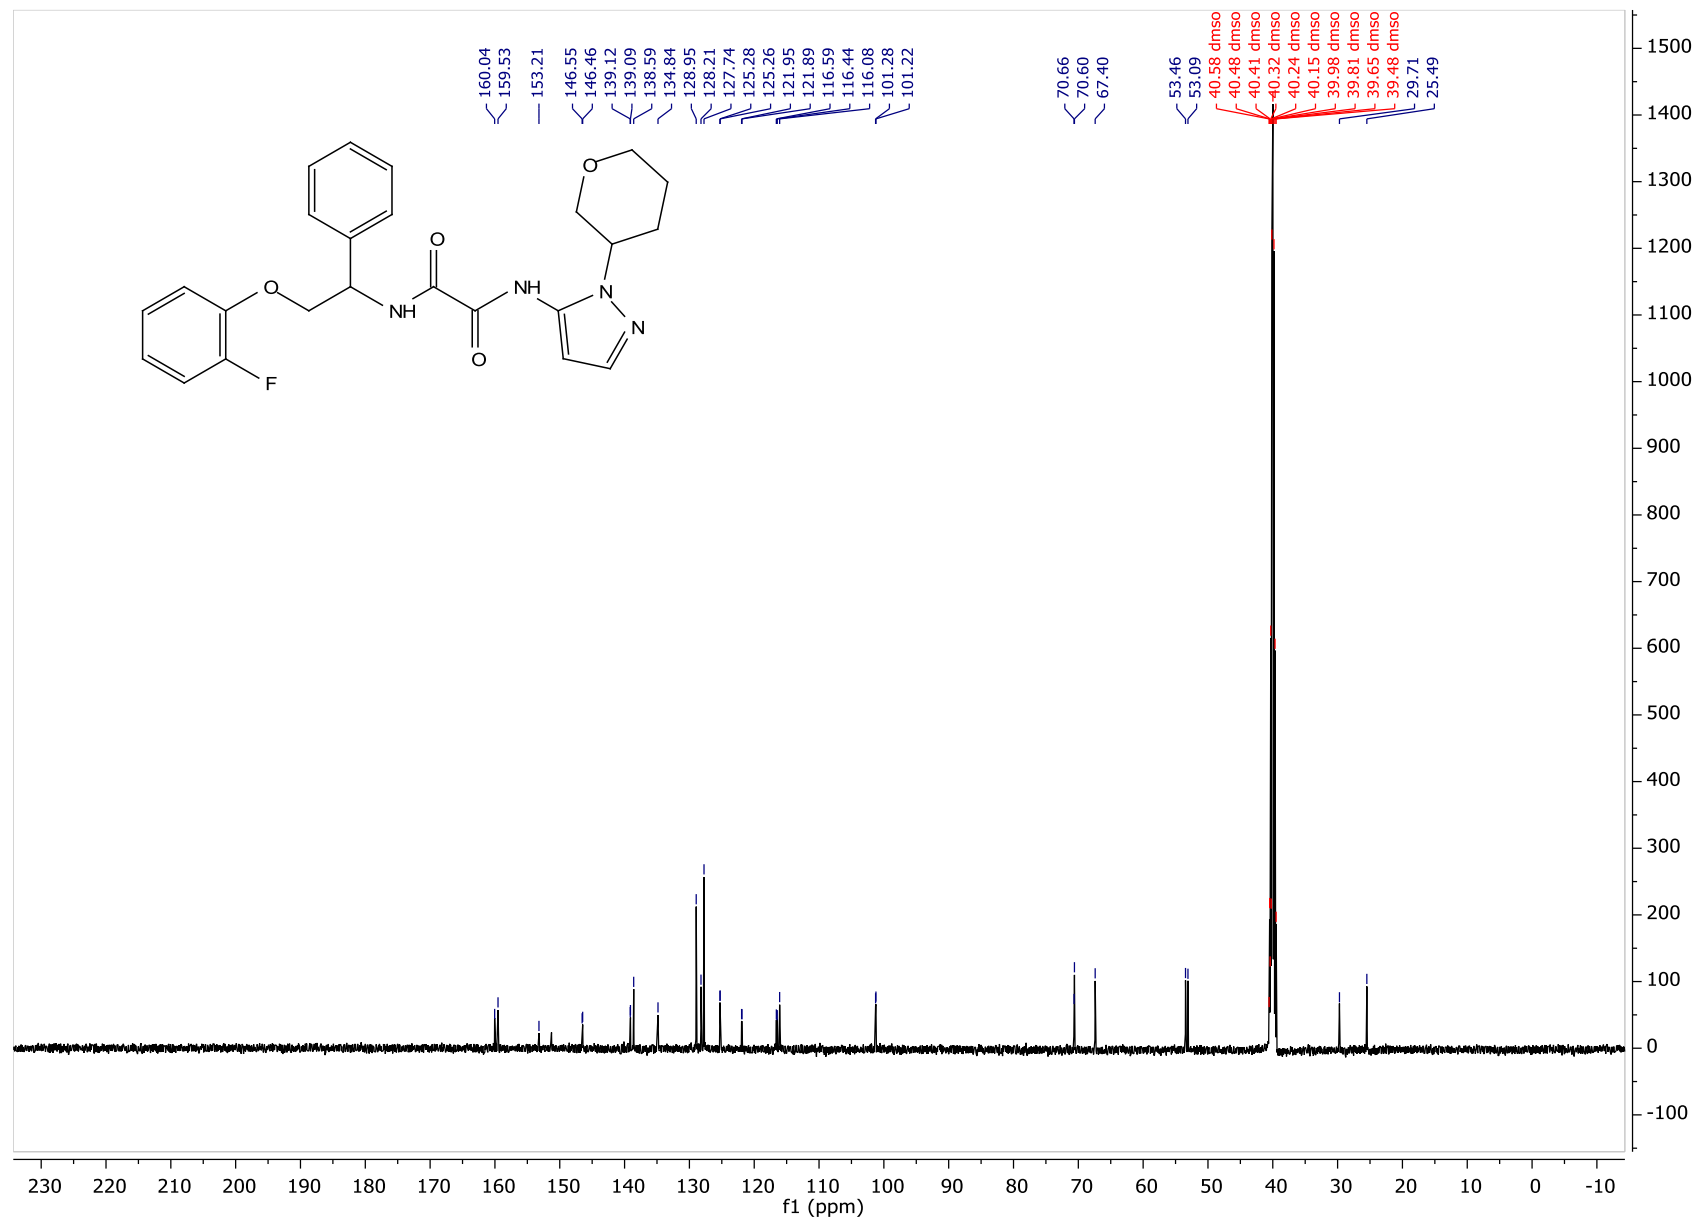

LC/MS spectrum of Z4886924947

Ret\_Time: 1.399 min

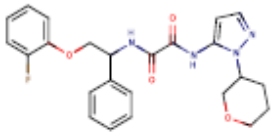

Mol Wt 452.48  
 Exact Mass 452.21

| # | Time  | Area%  |
|---|-------|--------|
| 1 | 1.399 | 100.00 |

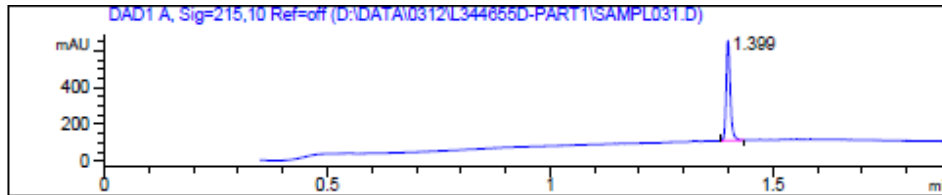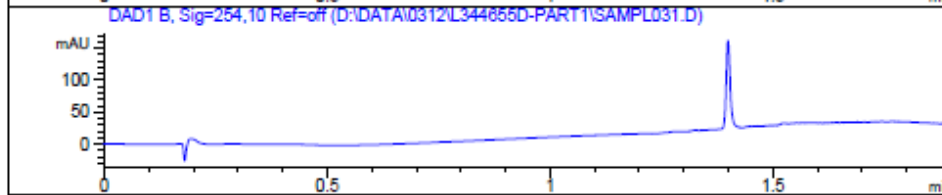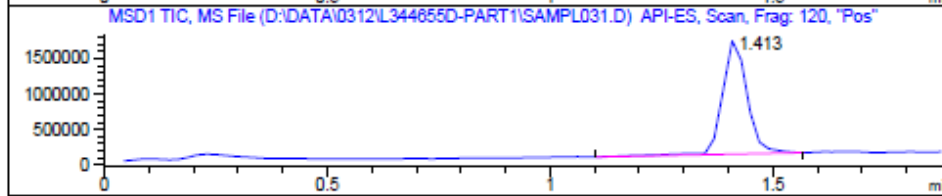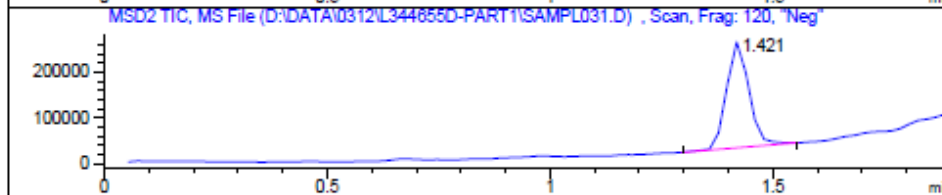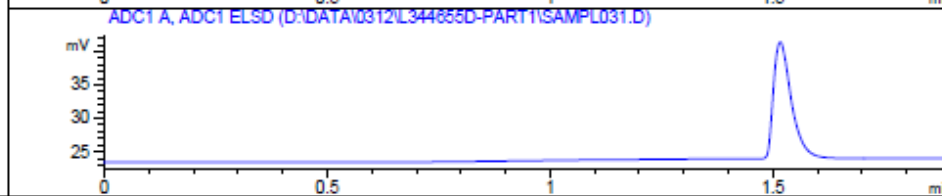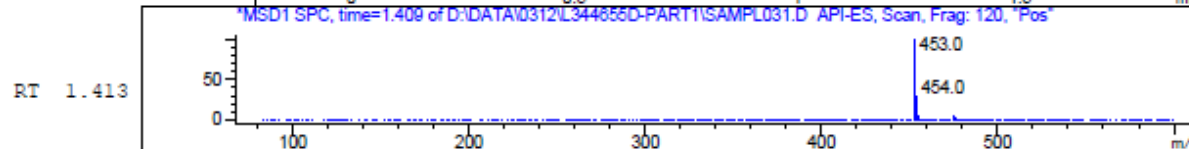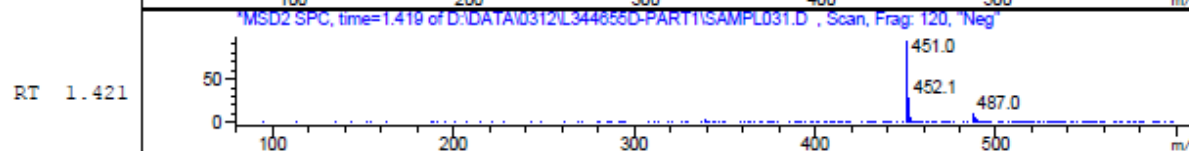

<sup>1</sup>H NMR spectrum of Z4886925010

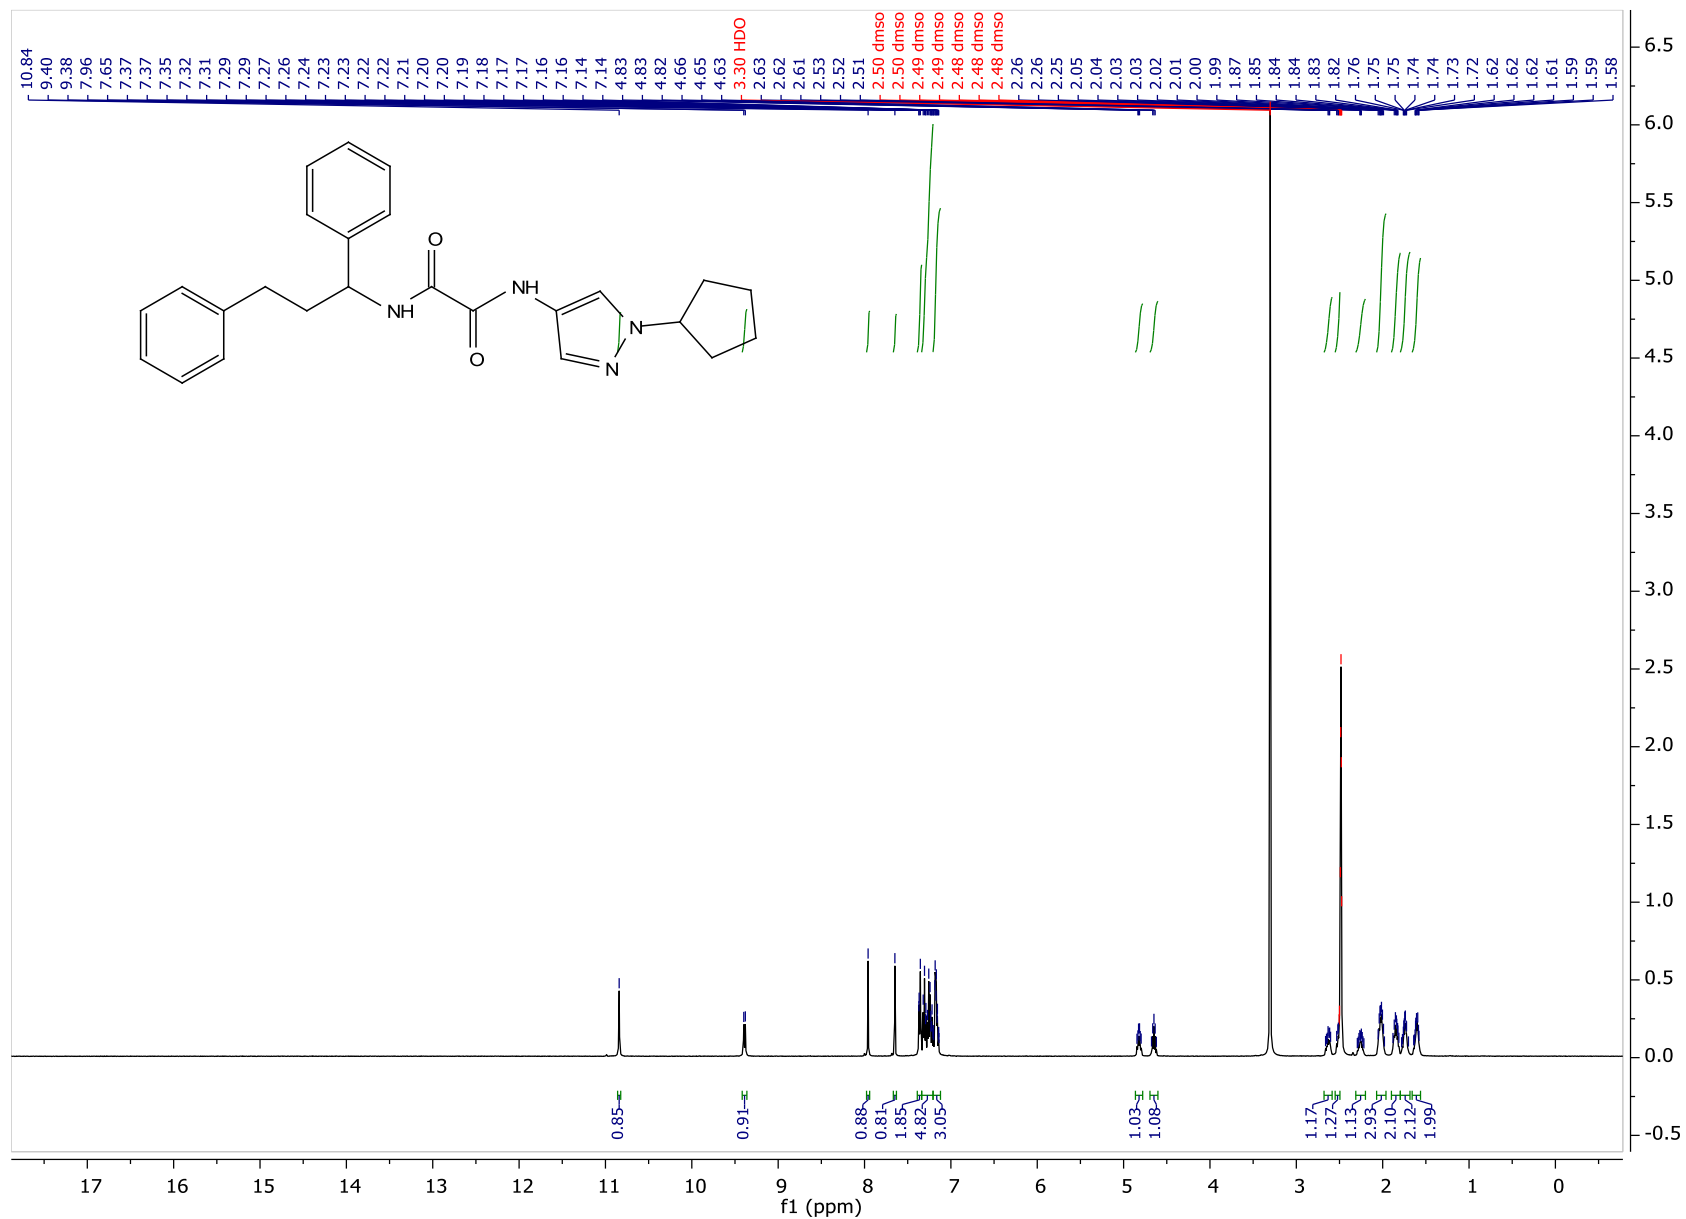

LC/MS spectrum of Z4886925010

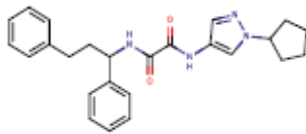

Mol Wt 416.52  
 Exact Mass 416.26

| # | Time  | Area%  |
|---|-------|--------|
| 1 | 1.505 | 100.00 |

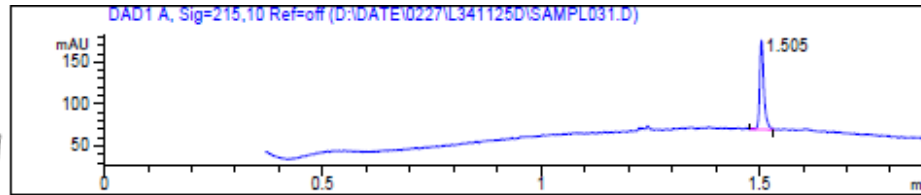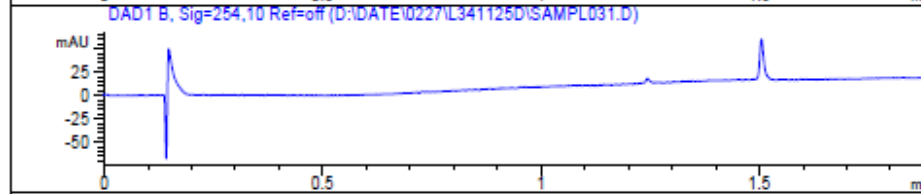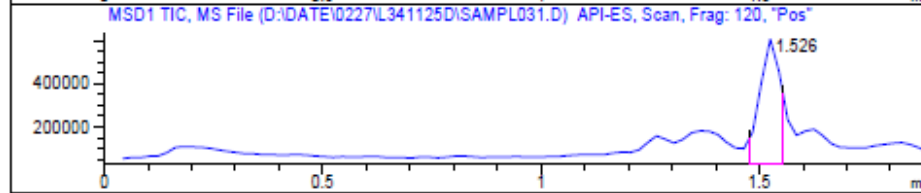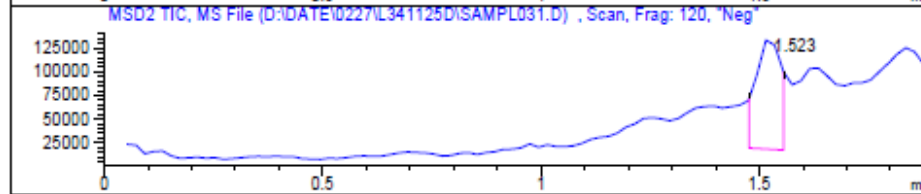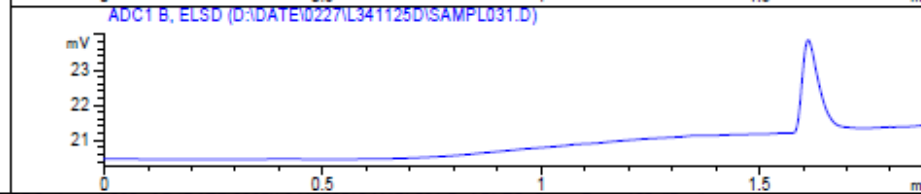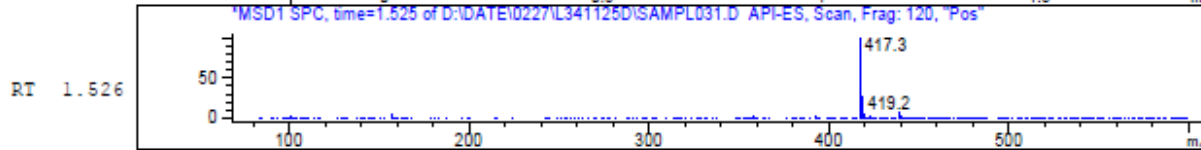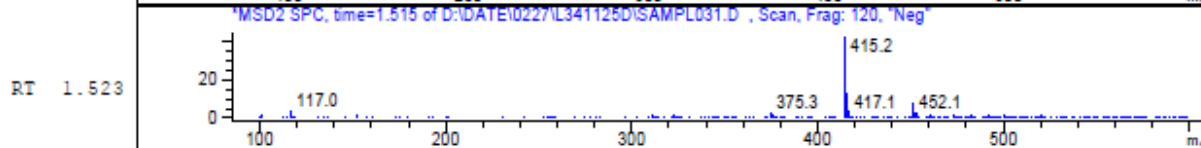



<sup>1</sup>H NMR spectrum of Z4886925912

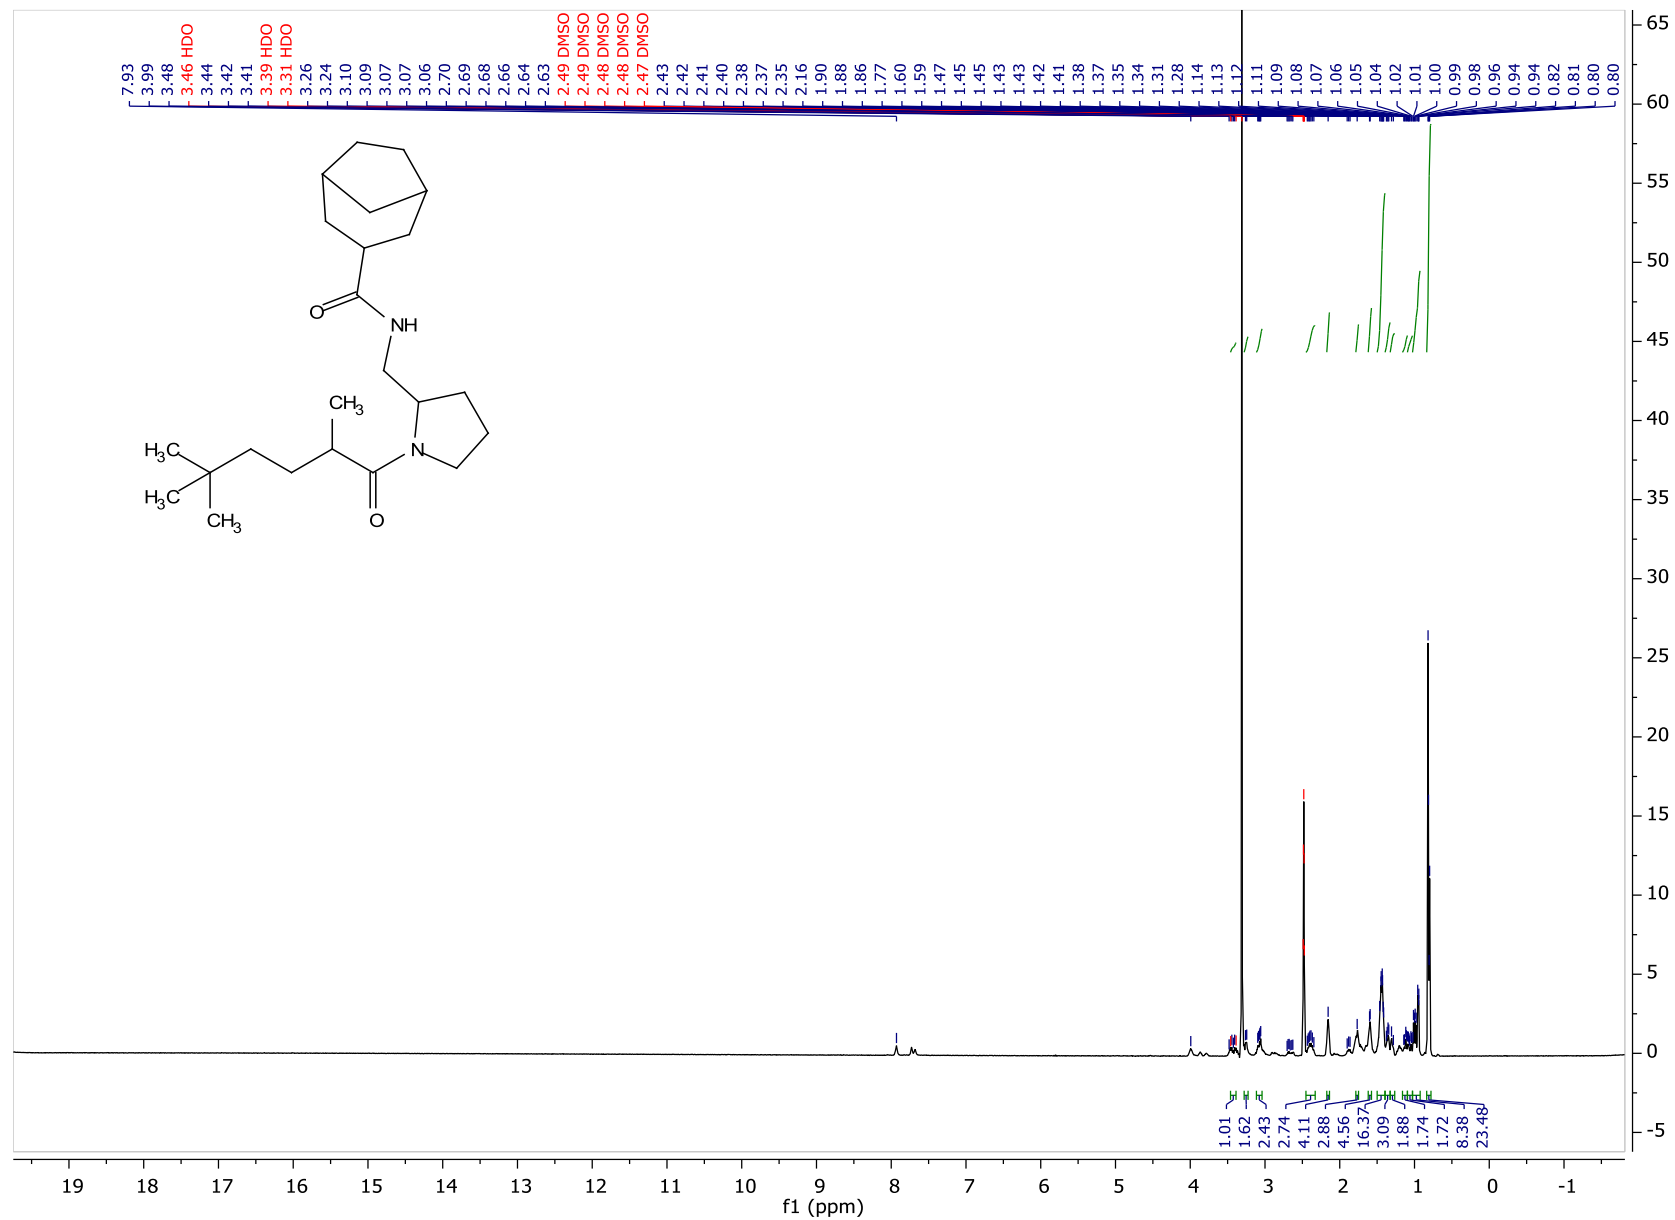

<sup>13</sup>C NMR spectrum of Z4886925912

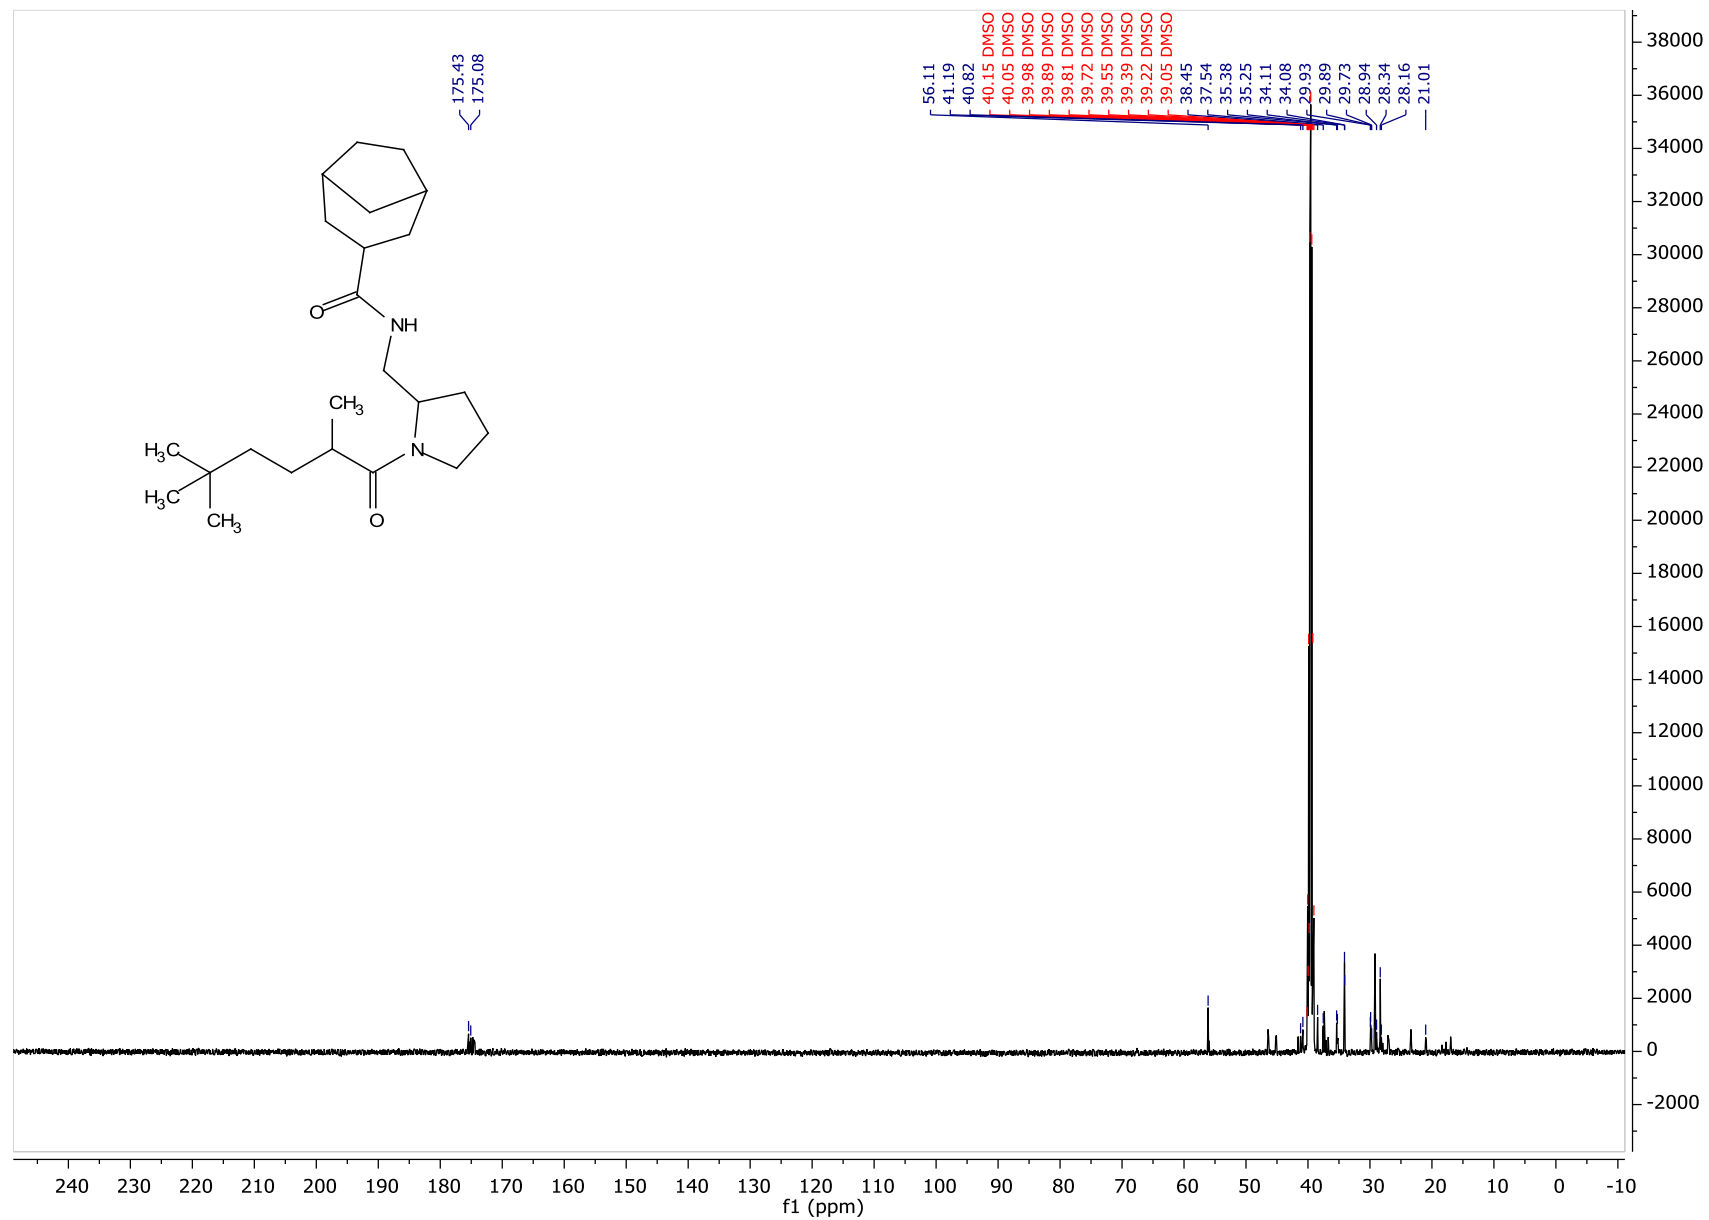

LC/MS spectrum of Z4886925912

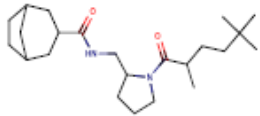

Mol Wt 376.58  
Exact Mass 376.38

| # | Time  | Area% |
|---|-------|-------|
| 1 | 1.410 | 6.61  |
| 2 | 1.487 | 93.39 |

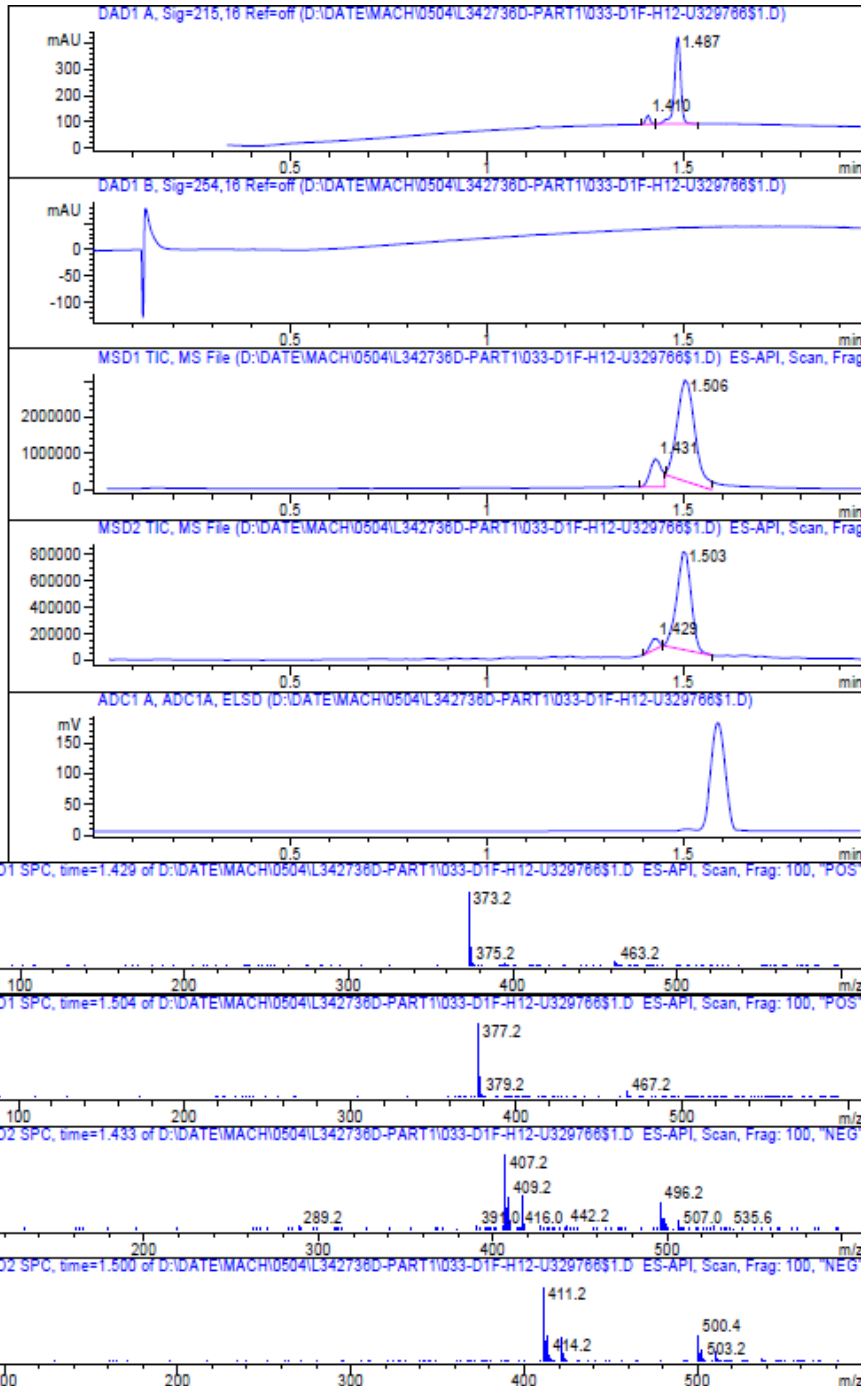

<sup>1</sup>H NMR spectrum of Z4886926284

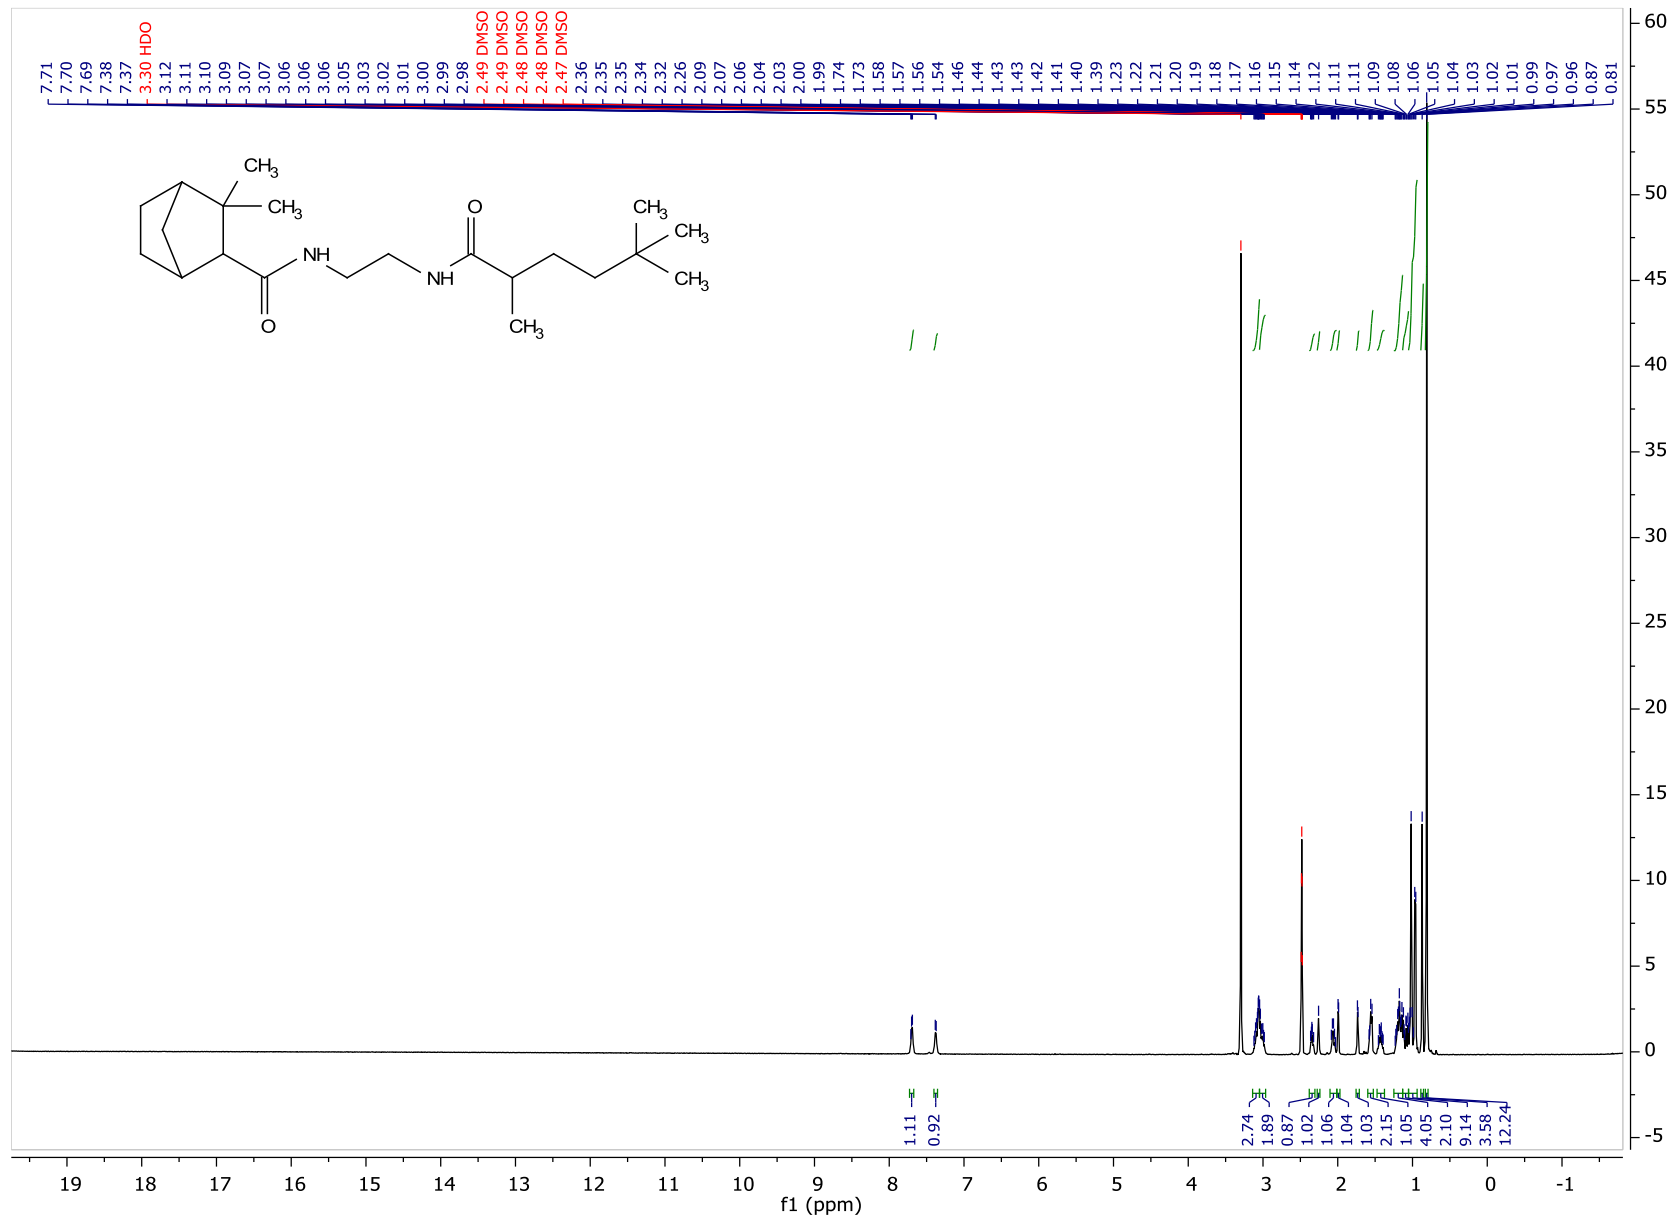

<sup>13</sup>C NMR spectrum of Z4886926284

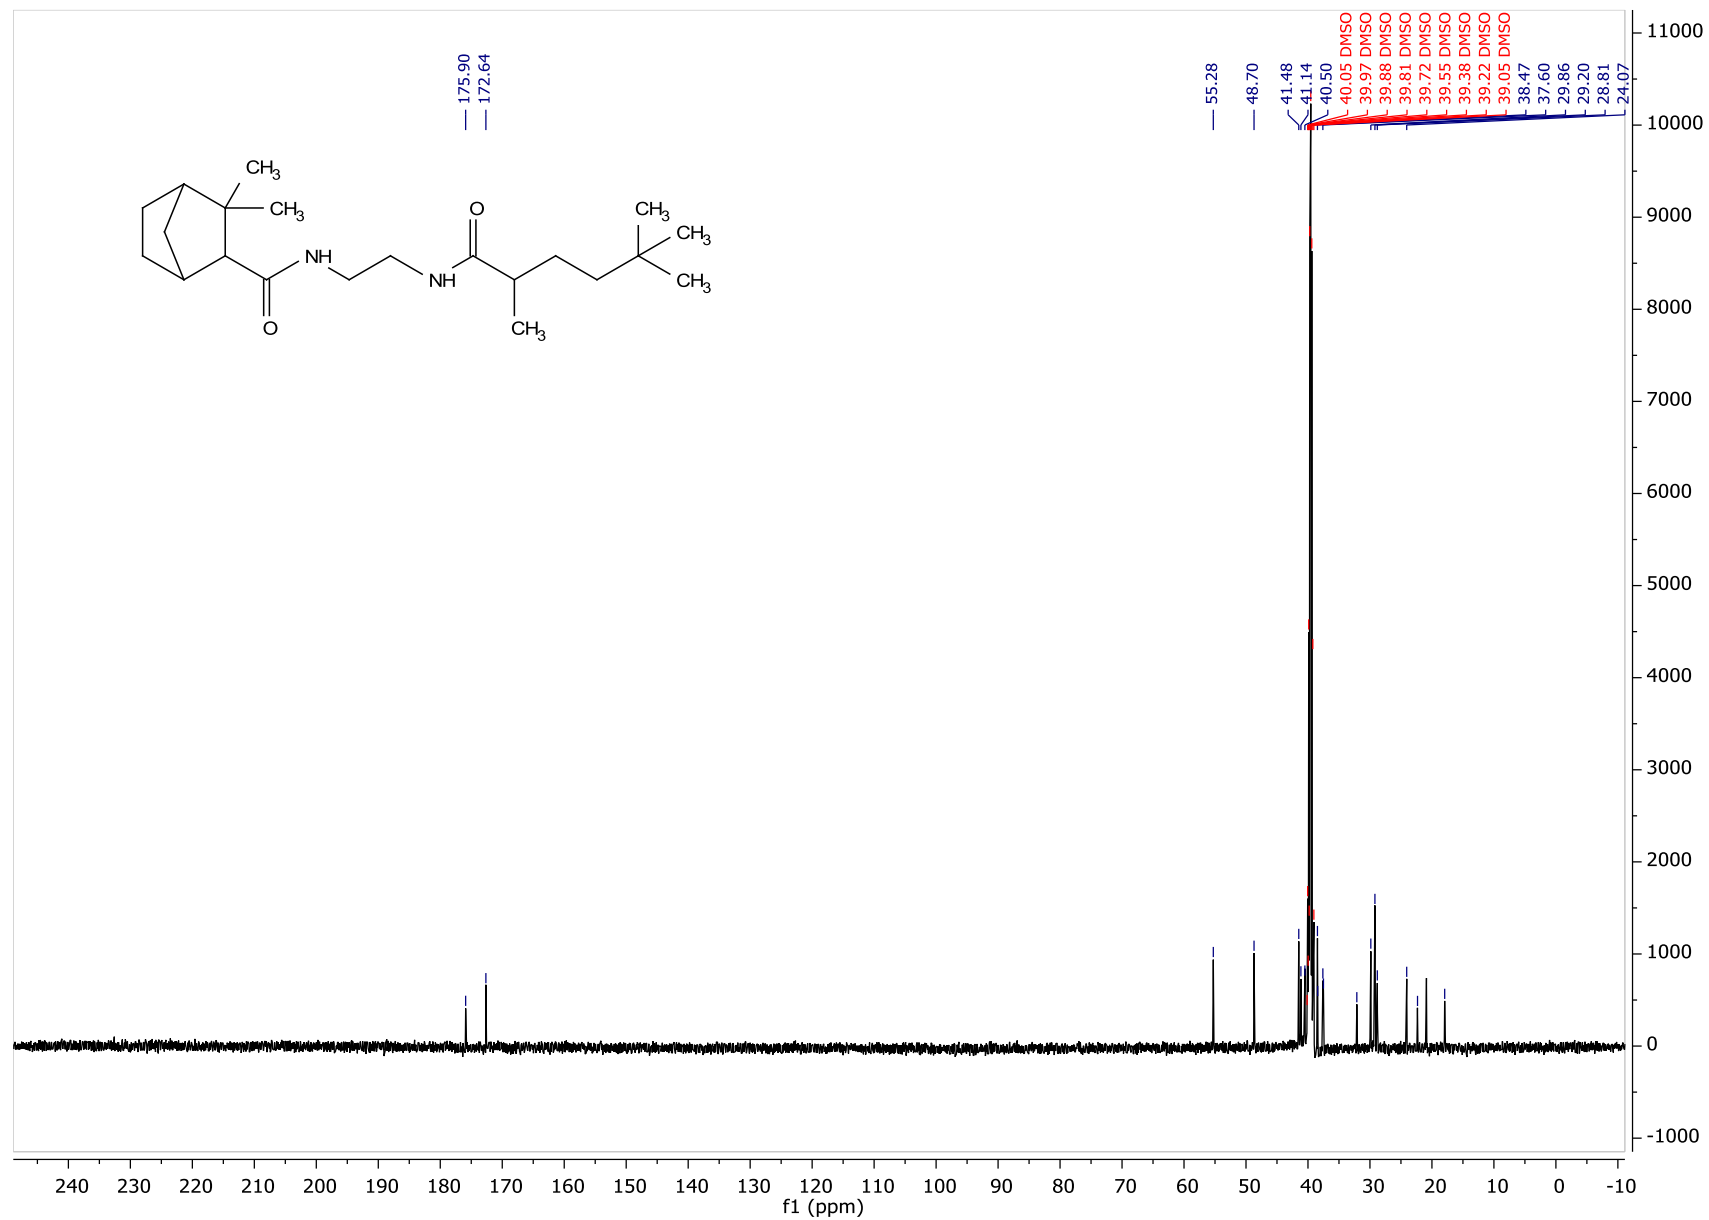

LC/MS spectrum of Z4886926284

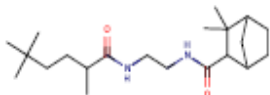

Mol Wt 350.54  
 Exact Mass 350.36

| # | Time  | Area%  |
|---|-------|--------|
| 1 | 1.500 | 100.00 |

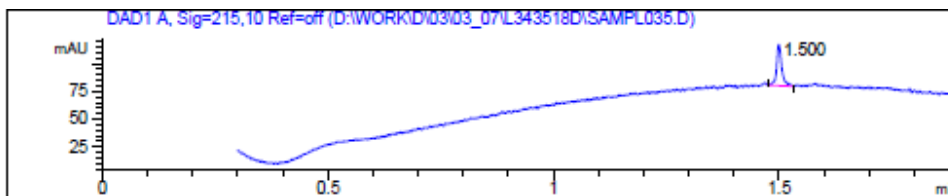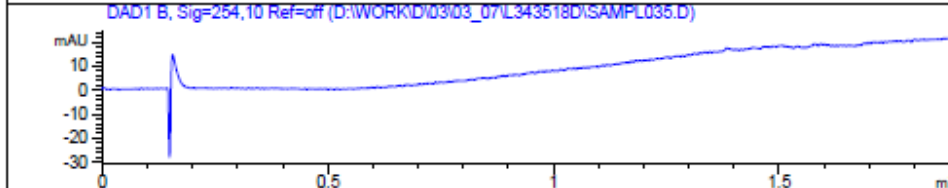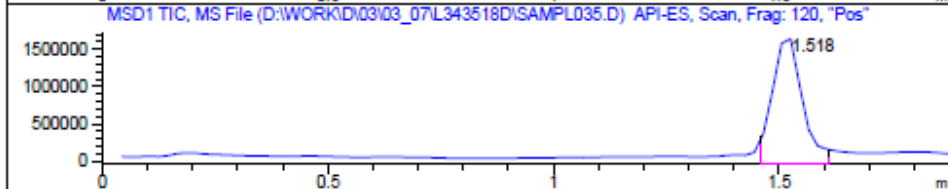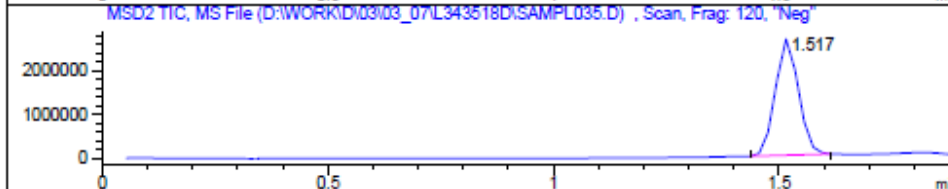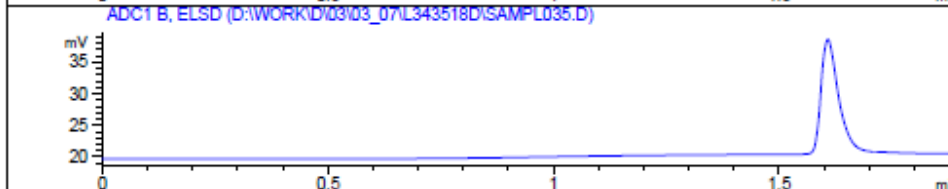

RT 1.518

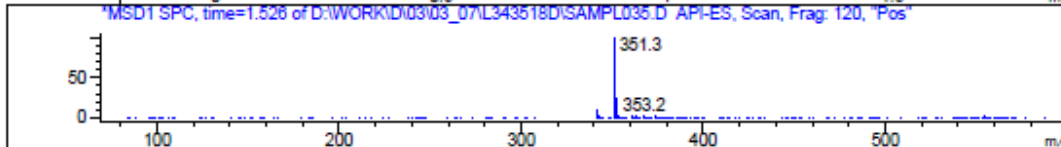

RT 1.517

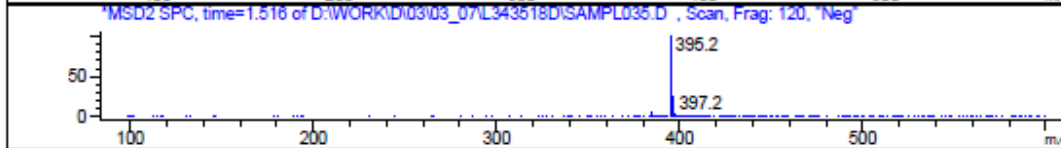

<sup>1</sup>H NMR spectrum of Z4886926555

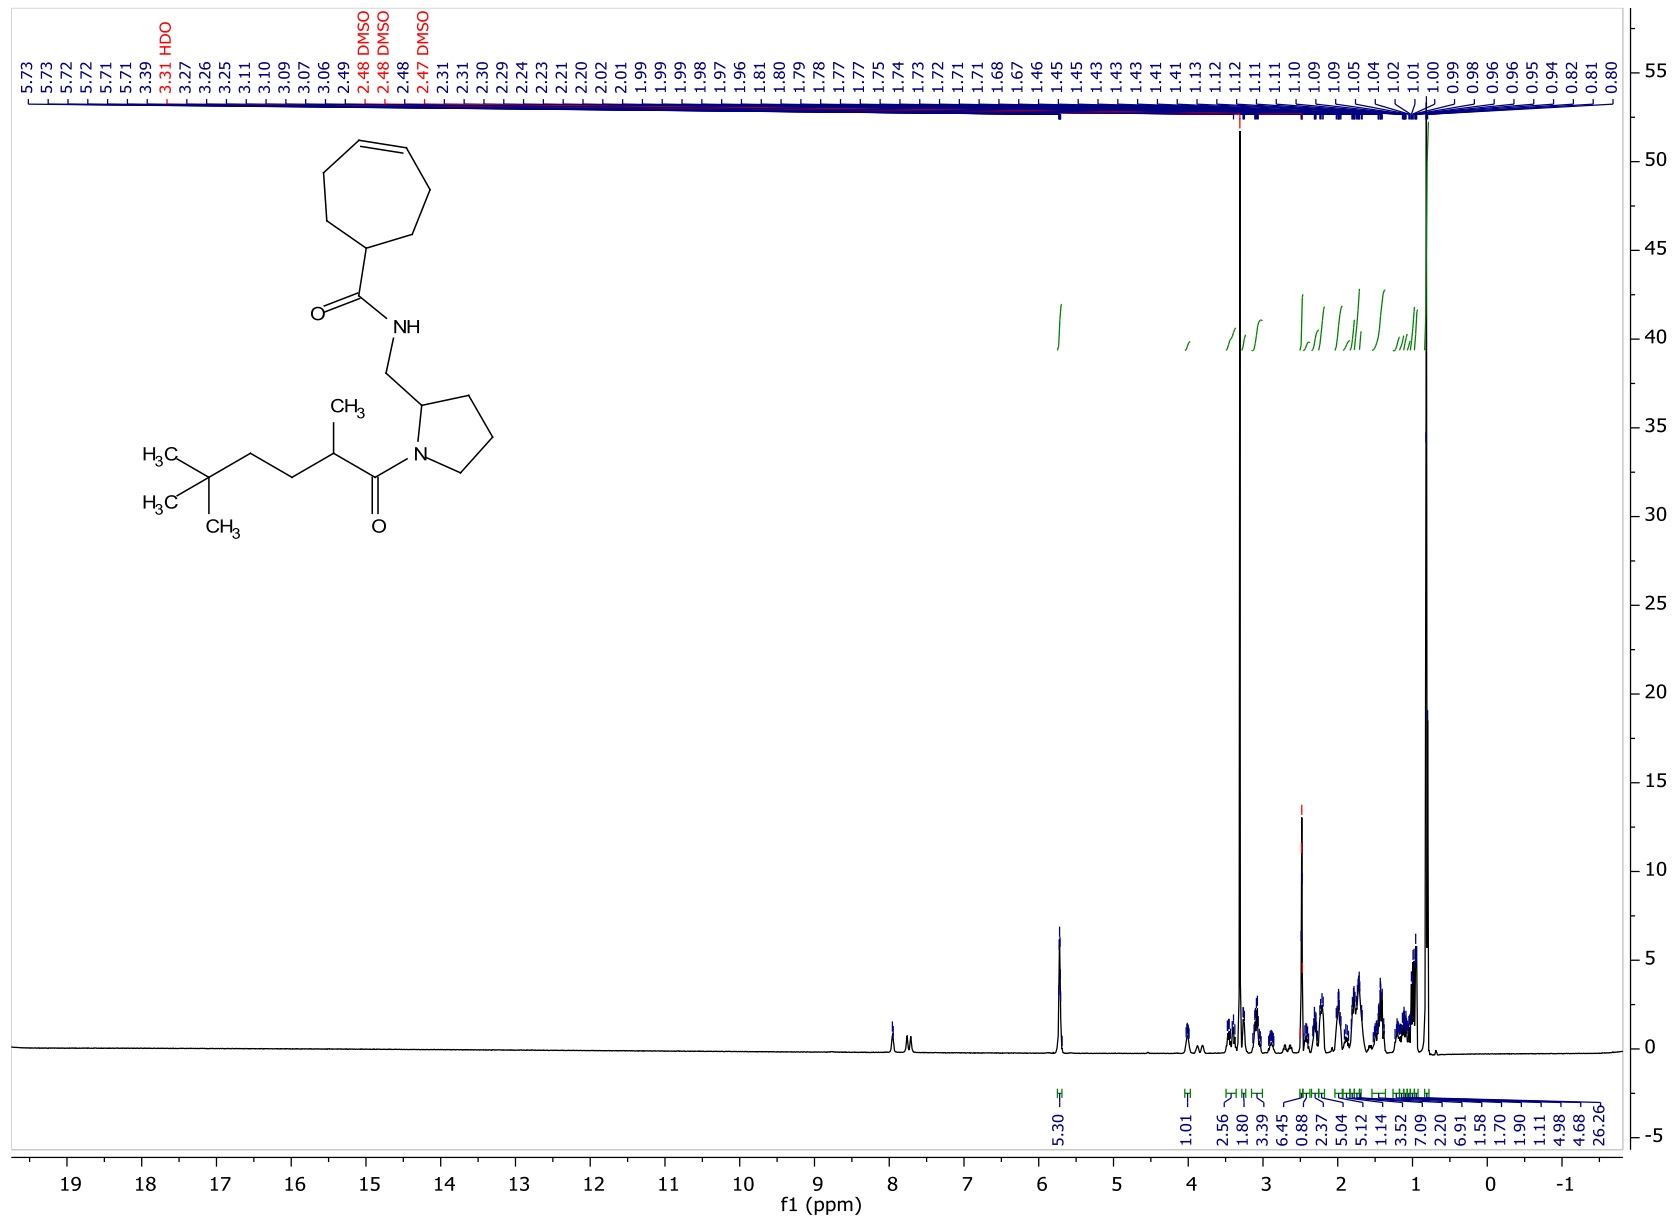

<sup>13</sup>C NMR spectrum of Z4886926555

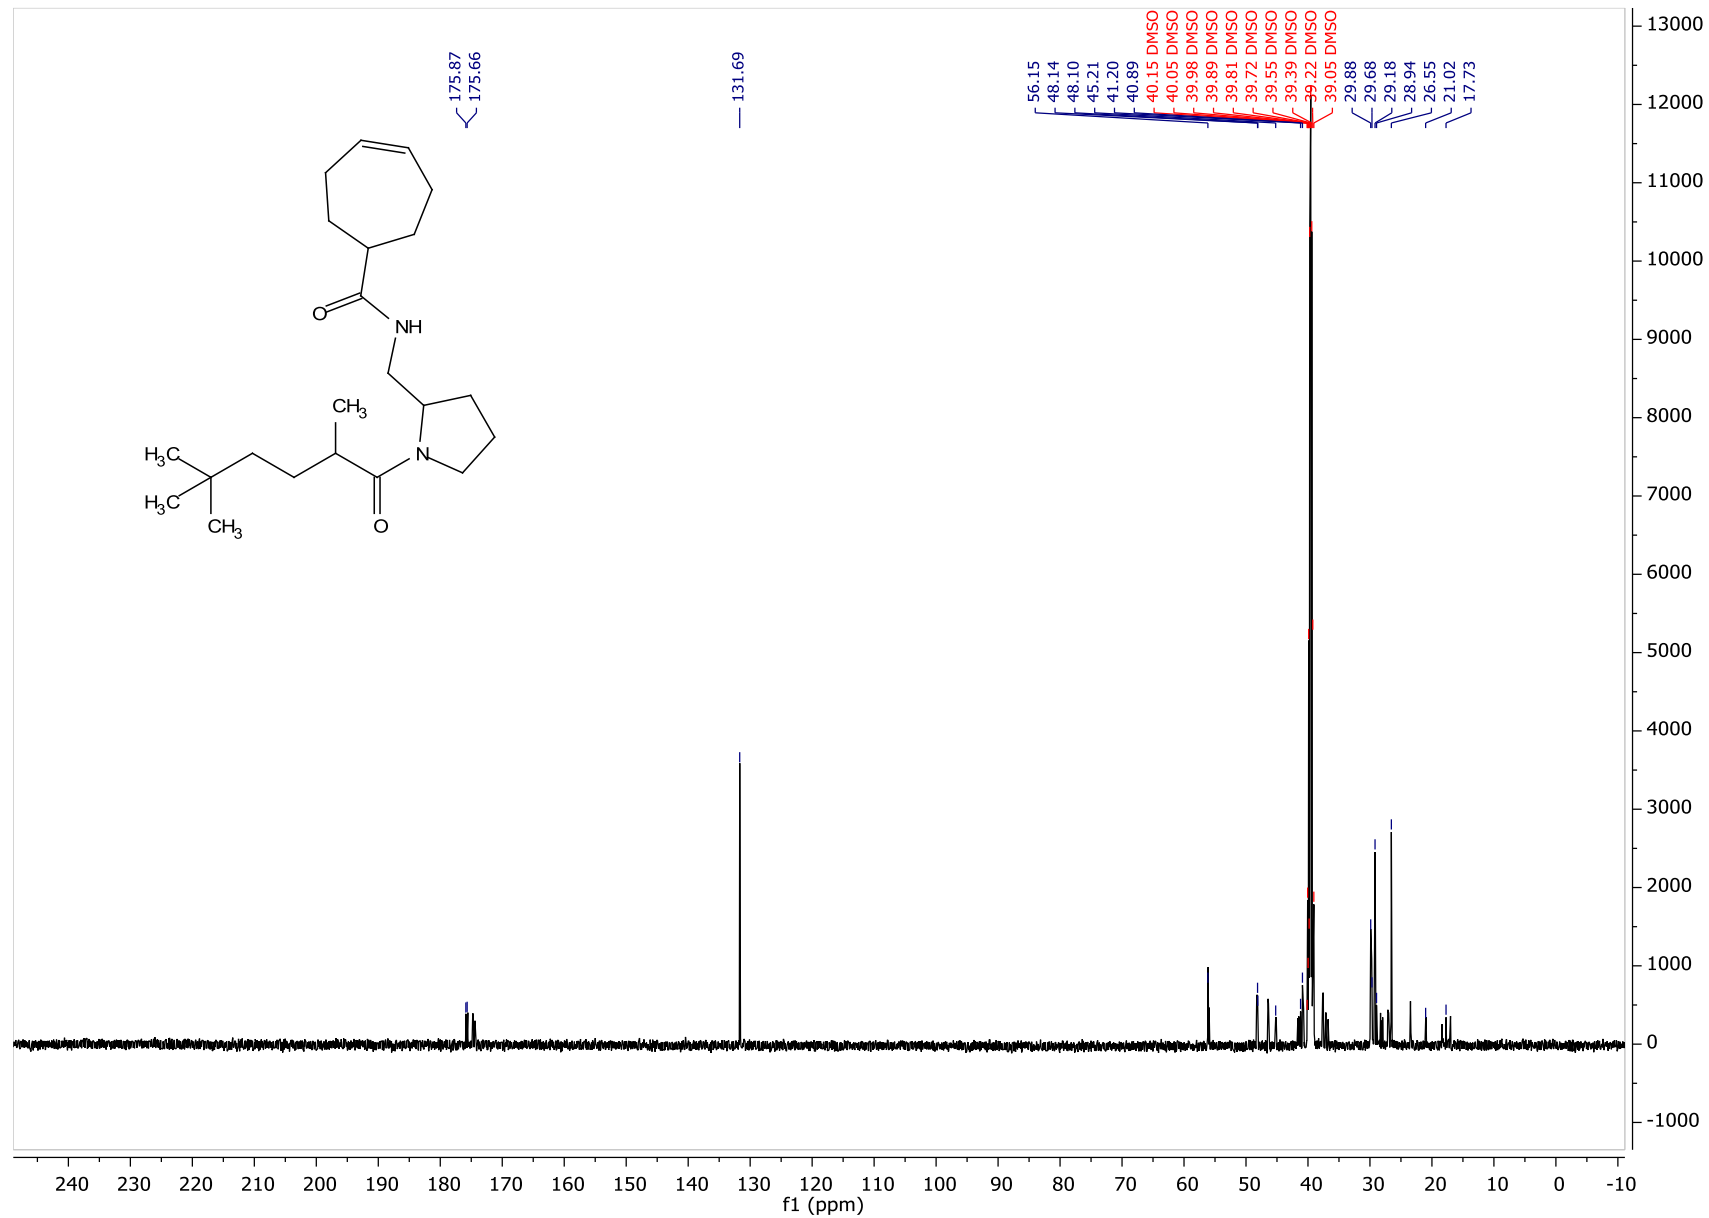



LC/MS spectrum of Z4886926555

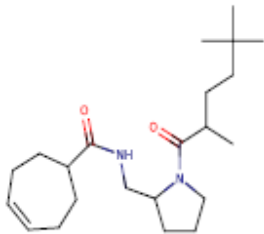

Mol Wt 362.55  
 Exact Mass 362.36

| # | Time  | Area%  |
|---|-------|--------|
| 1 | 1.489 | 100.00 |

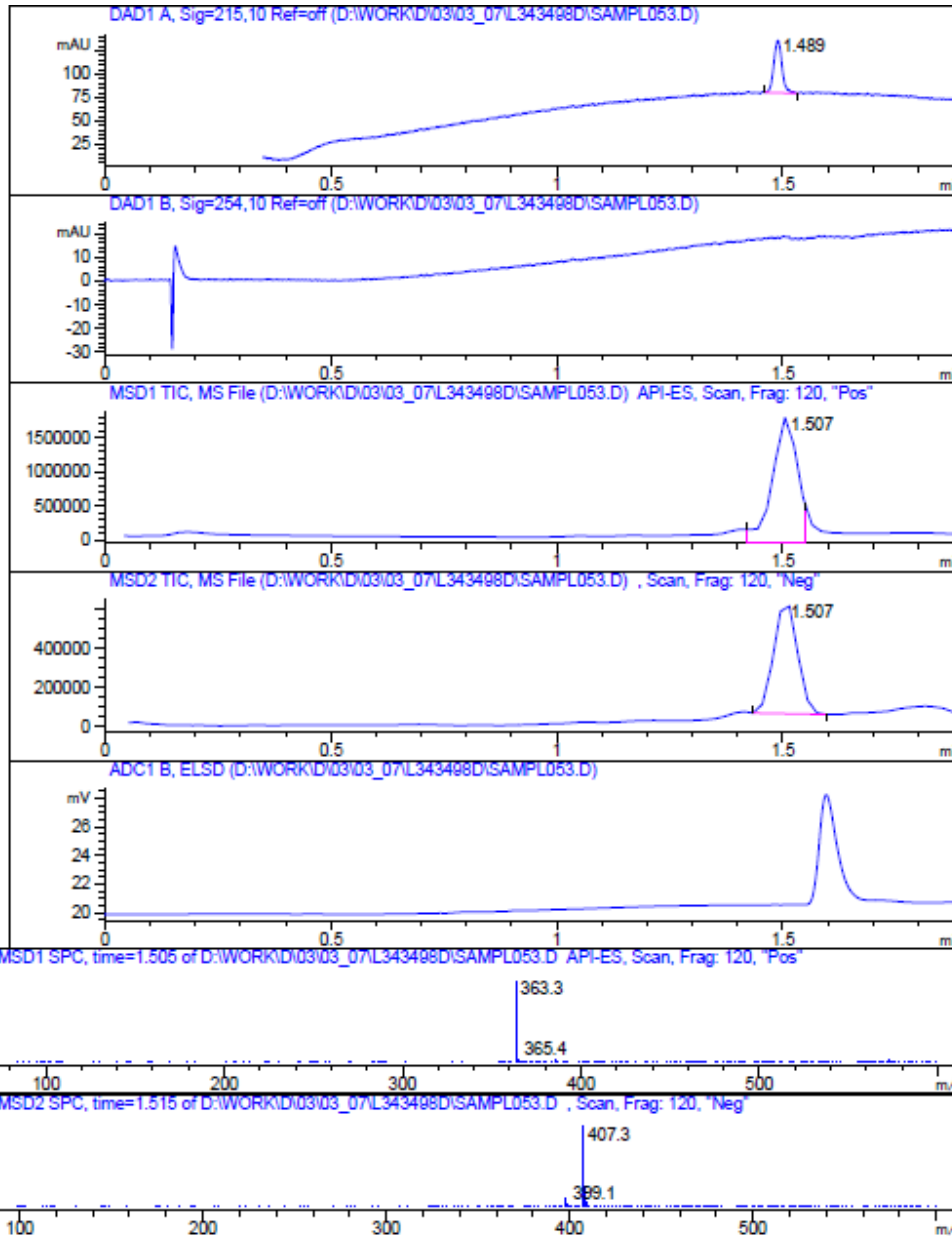

RT 1.507

RT 1.507
